# Supplementary material for: Determining lineage-specific bacterial growth curves with a novel approach based on amplicon reads normalization using internal standard (ARNIS)
Source: PubMed Central journal article supplement (PMC6194029; doi:10.1038/s41396-018-0213-y), 2018-07-06

**Supplementary Figure 1.** Dynamics of specific bacterial lineages determined with the ARNIS ratio in the control treatment (red colour) and bacterivore-free (Filtered–1micron) treatment (blue colour). Circles and triangles show values in replicates of the control and bacterivore-free treatments, respectively. Lines connect average values (crossed circles) from the treatments.

## OTU.3\_Actinobacteria\_clade\_acl\_B1

Treatment Control Filtered-1micron

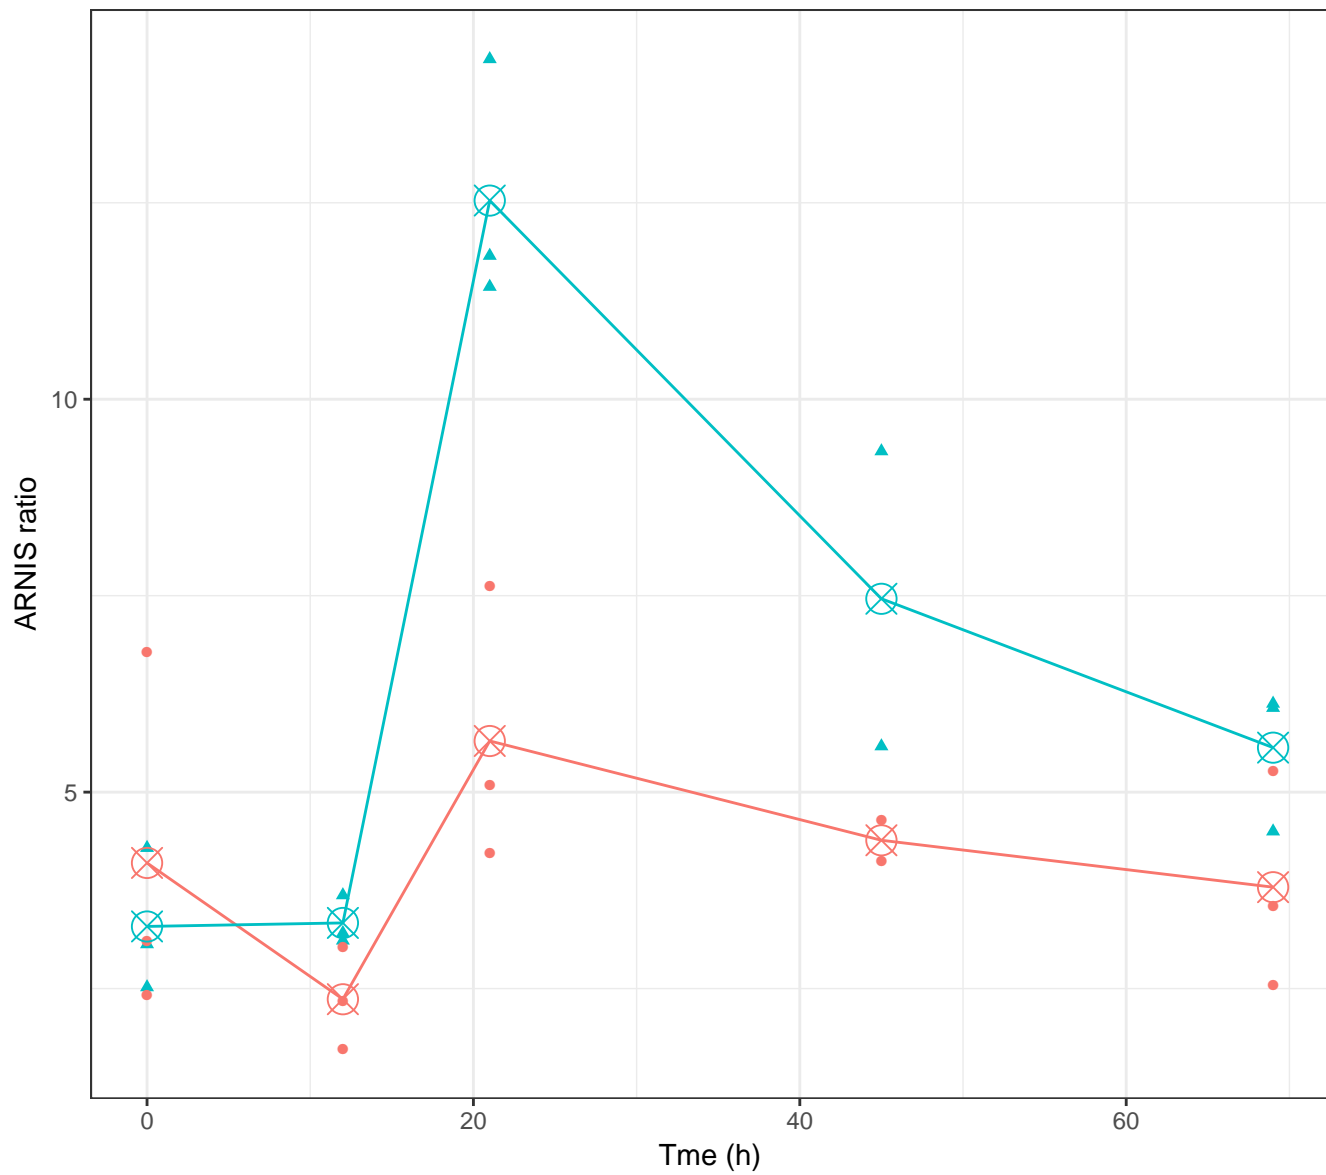

# OTU.12\_Verrucomicrobia\_FukuN18\_freshwater\_group

Treatment ⊗ Control ⊗ Filtered-1micron

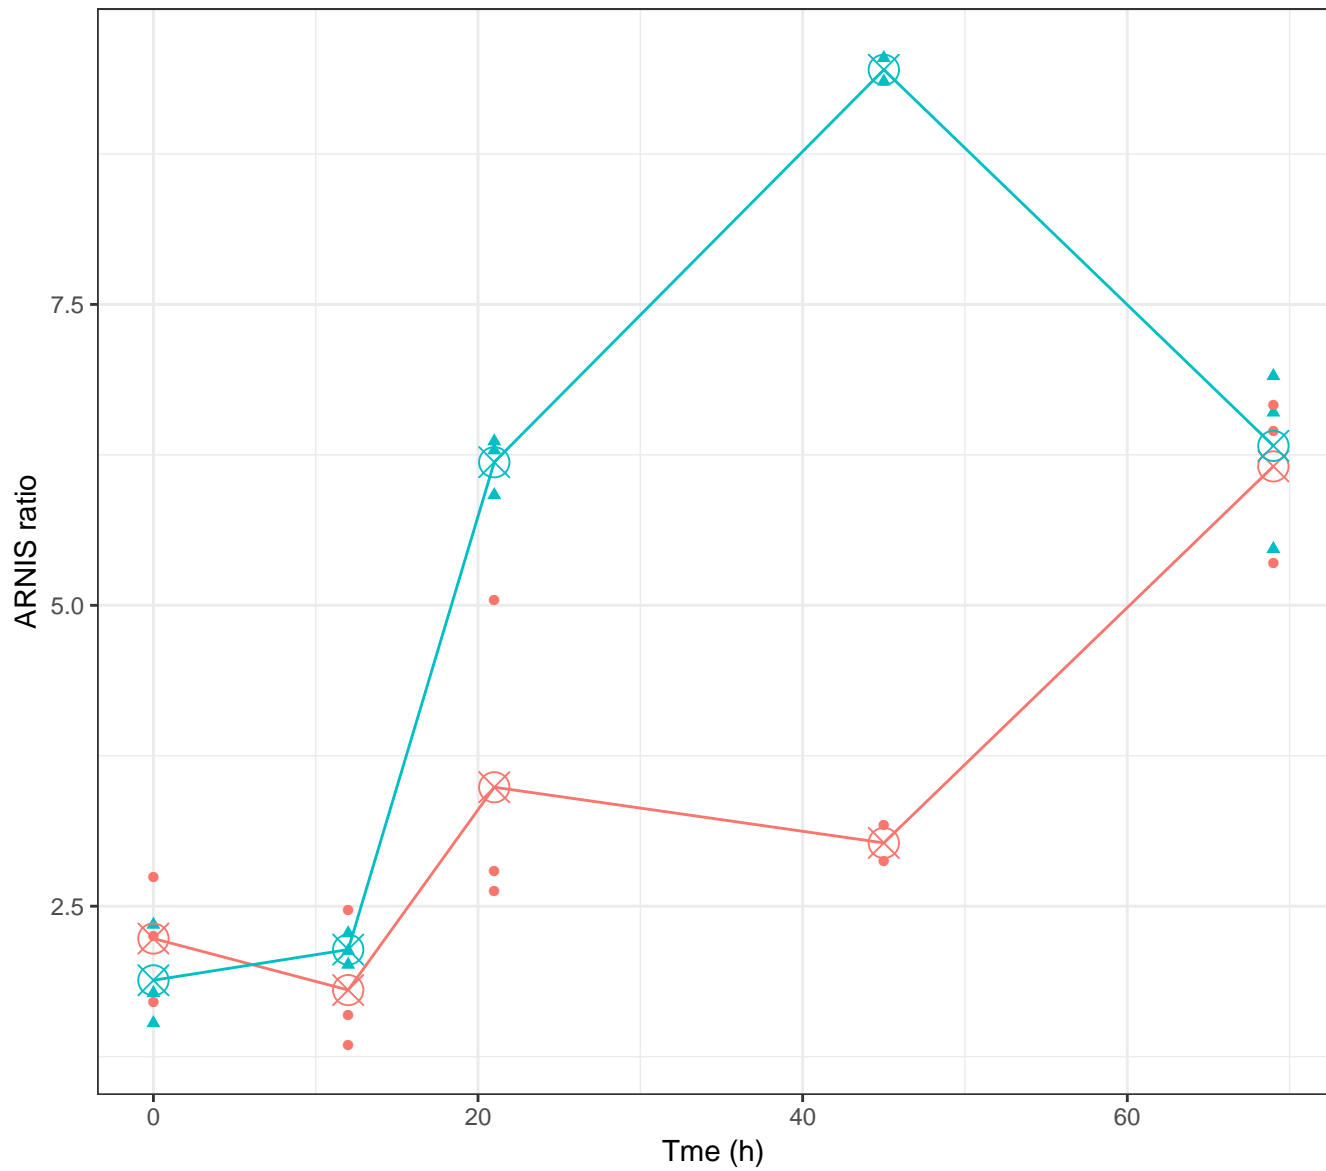

## OTU.24\_Bacteroidetes\_Leadbetterella

Treatment  Control  Filtered-1micron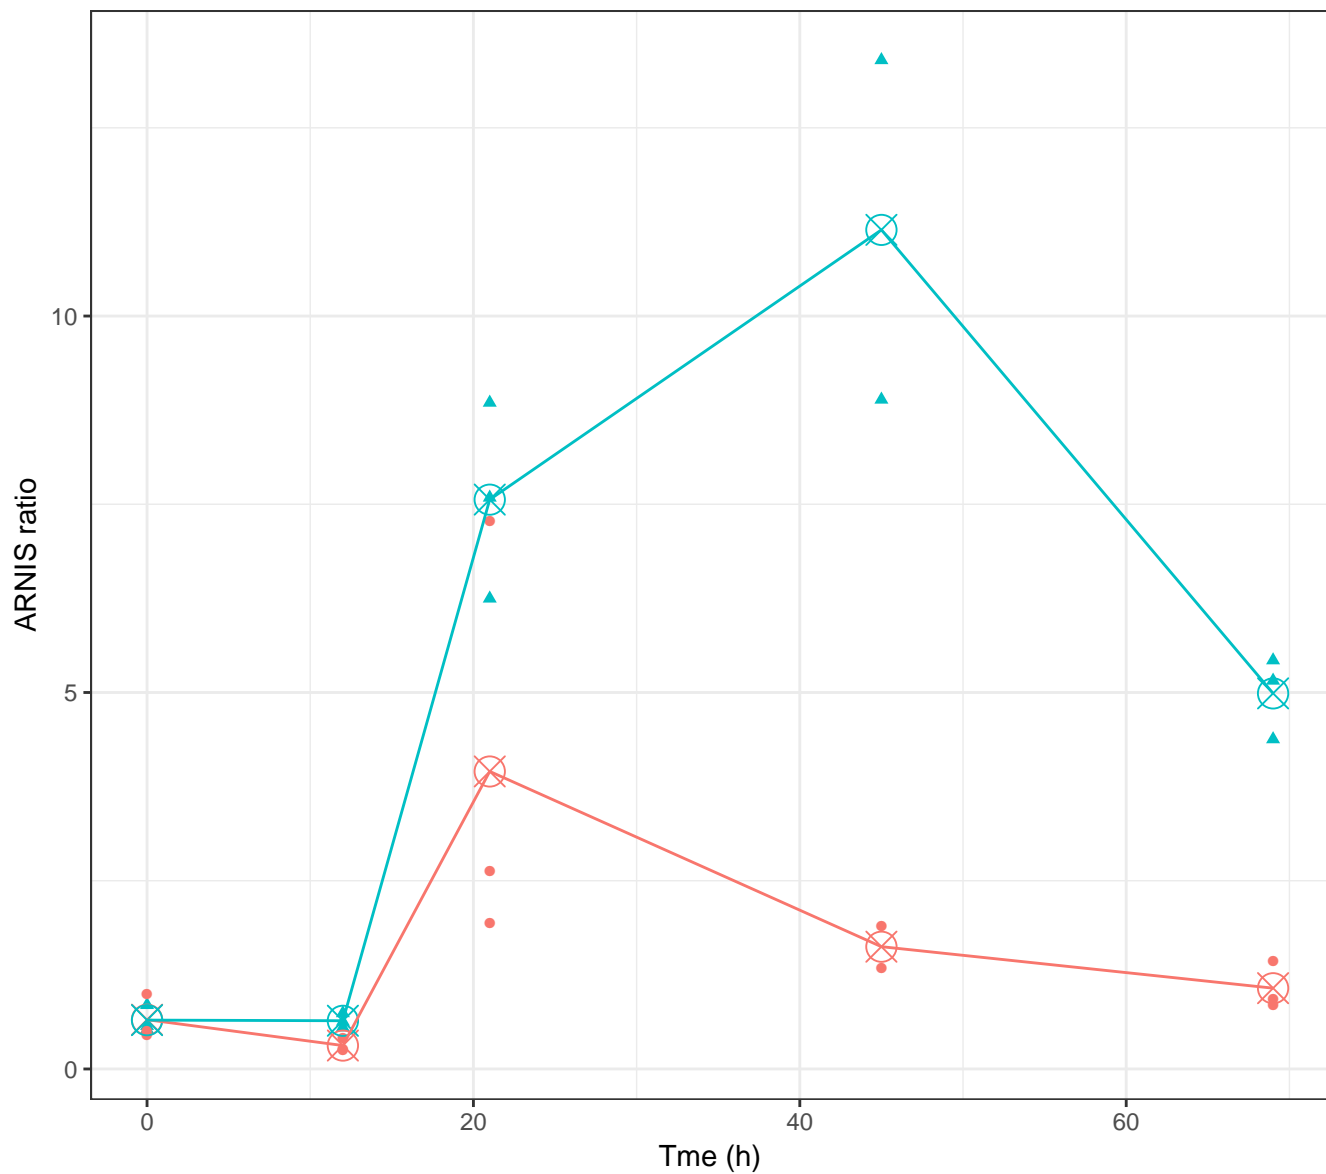

# OTU.1\_Actinobacteria\_clade\_acl\_A6

Treatment ⊗ Control ⊗ Filtered-1micron

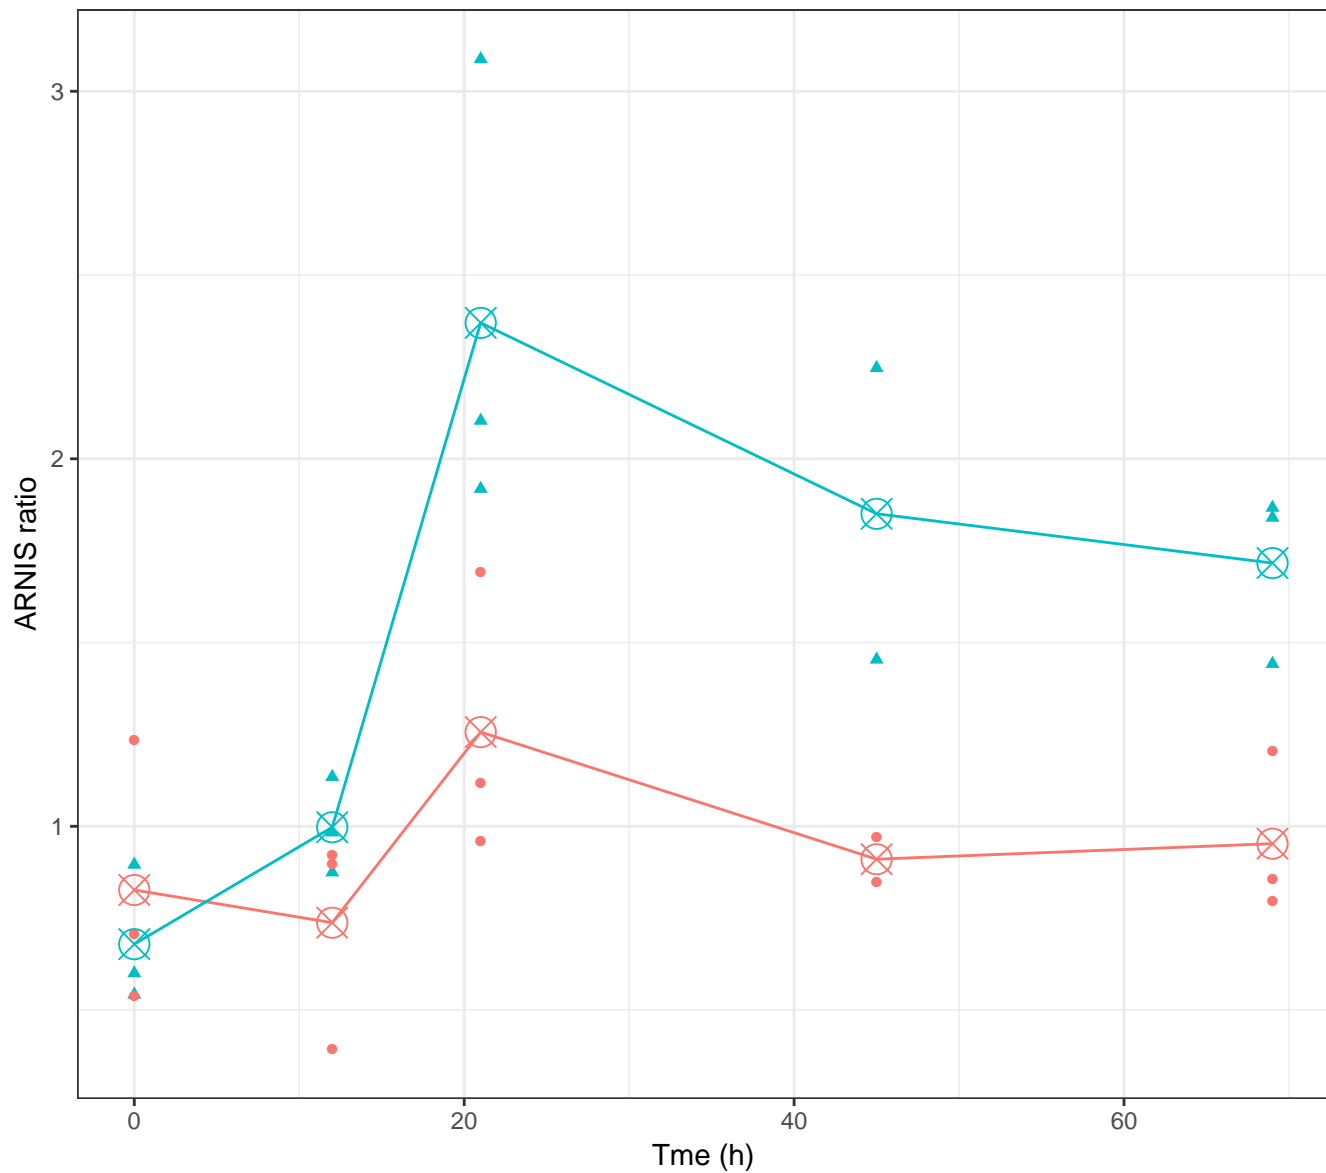

# OTU.18\_Betaproteobacteria\_Limnohabitans

Treatment Control Filtered-1micron

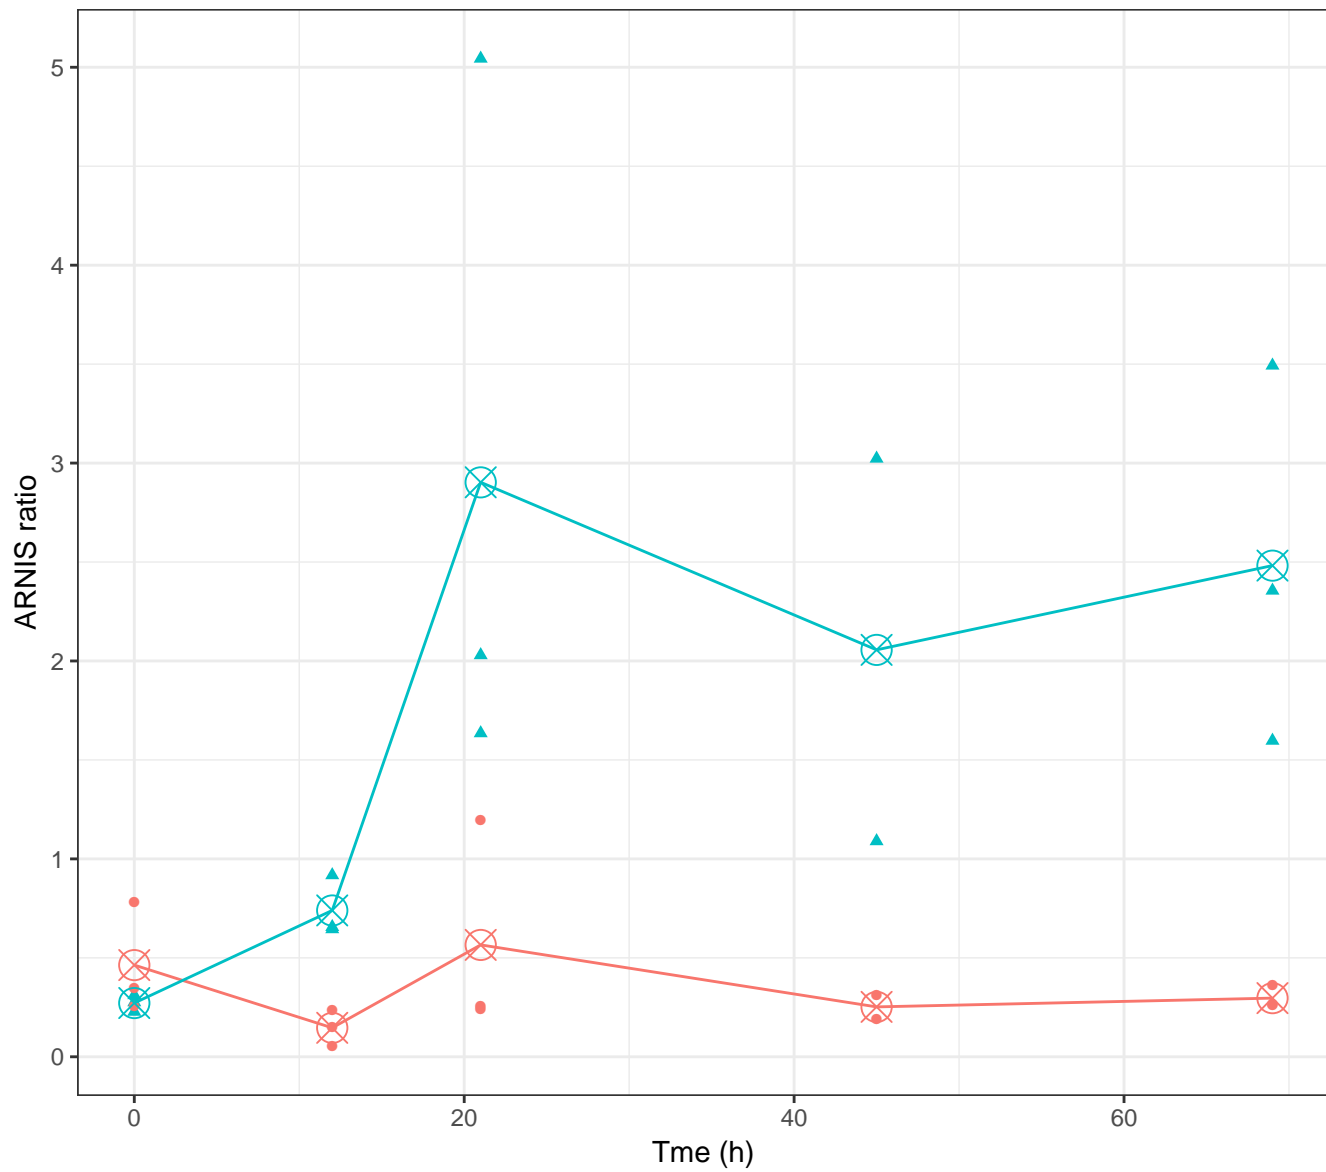

## OTU.25\_Betaproteobacteria\_Methylopumilus\_planktonicus\_LD28

Treatment Control Filtered-1micron

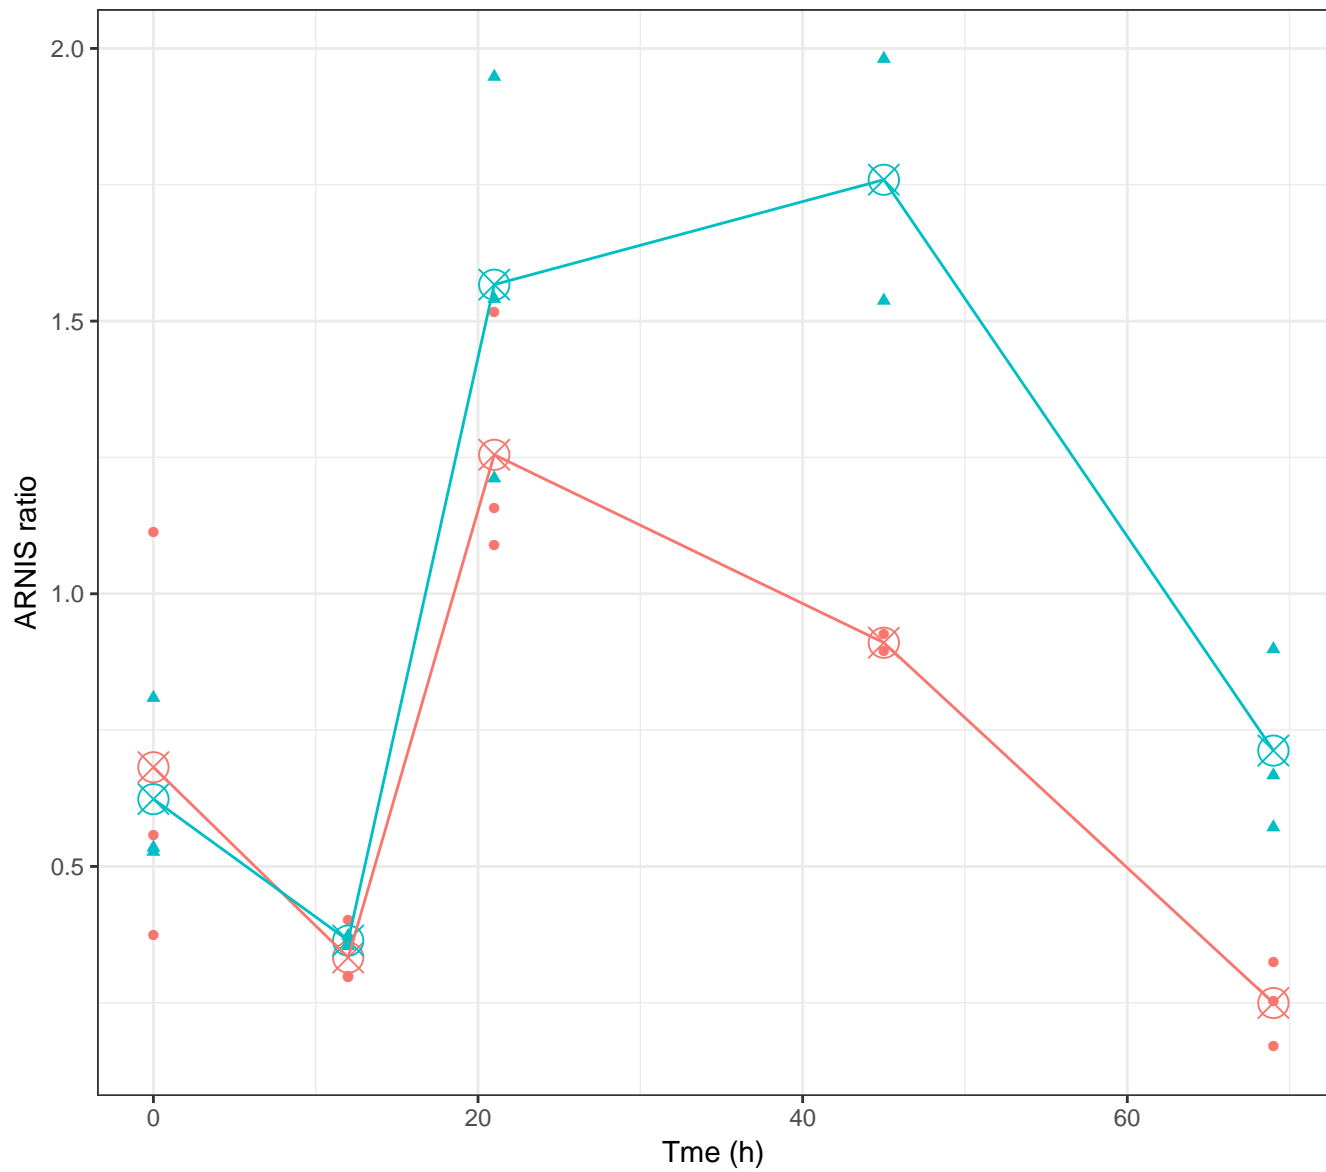

# OTU.60\_Bacteroidetes\_Candidatus\_Aquirestis

Treatment  Control  Filtered-1micron

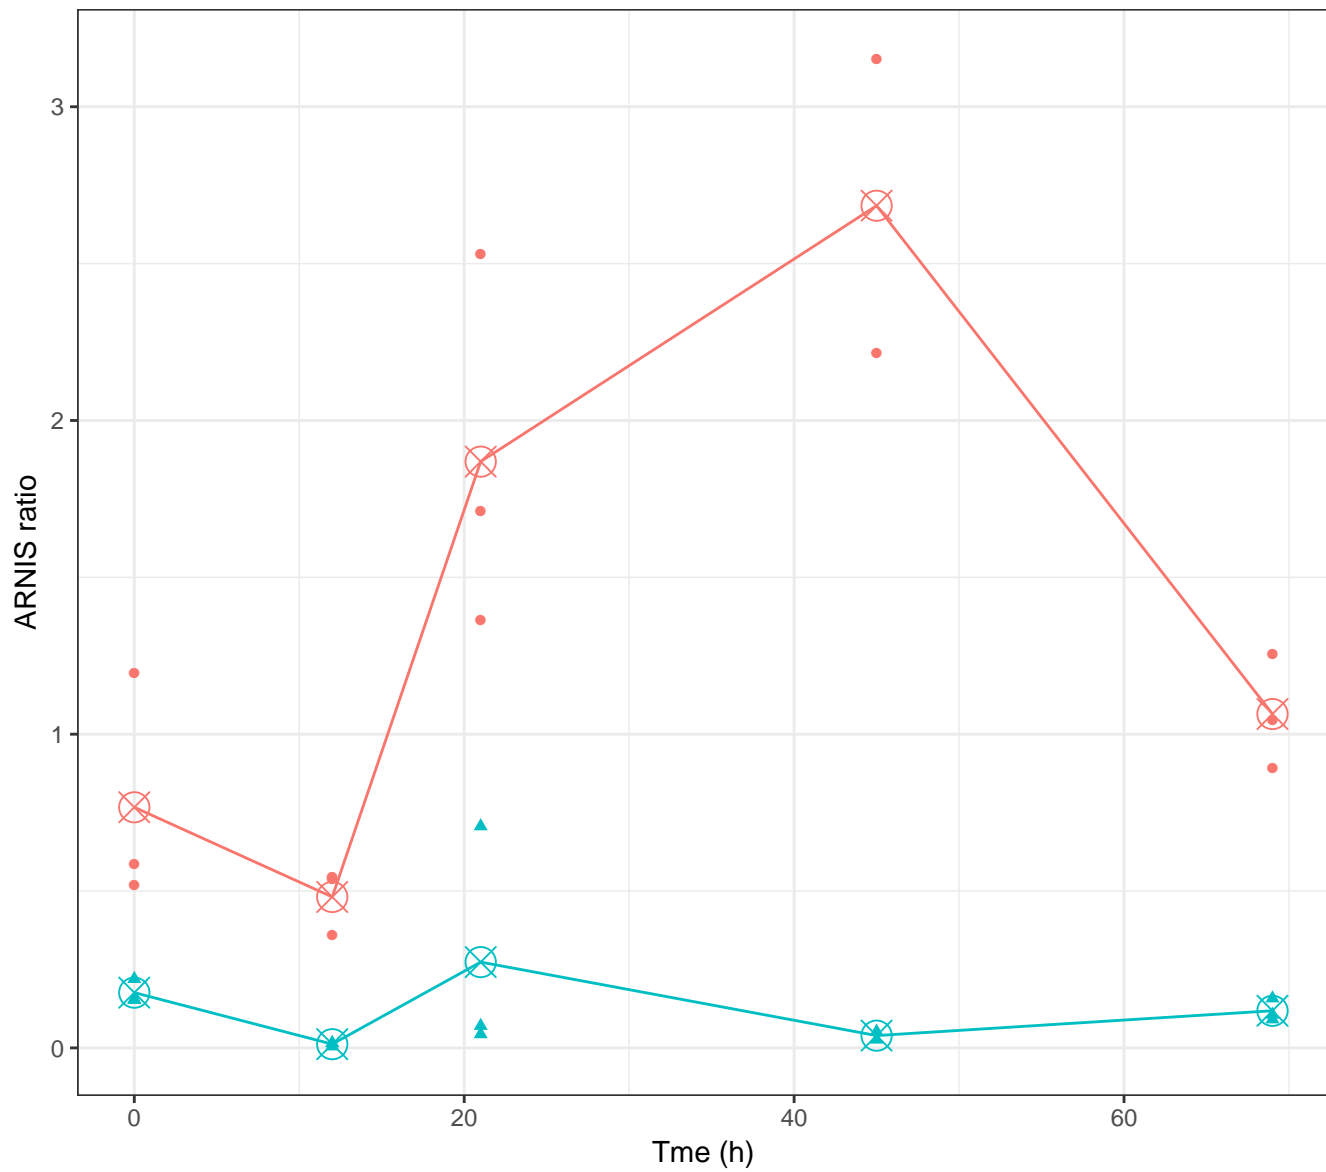



## OTU.38\_Verrucomicrobia\_Prostheco bacter

Treatment Control Filtered-1micron

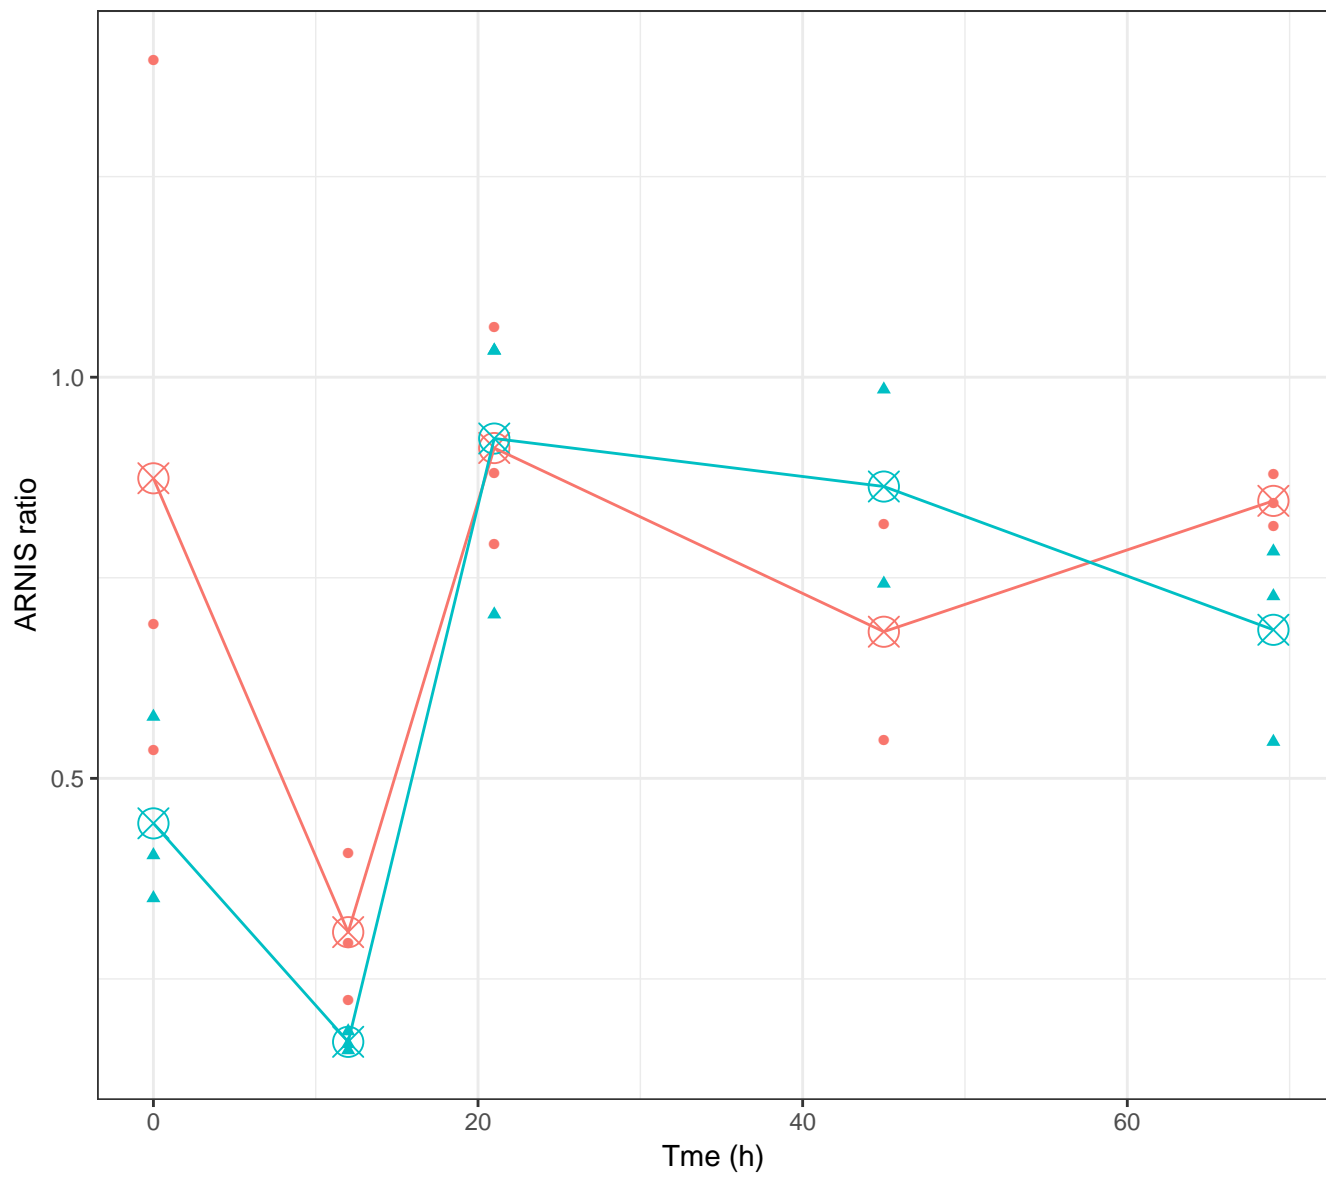

# OTU.5065\_Actinobacteria\_Candidatus\_Planktophila

Treatment ⊗ Control ⊗ Filtered-1micron

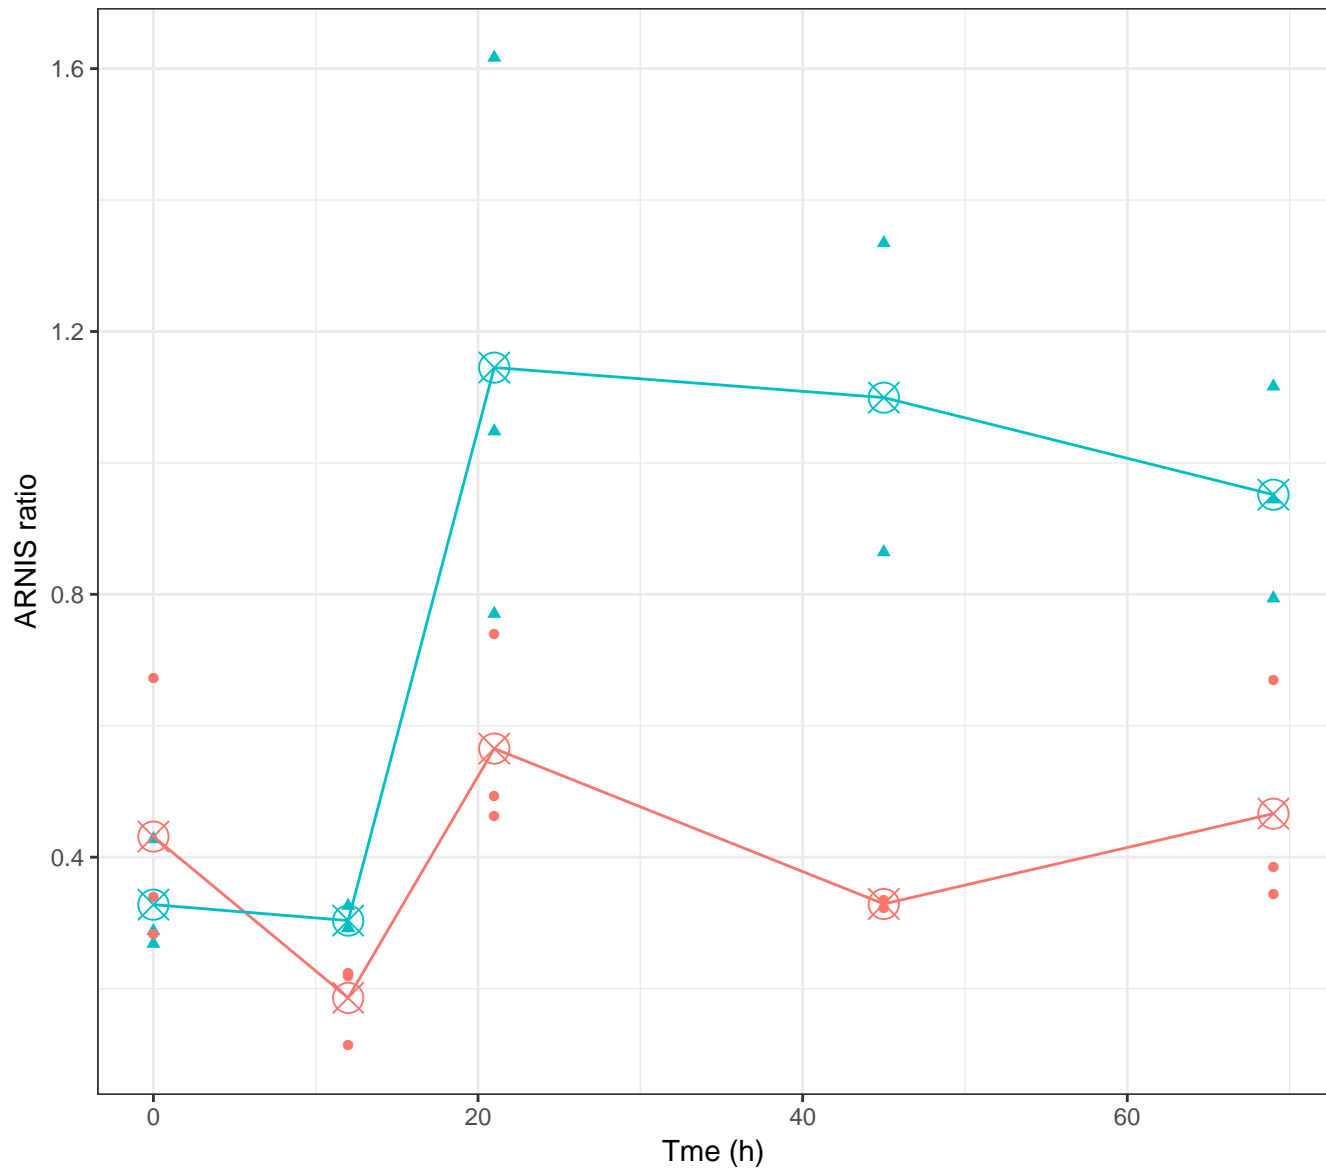

## OTU.42\_Bacteroidetes\_Fluviicola

Treatment Control Filtered-1micron

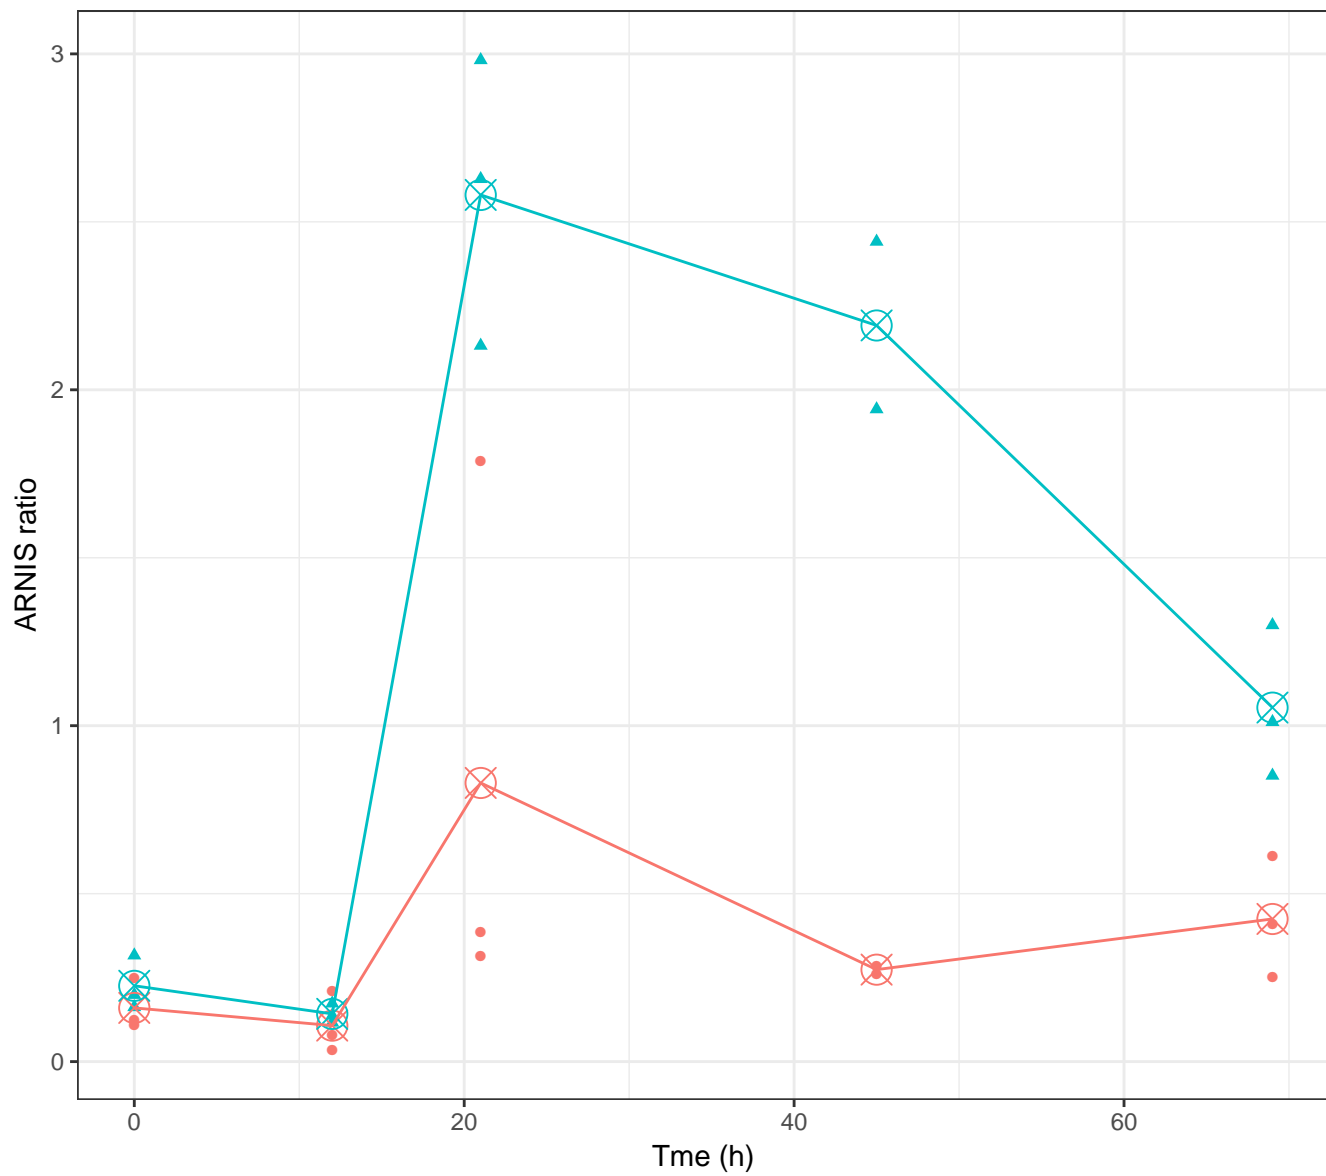

## OTU.44\_Betaproteobacteria\_Nitrosomonadaceae

Treatment Control Filtered-1micron

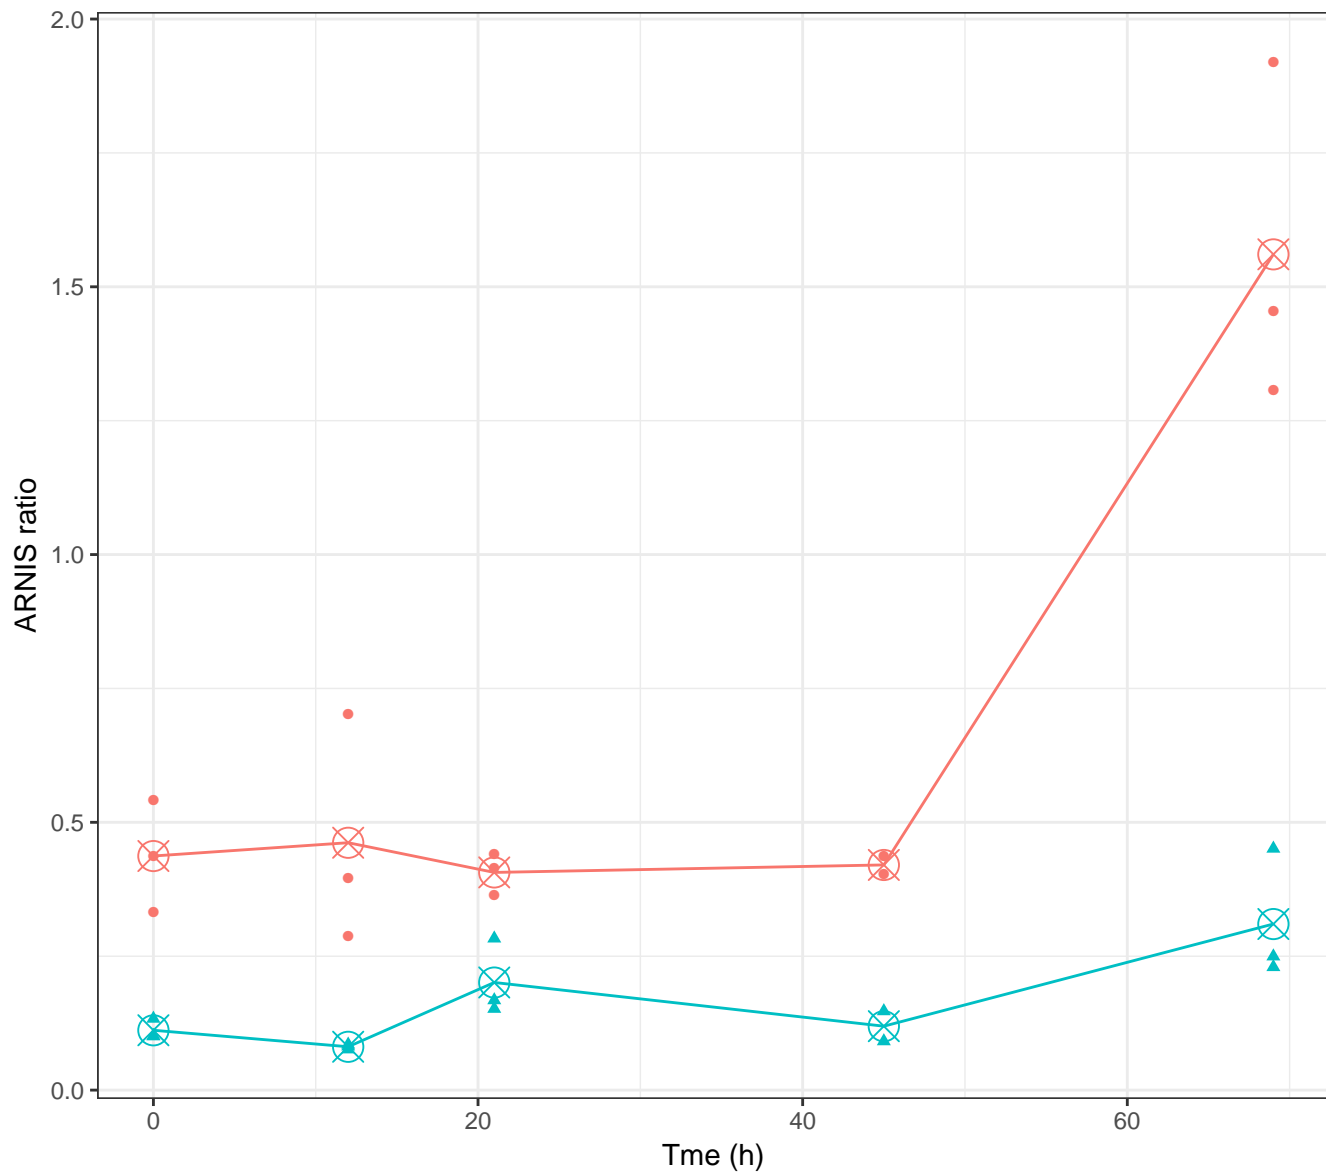

## OTU.244\_Betaproteobacteria\_Polynucleobacter

Treatment Control Filtered-1micron

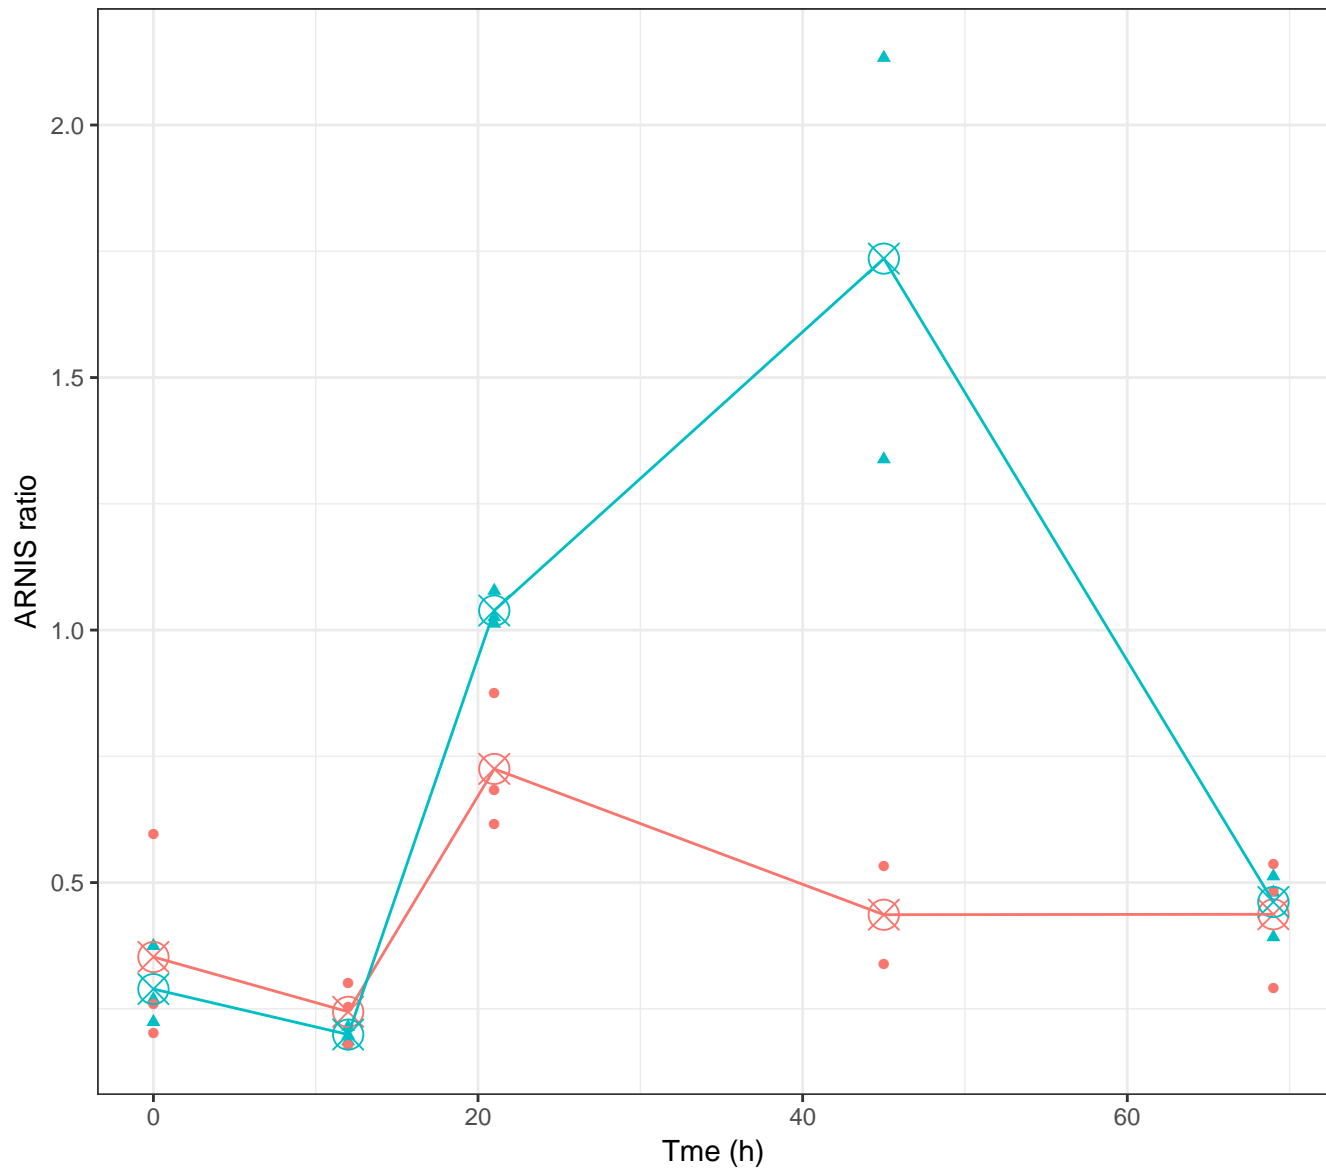

# OTU.48\_Bacteroidetes\_Flavobacterium

Treatment  Control  Filtered-1micron

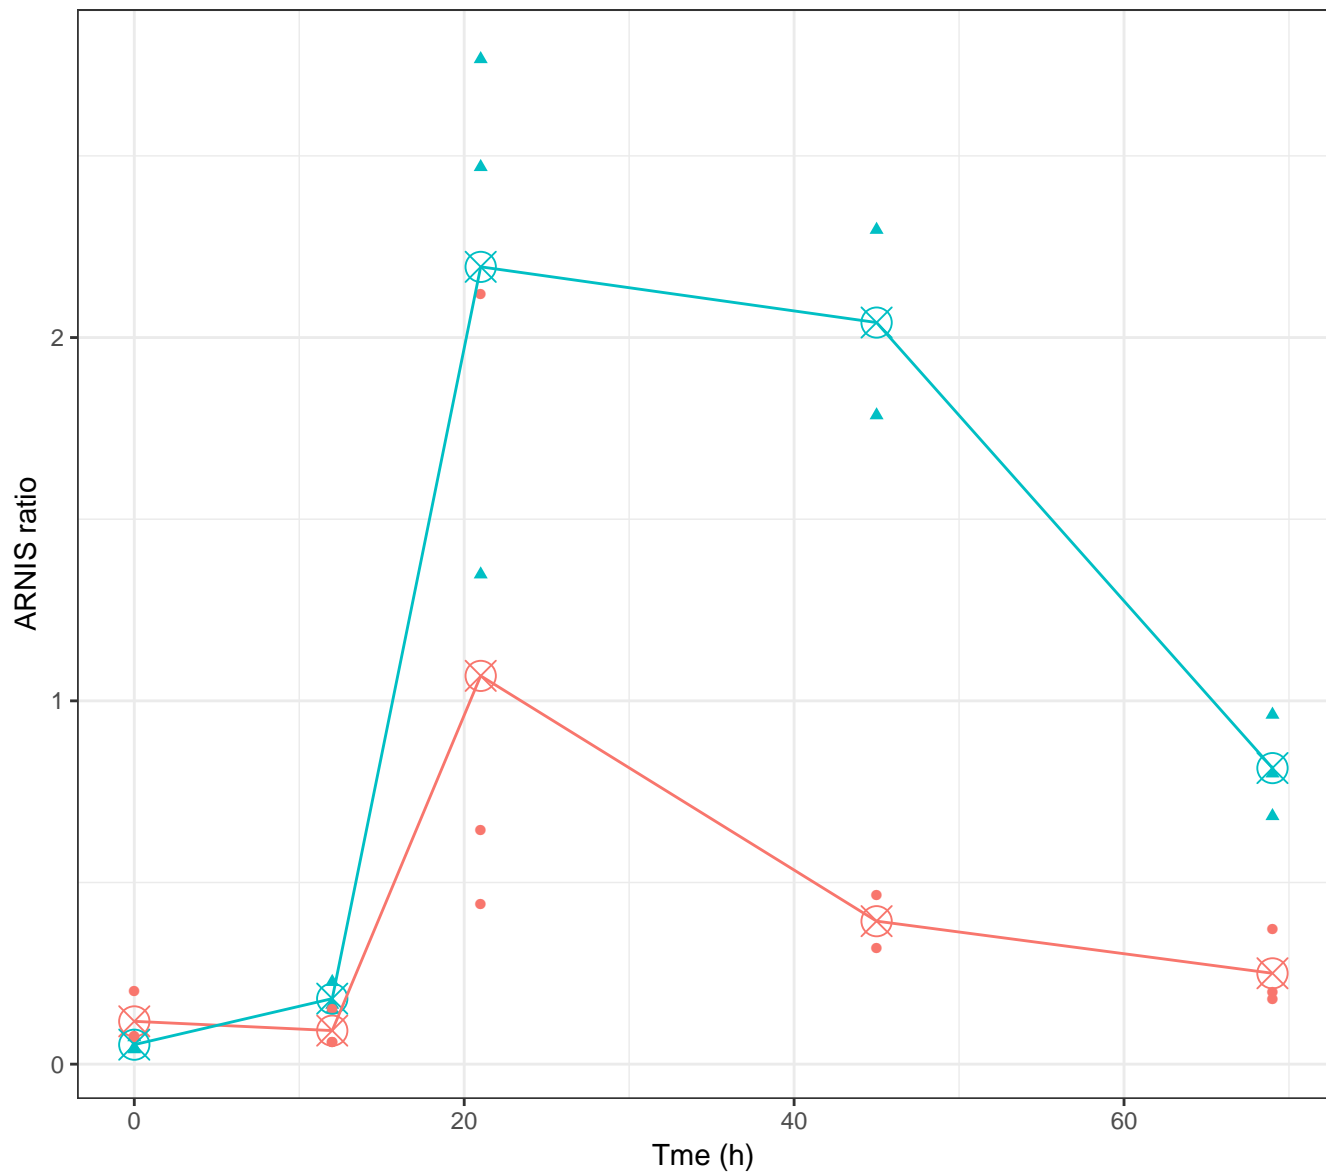

## OTU.51\_Verrucomicrobia\_FukuN18\_freshwater\_group

Treatment  Control  Filtered-1micron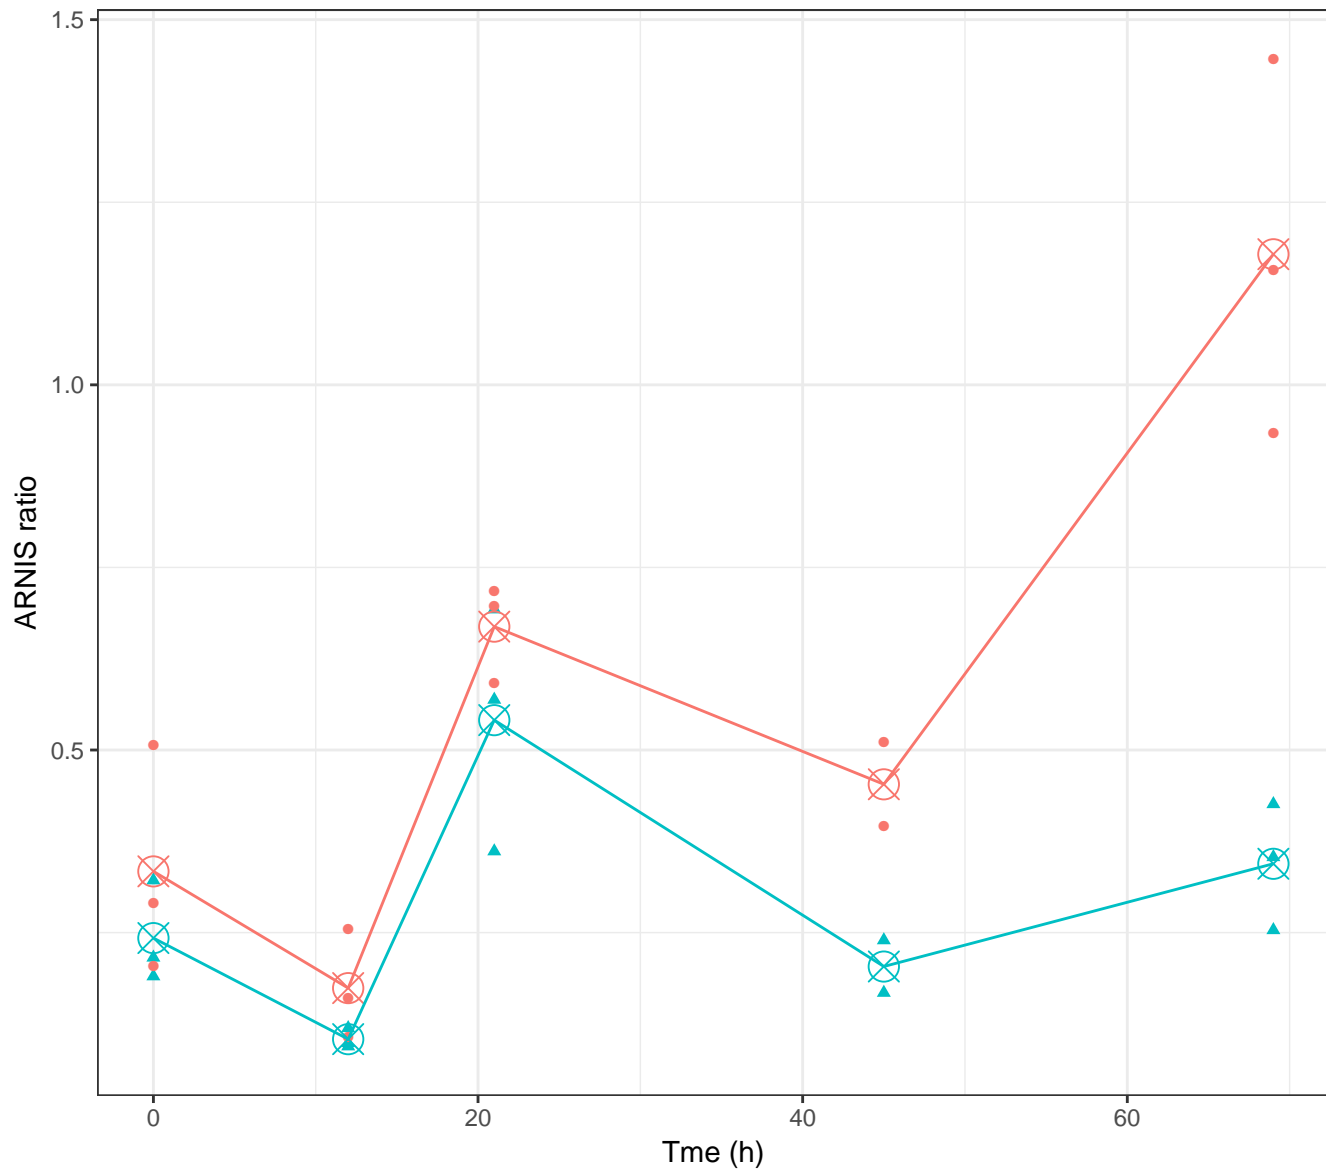

## OTU.10\_Betaproteobacteria\_Polynucleobacter

Treatment Control Filtered-1micron

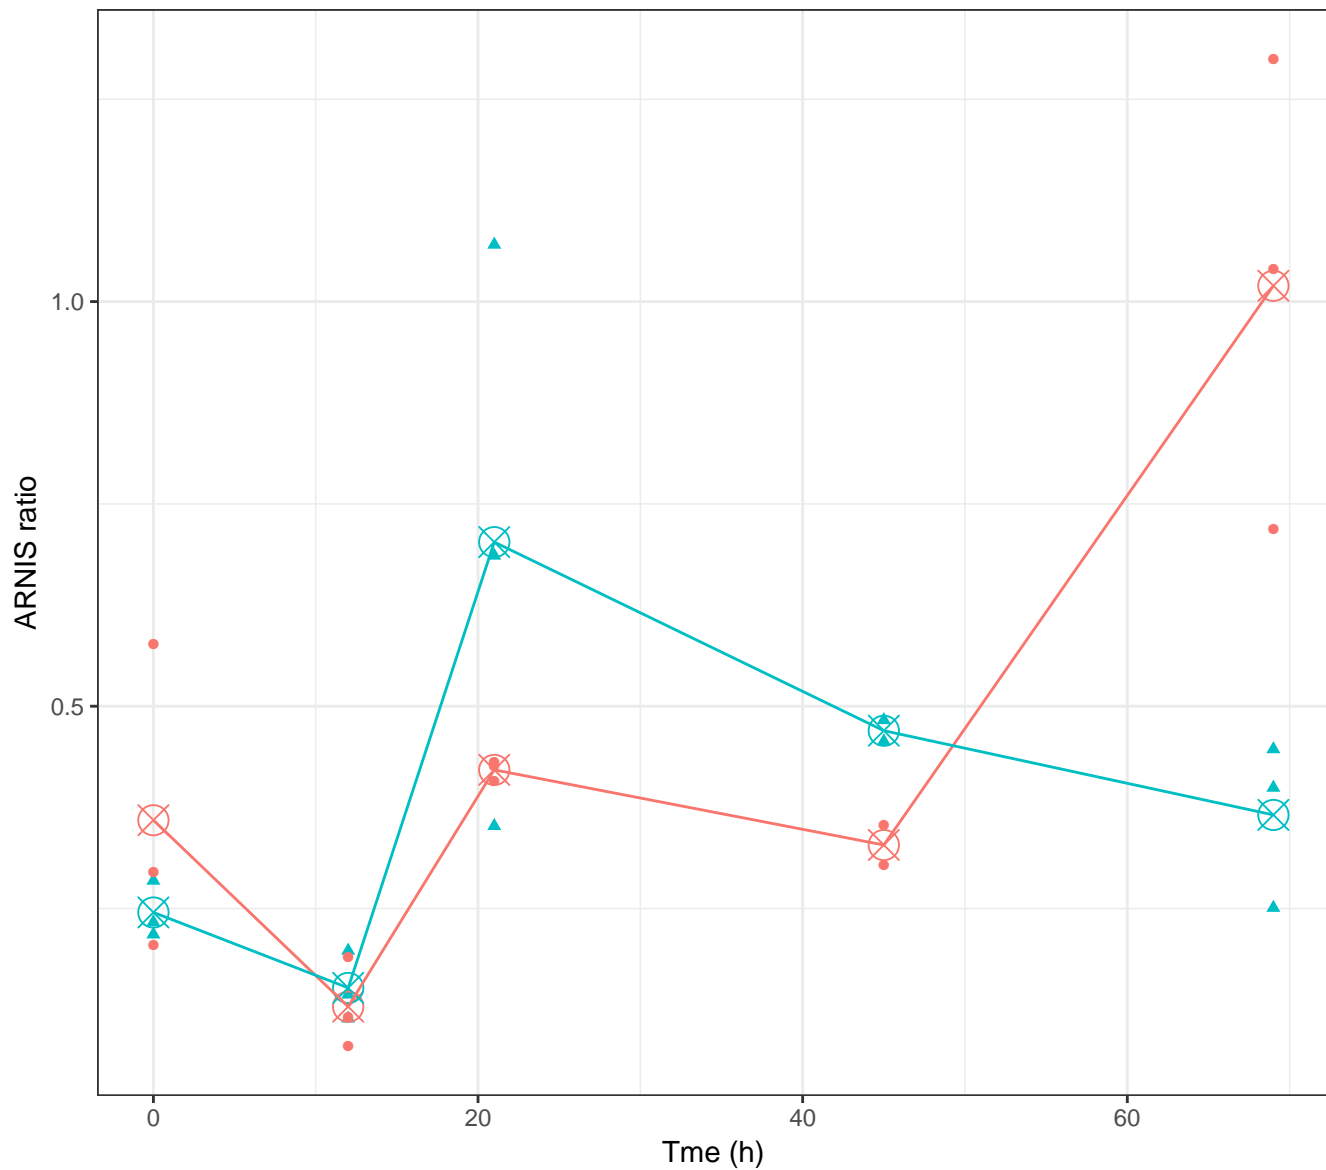



## OTU.62\_Bacteroidetes\_Saprospiraceae

Treatment  Control  Filtered-1micron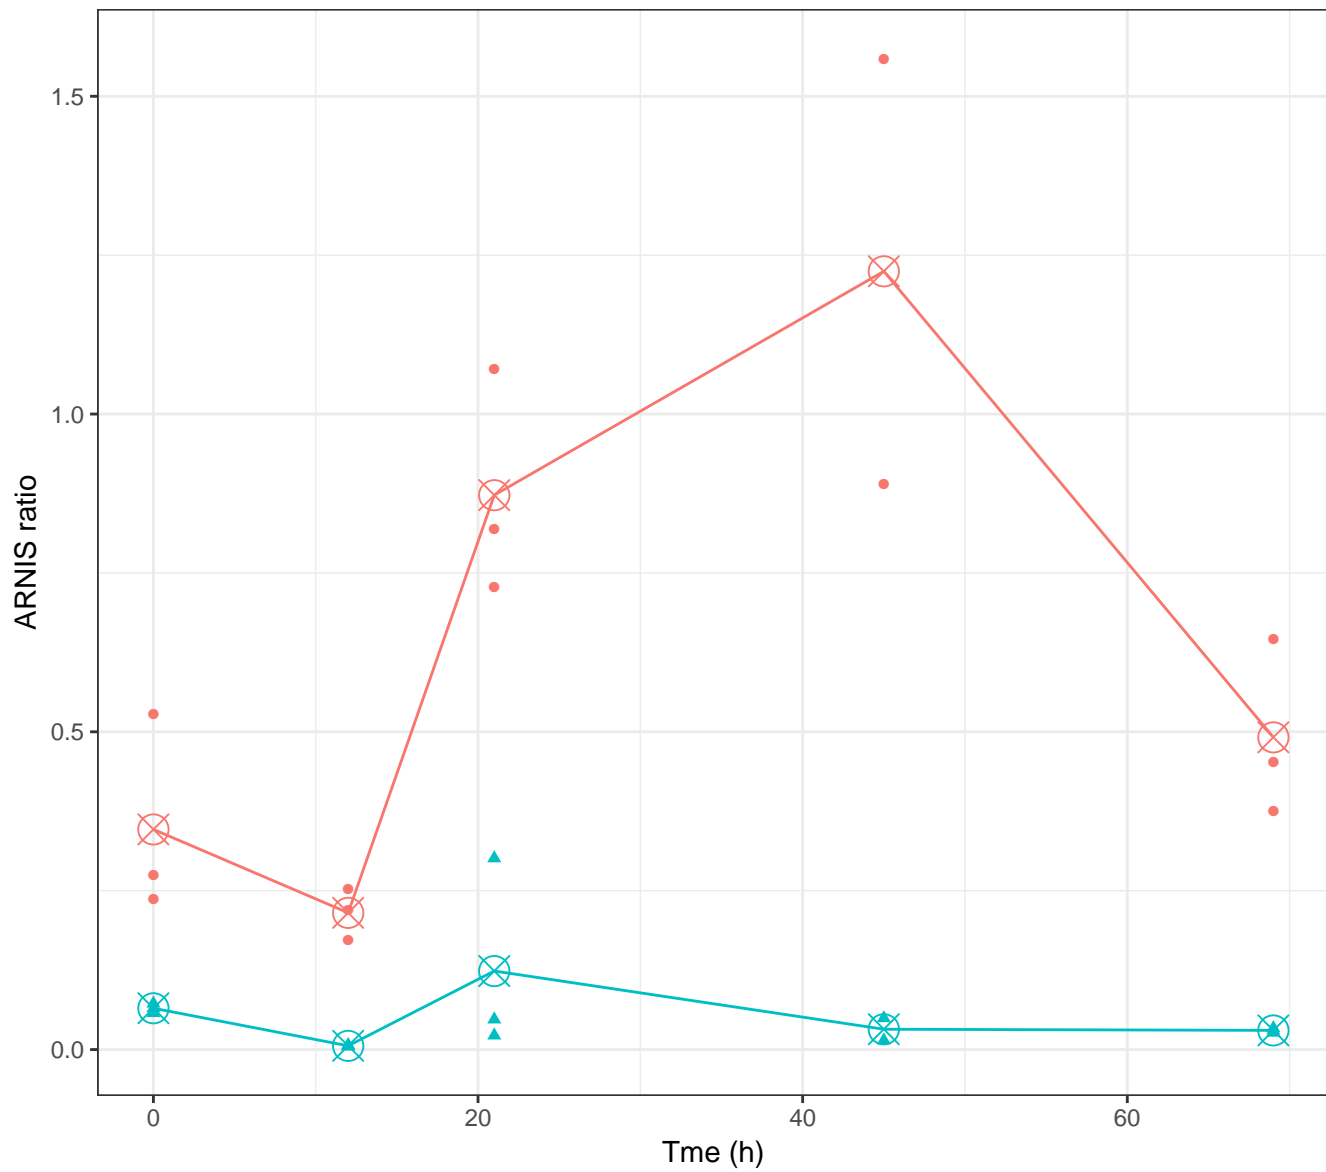

# OTU.65\_Planctomycetes\_Planctomycetaceae

Treatment  Control  Filtered-1micron

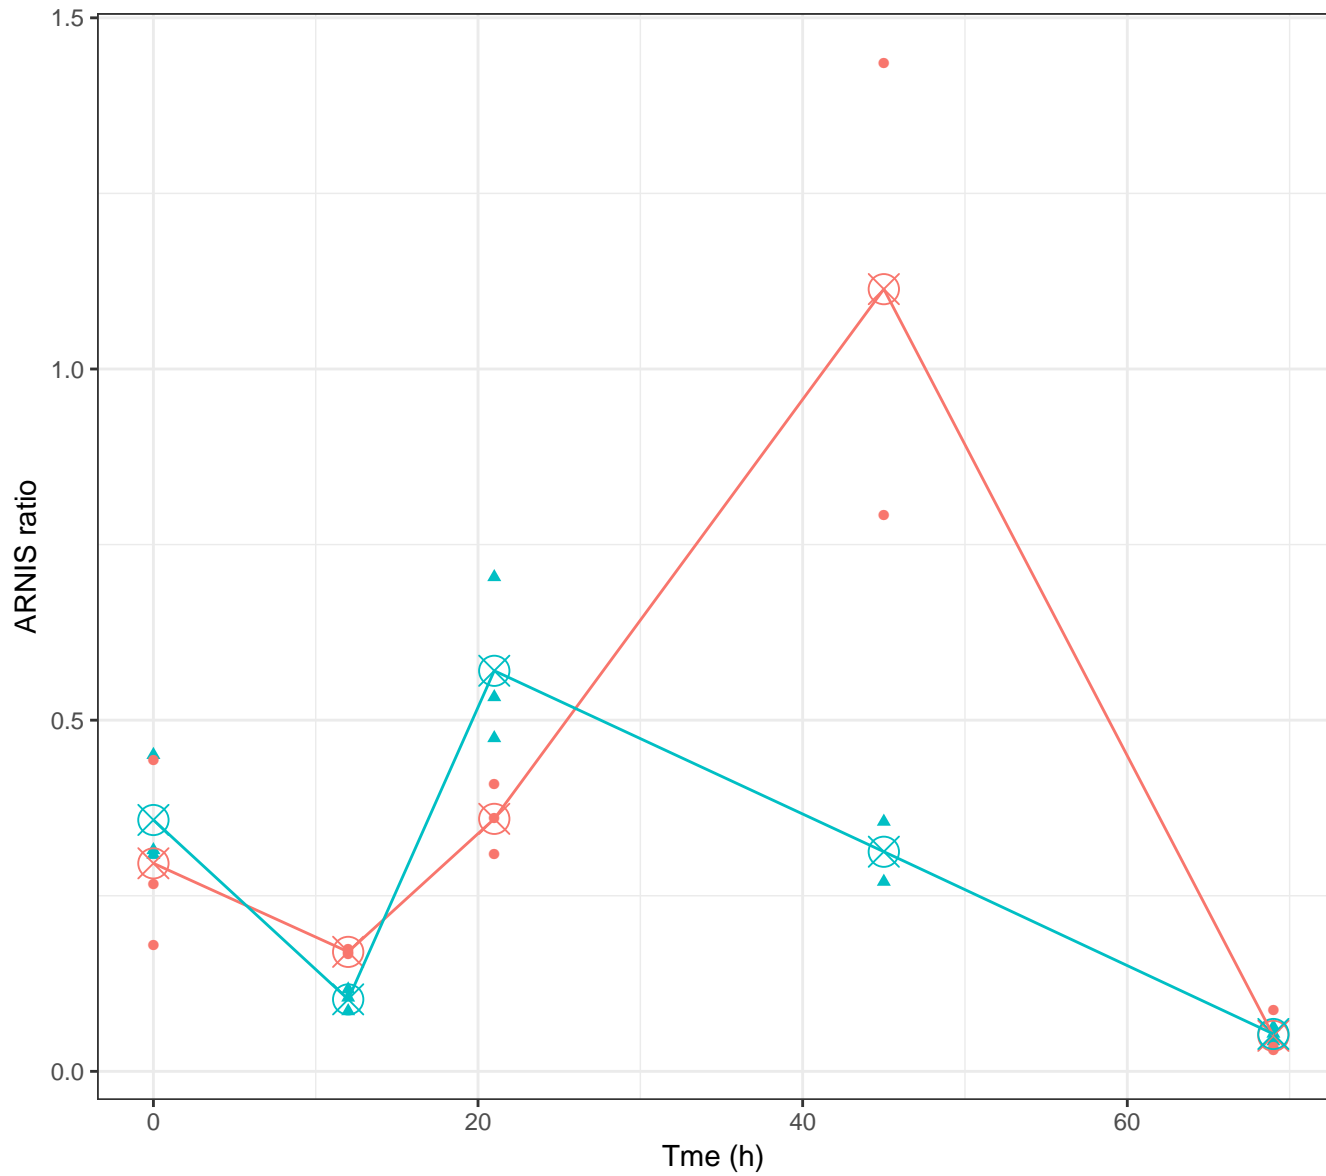

## OTU.15\_Actinobacteria\_clade\_acSTL

Treatment Control Filtered-1micron

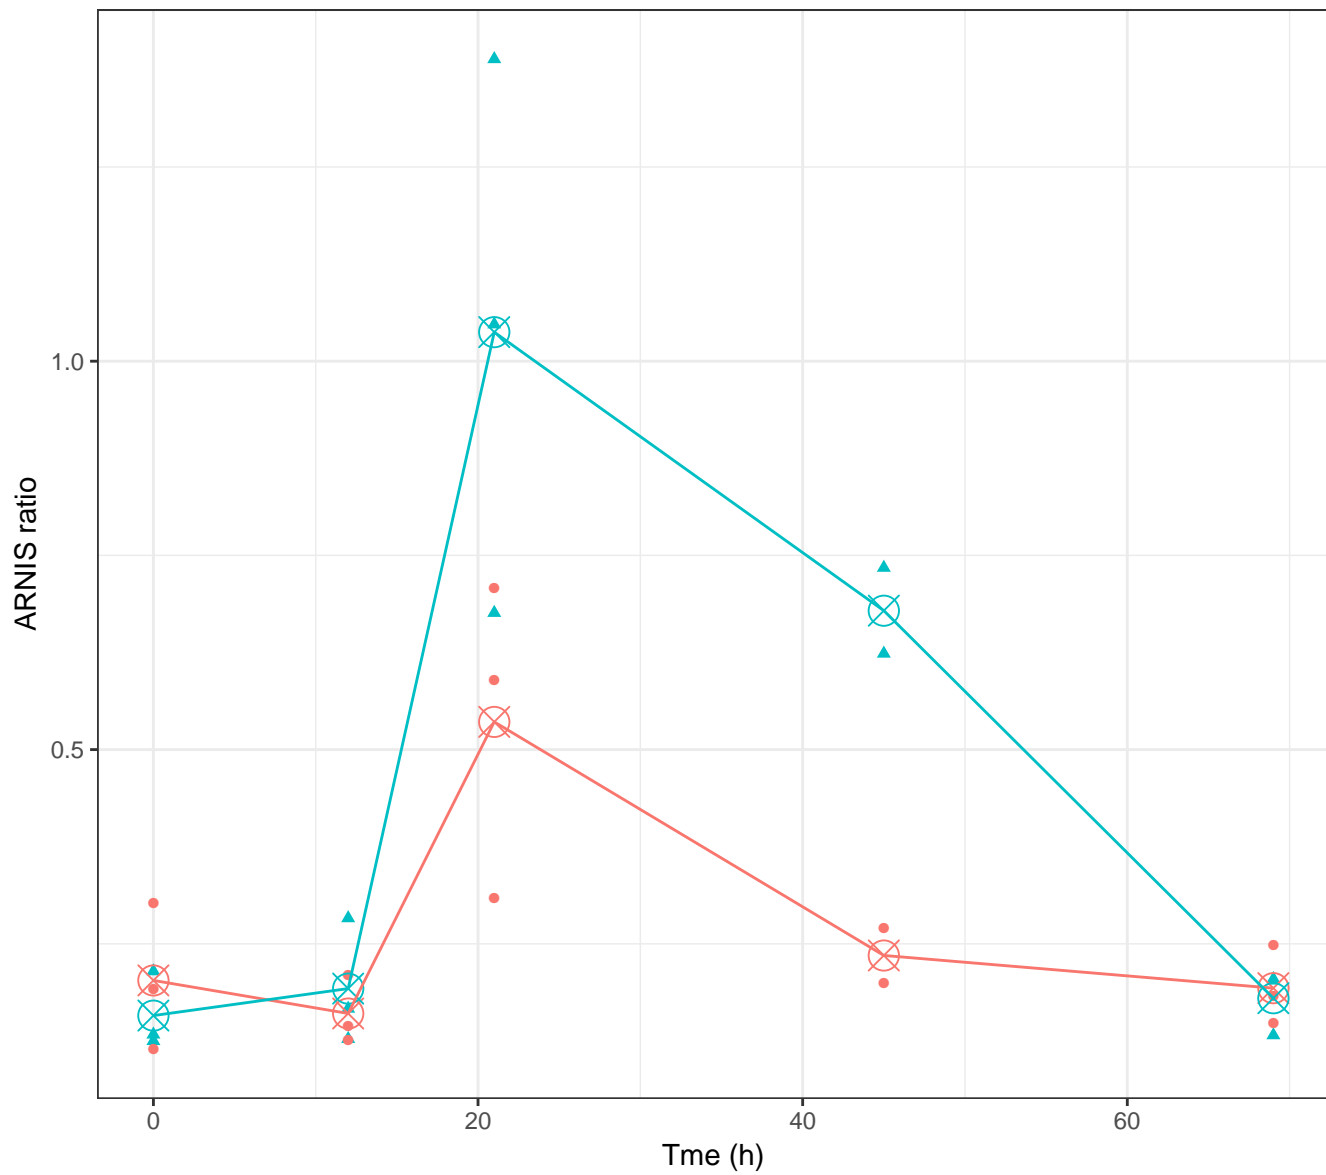

## OTU.37\_Bacteroidetes\_Algoriphagus

Treatment Control Filtered-1micron

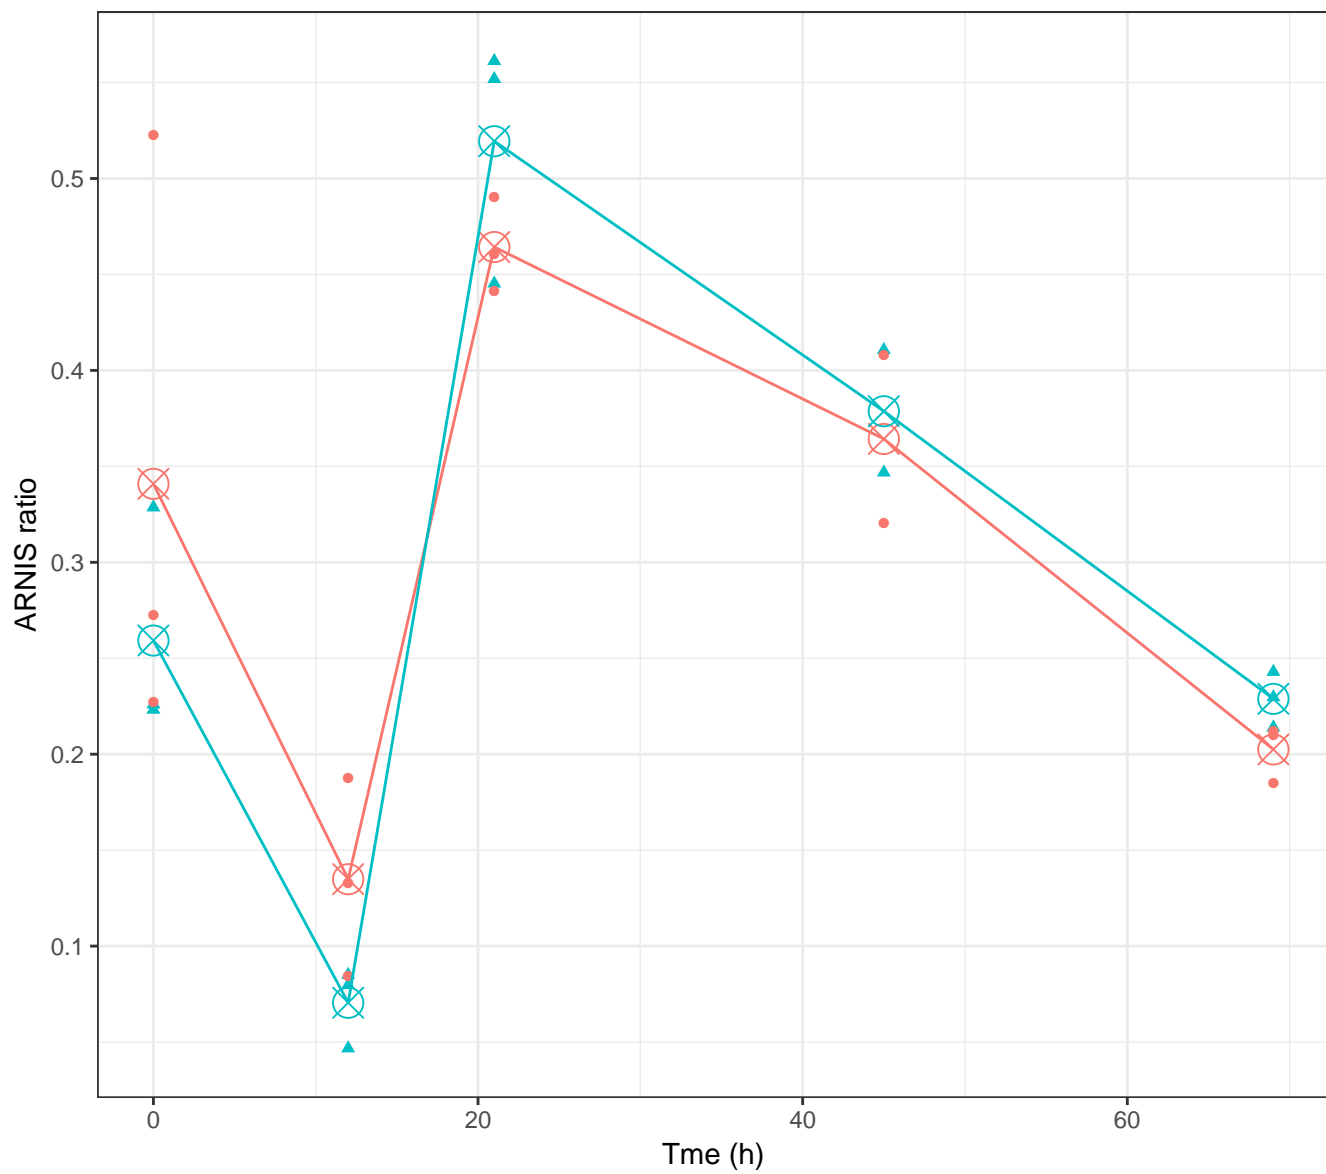

## OTU.28\_Verrucomicrobia\_Opitutae\_vadinHA64

Treatment  Control  Filtered-1micron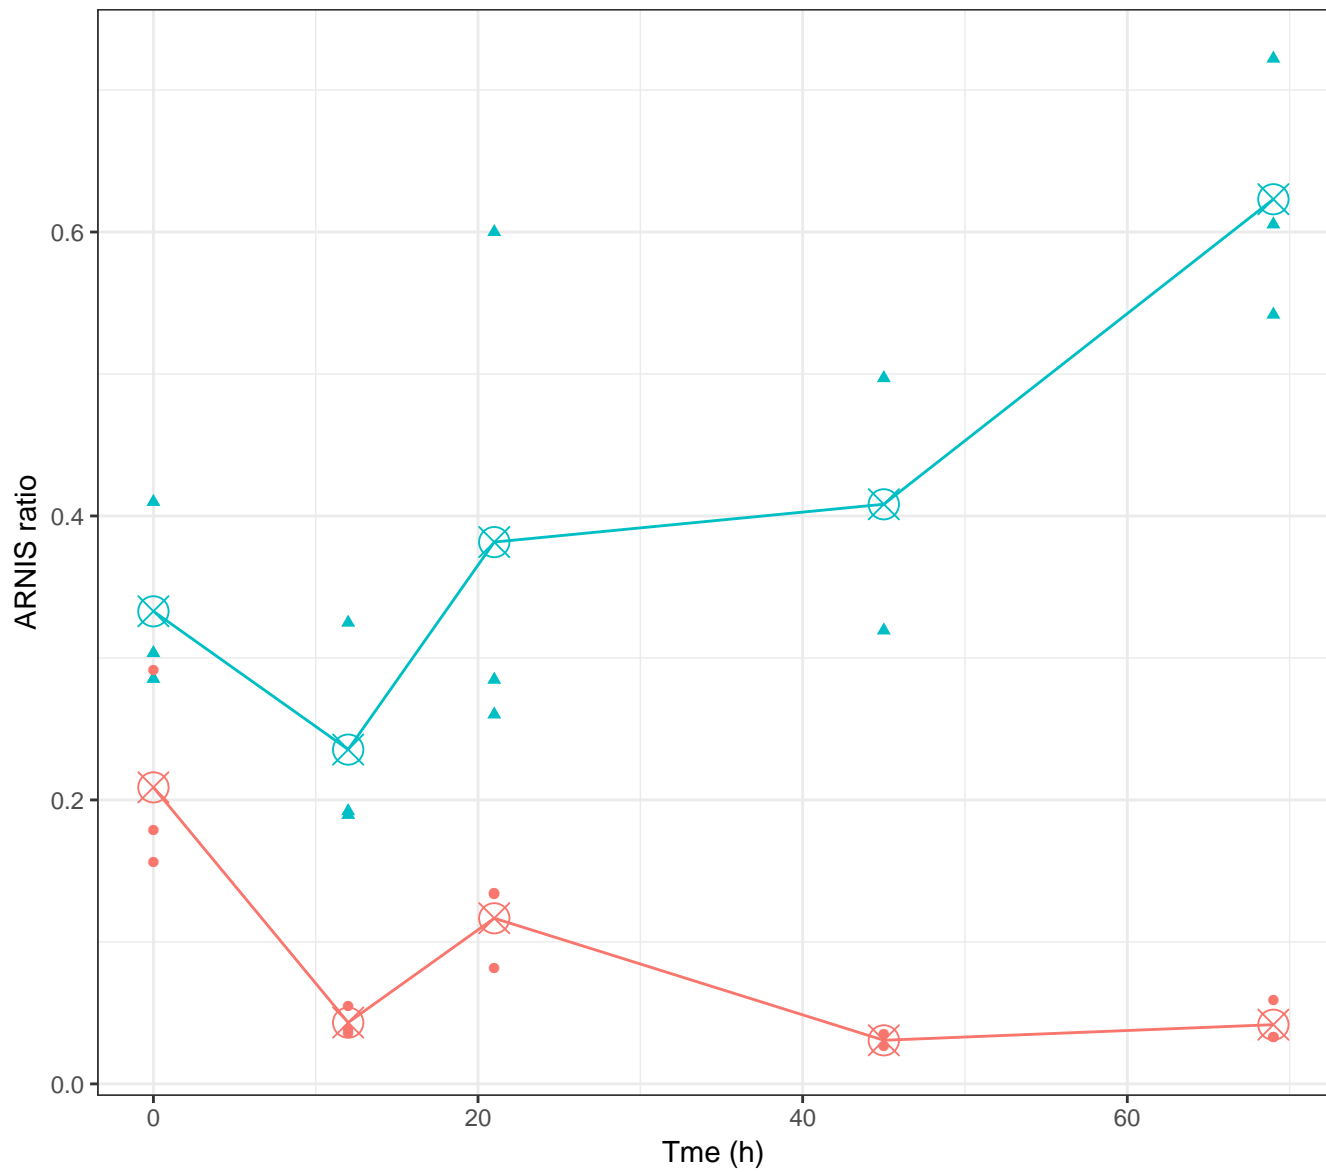

## OTU.383\_Betaproteobacteria\_Albidiferax\_3

Treatment  Control  Filtered-1micron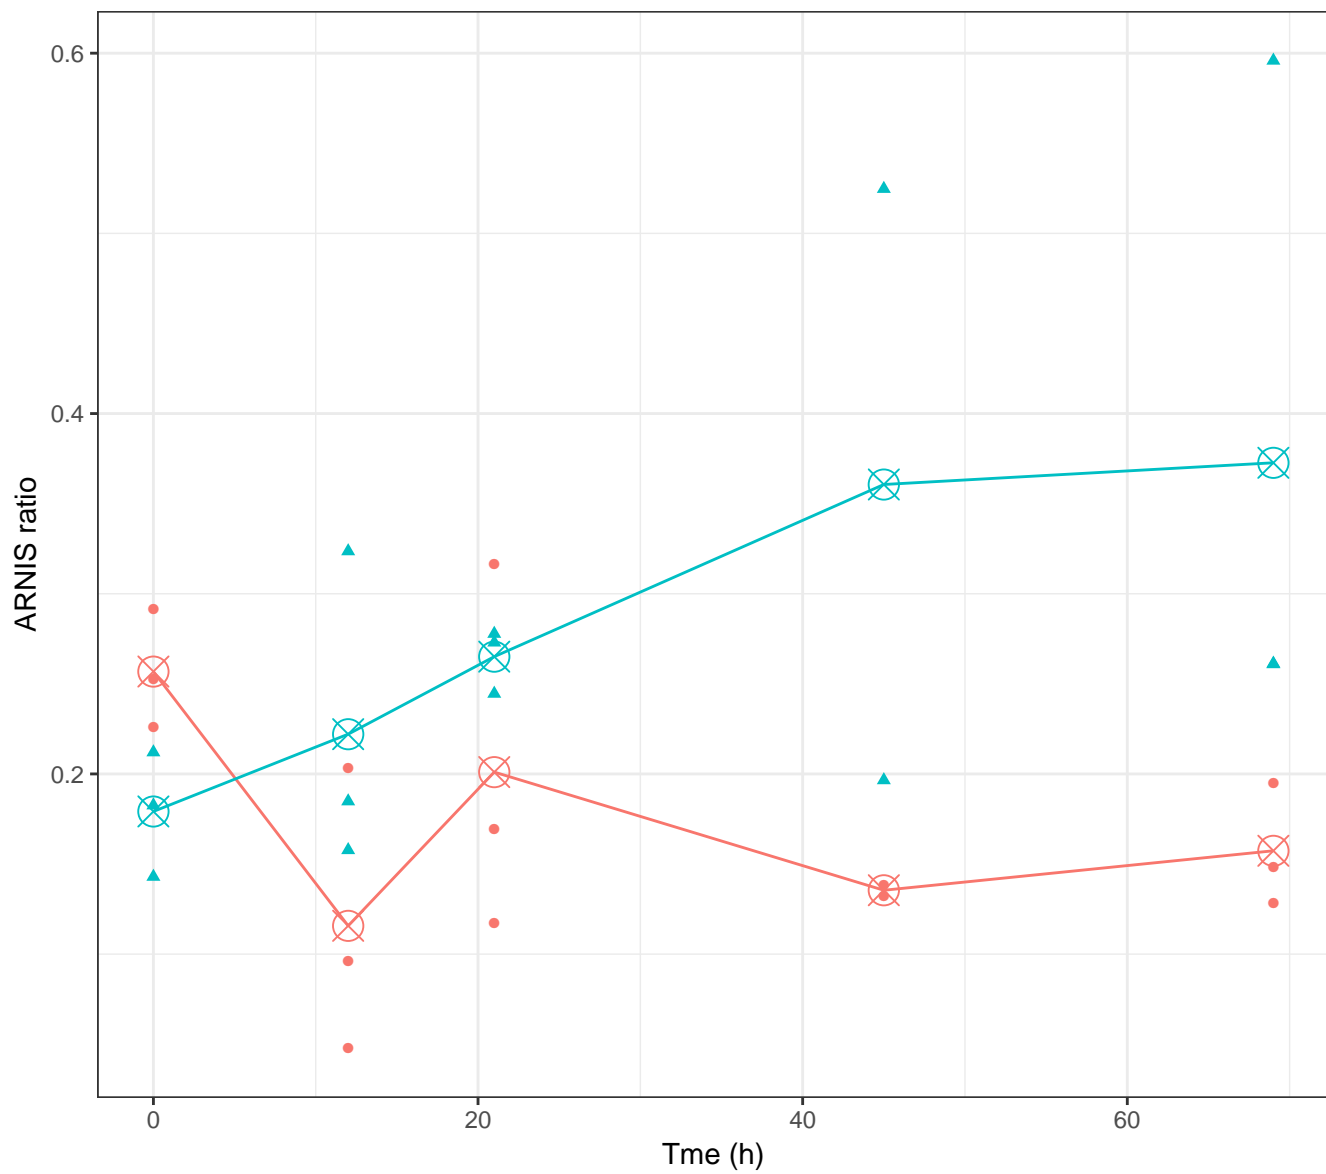

## OTU.5\_Actinobacteria\_Illumatobacter

Treatment Control Filtered-1micron

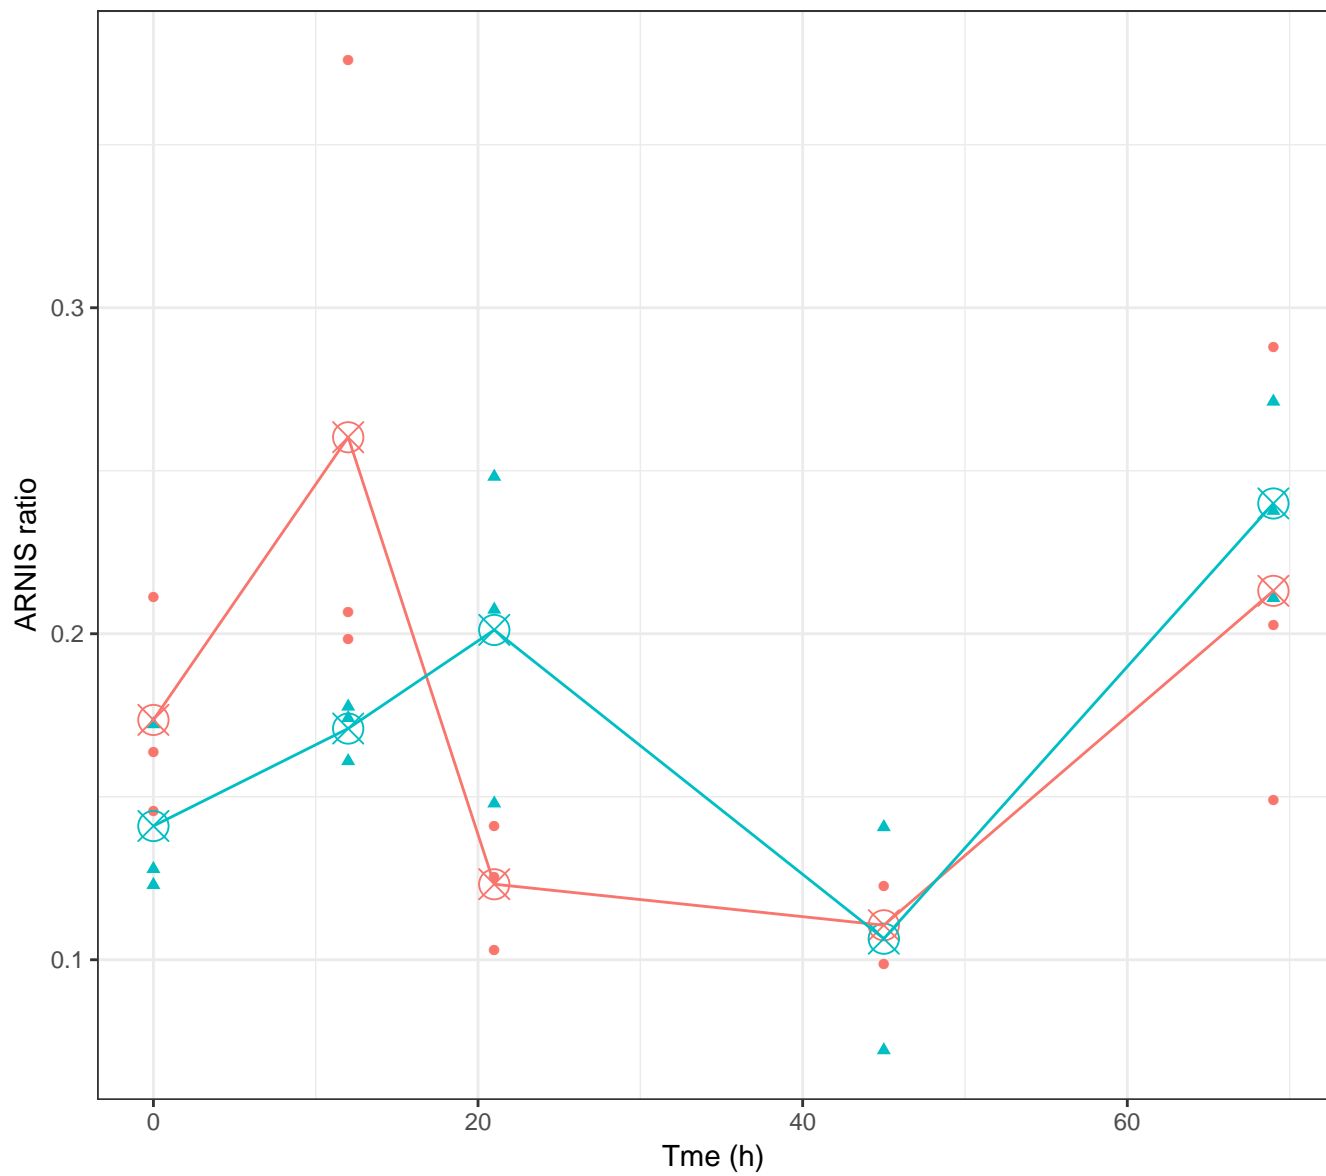

## OTU.16\_Actinobacteria\_clade\_acl\_A1

Treatment Control Filtered-1micron

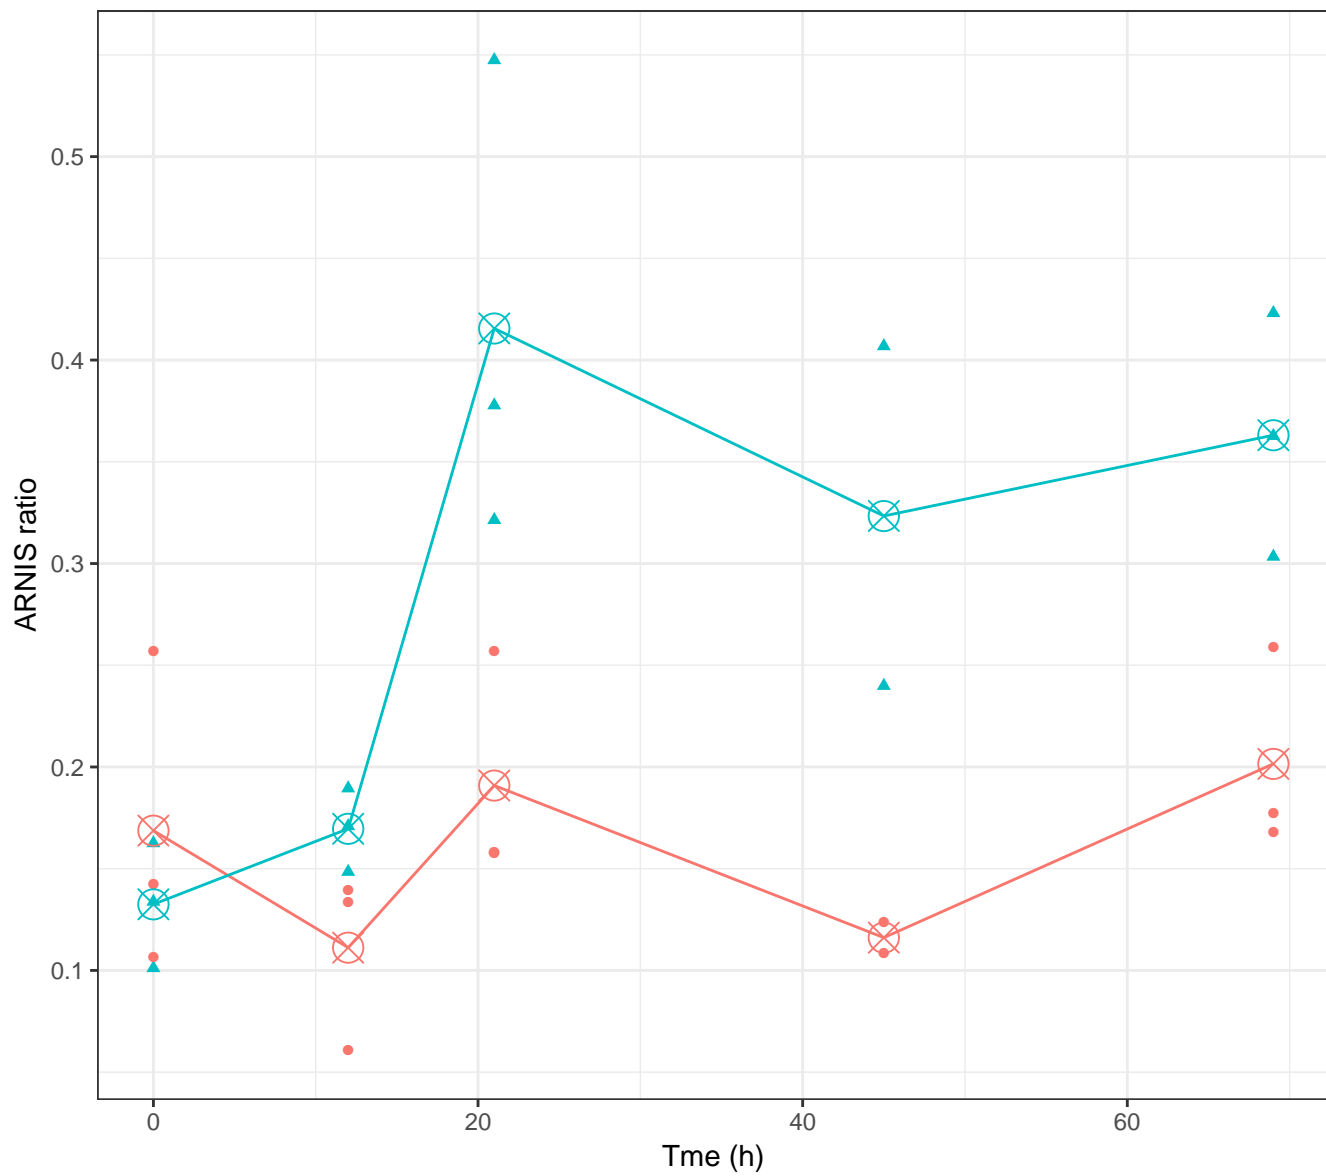



## OTU.17\_Bacteroidetes\_Fluviicola

Treatment Control Filtered-1micron

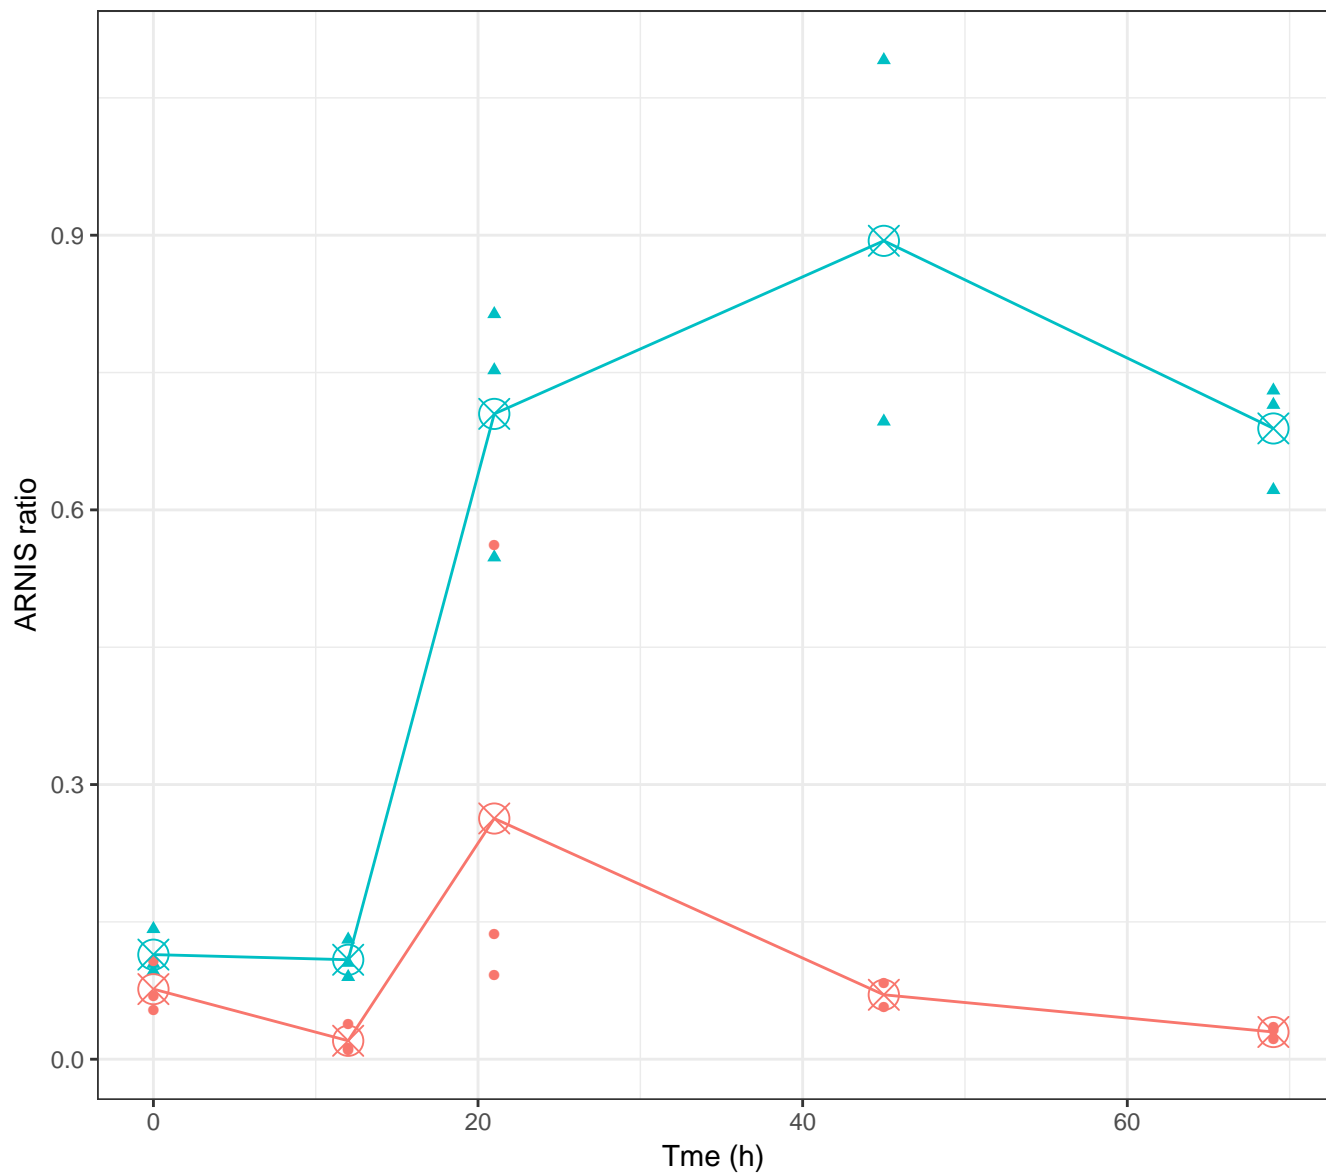

# OTU.14\_Bacteroidetes\_NS9\_marine\_group

Treatment ⊗ Control ⊗ Filtered-1micron

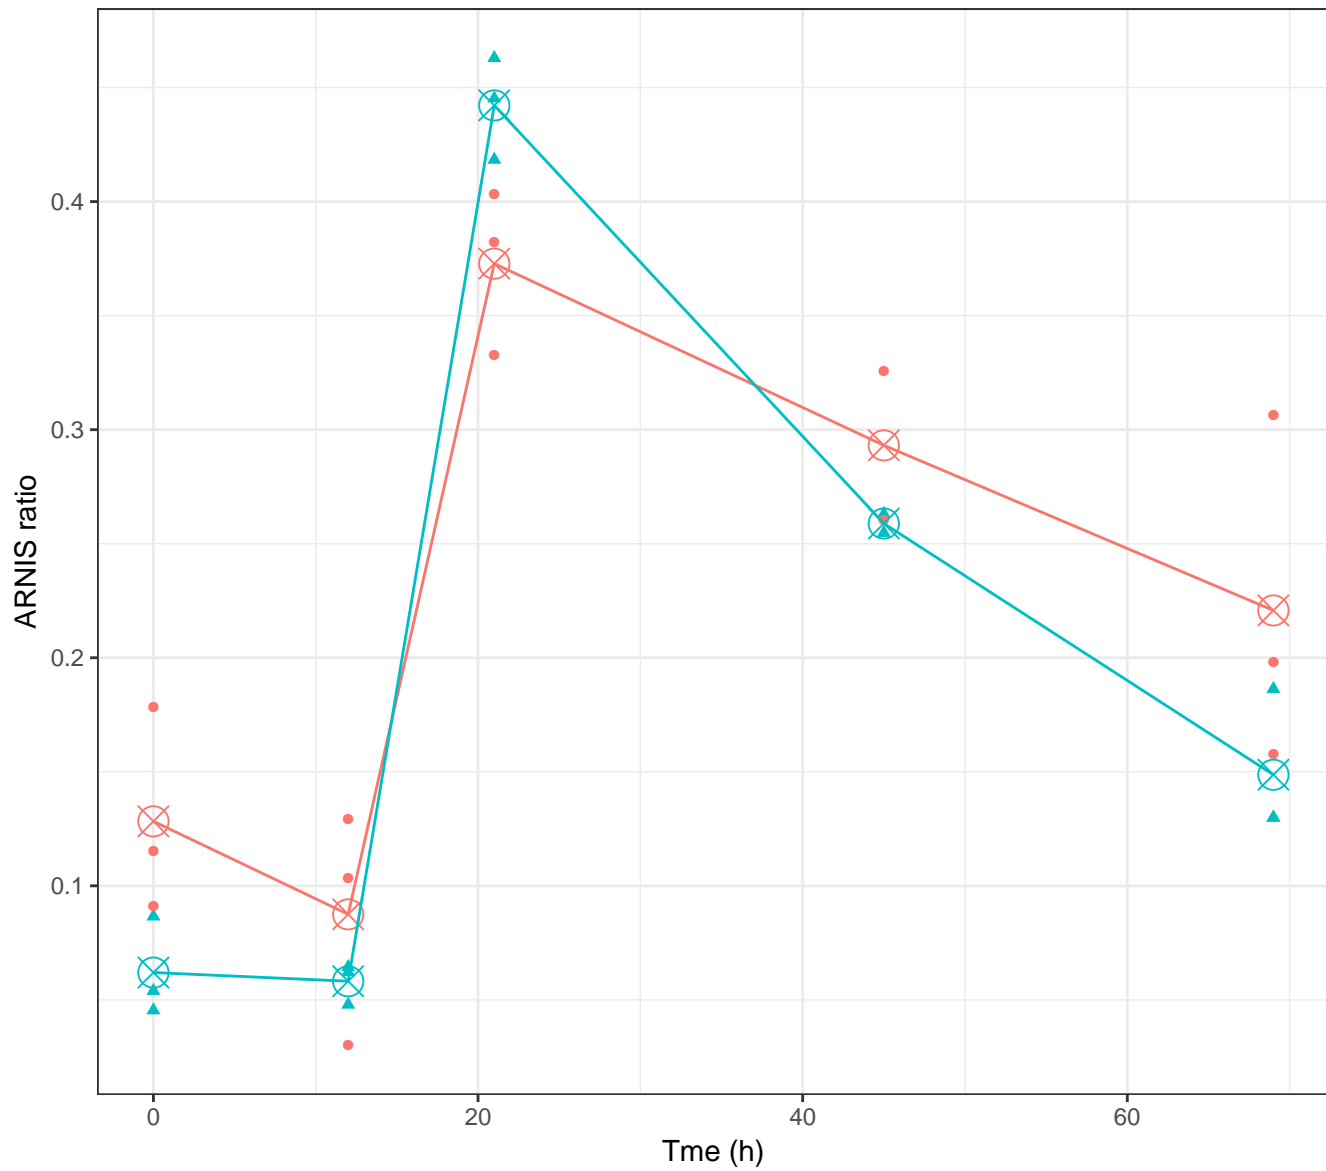

# OTU.85\_Bacteroidetes\_NS11\_12\_marine\_group

Treatment Control Filtered-1micron

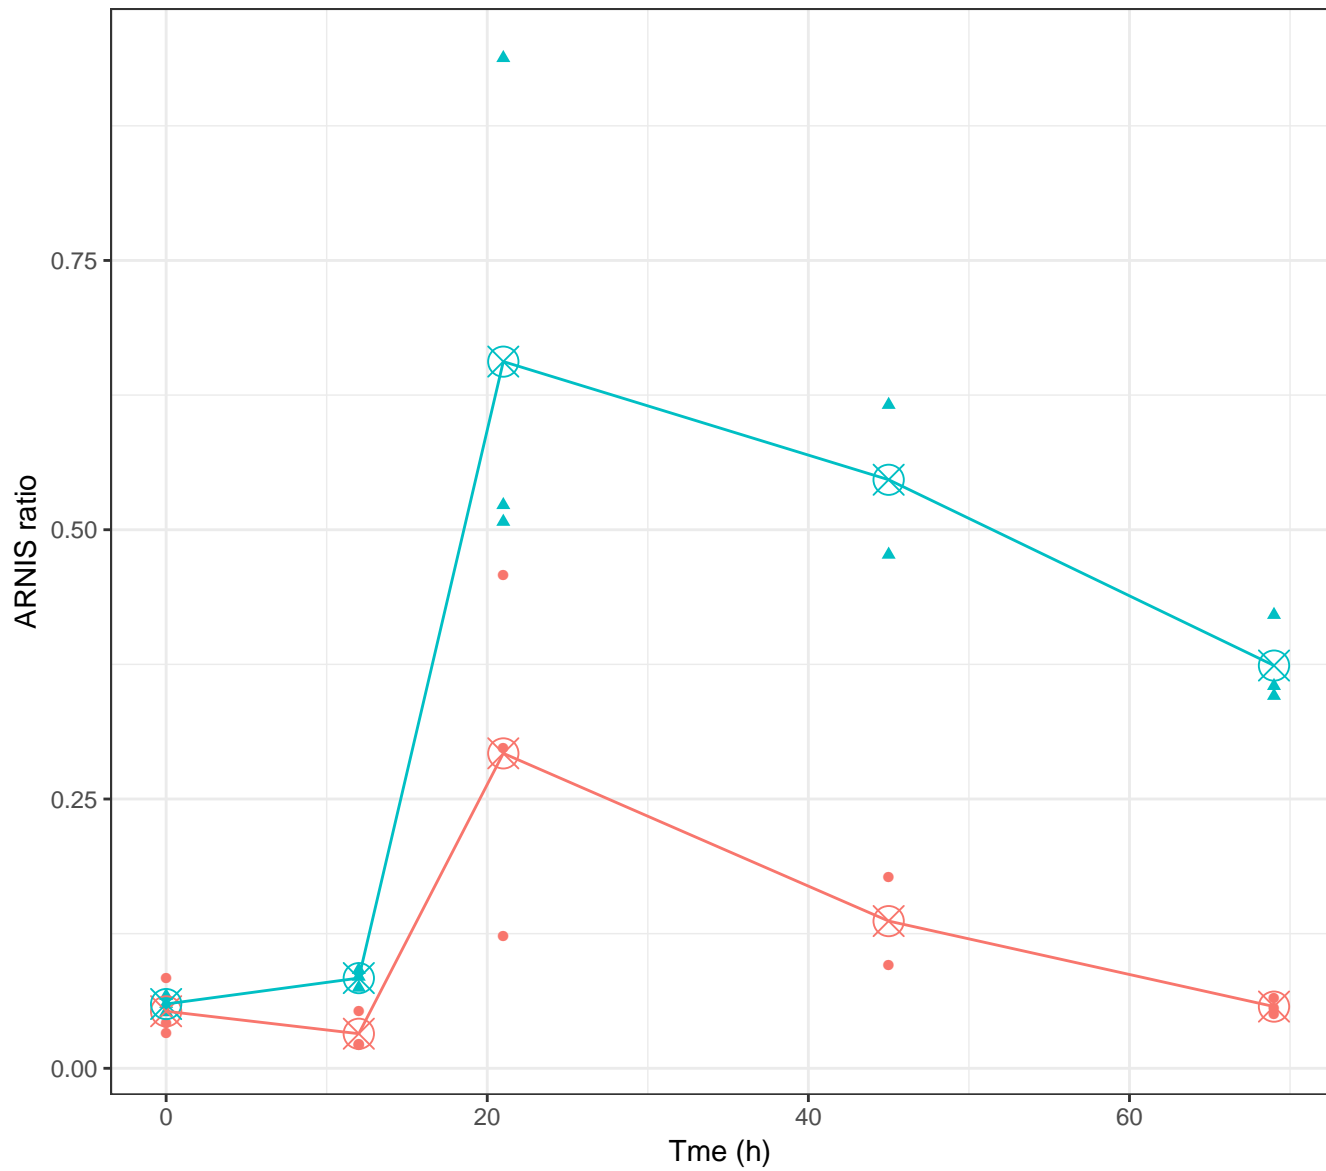

## OTU.87\_Verrucomicrobia\_Prostheco bacter

Treatment Control Filtered-1micron

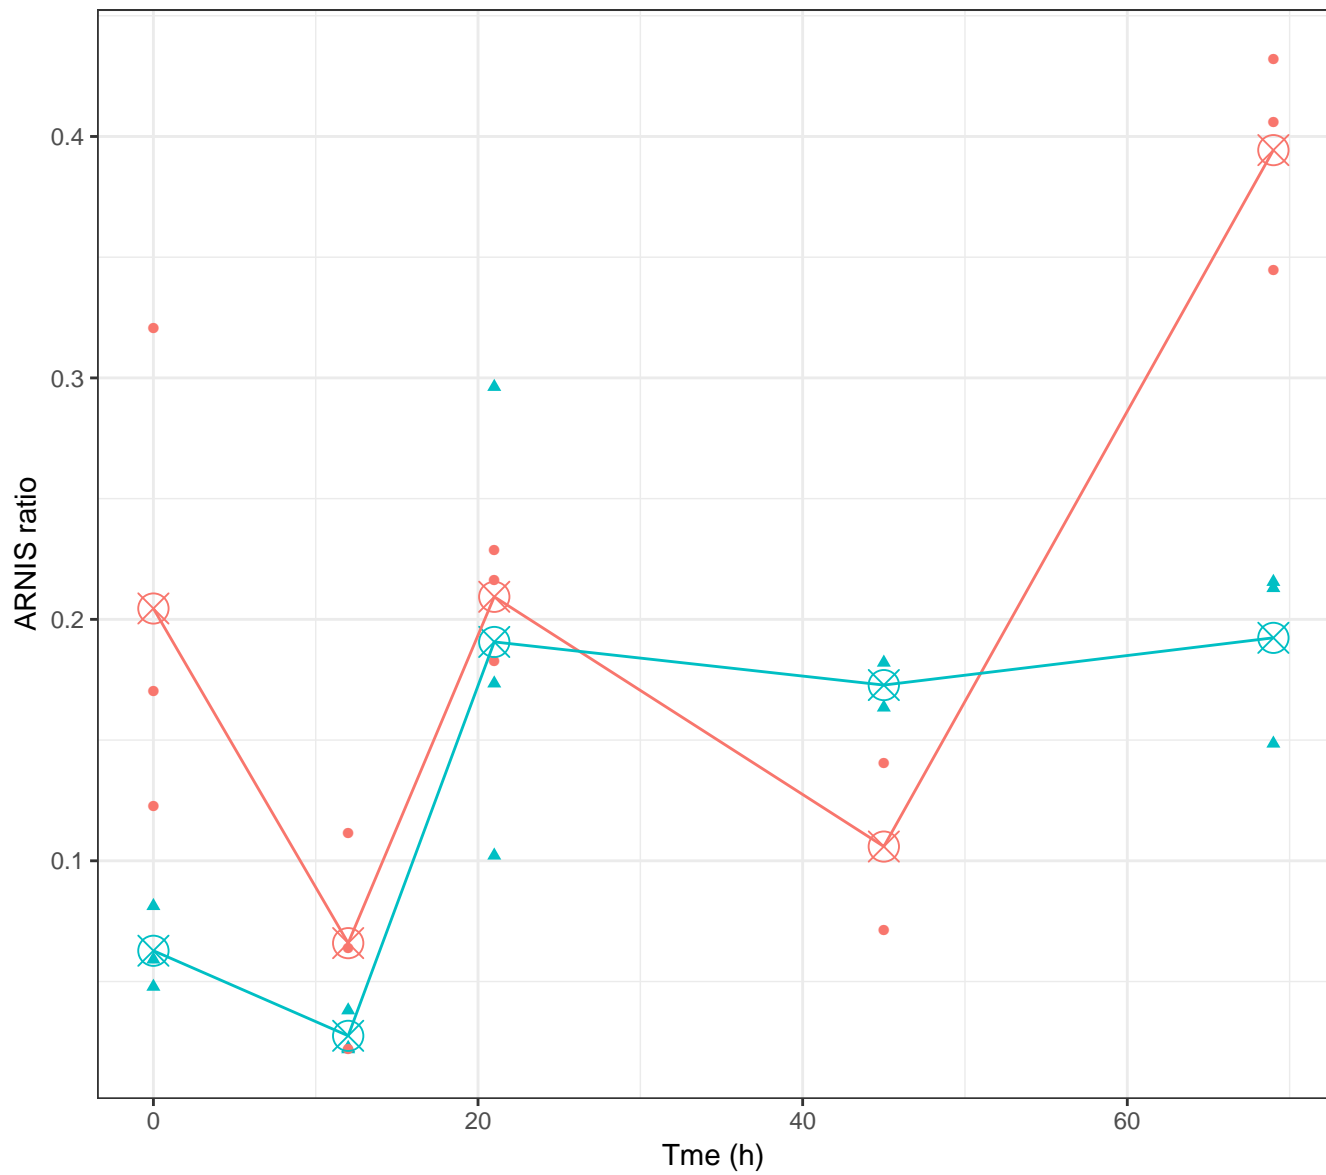

# OTU.7\_Actinobacteria\_Candidatus\_Planktophila

Treatment ⊗ Control ⊗ Filtered-1micron

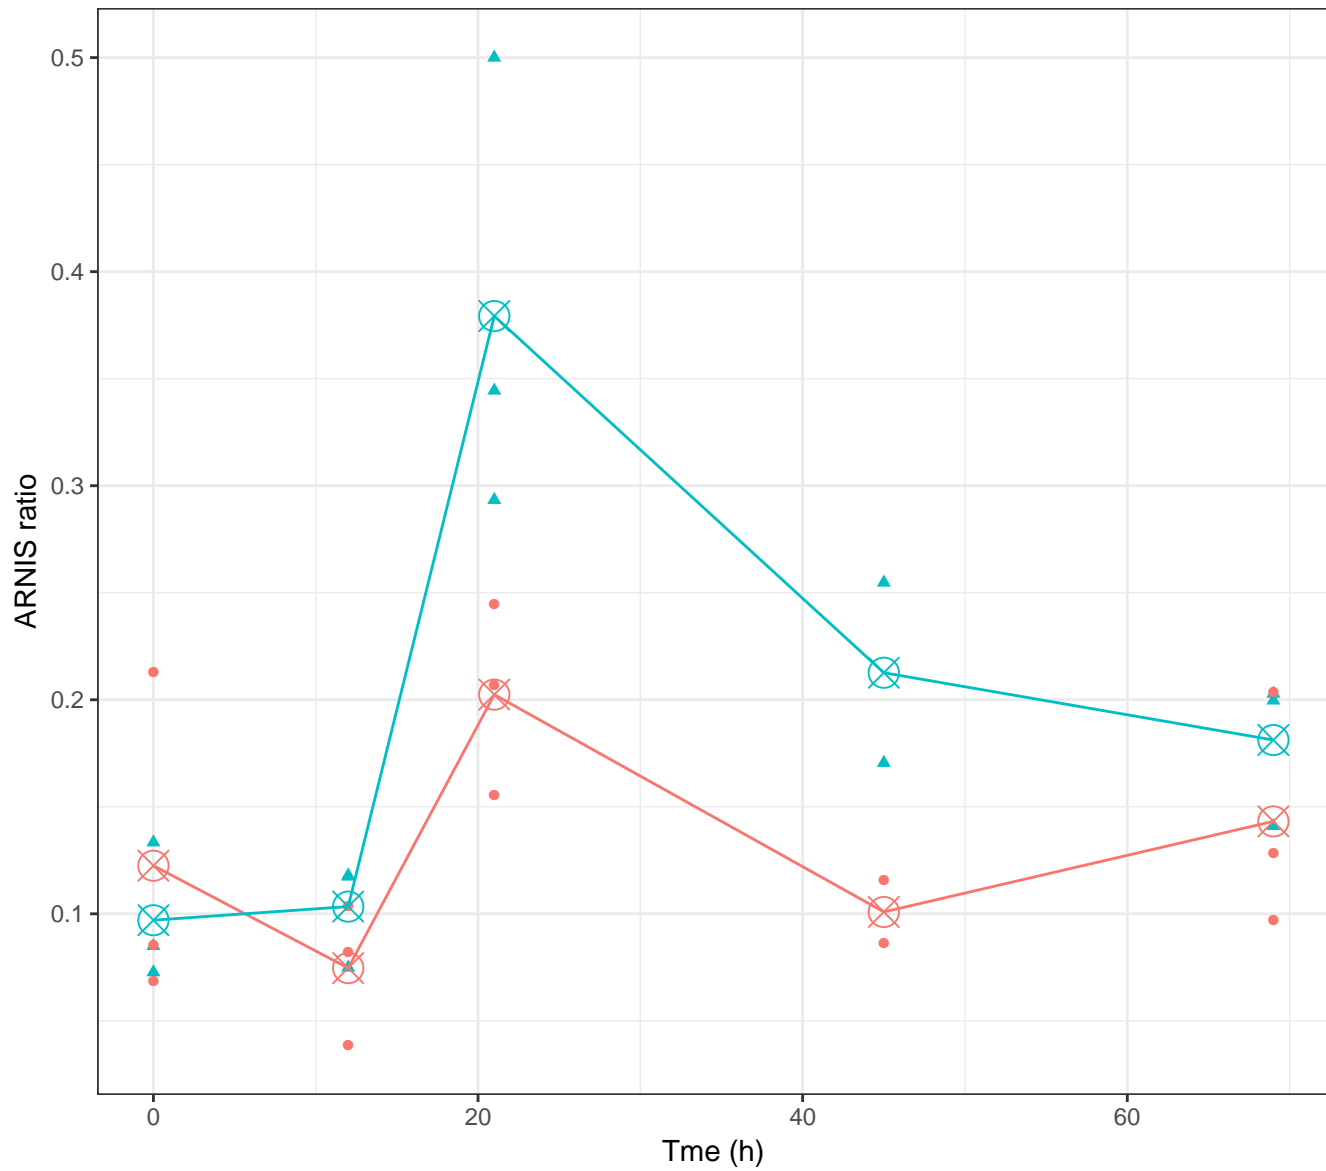

## OTU.101\_Verrucomicrobia\_Brevifollis

Treatment Control Filtered-1micron

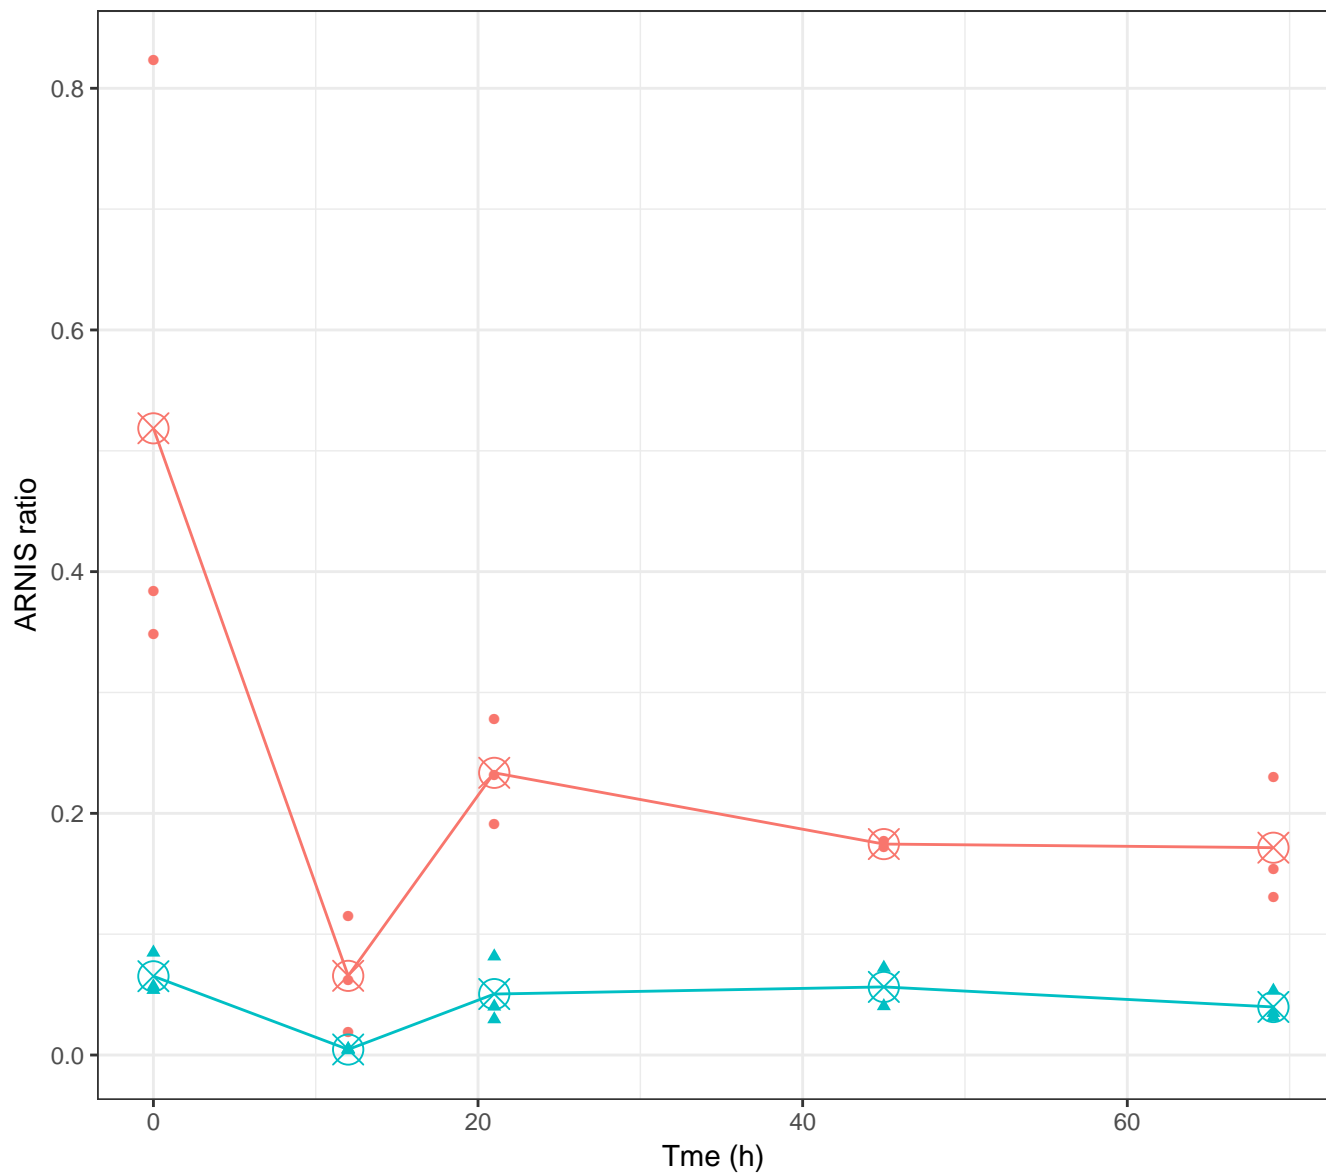

# OTU.53\_Betaproteobacteria\_Caenimonas

Treatment Control Filtered-1micron

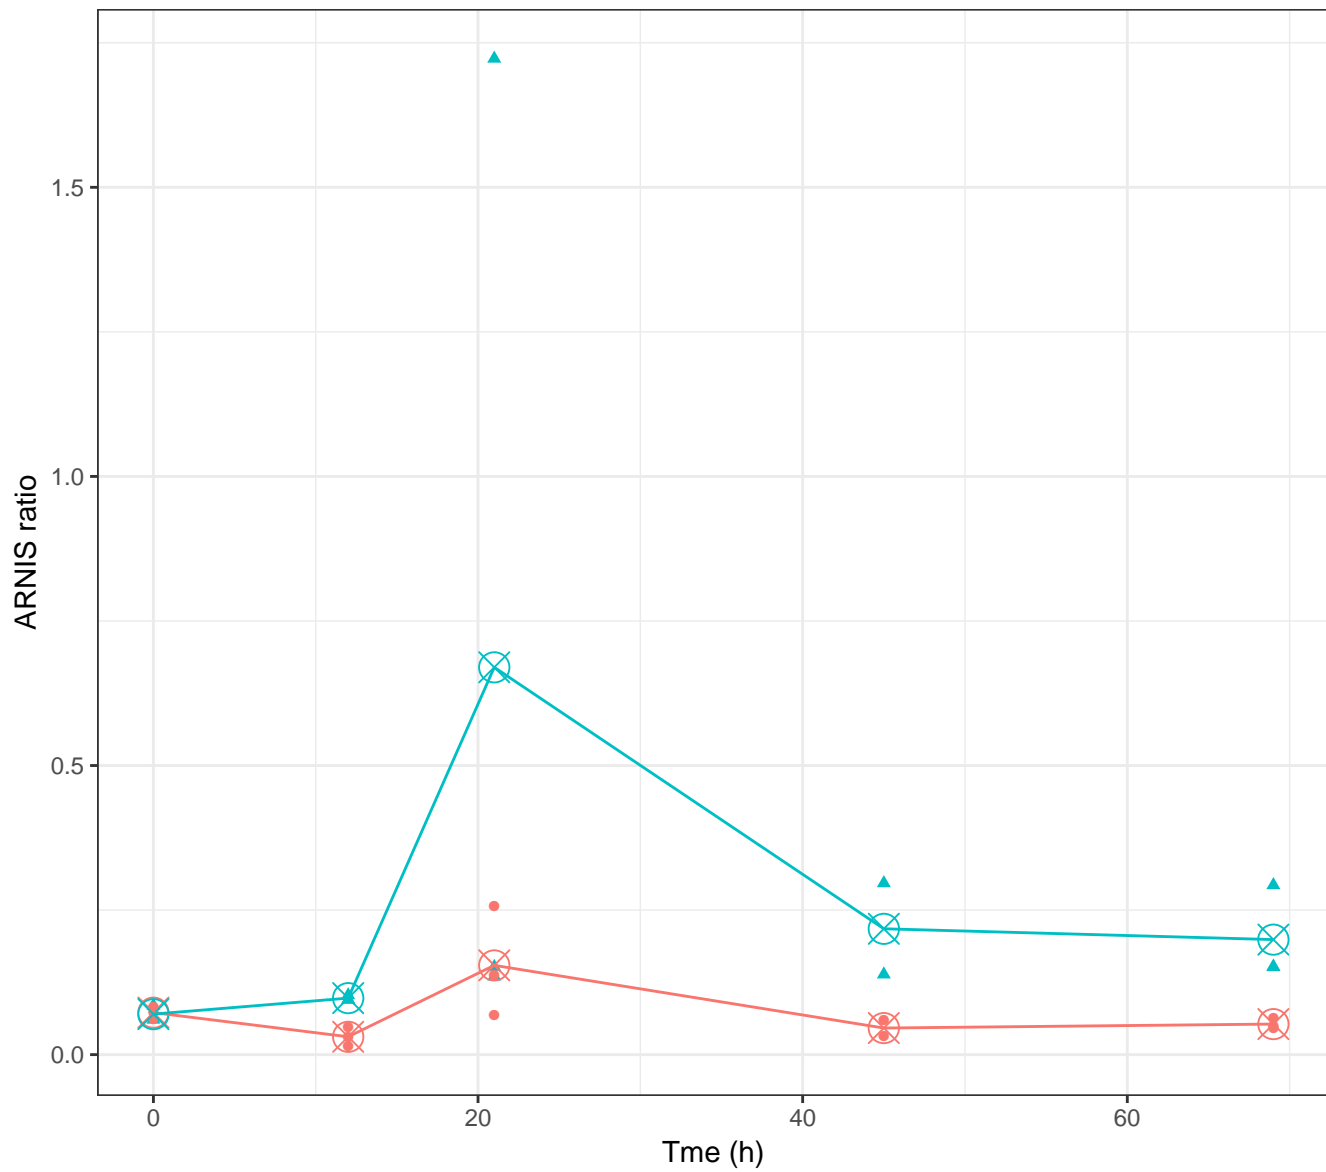

# OTU.31\_Betaproteobacteria\_Polaromonas

Treatment ⊗ Control ⊗ Filtered-1micron

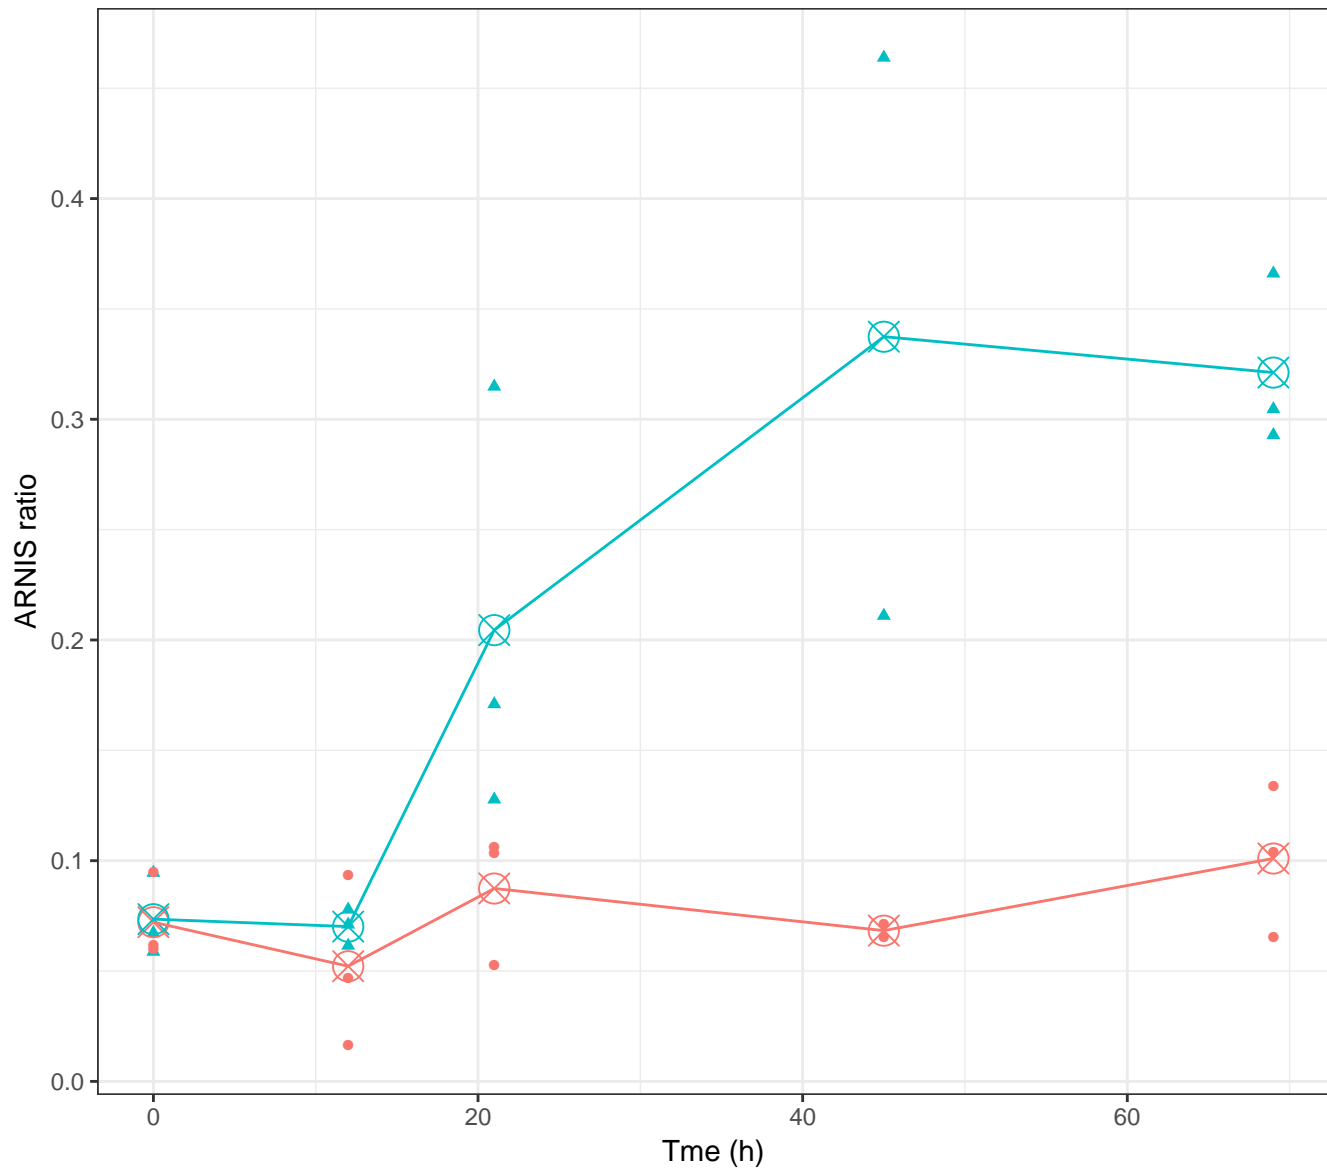



# OTU.41\_Actinobacteria\_clade\_ac\_VII

Treatment Control Filtered-1micron

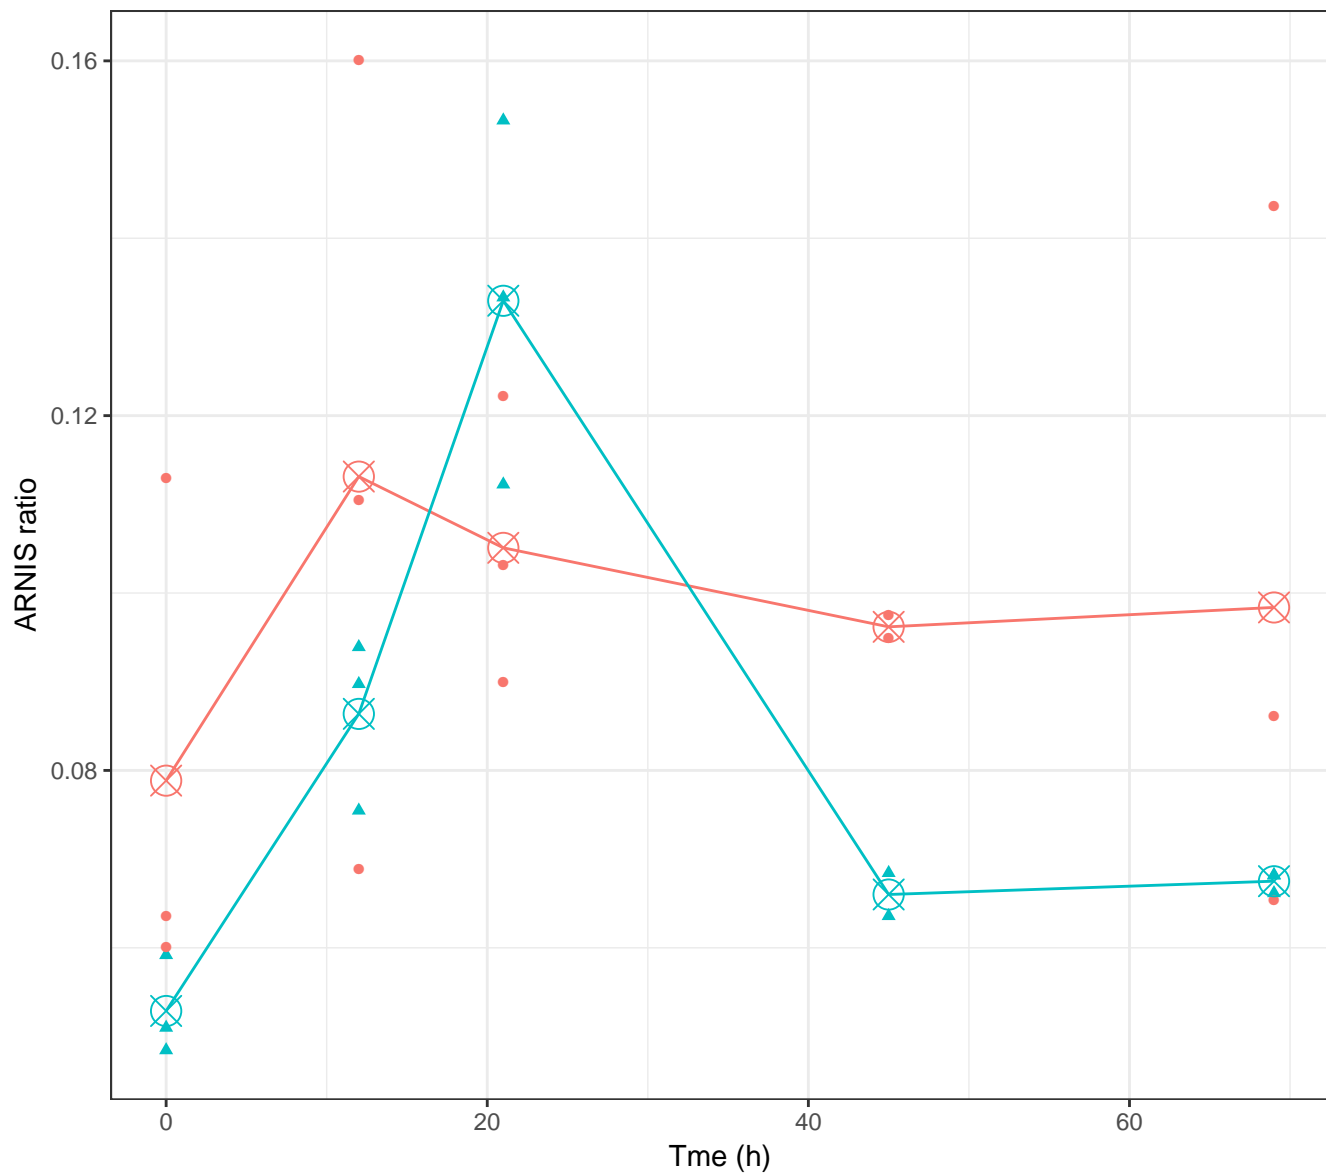

# OTU.104\_Alphaproteobacteria\_Sphingomonas

Treatment Control Filtered-1micron

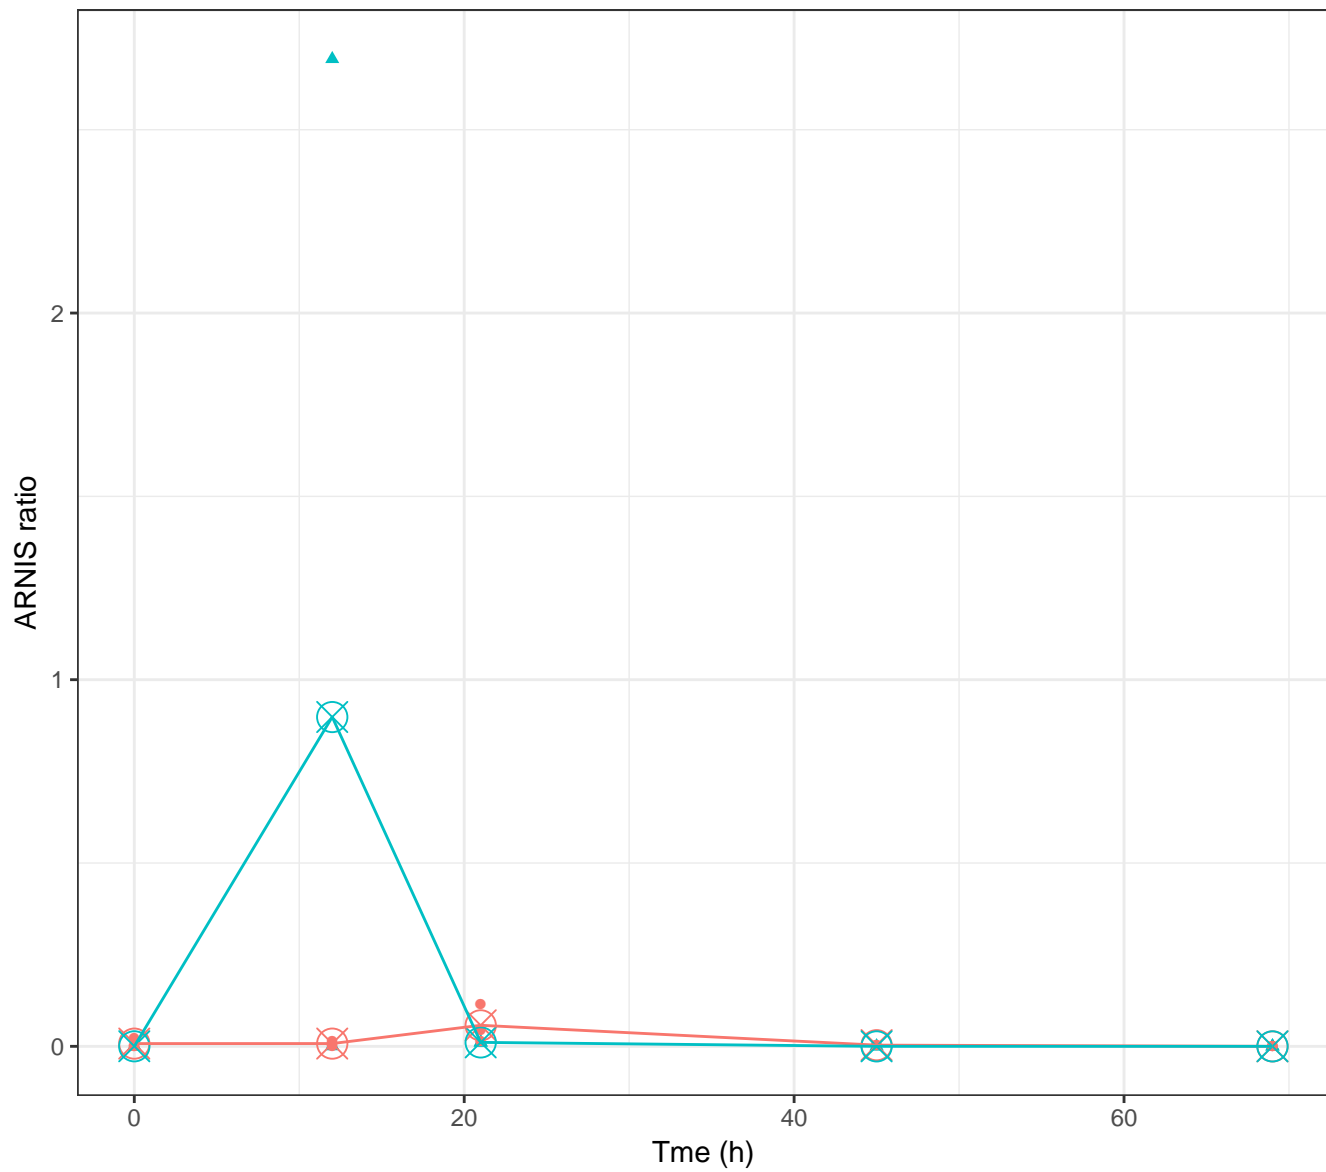

# OTU.126\_Betaproteobacteria\_Comamonadaceae

Treatment Control Filtered-1micron

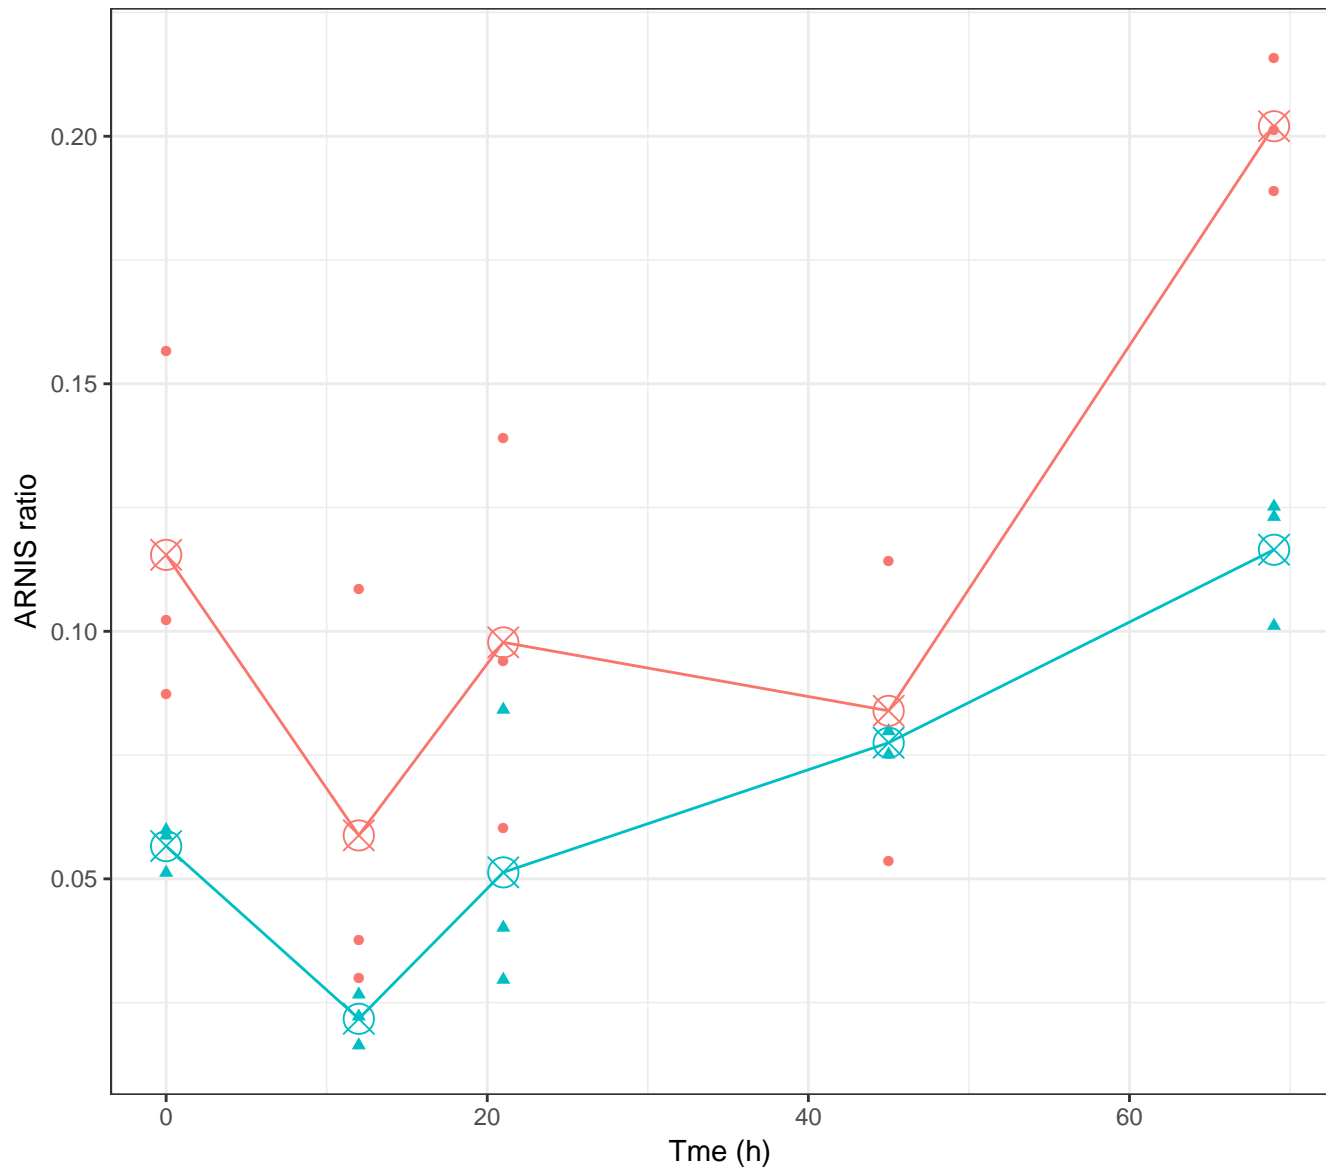

# OTU.8066\_Betaproteobacteria\_Polynucleobacter

Treatment Control Filtered-1micron

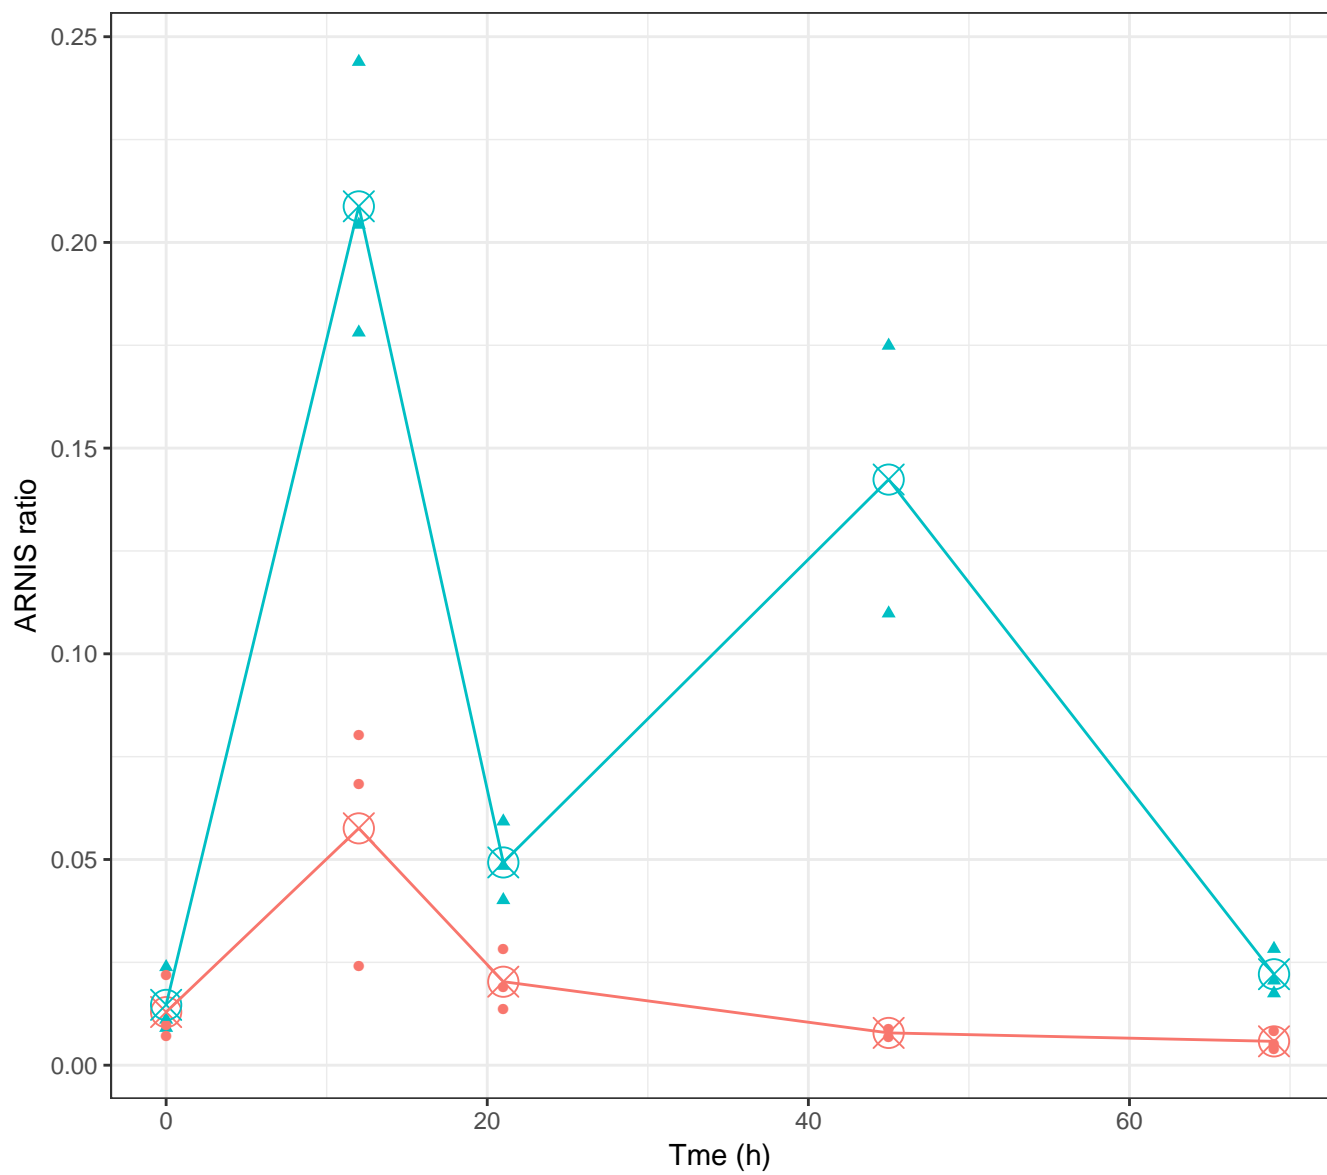

# OTU.119\_Alphaproteobacteria\_Roseomonas

Treatment Control Filtered-1micron

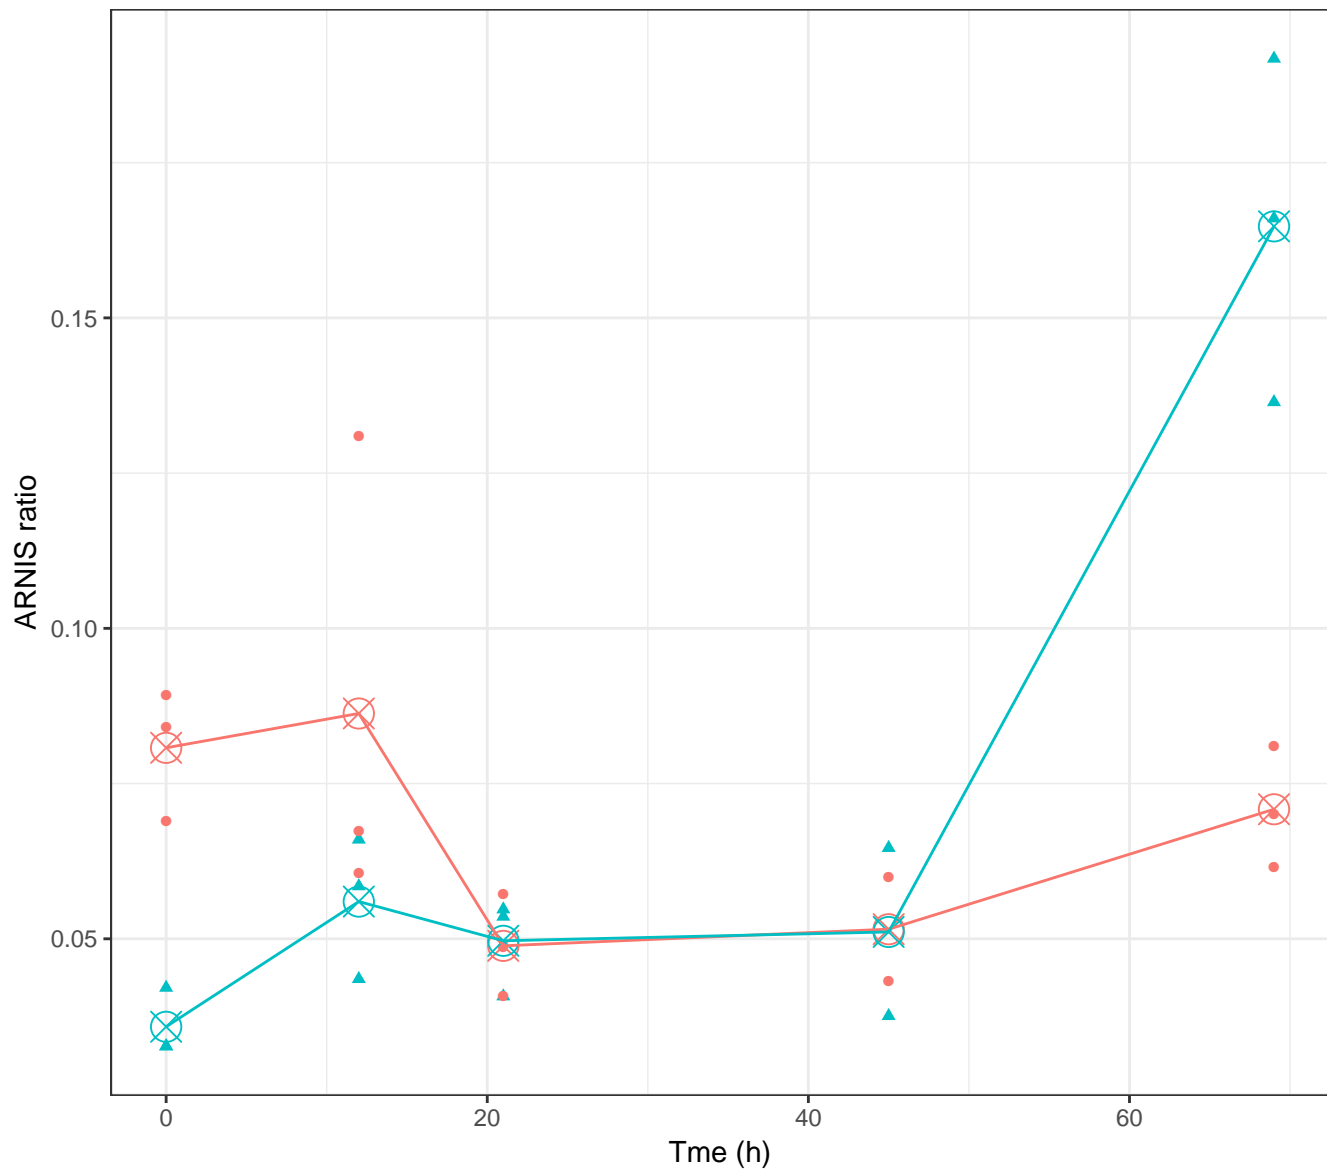

# OTU.92\_Bacteroidetes\_Ferruginibacter

Treatment  Control  Filtered-1micron

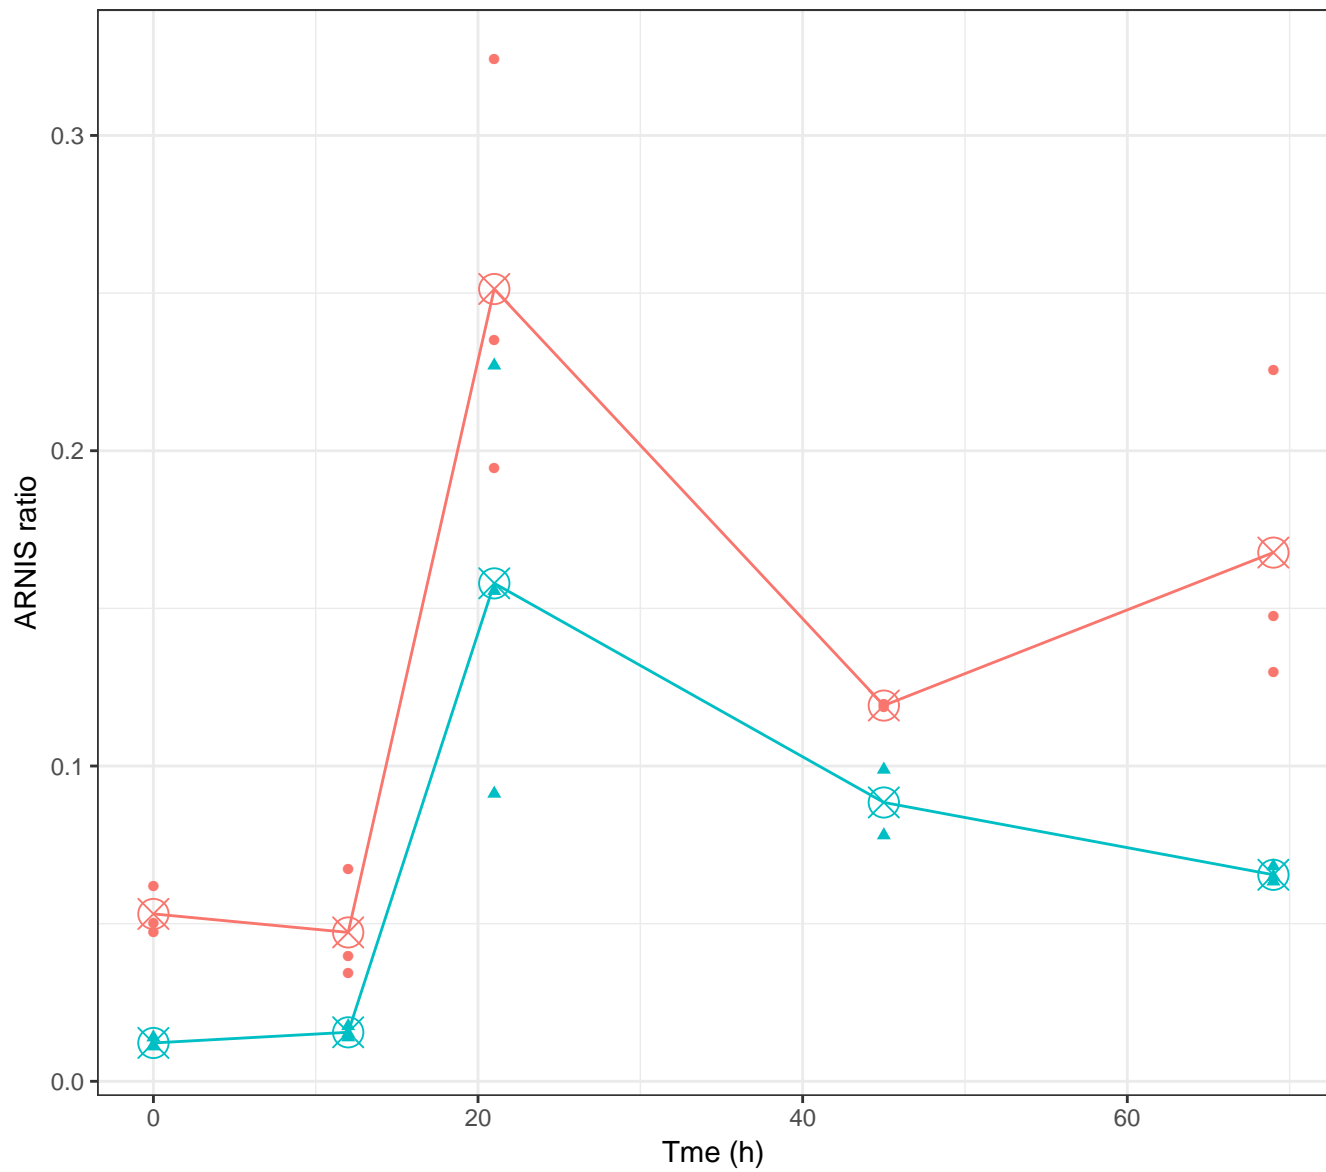

# OTU.82\_Bacteroidetes\_Sediminibacterium

Treatment ⊗ Control ⊗ Filtered-1micron

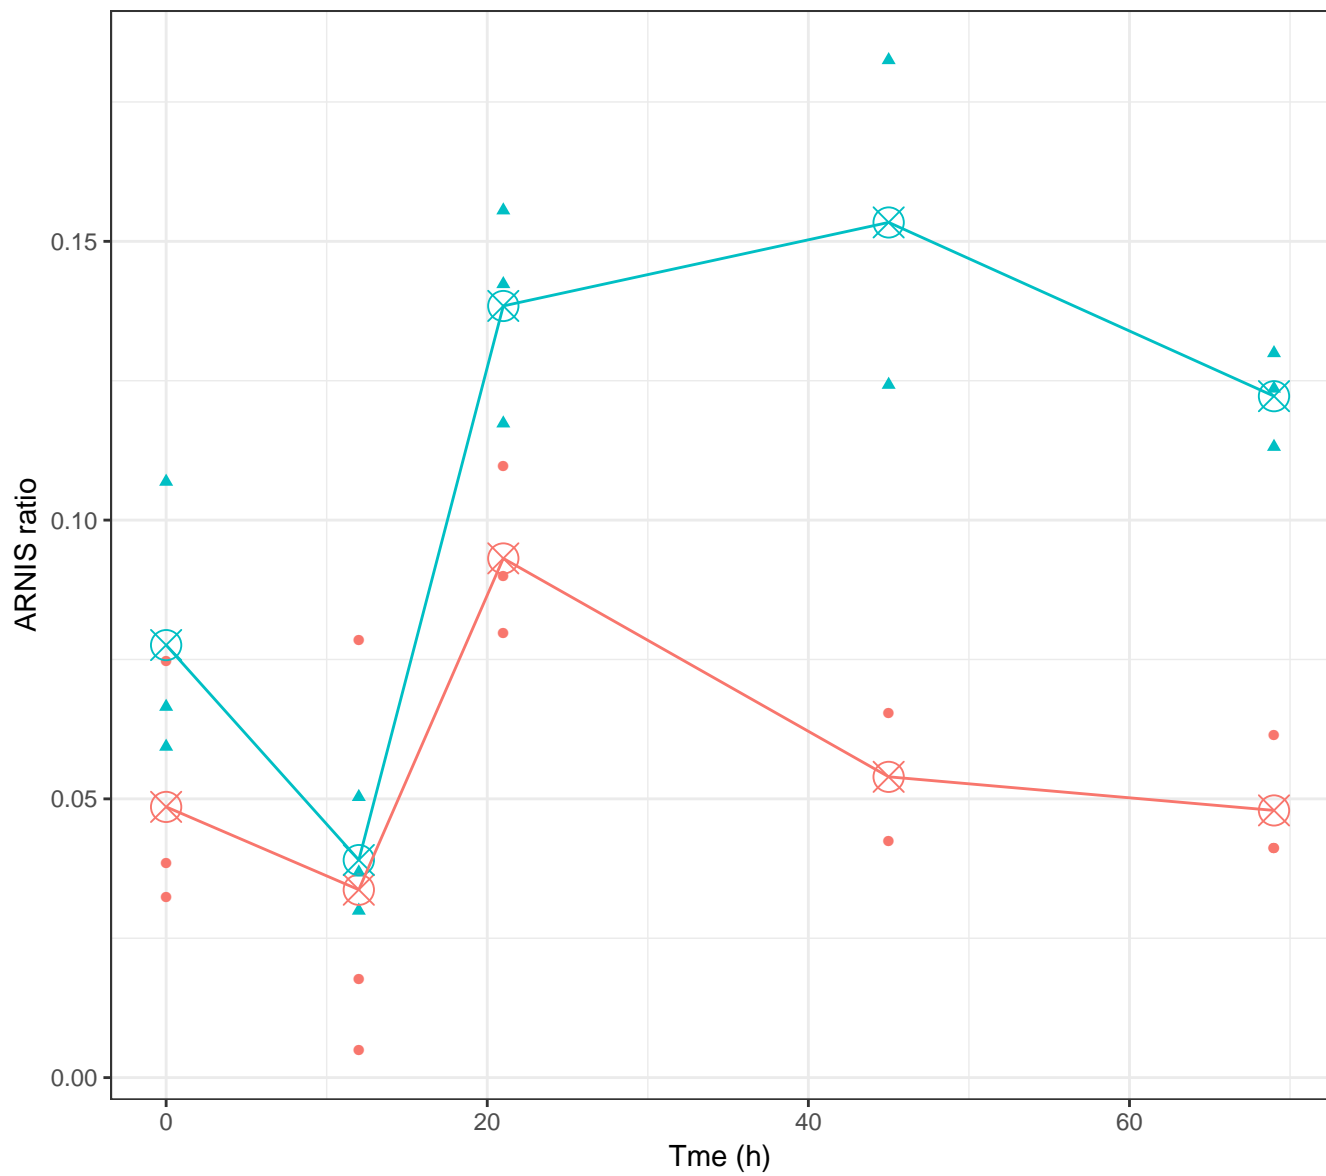

# OTU.3808\_Verrucomicrobia\_Prostheco bacter

Treatment ⊗ Control ⊗ Filtered-1micron

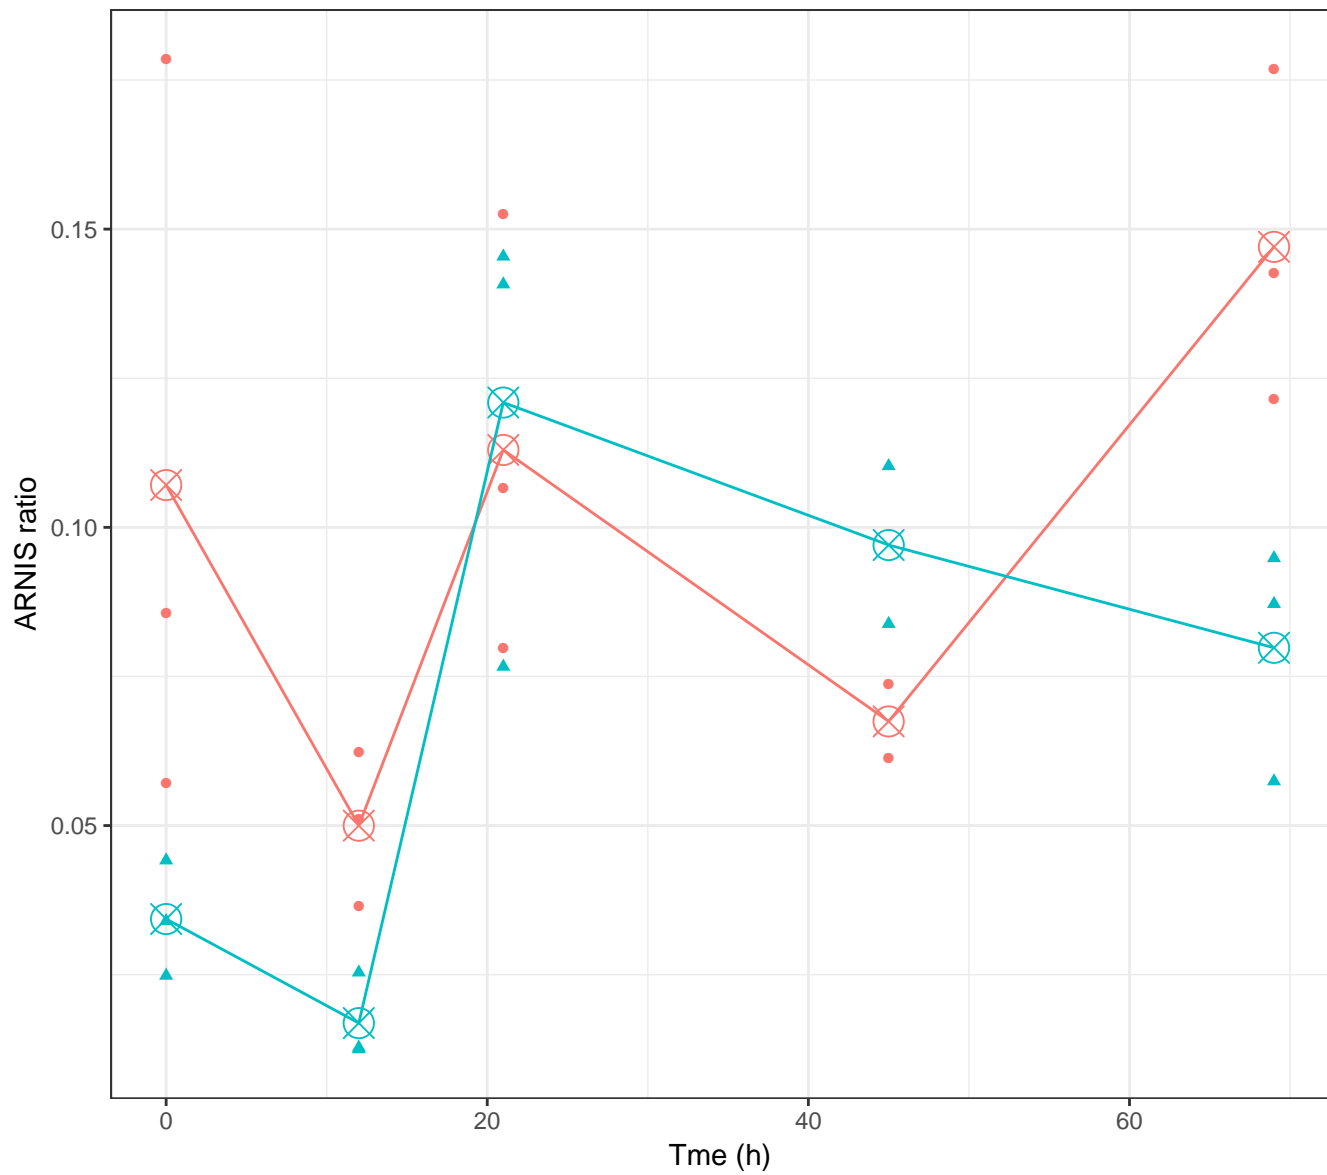



## OTU.2\_Betaproteobacteria\_Limnohabitans\_Lim.B

Treatment  Control  Filtered-1micron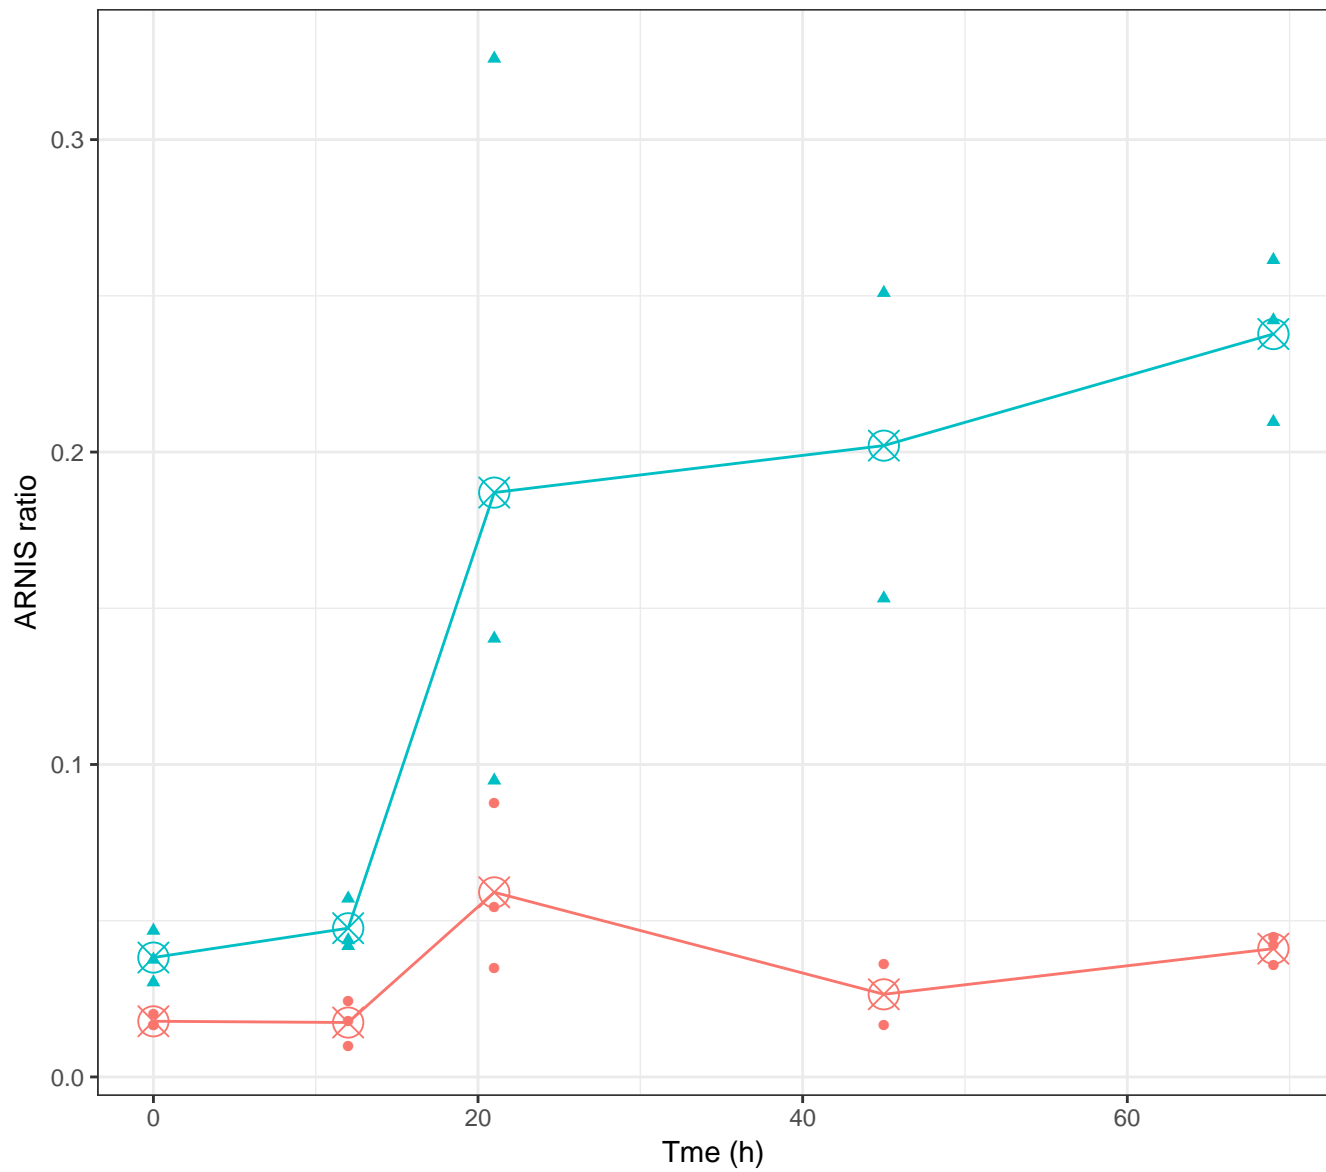

# OTU.97\_Verrucomicrobia\_OPB35\_soil\_group

Treatment Control Filtered-1micron

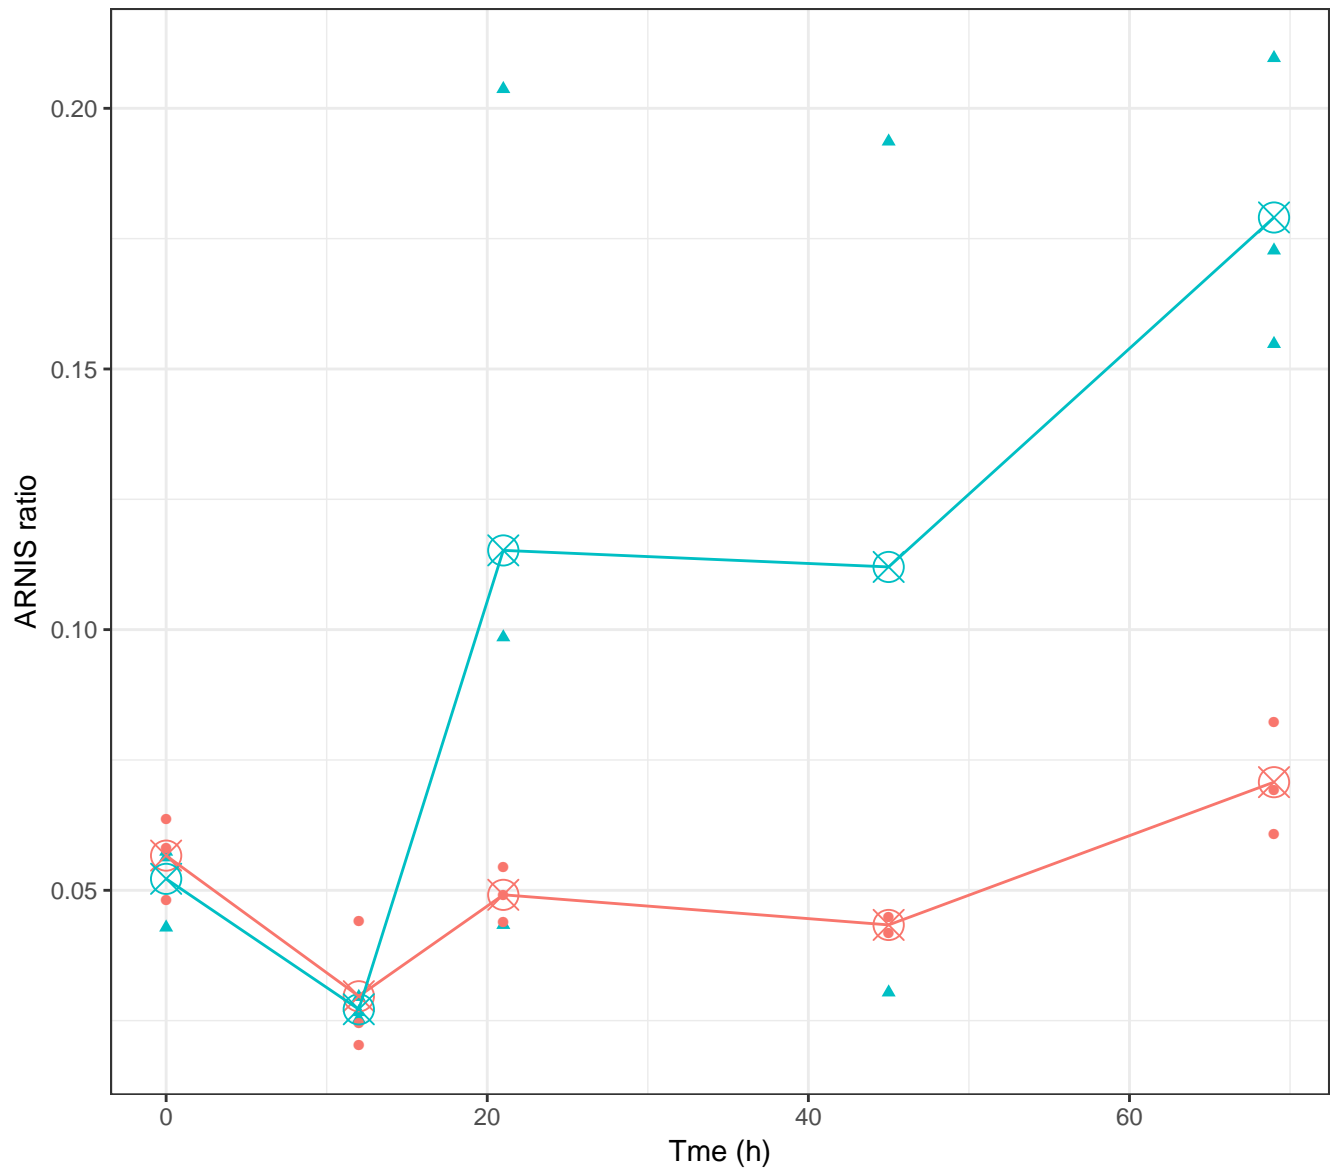

# OTU.164\_Gammaproteobacteria\_Xanthomonadales

Treatment Control Filtered-1micron

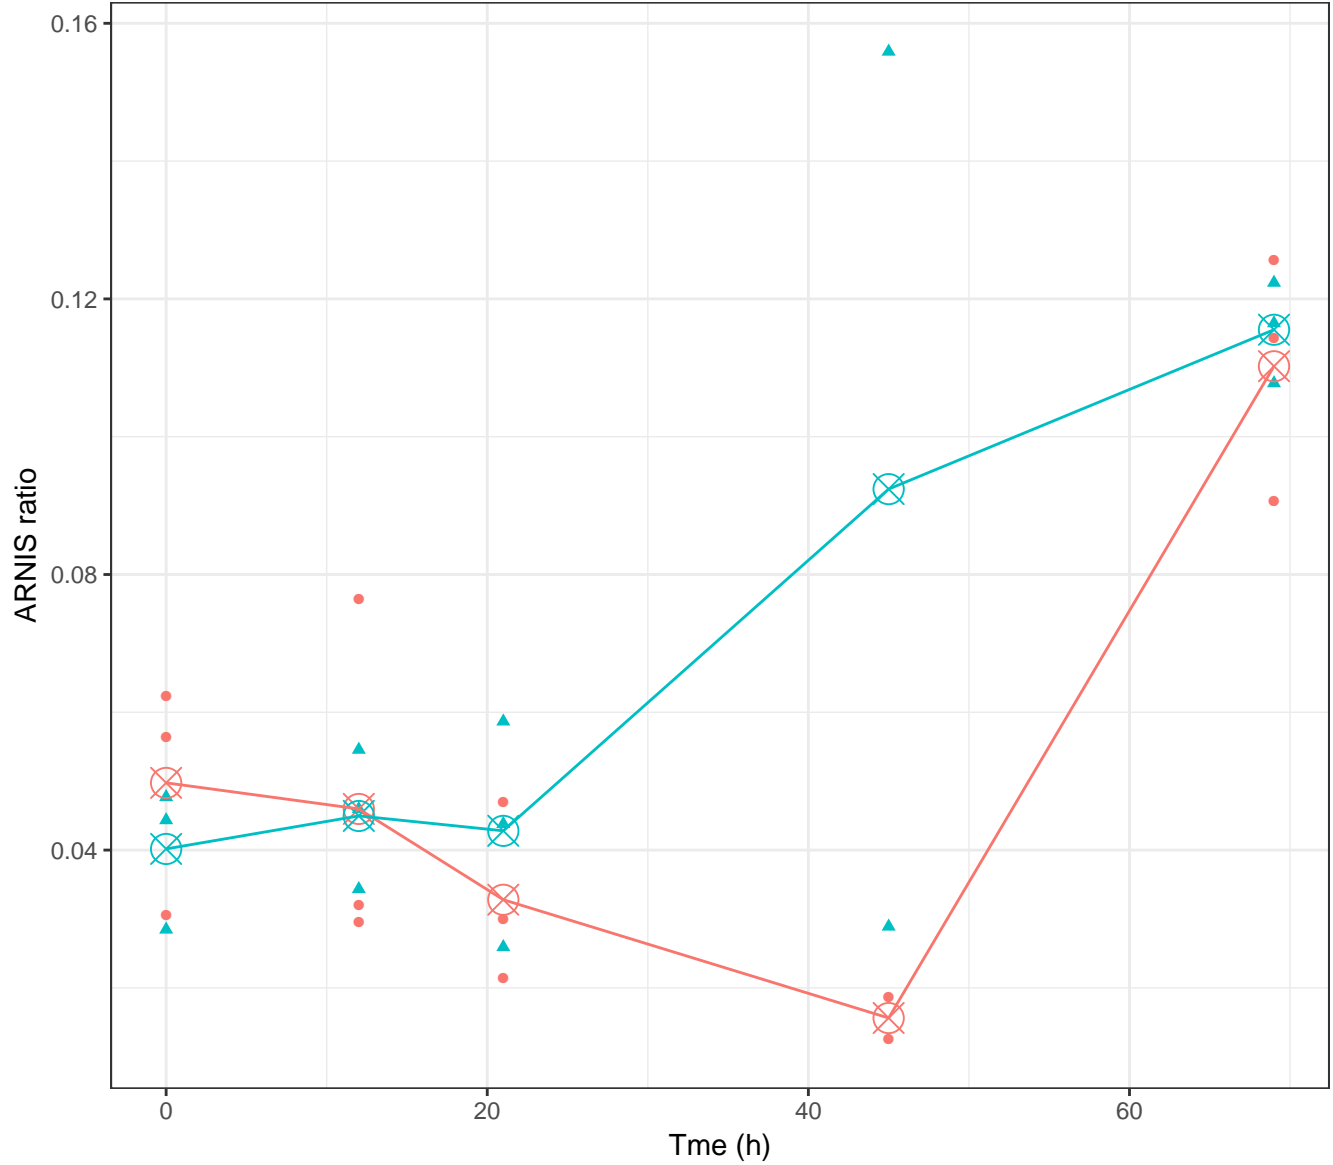

# OTU.86\_Betaproteobacteria\_Comamonadaceae

Treatment  Control  Filtered-1micron

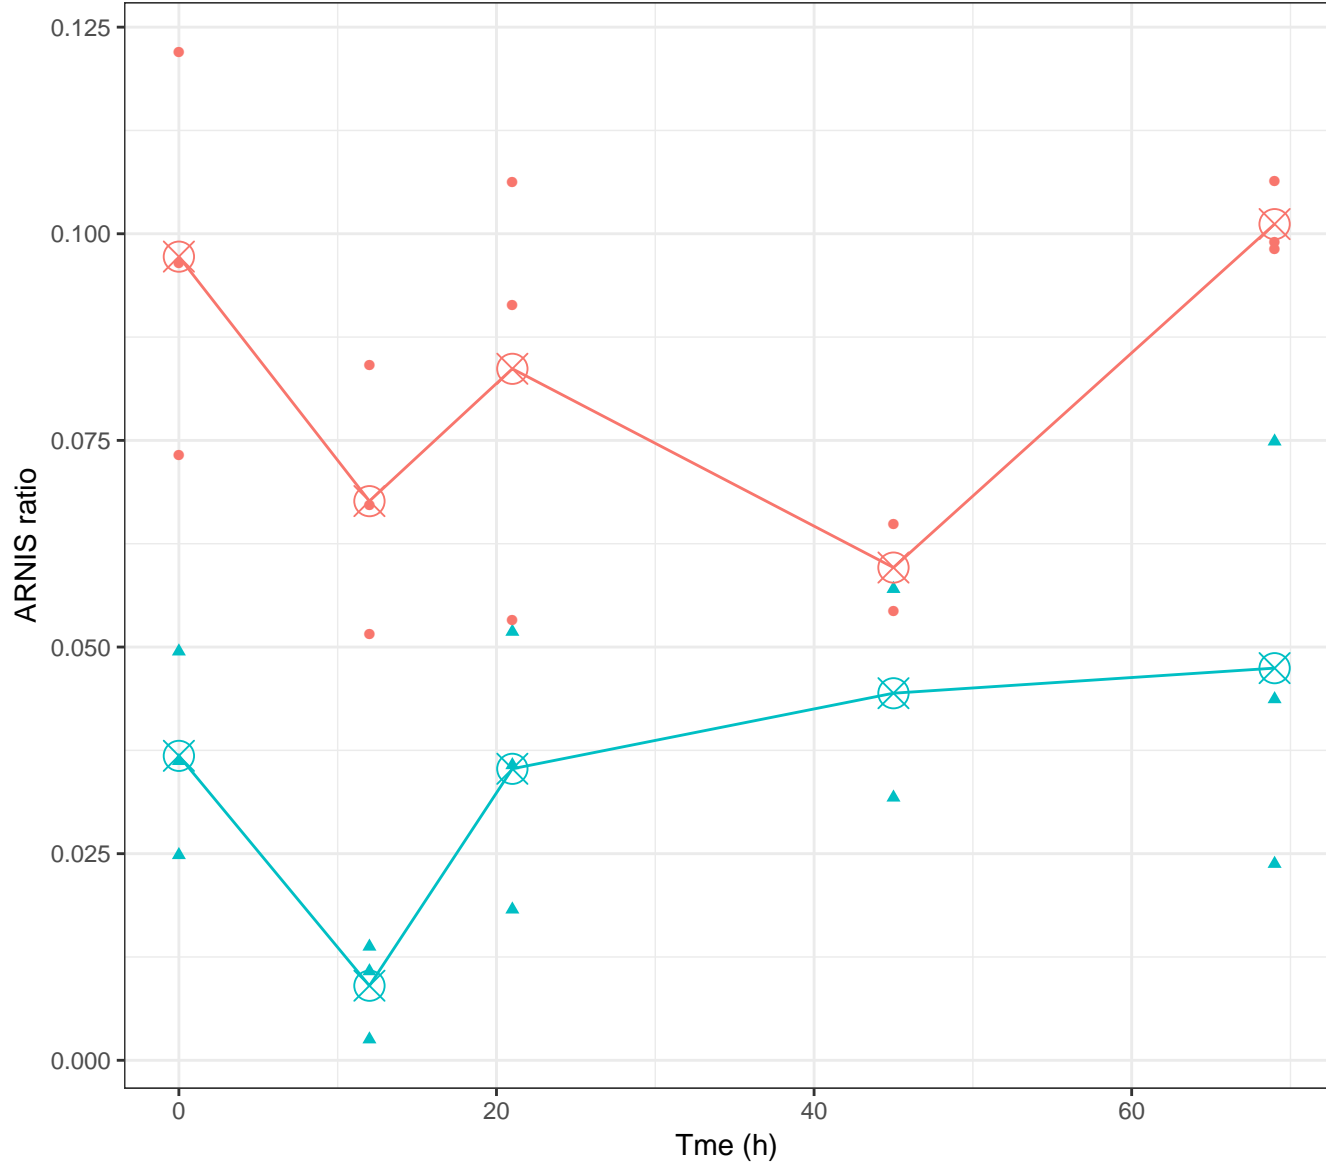

# OTU.23\_Bacteroidetes\_Sediminibacterium

Treatment Control Filtered-1micron

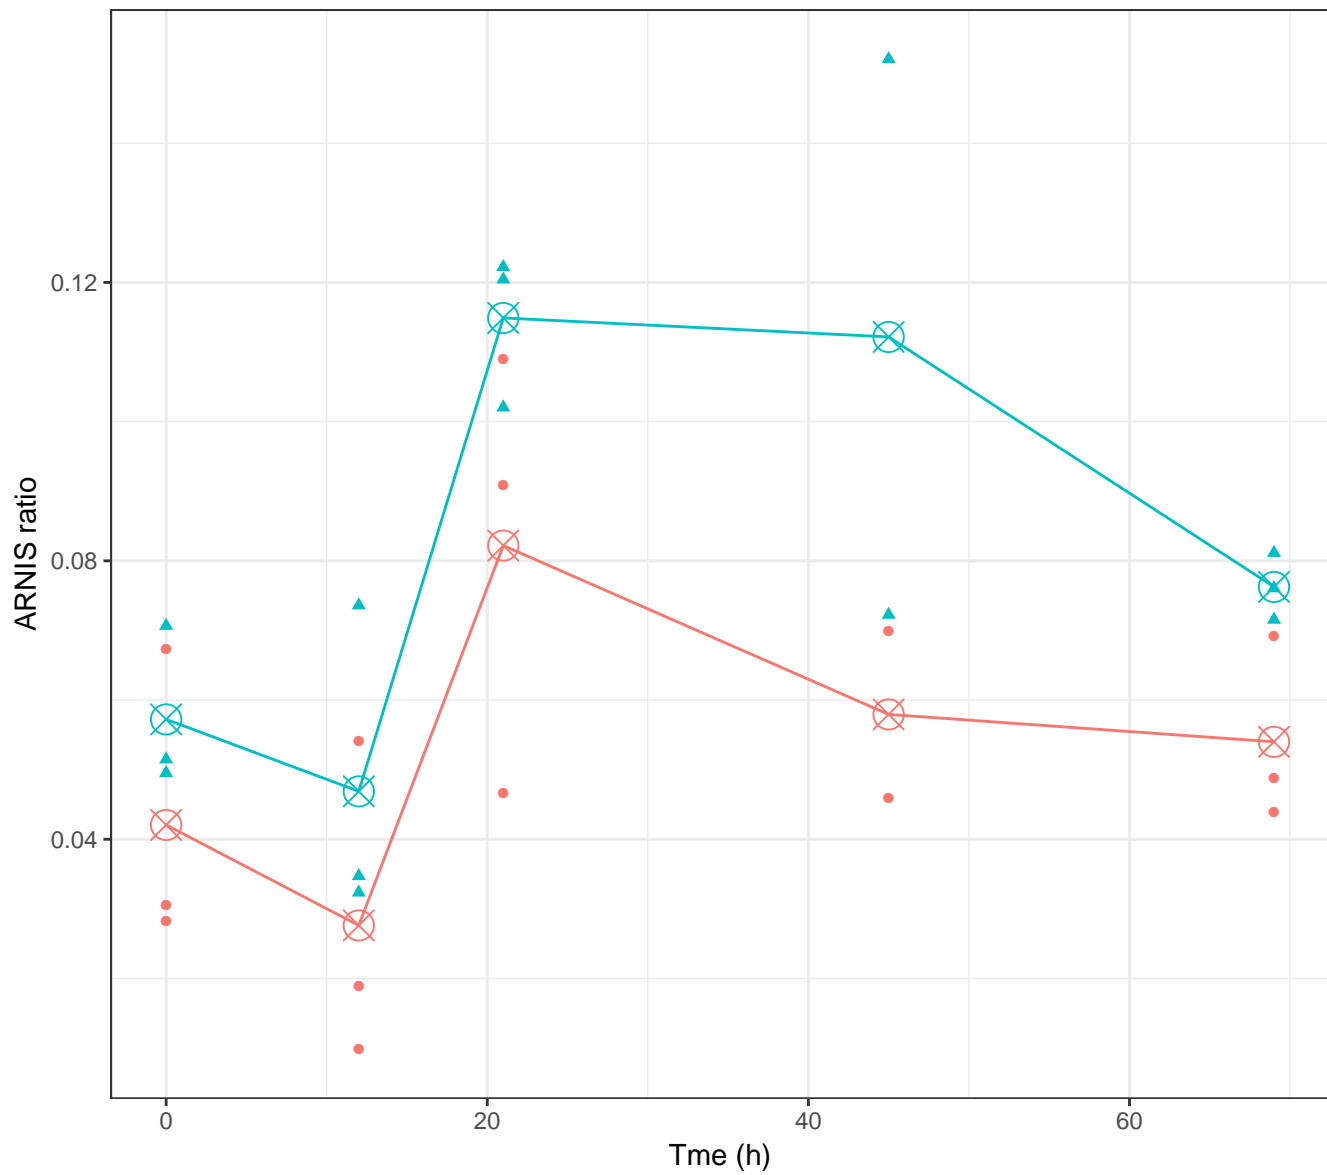

# OTU.259\_Chloroflexi\_Roseiflexus

Treatment Control Filtered-1micron

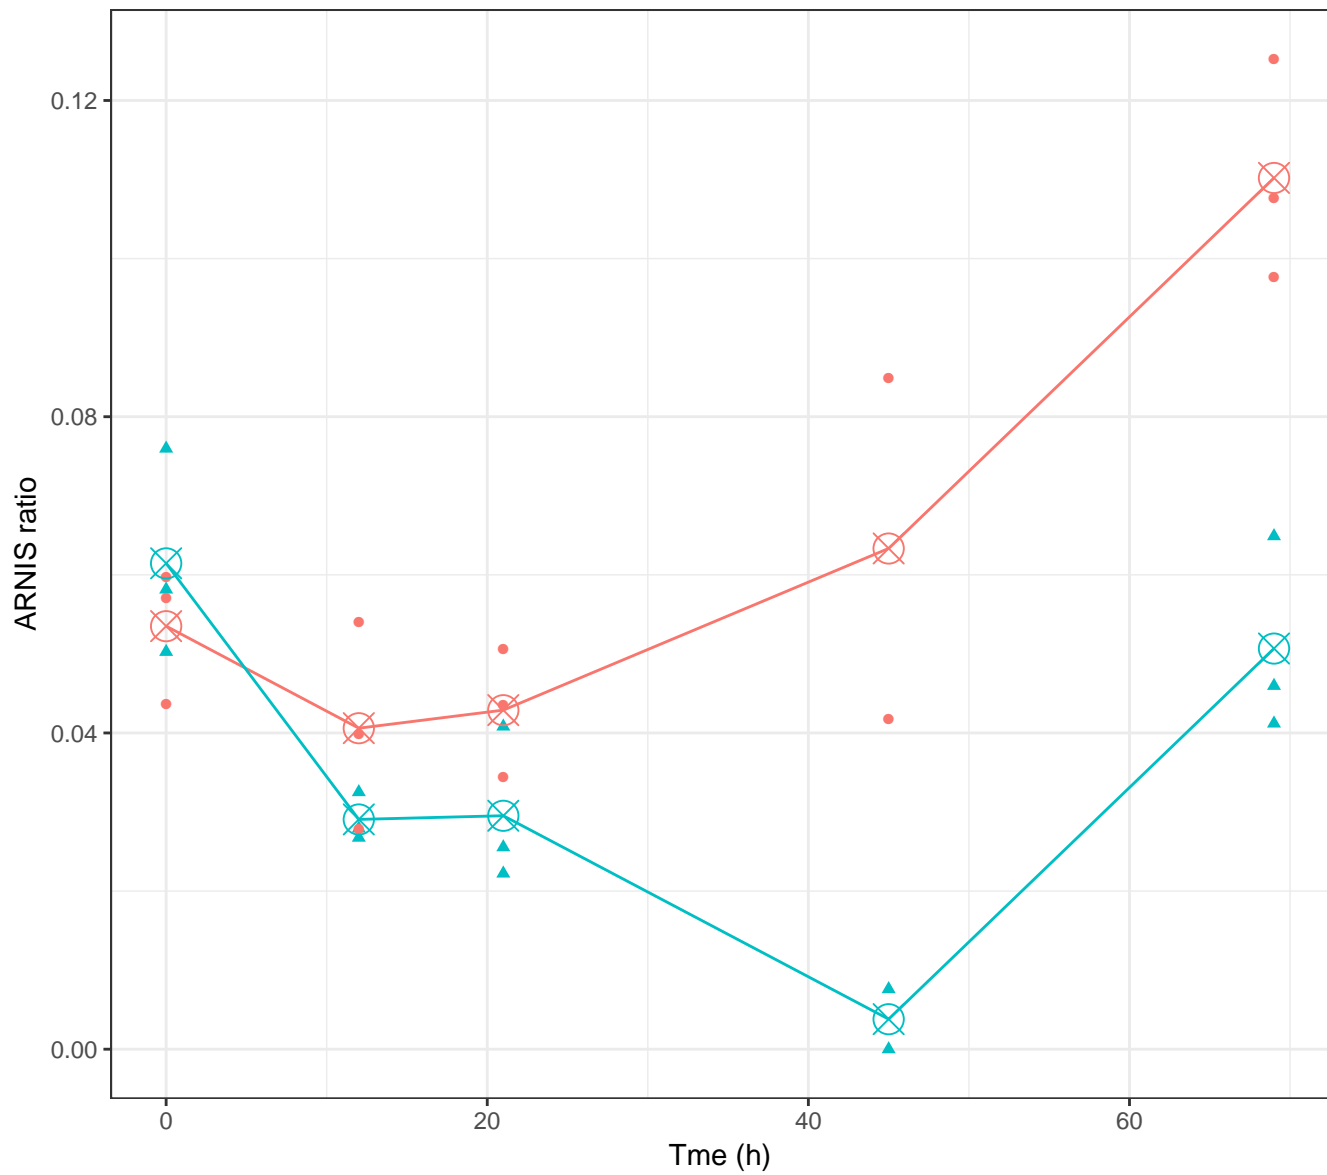

## OTU.173\_Bacteroidetes\_Sphingobacteriaceae\_LiUU.11.161

Treatment  Control  Filtered-1micron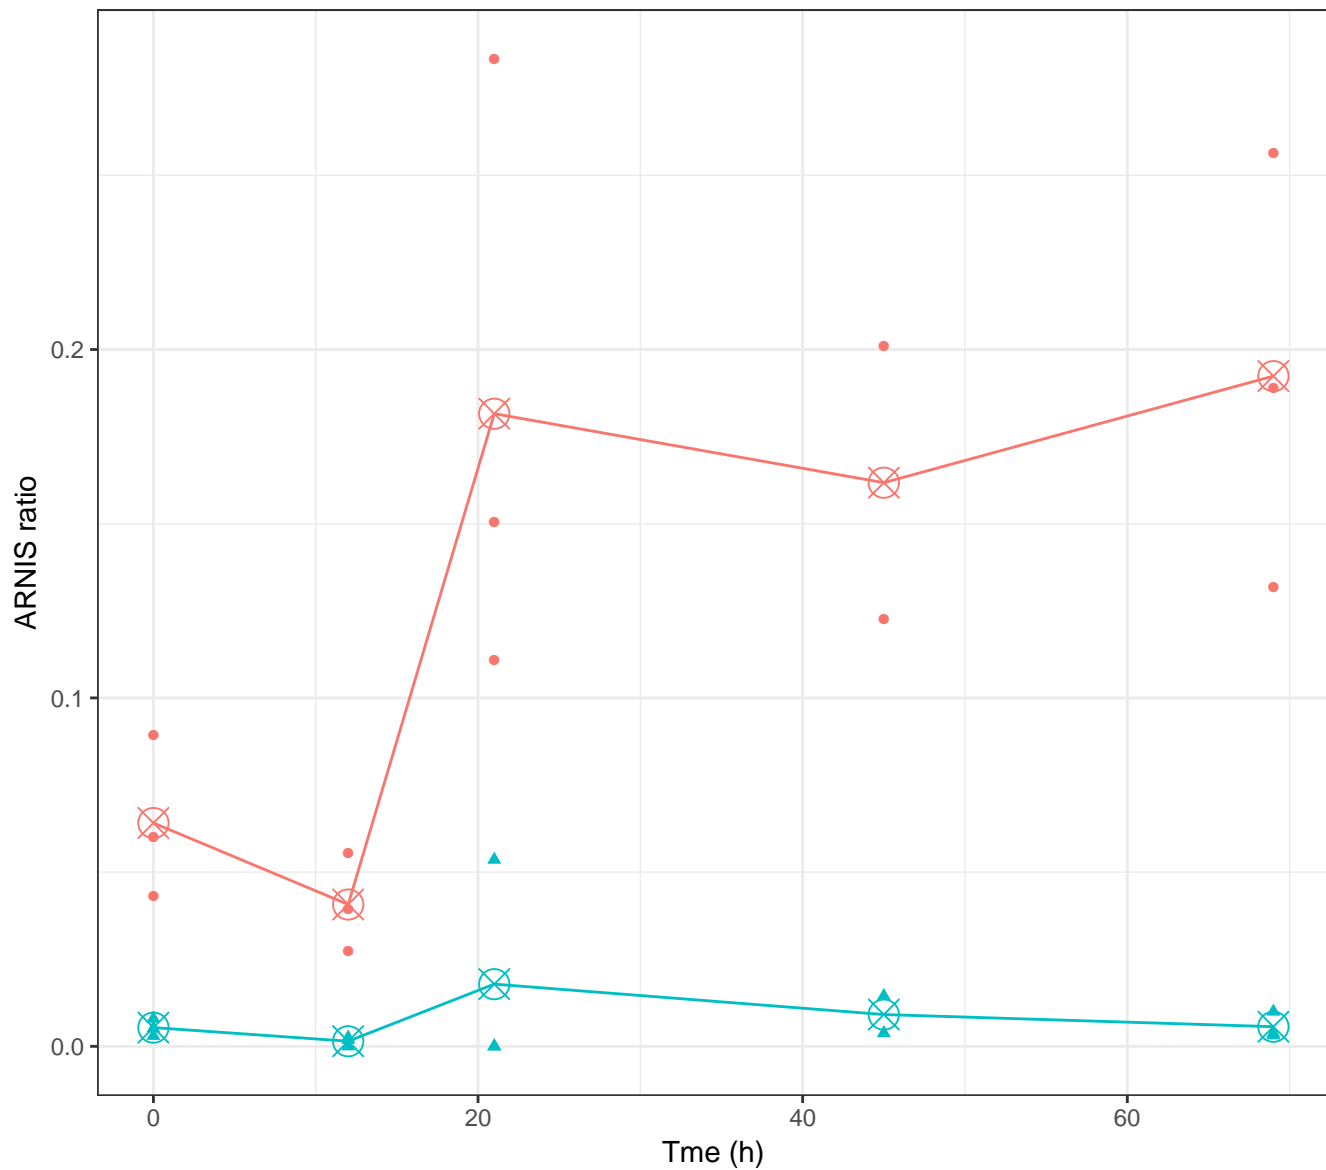

# OTU.154\_Verrucomicrobia\_FukuN18\_freshwater\_group

Treatment ⊗ Control ⊗ Filtered-1micron

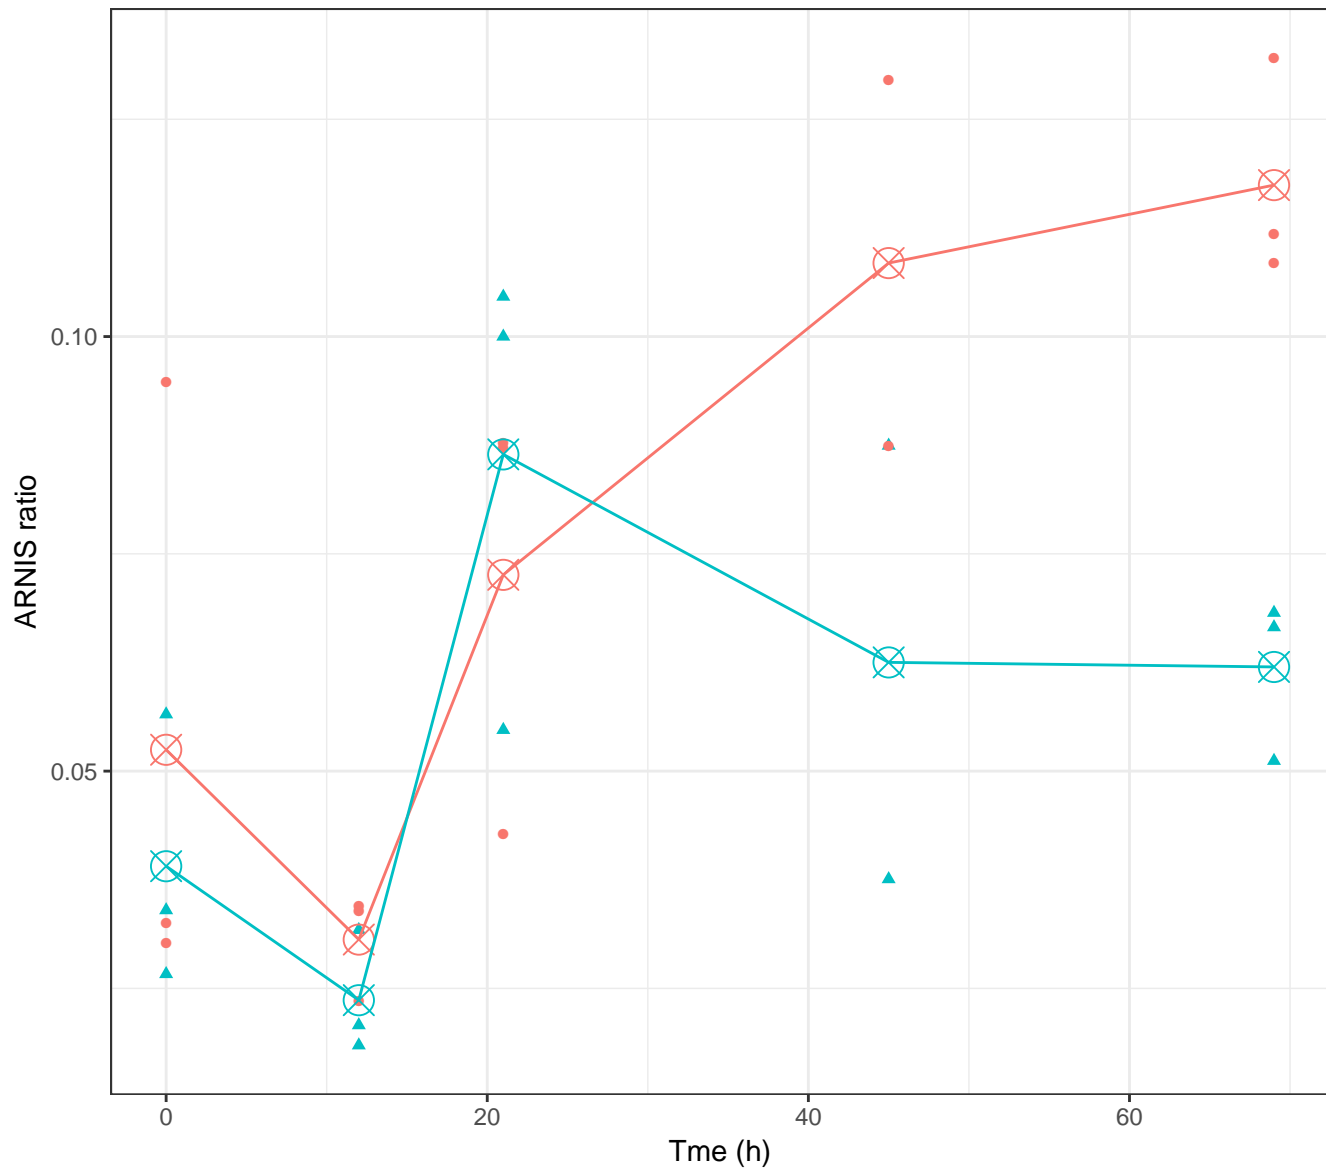



# OTU.149\_Bacteroidetes\_Hydrotalea

Treatment Control Filtered-1micron

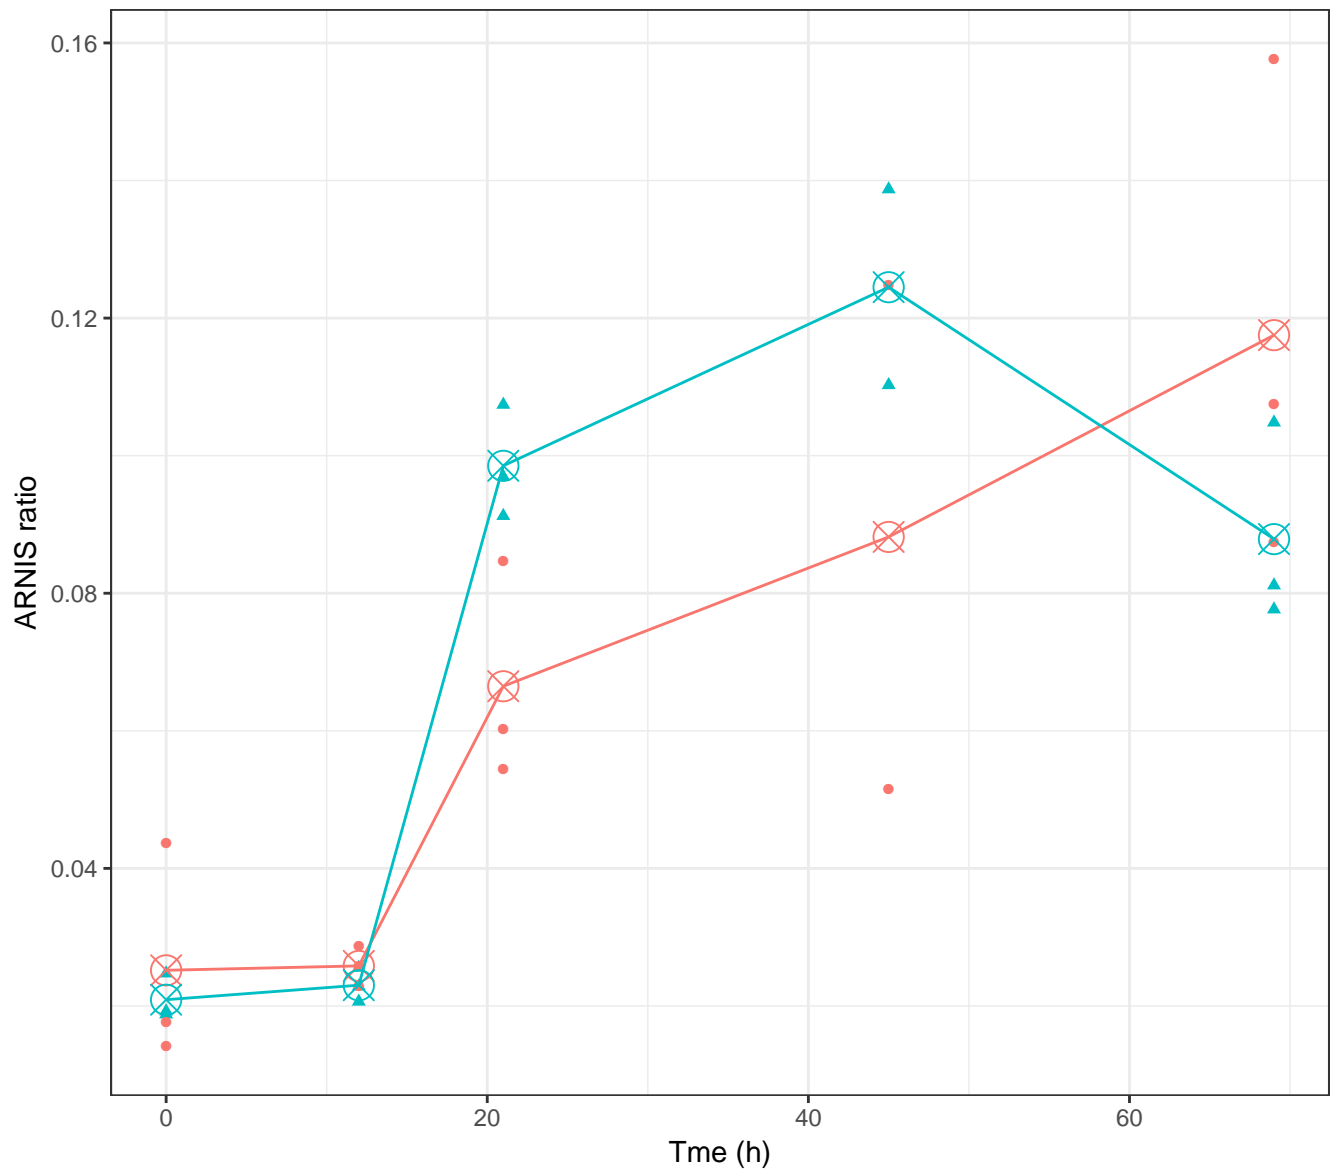

# OTU.142\_Actinobacteria\_clade\_acl.C

Treatment ⊗ Control ⊗ Filtered-1micron

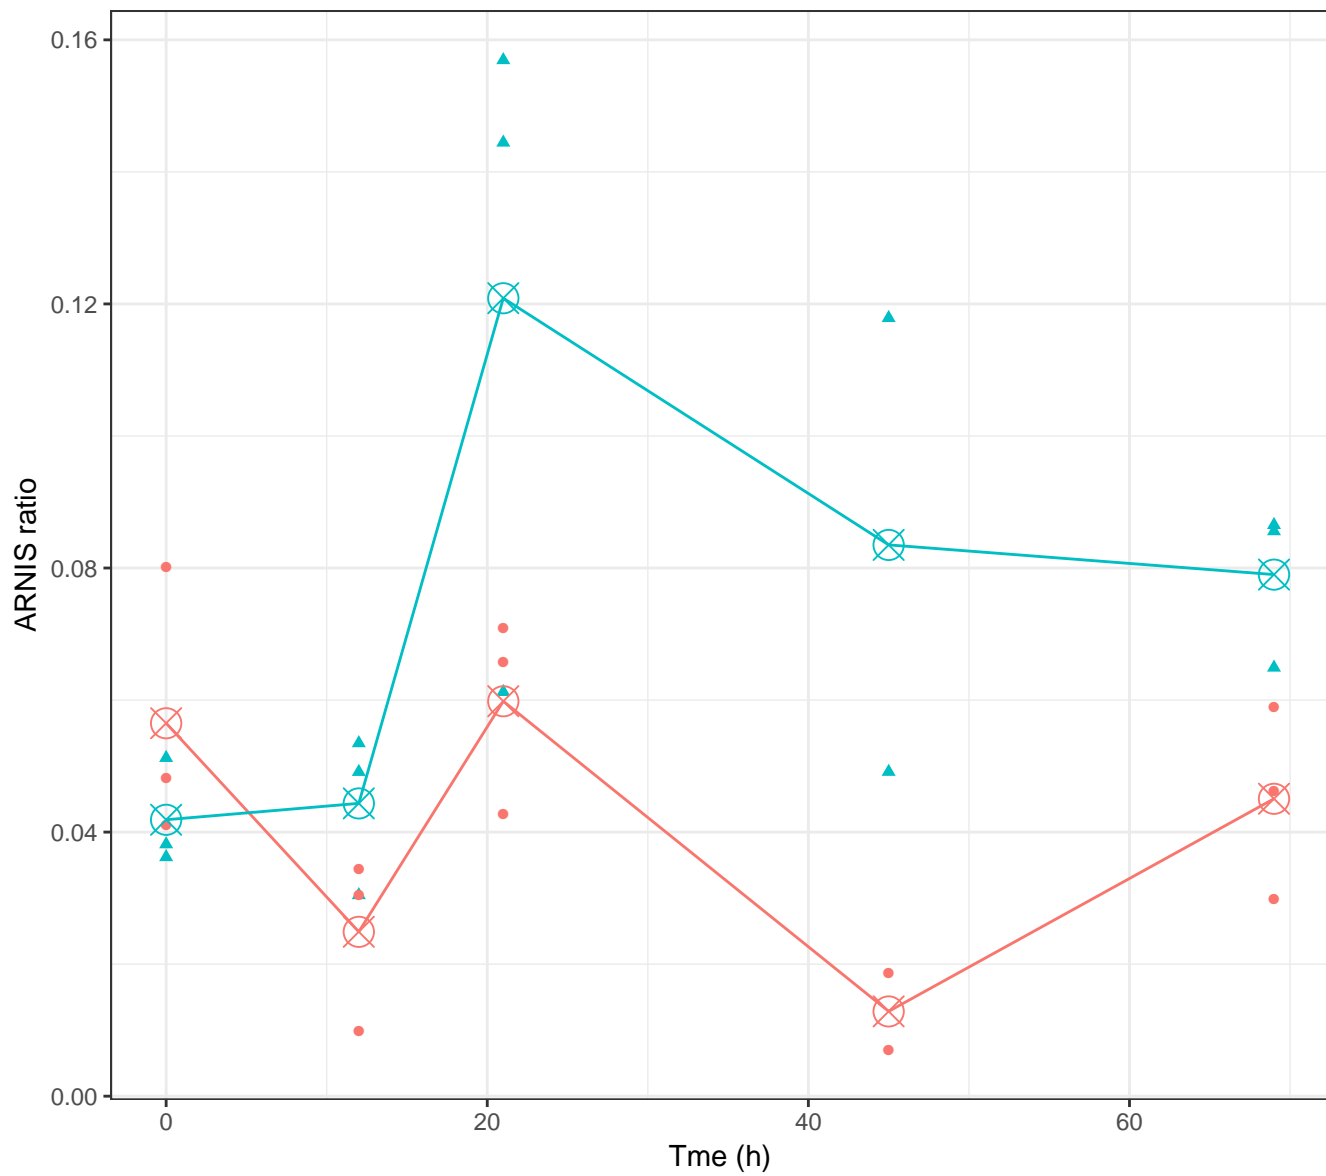

# OTU.147\_Chlorobi\_OPB56

Treatment ⊗ Control ⊗ Filtered-1micron

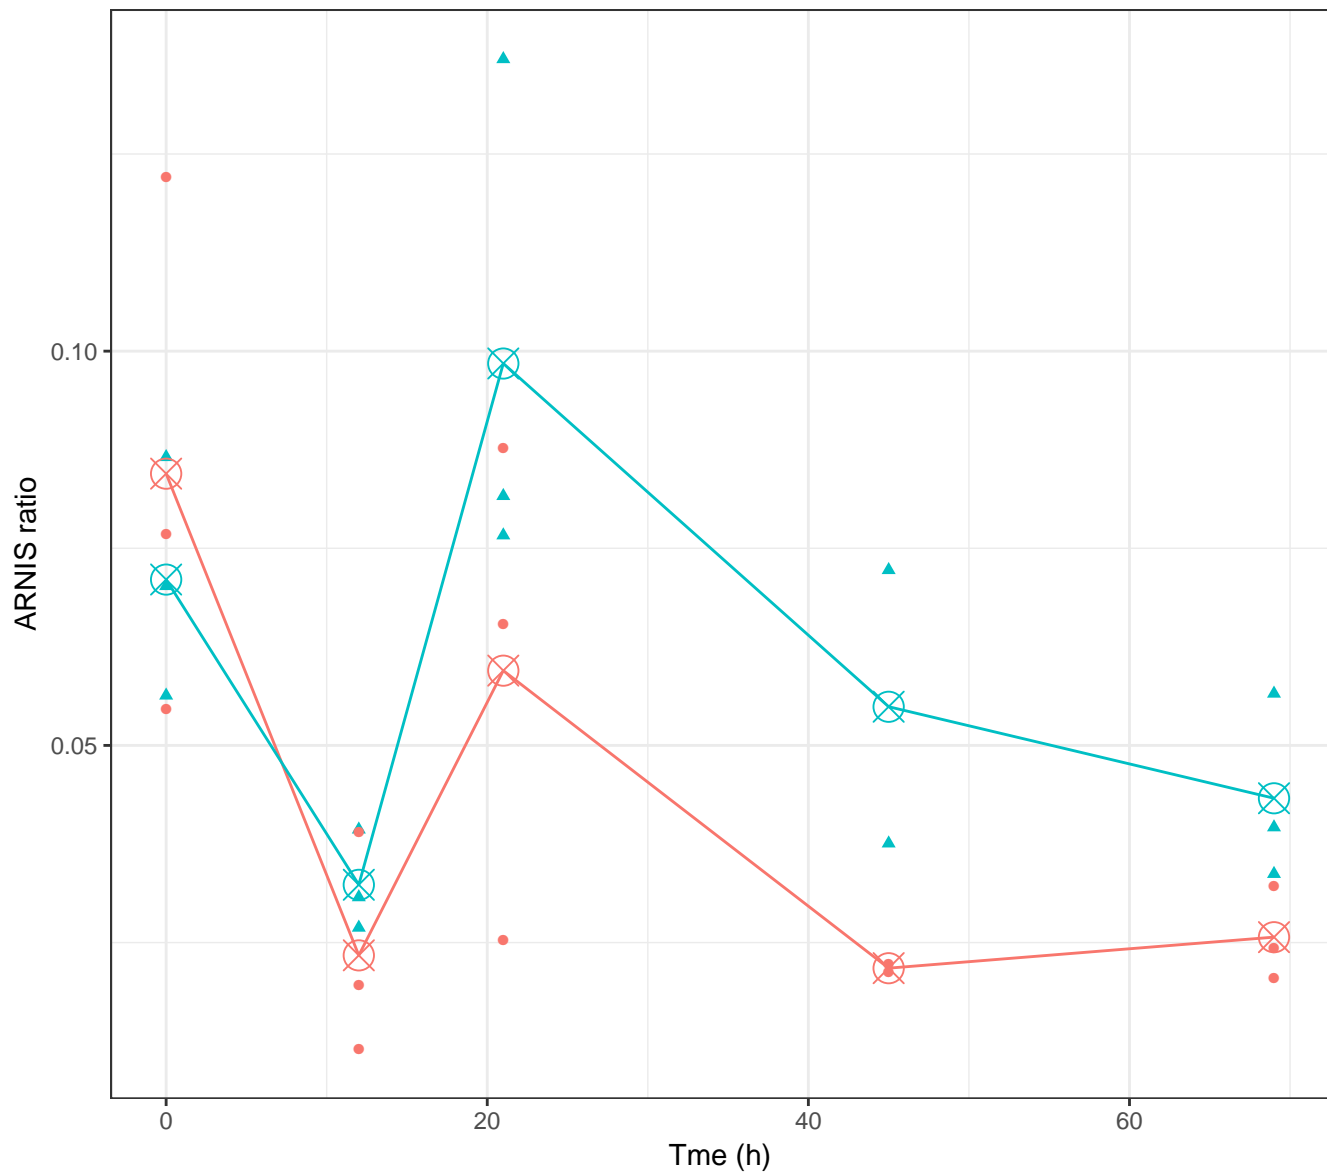

# OTU.145\_Bacteroidetes\_Chitinophagaceae

Treatment Control Filtered-1micron

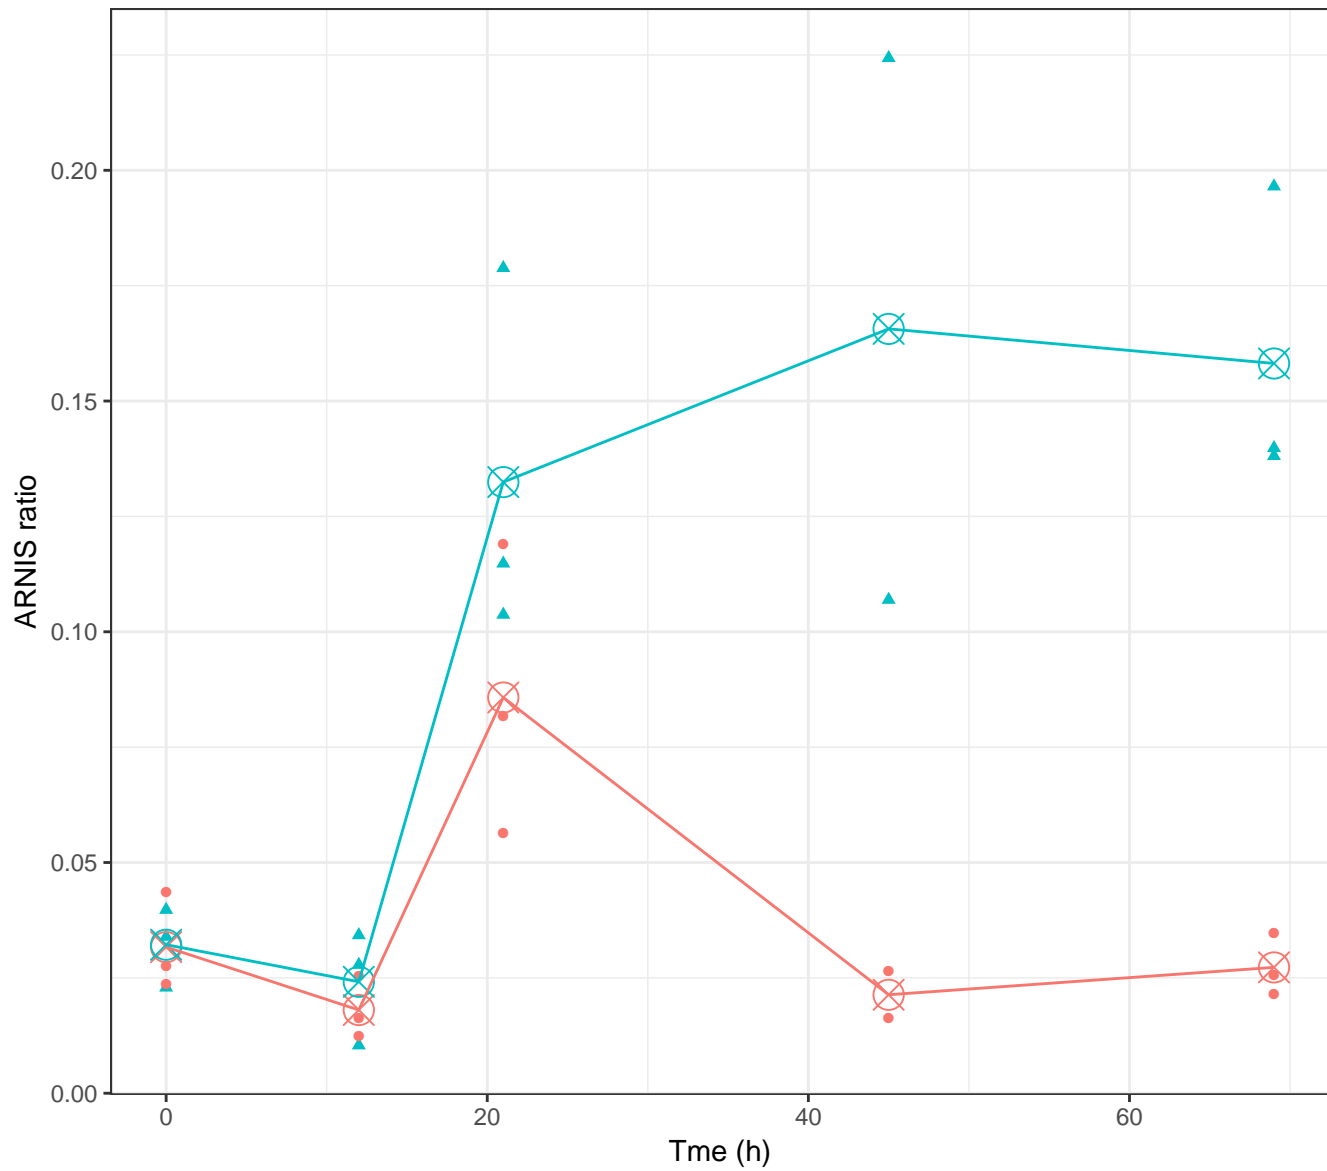

## OTU.188\_Planctomycetes\_Pirellula

Treatment Control Filtered-1micron

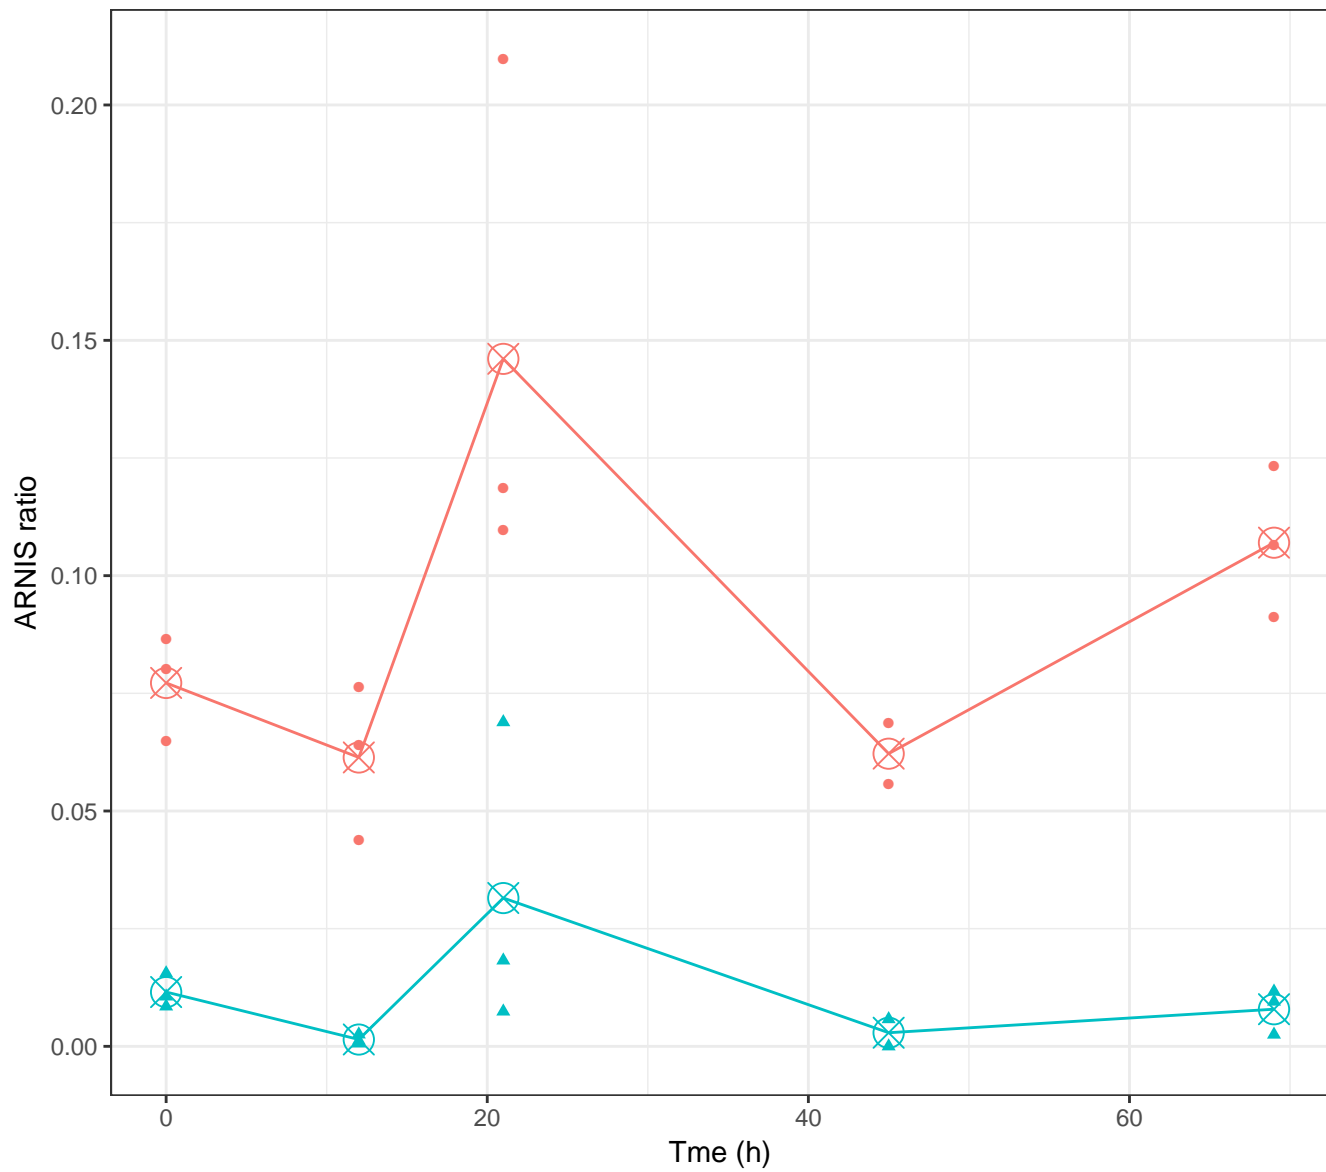

## OTU.146\_Bacteroidetes\_Chitinophagaceae

Treatment Control Filtered-1micron

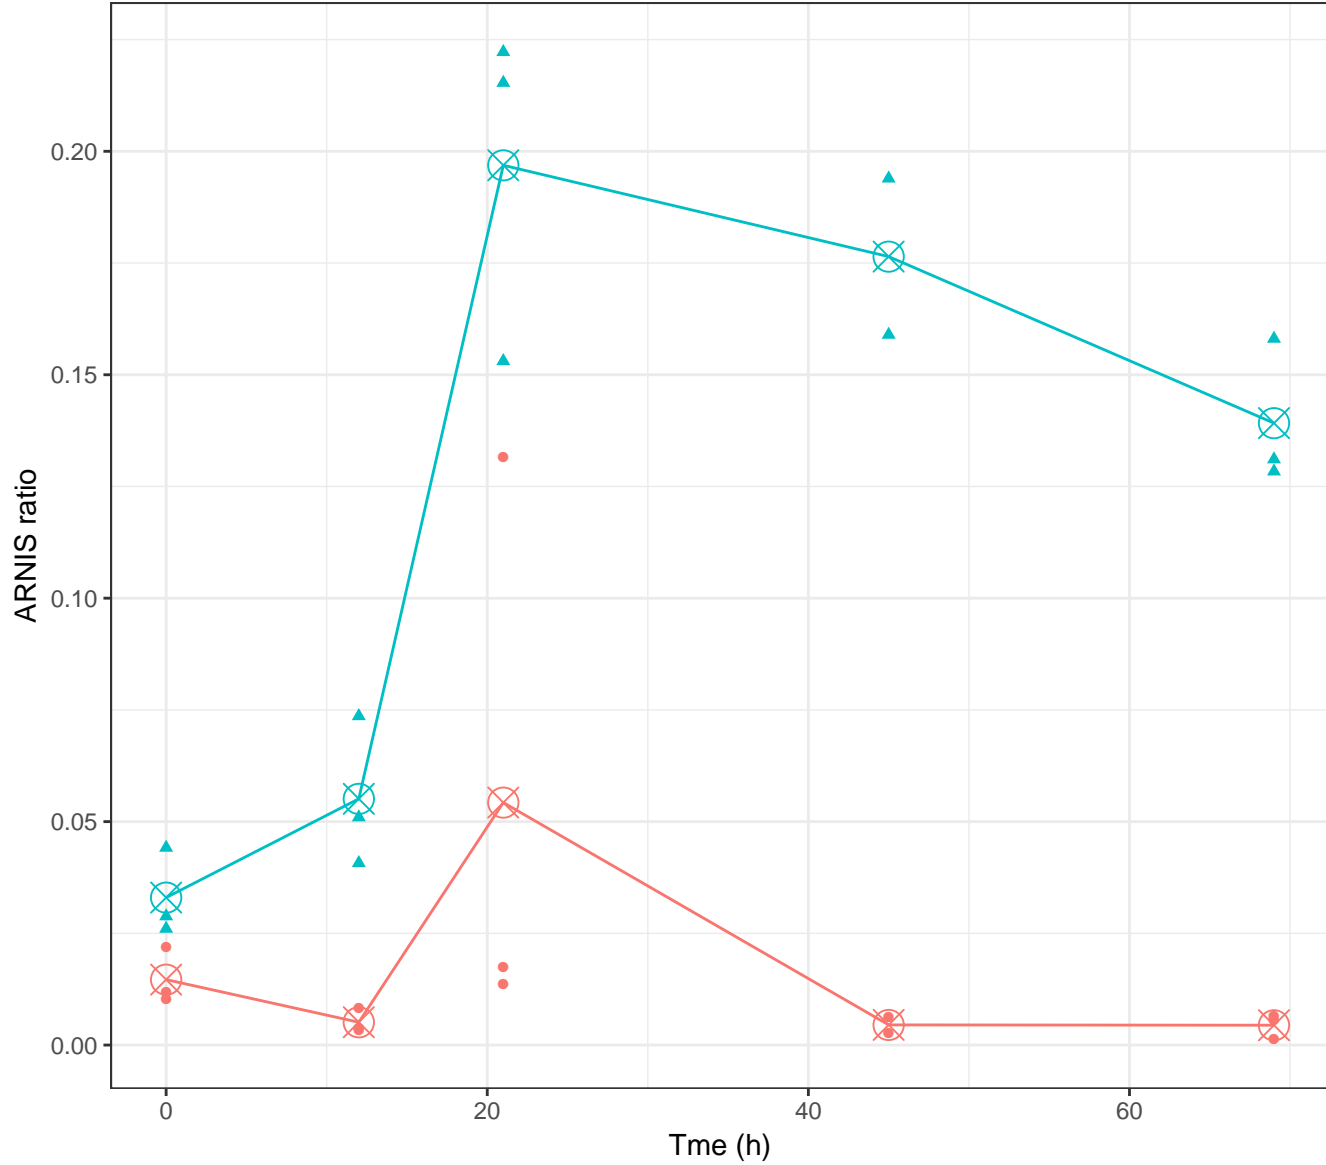

# OTU.155\_Alphaproteobacteria\_Rhizobiales\_alpha\_I\_cluster

Treatment Control Filtered-1micron

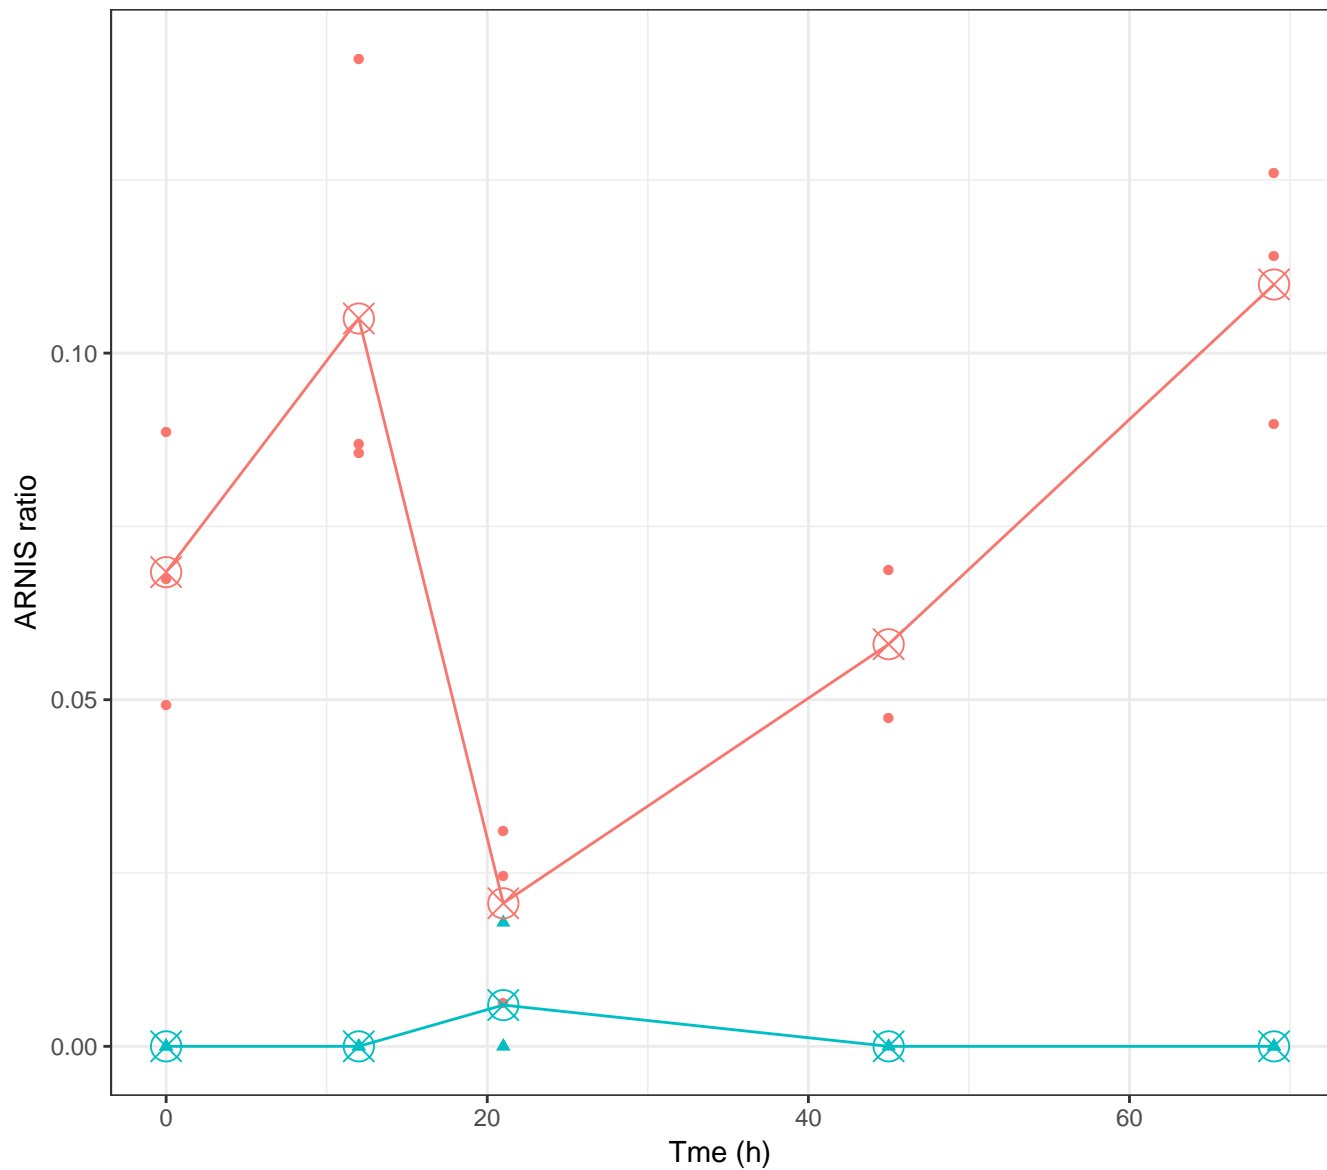

# OTU.160\_Verrucomicrobia\_Verrucomicrobiaceae

Treatment  Control  Filtered-1micron

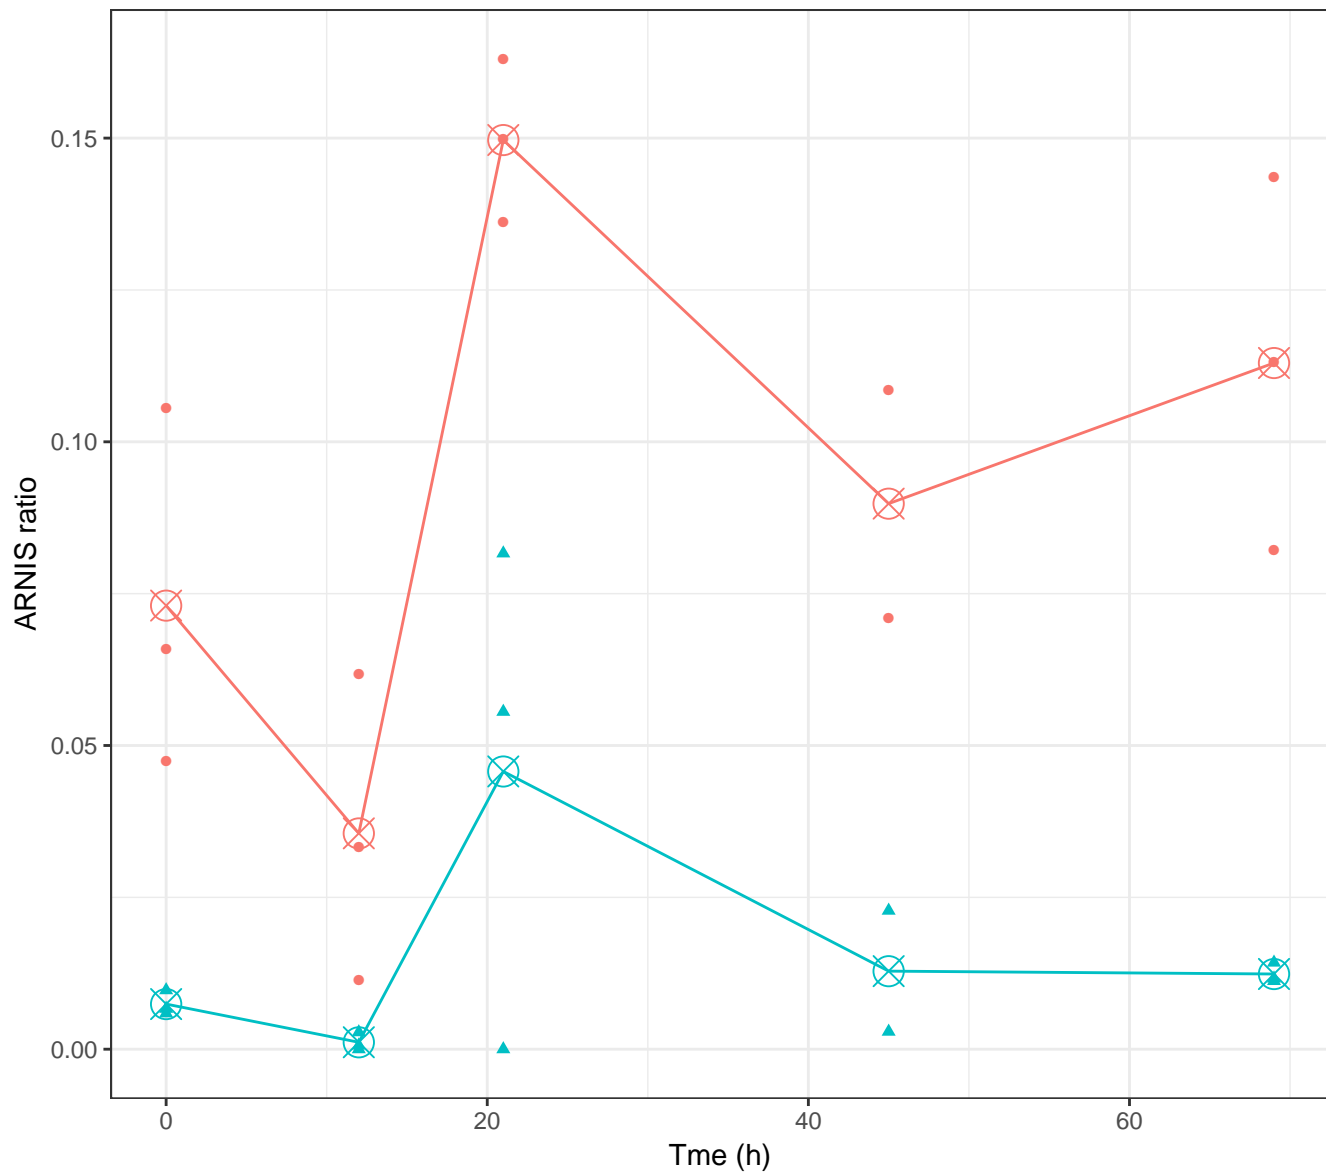



# OTU.170\_Planctomycetes\_Planctomyces

Treatment Control Filtered-1micron

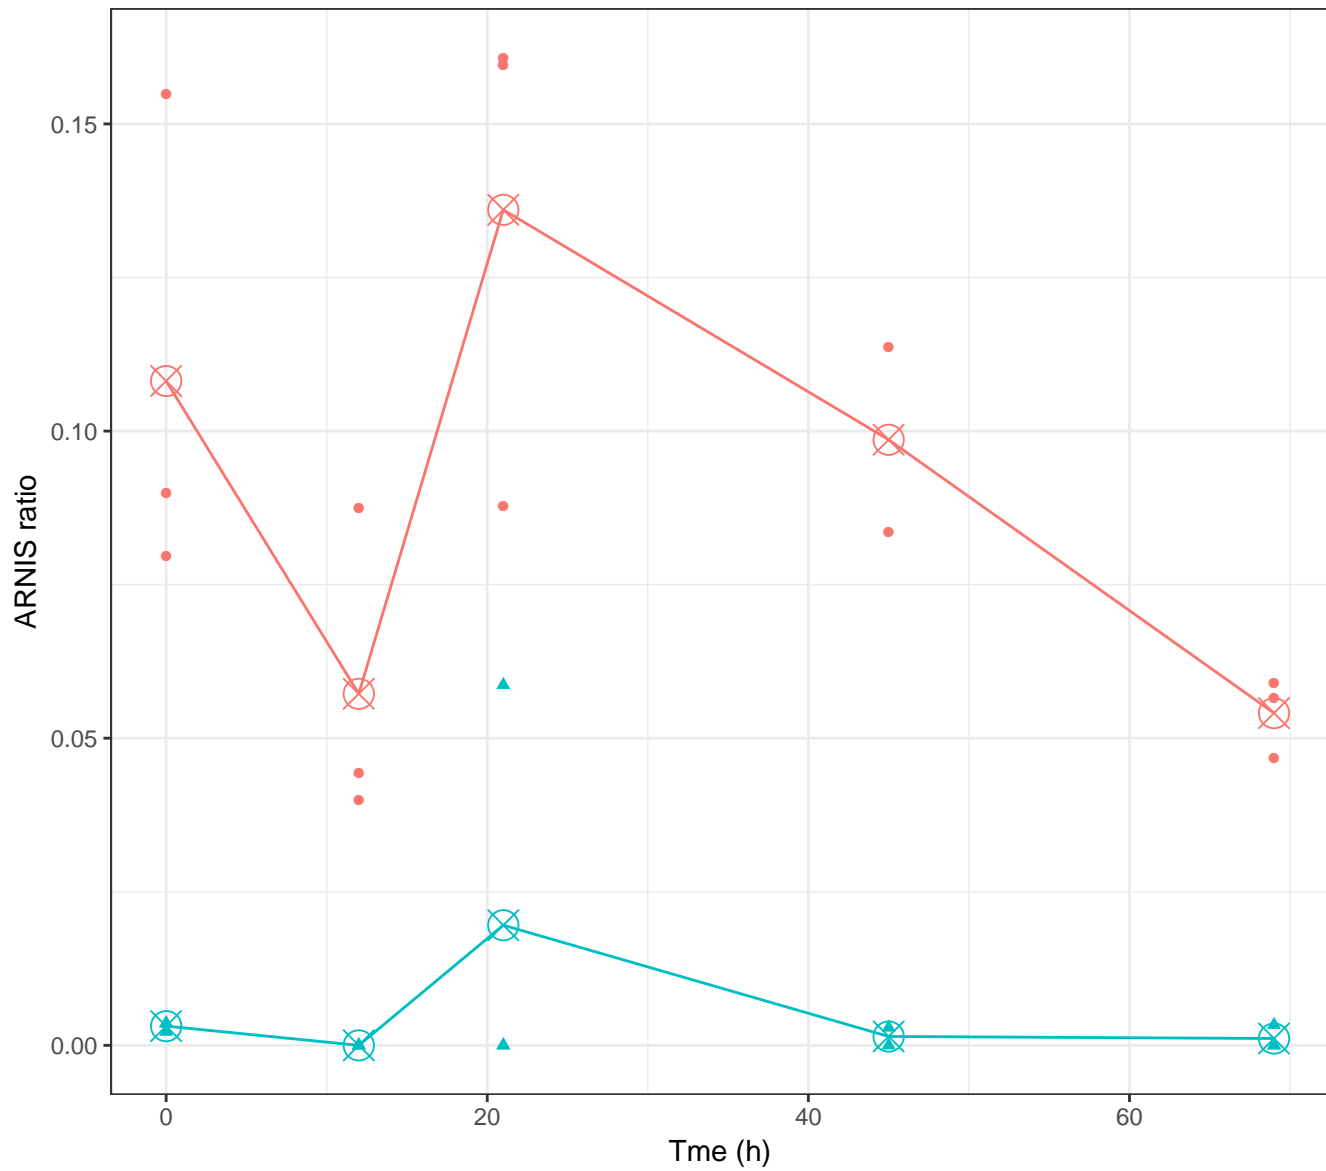

## OTU.156\_Bacteroidetes\_NS11.12\_marine\_group

Treatment  Control  Filtered-1micron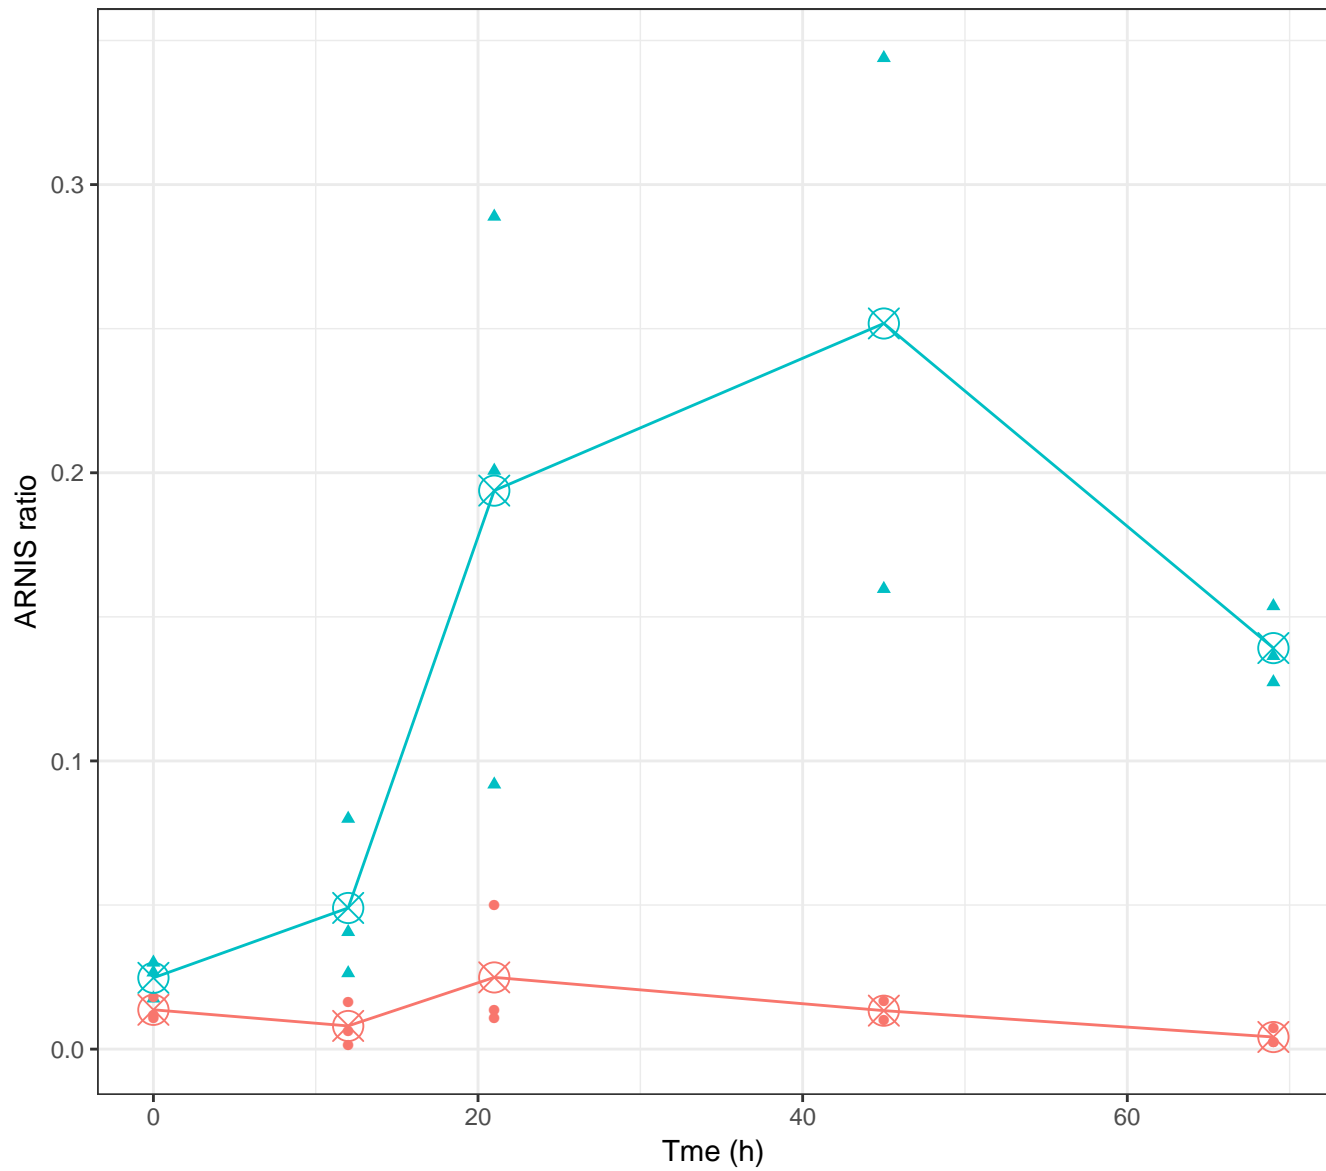

## OTU.1912\_Bacteroidetes\_Pedobacter

Treatment Control Filtered-1micron

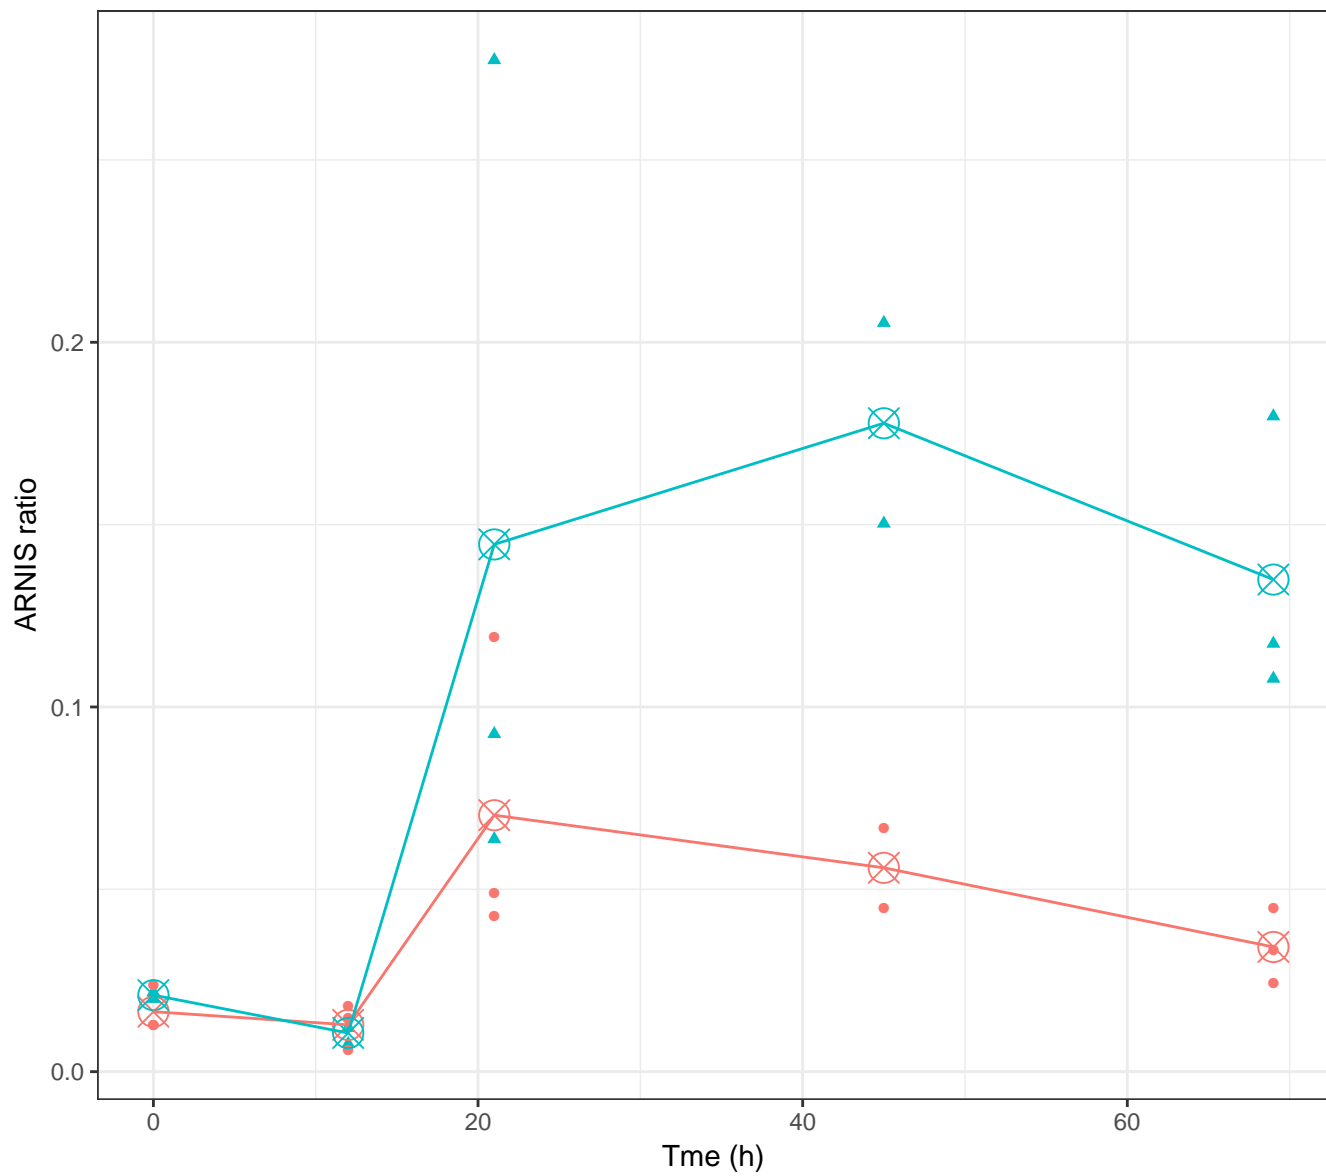

## OTU.217\_Gammaproteobacteria\_Legionella

Treatment Control Filtered-1micron

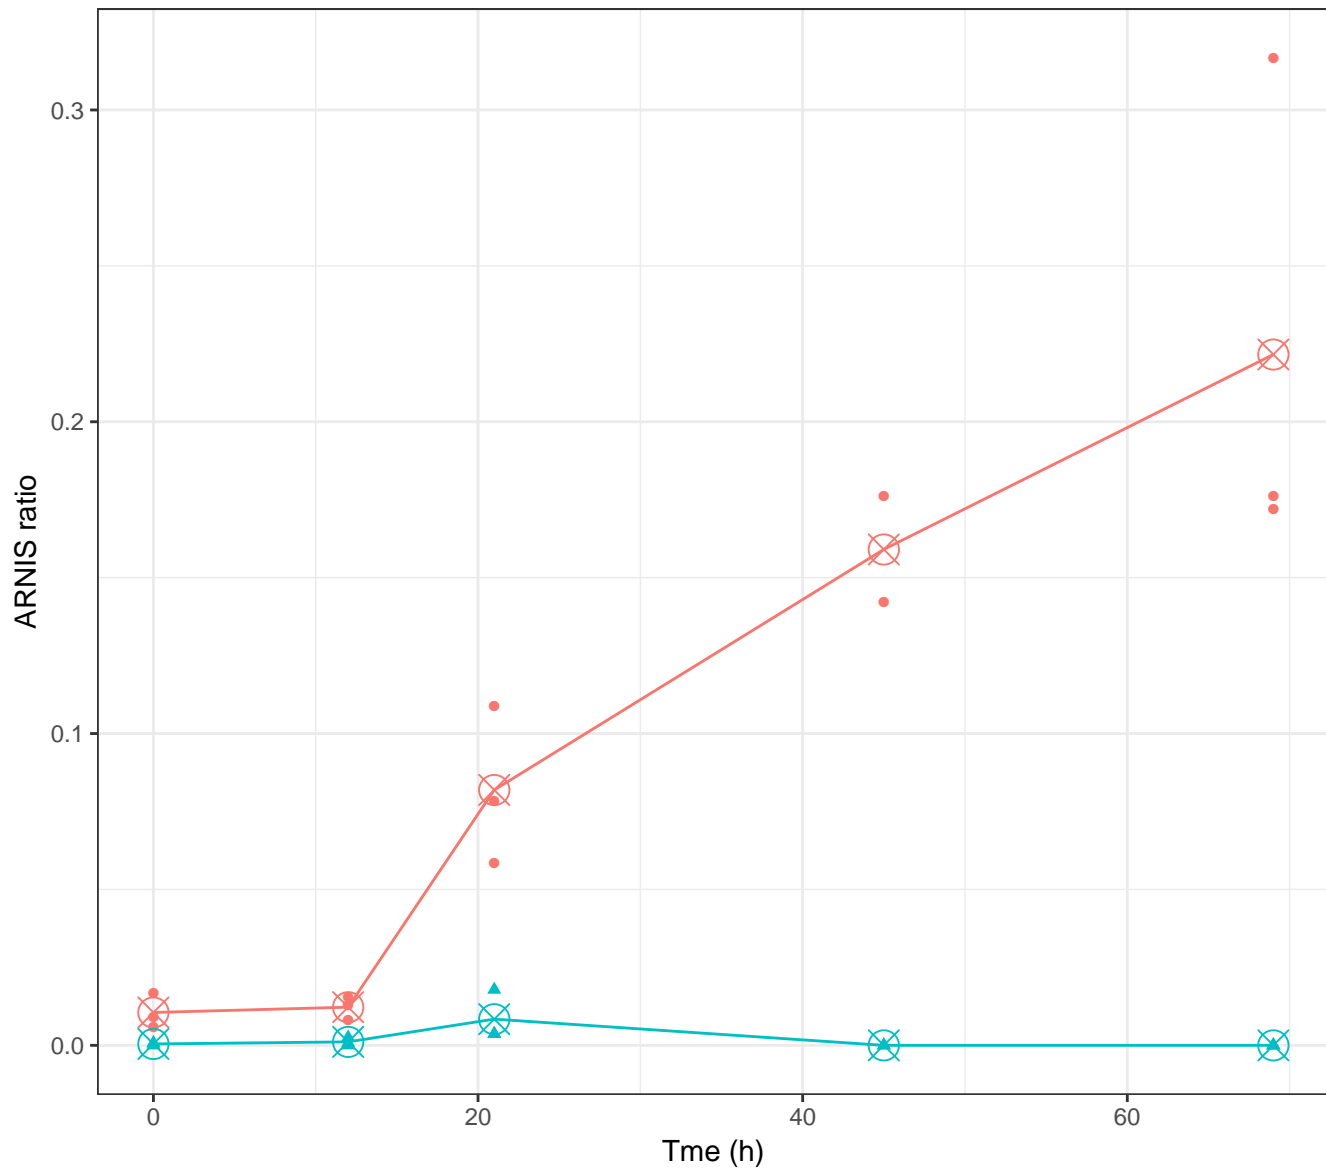

# OTU.39\_Actinobacteria\_acll.luna\_MWH.Ta3

Treatment ⊗ Control ⊗ Filtered-1micron

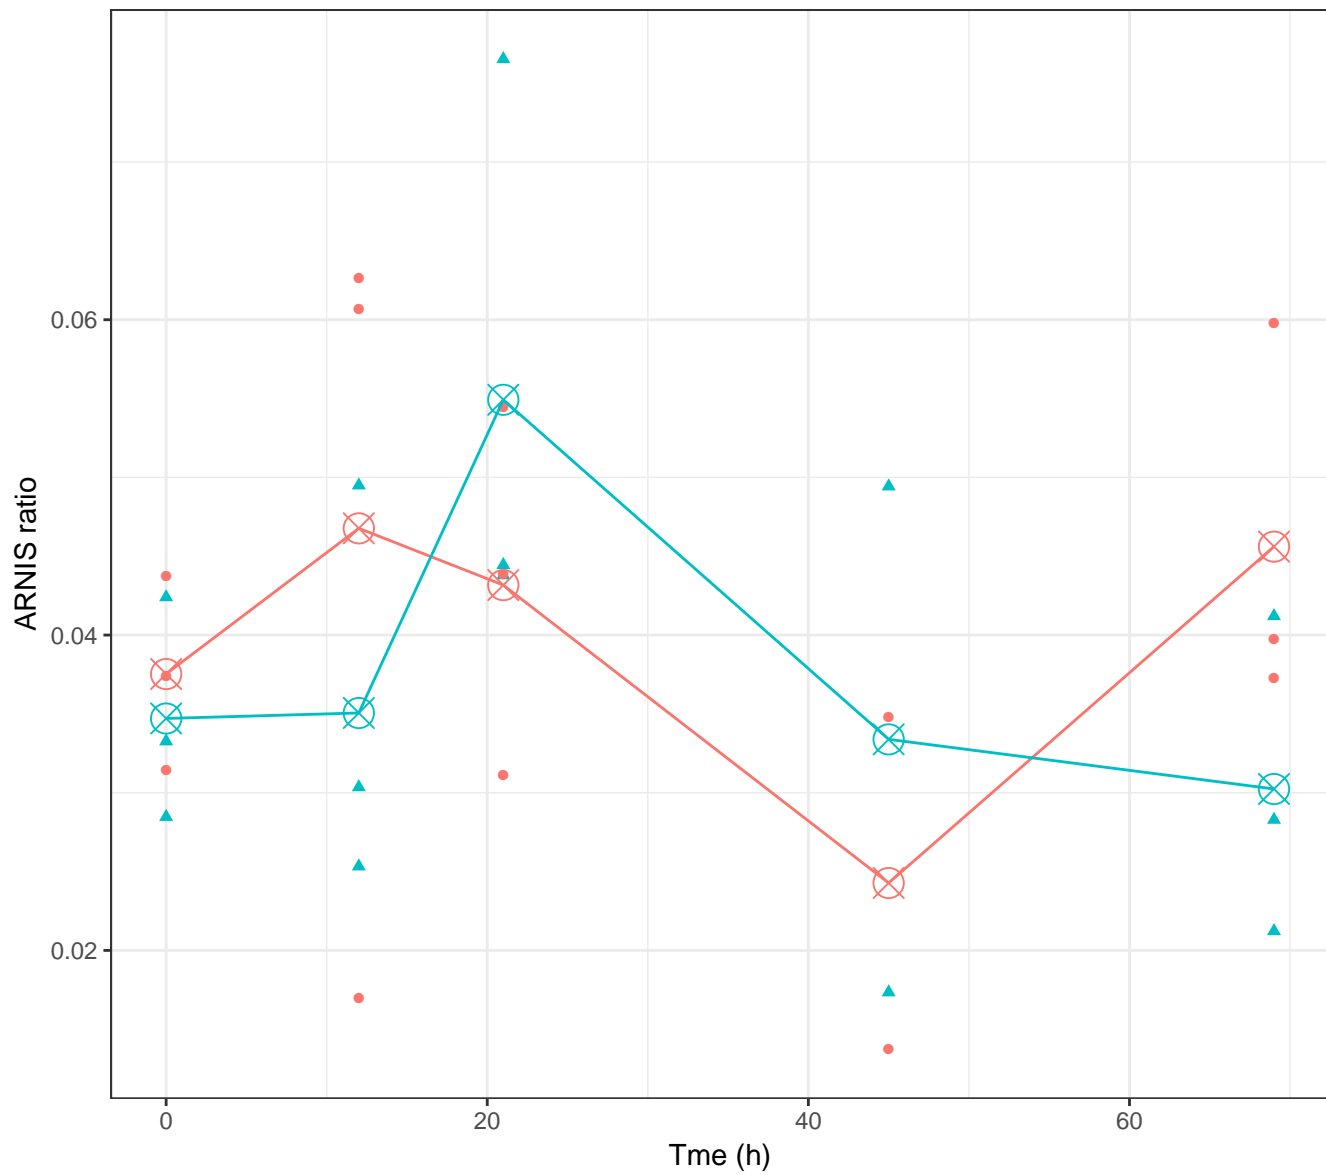

# OTU.165\_Planctomyces\_OM190

Treatment Control Filtered-1micron

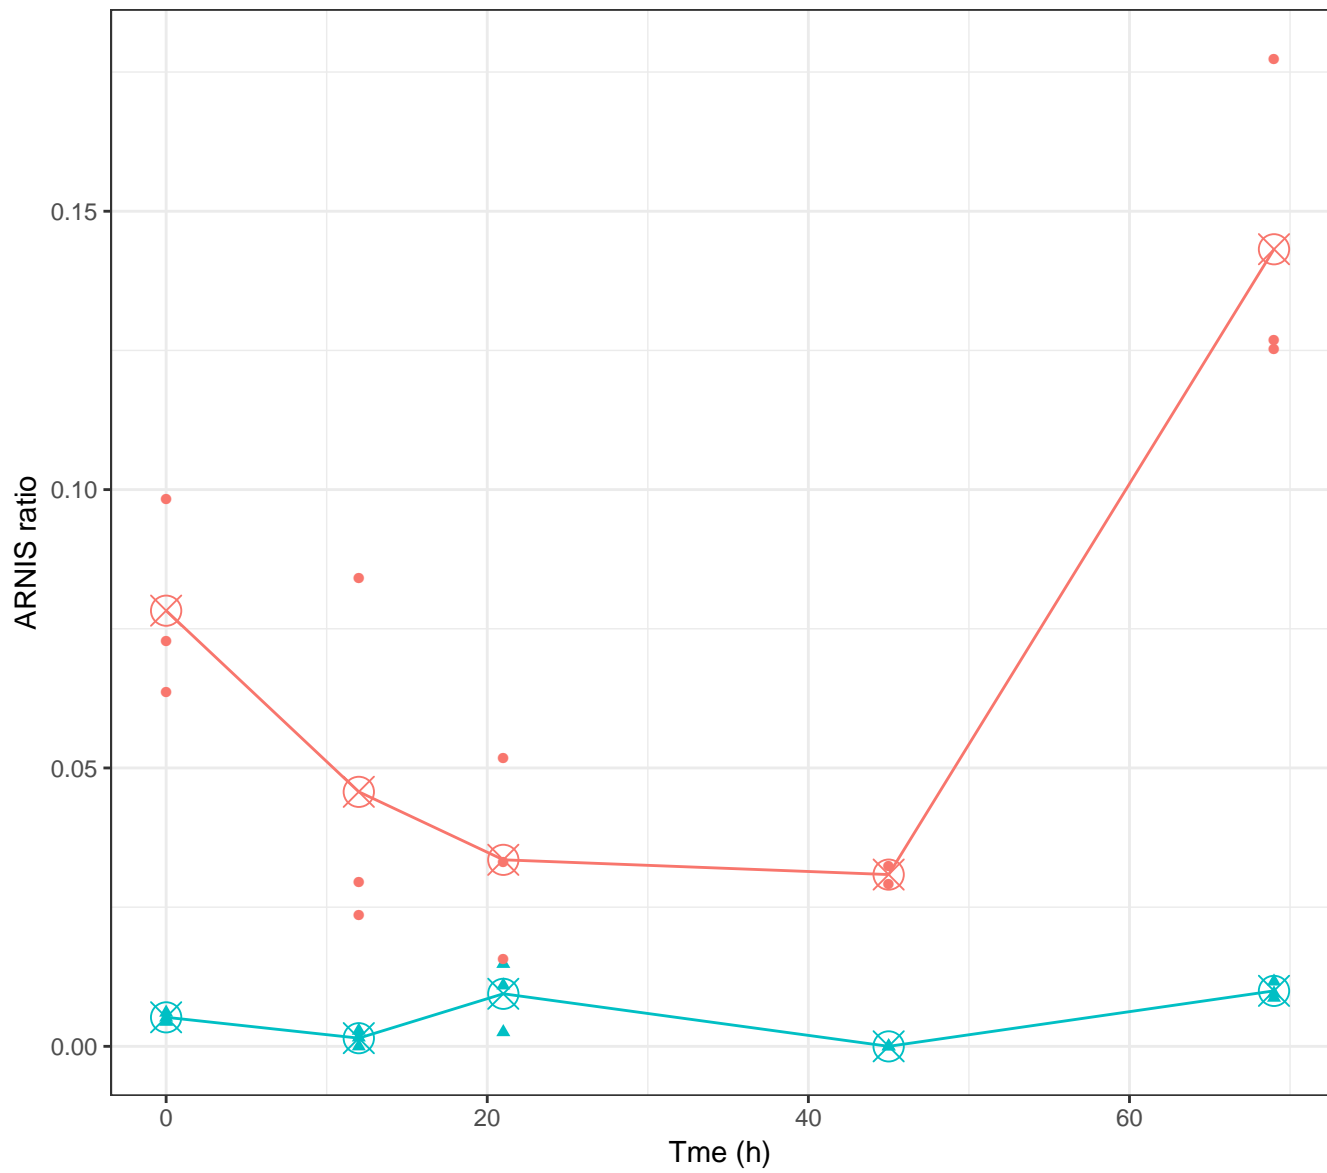

# OTU.206\_Actinobacteria\_Candidatus\_Aquiluna

Treatment ⊗ Control ⊗ Filtered-1micron

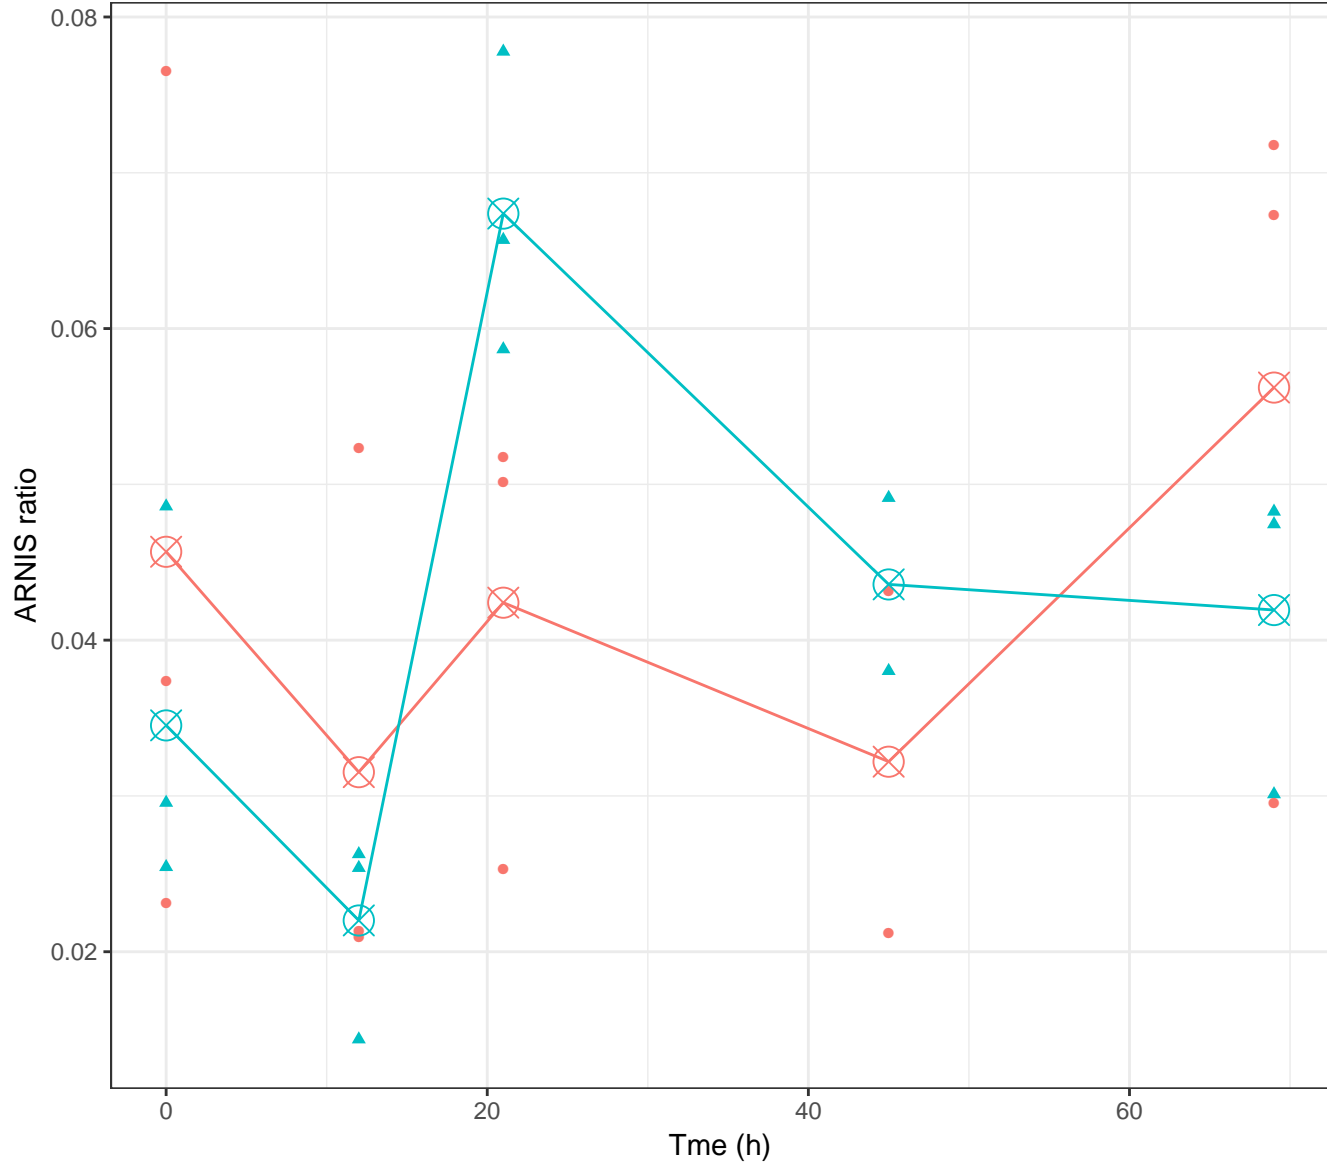

# OTU.3957\_Bacteroidetes\_Chitinophagaceae

Treatment Control Filtered-1micron

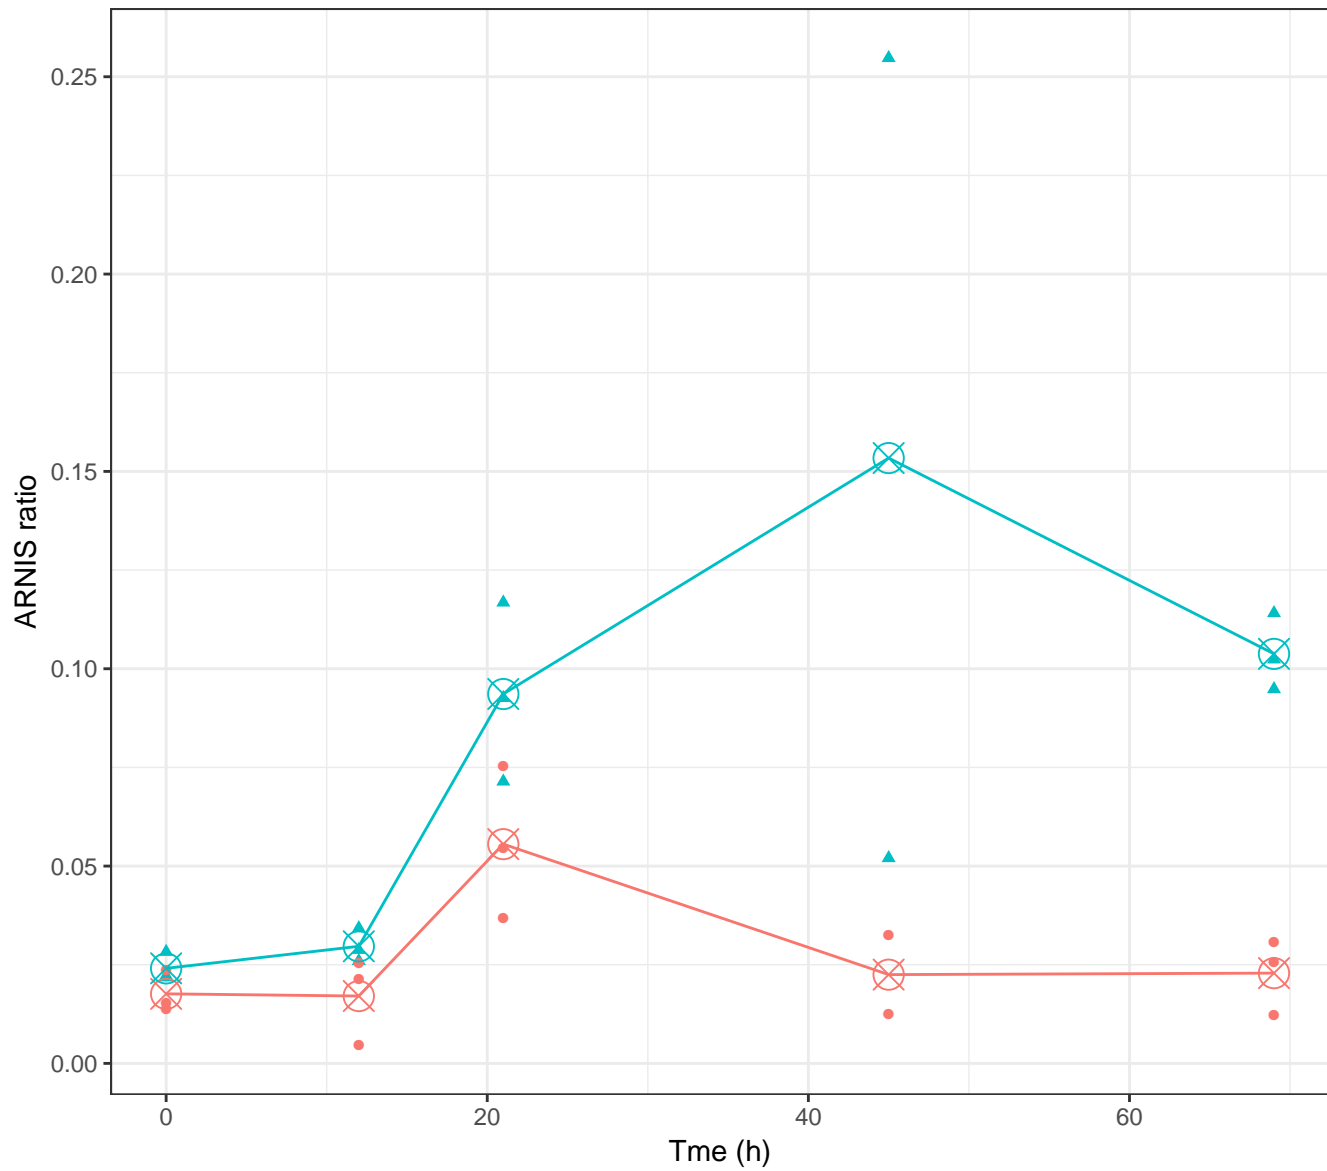



# OTU.183\_Verrucomicrobia\_Verrucomicrobiaceae

Treatment  Control  Filtered-1micron

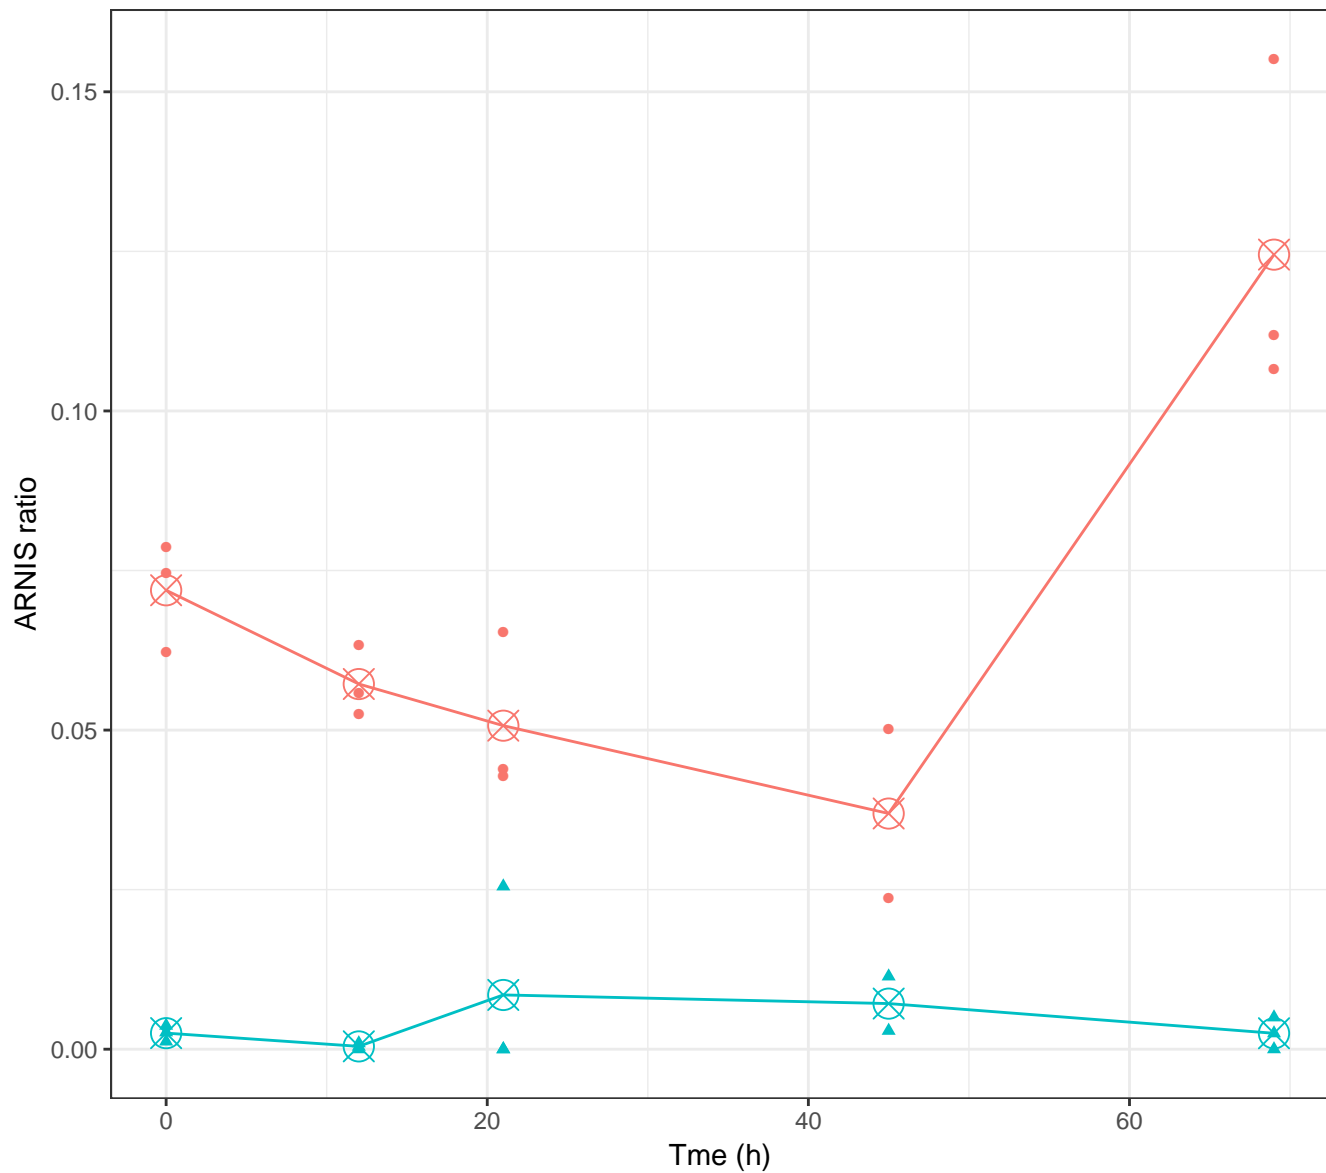

# OTU.45\_Alphaproteobacteria\_SAR11clade\_LD12\_freshwater\_rgroup

Treatment ⊗ Control ⊗ Filtered-1micron

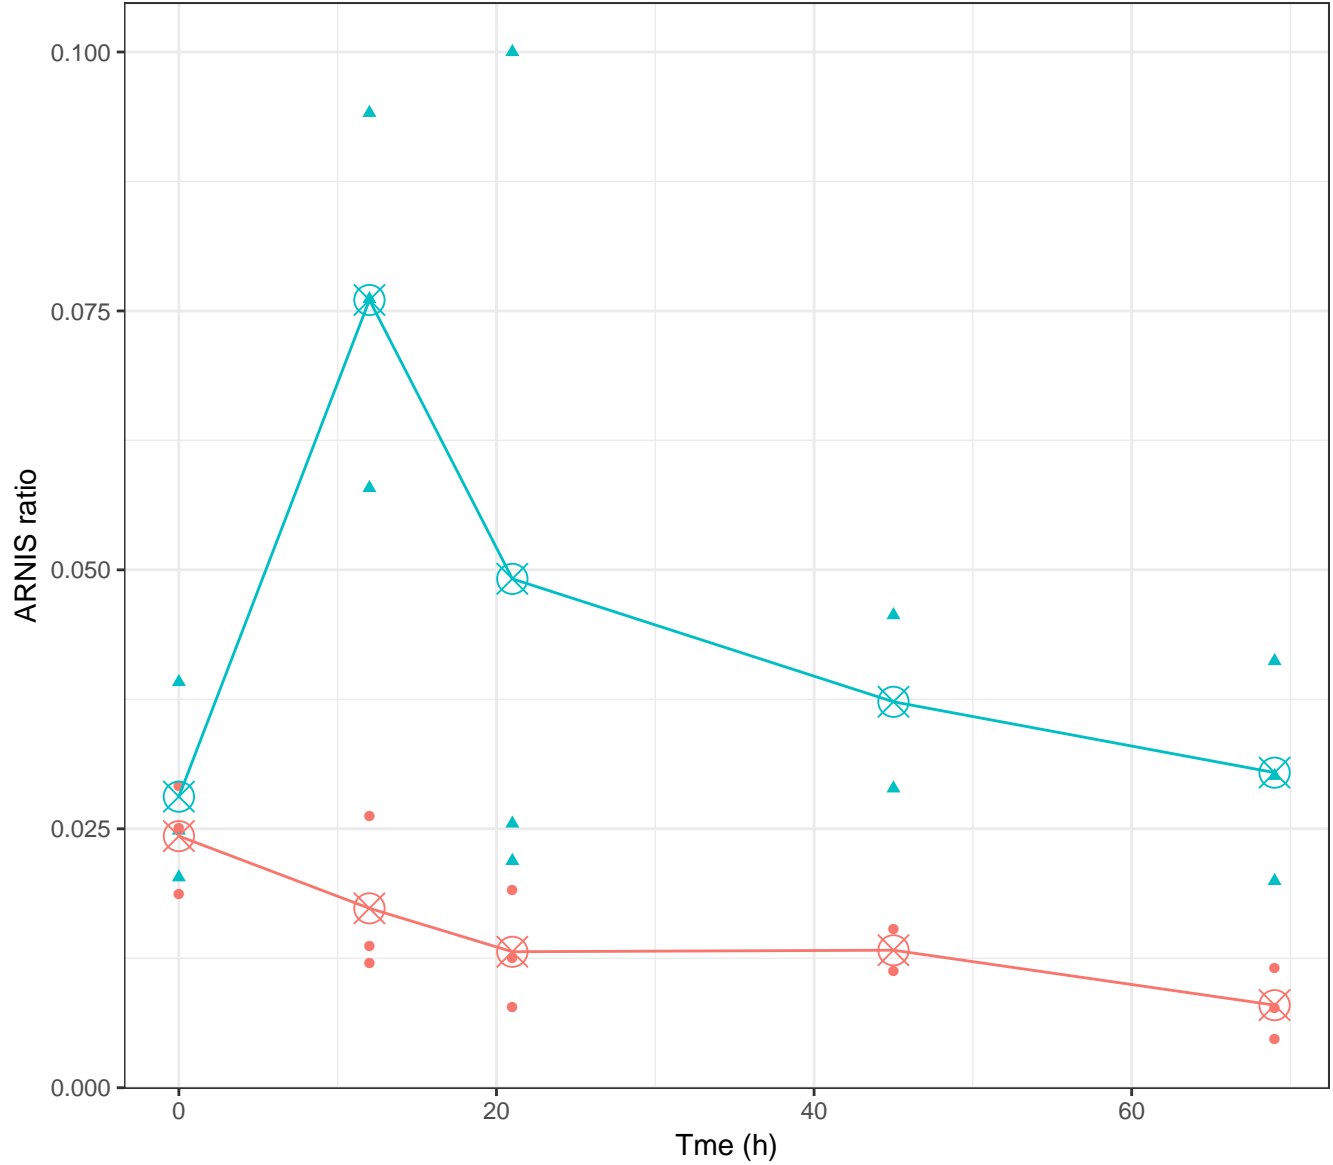

## OTU.193\_Verrucomicrobia\_Opitutus

Treatment  Control  Filtered-1micron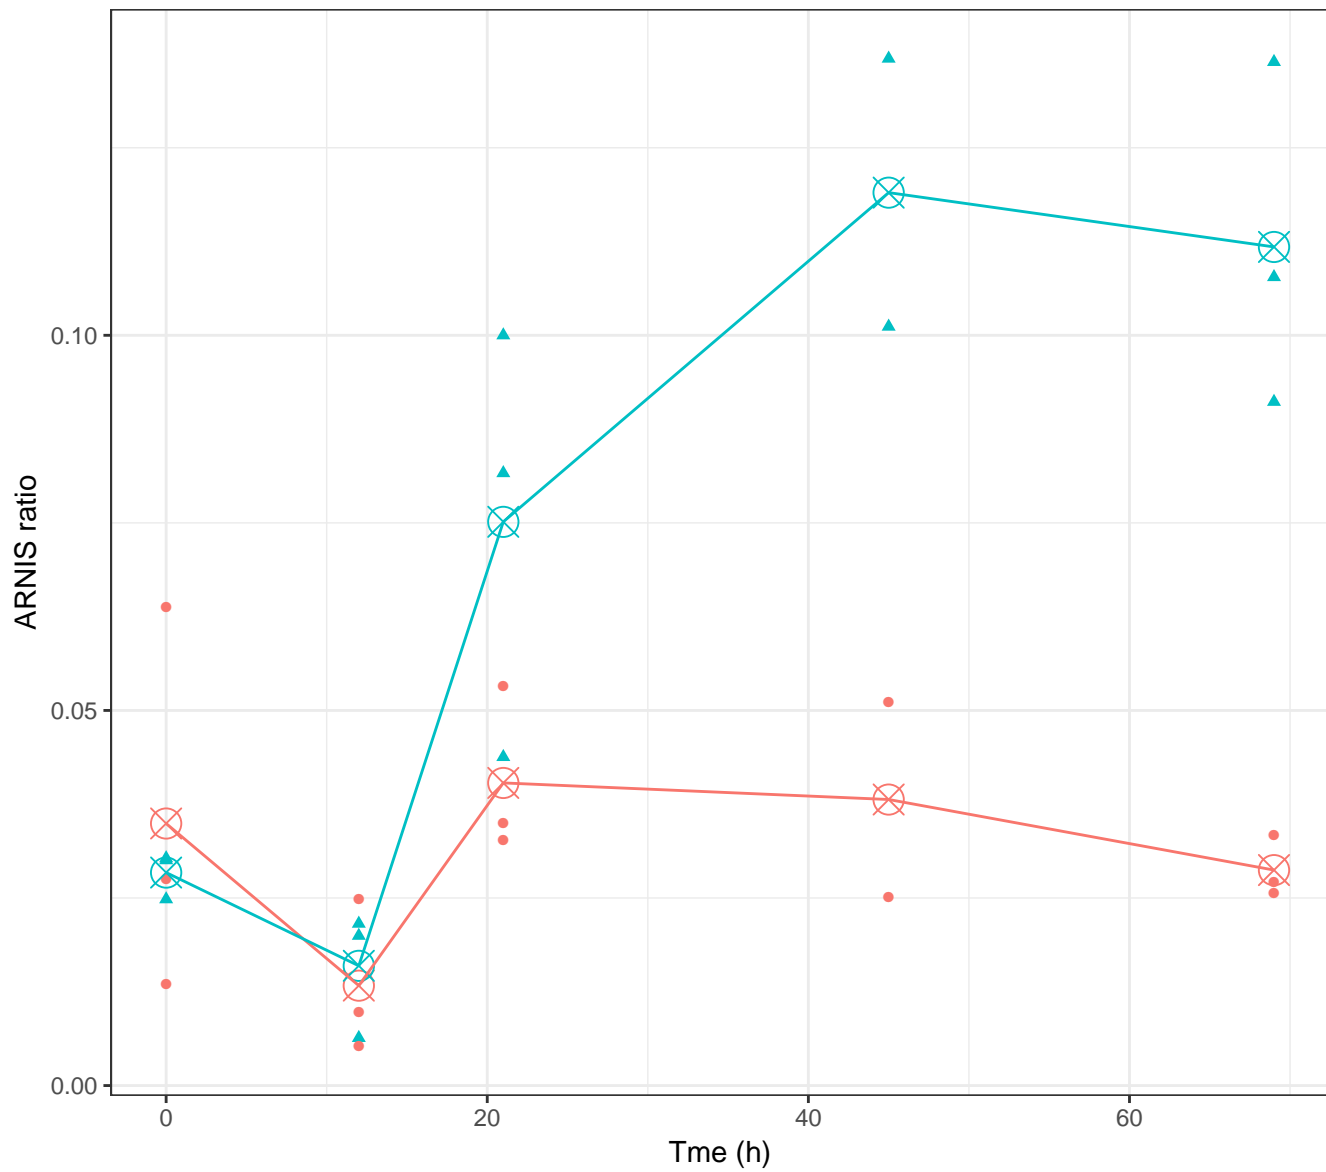

# OTU.117\_Bacteroidetes\_Pedobacter

Treatment Control Filtered-1micron

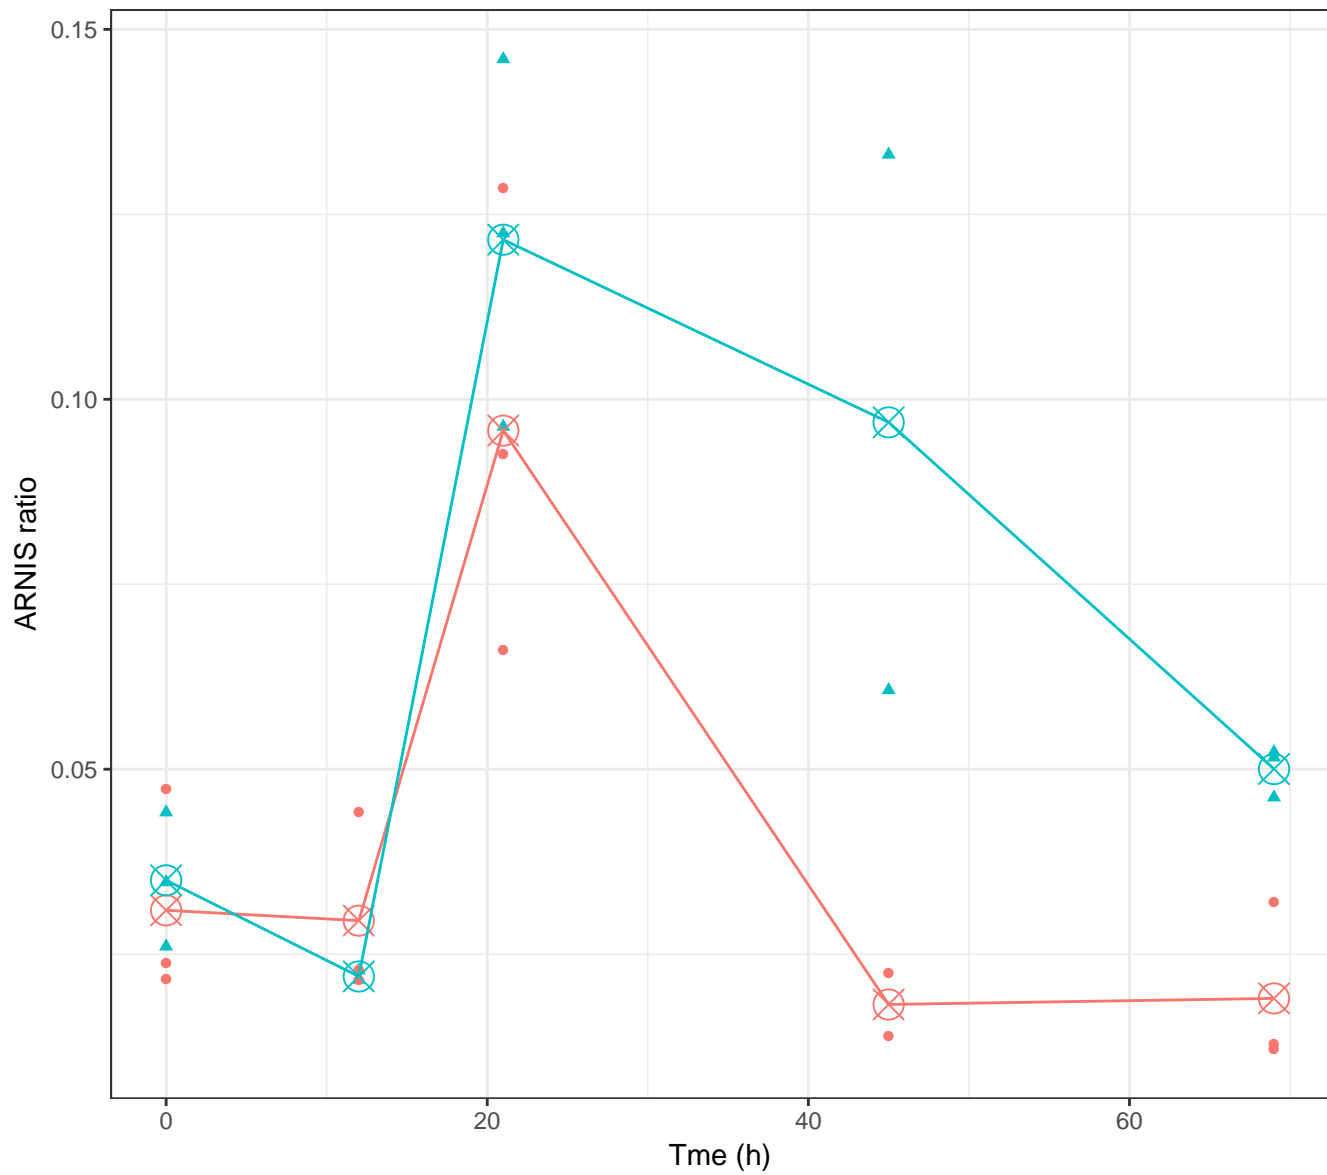

# OTU.216\_Alphaproteobacteria\_Roseomonas

Treatment  Control  Filtered-1micron

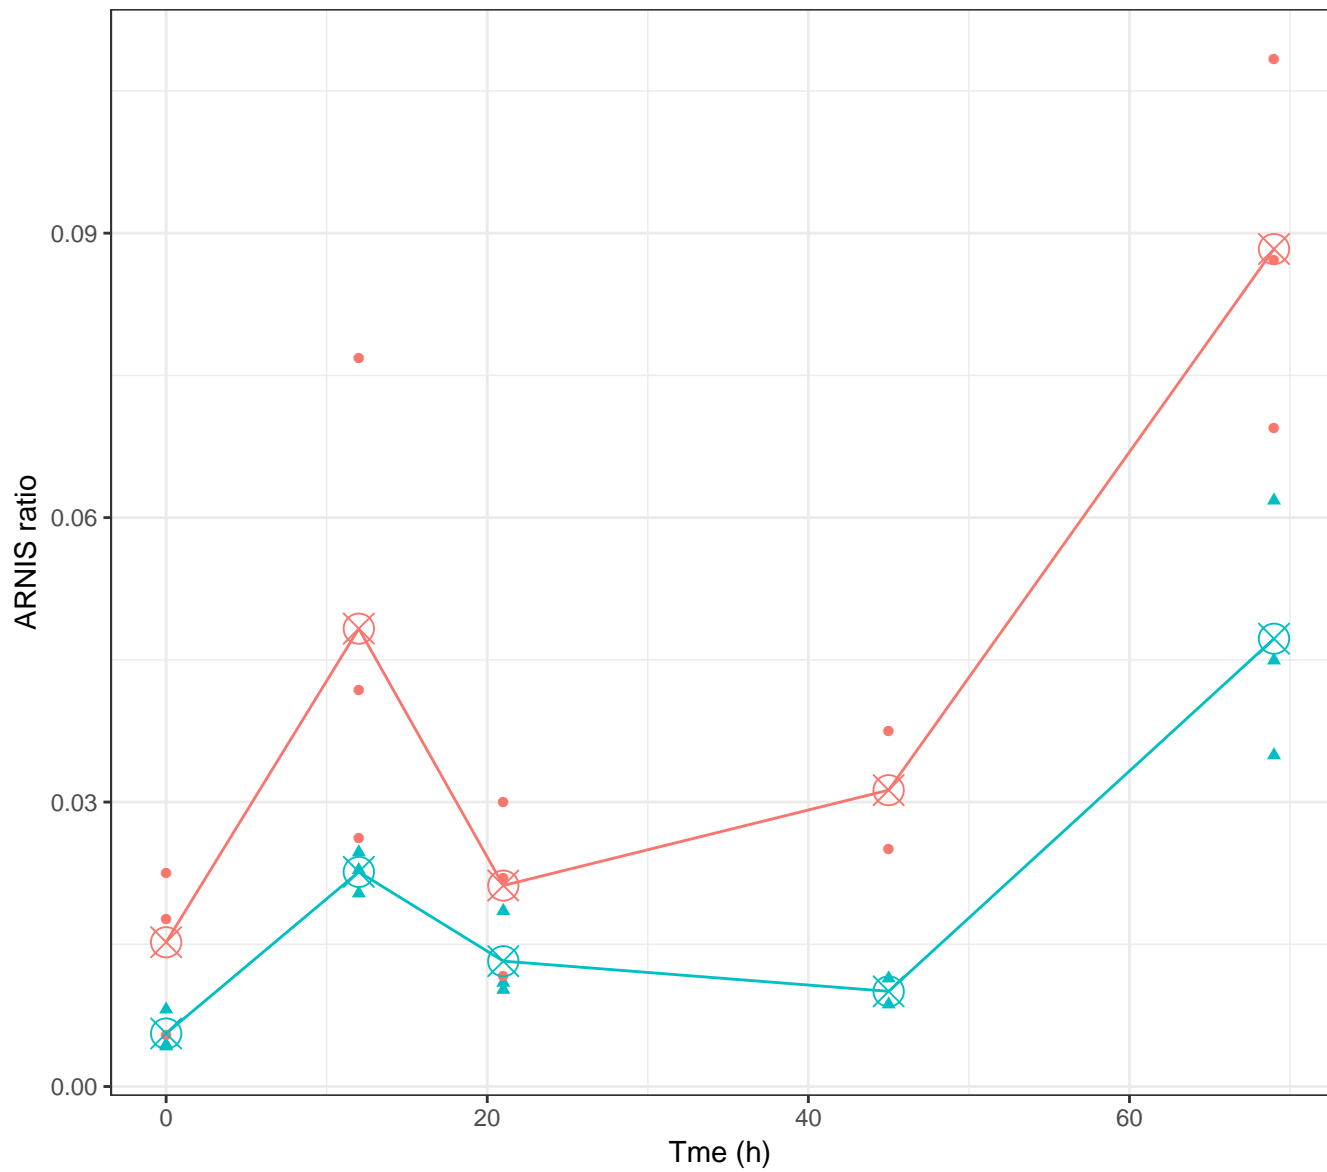

## OTU.177\_Planctomycetes\_Pirellula

Treatment Control Filtered-1micron

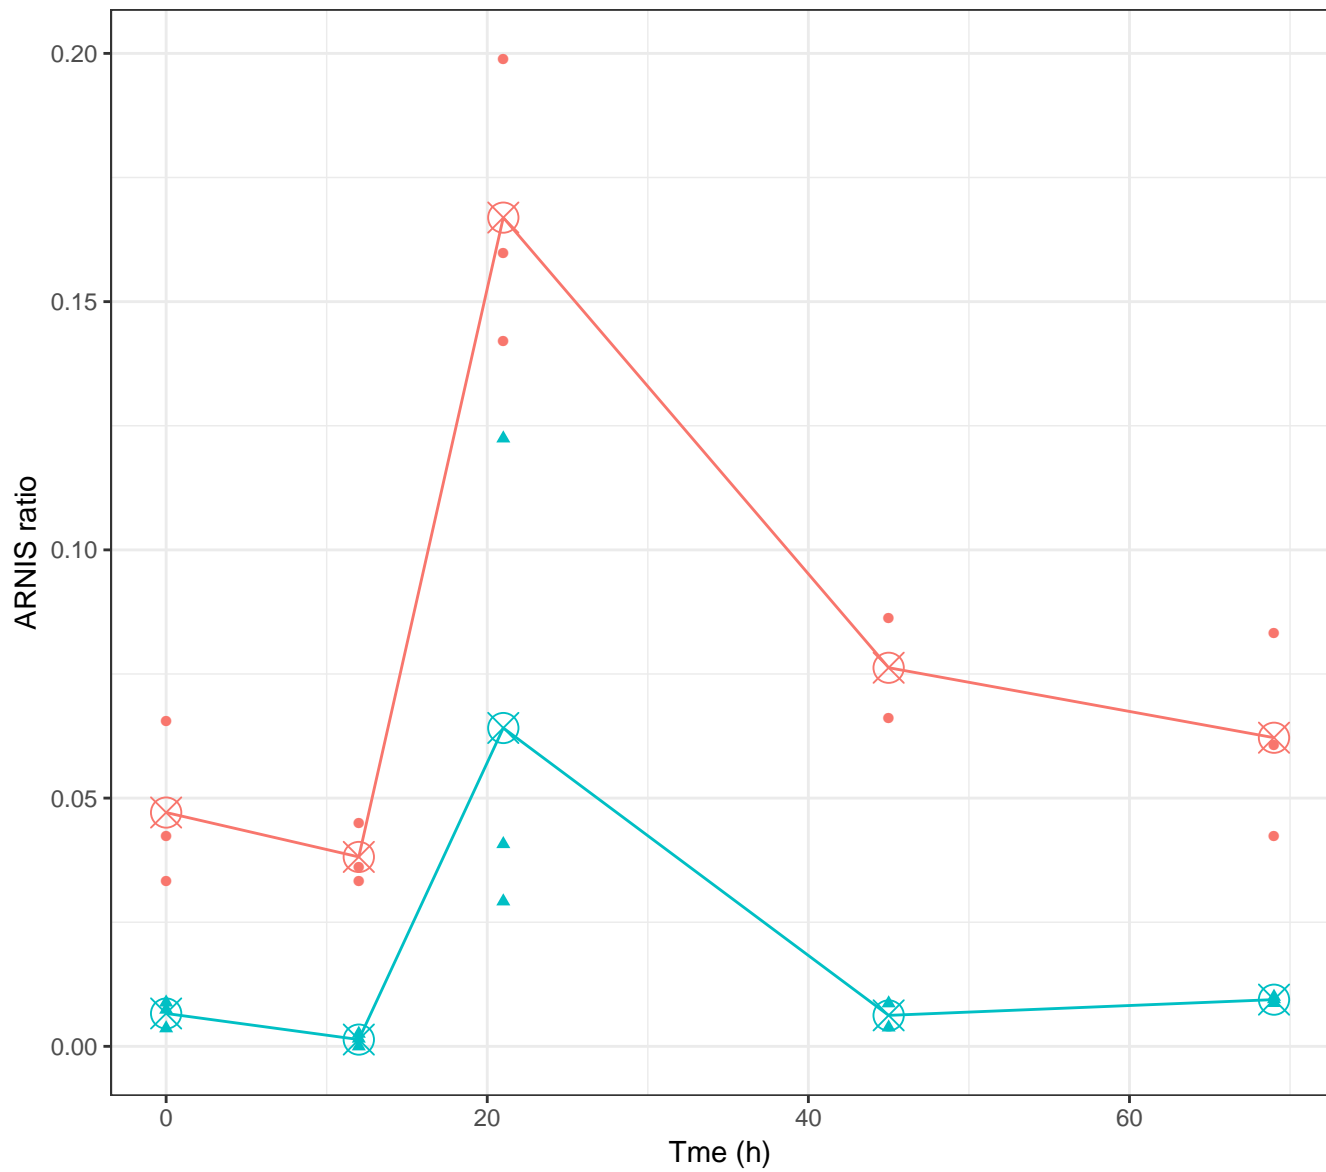

# OTU.1270\_Betaproteobacteria\_Comamonadaceae

Treatment Control Filtered-1micron

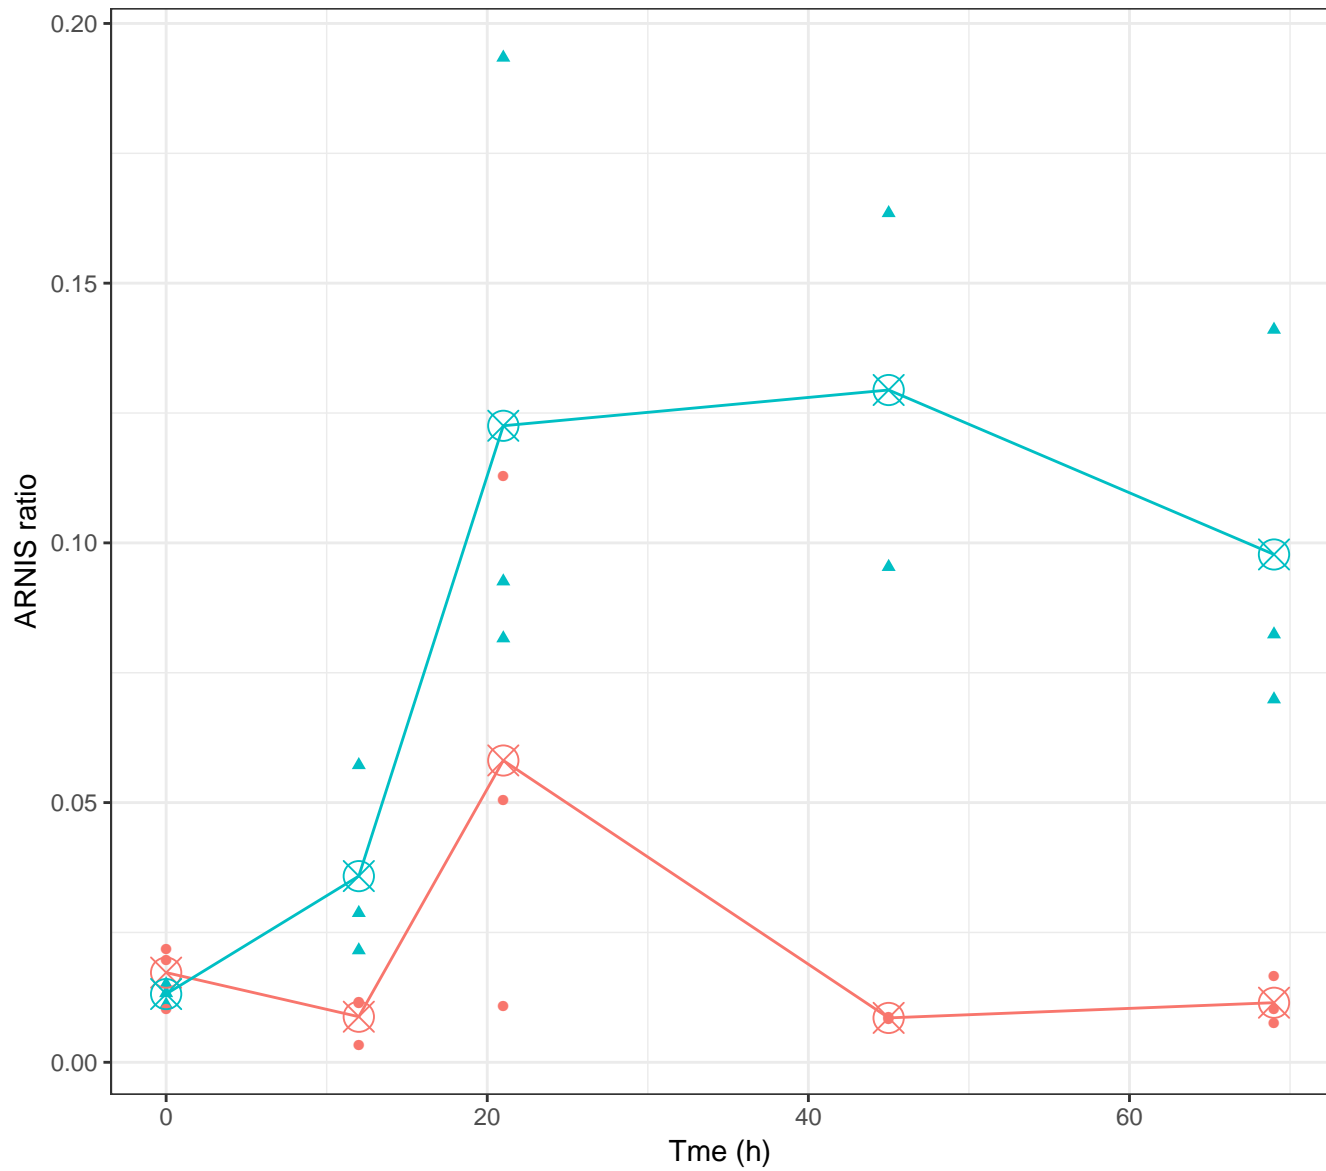

# OTU.178\_Actinobacteria\_Propionibacterium

Treatment Control Filtered-1micron

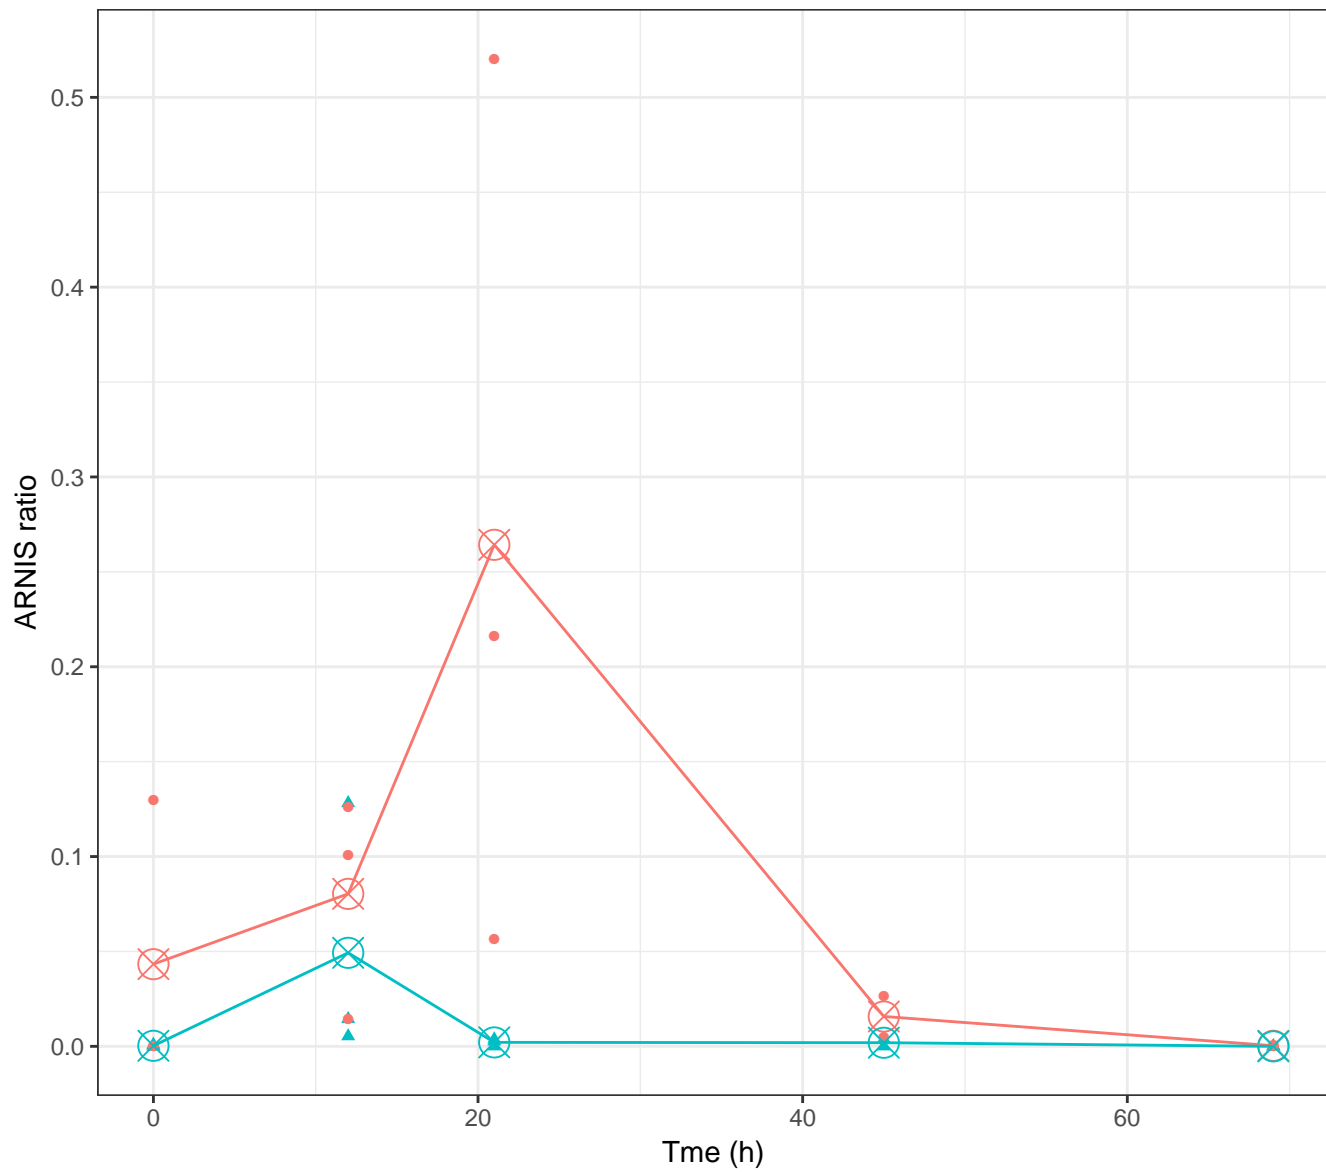



## OTU.11\_Bacteroidetes\_Pseudarcicella

Treatment Control Filtered-1micron

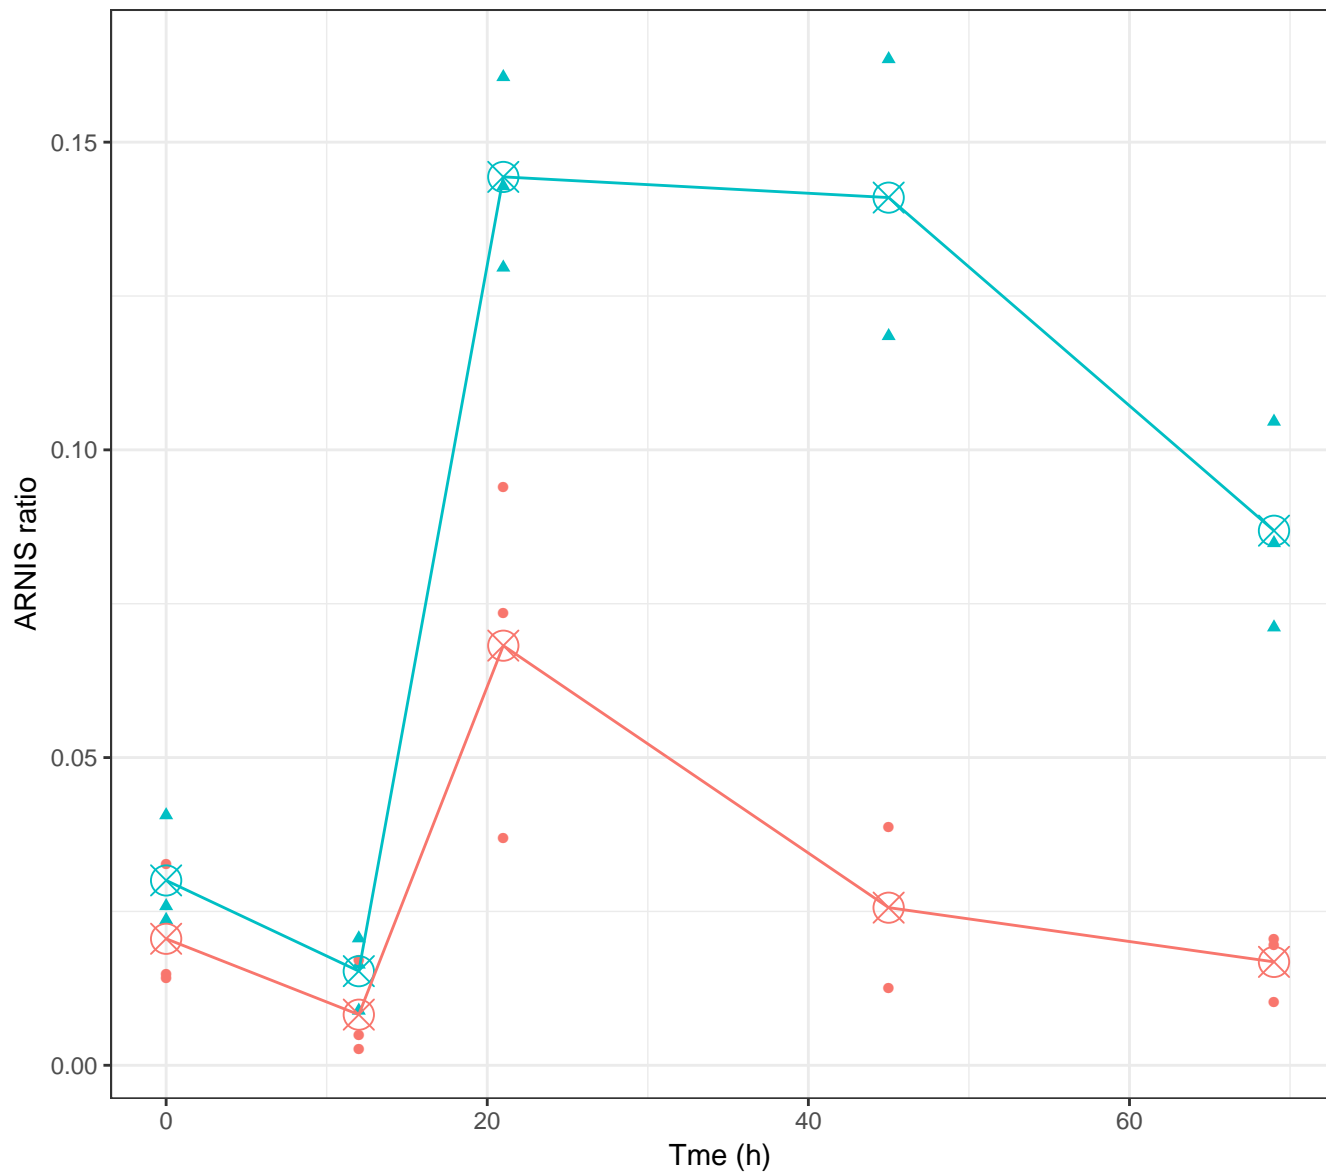

## OTU.176\_Bacteroidetes\_Saprospiracea

Treatment Control Filtered-1micron

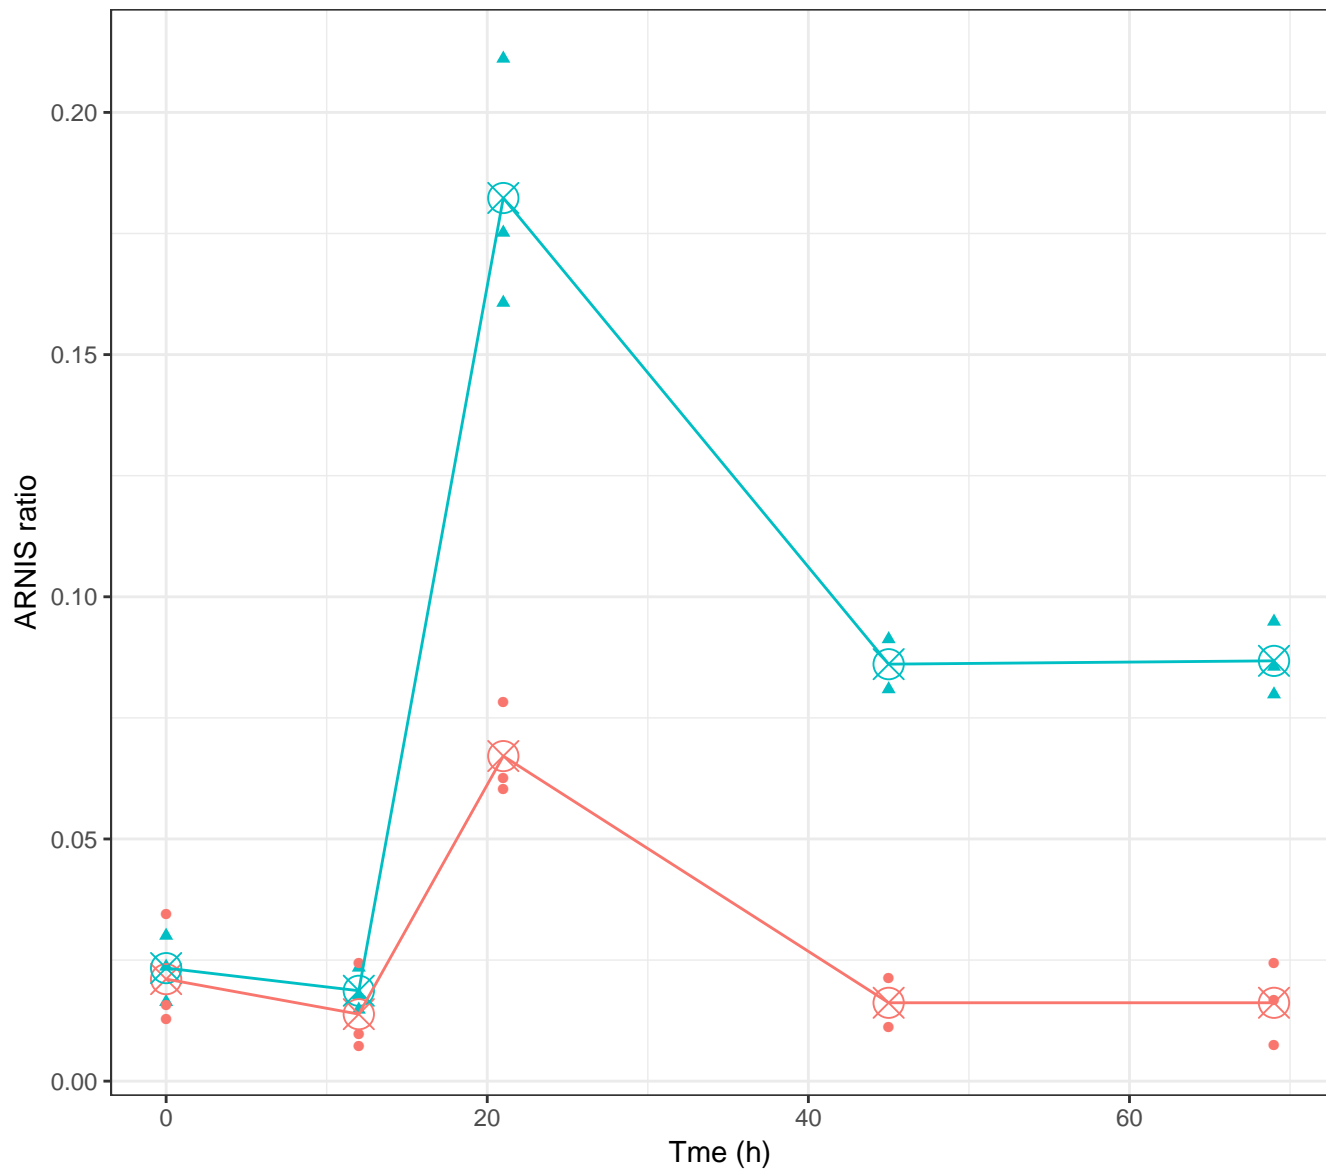

# OTU.180\_Bacteroidetes\_Flavobacterium

Treatment ⊗ Control ⊗ Filtered-1micron

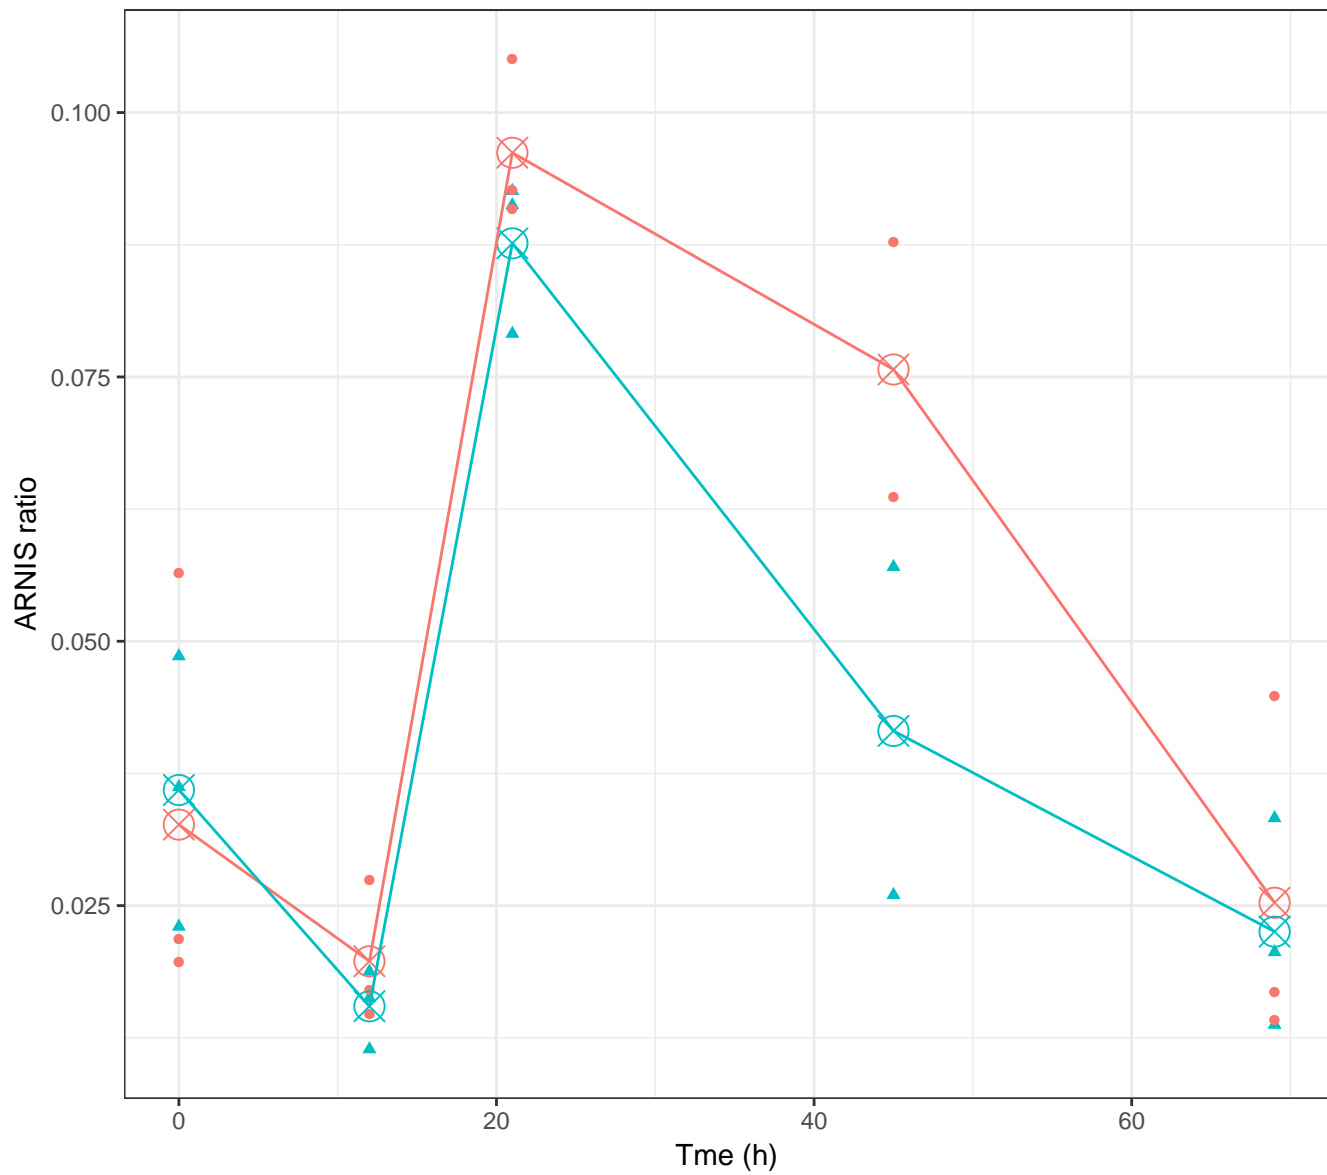

# OTU.179\_Bacteroidetes\_Cytophagaceae

Treatment Control Filtered-1micron

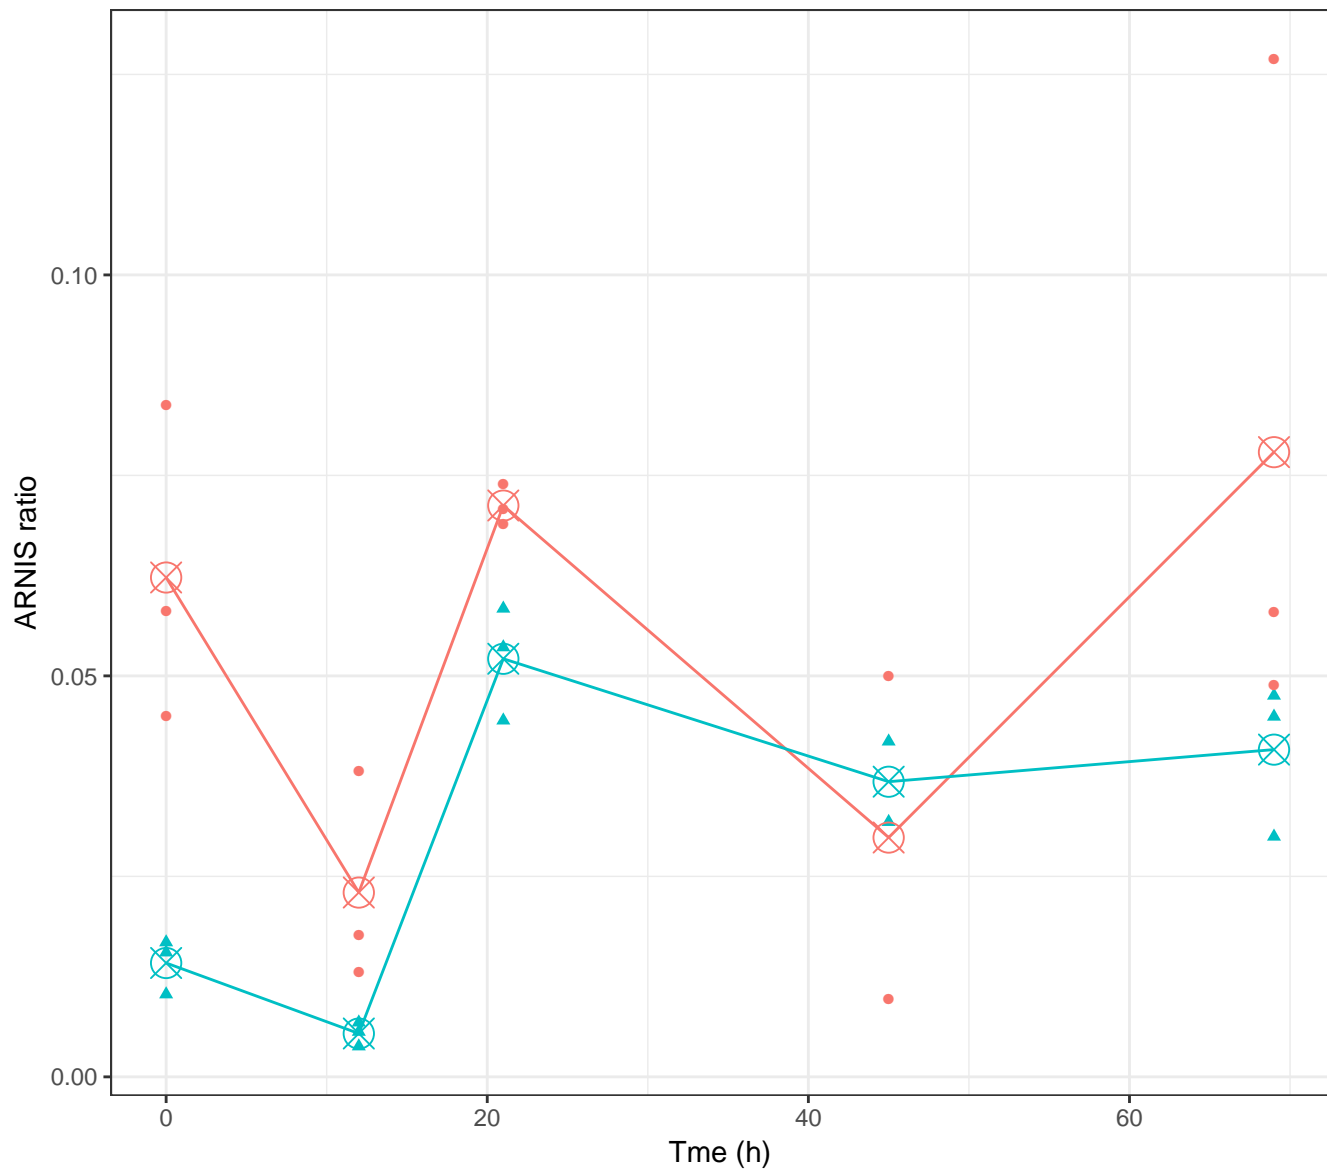

Treatment  Control  Filtered-1micron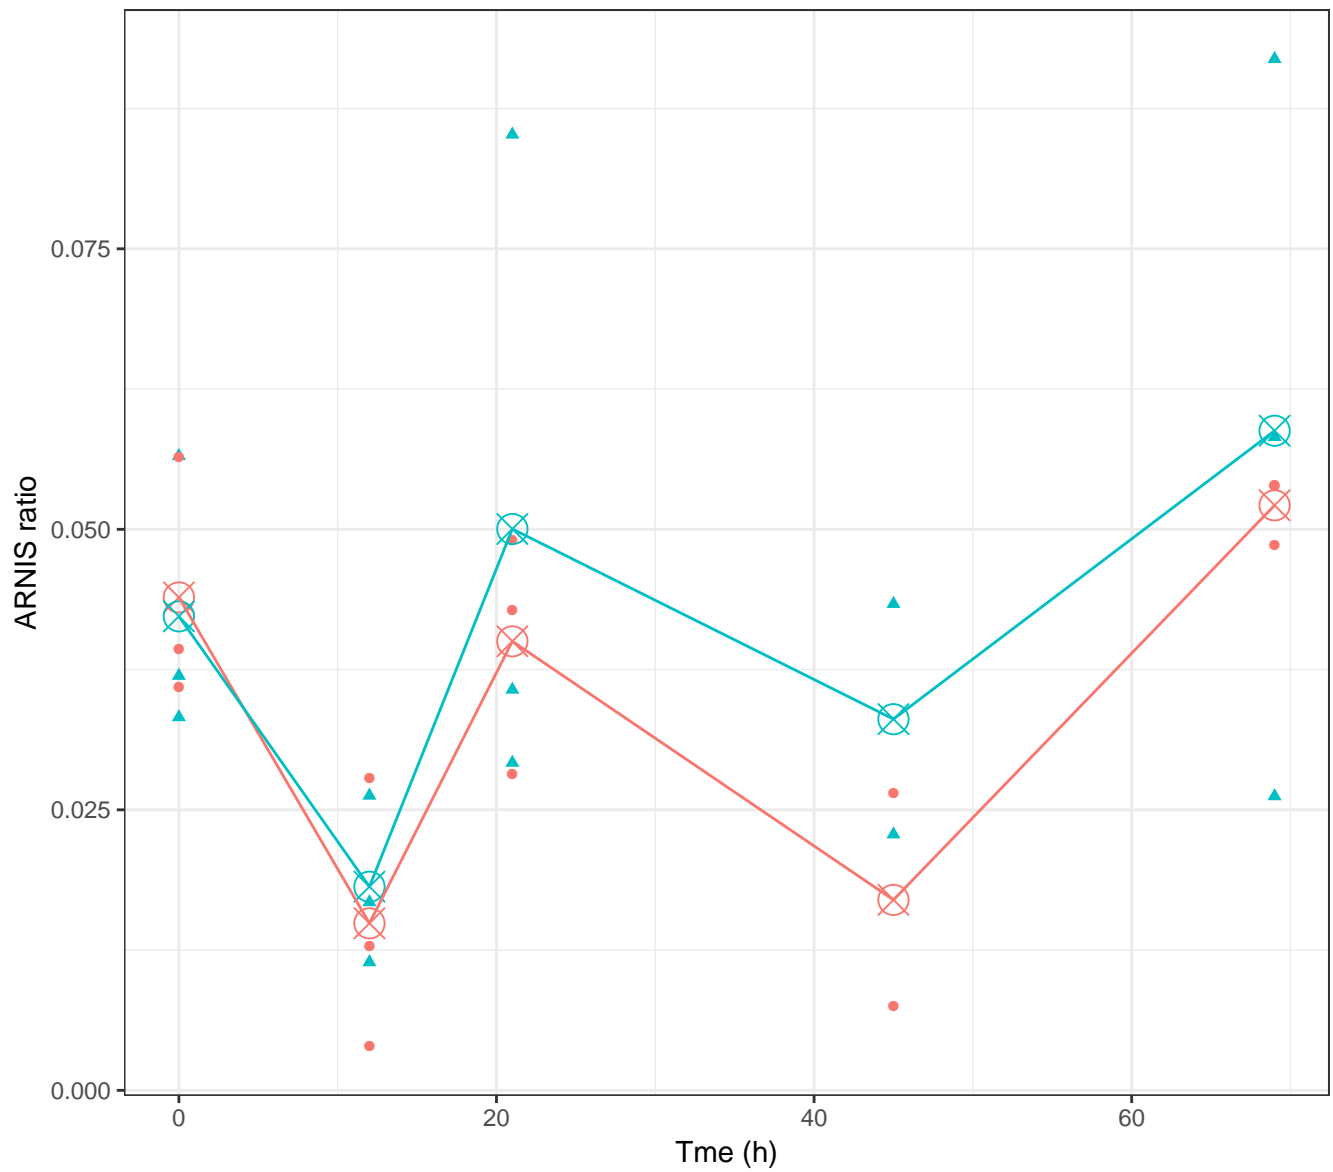

OTU.6322\_Actinobacteria\_CL500.29\_marine\_group.freshwater\_acIV.C\_clade

Treatment Control Filtered-1micron

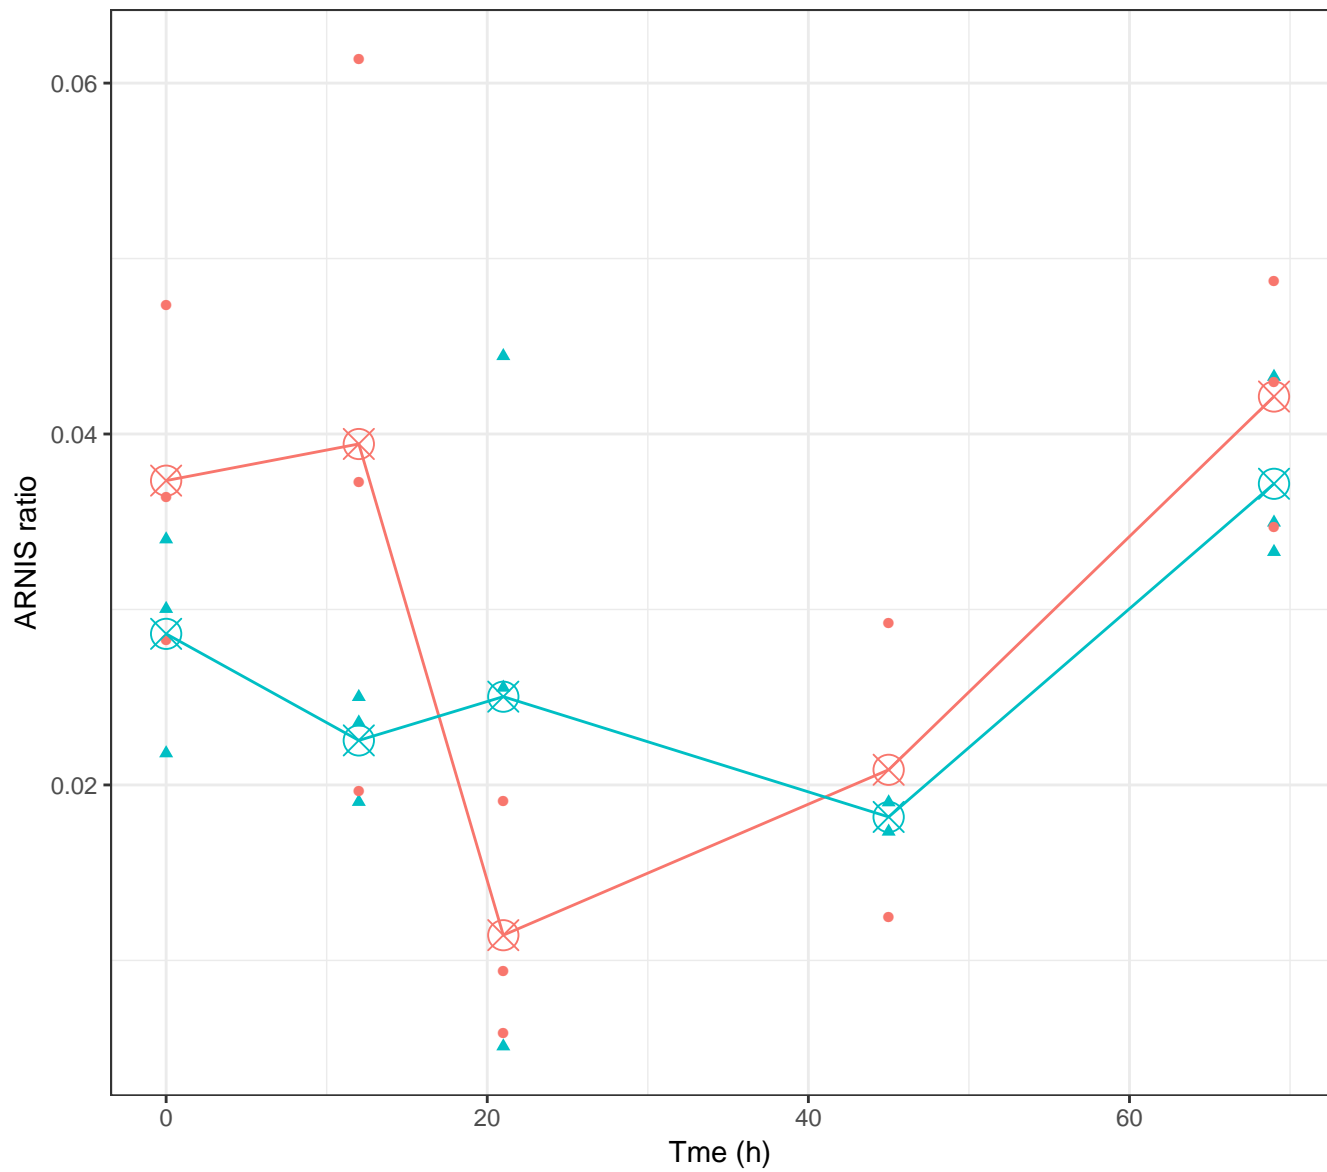

# OTU.284\_Alphaproteobacteria\_Roseomonas

Treatment Control Filtered-1micron

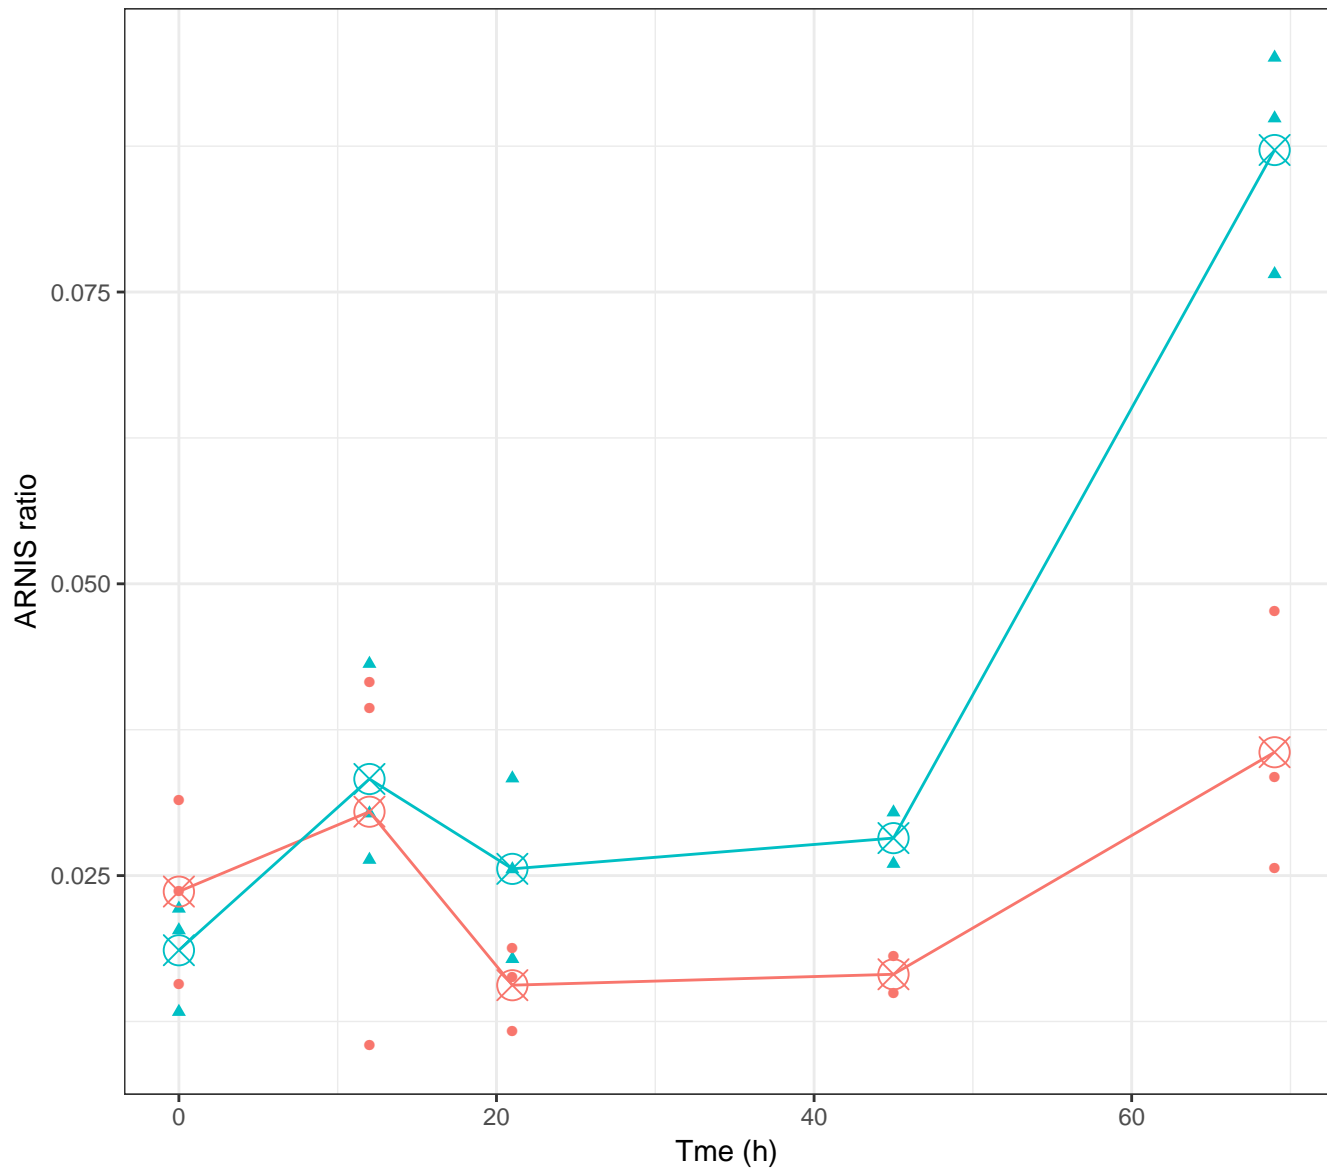

# OTU.191\_TM6

Treatment  Control  Filtered-1micron

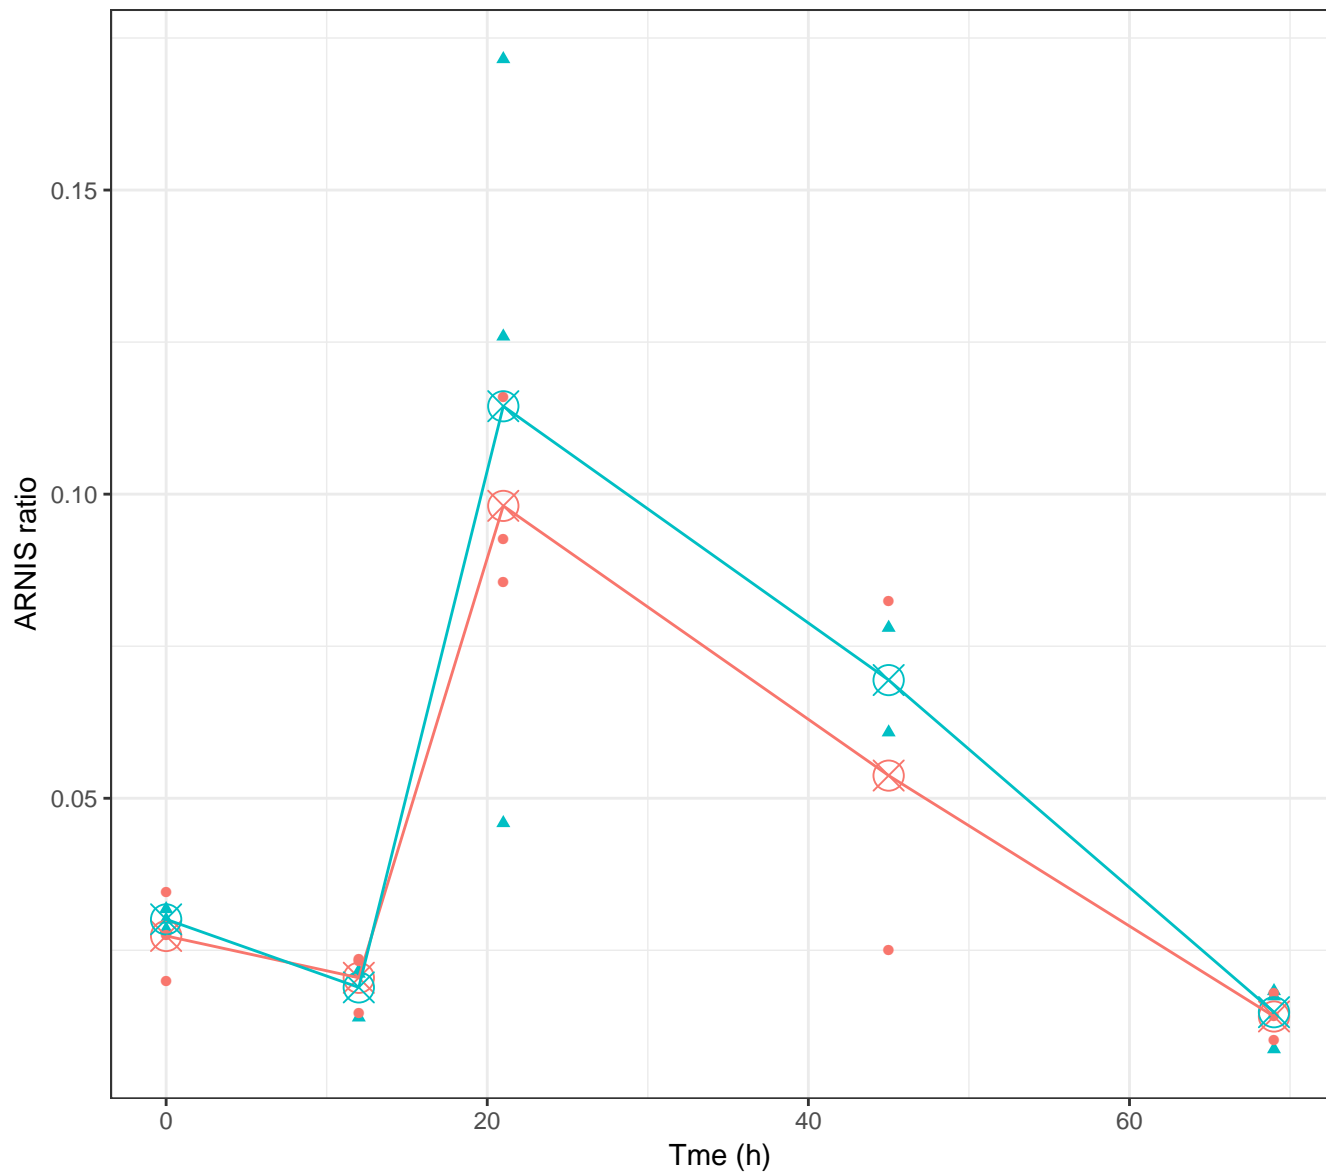



# OTU.733\_Verrucomicrobia\_Prostheco bacter

Treatment ⊗ Control ⊗ Filtered-1micron

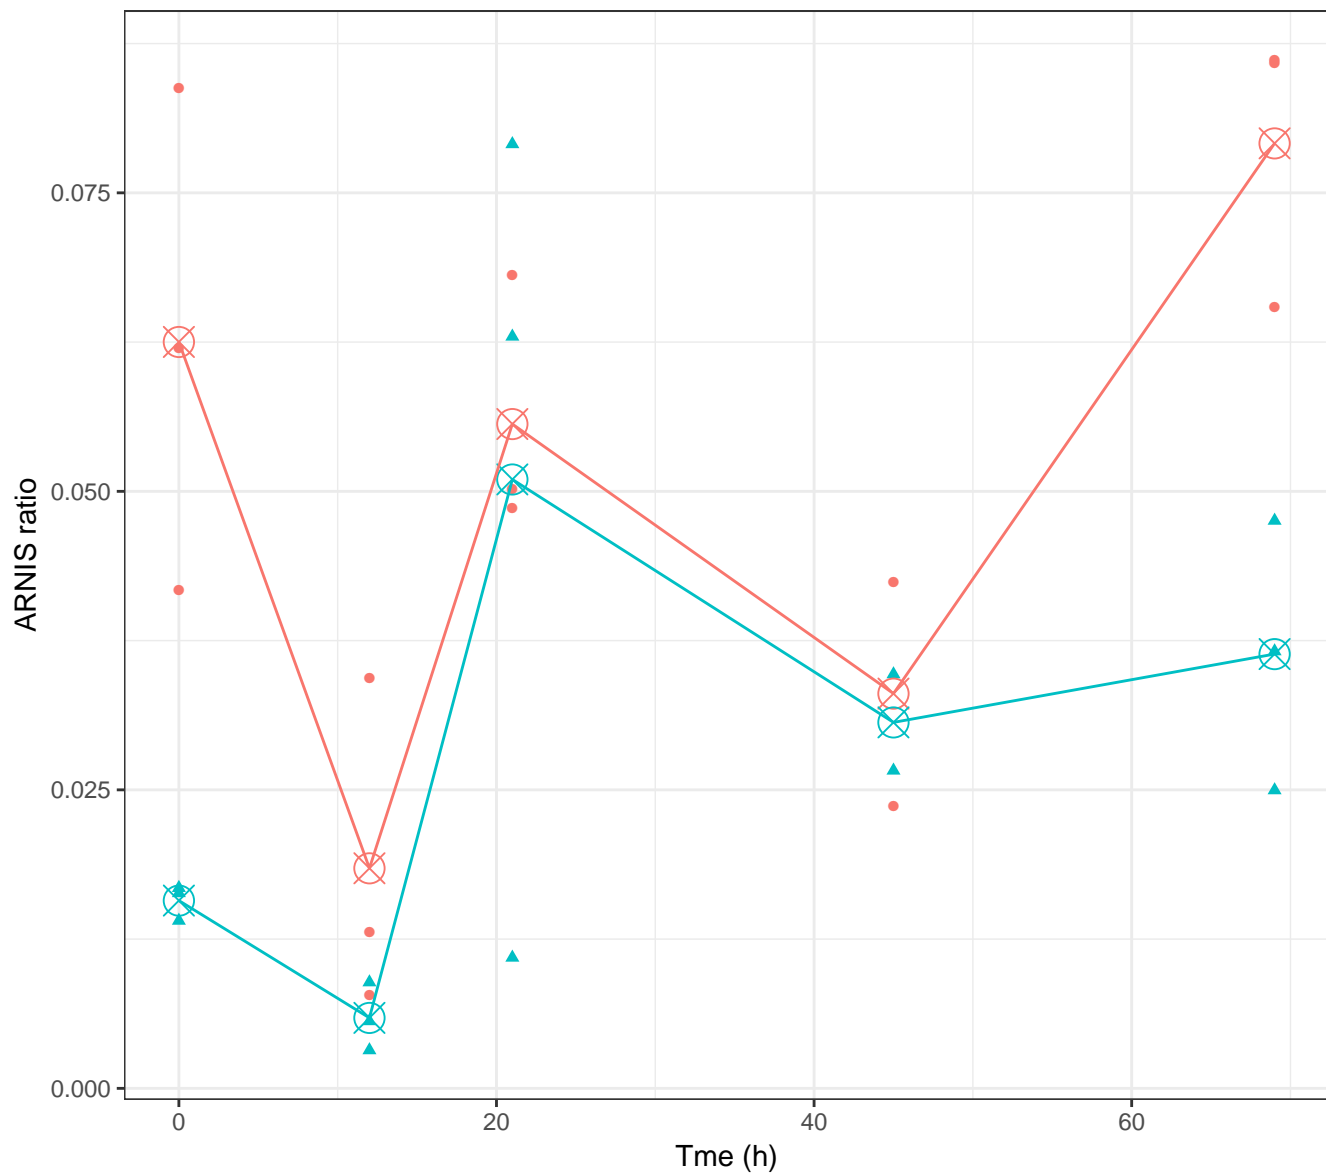

# OTU.184\_Bacteroidetes\_NS11.12\_marine\_group

Treatment ⊗ Control ⊗ Filtered-1micron

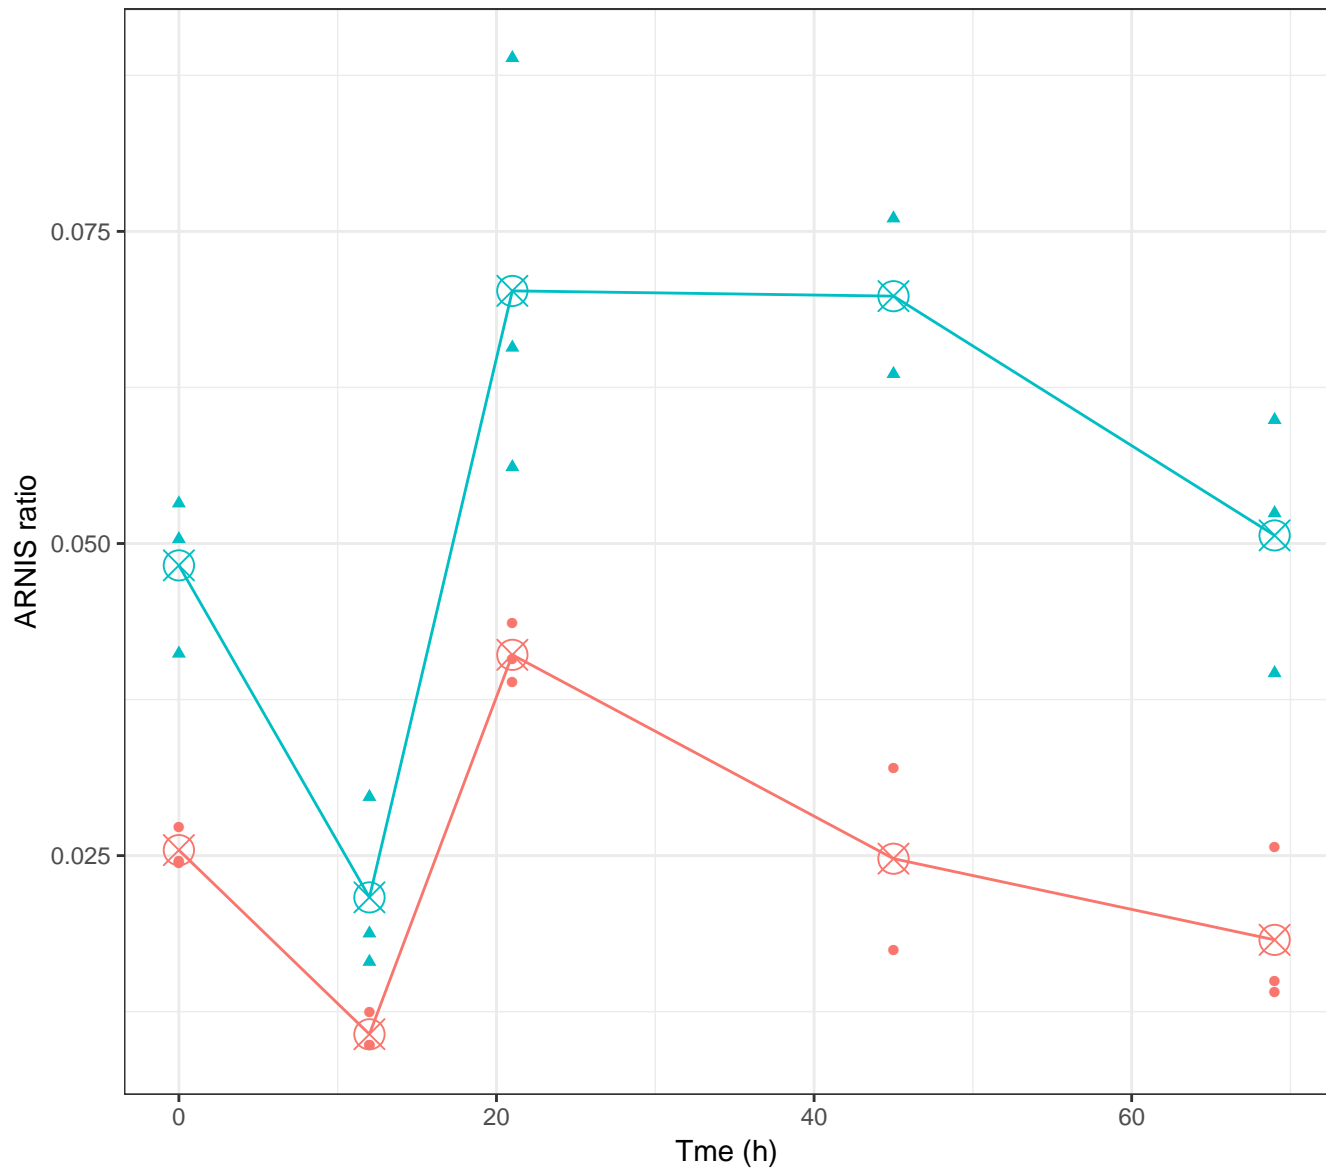

# OTU.248\_Alphaproteobacteria\_Rhodobaca

Treatment Control Filtered-1micron

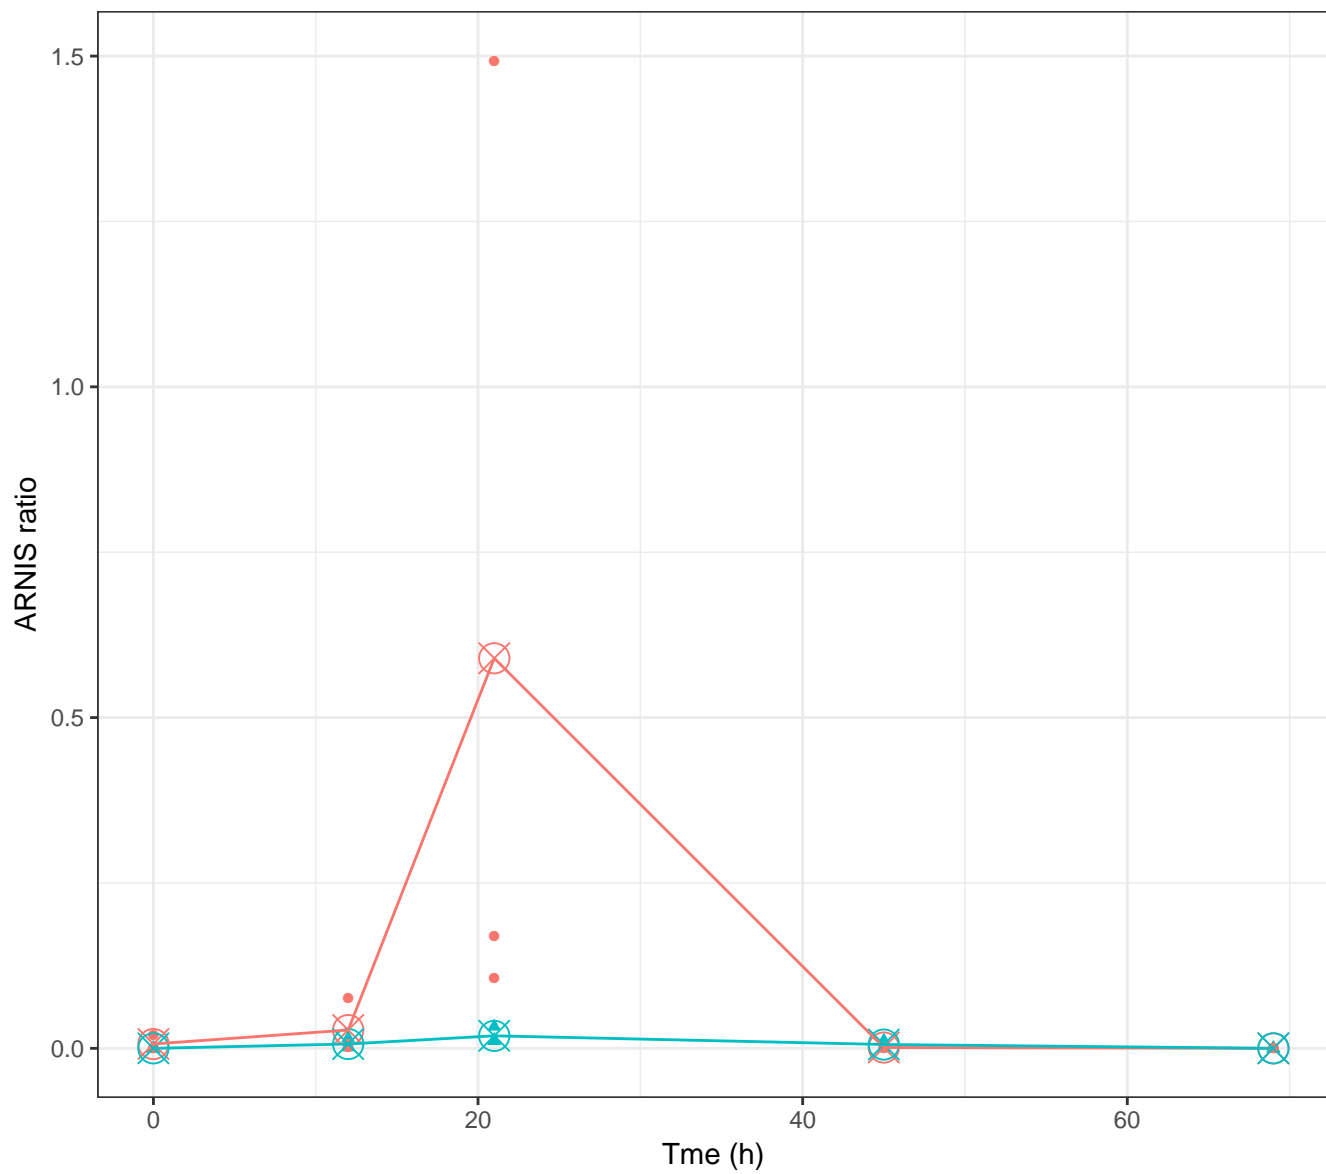

# OTU.197\_Bacteroidetes\_Emticia

Treatment  Control  Filtered-1micron

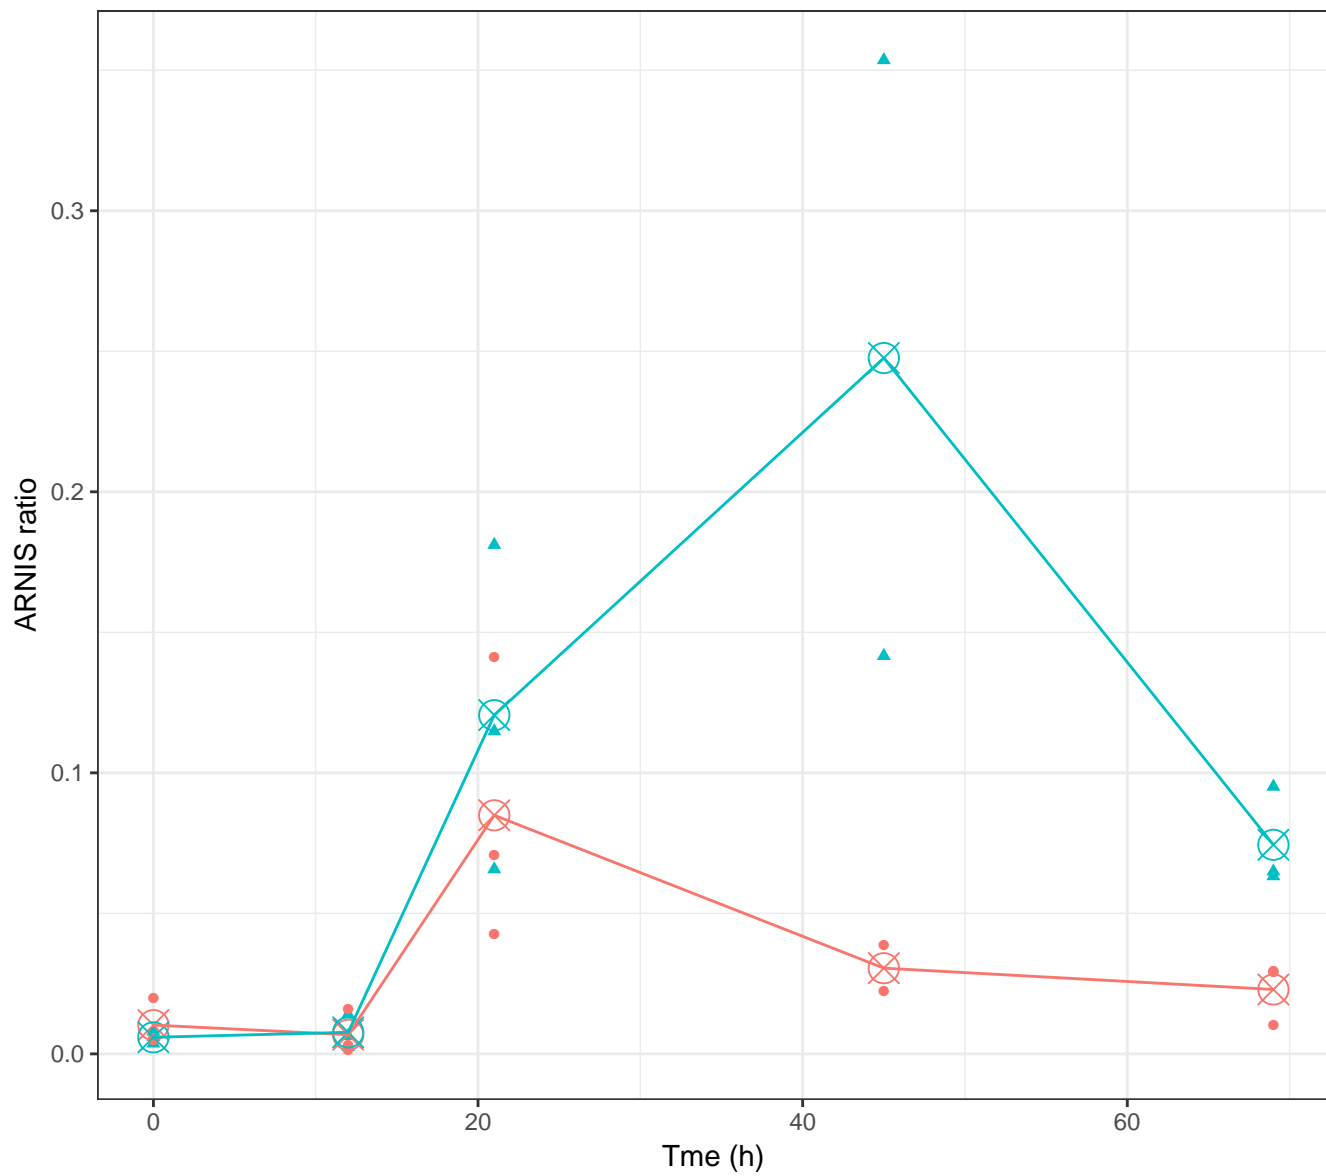

# OTU.194\_Chlorobi\_OPB56

Treatment ⊗ Control ▲ Filtered-1micron

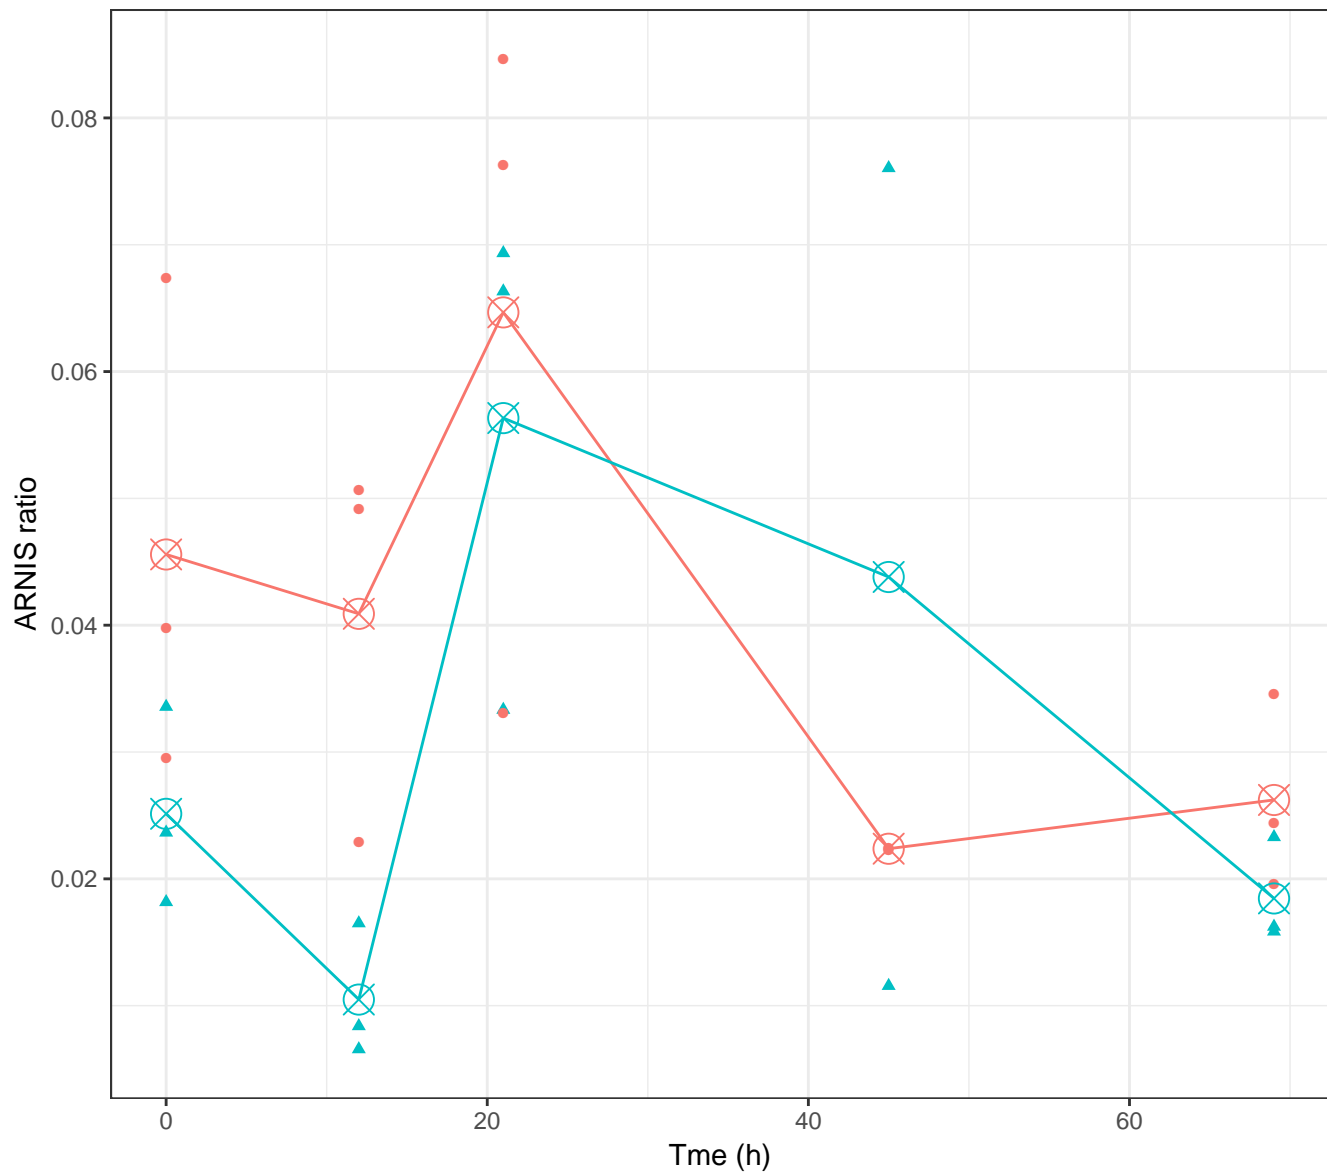

# OTU.1749\_Verrucomicrobia\_OPB35\_soil\_group

Treatment ⊗ Control ⊗ Filtered-1micron

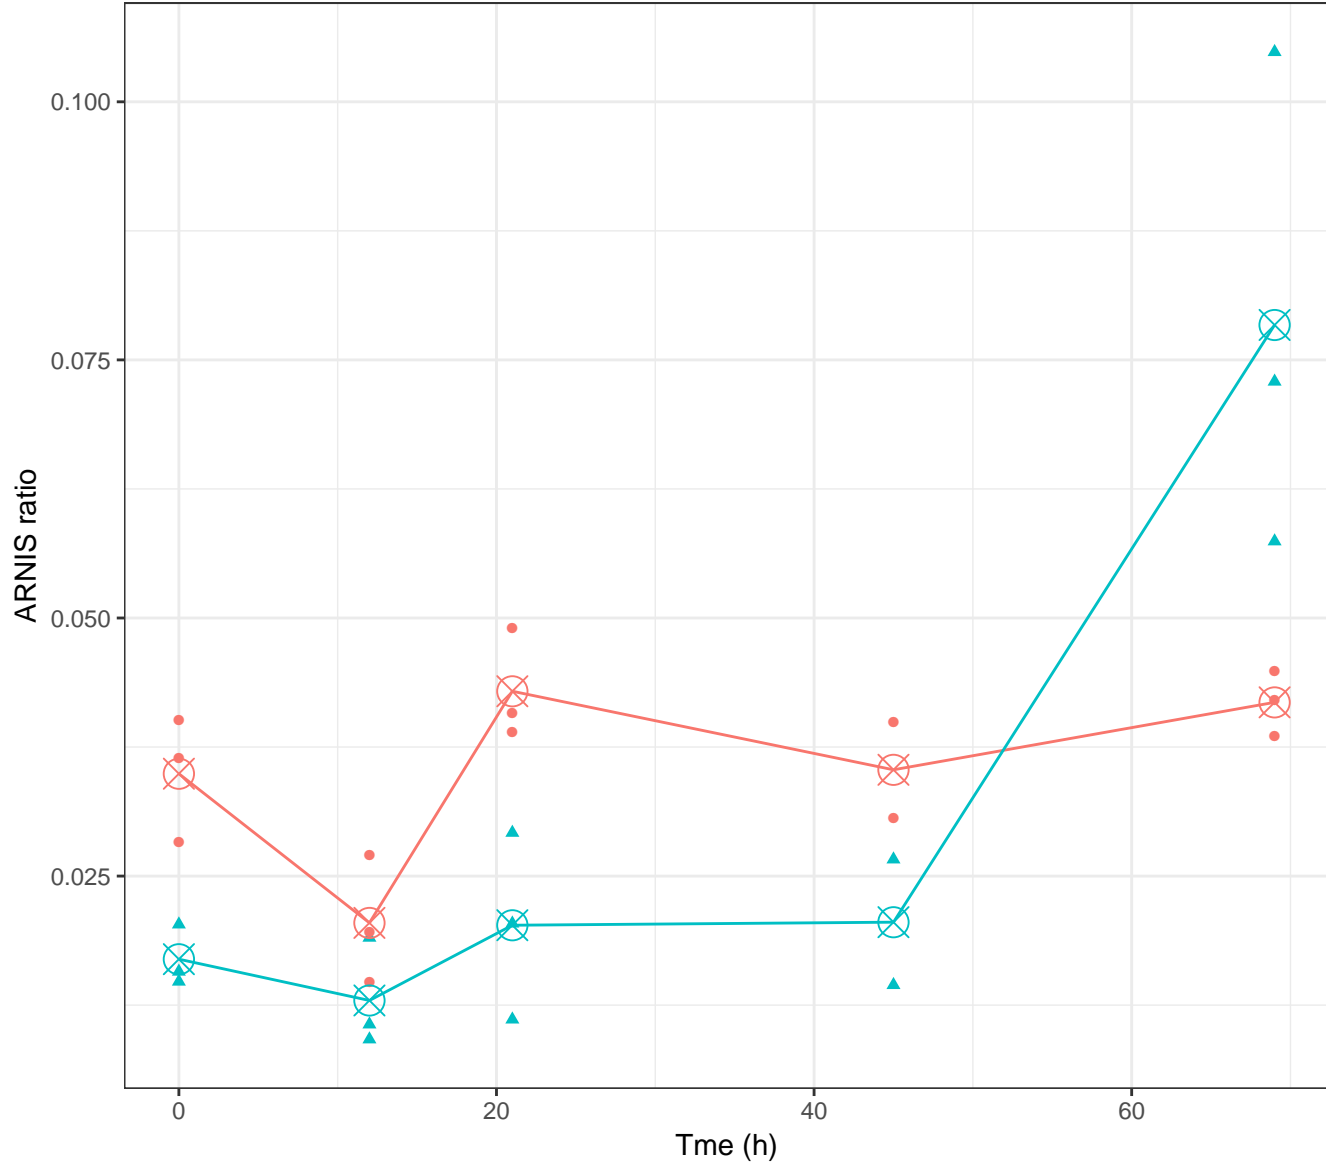

# OTU.19\_Actinobacteria\_clade\_acl.B2.4

Treatment ⊗ Control ⊗ Filtered-1micron

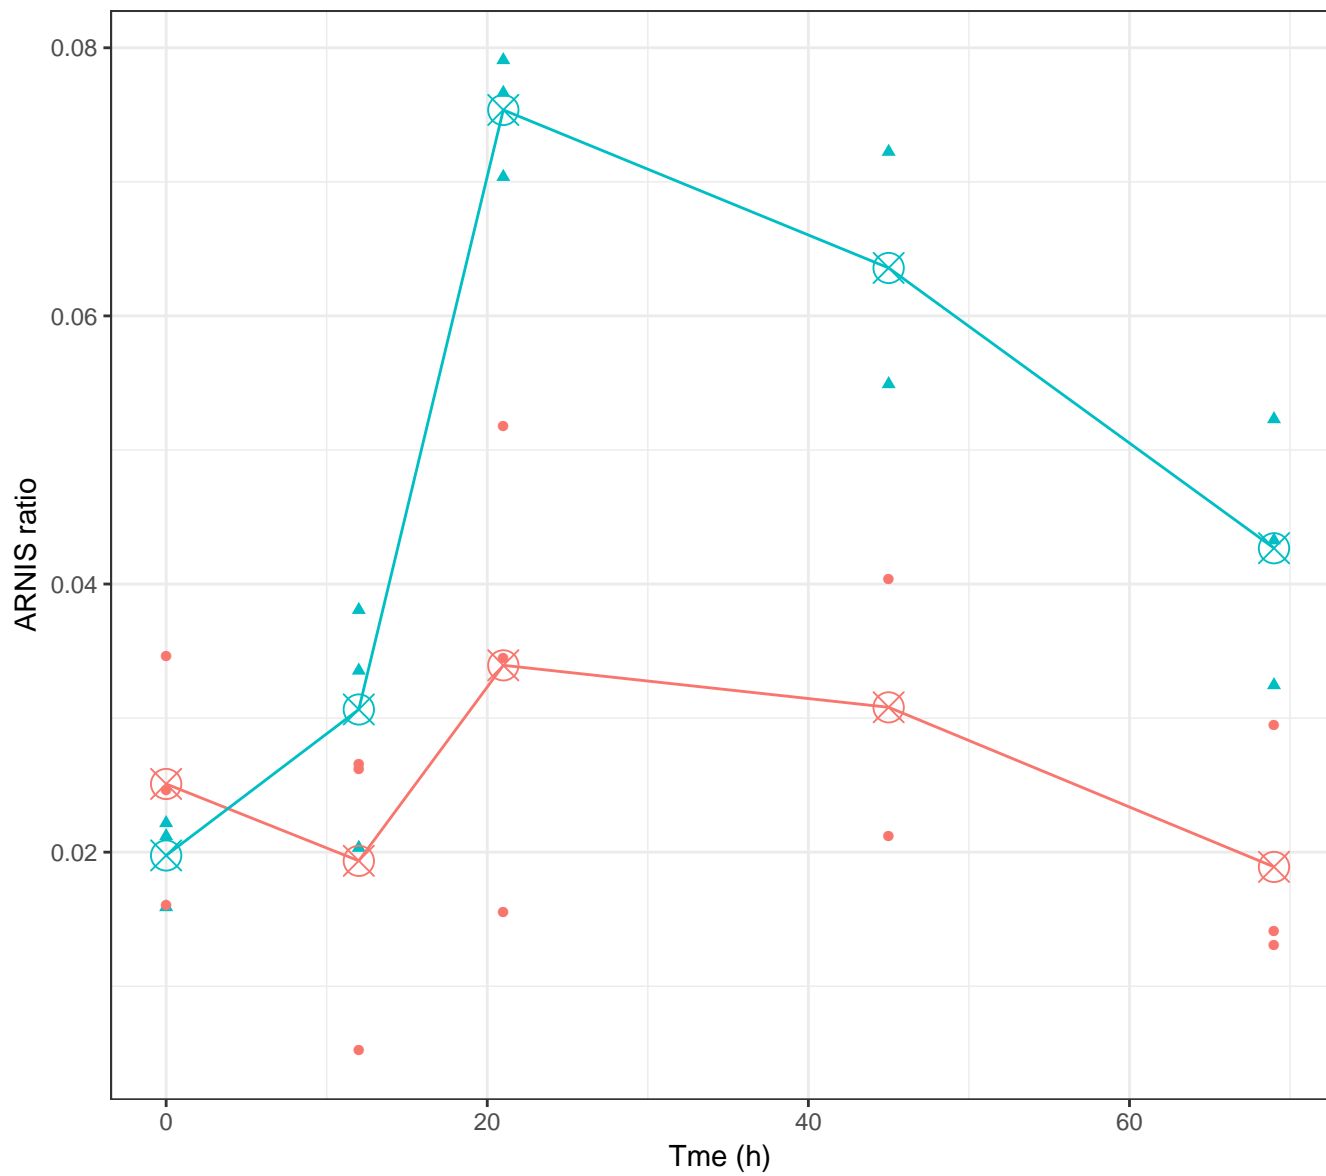

# OTU.50\_Alphaproteobacteria\_Sphingopyxis

Treatment Control Filtered-1micron

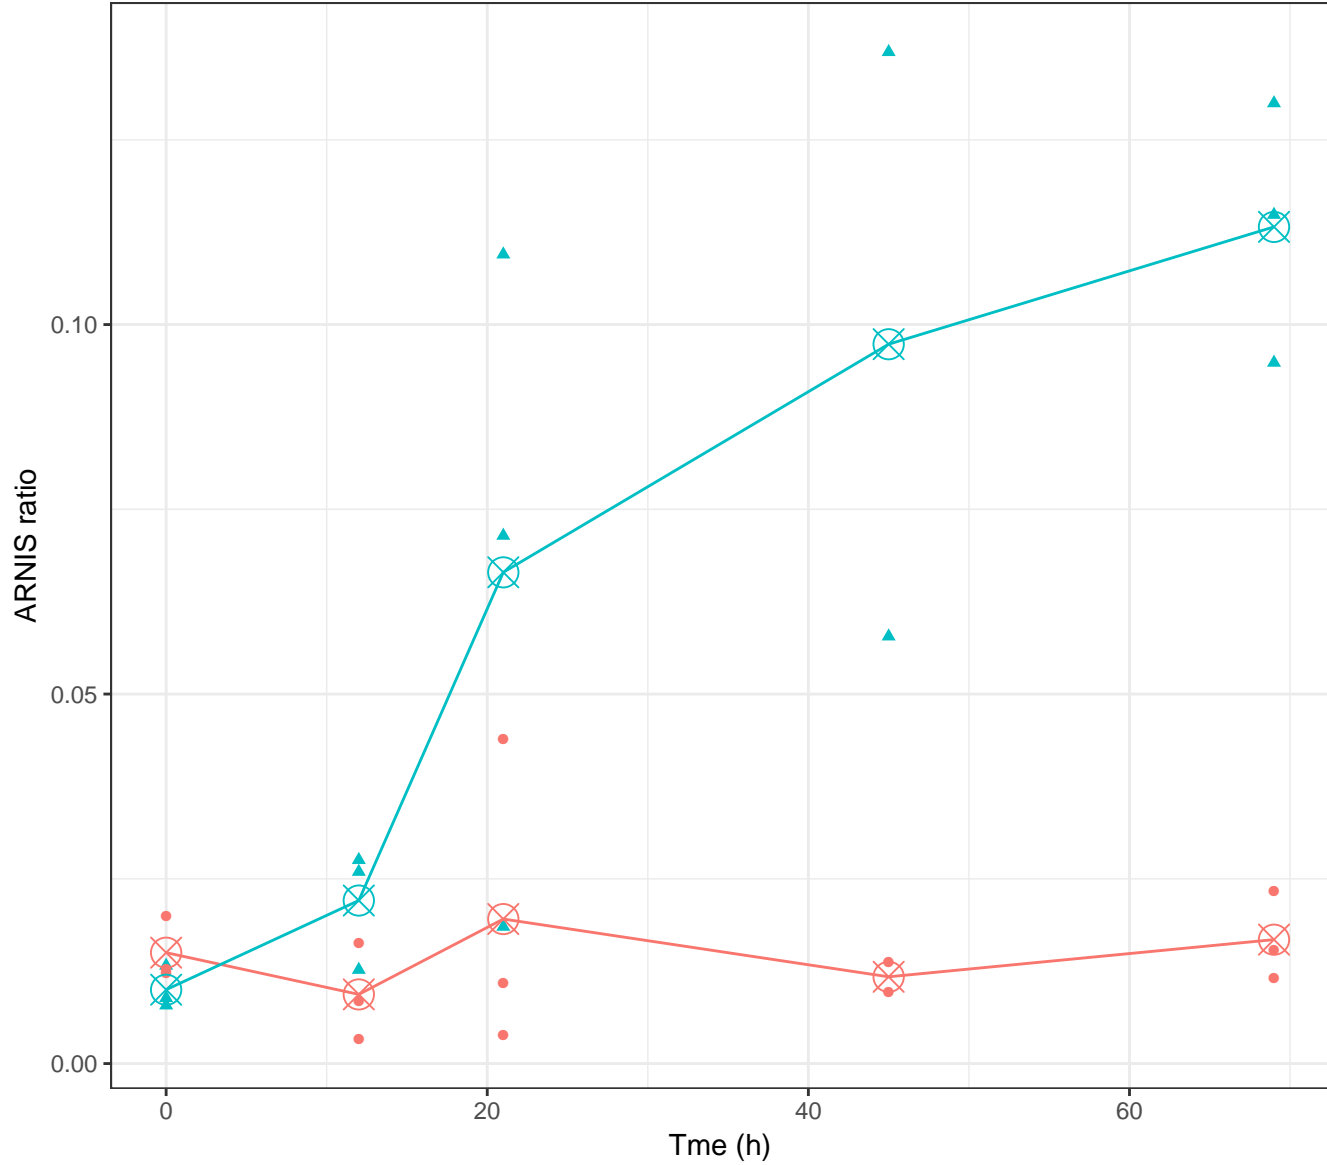



# OTU.245\_Gammaproteobacteria\_Pseudospirillum

Treatment ⊗ Control ⊗ Filtered-1micron

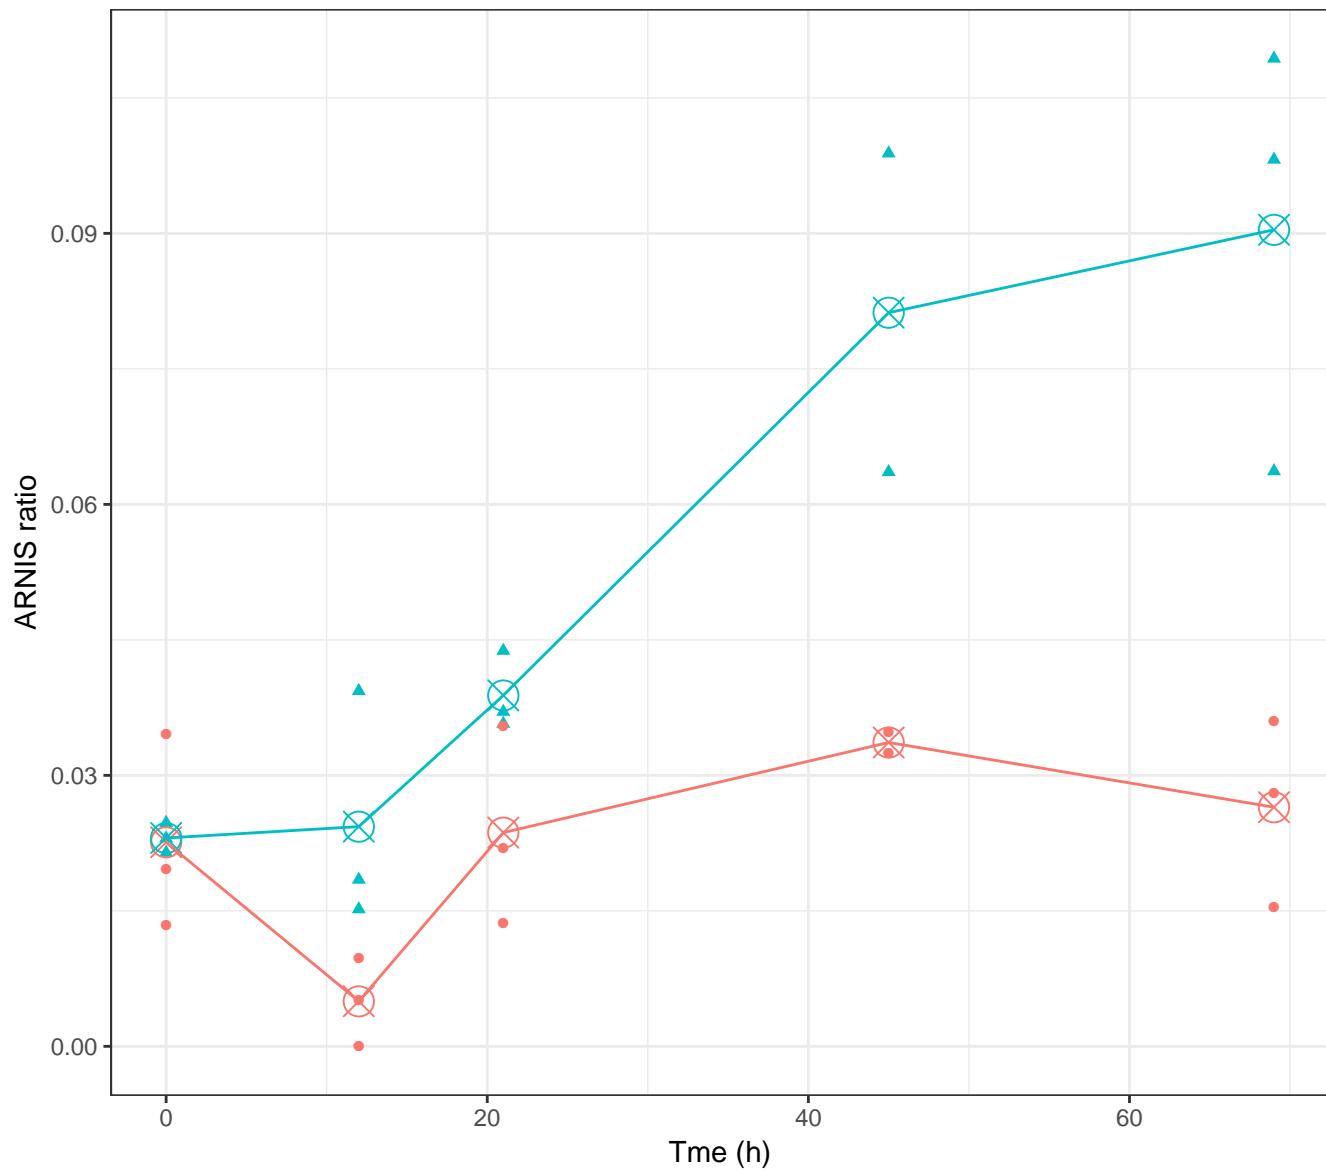

# OTU.209\_Bacteroidetes\_NS11.12\_marine\_group

Treatment ⊗ Control ⊗ Filtered-1micron

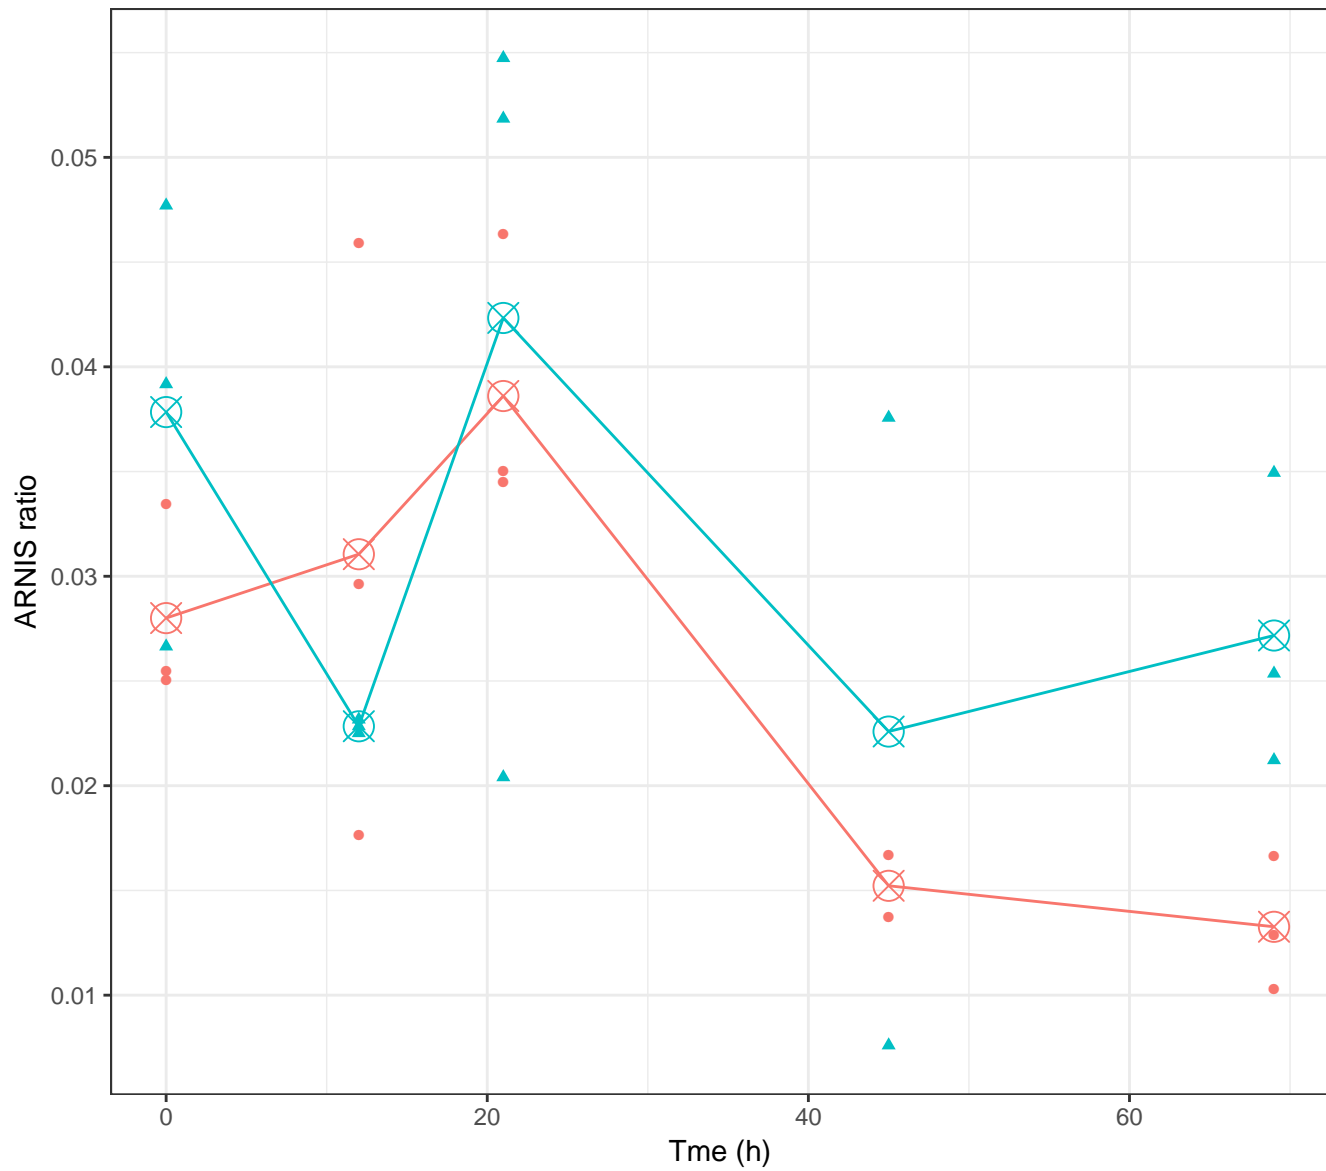

# OTU.230\_Verrucomicrobia\_Brevifollis

Treatment ⊗ Control ⊗ Filtered-1micron

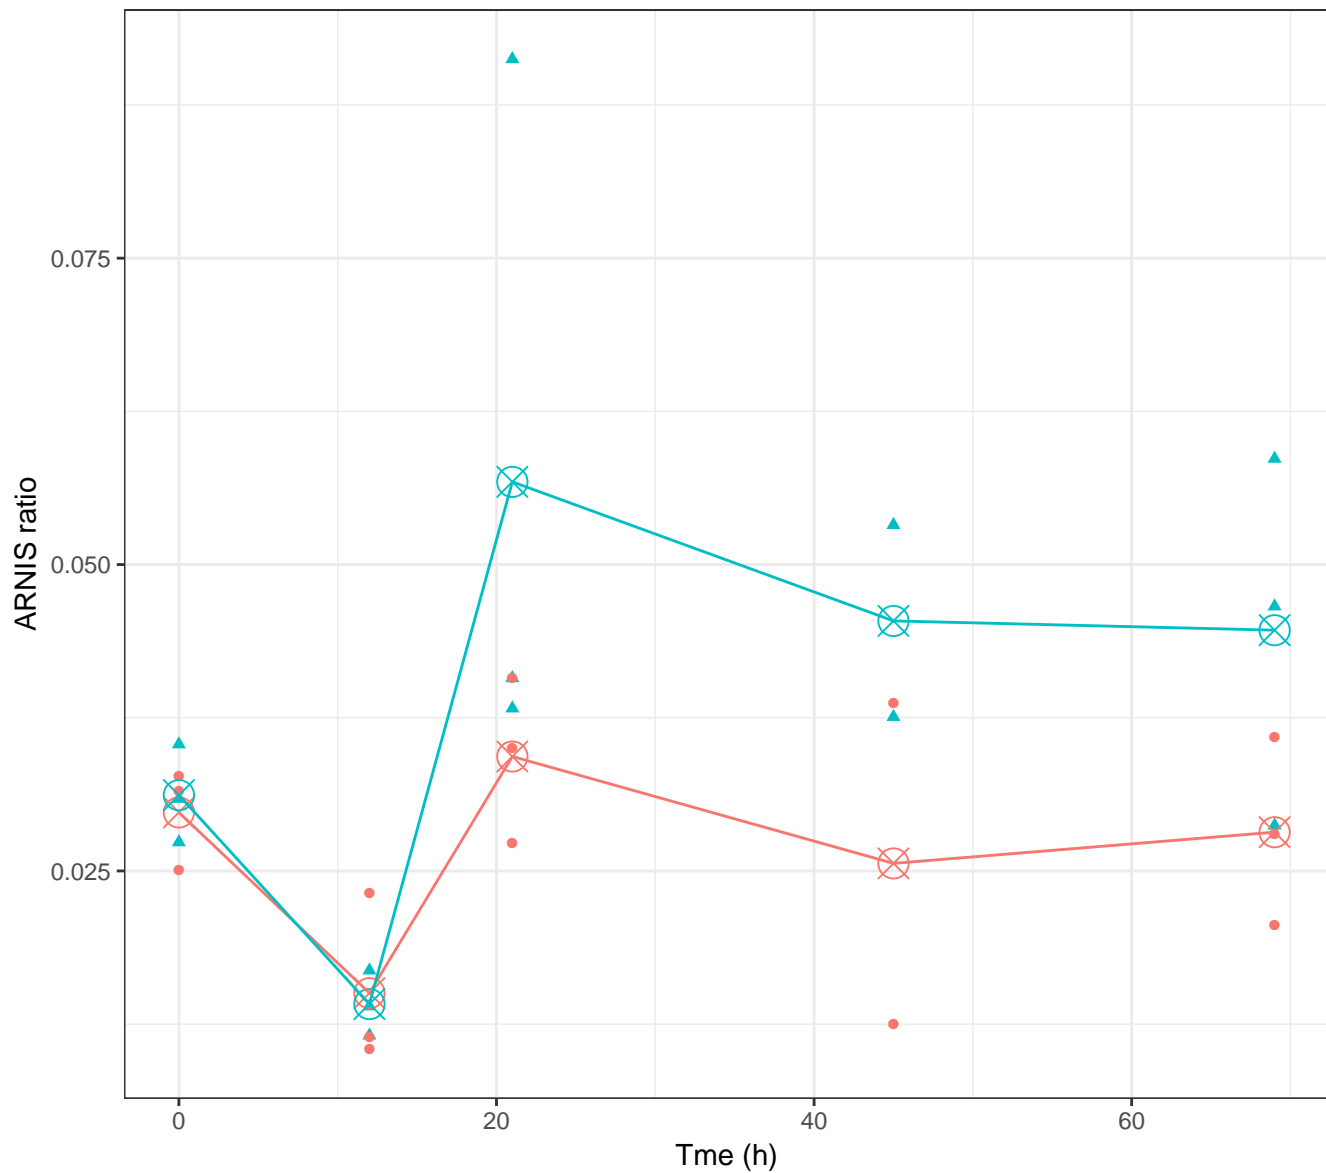

# OTU.195\_Alphaproteobacteria\_CandidatusCaptivus

Treatment Control Filtered-1micron

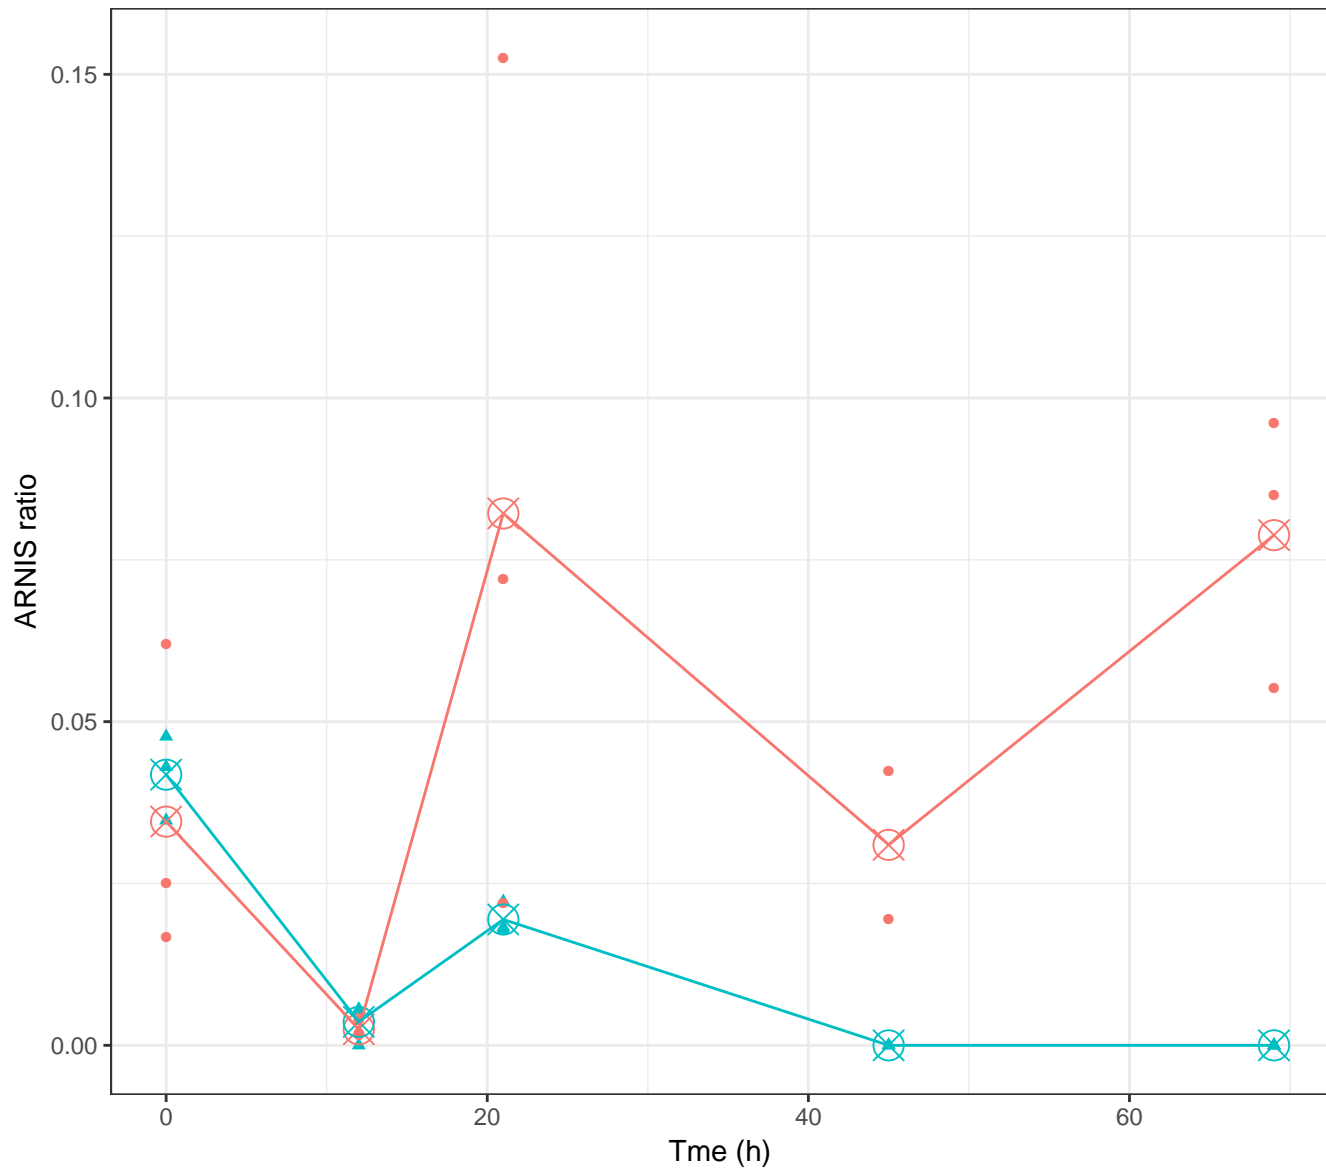

# OTU.210\_Bacteroidetes\_NS11.12\_marine\_group

Treatment Control Filtered-1micron

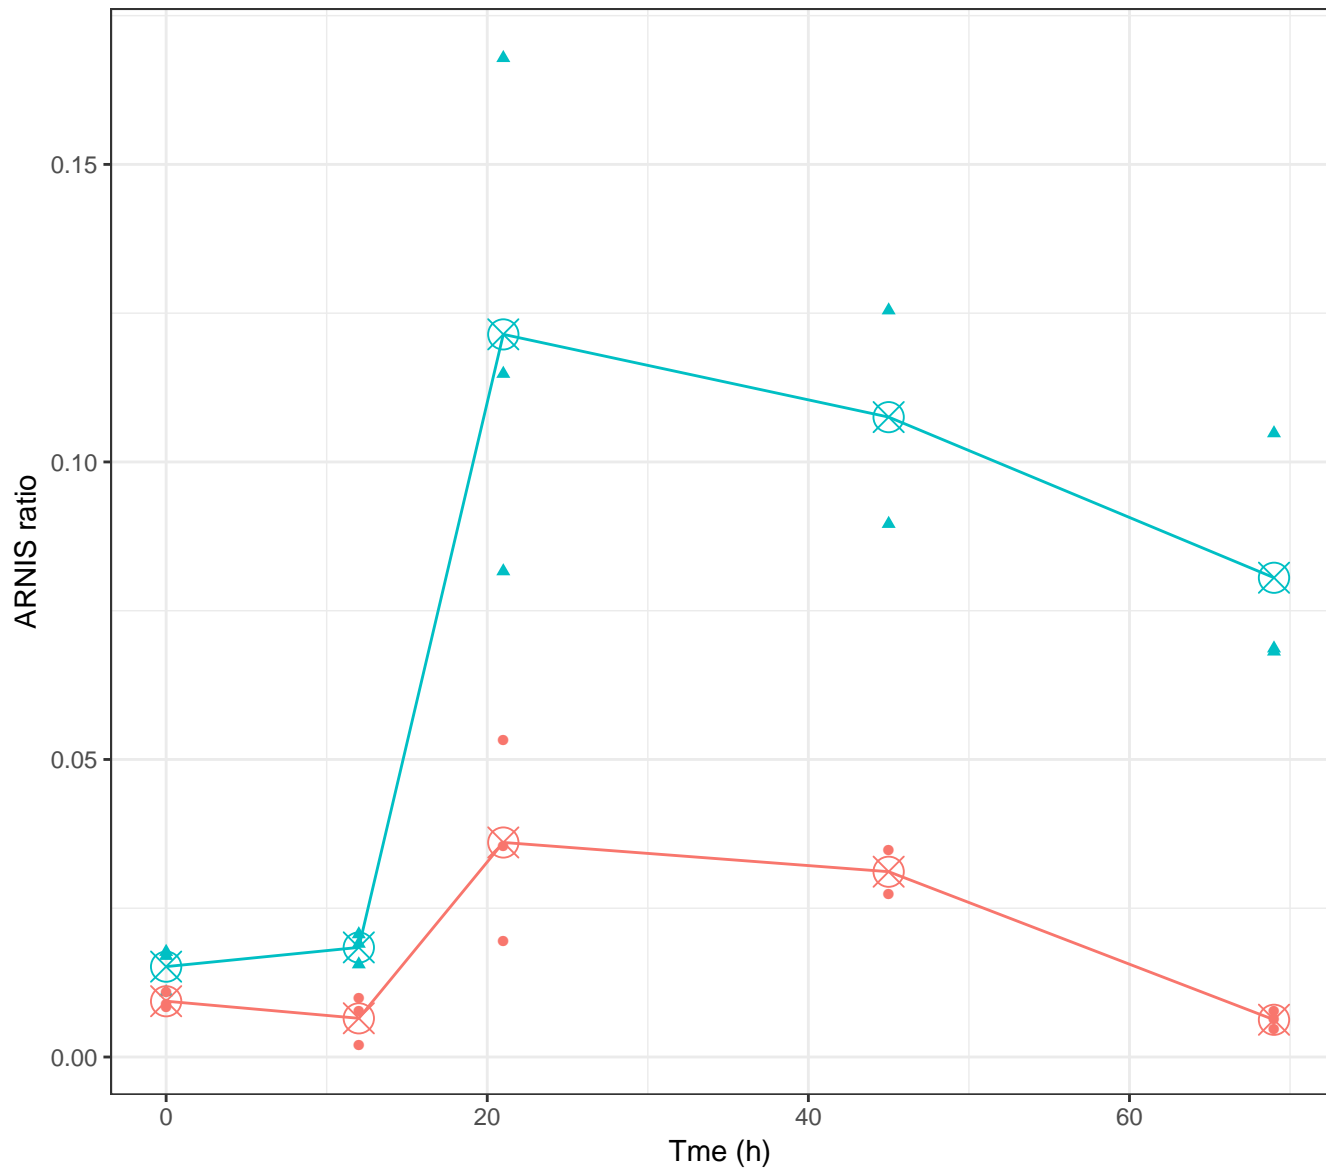

# OTU.213\_Alphaproteobacteria\_Brevundimonas

Treatment Control Filtered-1micron

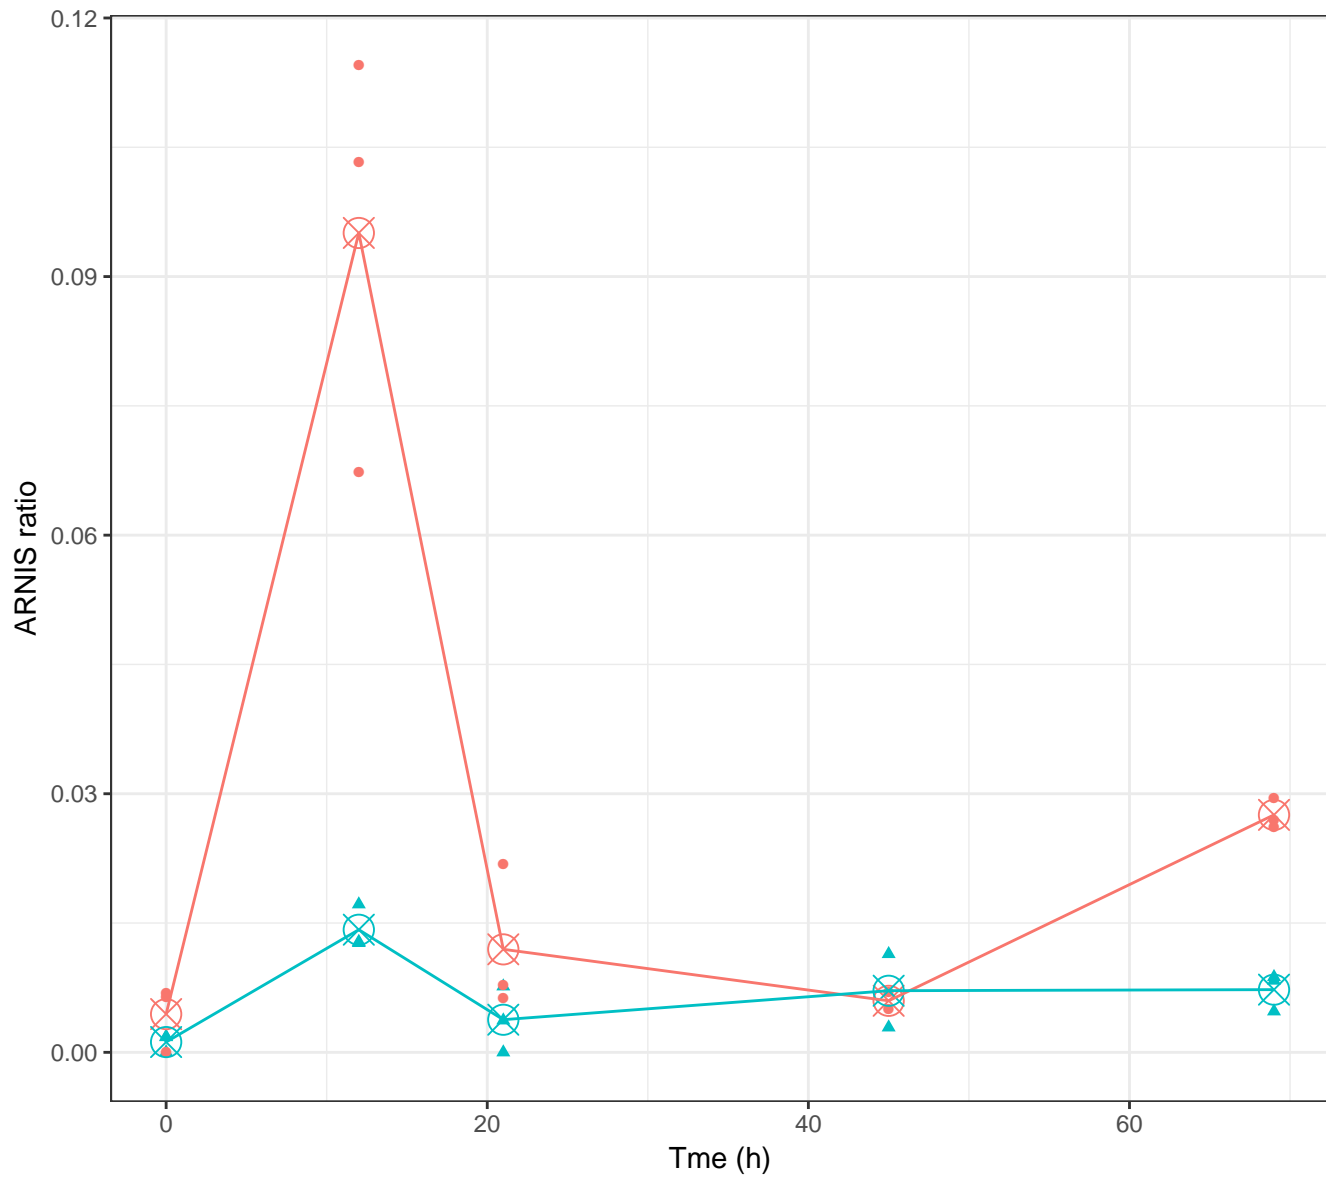

# OTU.21\_Betaproteobacteria\_Kerstesia

Treatment Control Filtered-1micron

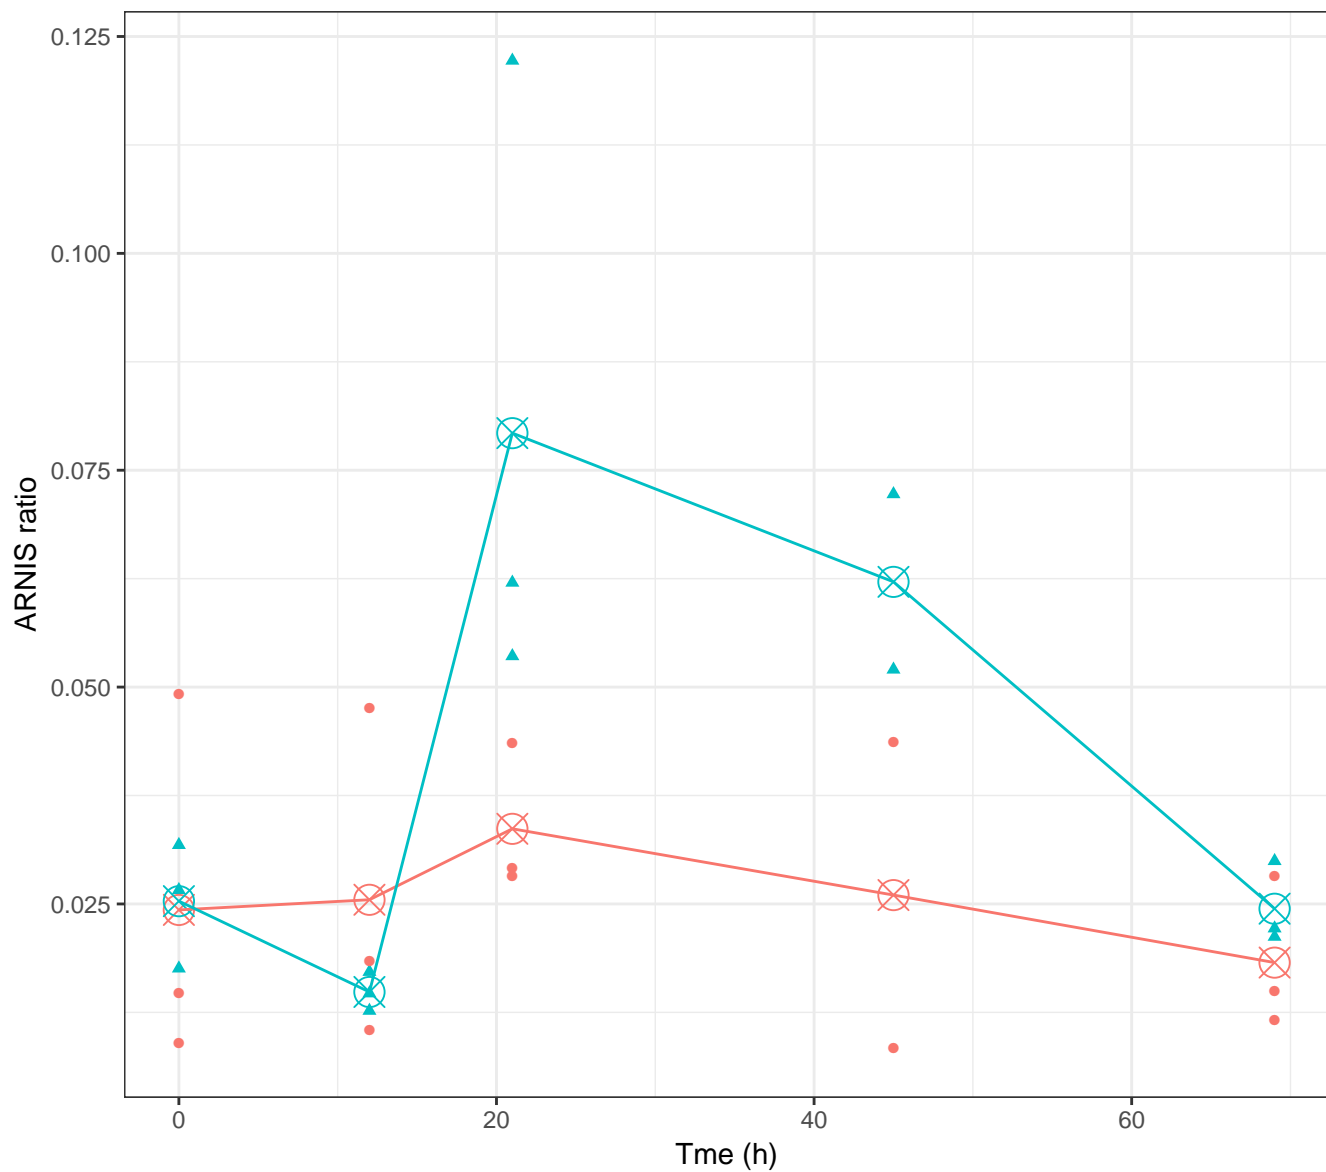

# OTU.233\_Bacteroidetes\_Flavobacterium

Treatment Control Filtered-1micron

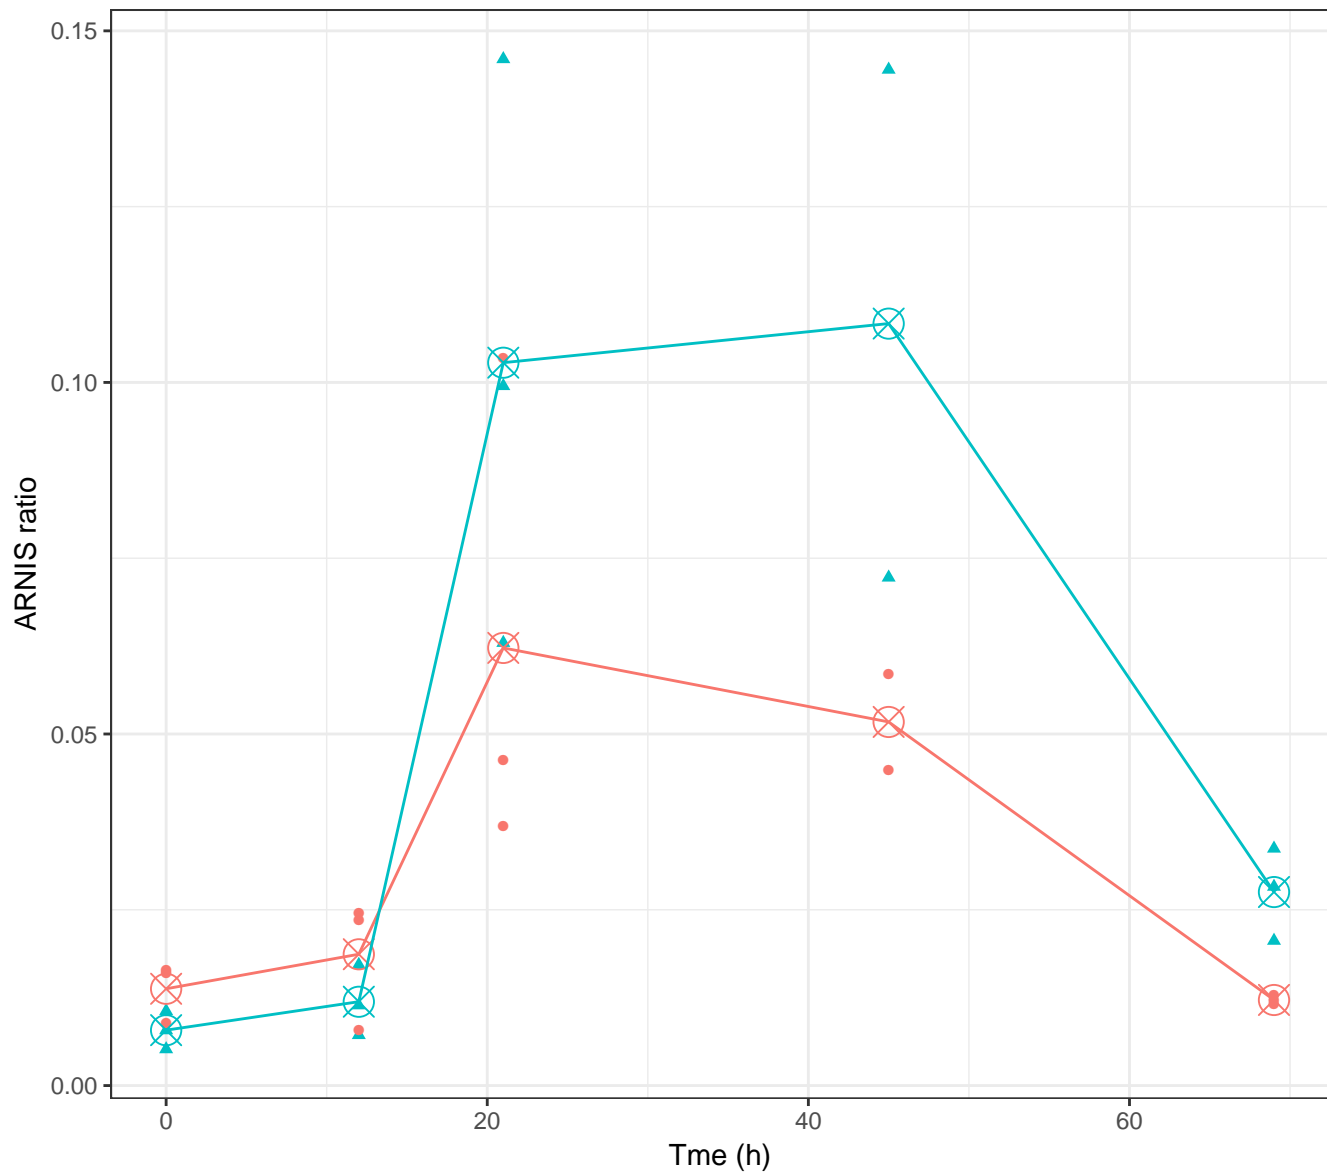



# OTU.313\_Alphaproteobacteria\_Phenylobacterium

Treatment Control Filtered-1micron

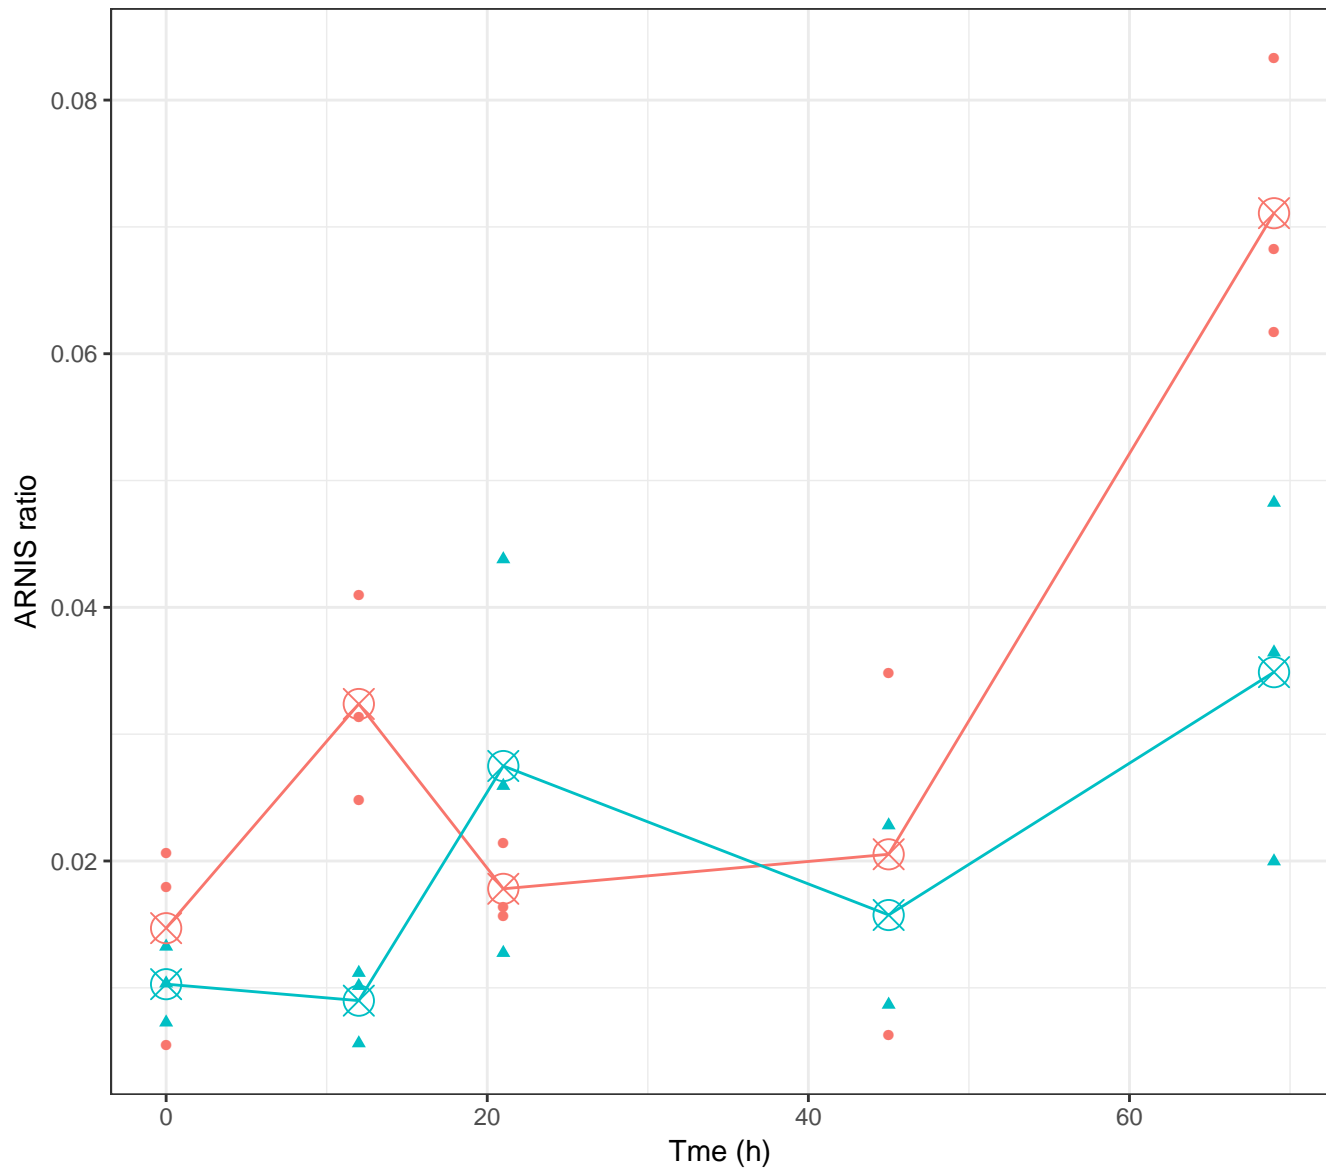

# OTU.250\_Verrucomicrobia\_Verrucomicrobiaceae

Treatment ⊗ Control ⊗ Filtered-1micron

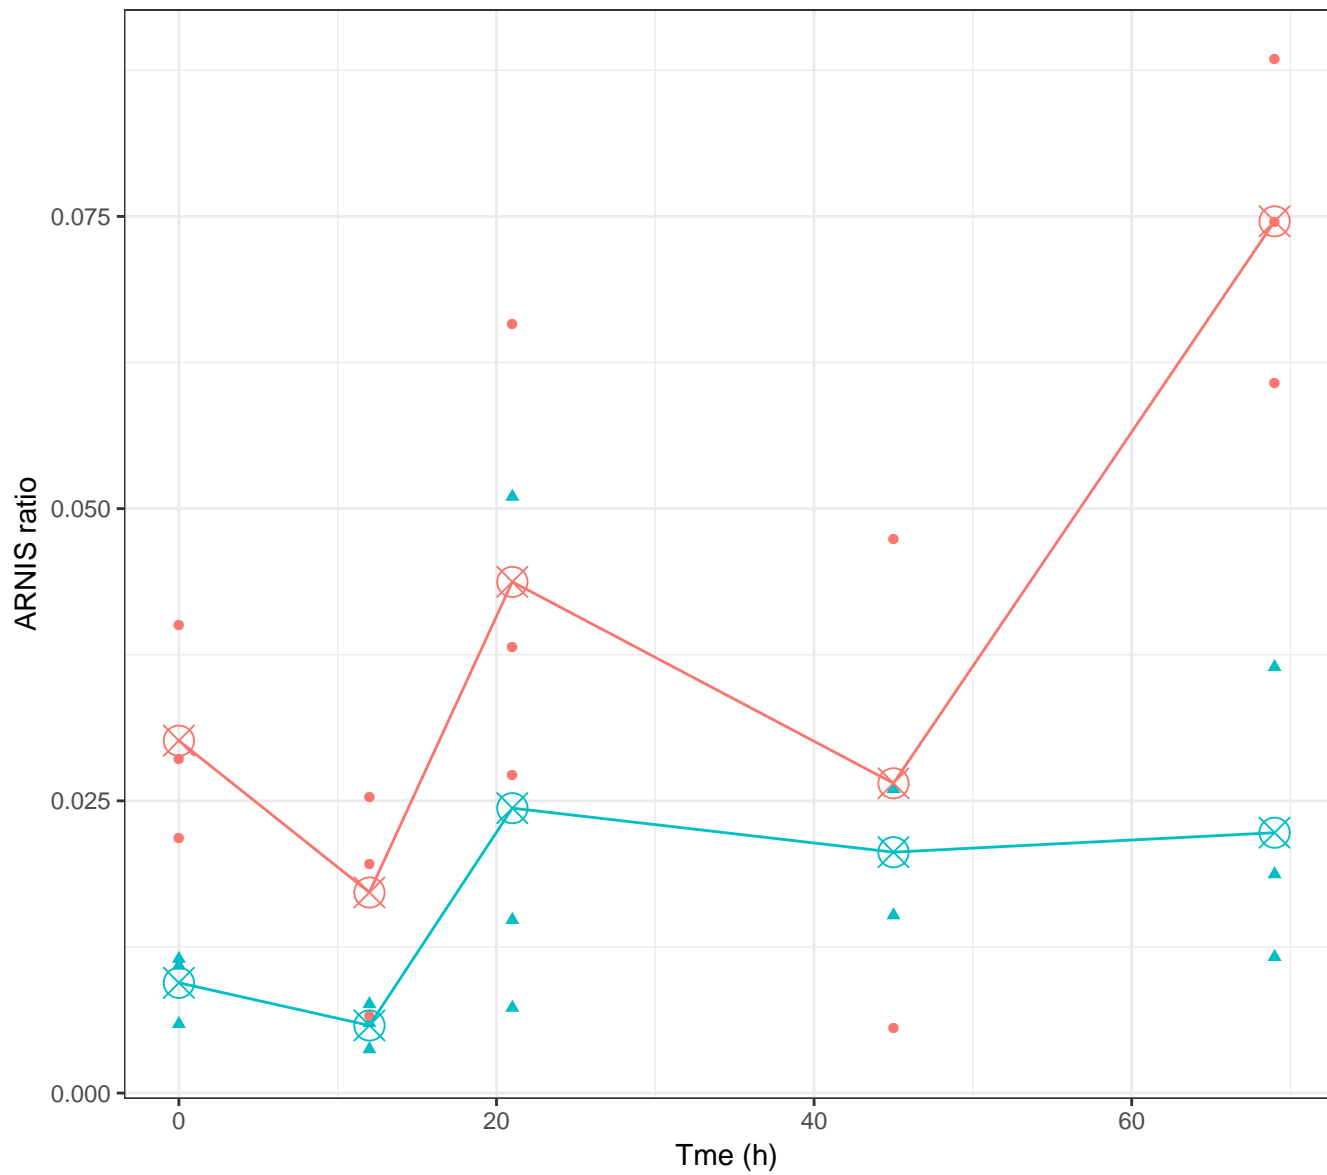

# OTU.229\_Bacteroidetes\_Sphingobacteriales\_LiUU.11.161

Treatment ⊗ Control ⊗ Filtered-1micron

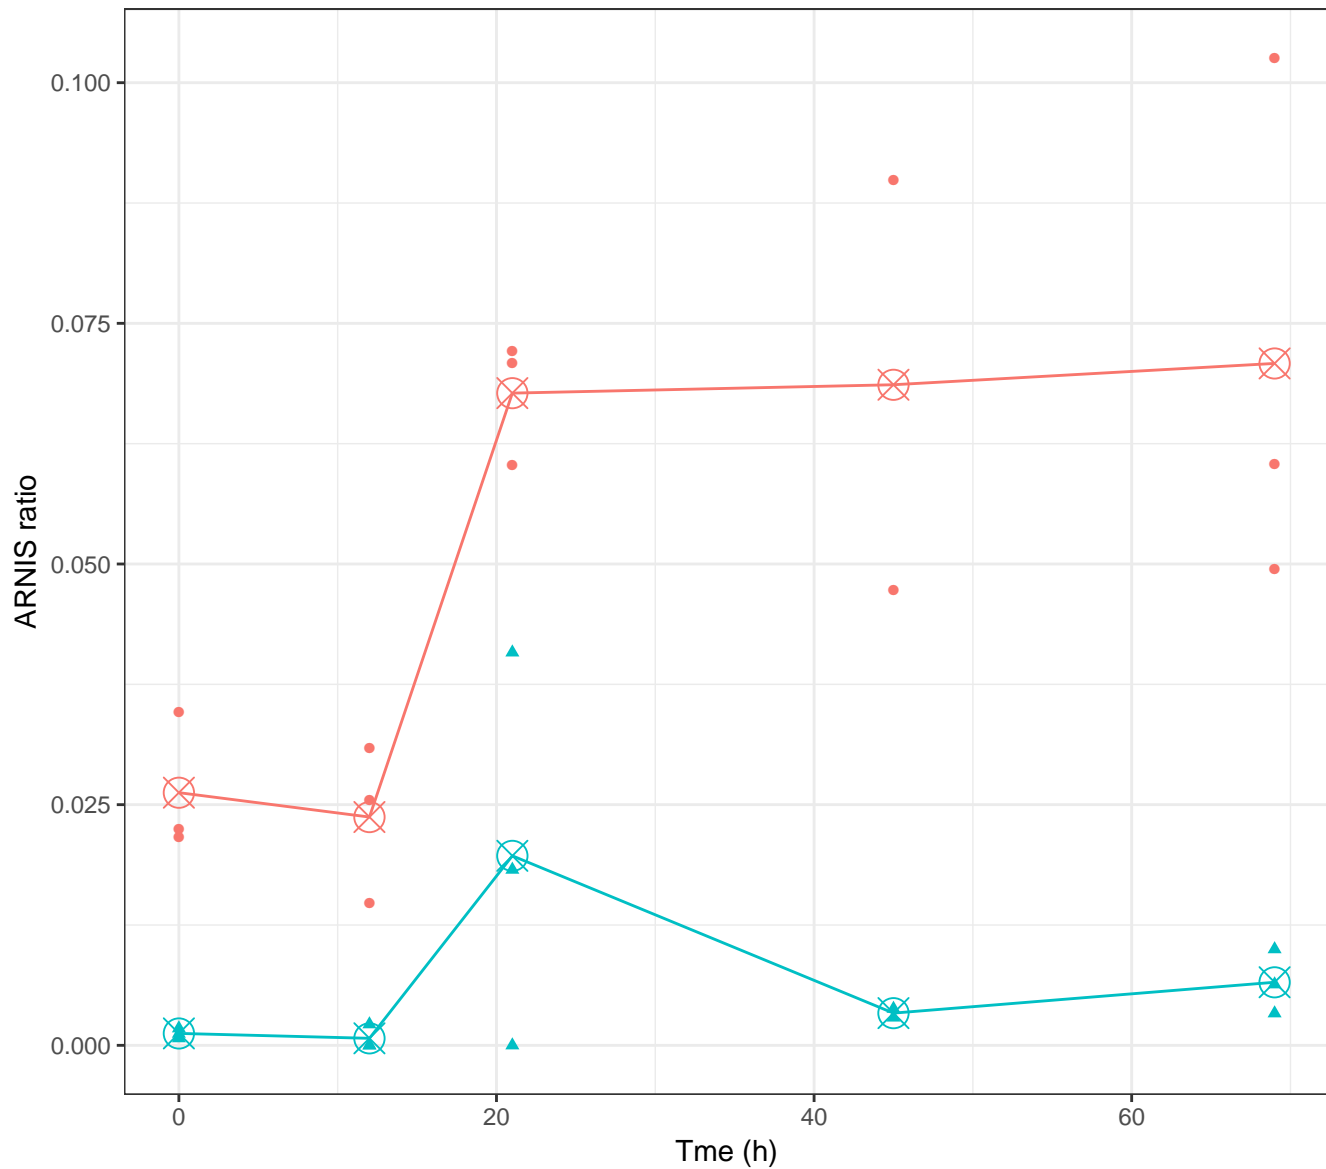

# OTU.203\_Bacteroidetes\_Chitinophagaceae

Treatment Control Filtered-1micron

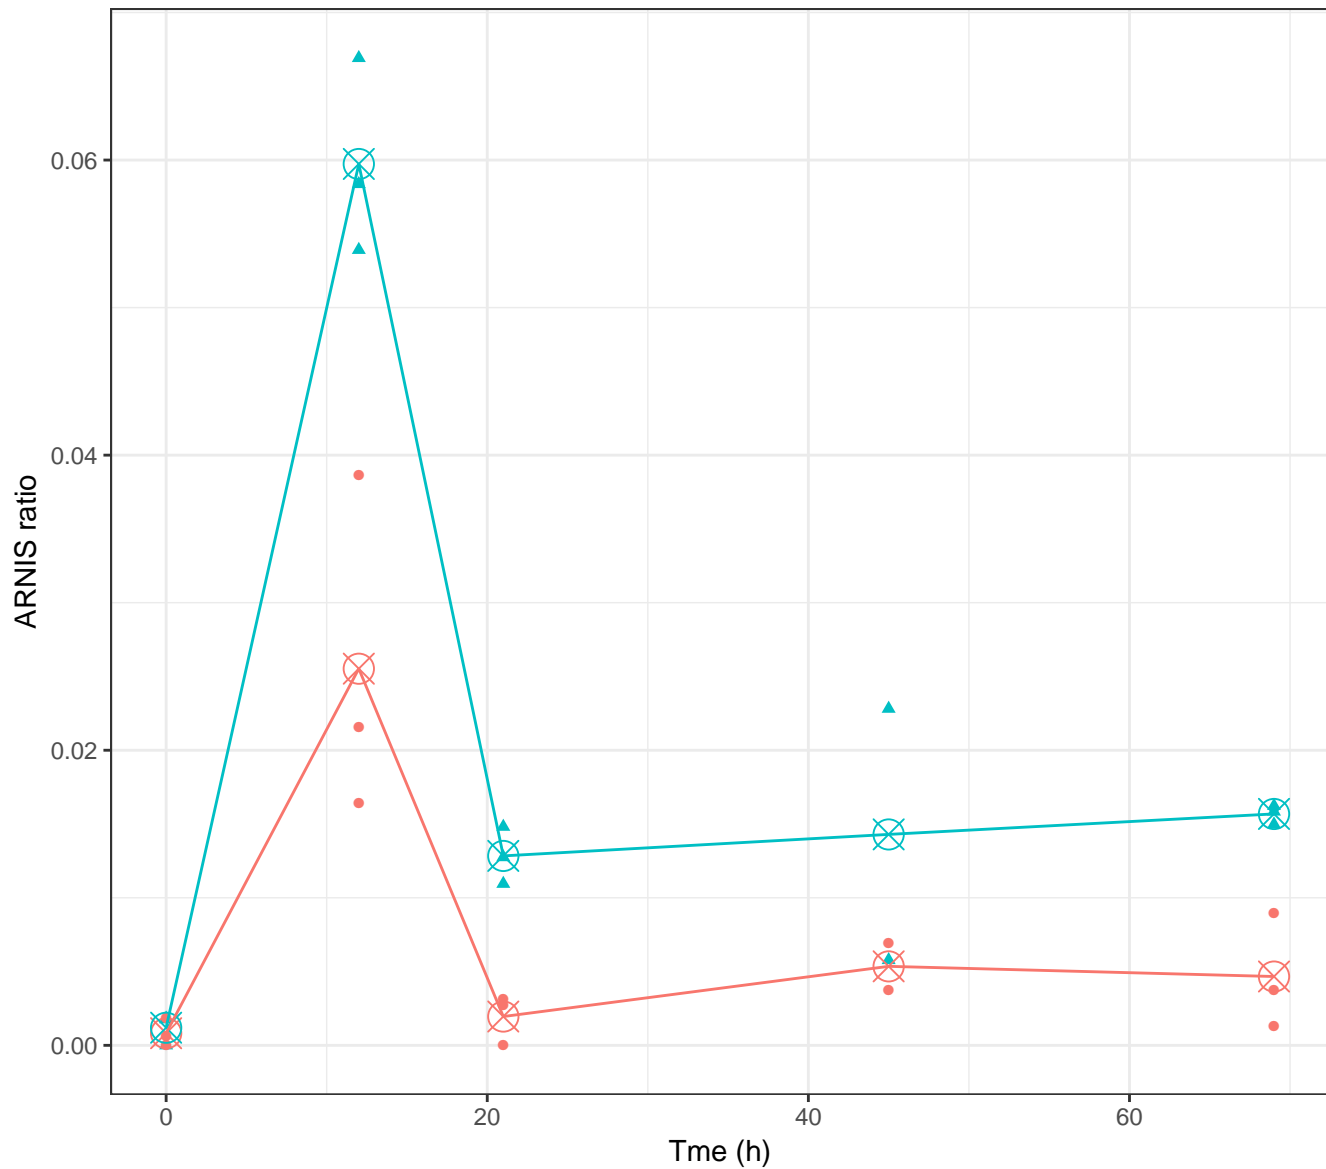

# OTU.207\_Gammaproteobacteria\_Pseudospirillum

Treatment Control Filtered-1micron

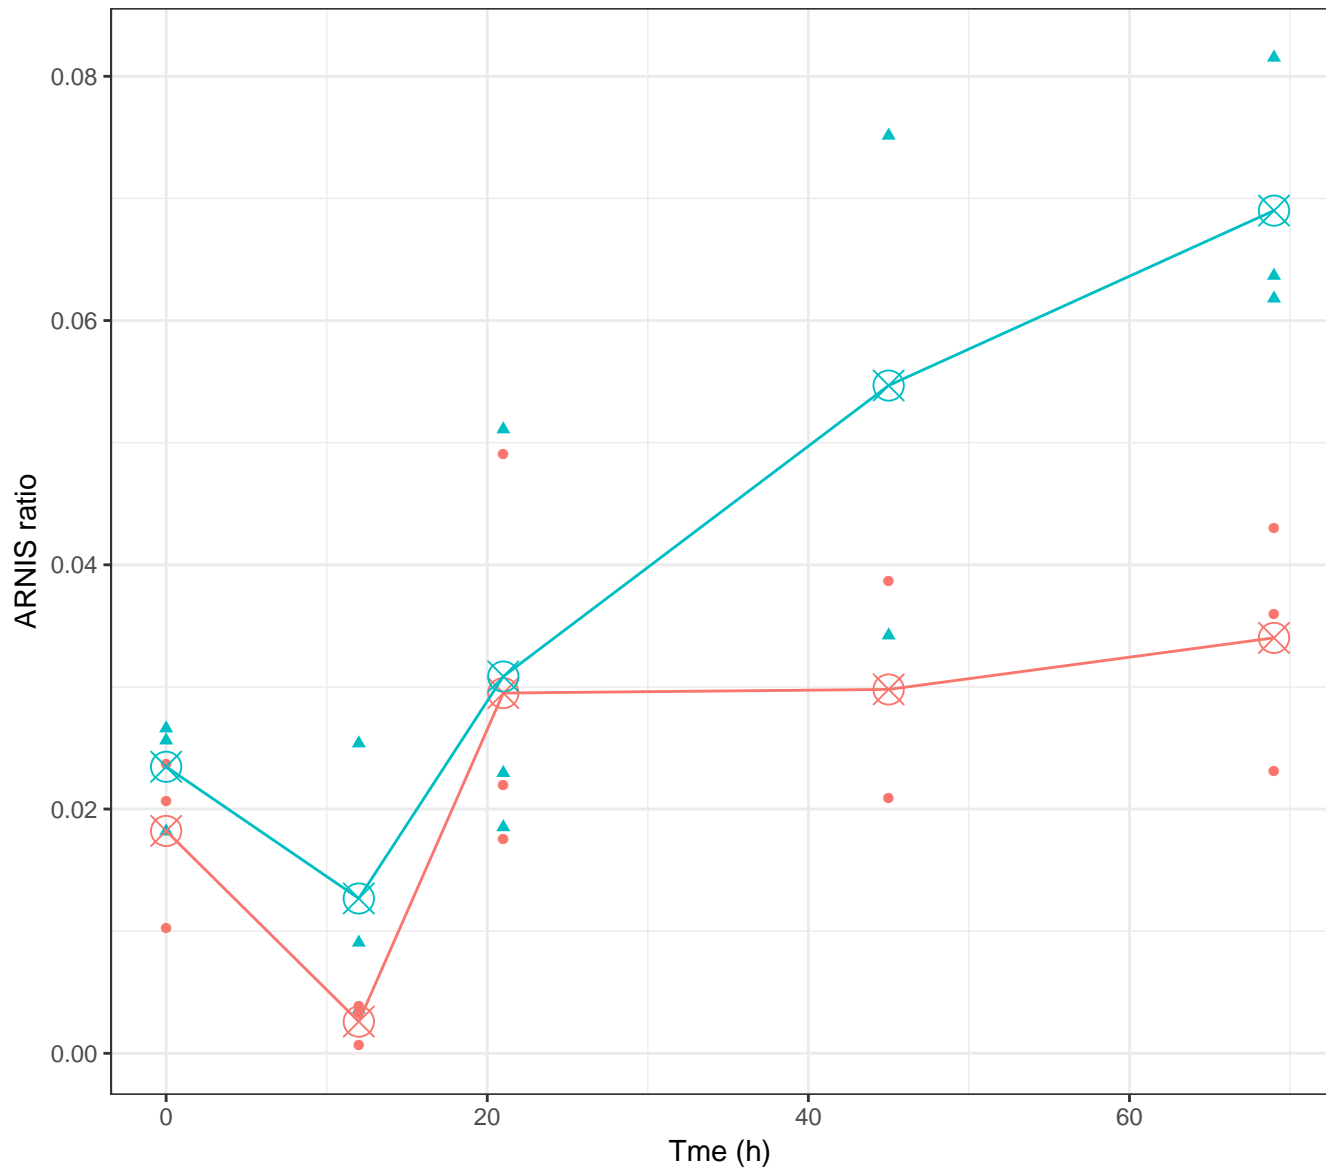

# OTU.231\_Bacteroidetes\_Saprospiraceae

Treatment Control Filtered-1micron

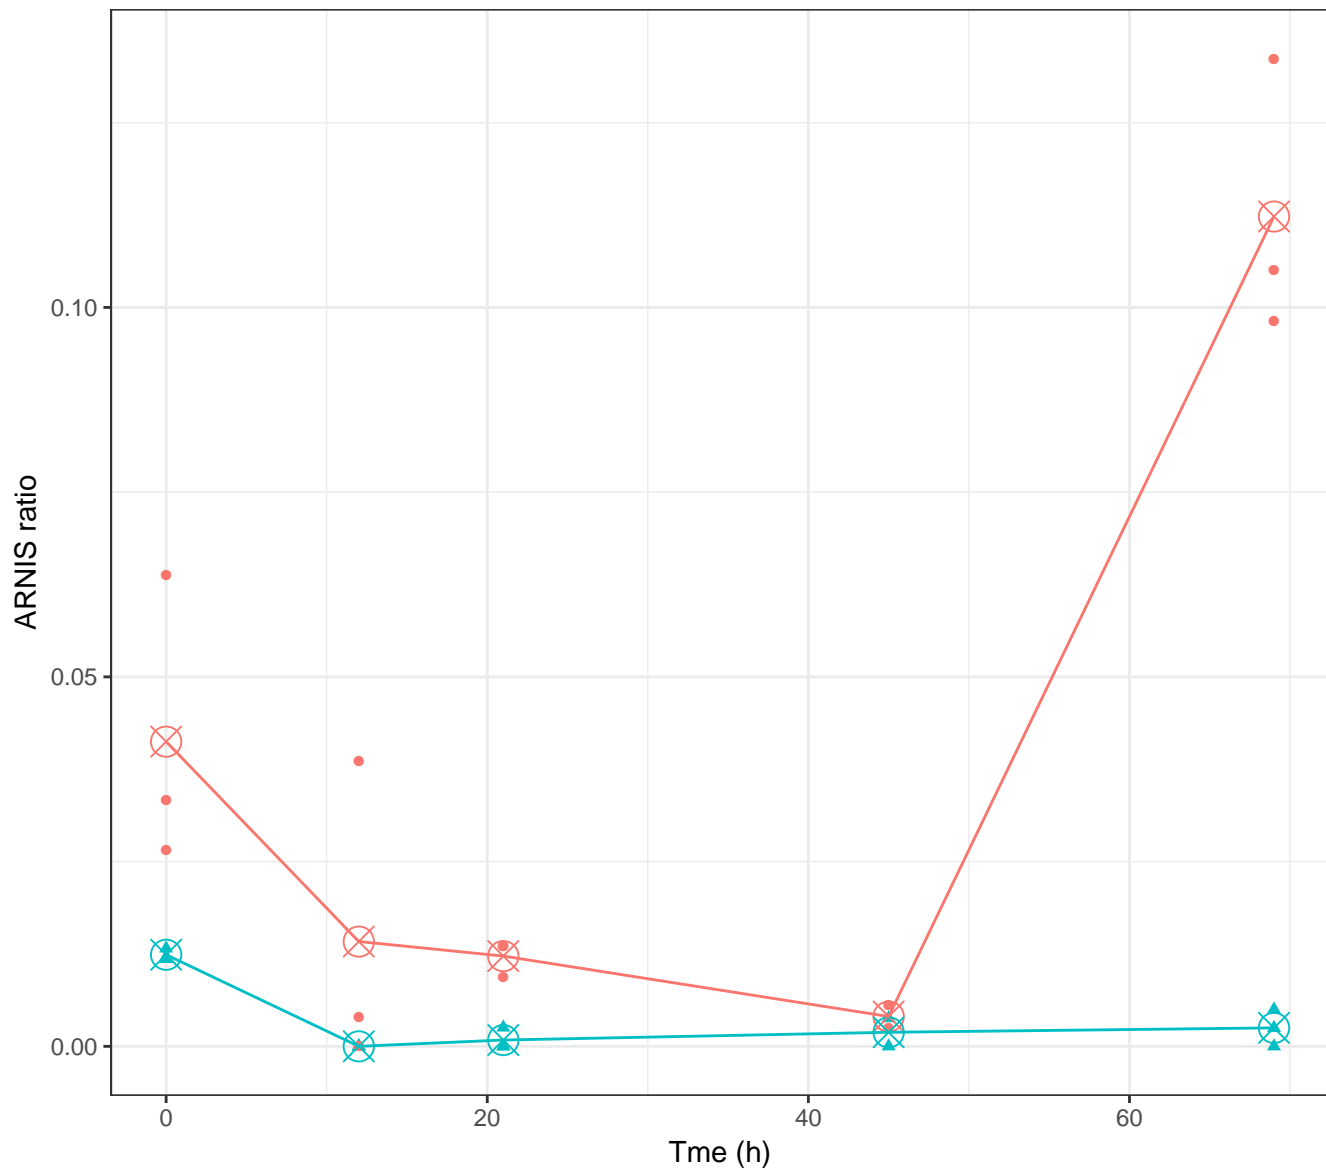

## OTU.237\_Chloroflexi\_Caldilinea

Treatment Control Filtered-1micron

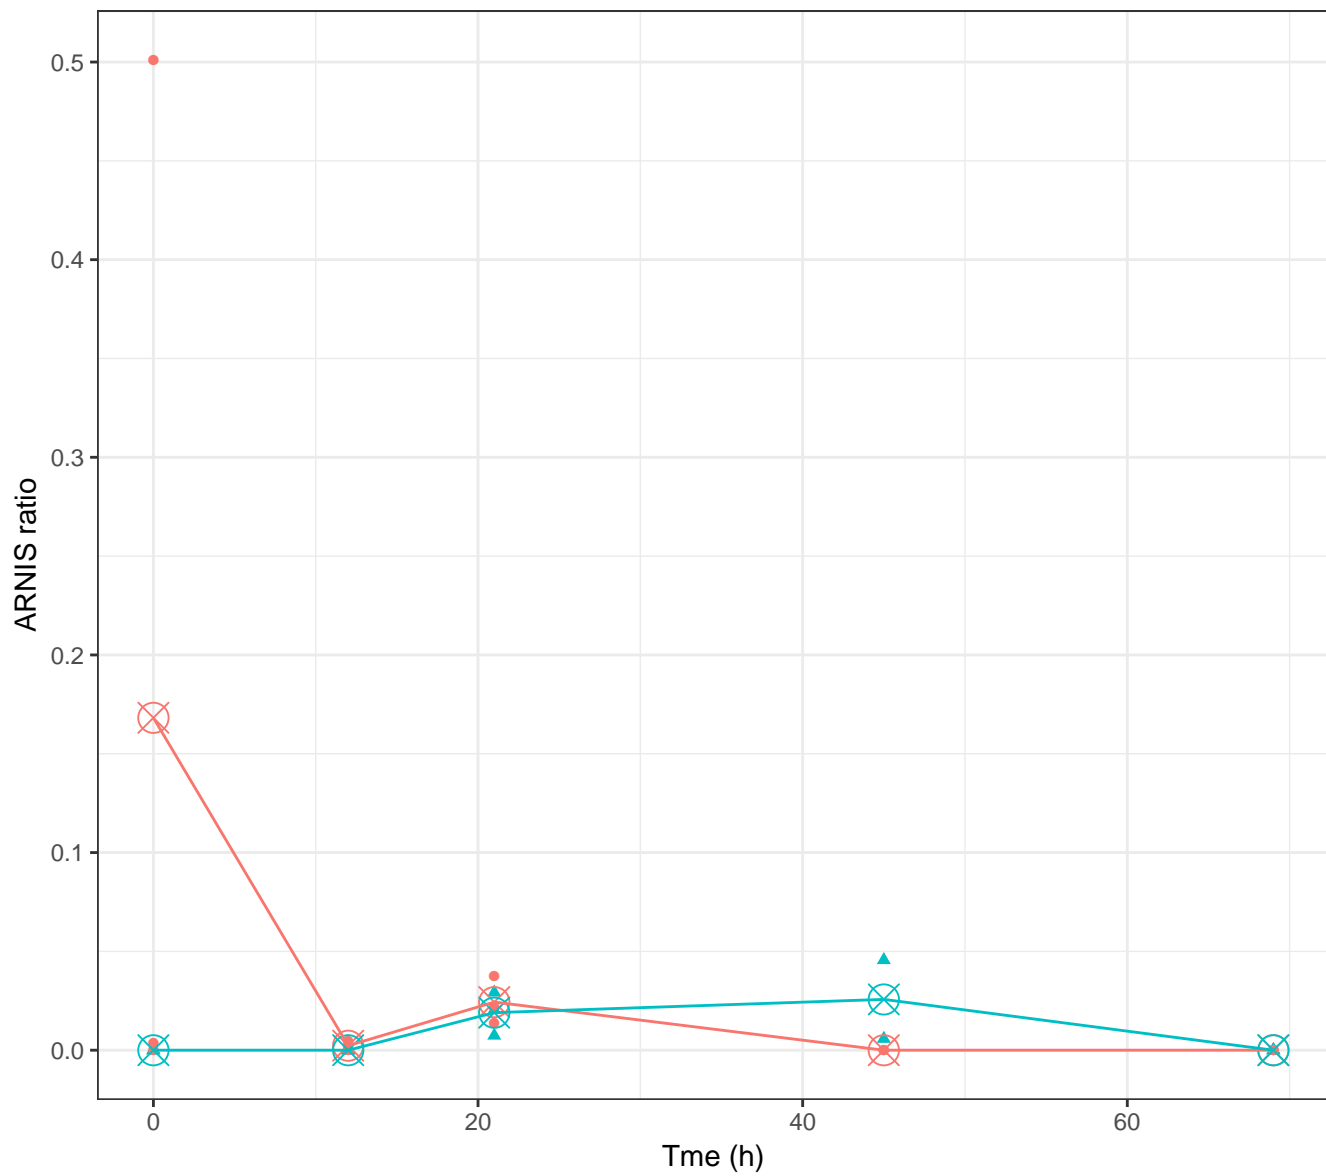

# OTU.329\_Verrucomicrobia\_Opitutus

Treatment ⊗ Control ⊗ Filtered-1micron

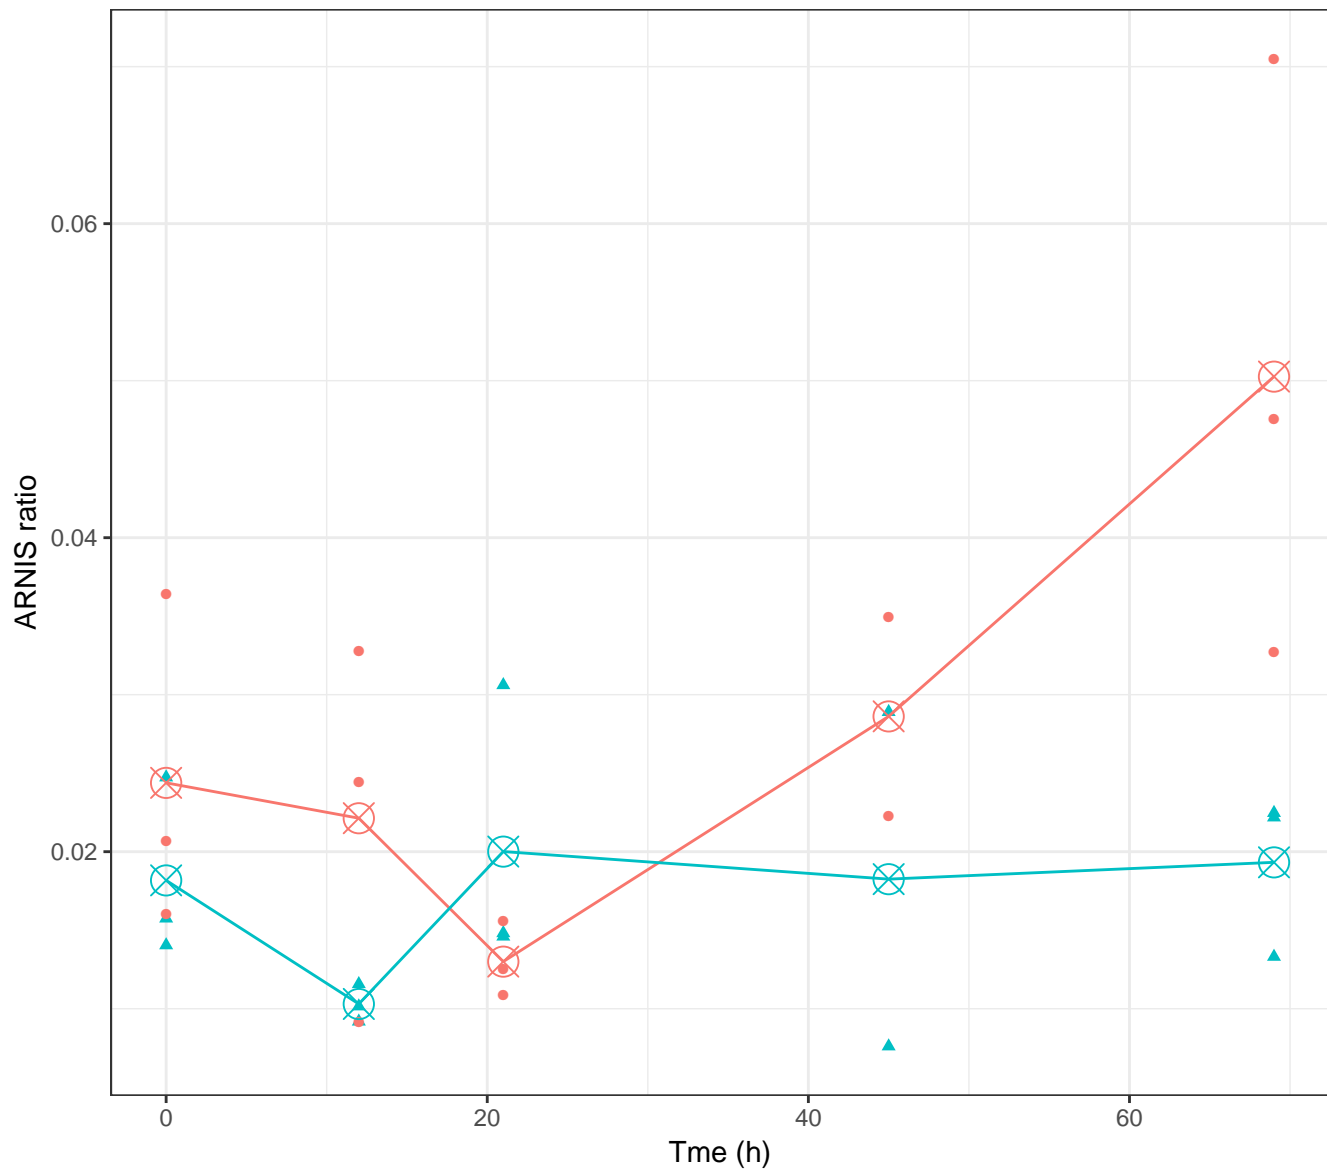



# OTU.325\_Verrucomicrobia\_Verrucomicrobiaceae

Treatment Control Filtered-1micron

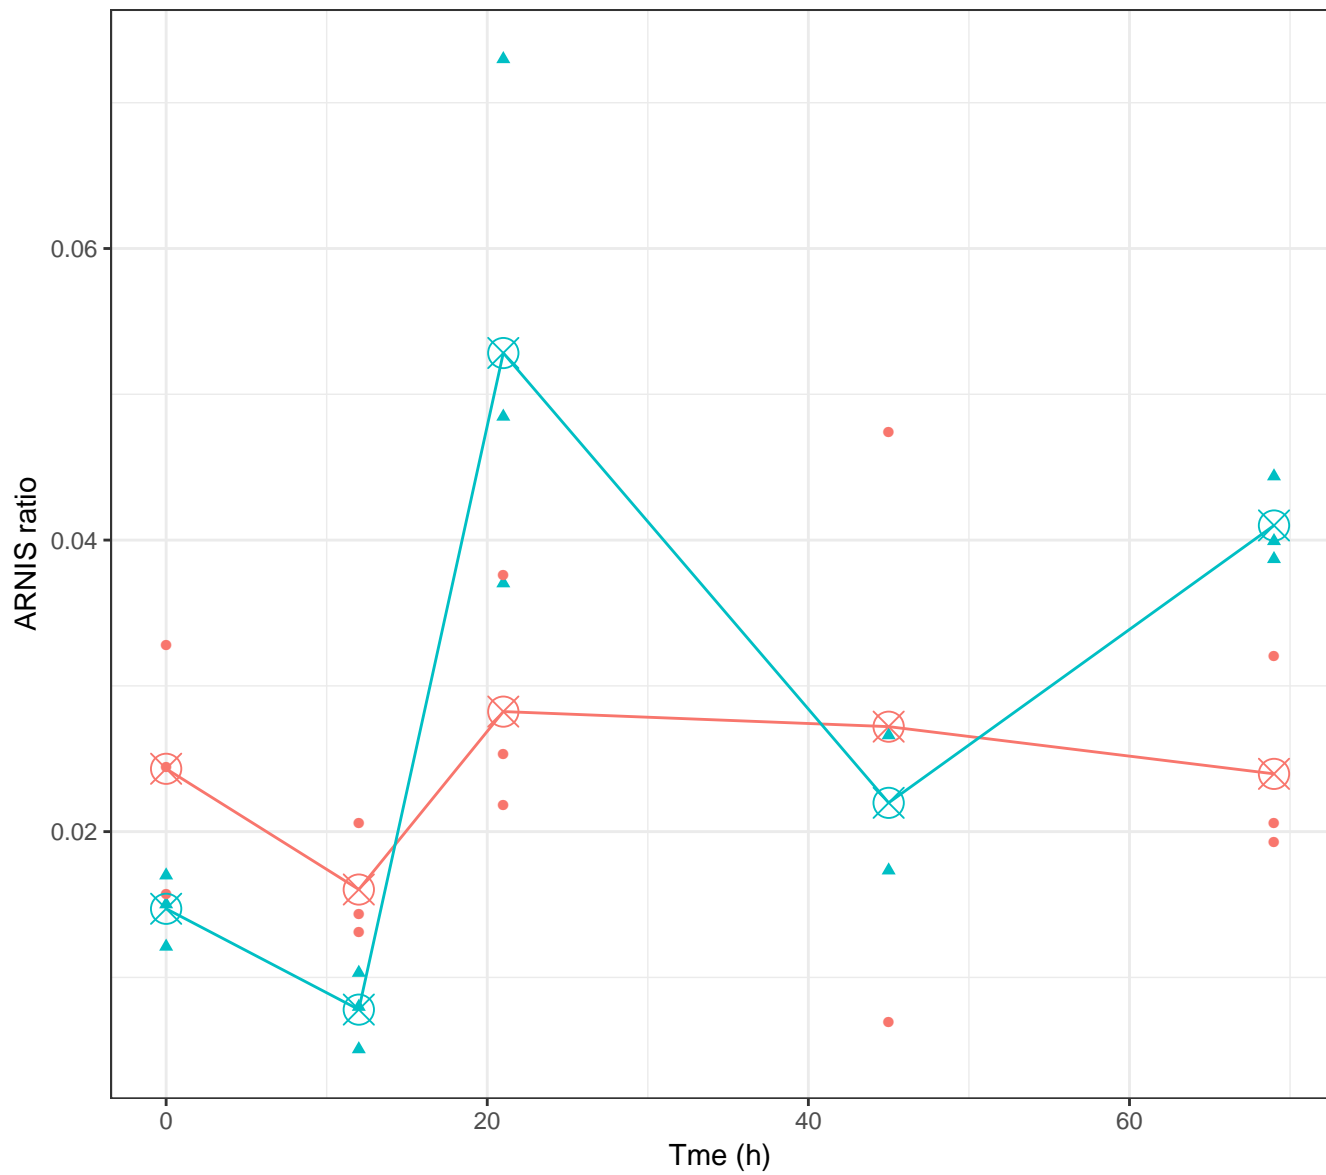

# OTU.276\_Gemmatimonadetes\_Gemmatimonas

Treatment Control Filtered-1micron

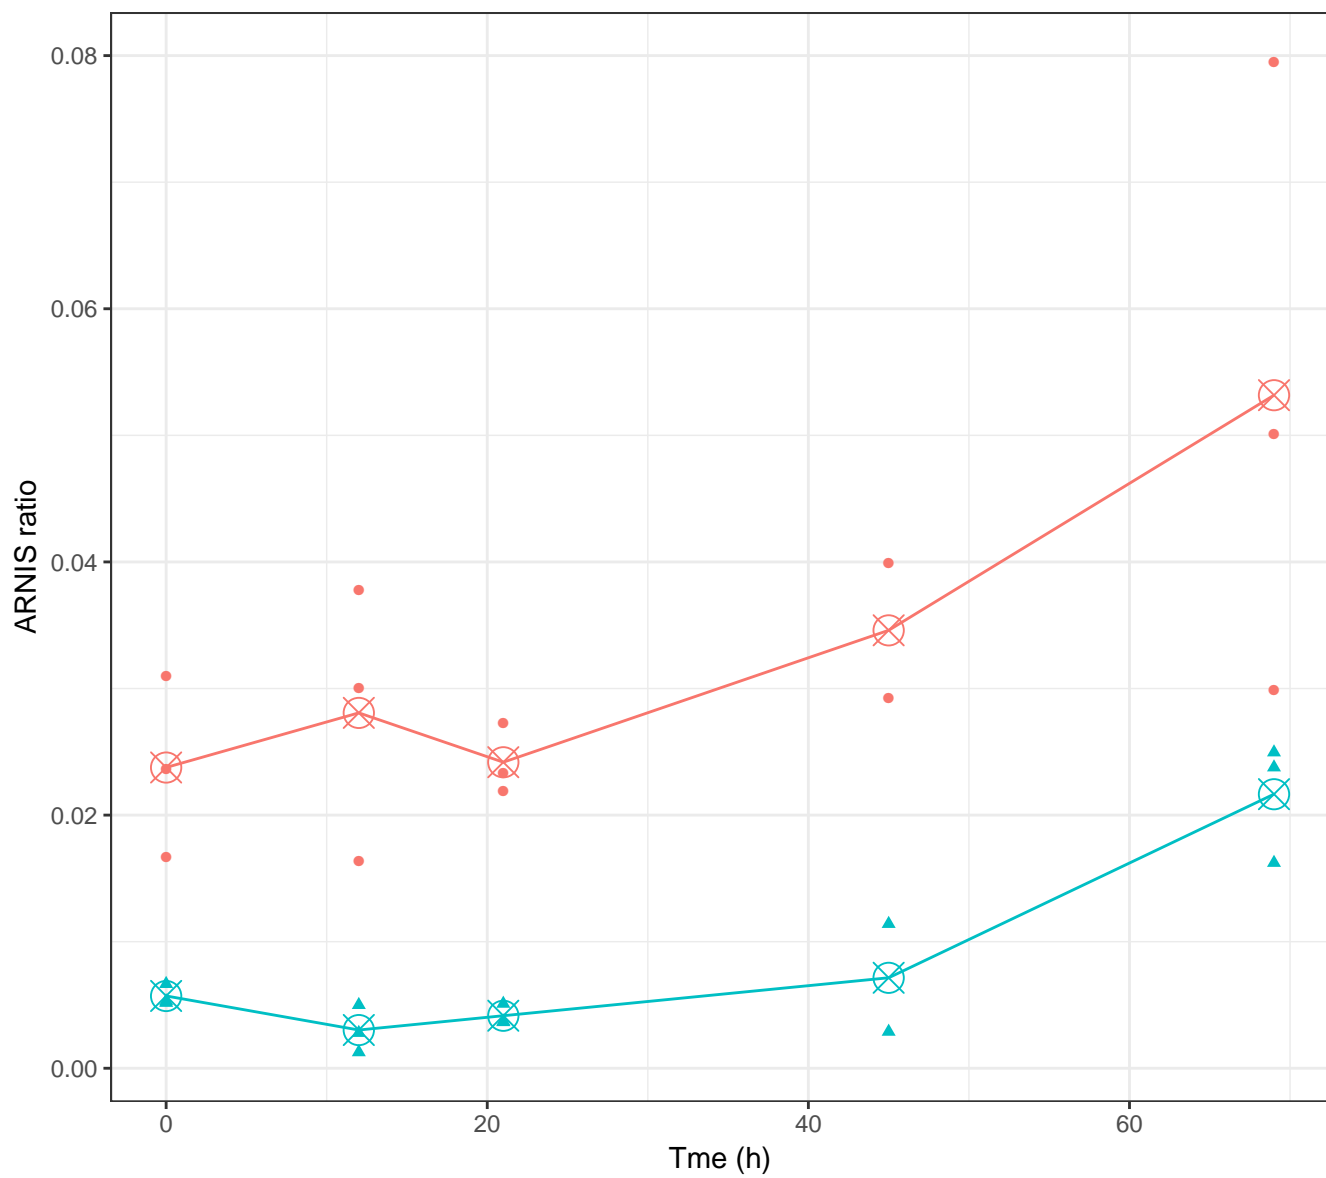

# OTU.267\_Bacteroidetes\_Cytophagaceae

Treatment Control Filtered-1micron

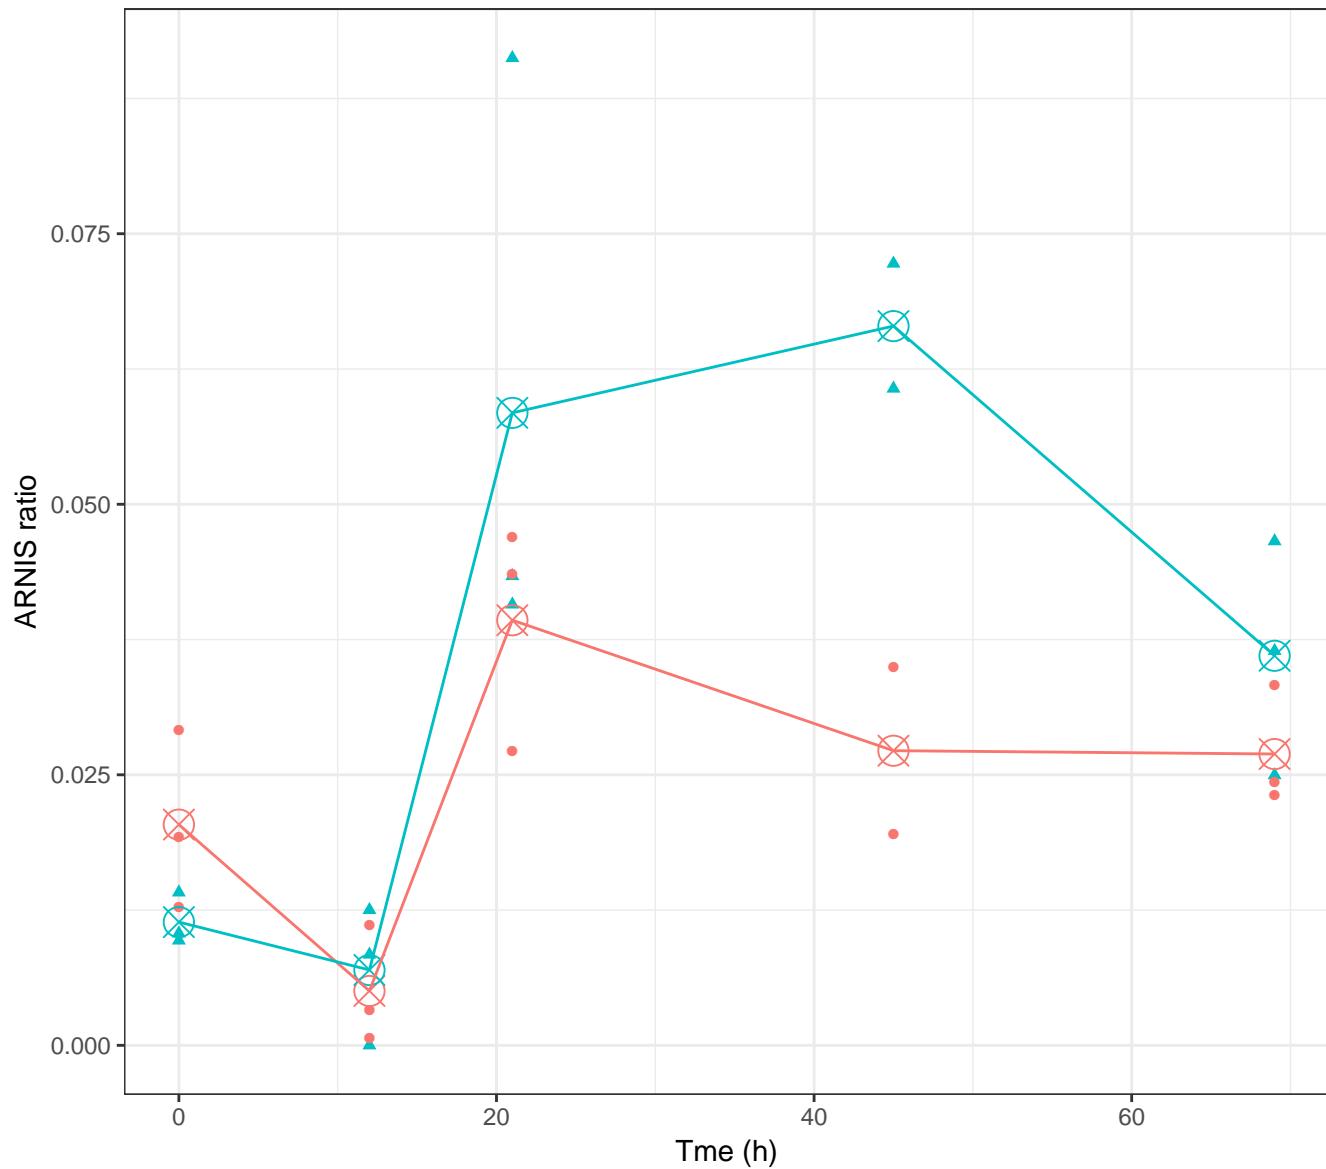

# OTU.260\_Spirochaetes\_Leptospira

Treatment Control Filtered-1micron

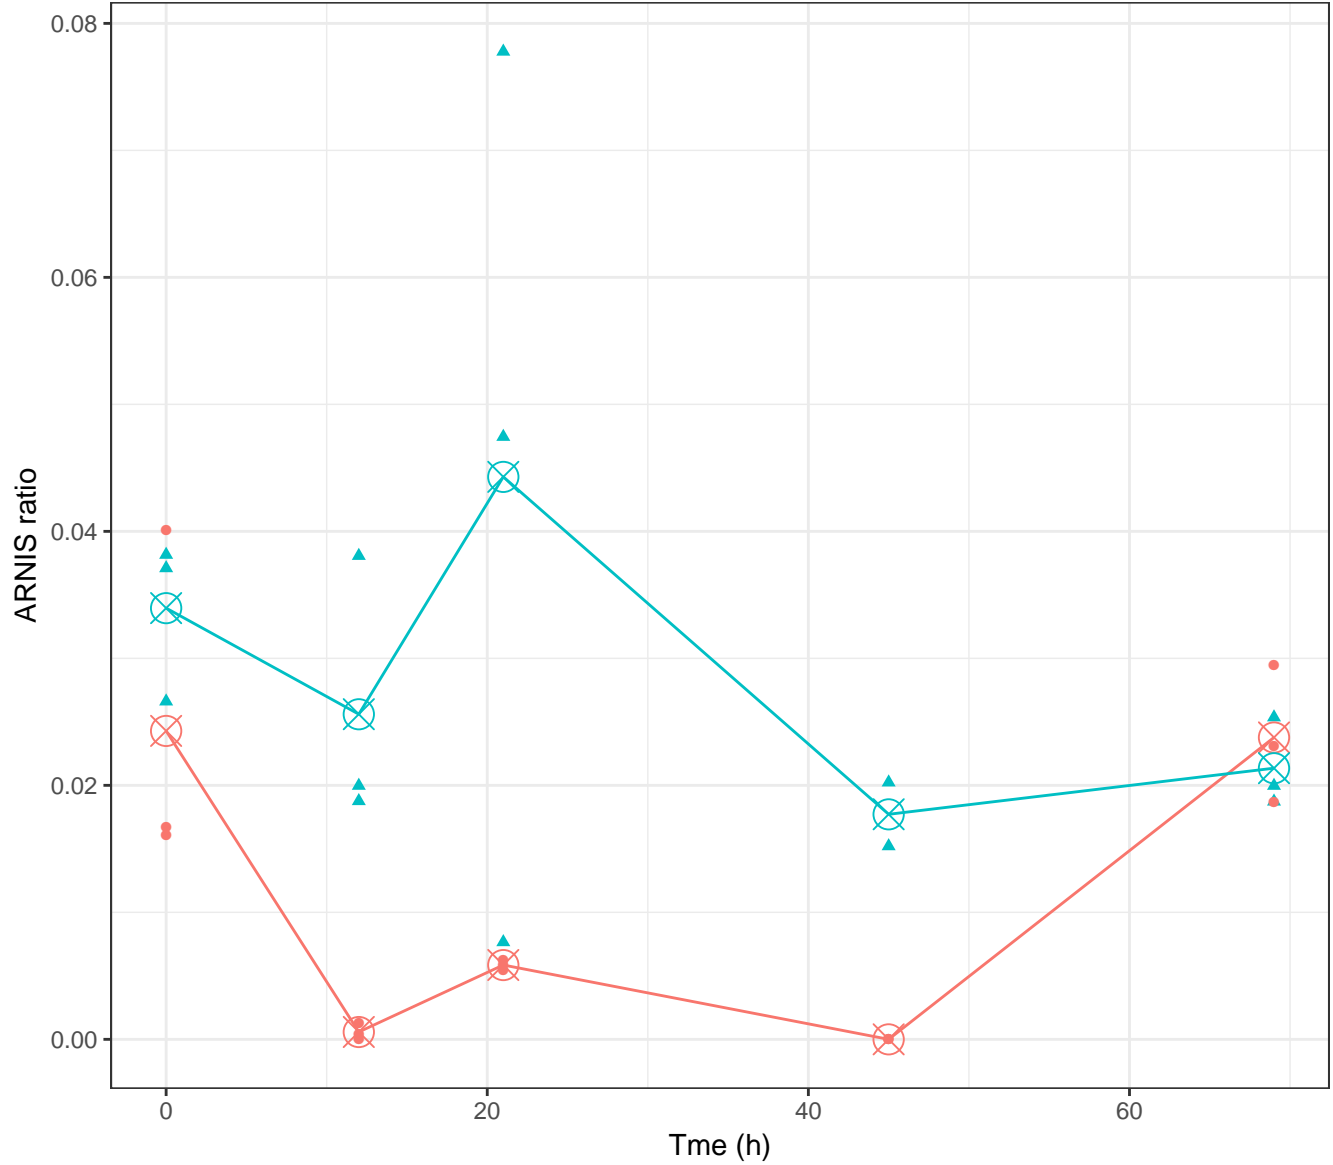

## OTU.264\_Proteobacteria\_TA18

Treatment Control Filtered-1micron

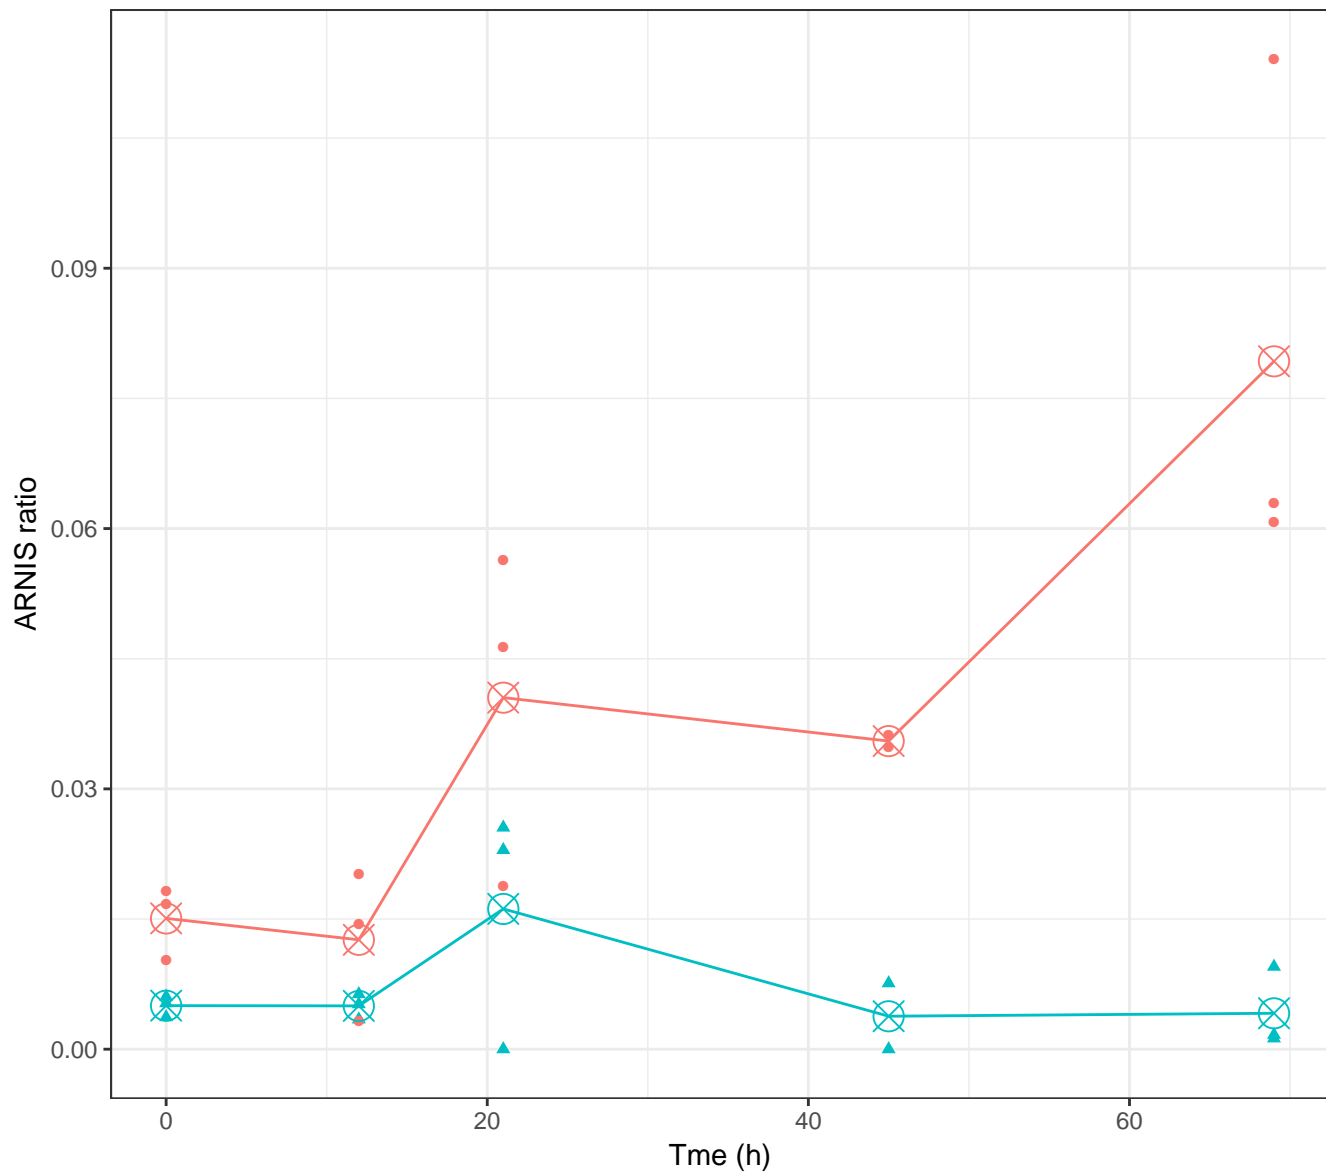

# OTU.27\_Betaproteobacteria\_Methylotenera

Treatment Control Filtered-1micron

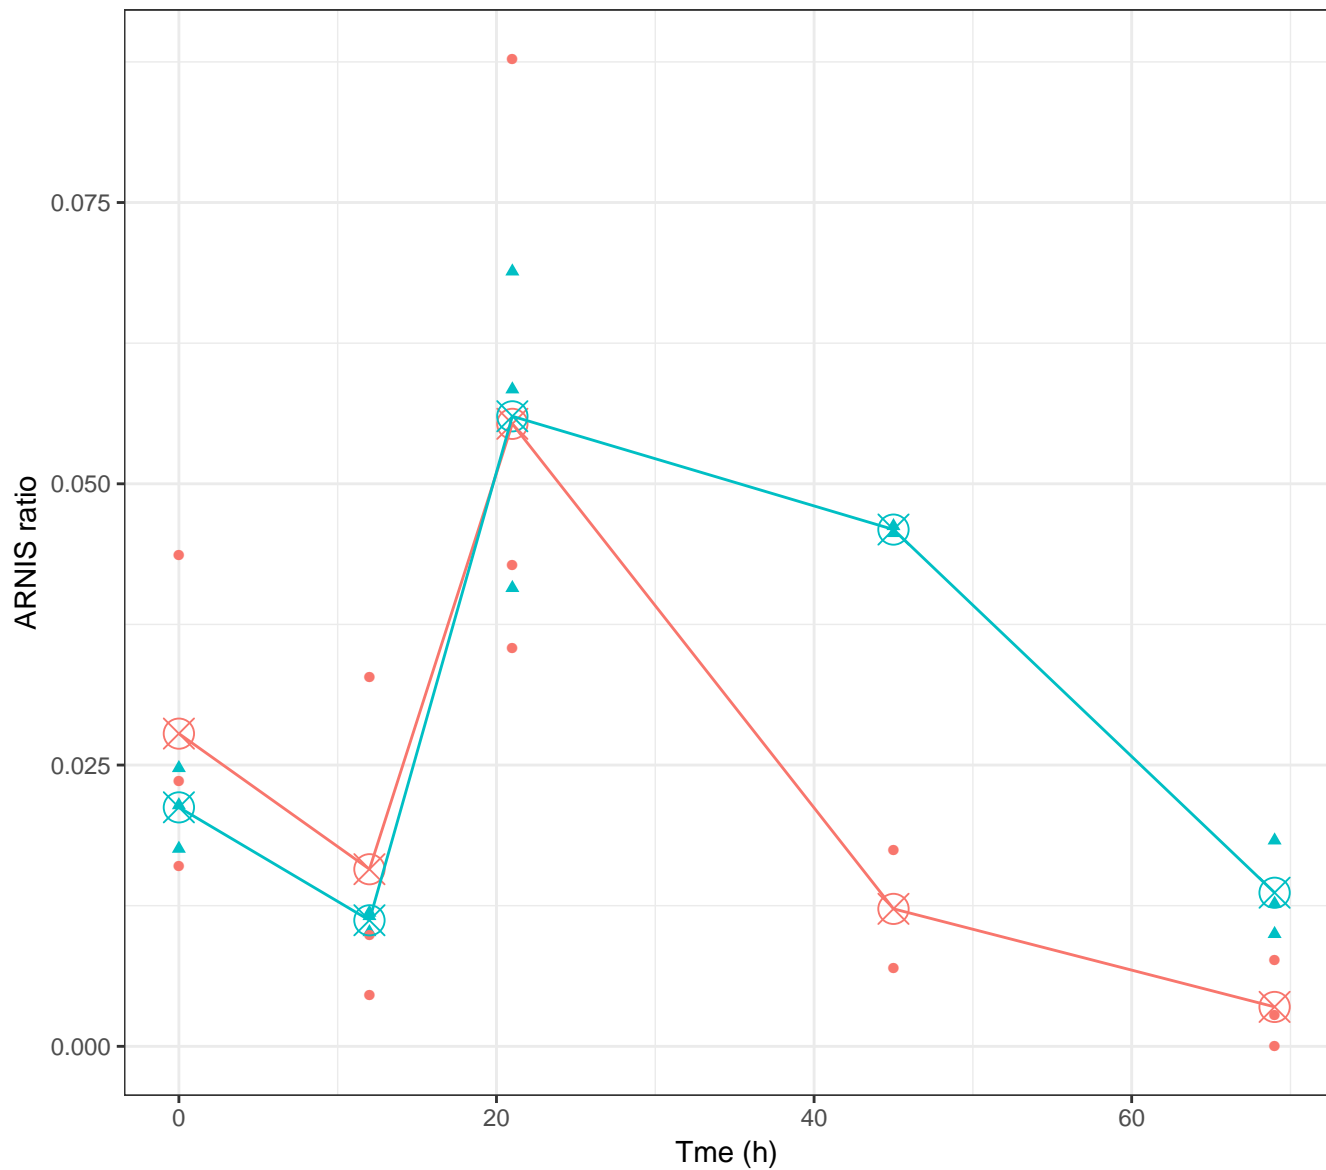

# OTU.262\_Alphaproteobacteria\_Sphingomonadales

Treatment Control Filtered-1micron

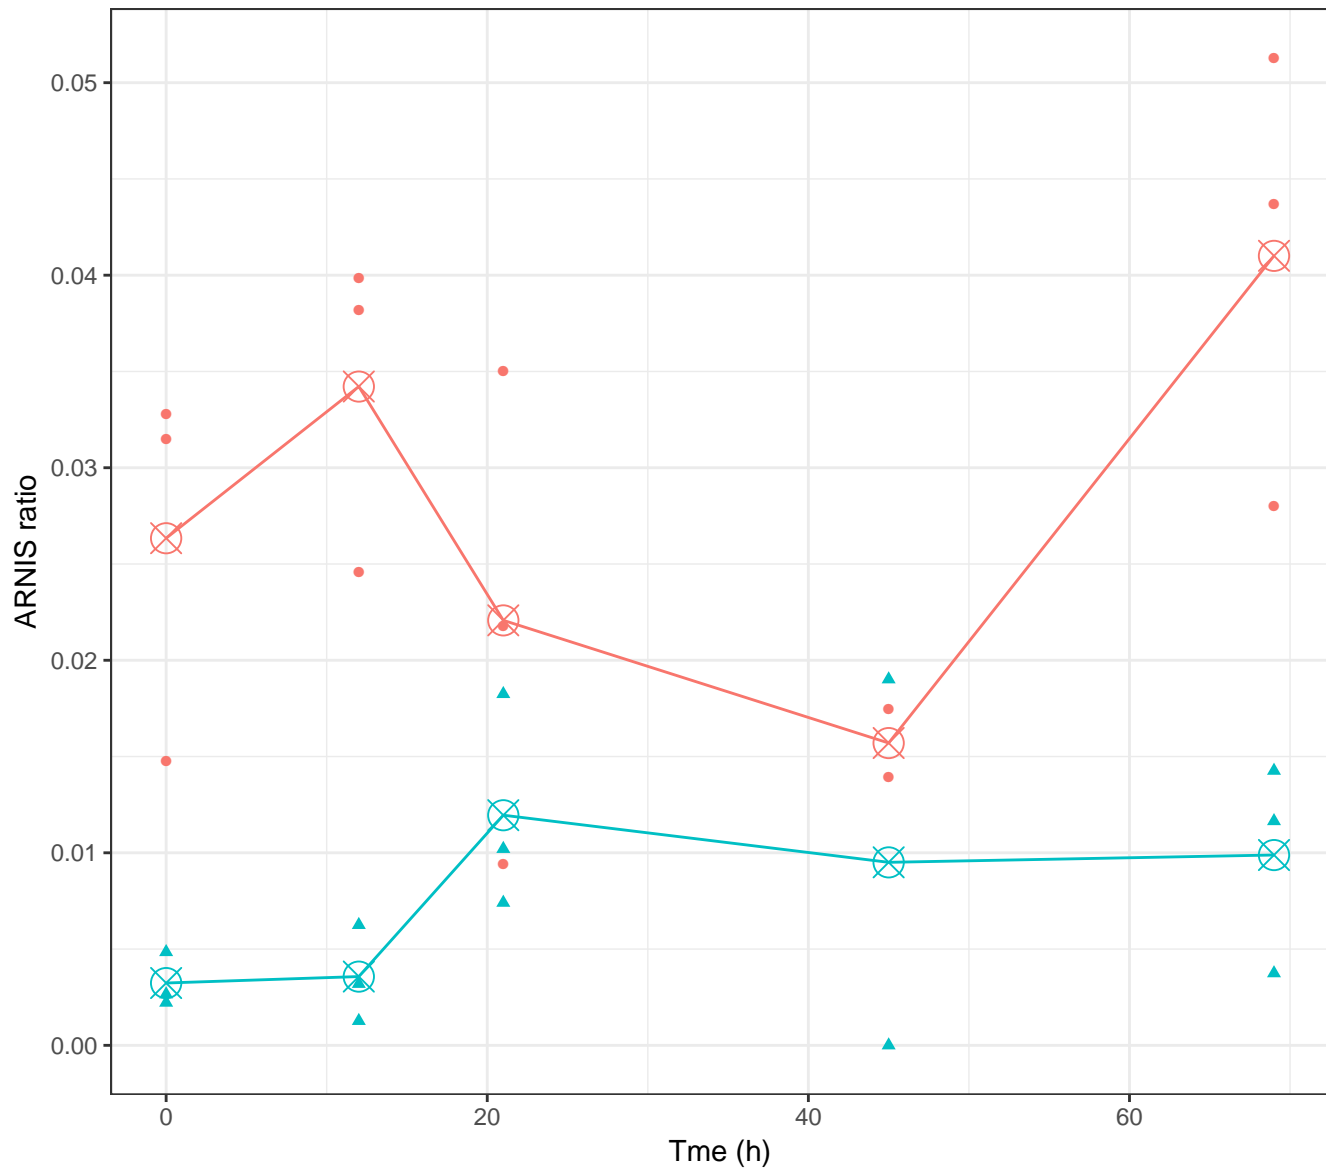

# OTU.402\_Bacteroidetes\_Chryseobacterium

Treatment Control Filtered-1micron

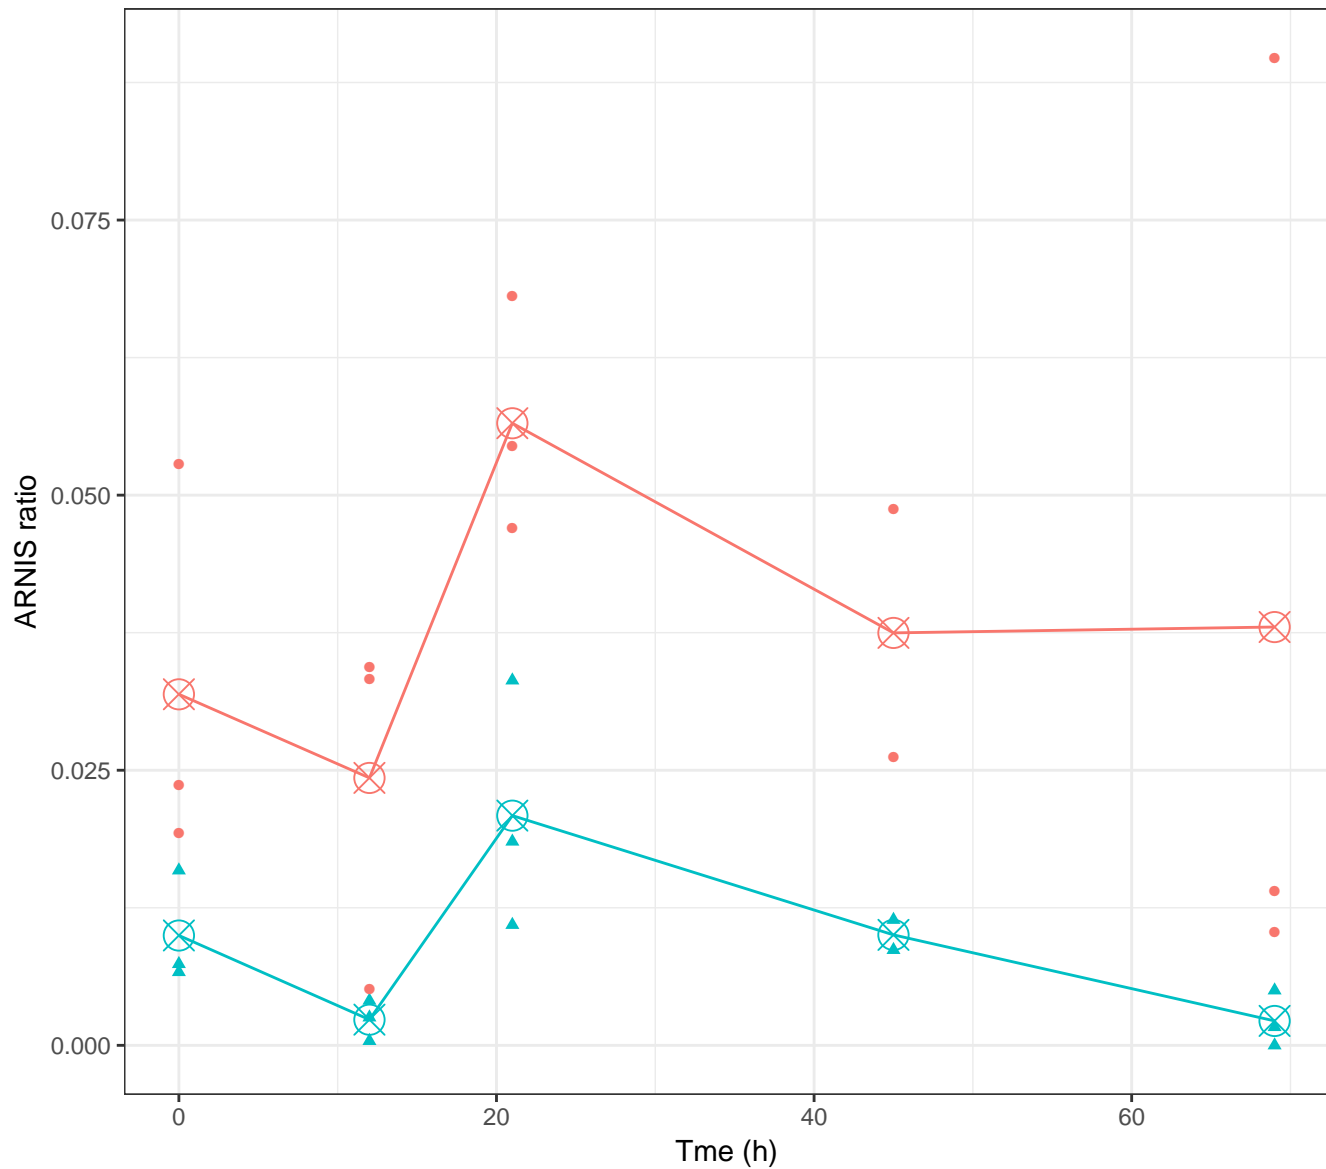



# OTU.273\_Bacteroidetes\_Siphonobacter

Treatment Control Filtered-1micron

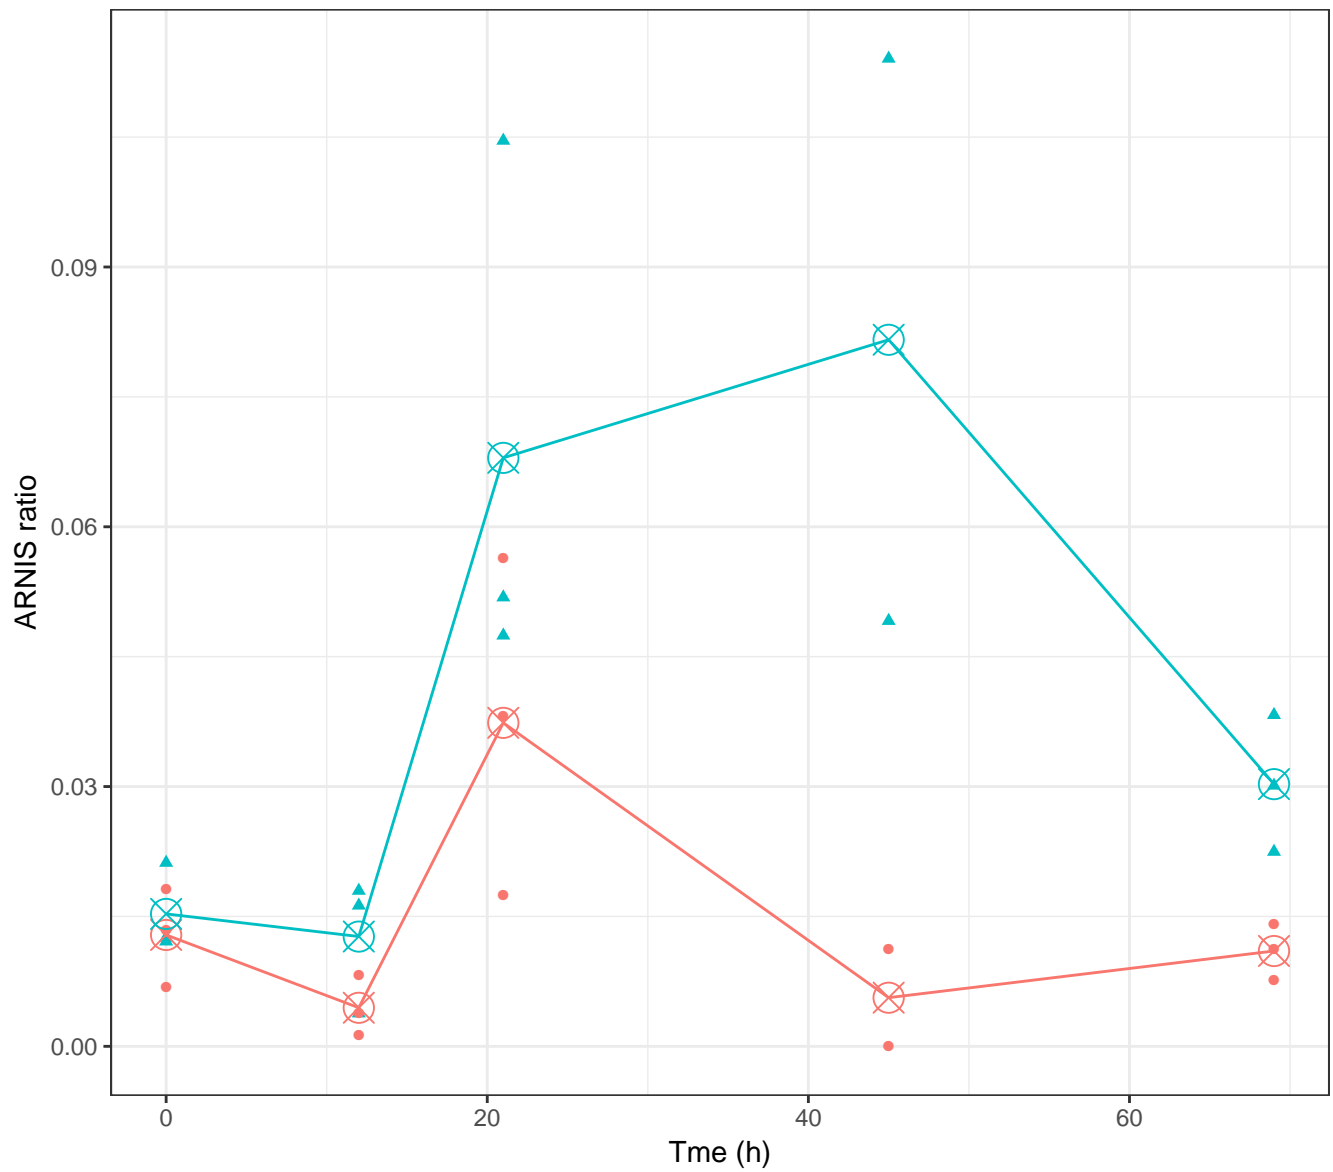

# OTU.190\_Firmicutes\_Staphylococcus

Treatment Control Filtered-1micron

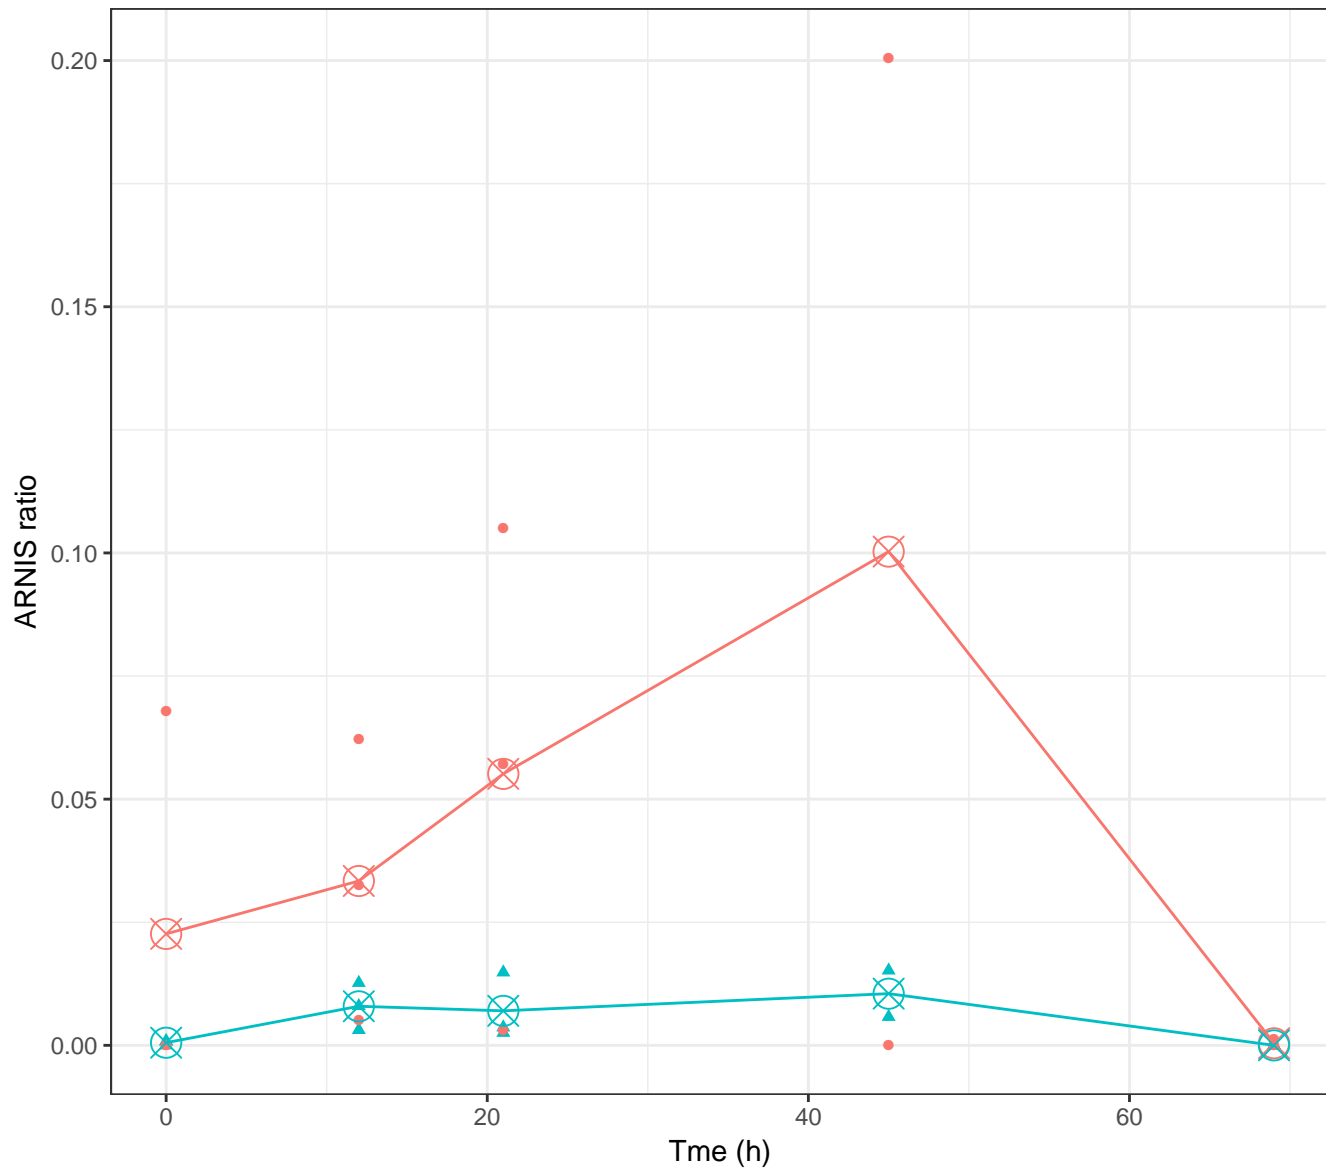

# OTU.319\_Alphaproteobacteria\_Methylobacterium

Treatment Control Filtered-1micron

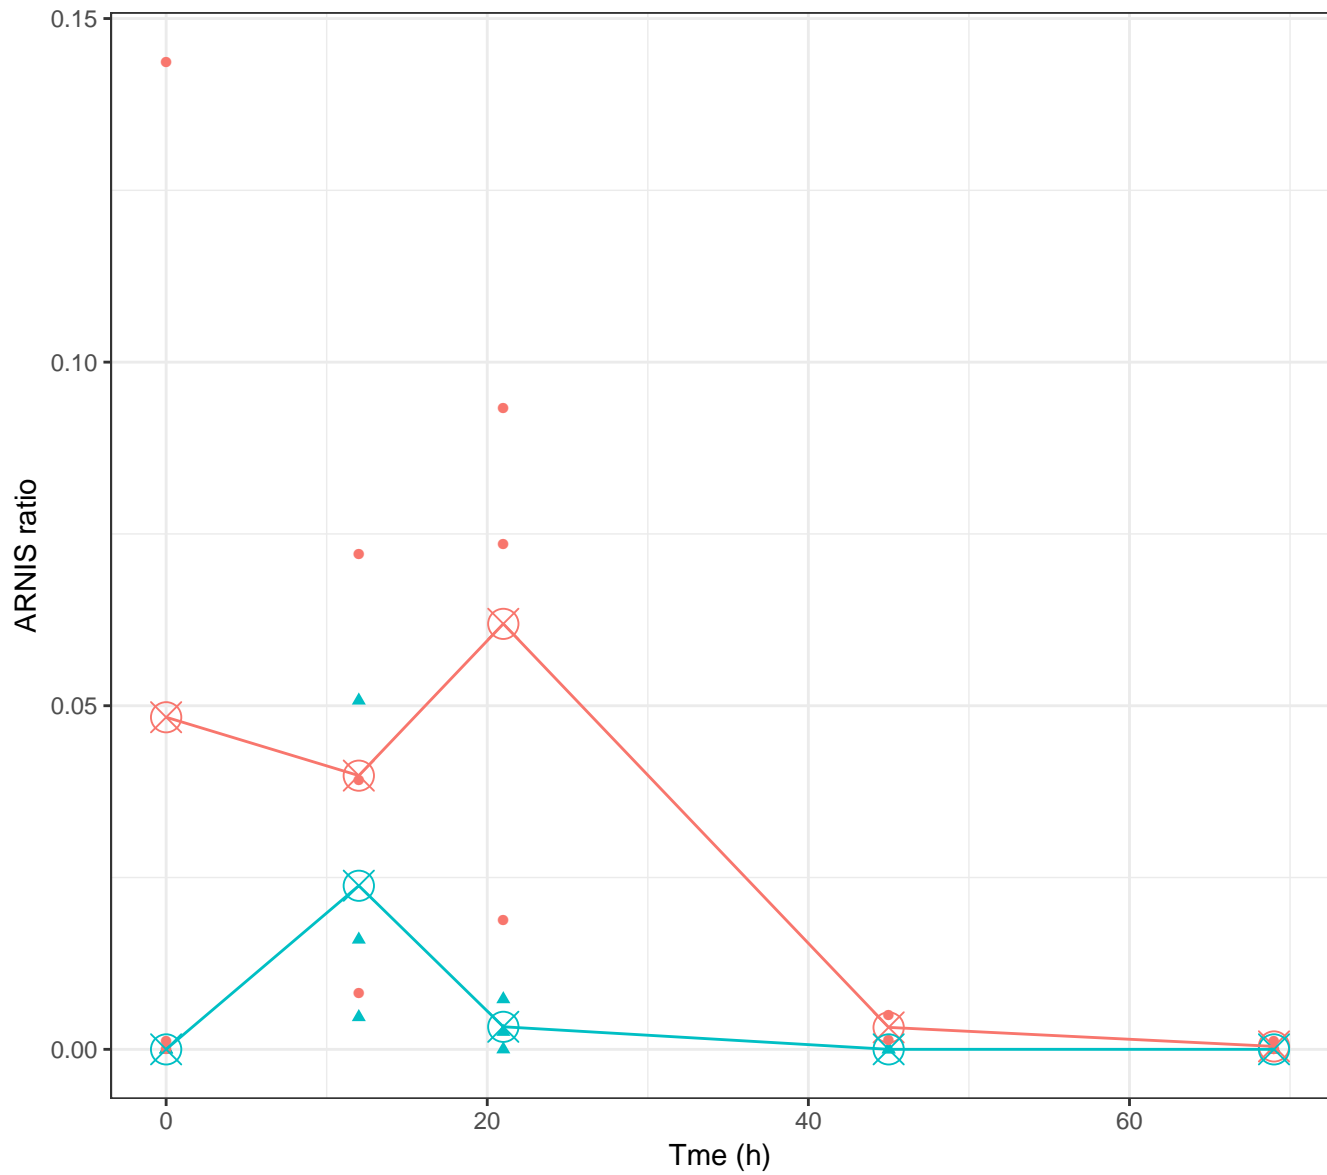

## OTU.316\_Planctomycetes\_CL500.3

Treatment  Control  Filtered-1micron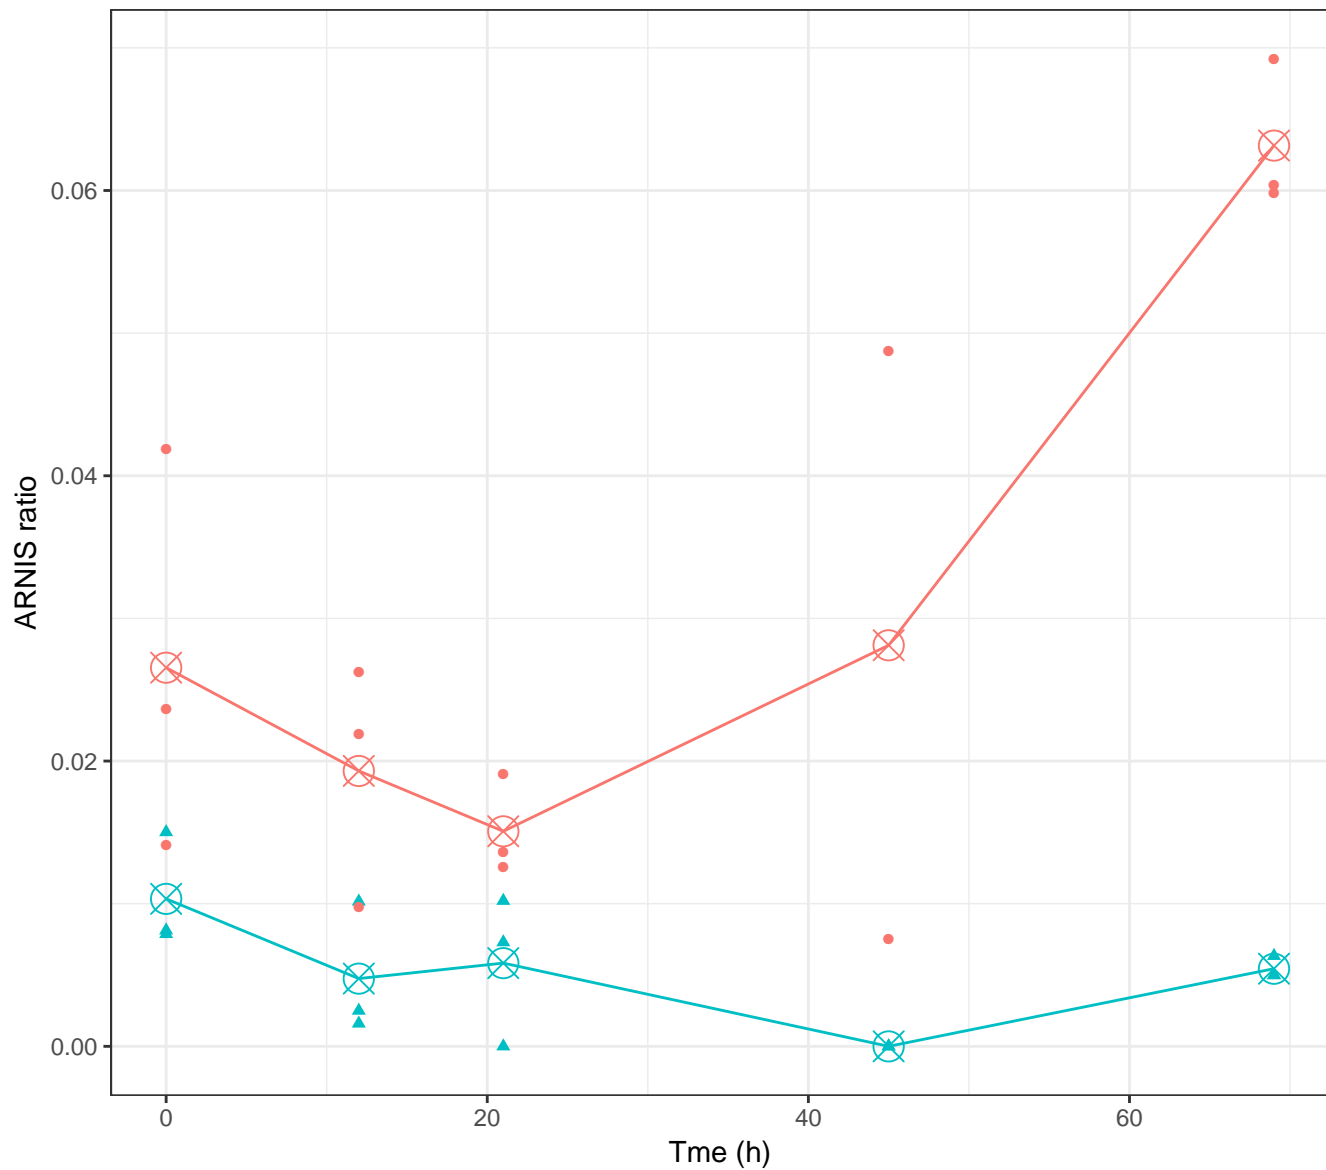

# OTU.94\_Bacteroidetes\_env.OPS\_17

Treatment ⊗ Control ⊗ Filtered-1micron

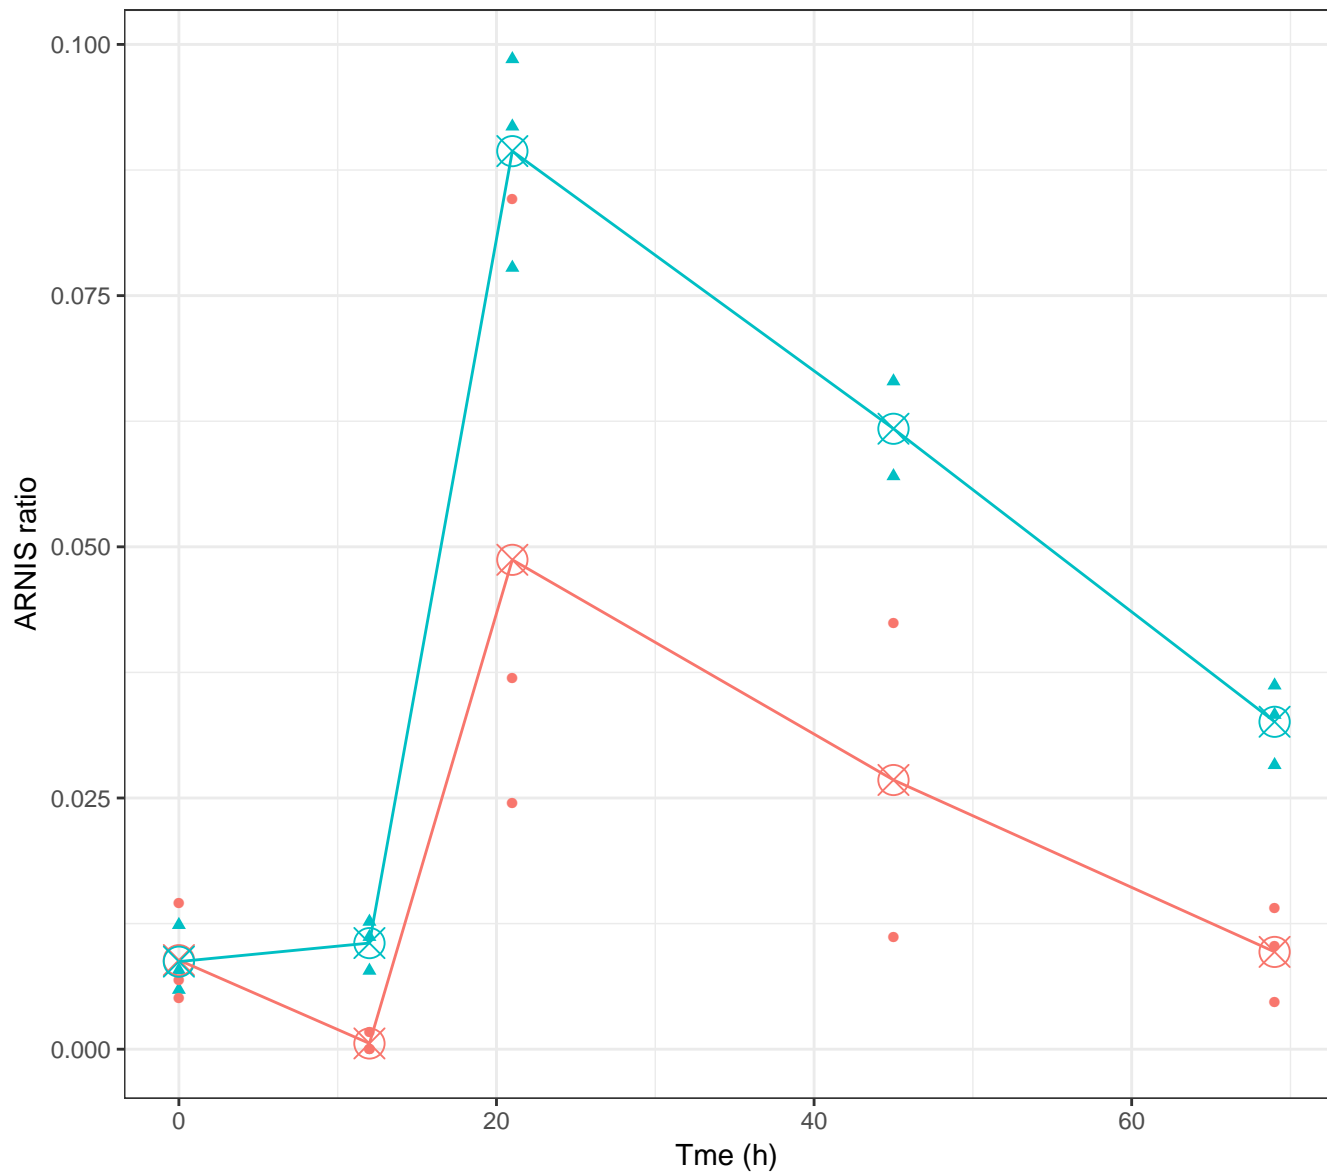

## OTU.487\_Betaproteobacteria\_Comamonadaceae

Treatment  Control  Filtered-1micron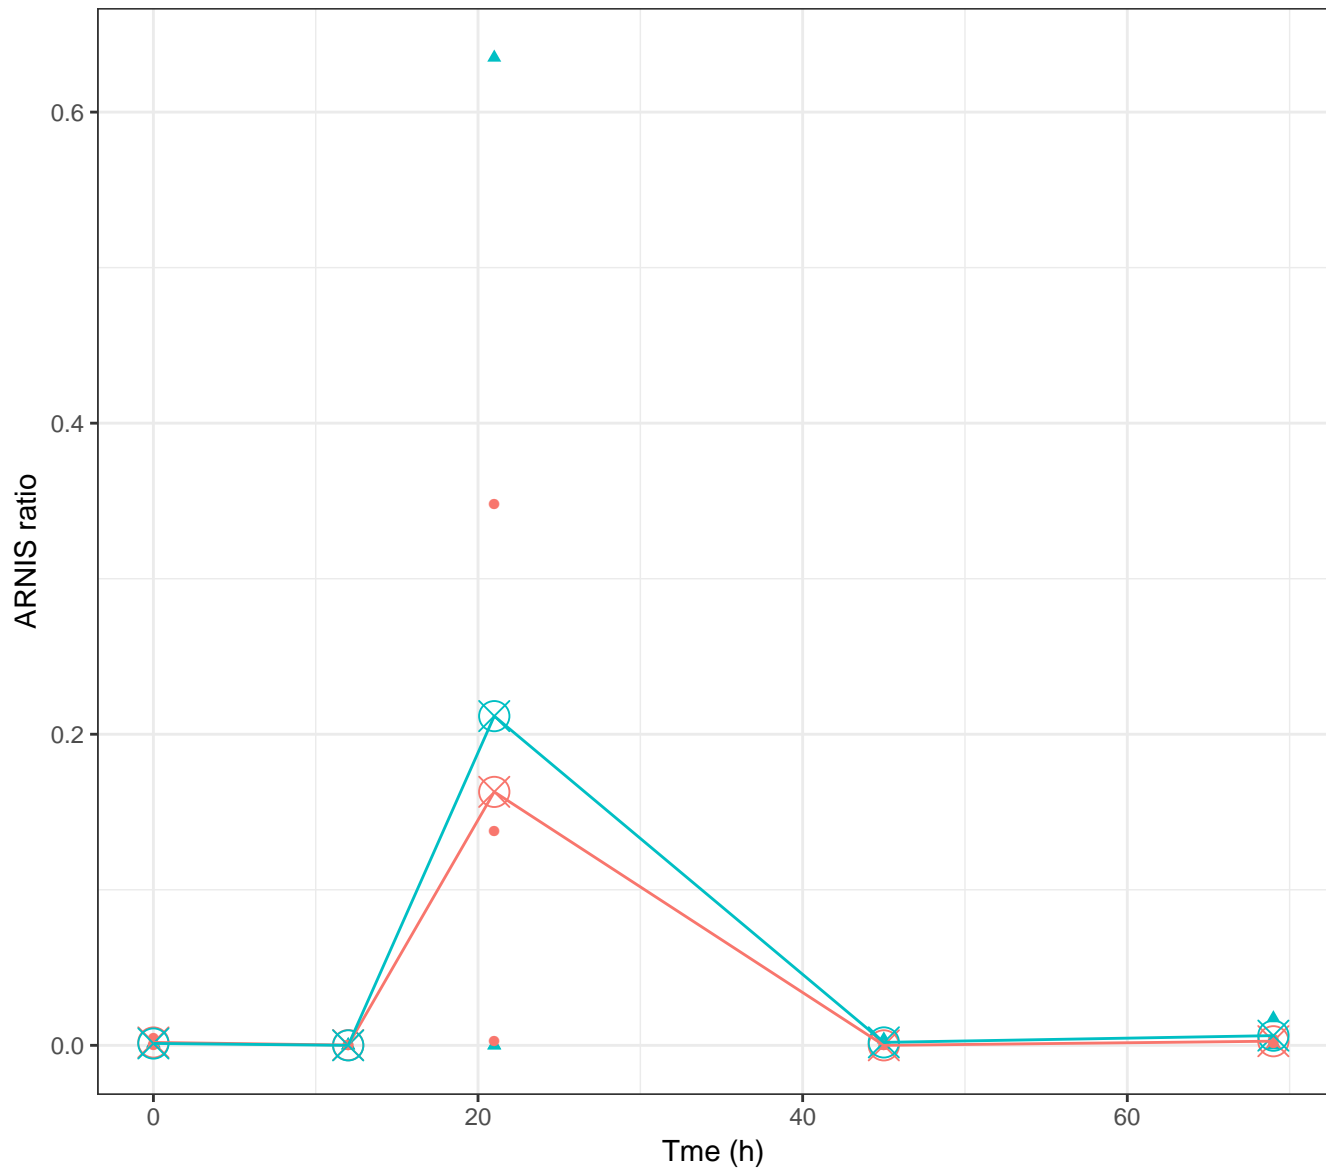

# OTU.6821\_Chloroflexi\_Roseiflexus

Treatment Control Filtered-1micron

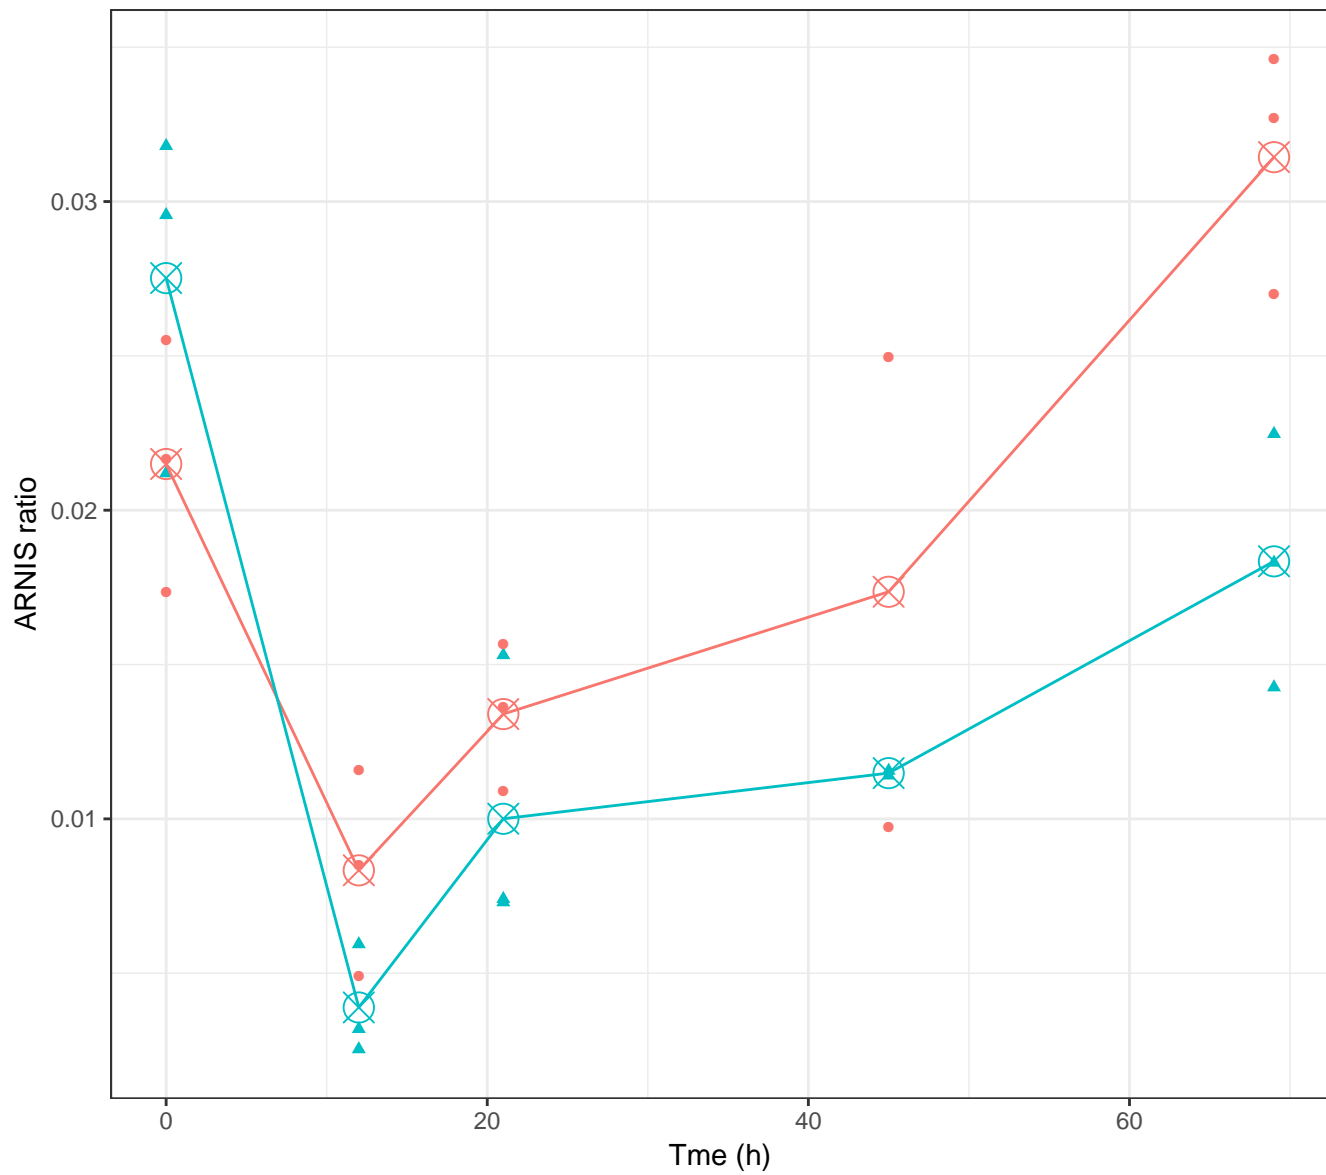

## OTU.517\_Bacteroidetes\_Pedobacter

Treatment Control Filtered-1micron

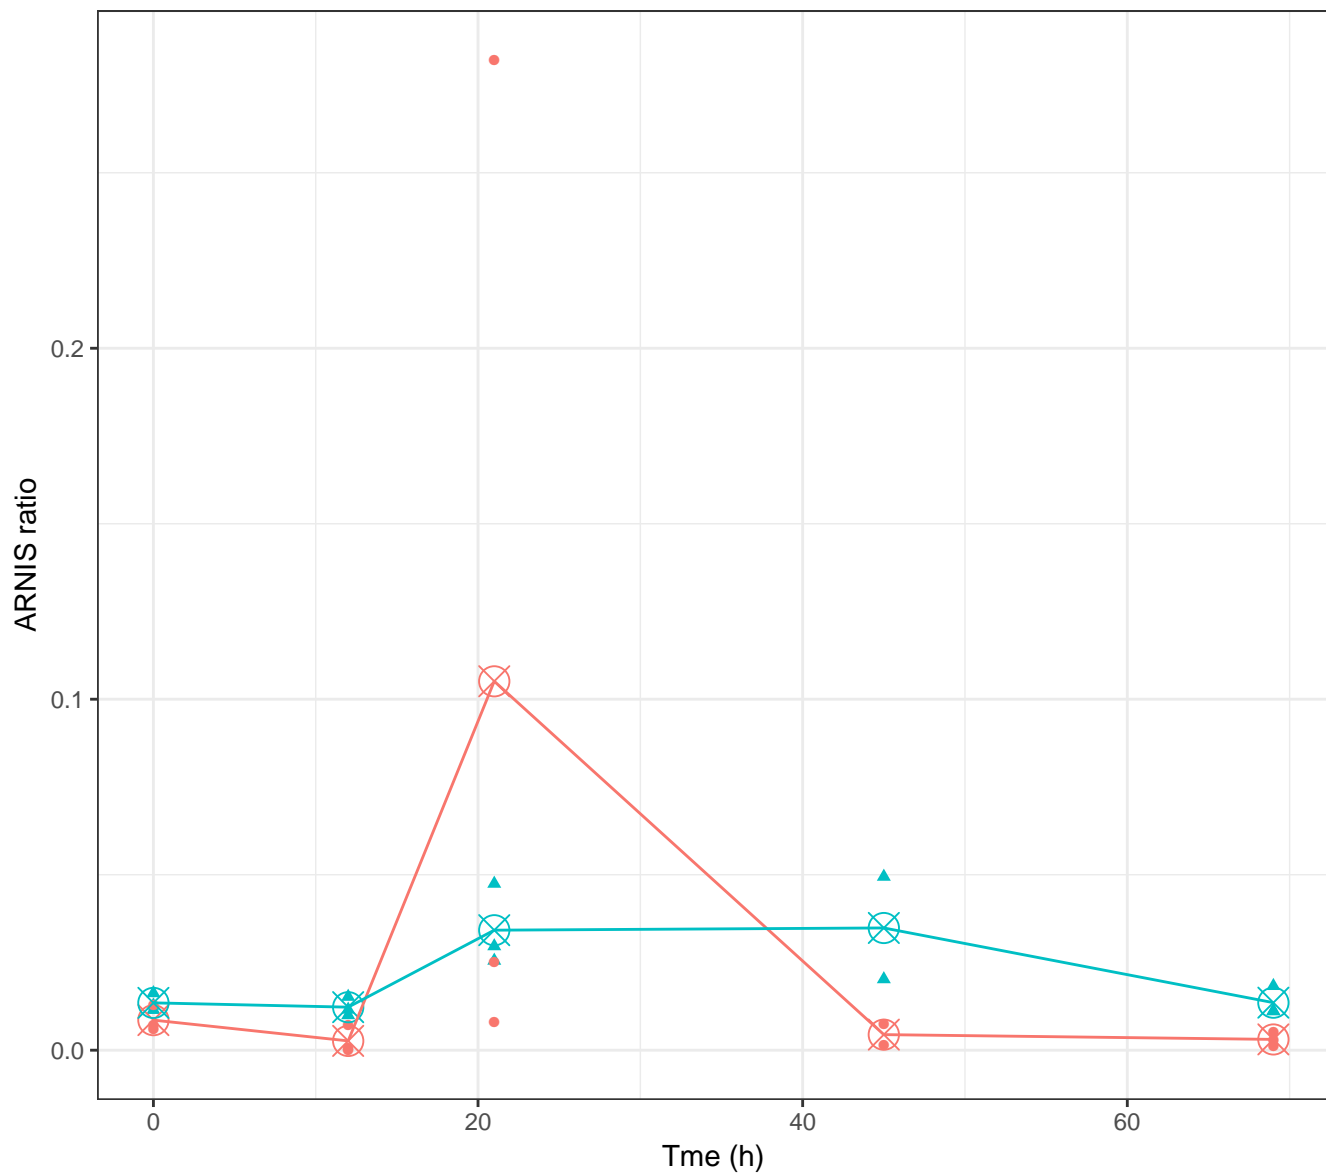



# OTU.294\_Alphaproteobacteria\_Caulobacter

Treatment Control Filtered-1micron

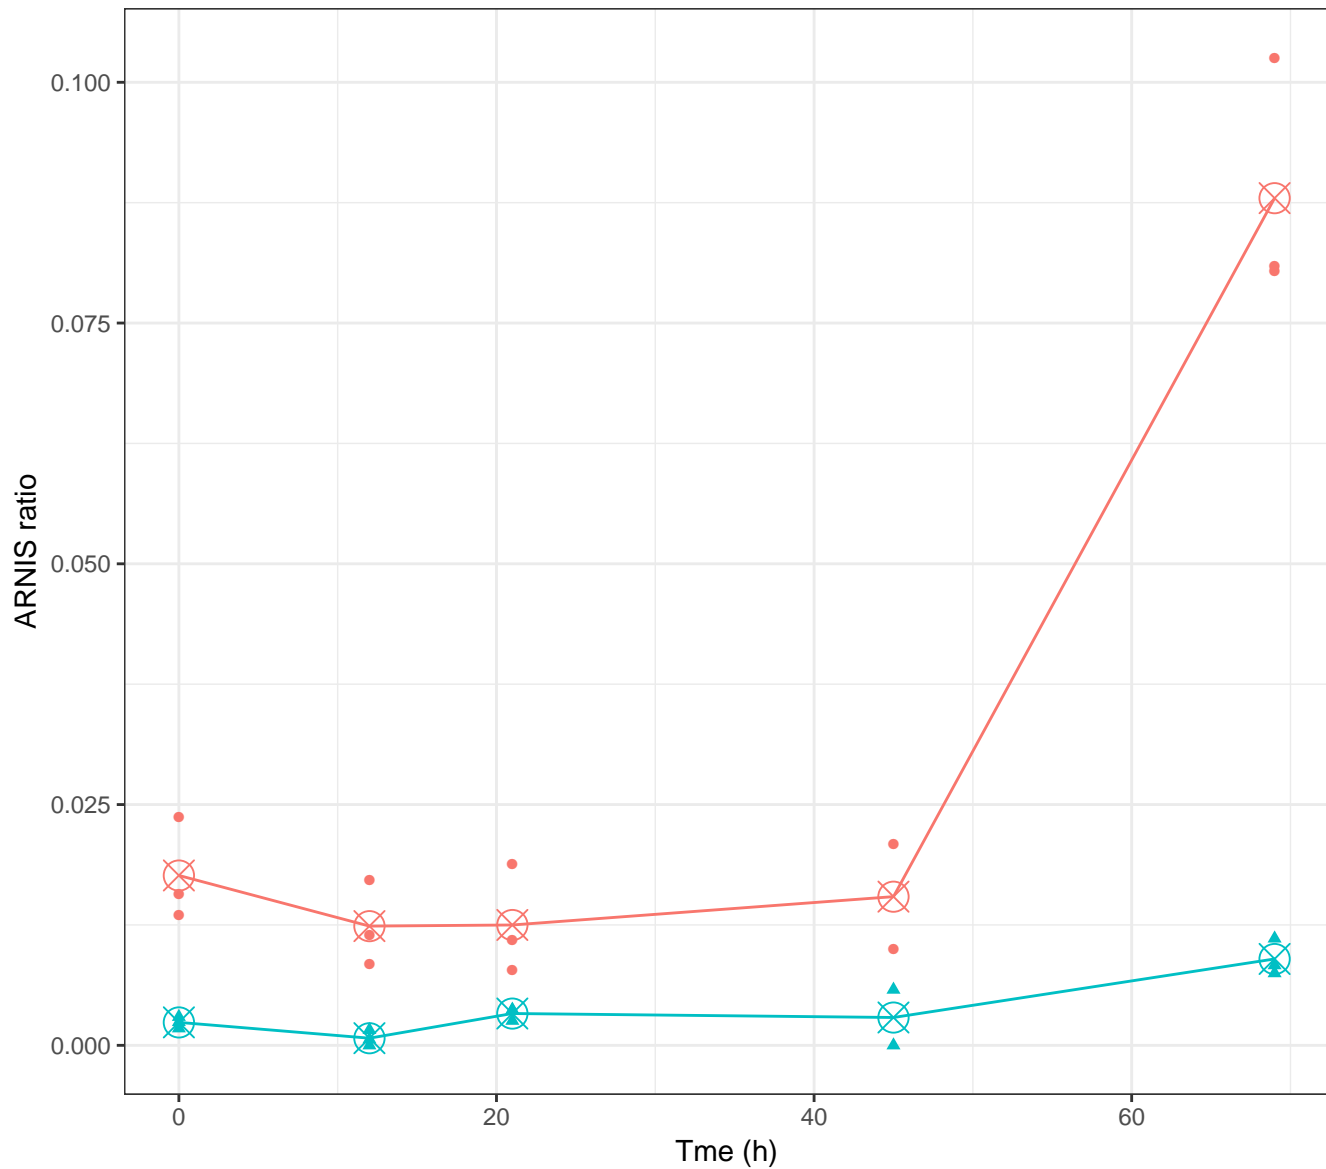

# OTU.137\_Bacteroidetes\_NS11.12\_marine\_group

Treatment ⊗ Control ⊗ Filtered-1micron

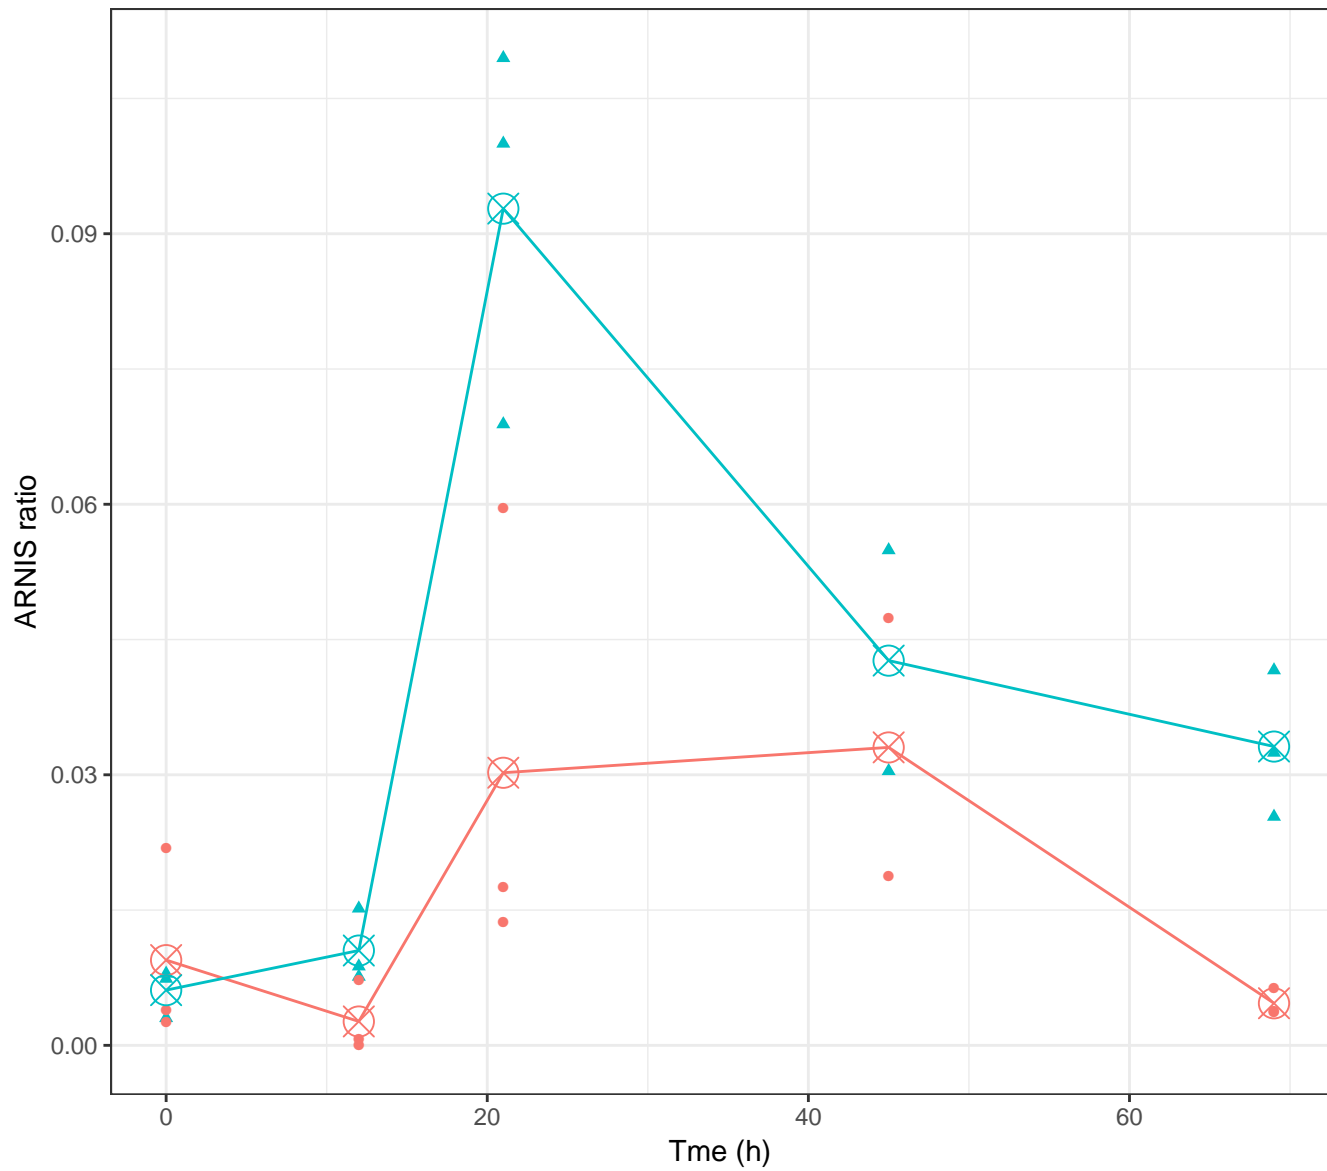

## OTU.298\_Gammaproteobacteria\_Acinetobacter

Treatment Control Filtered-1micron

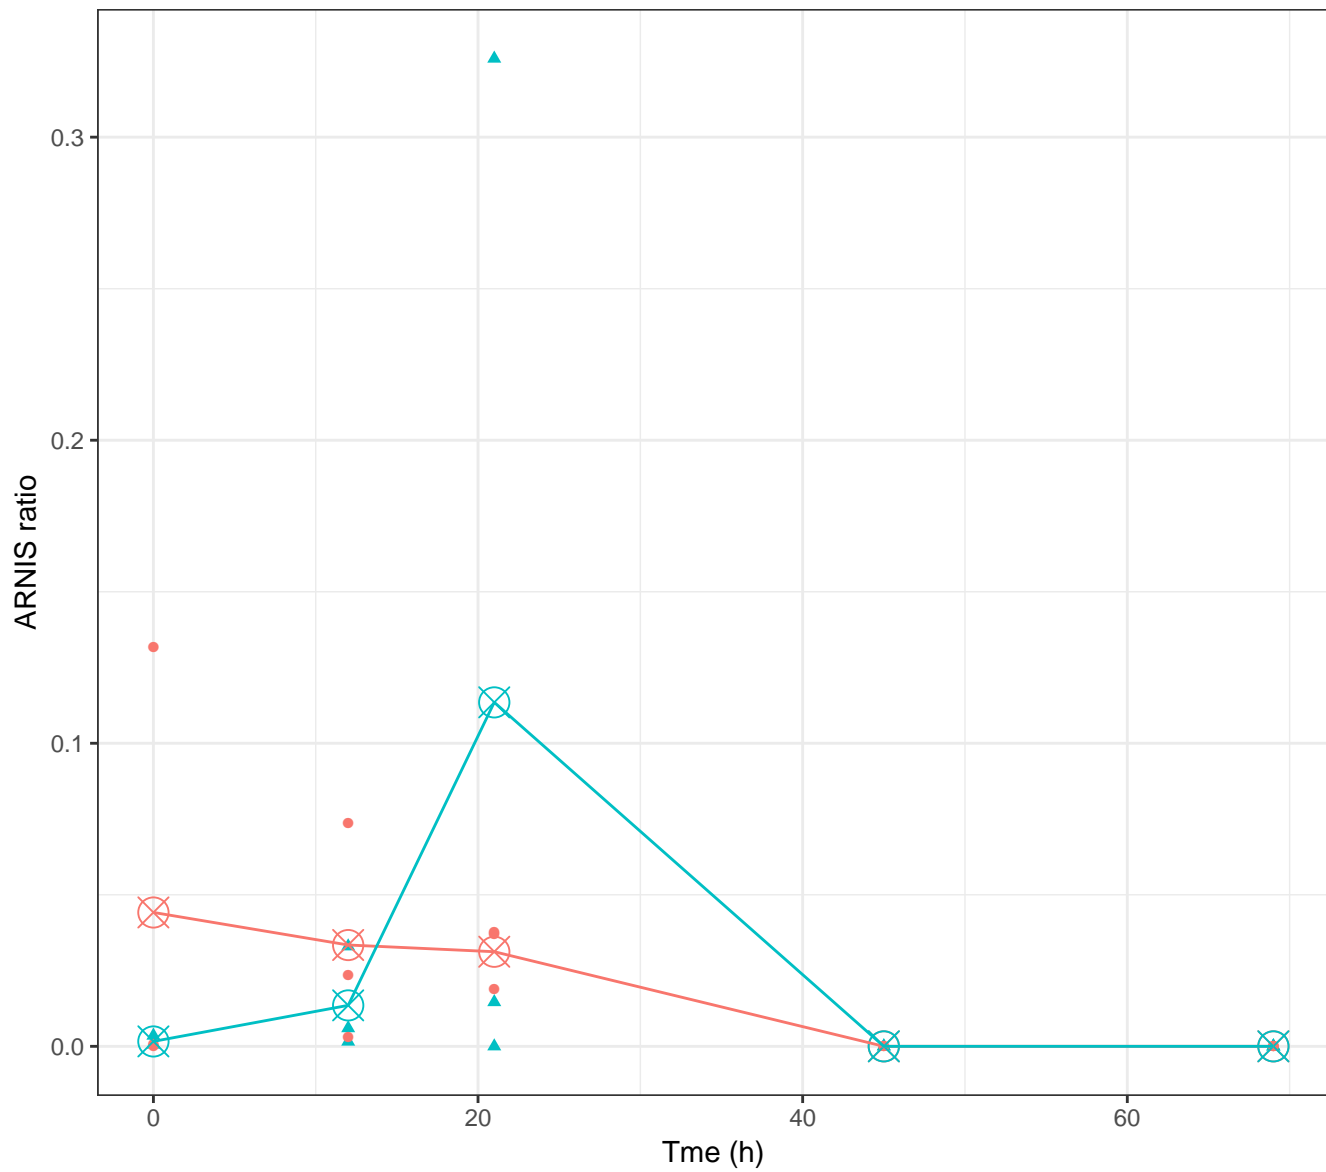

# OTU.292\_Bacteroidetes\_Cytophagaceae

Treatment ⊗ Control ⊗ Filtered-1micron

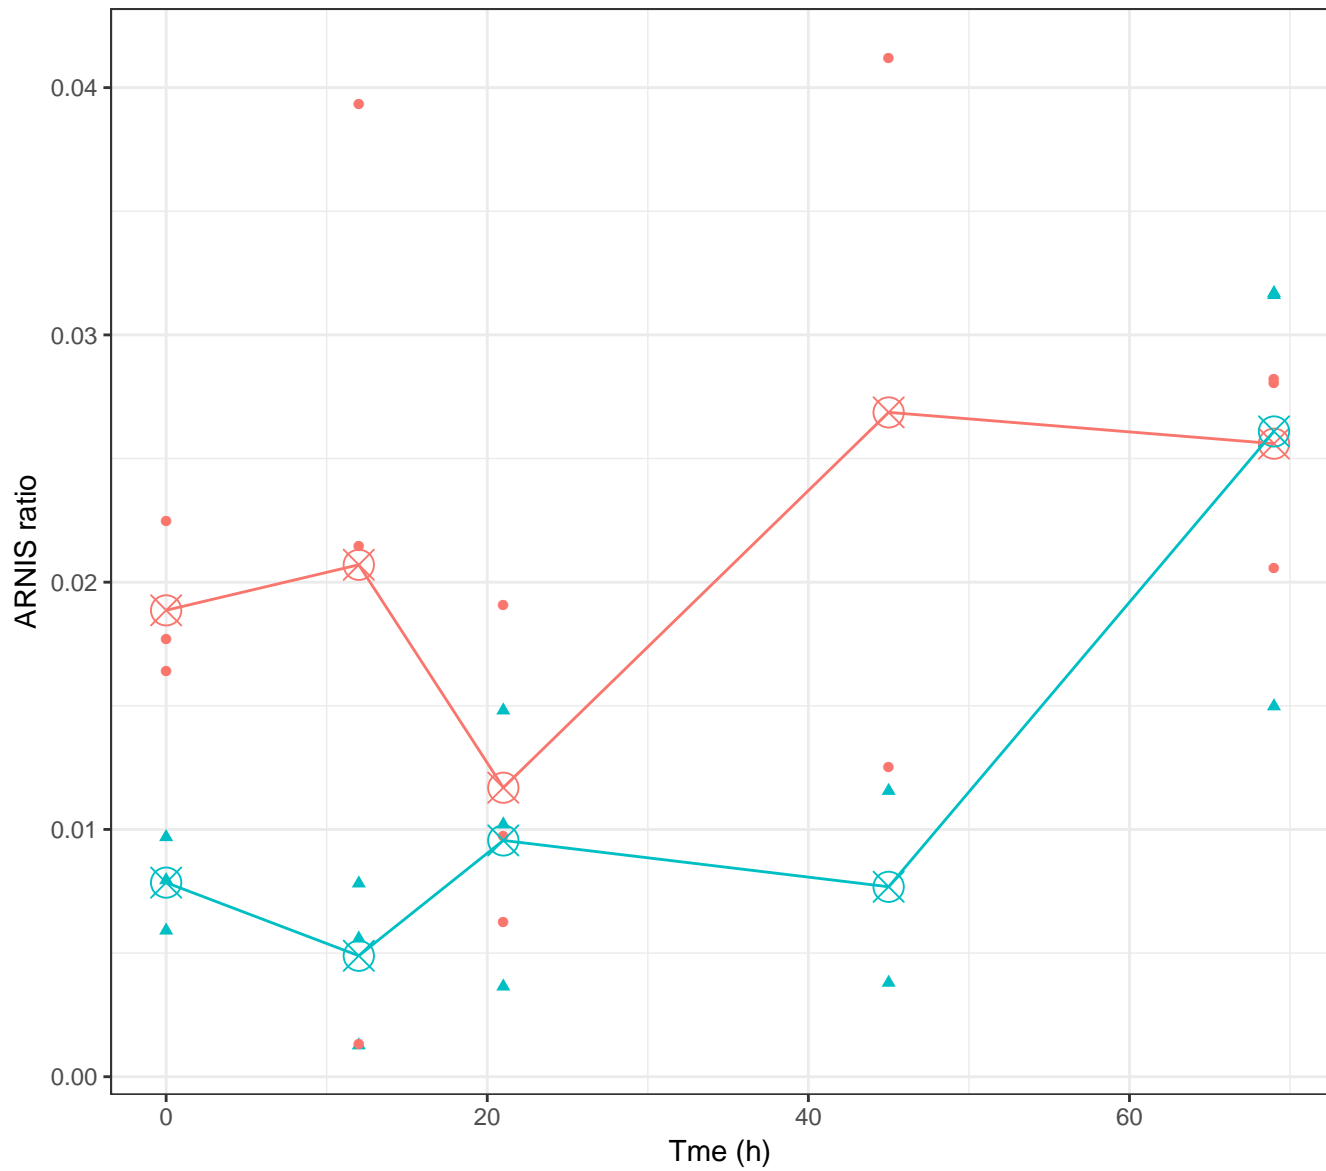

# OTU.33\_Bacteroidetes\_Fluviicola

Treatment Control Filtered-1micron

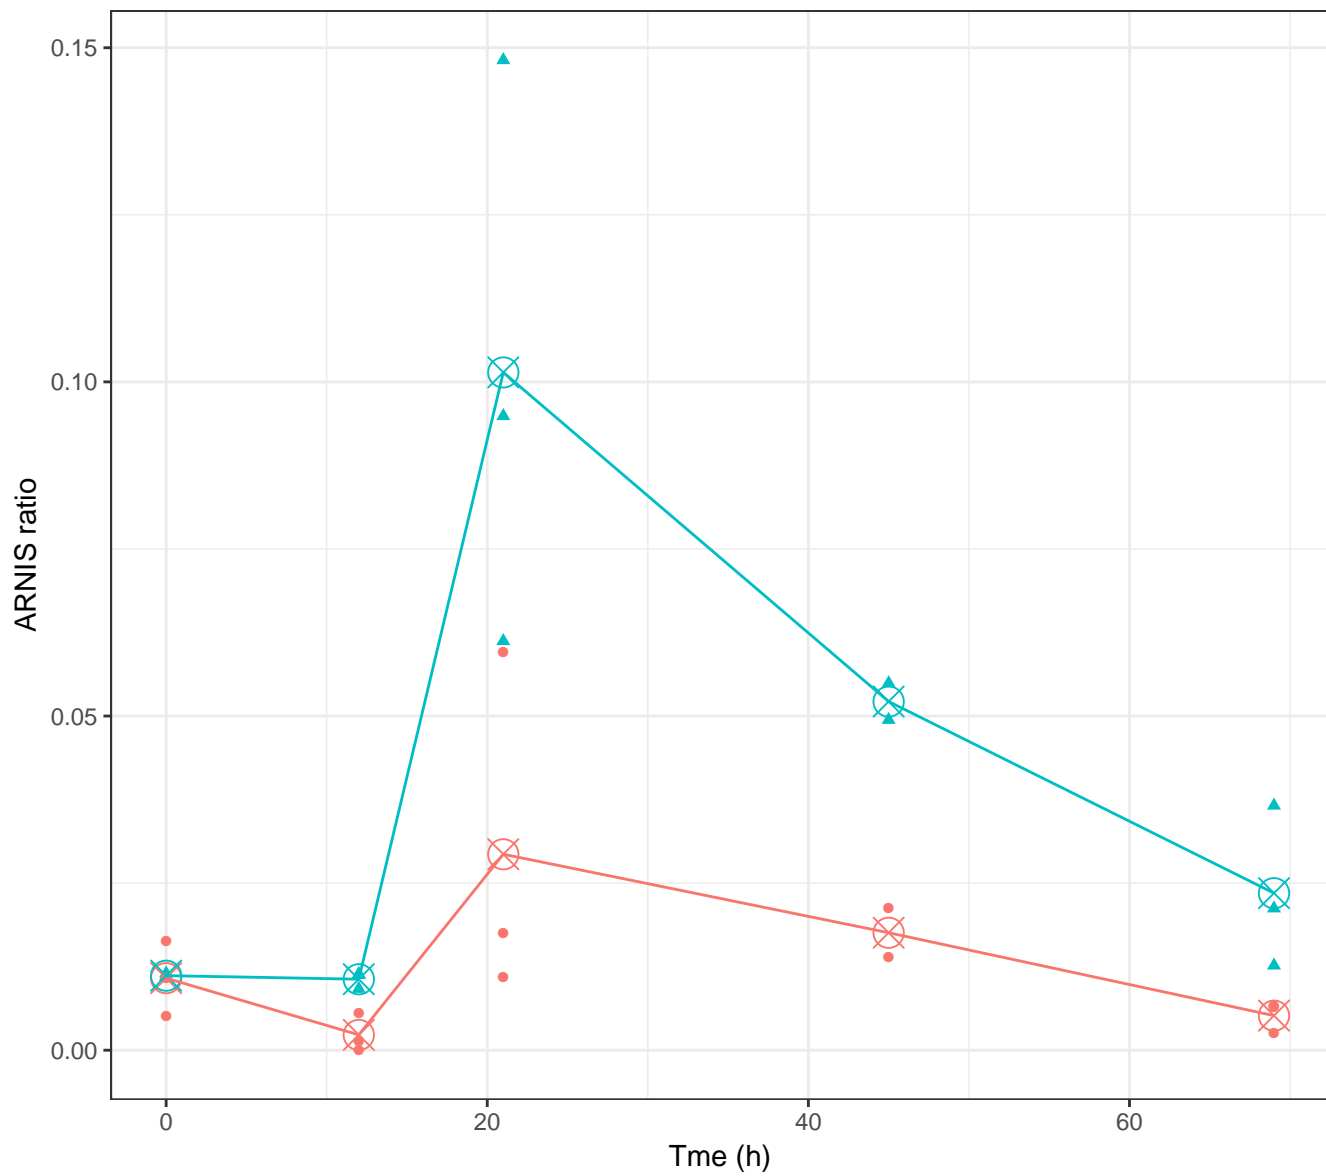

# OTU.34\_Bacteroidetes\_Sphingobacteriales

Treatment Control Filtered-1micron

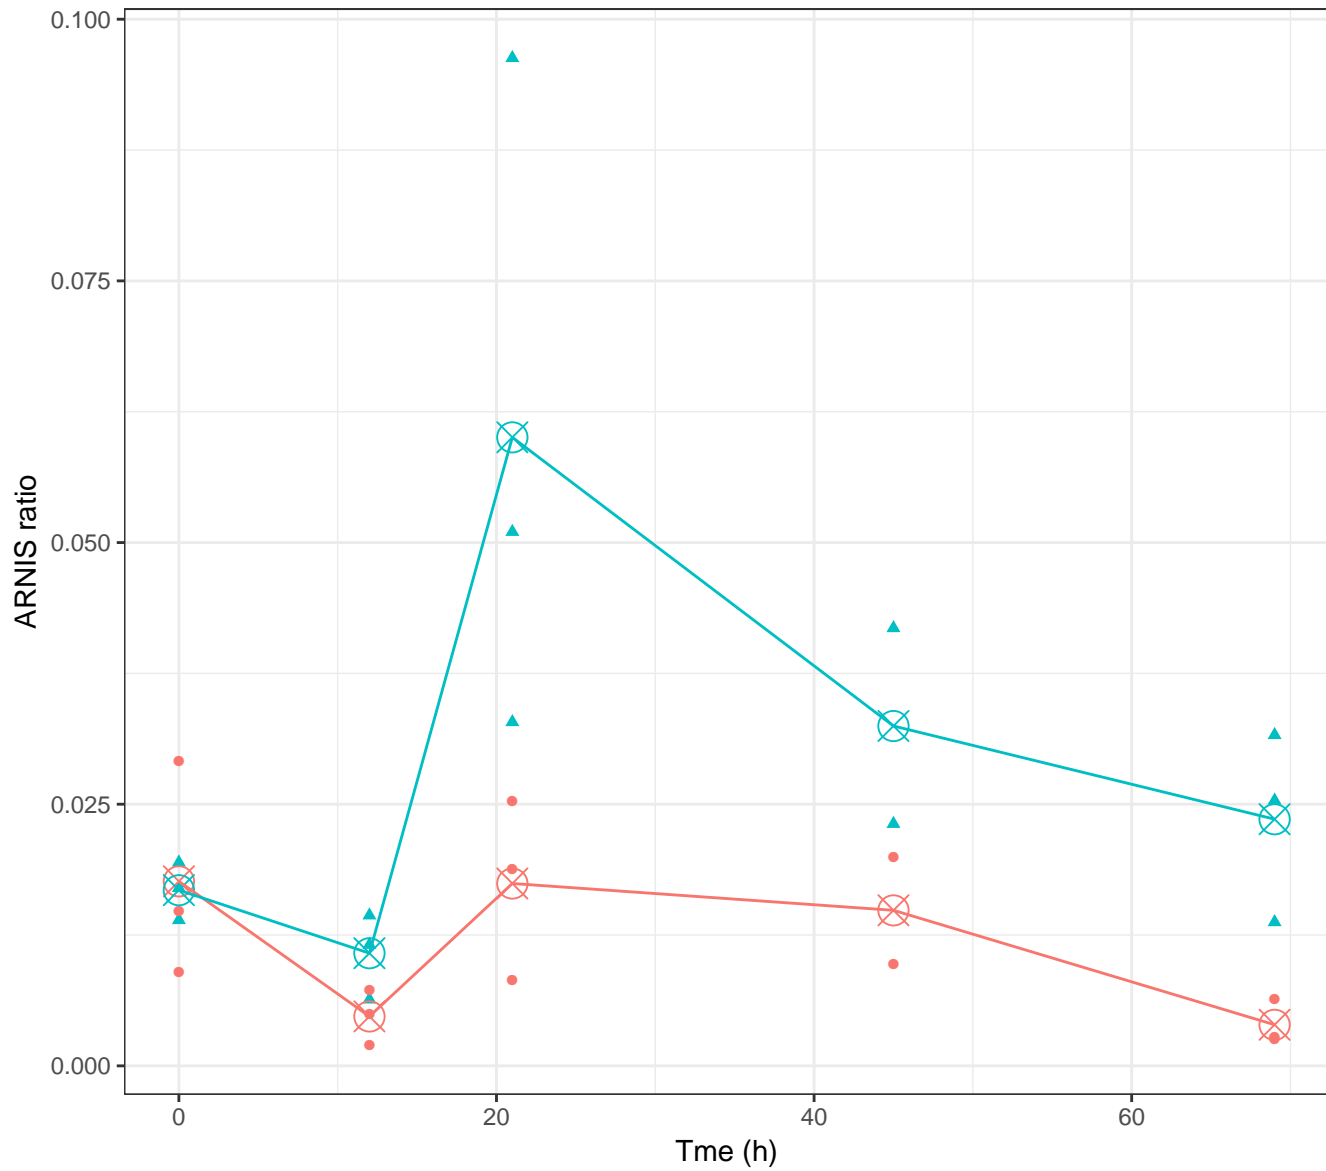

# OTU.302\_Betaproteobacteria\_Lautropia

Treatment Control Filtered-1micron

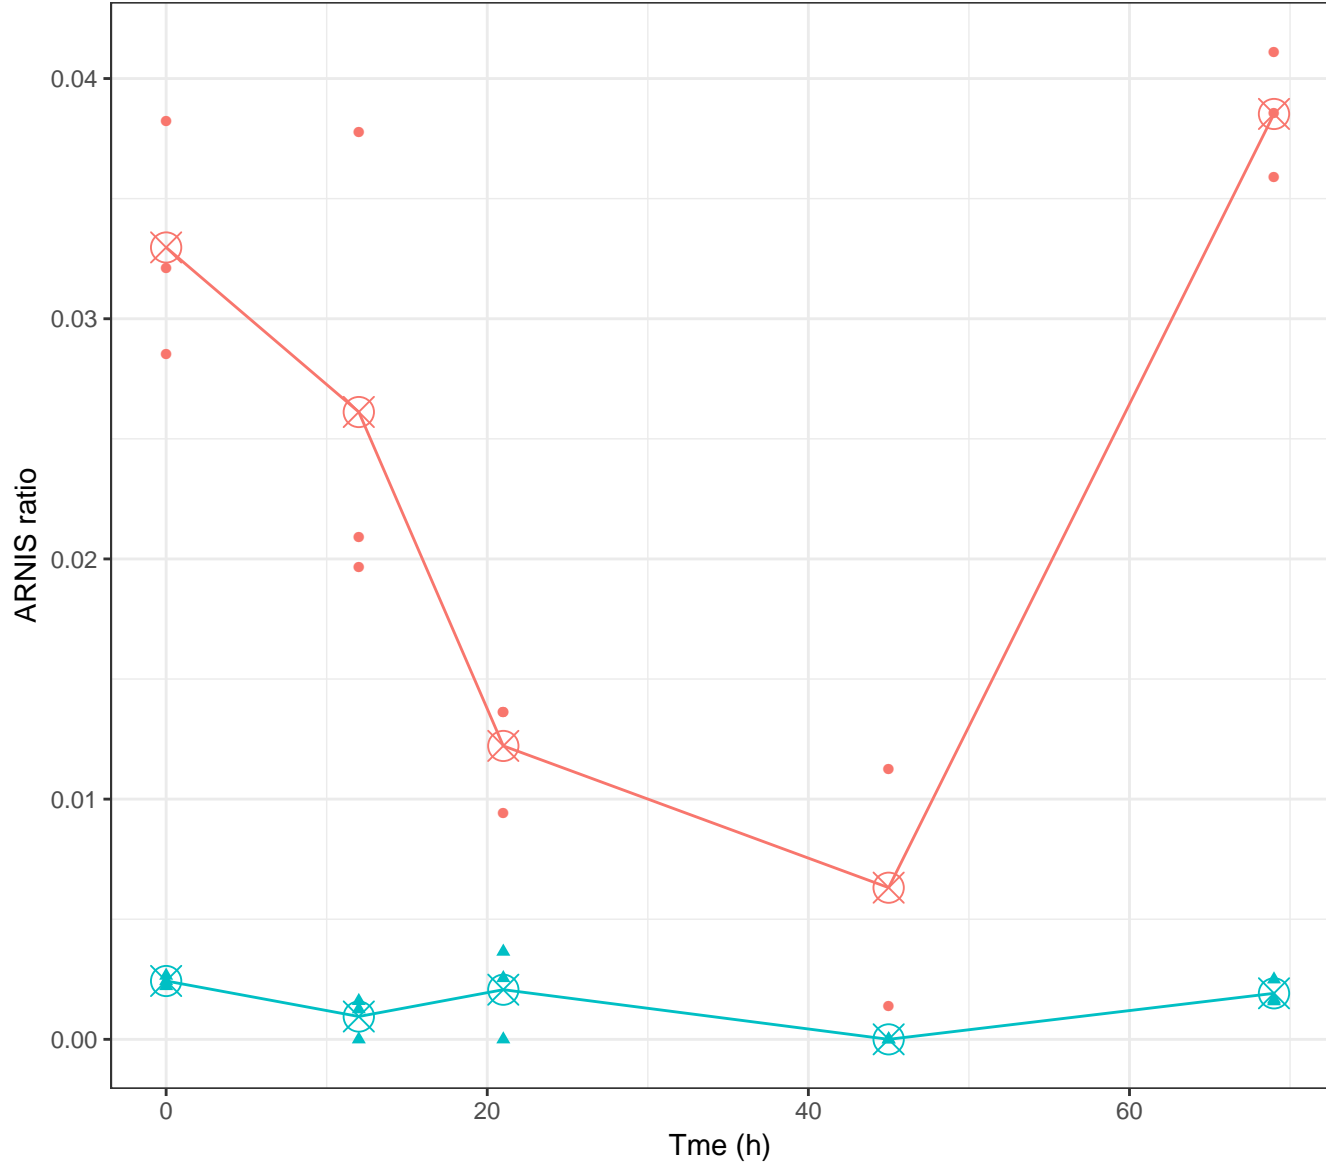

# OTU.556\_Actinobacteria\_Candidatus\_Planktophila

Treatment  Control  Filtered-1micron

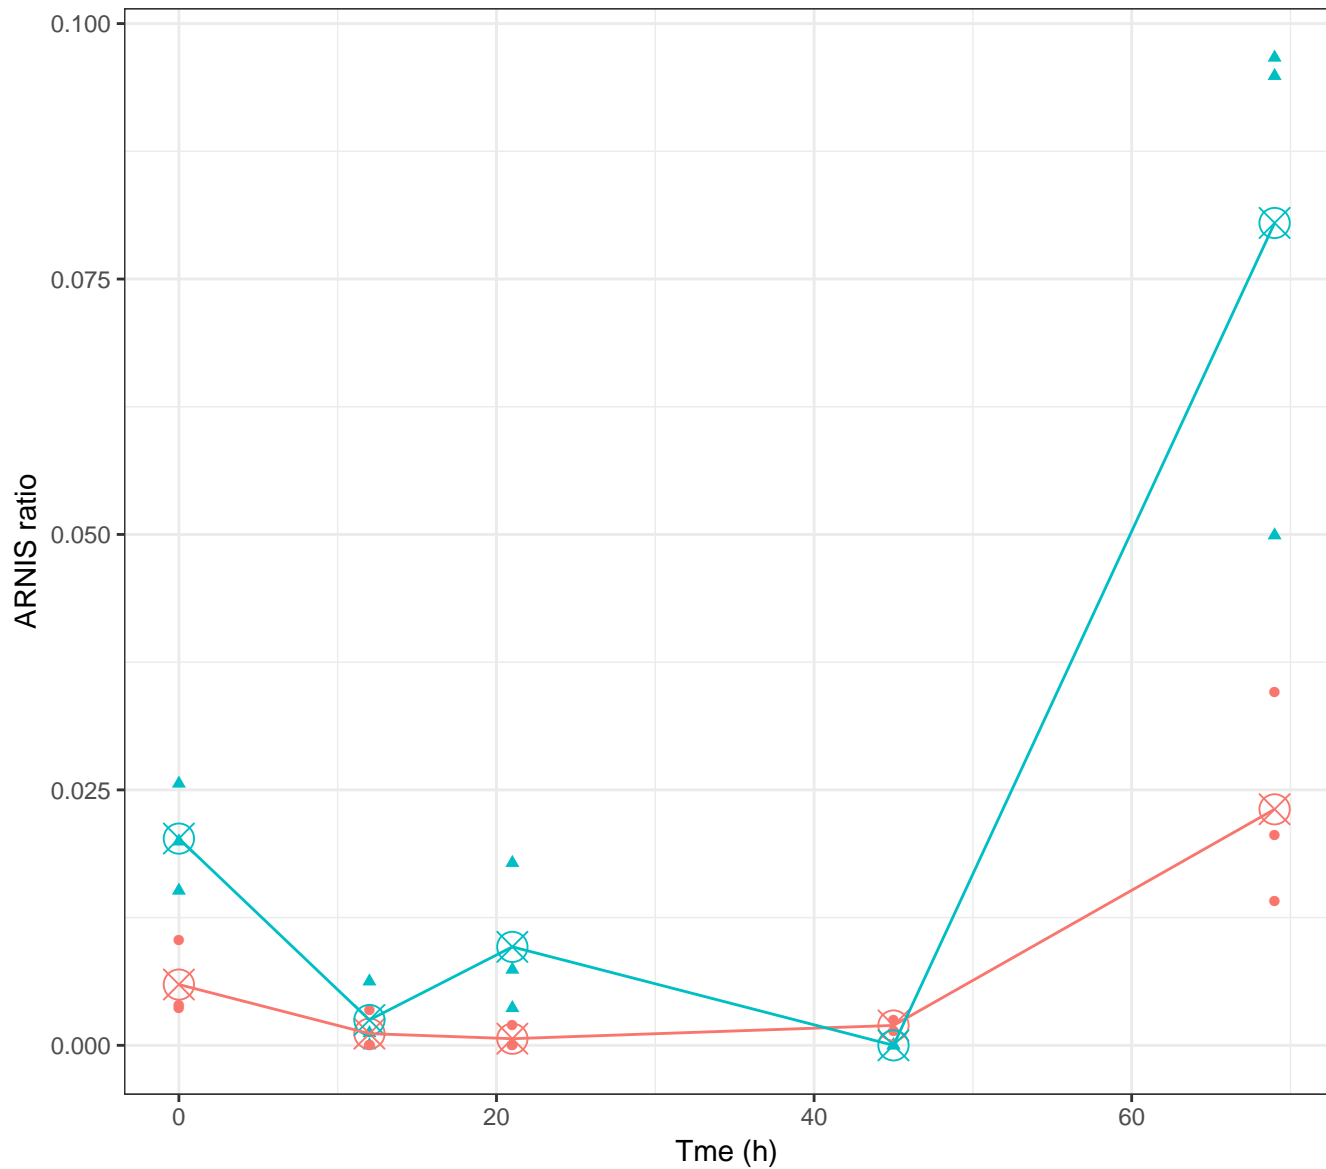



# OTU.303\_Deltaproteobacteria\_Peridibacter

Treatment Control Filtered-1micron

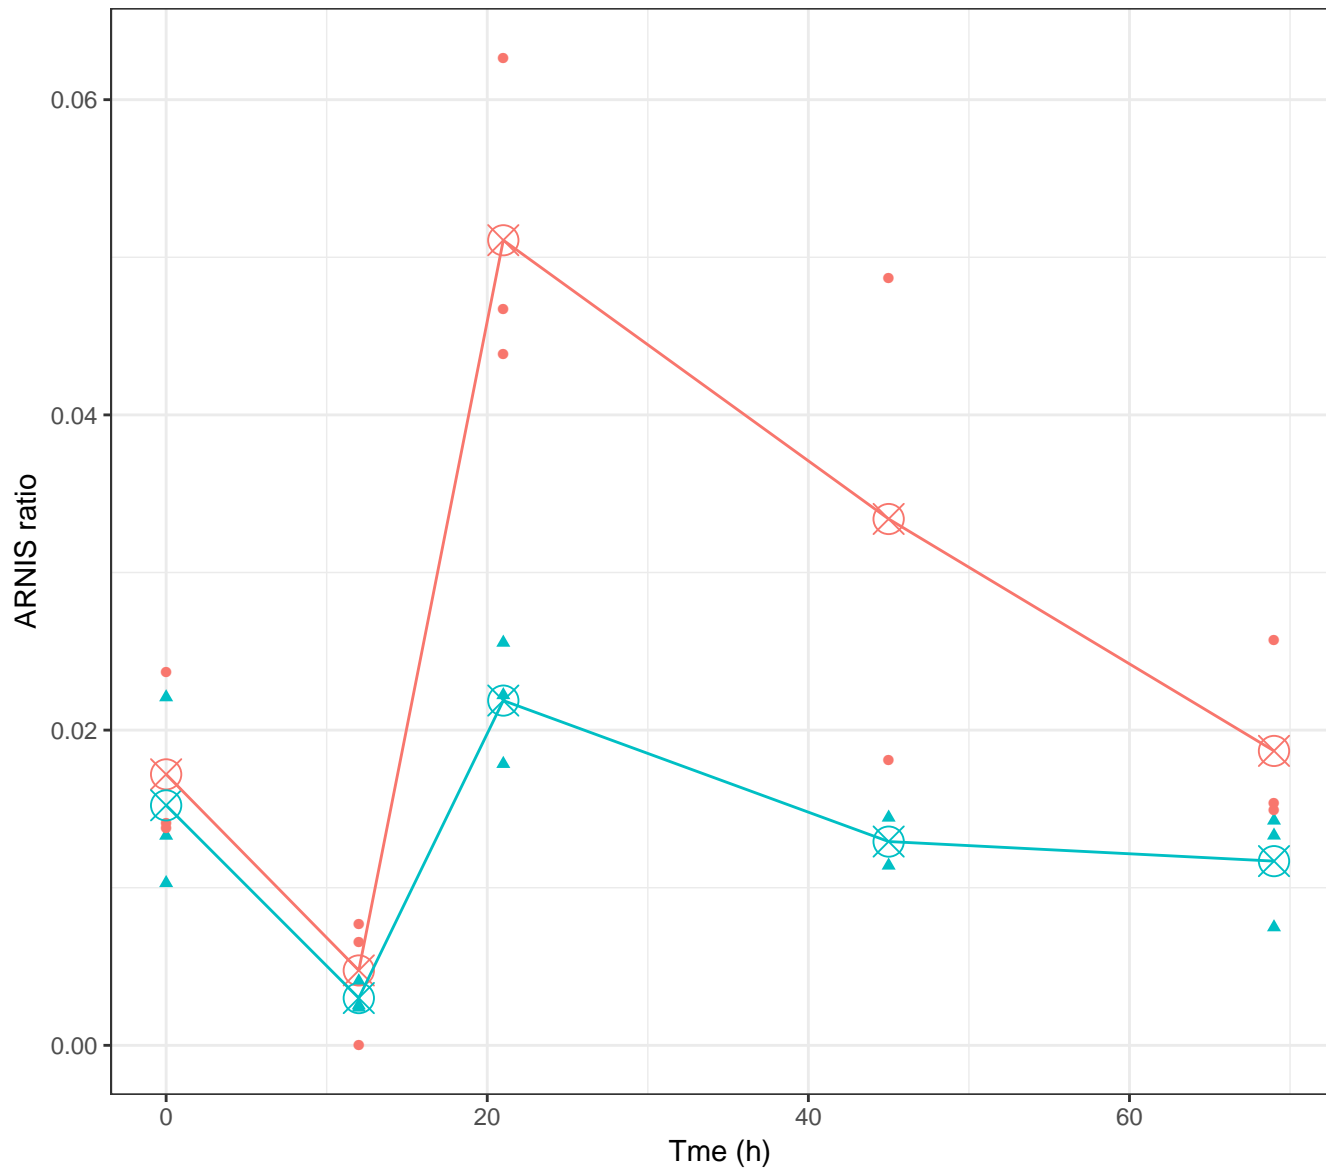

## OTU.371\_Gammaproteobacteria\_Silanimonas

Treatment Control Filtered-1micron

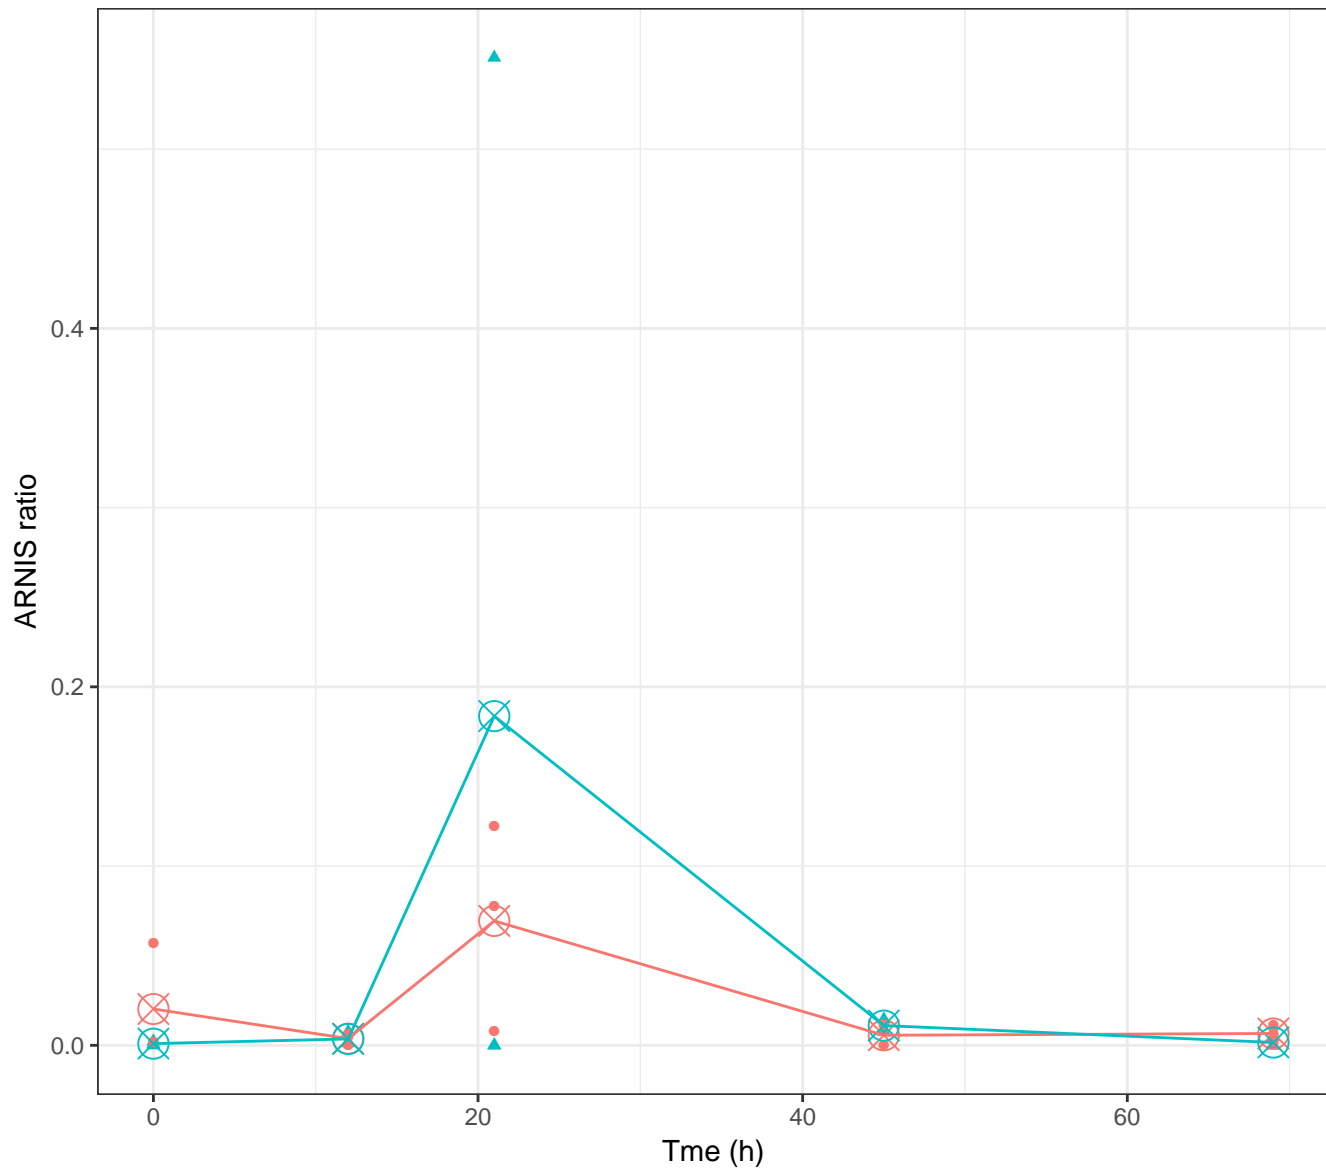

## OTU.507\_Actinobacteria\_clade\_acl.A1

Treatment  Control  Filtered-1micron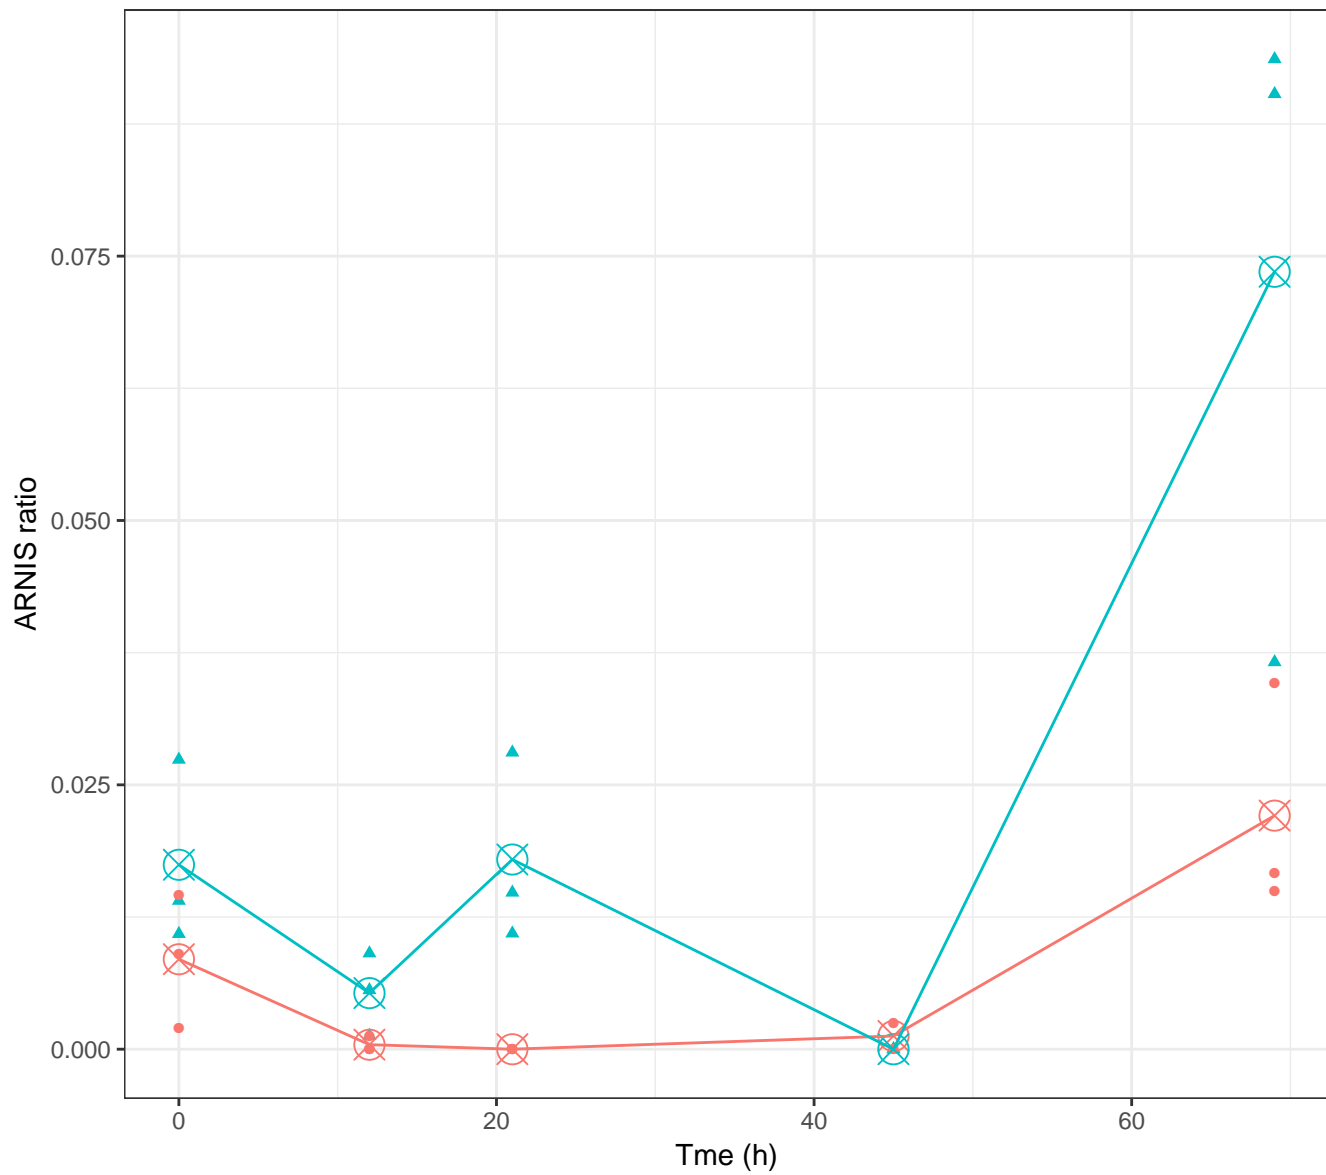

# OTU.76\_Bacteroidetes\_Flavobacterium

Treatment Control Filtered-1micron

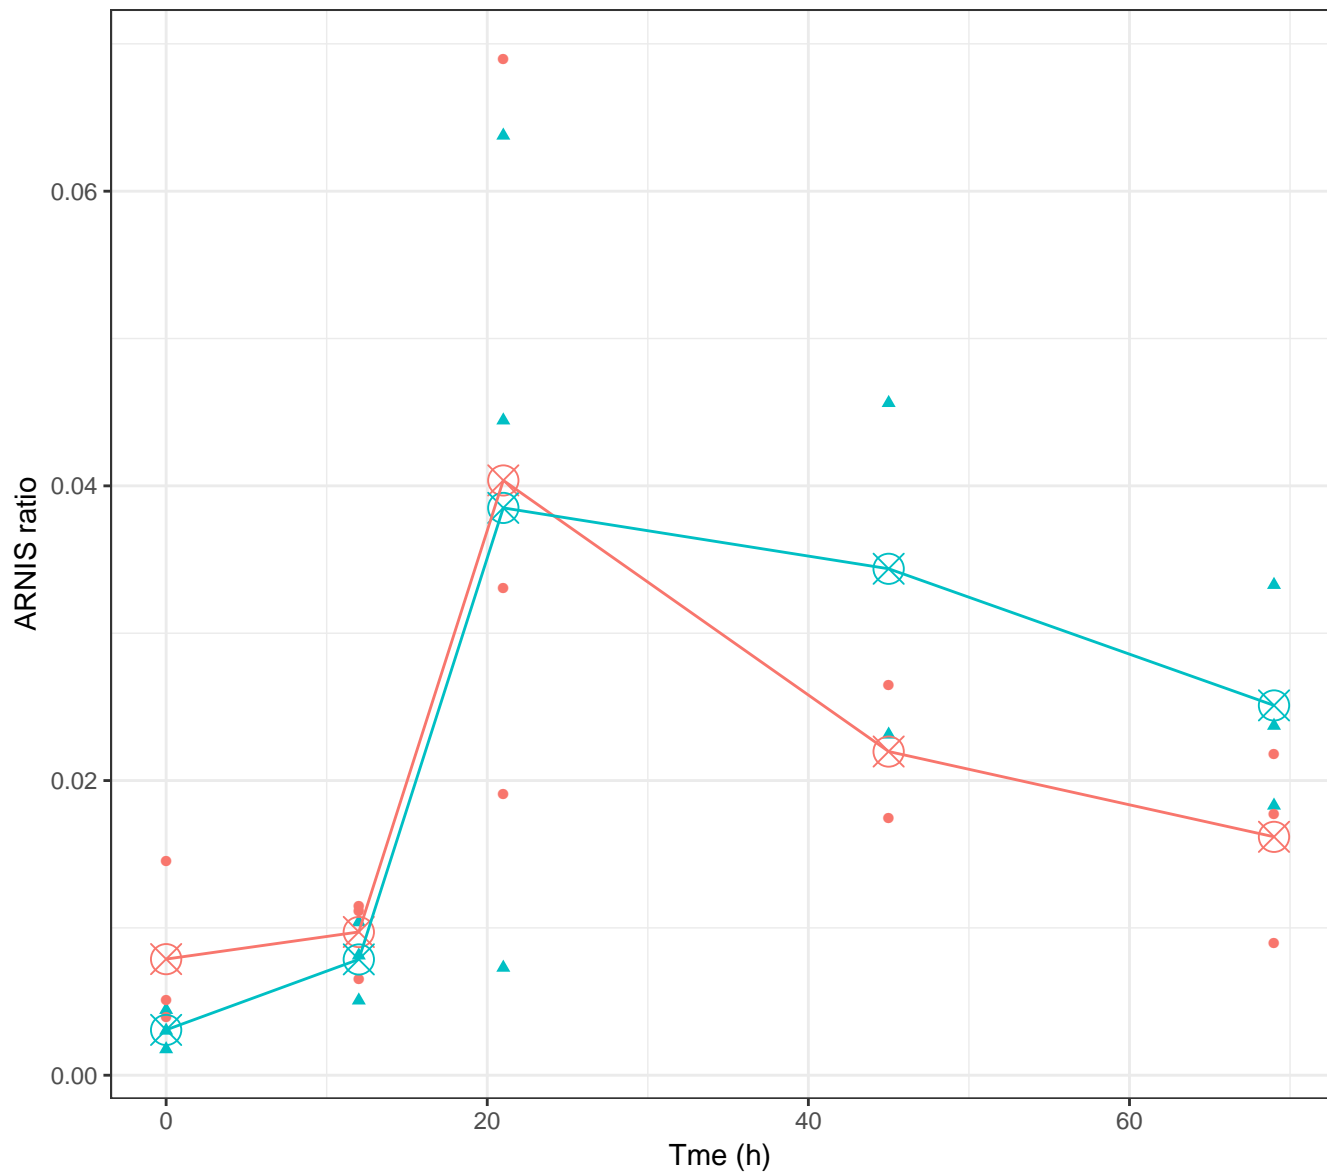

# OTU.317\_Bacteroidetes\_PHOS.HE51

Treatment Control Filtered-1micron

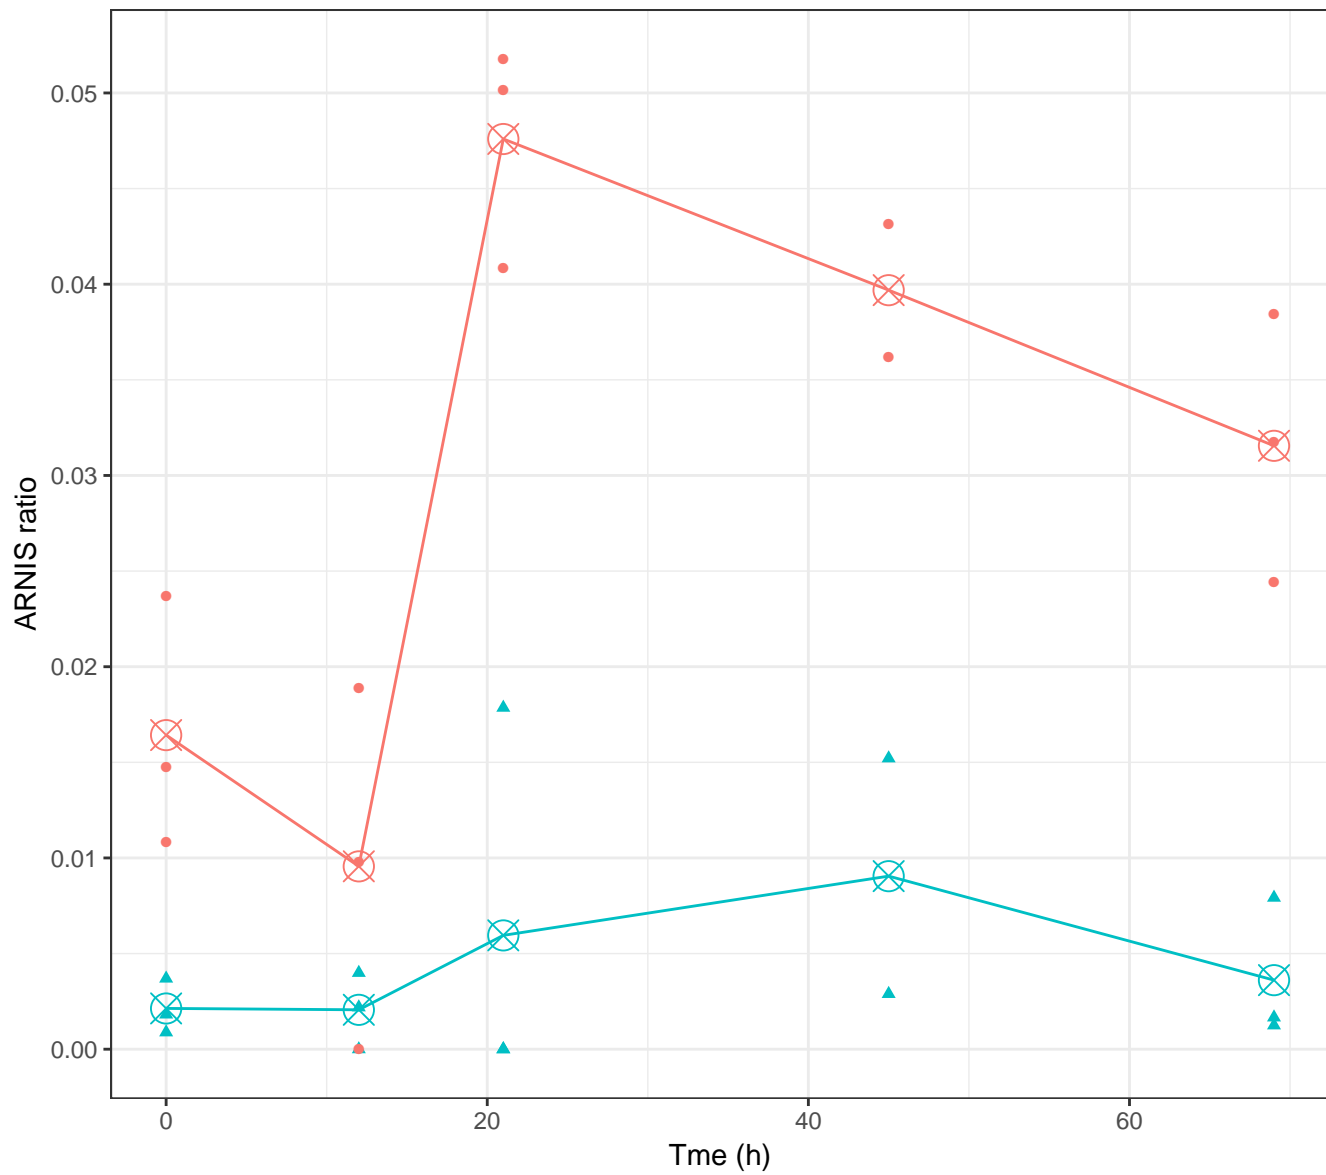

# OTU.52\_Actinobacteria\_clade\_acl.C1

Treatment Control Filtered-1micron

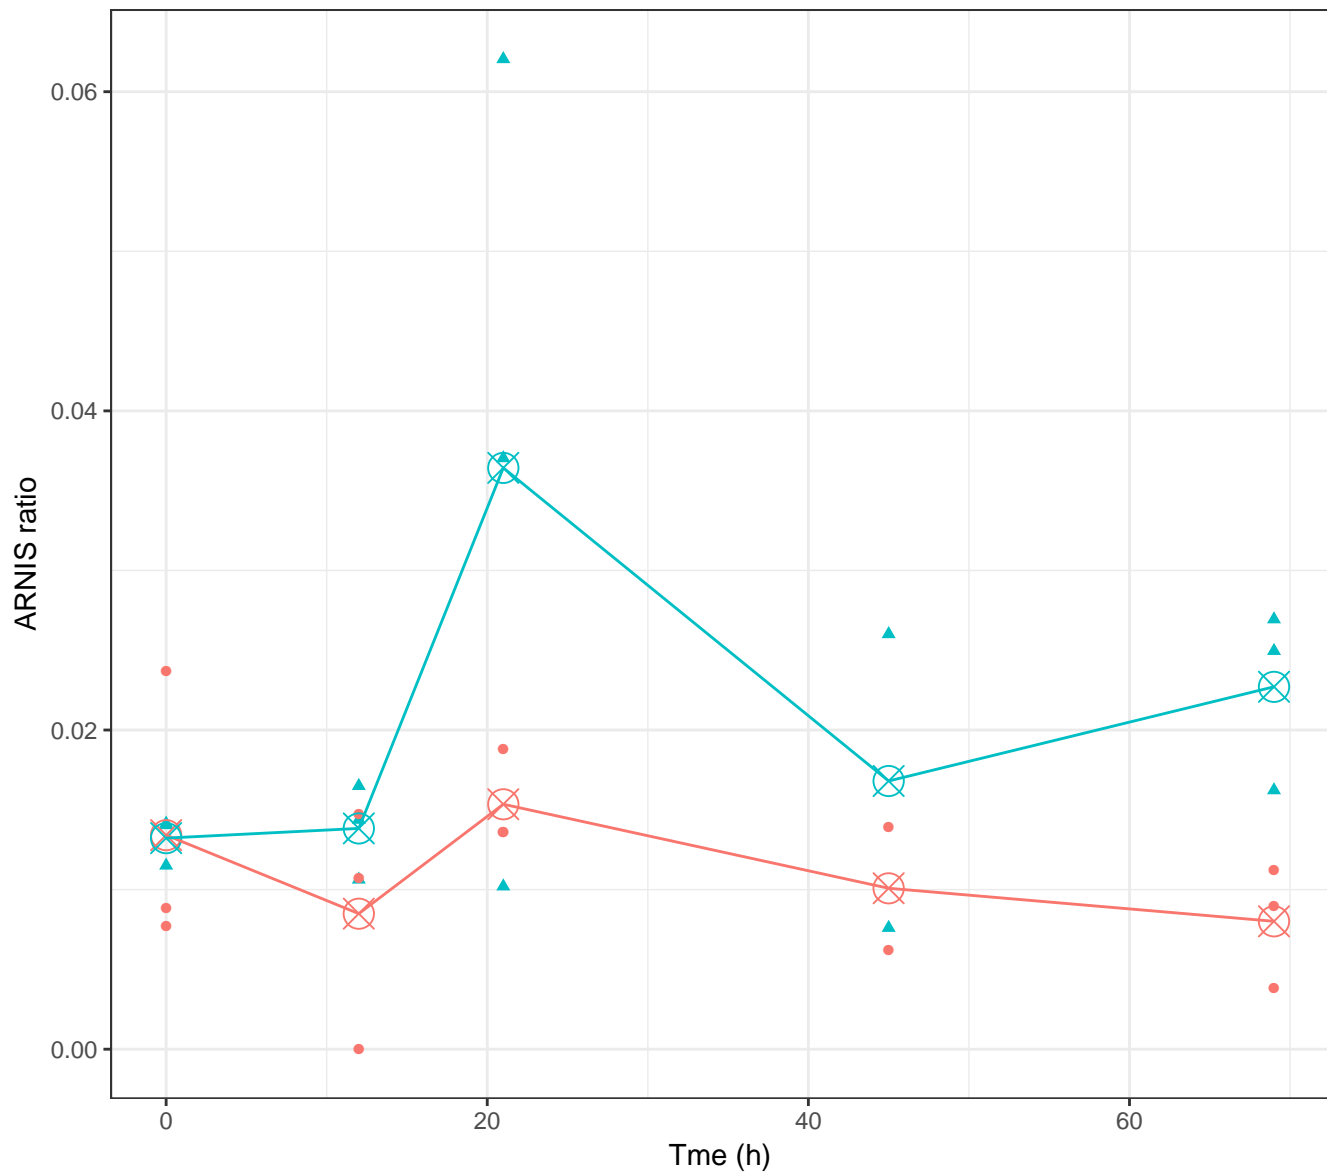

# OTU.32\_Actinobacteria\_Illumatobacter

Treatment Control Filtered-1micron

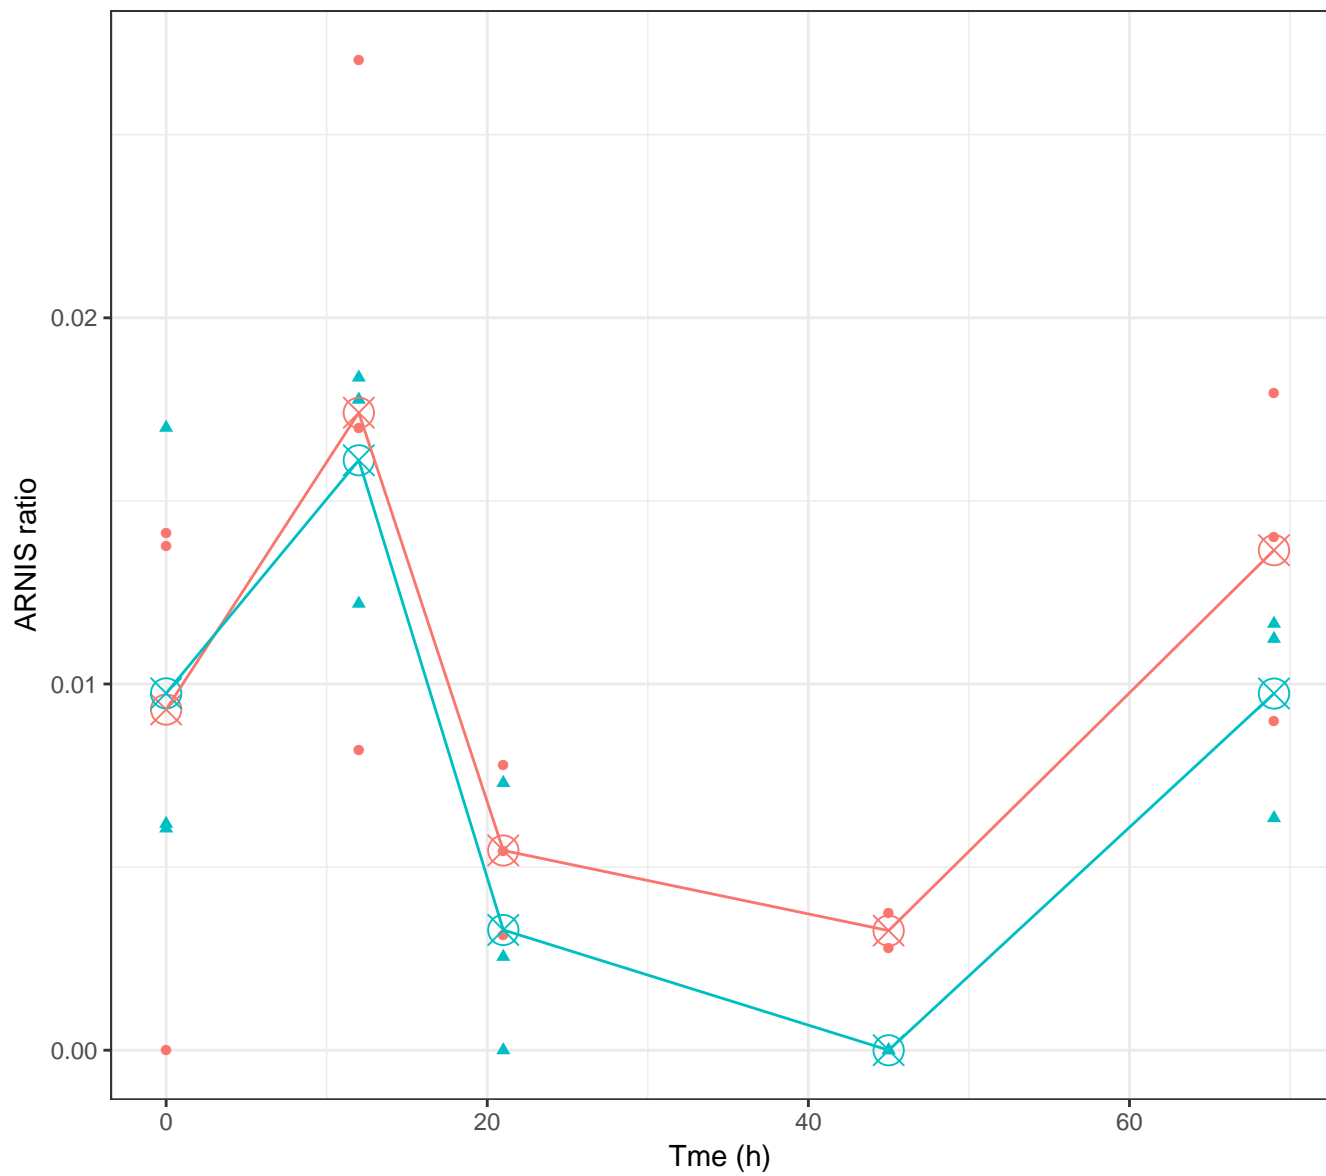

# OTU.606\_Betaproteobacteria\_Sulfuritalea

Treatment  Control  Filtered-1micron

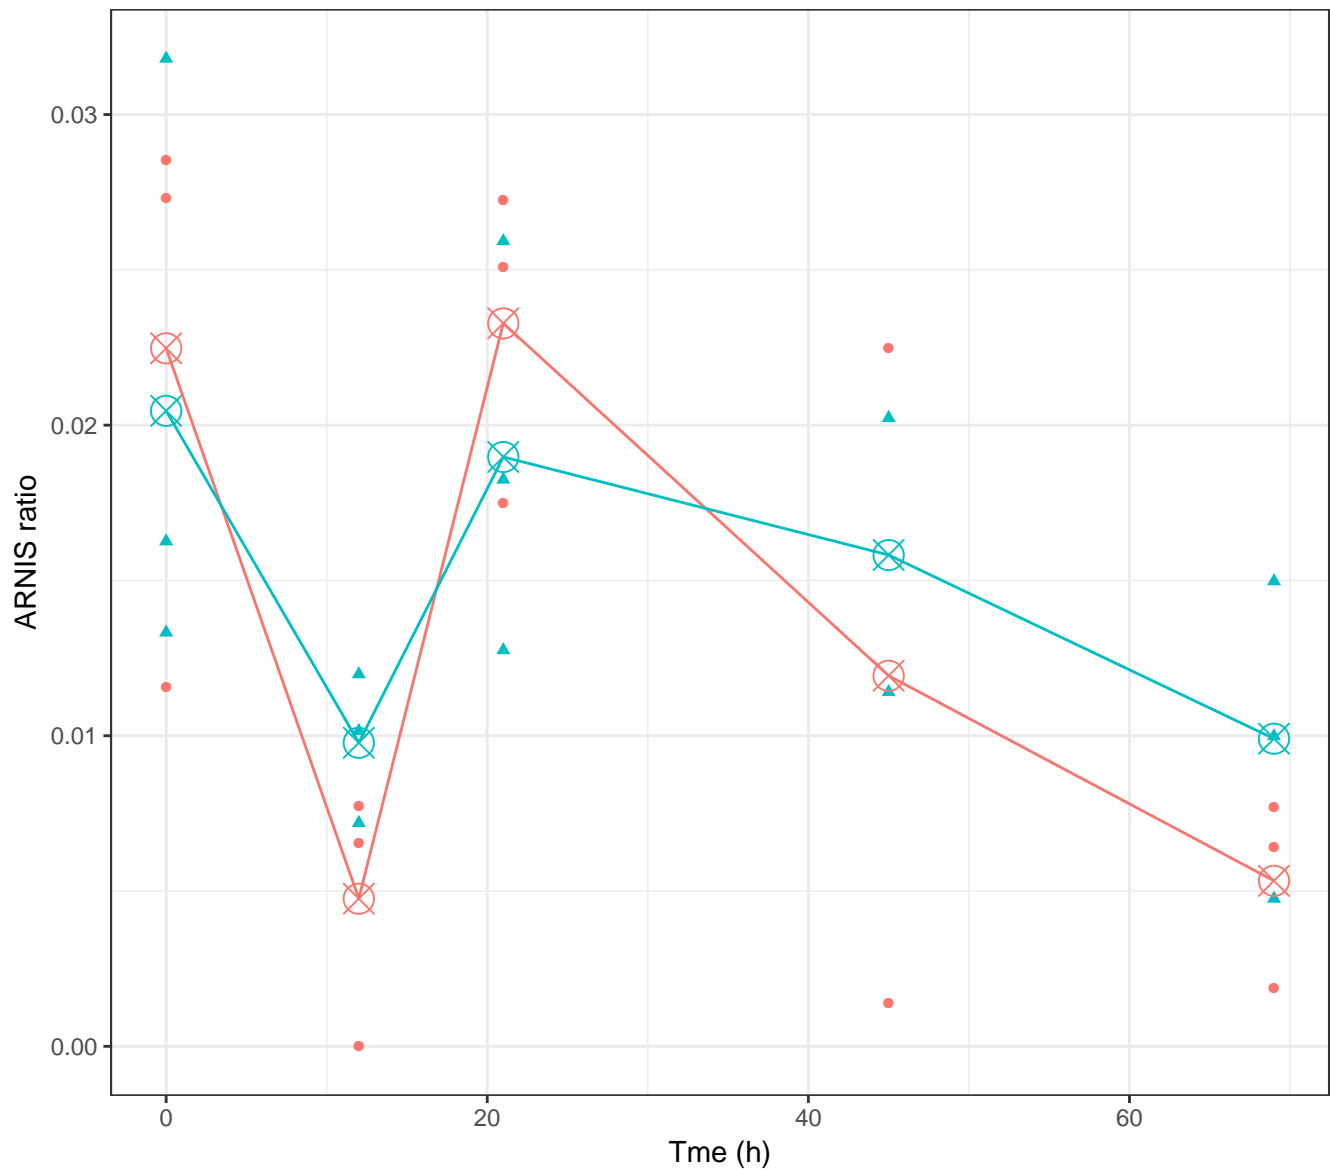



# OTU.527\_Verrucomicrobia\_Chthoniobacterales

Treatment Control Filtered-1micron

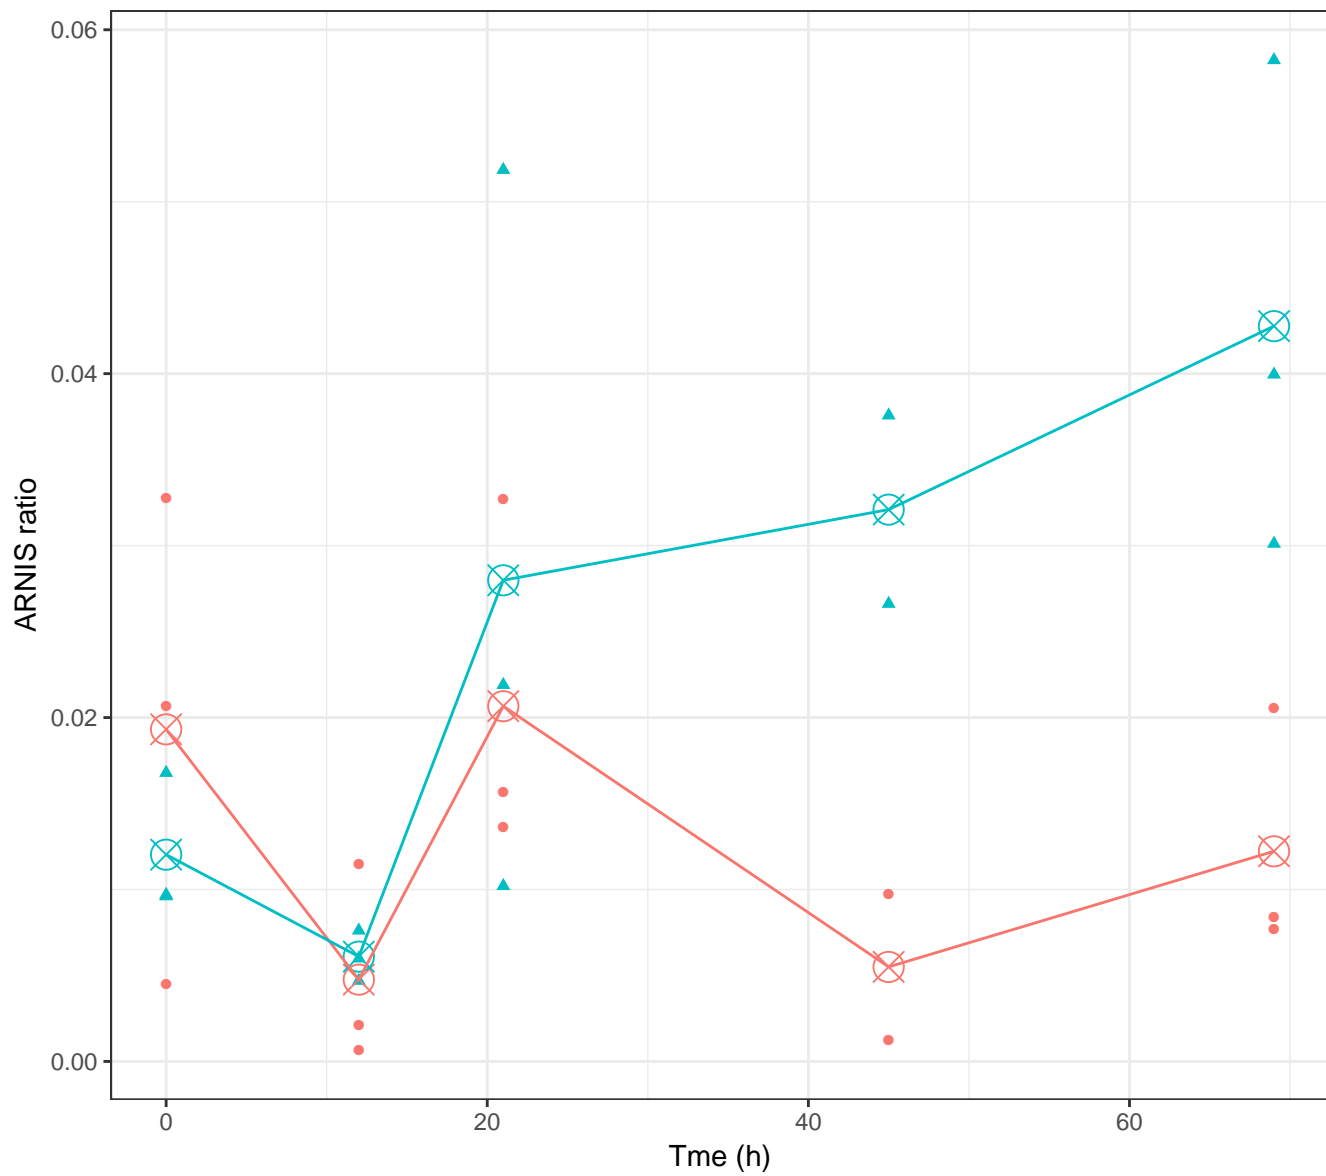

# OTU.388\_Actinobacteria\_CL500.29\_marine\_group.freshwater\_acIV.C\_clade

Treatment ⊗ Control ⊗ Filtered-1micron

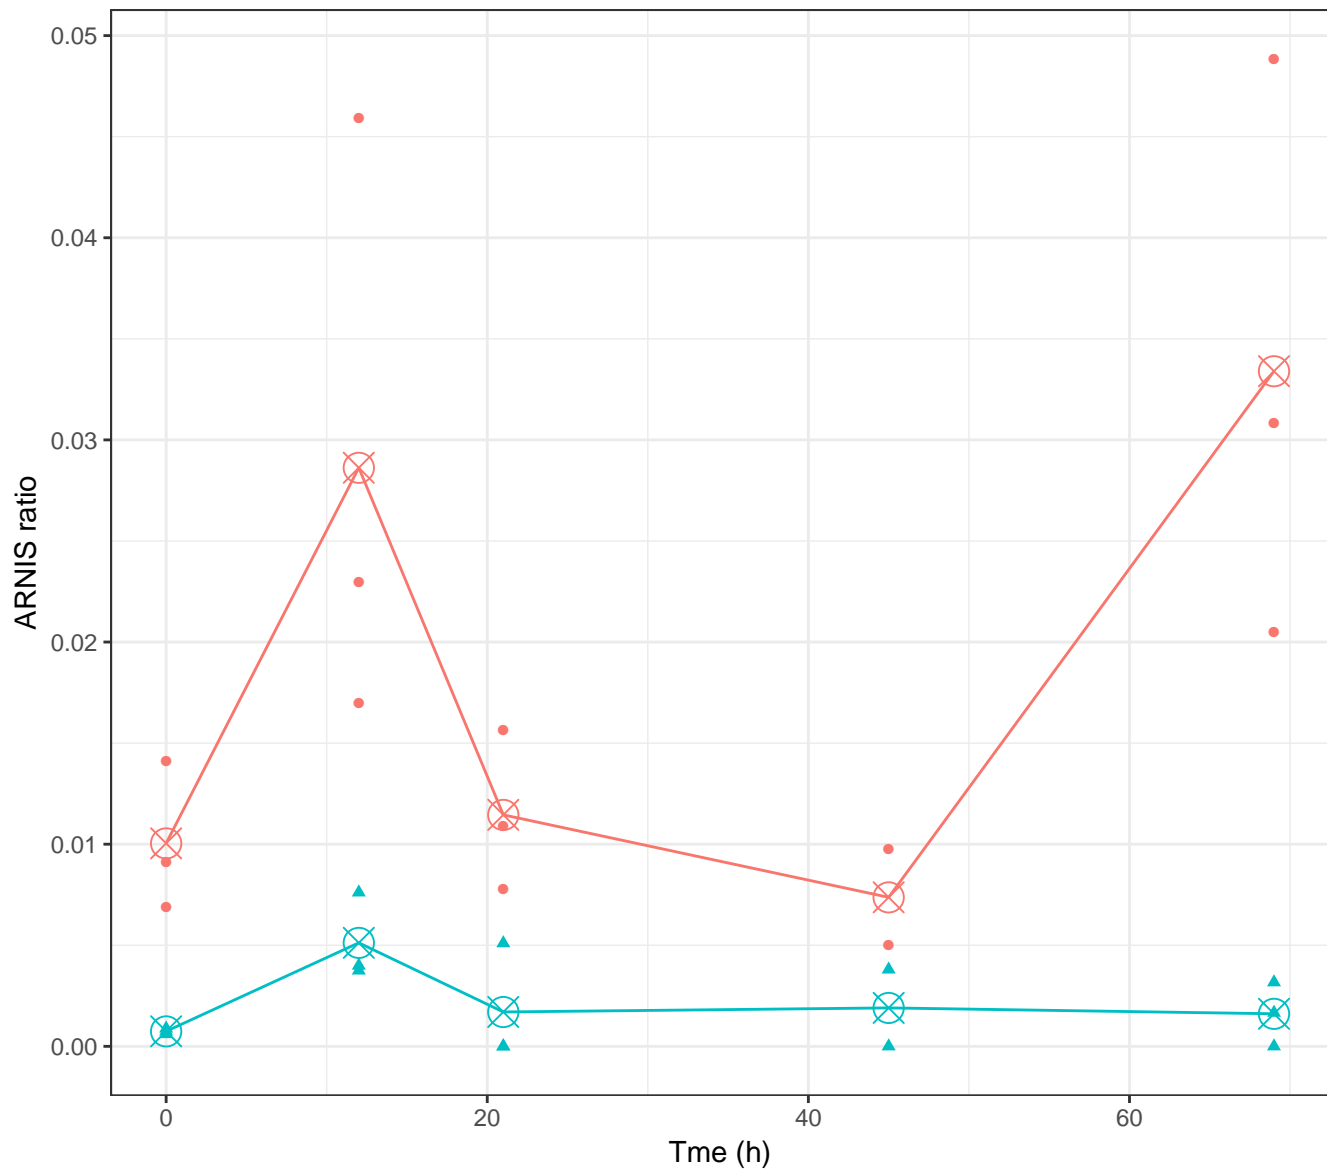

# OTU.496\_Alphaproteobacteria\_Acetobacteraceae

Treatment  Control  Filtered-1micron

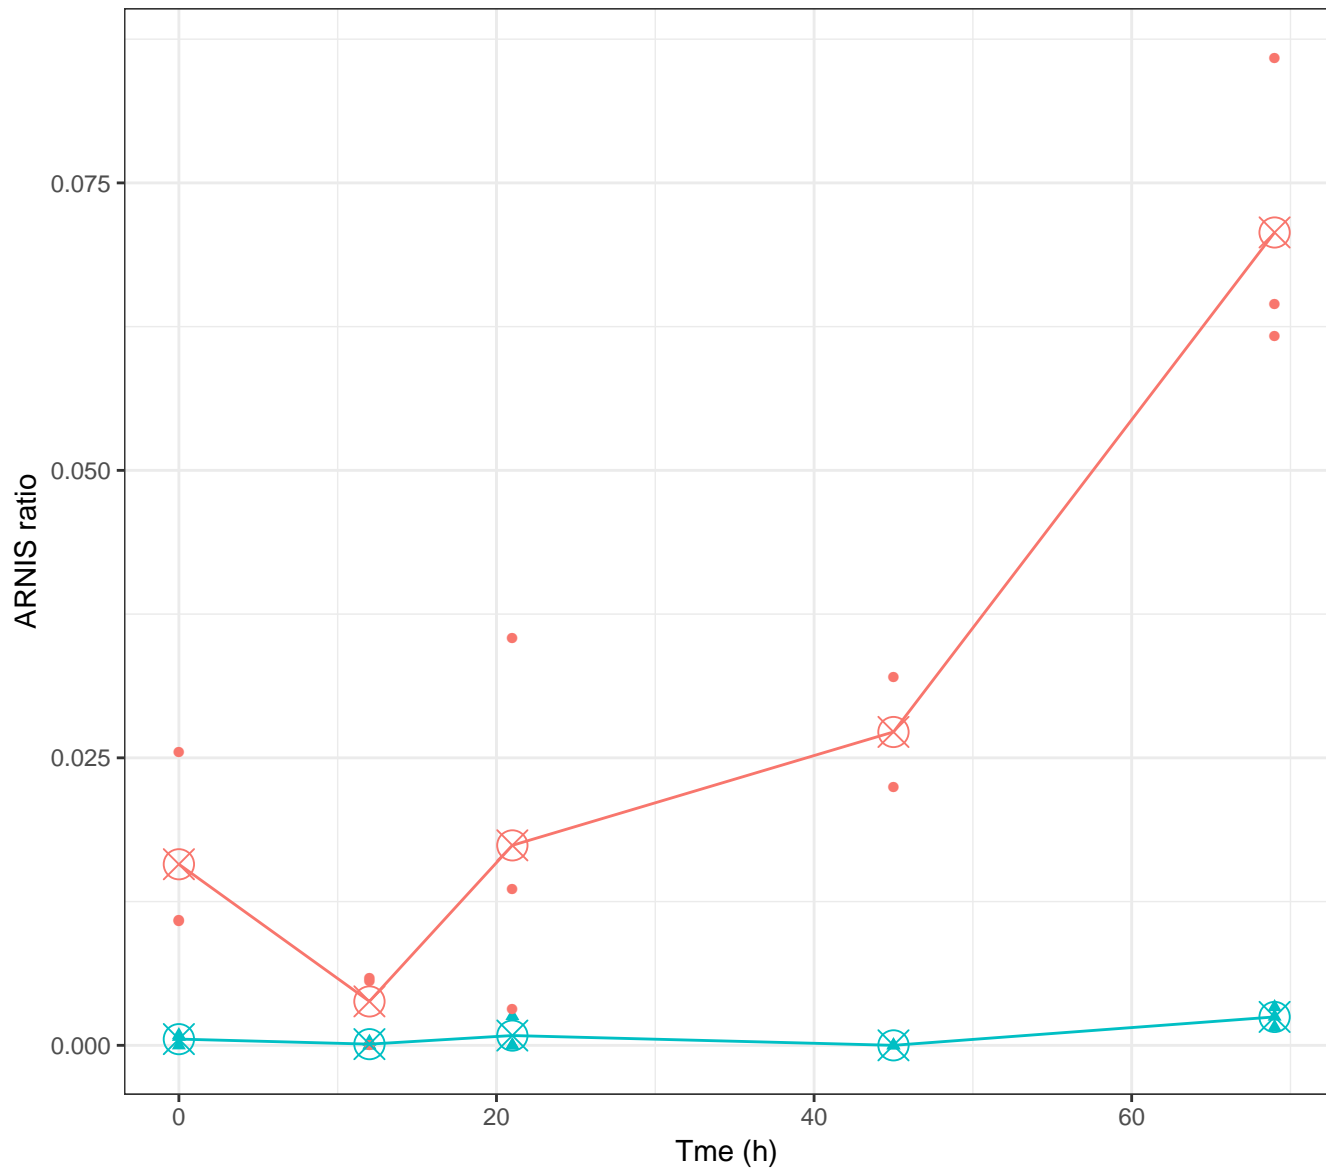

# OTU.54\_Actinobacteria\_Acidimicrobiales

Treatment Control Filtered-1micron

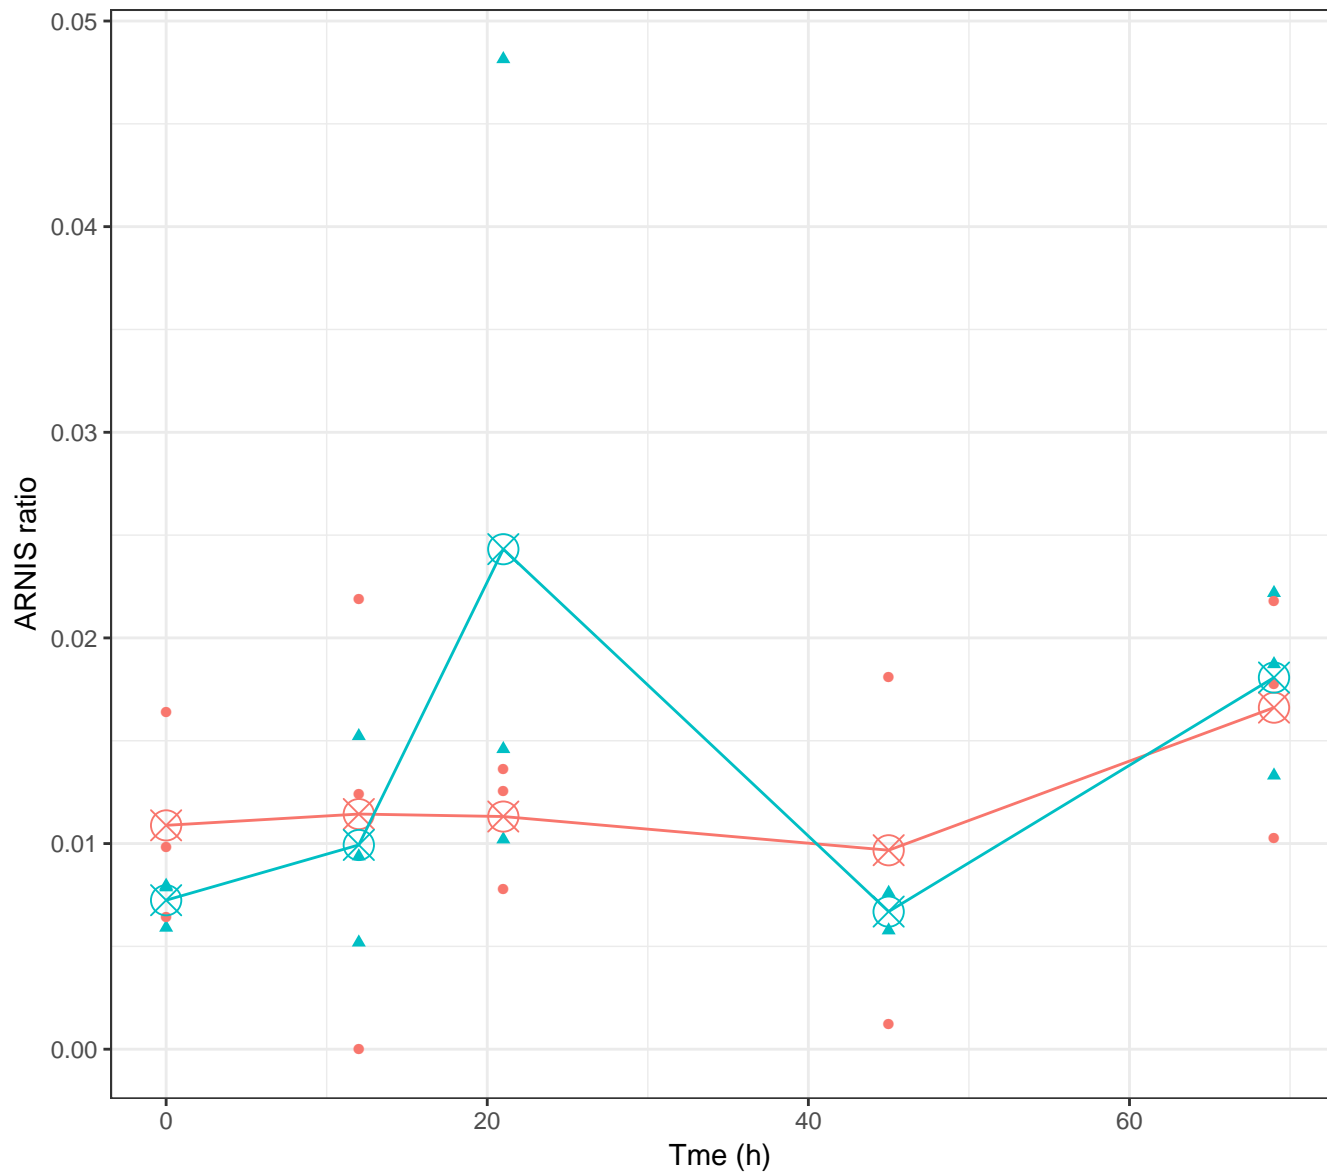

# OTU.6410\_Bacteroidetes\_Flavobacteriaceae

Treatment  Control  Filtered-1micron

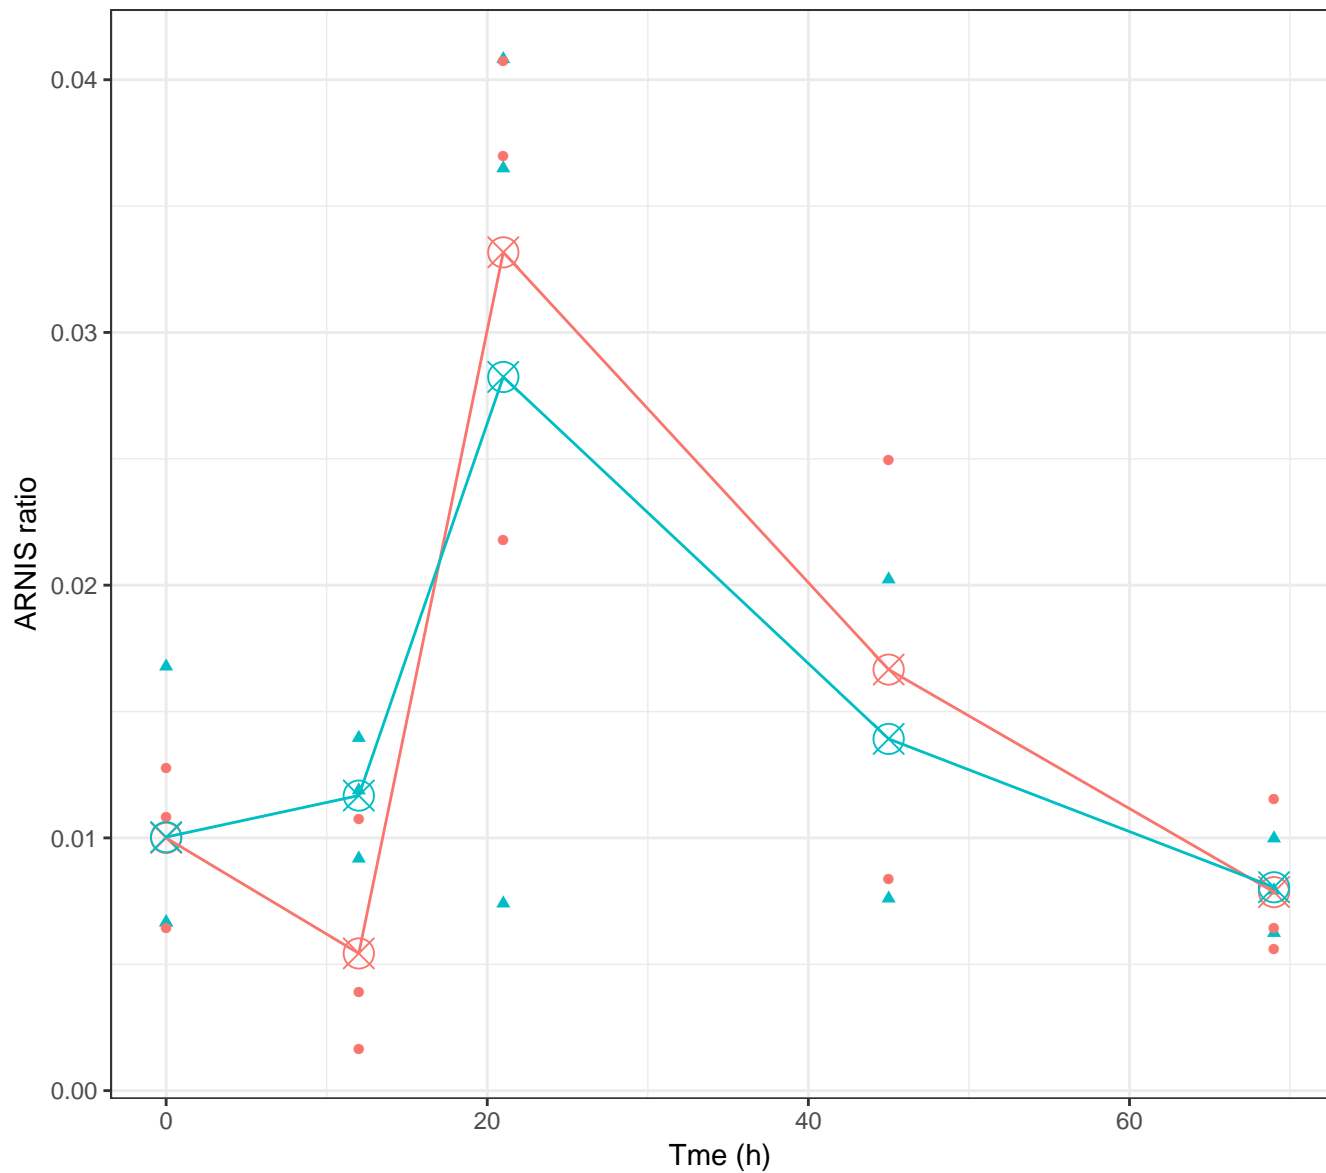

# OTU.473\_Actinobacteria\_Candidatus\_Limnoluna

Treatment Control Filtered-1micron

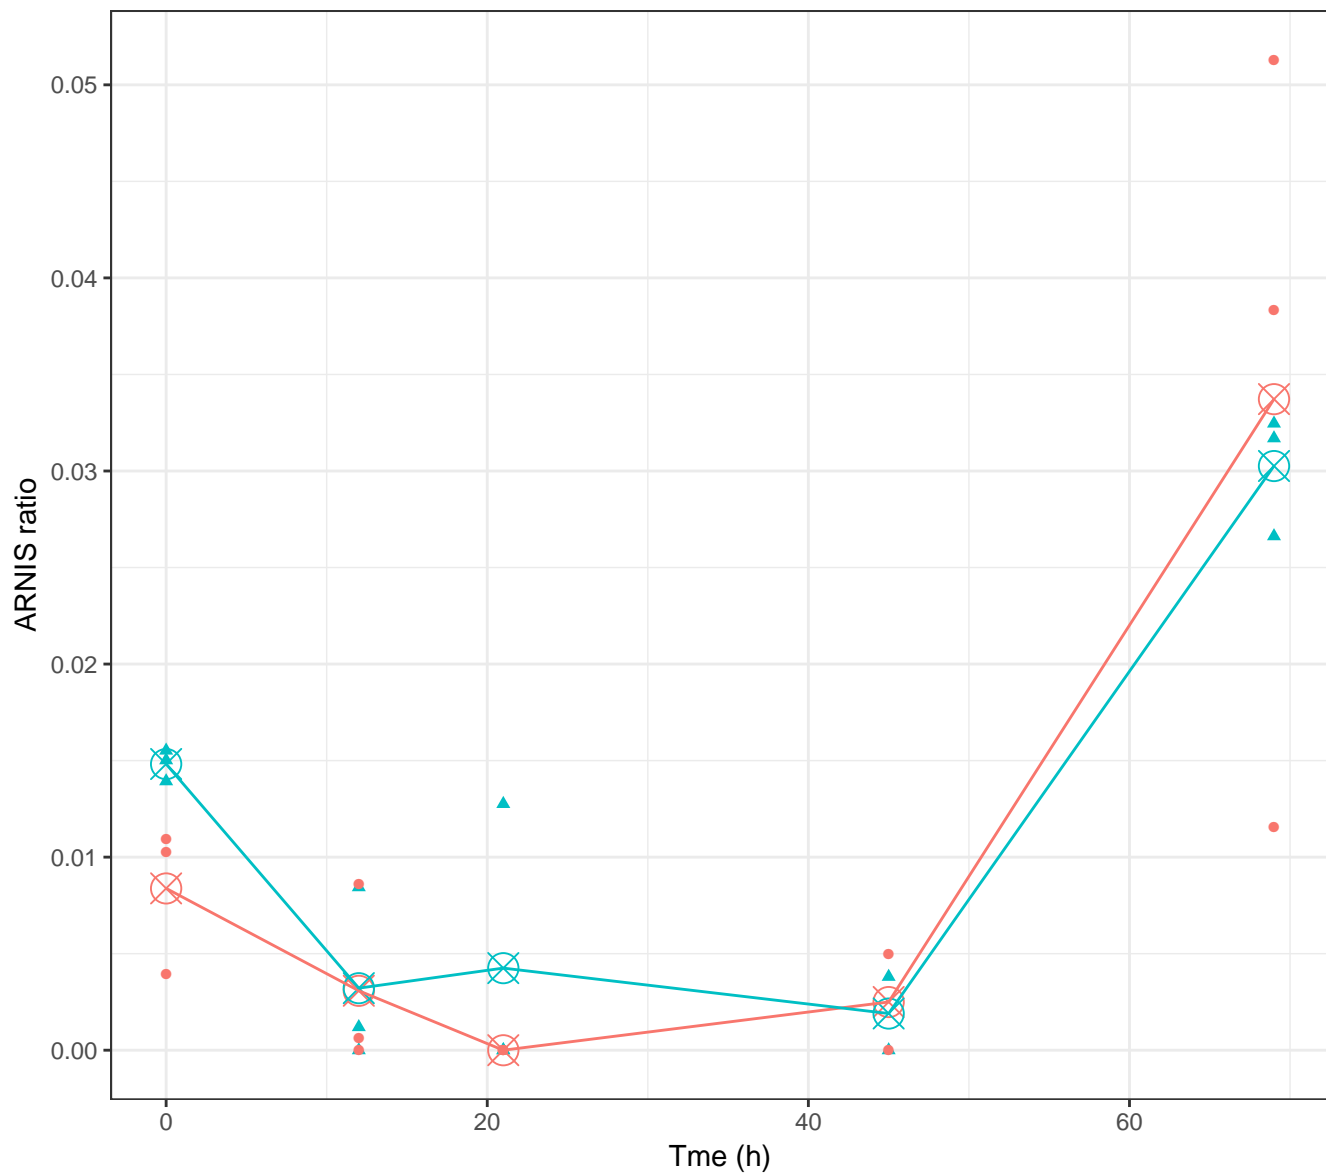

# OTU.360\_Alphaproteobacteria\_Rhodospirillales

Treatment Control Filtered-1micron

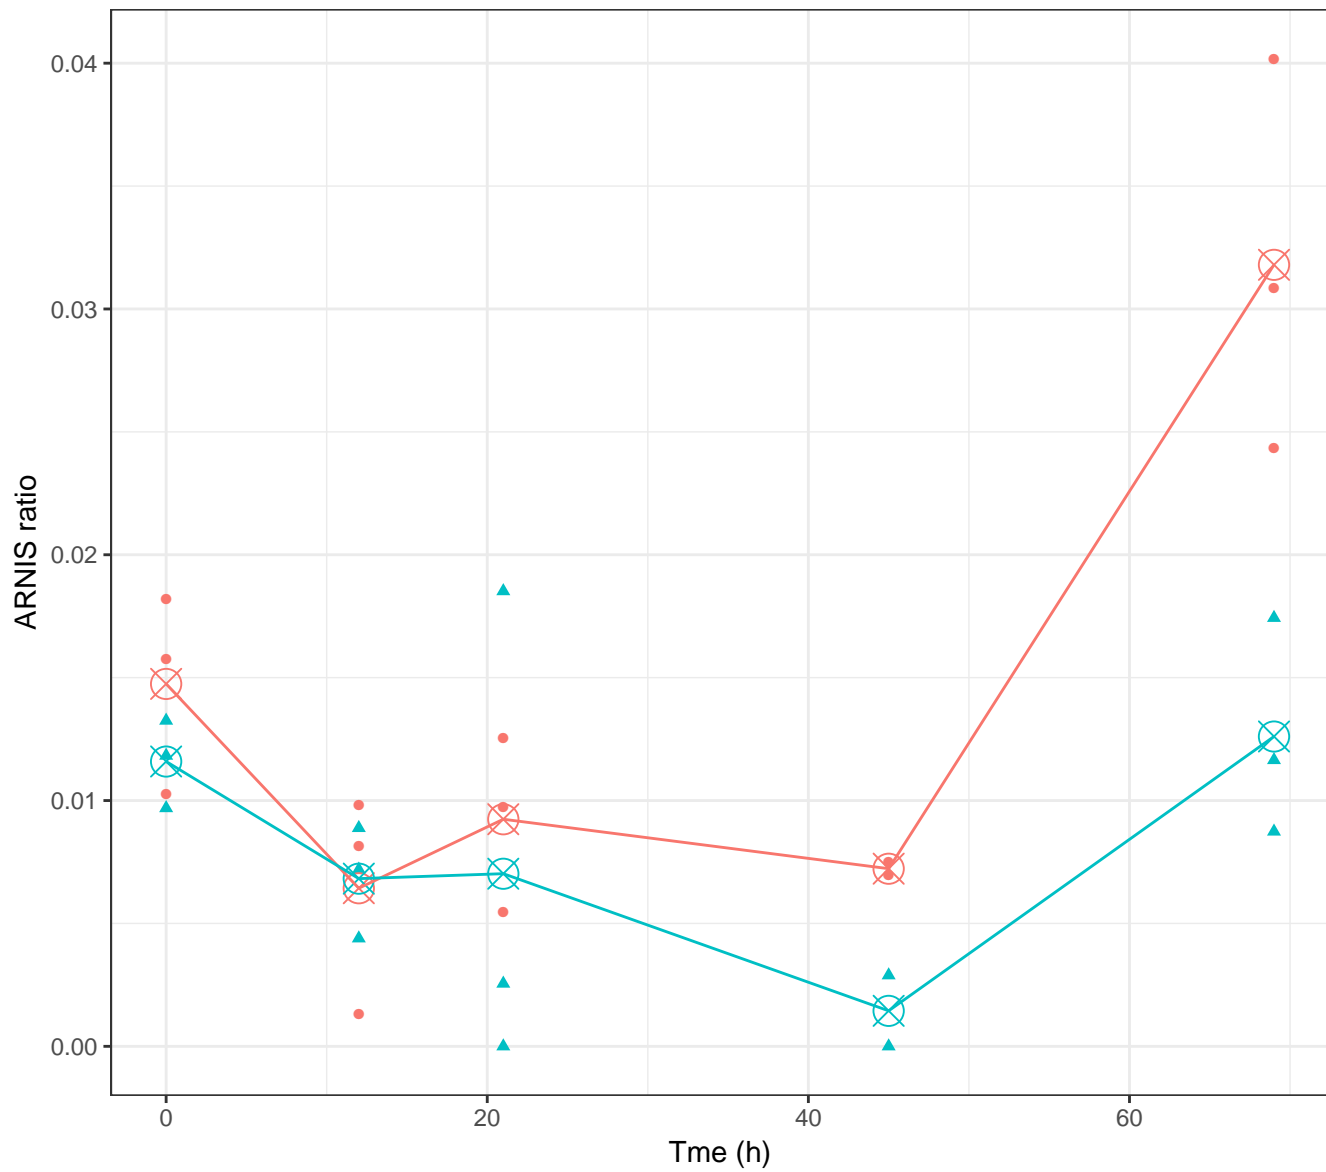

# OTU.917\_Verrucomicrobia\_FukuN18\_freshwater\_group

Treatment ⊗ Control ⊗ Filtered-1micron

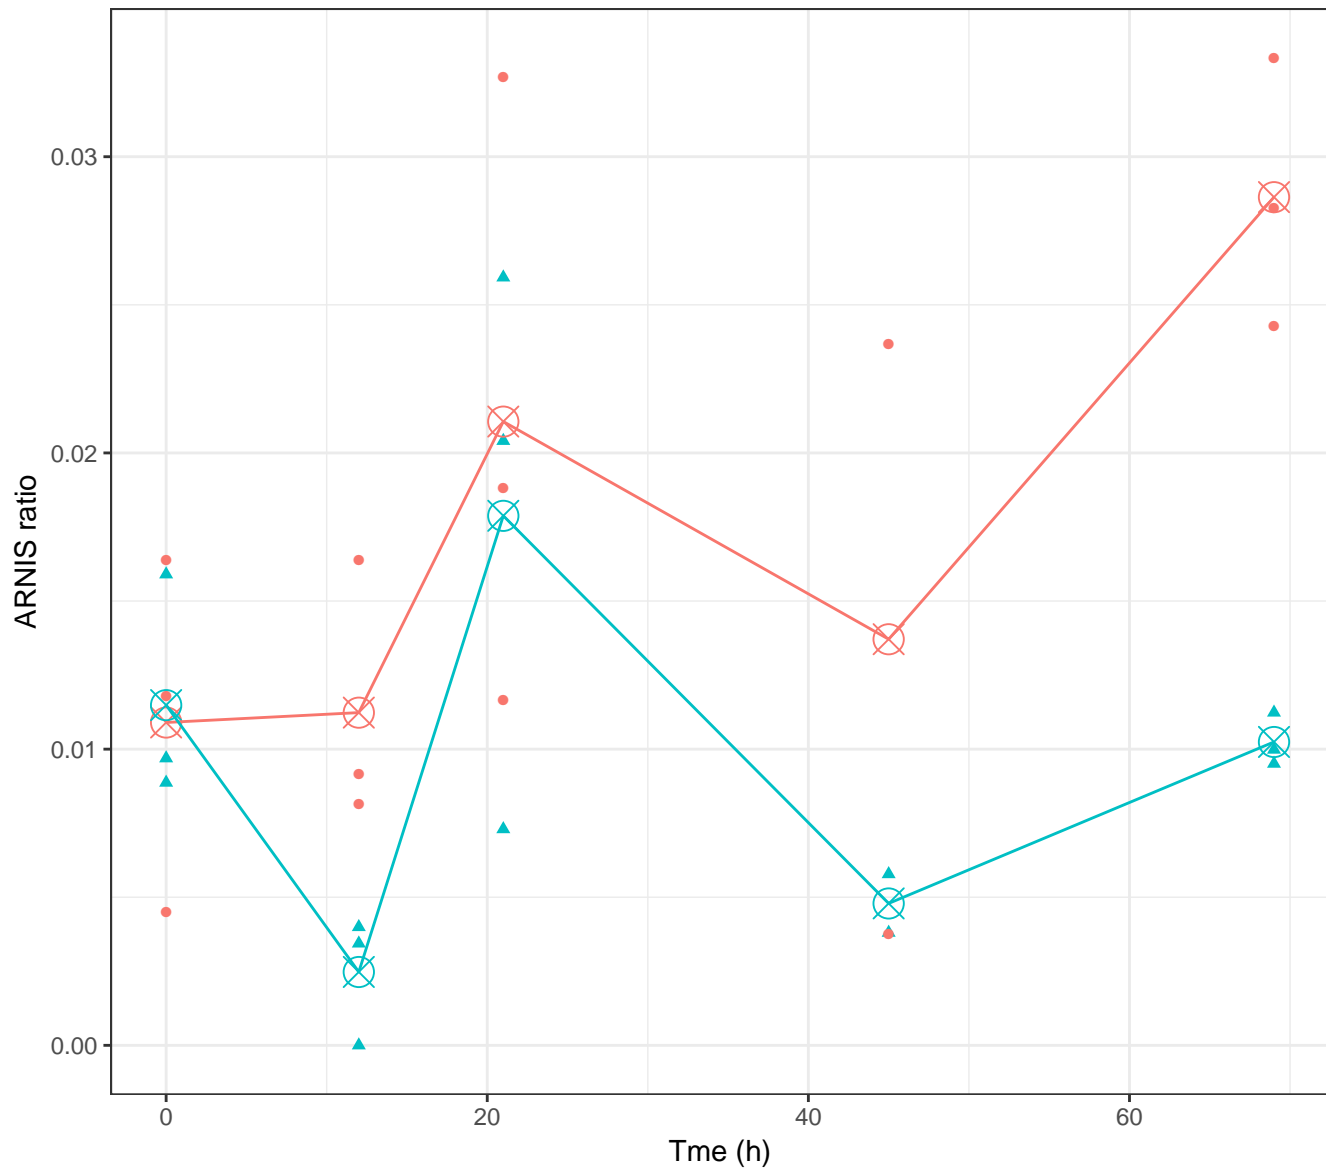



# OTU.432\_Alphaproteobacteria\_Roseomonas

Treatment Control Filtered-1micron

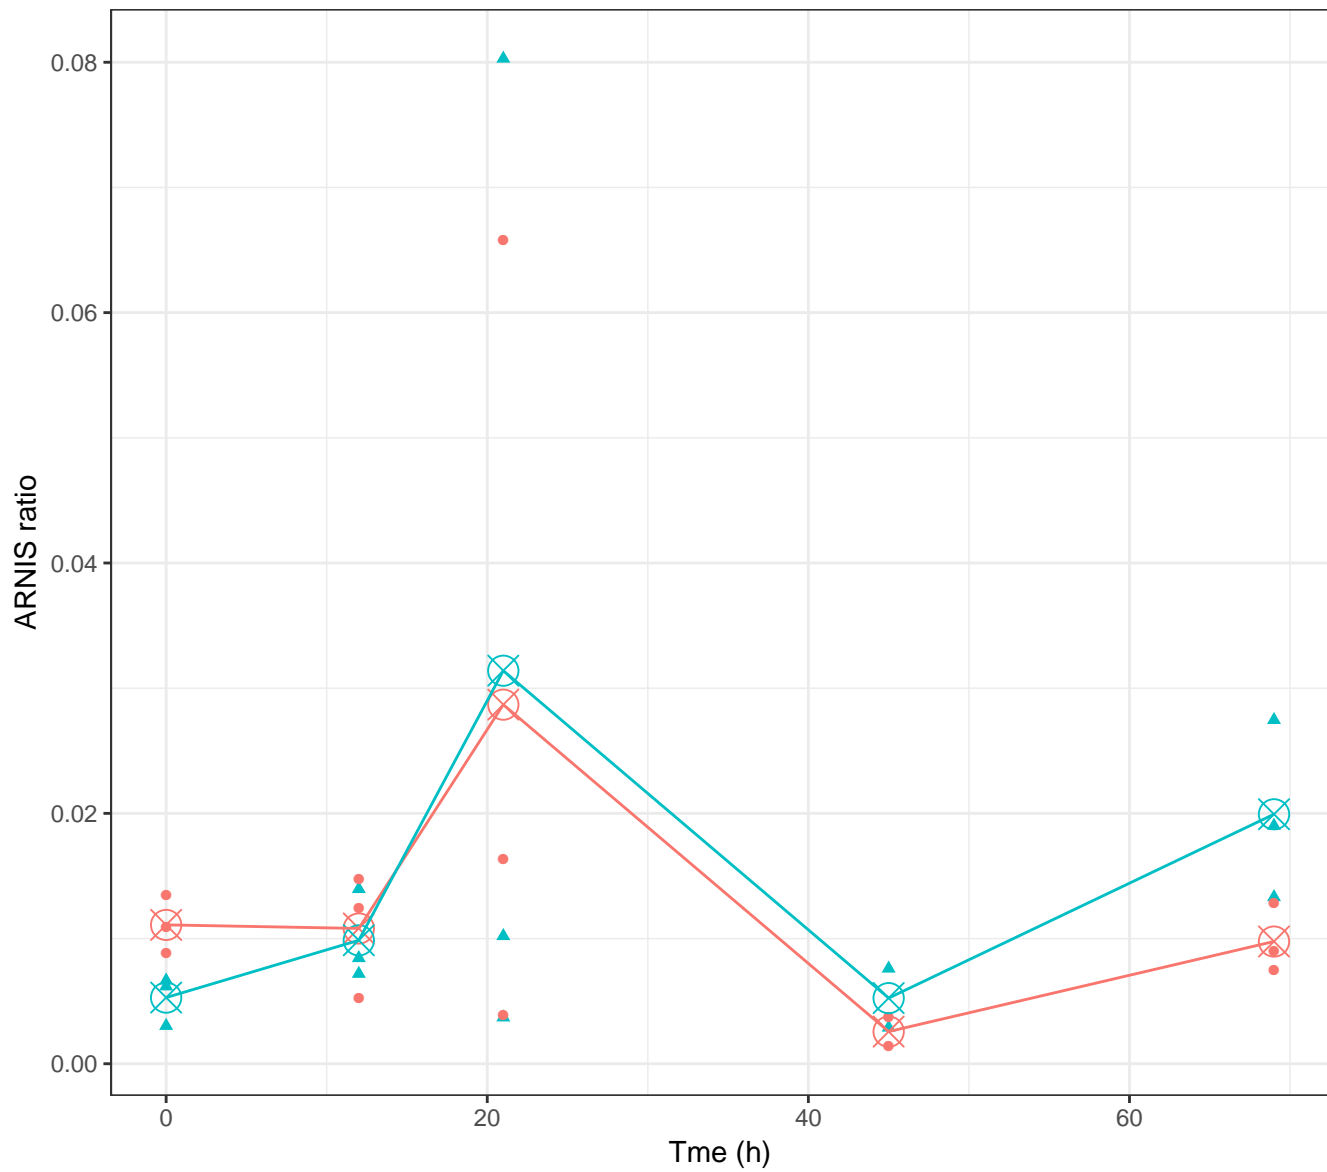

## OTU.435\_Verrucomicrobia\_Verrucomicrobiales\_DEV007

Treatment Control Filtered-1micron

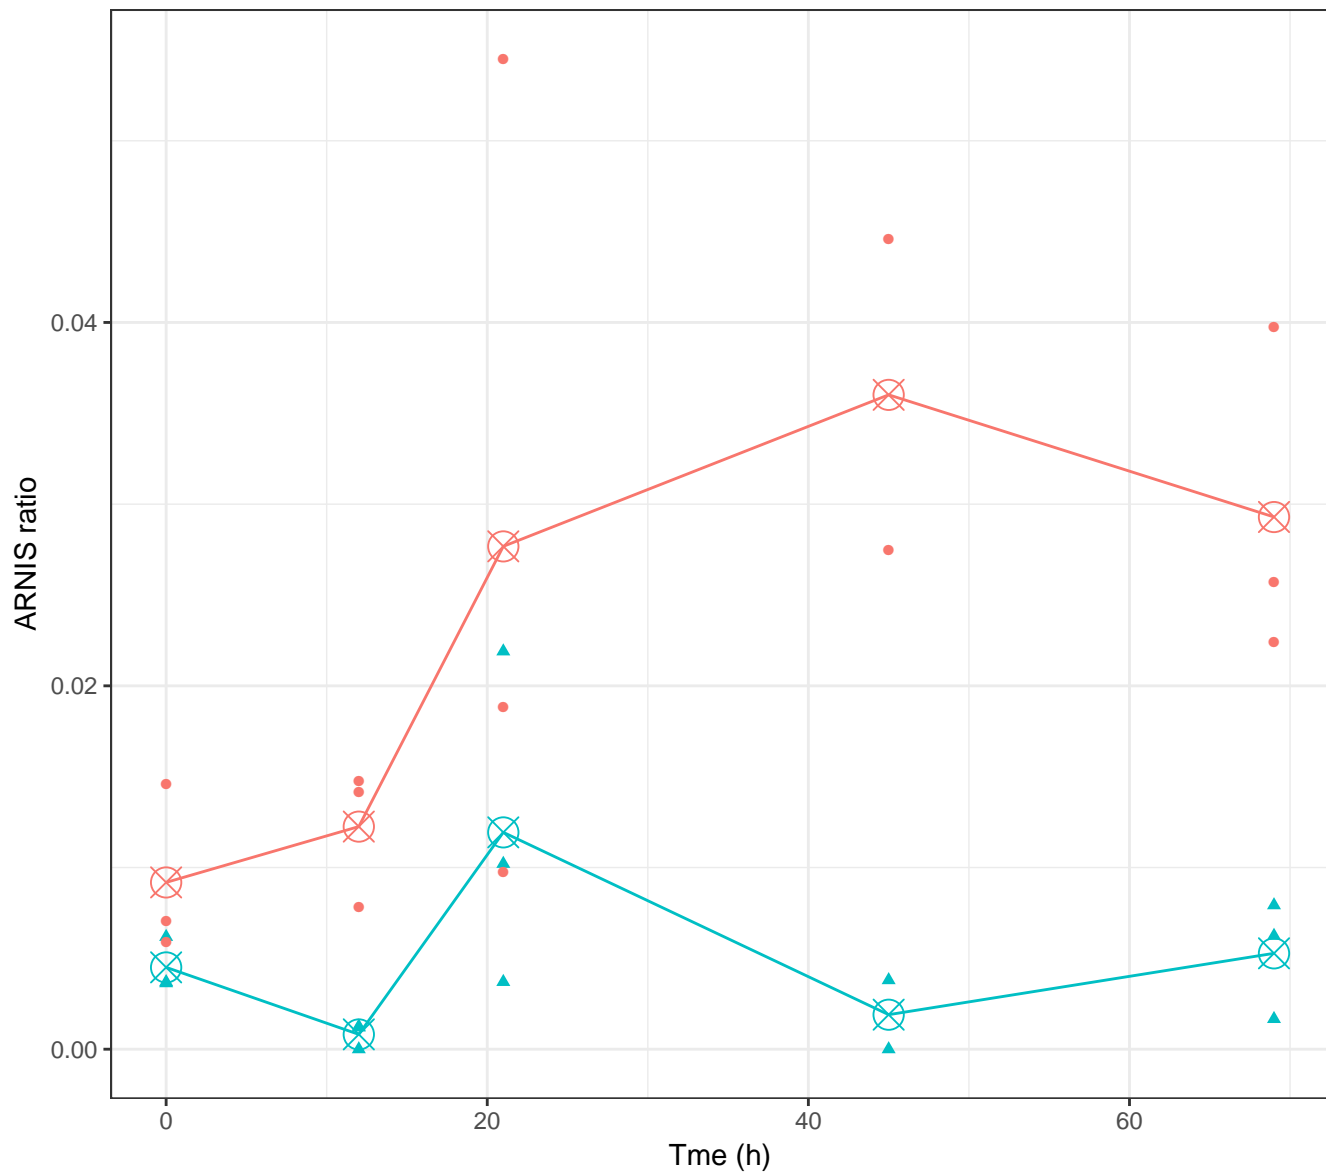

# OTU.355\_Betaproteobacteria\_Collimonas

Treatment Control Filtered-1micron

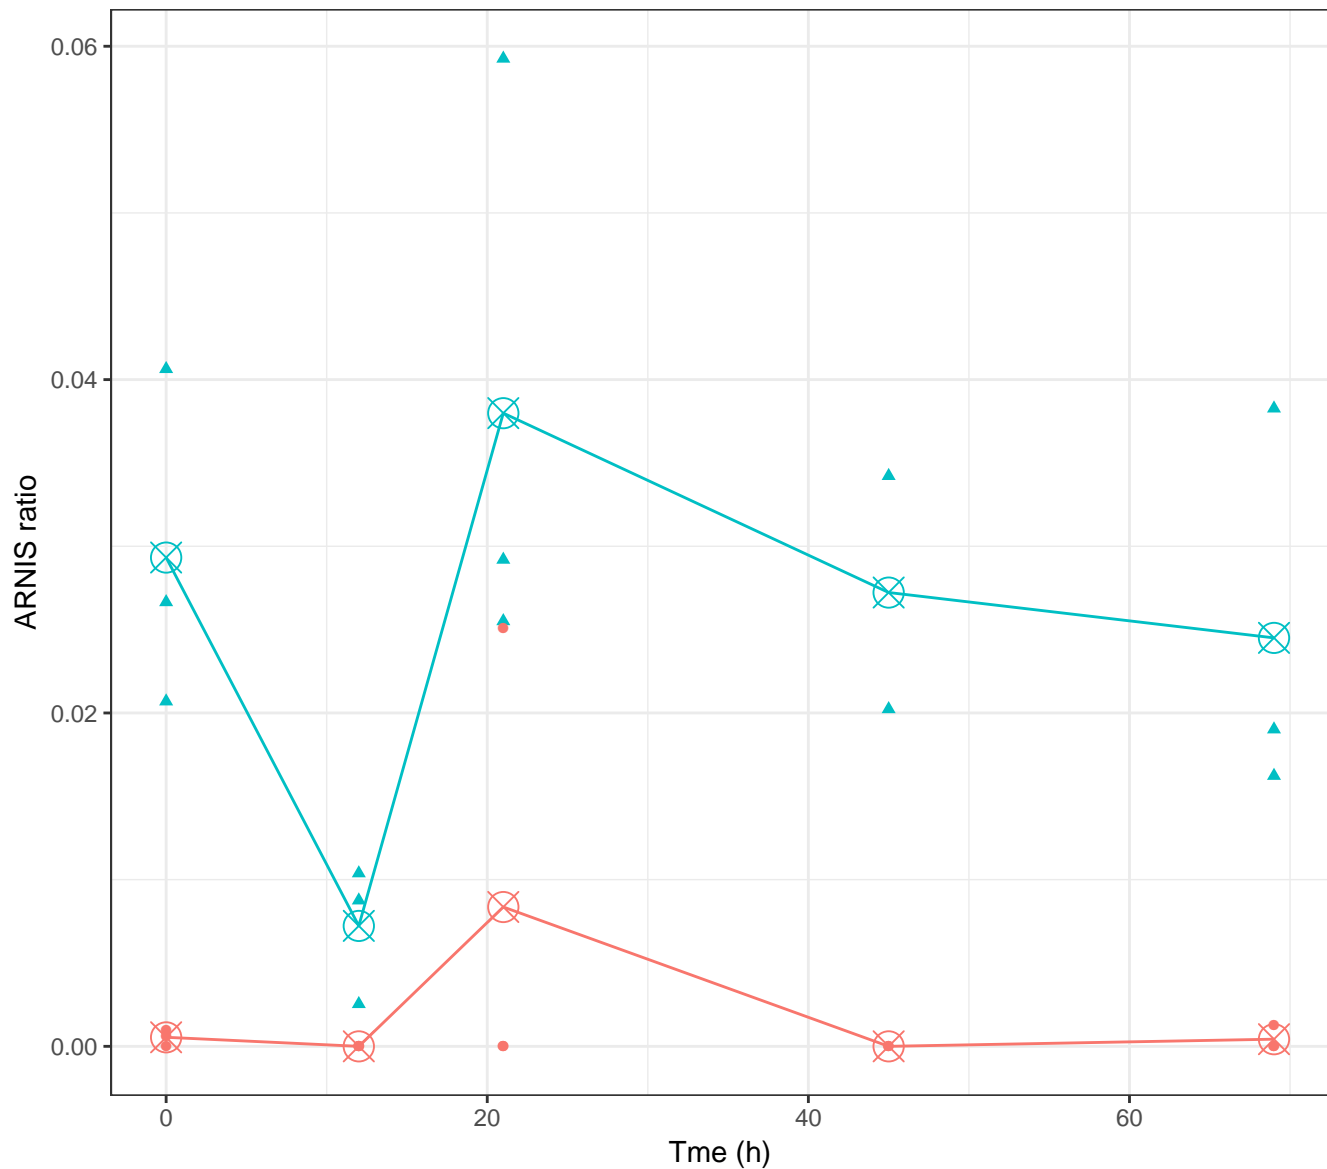

# OTU.379\_Gammaproteobacteria\_CHAB.XI.27

Treatment ⊗ Control ⊗ Filtered-1micron

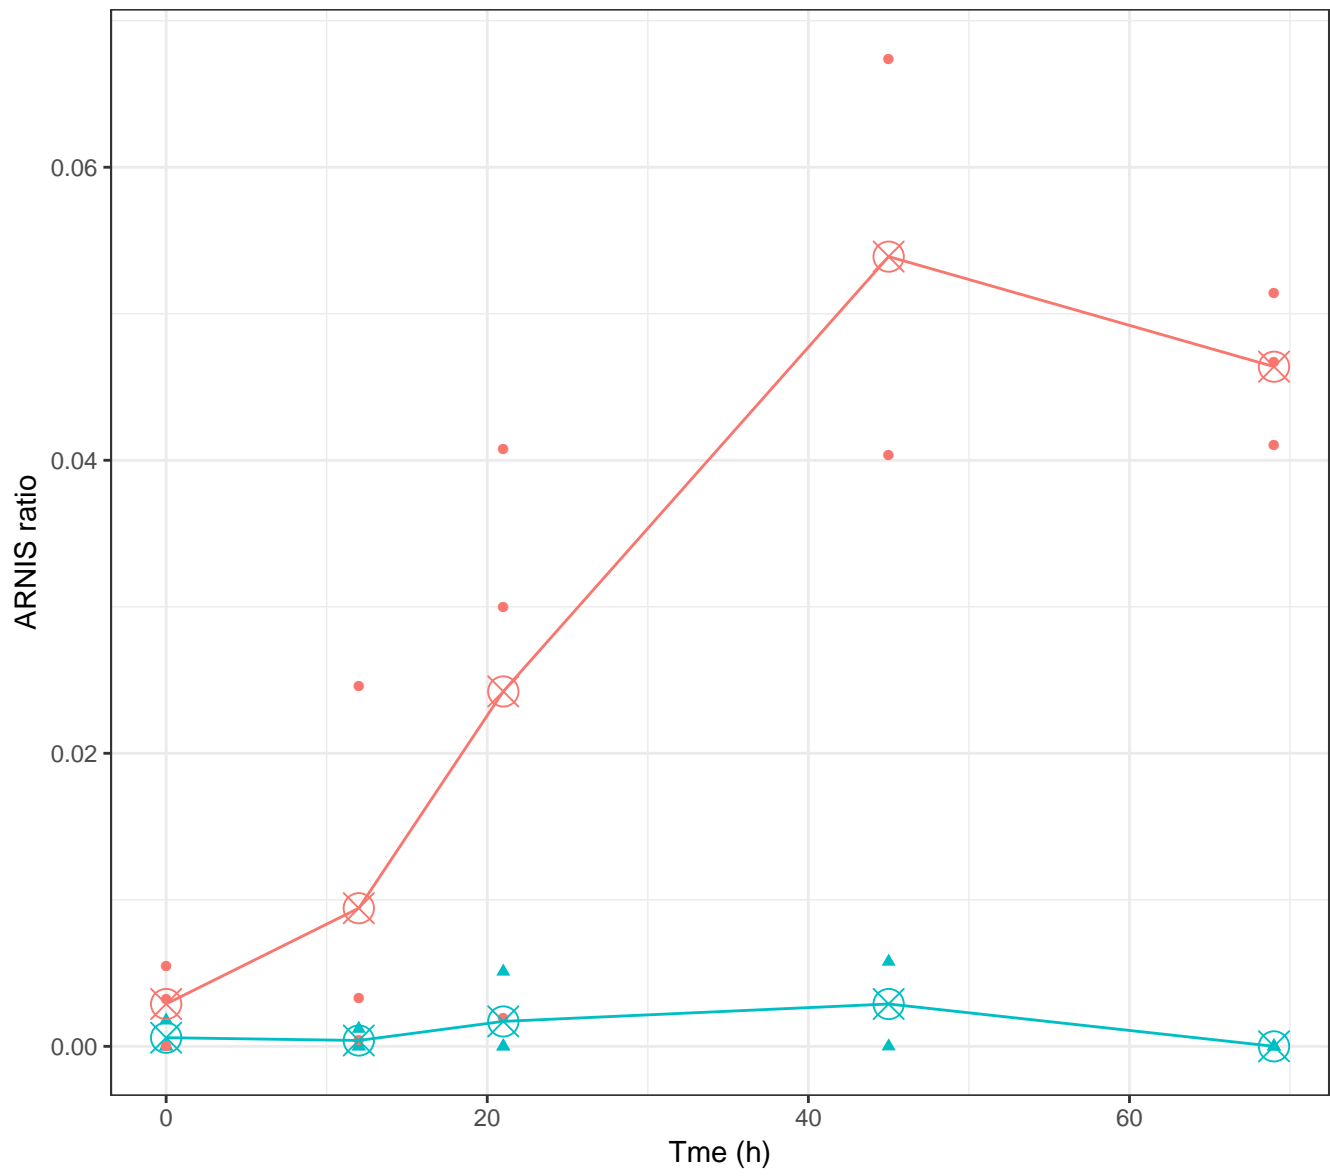

# OTU.461\_Actinobacteria\_clade\_acl.A

Treatment Control Filtered-1micron

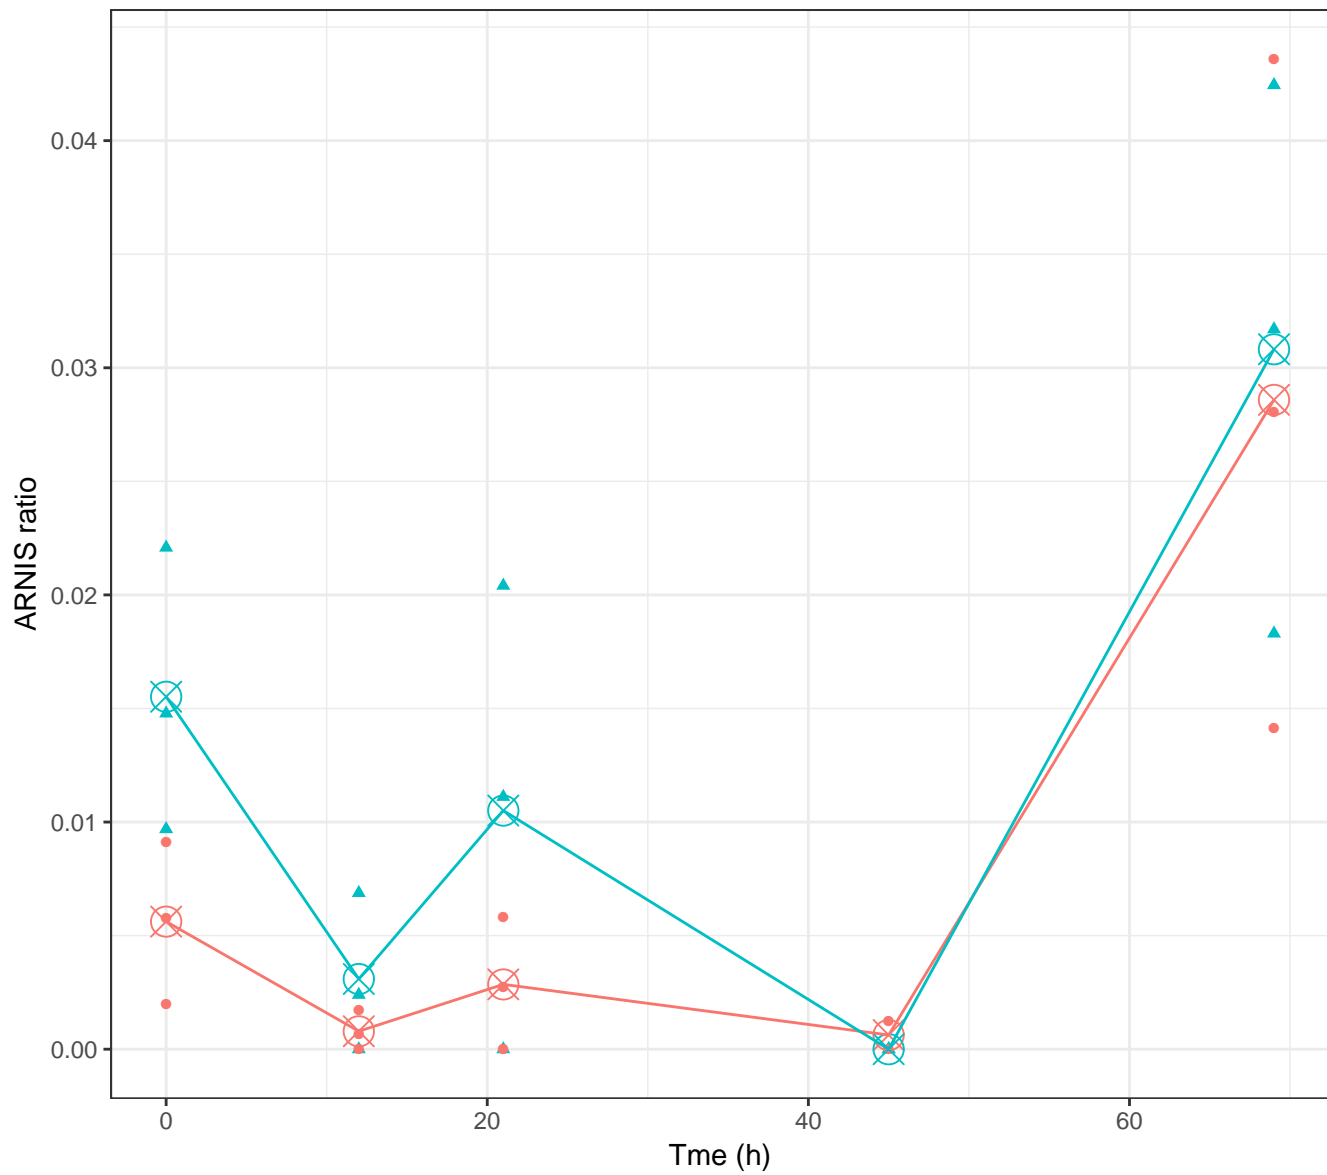

# OTU.375\_Bacteroidetes\_NS9\_marine\_group

Treatment  Control  Filtered-1micron

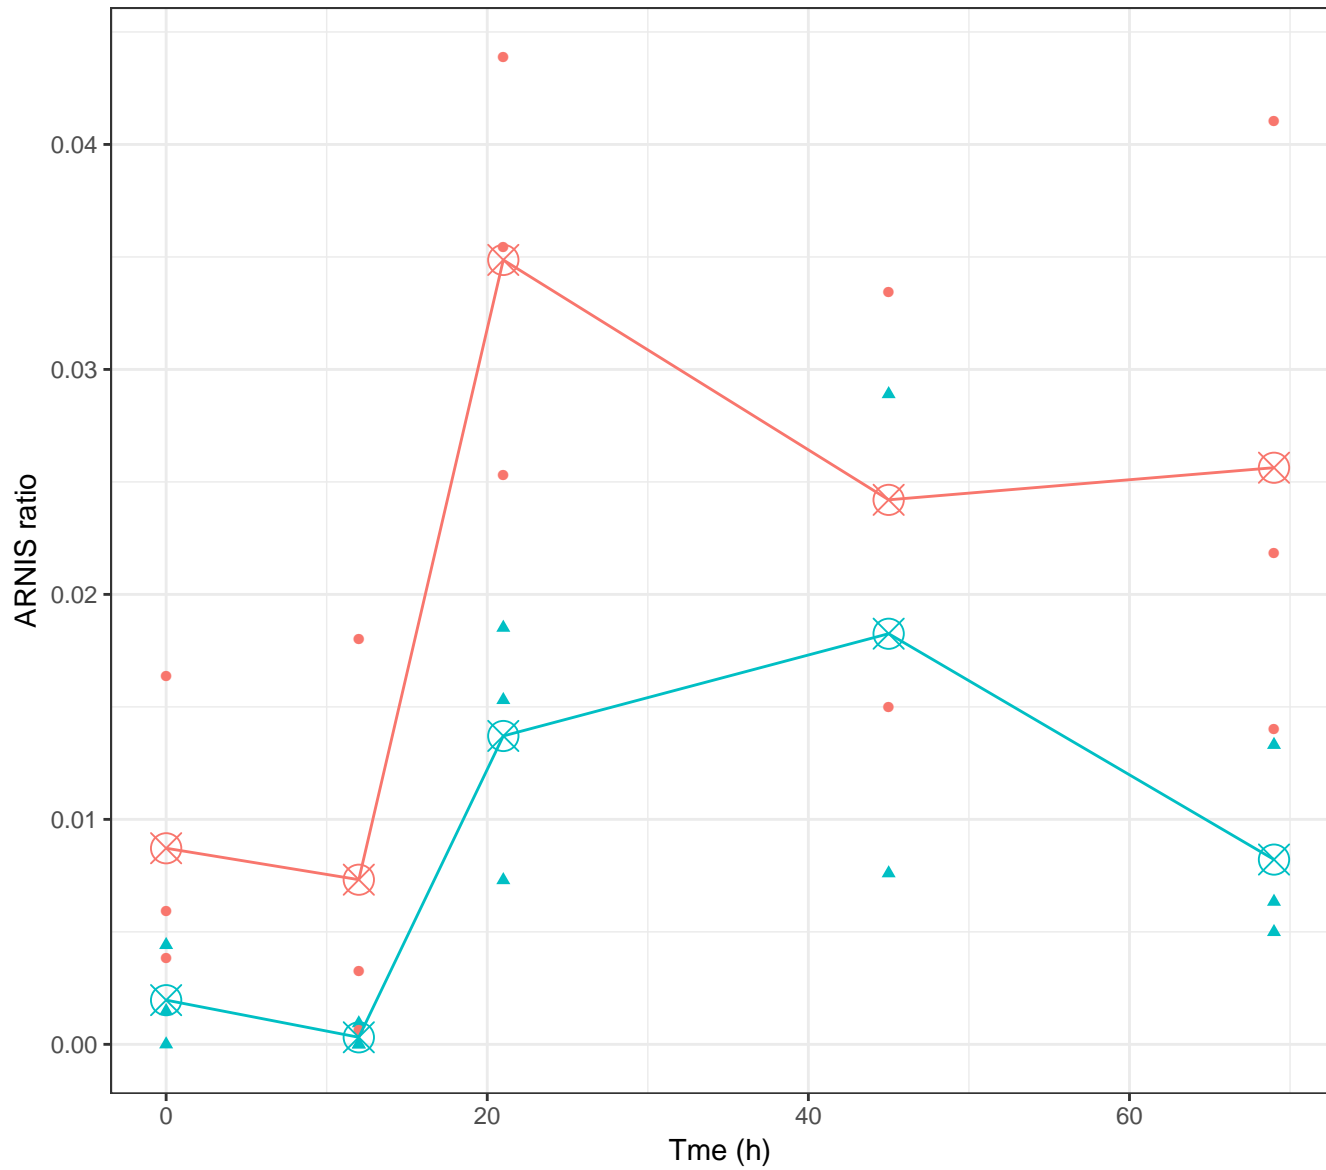

# OTU.8\_Bacteroidetes\_Sediminibacterium

Treatment Control Filtered-1micron

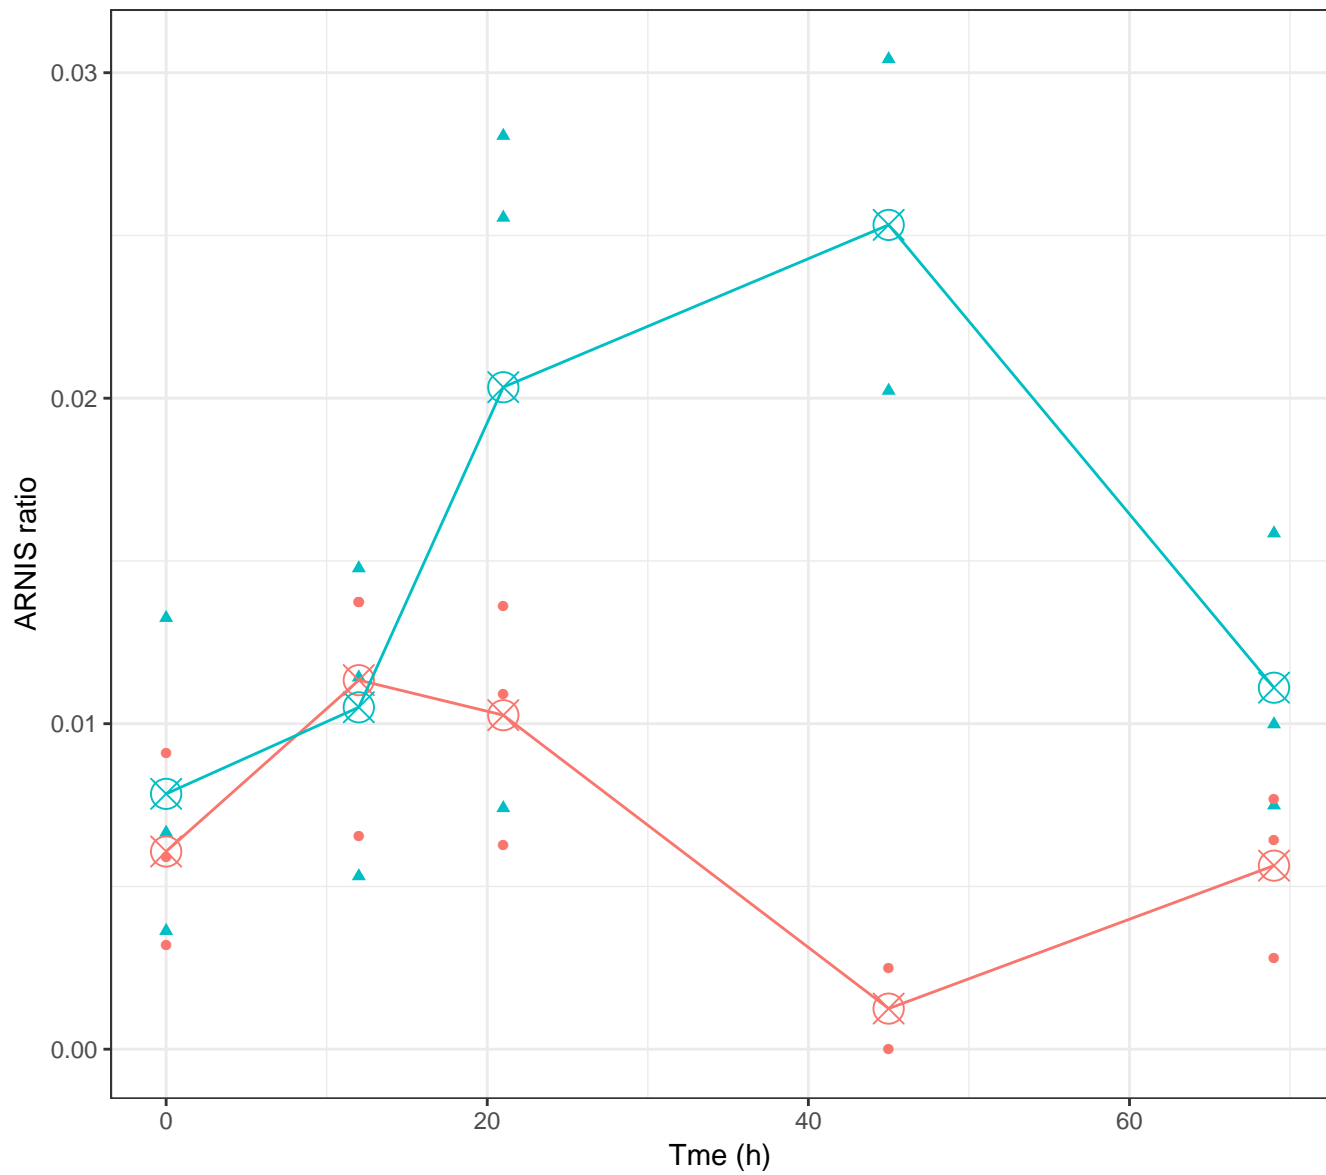

# OTU.616\_Betaproteobacteria\_Rhodocyclaceae

Treatment ⊗ Control ⊗ Filtered-1micron

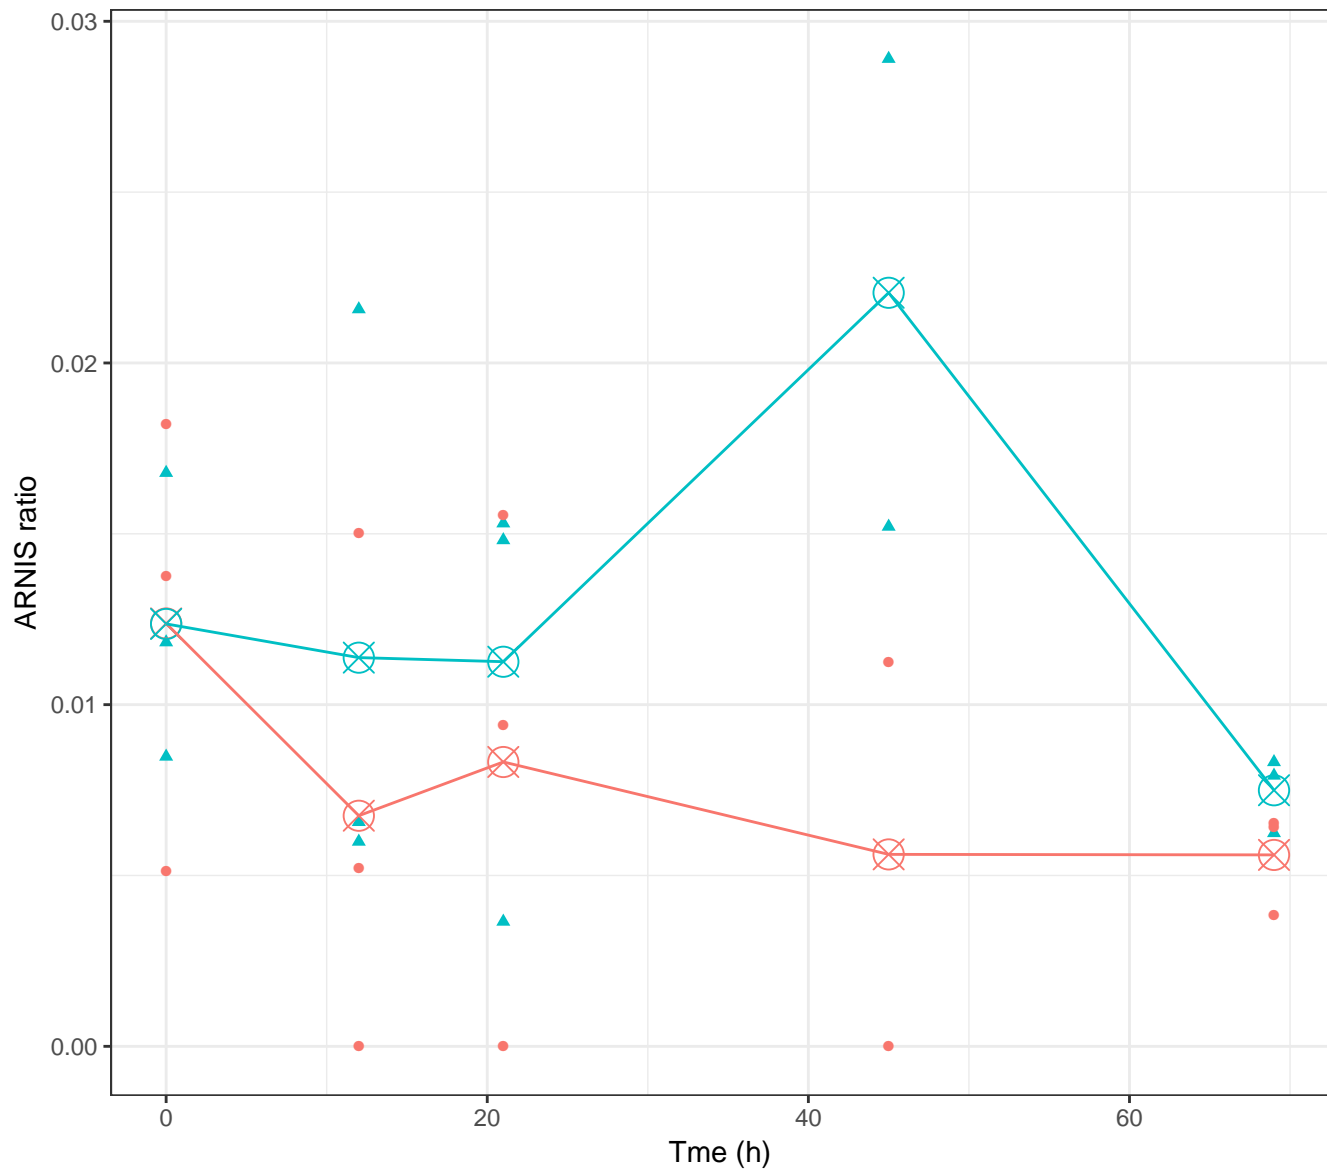



# OTU.2231\_Planctomyces\_Planctomycetaceae

Treatment Control Filtered-1micron

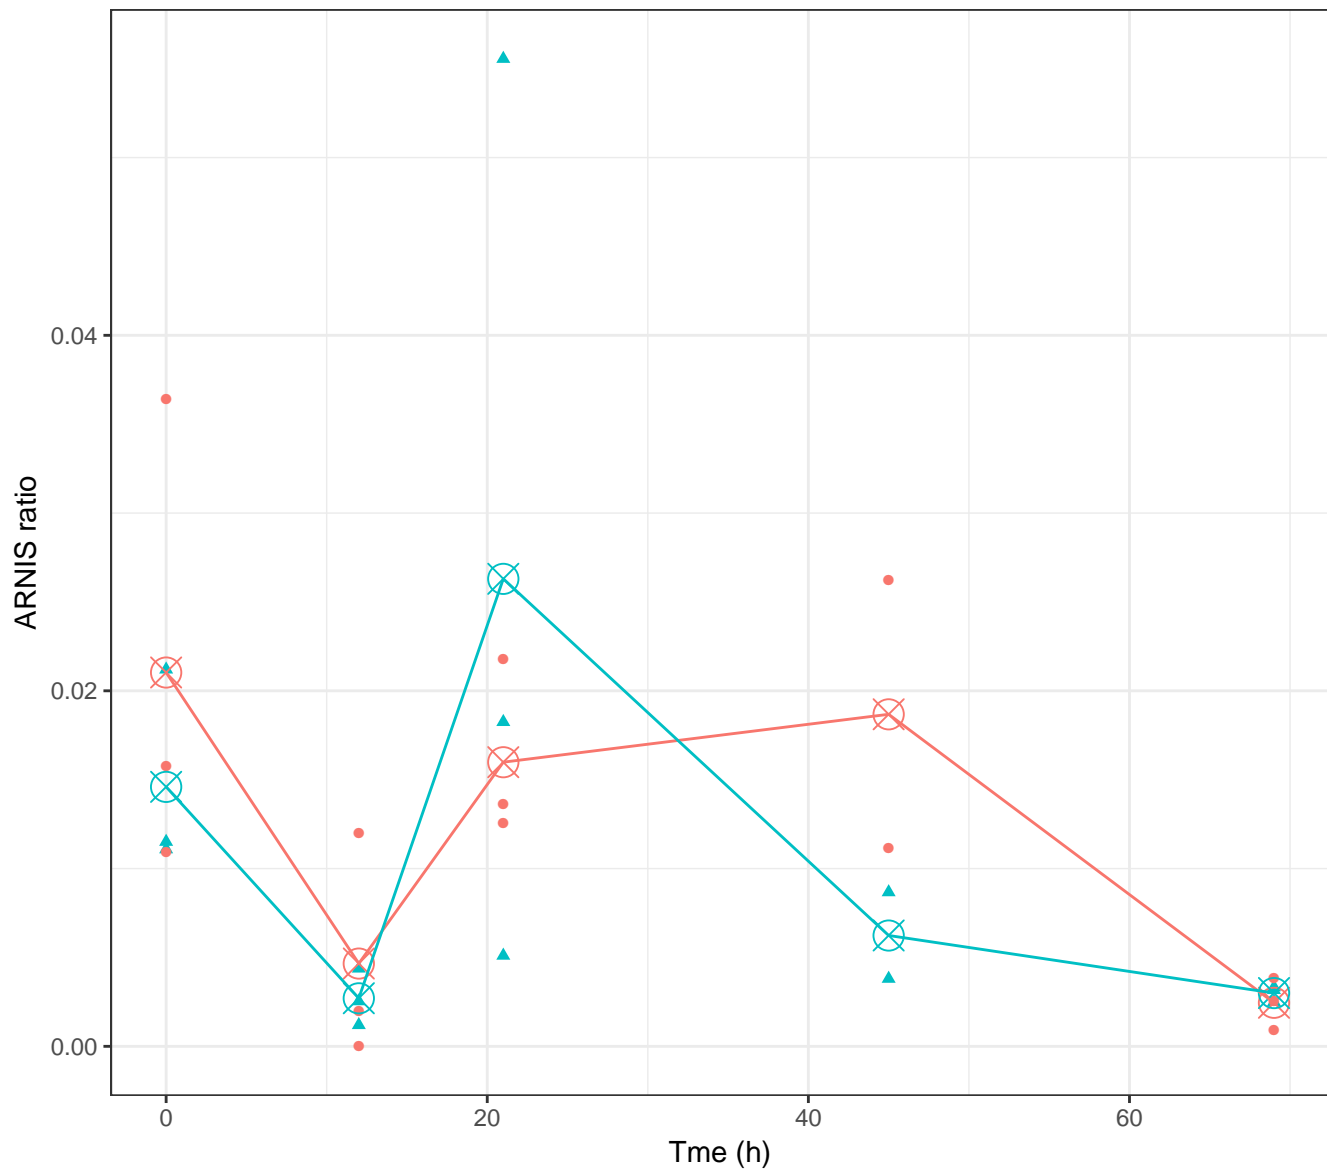

# OTU.744\_Betaproteobacteria\_Comamonadaceae

Treatment Control Filtered-1micron

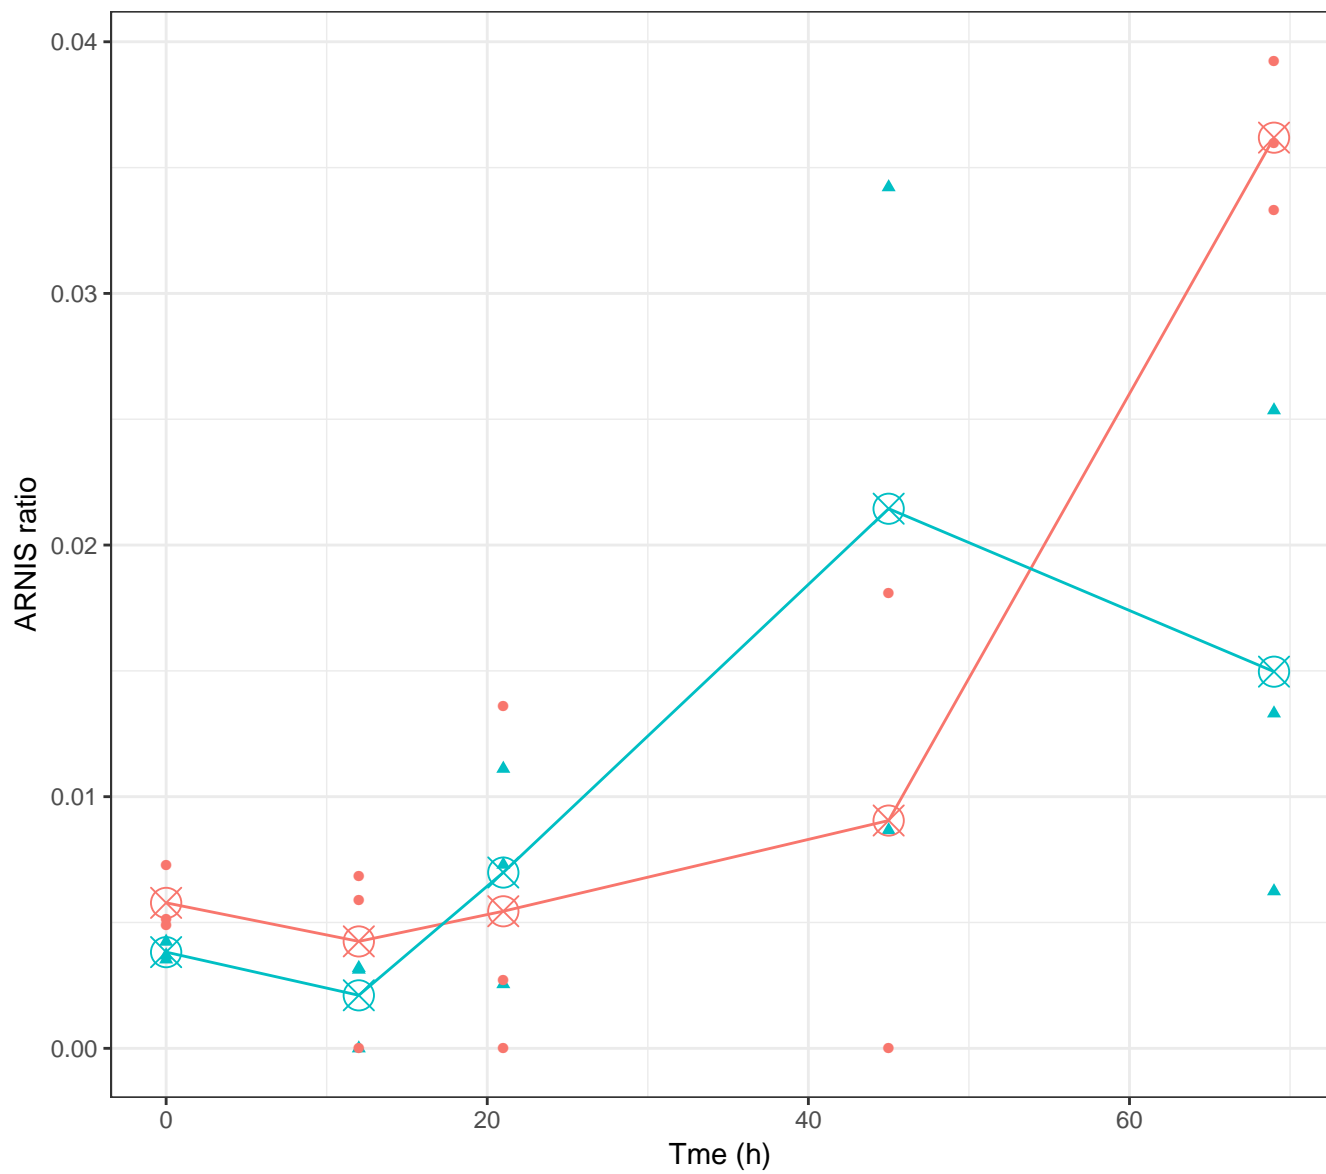

## OTU.386\_Bacteroidetes\_Saprospiraceae

Treatment Control Filtered-1micron

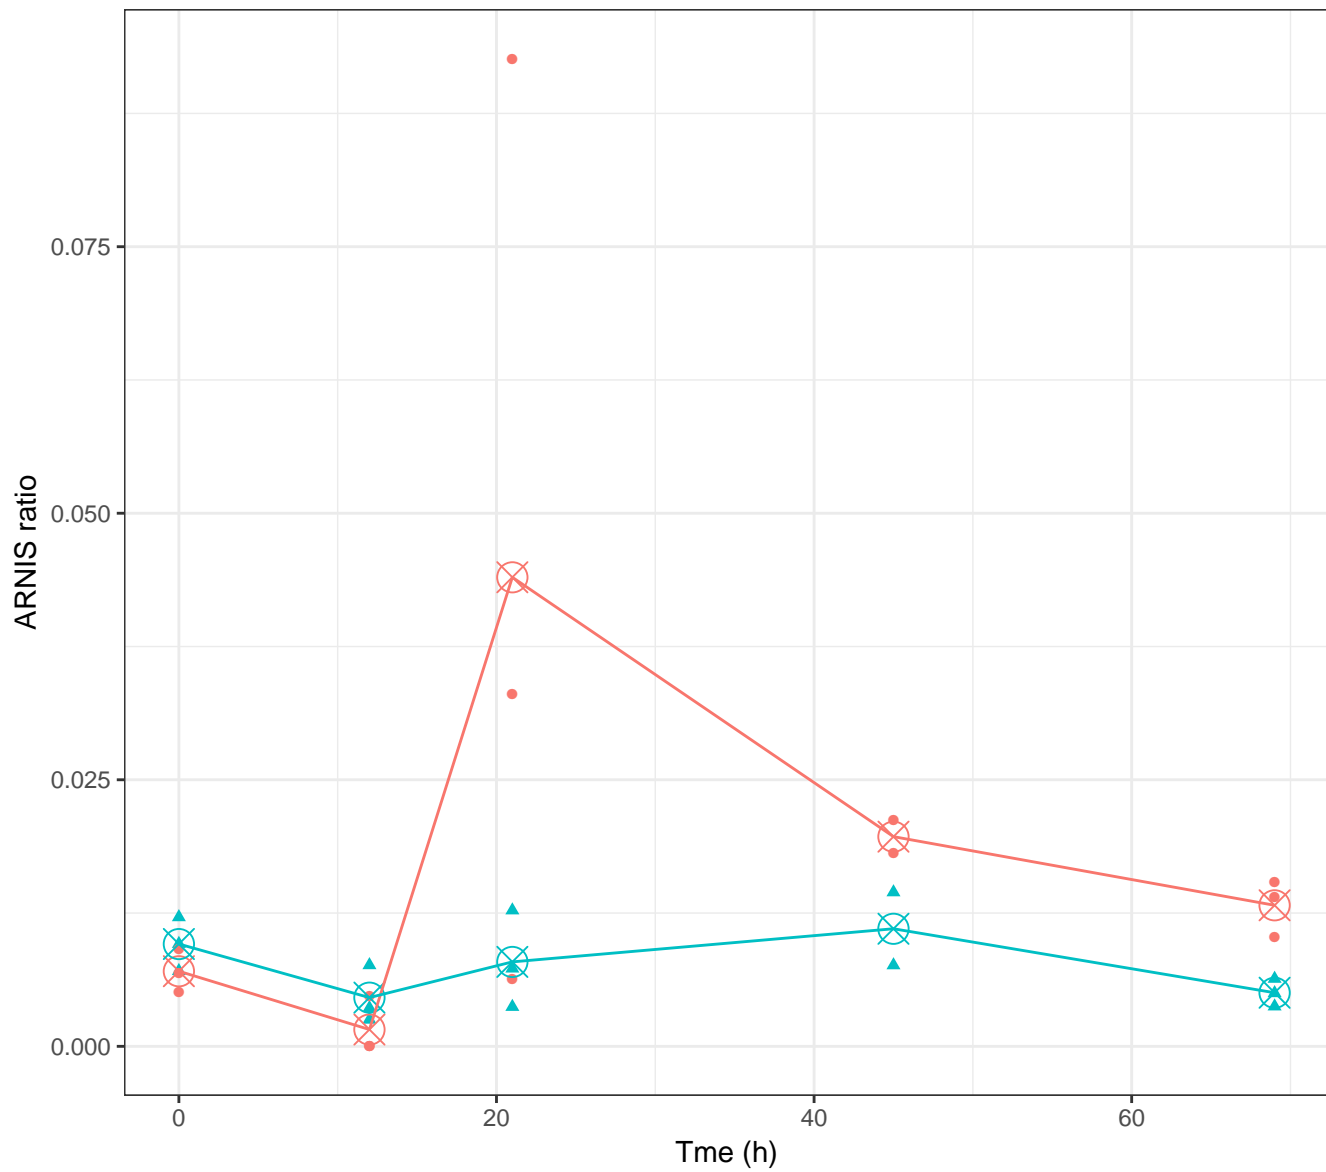

# OTU.407\_Bacteroidetes\_NS9\_marine\_group

Treatment ⊗ Control ⊗ Filtered-1micron

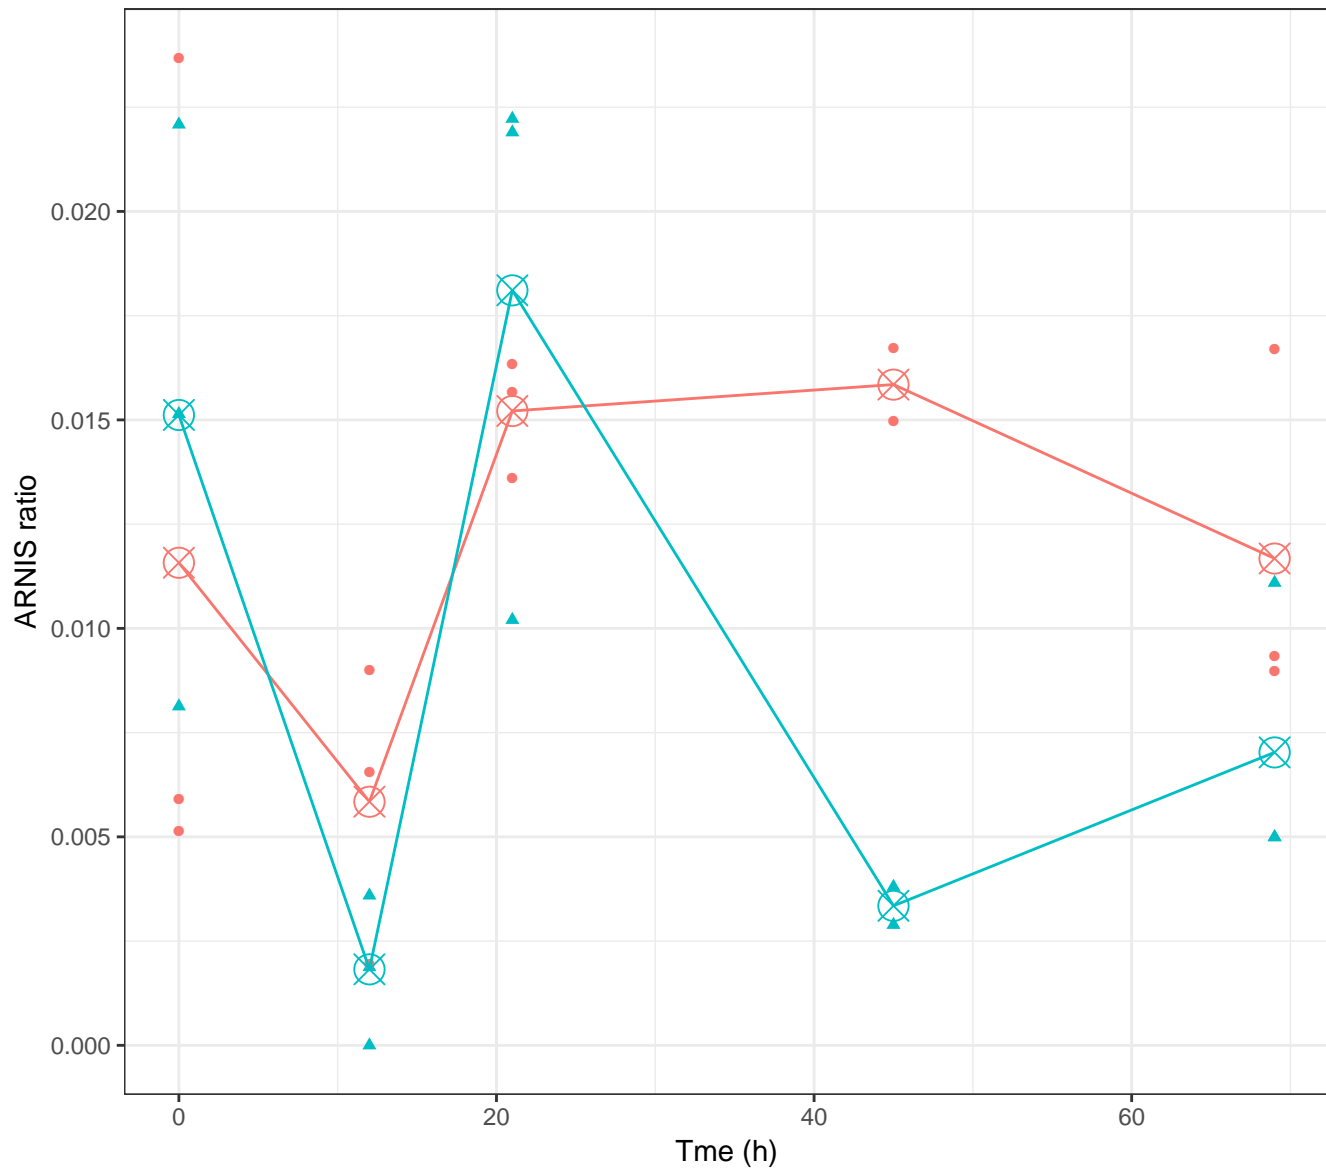

## OTU.426\_Bacteroidetes\_NS11.12\_marine\_group

Treatment  Control  Filtered-1micron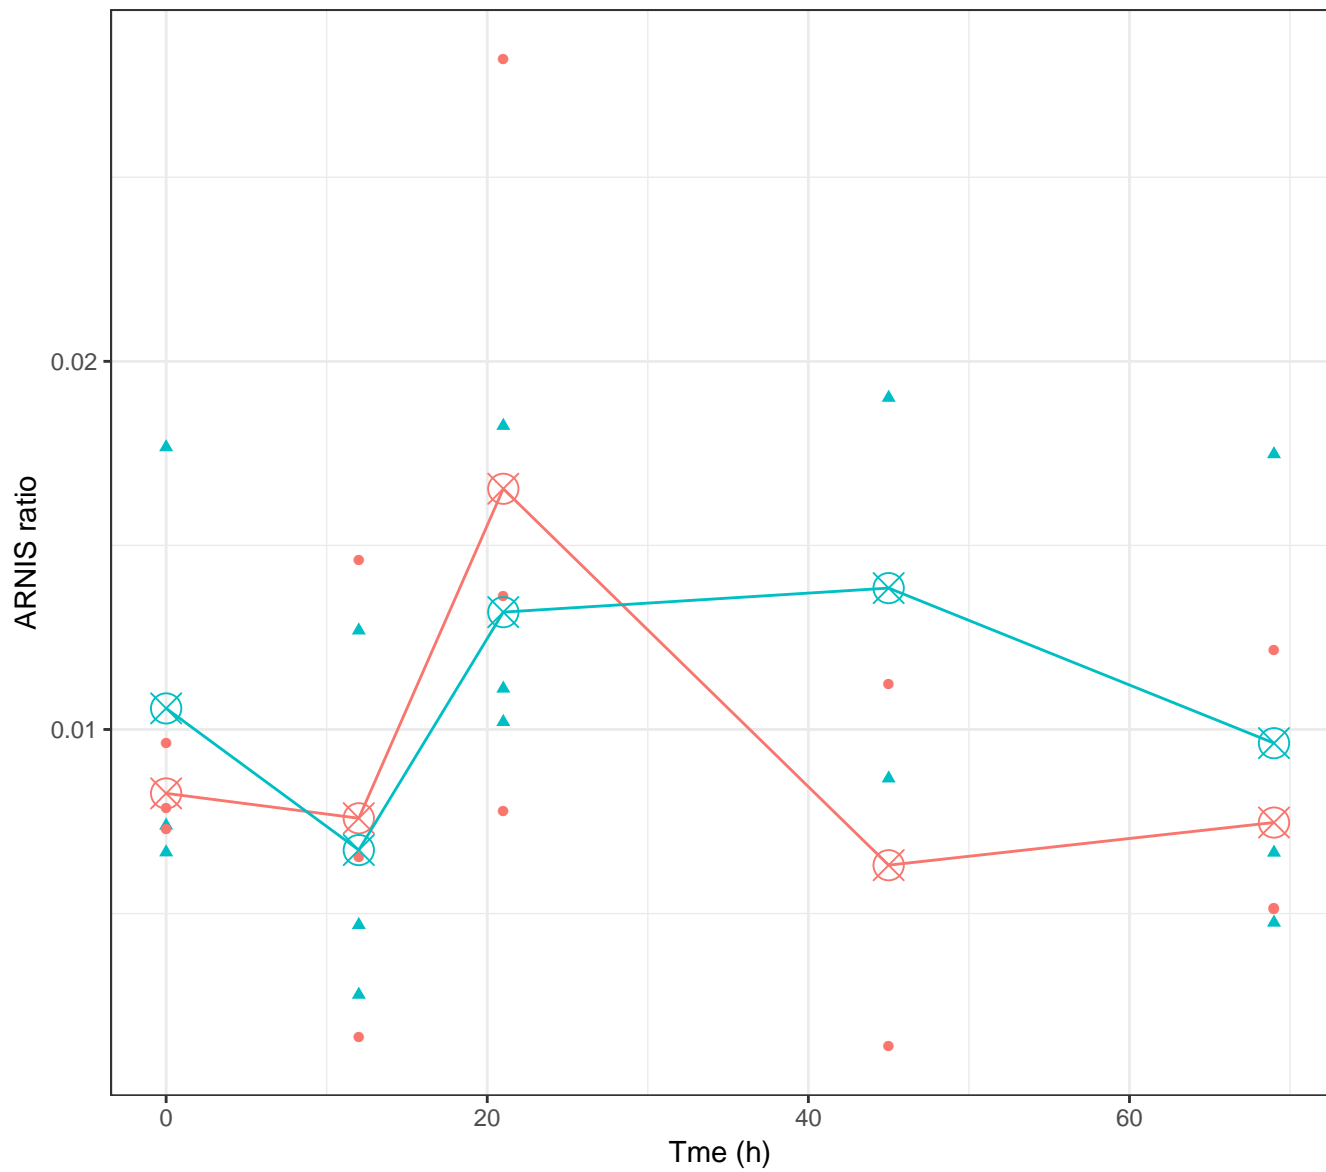

# OTU.416\_Gemmatimonadetes\_Gemmatimonas

Treatment Control Filtered-1micron

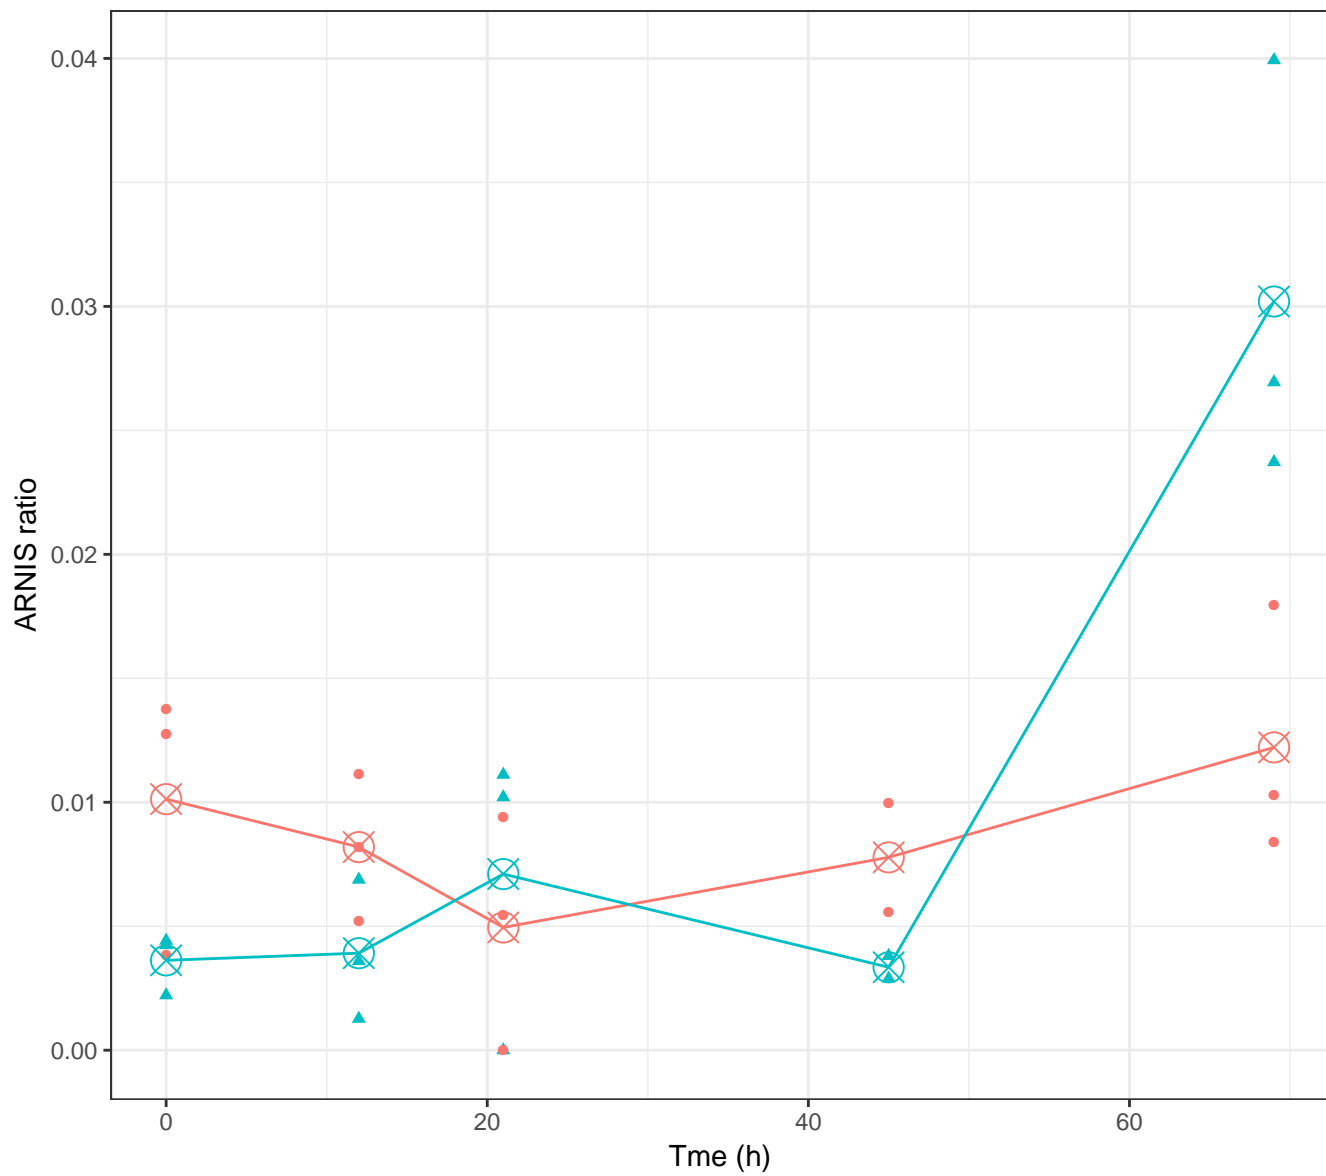

## OTU.414\_Planctomycetes\_Rhodopirellula

Treatment  Control  Filtered-1micron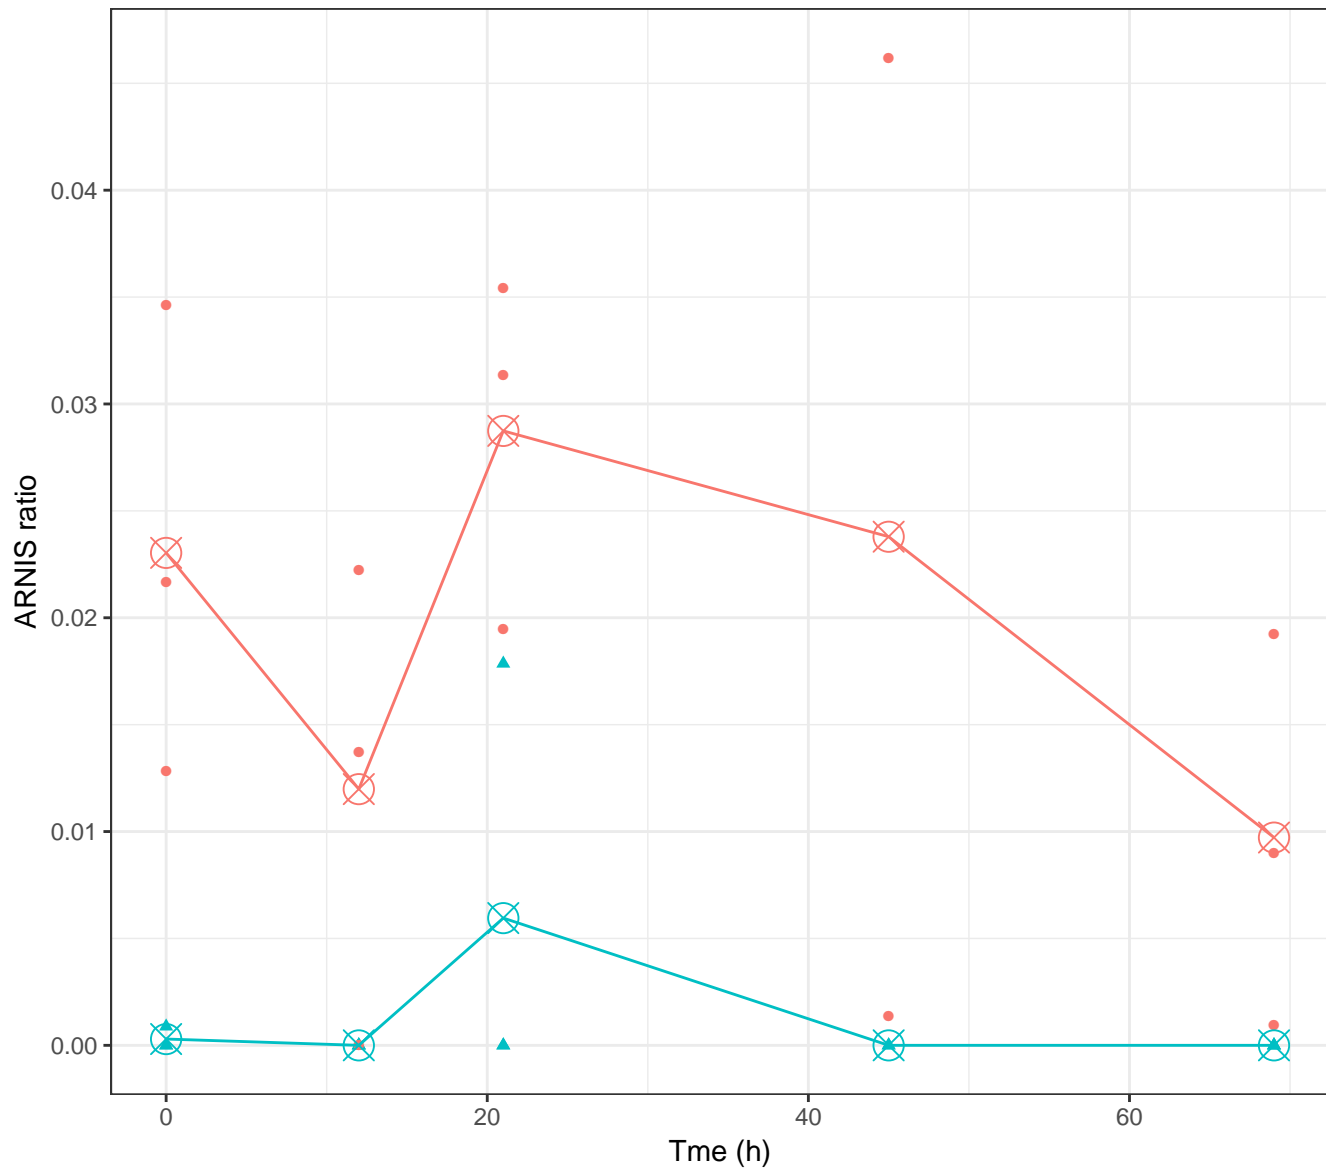

# OTU.417\_Bacteroidetes\_Flavobacterium

Treatment Control Filtered-1micron

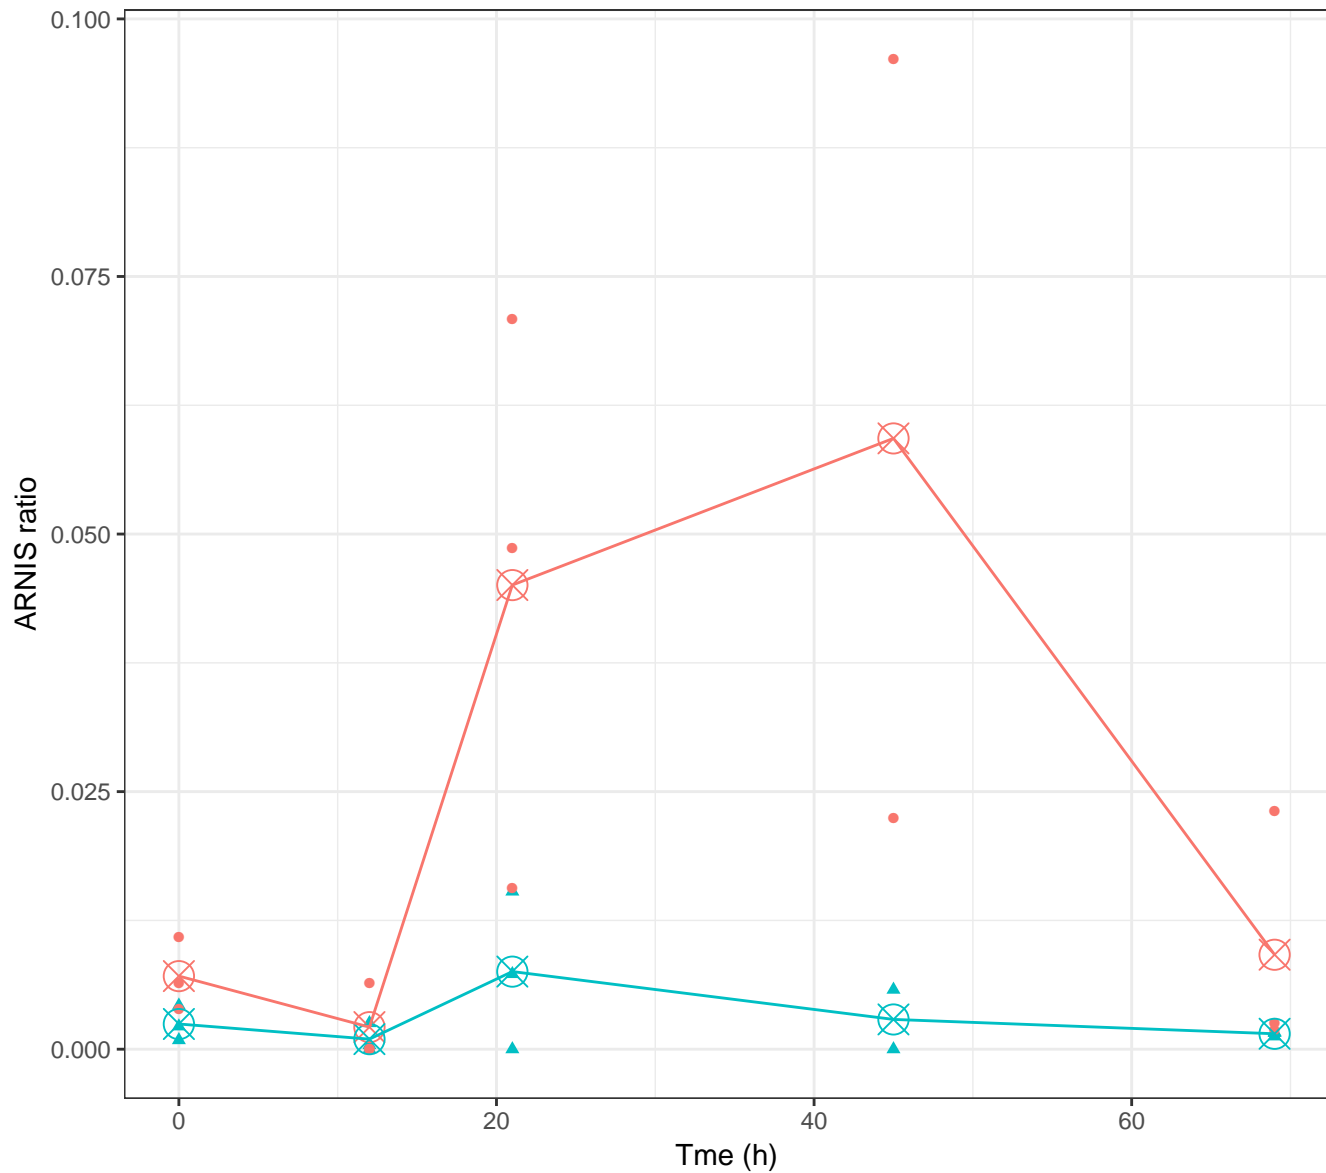



## OTU.443\_Bacteroidetes\_Chitinophagaceae

Treatment Control Filtered-1micron

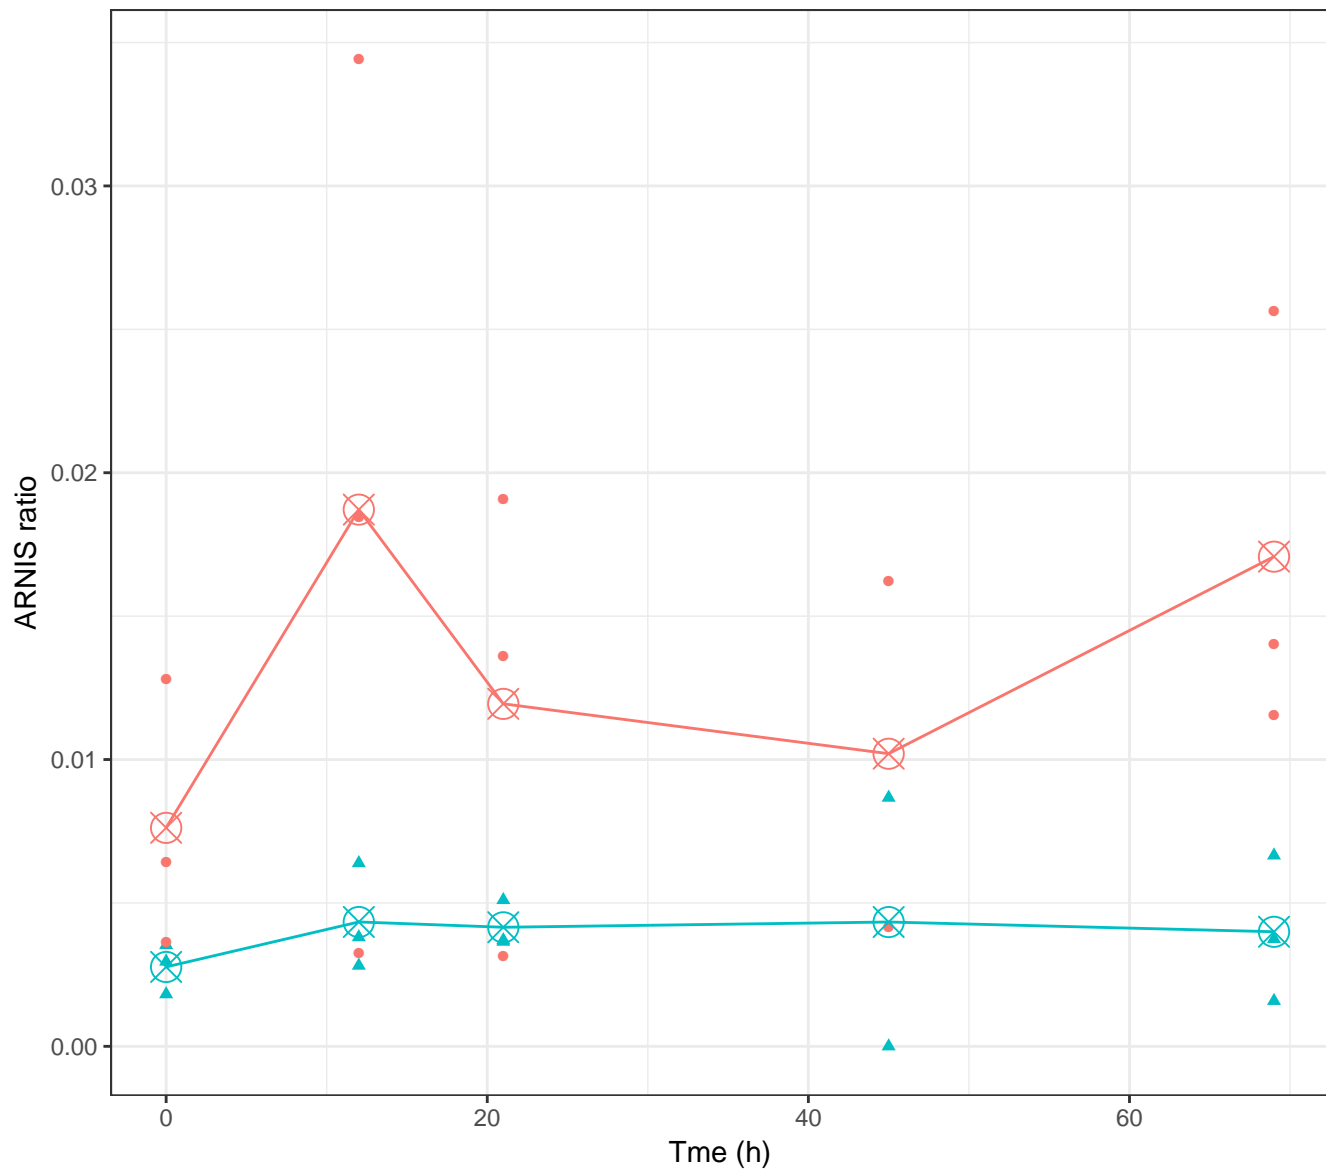

# OTU.400\_Bacteroidetes\_Chitinophagaceae

Treatment Control Filtered-1micron

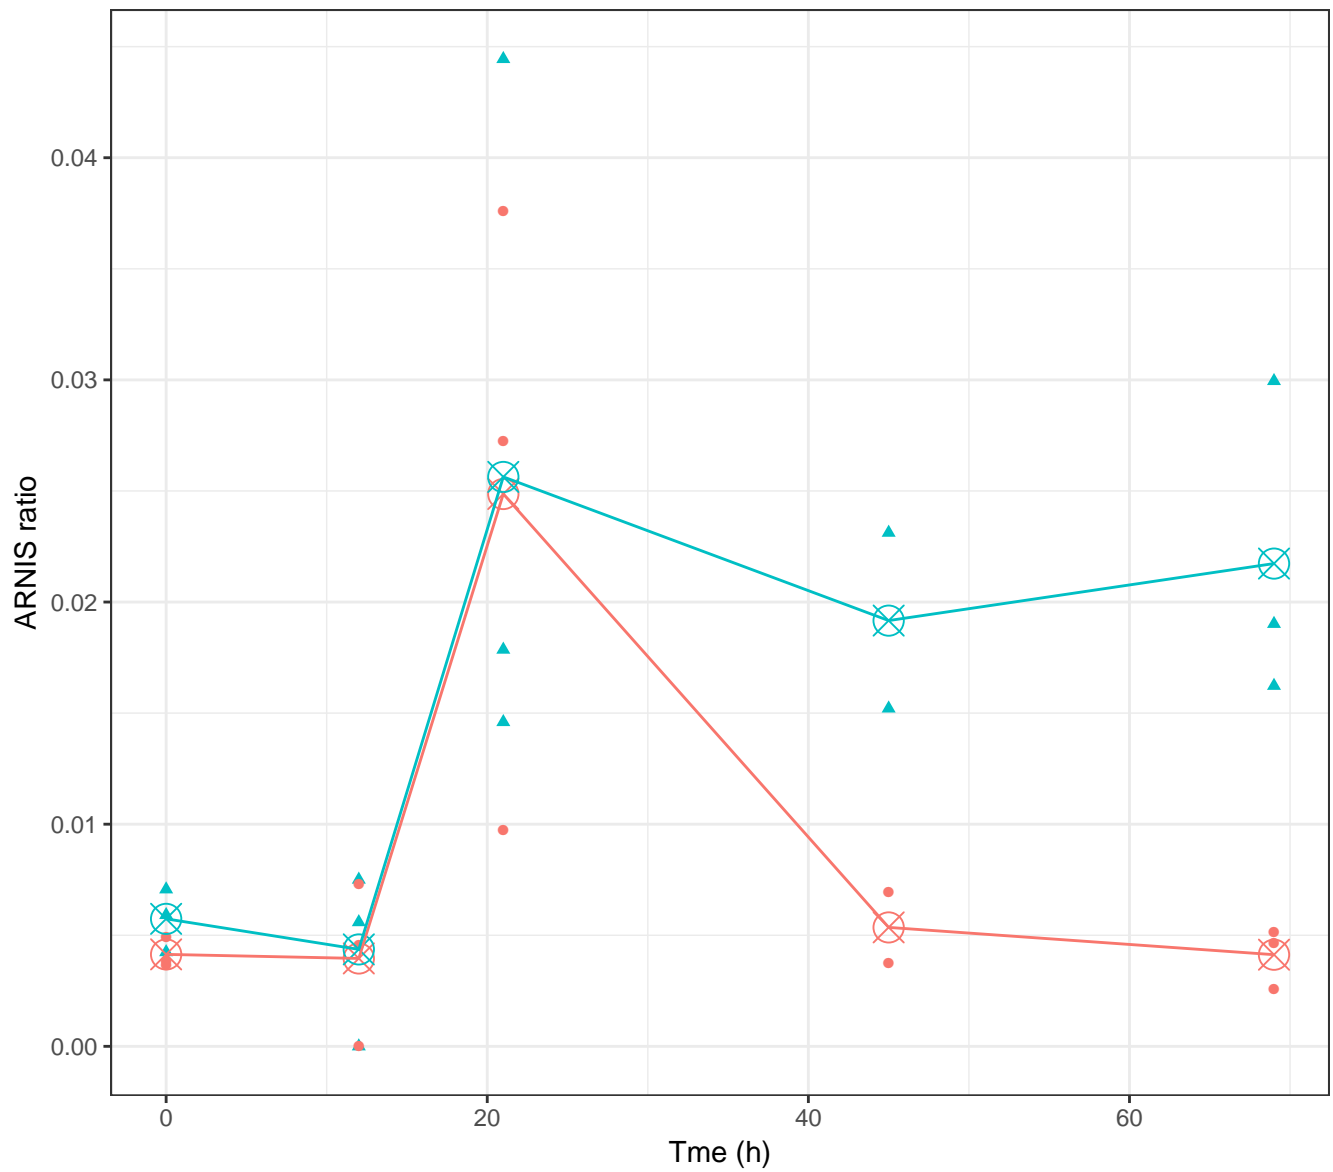

## OTU.446\_Bacteroidetes\_Cytophagaceae

Treatment Control Filtered-1micron

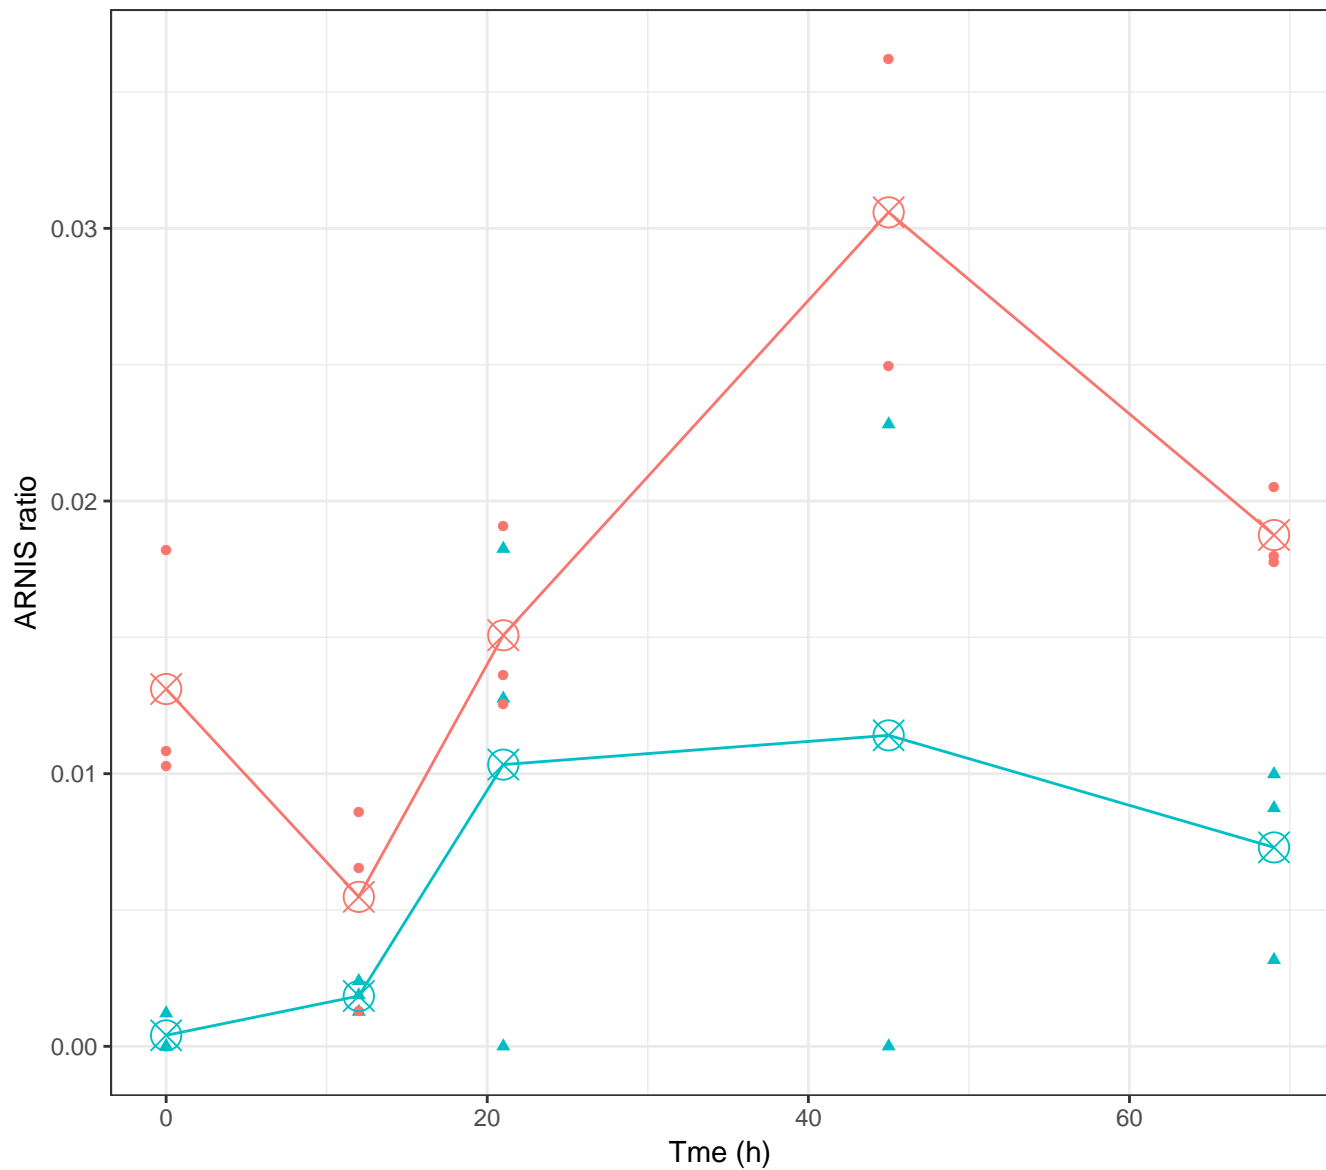

# OTU.672\_Bacteroidetes\_NS9\_marine\_group

Treatment ⊗ Control ⊗ Filtered-1micron

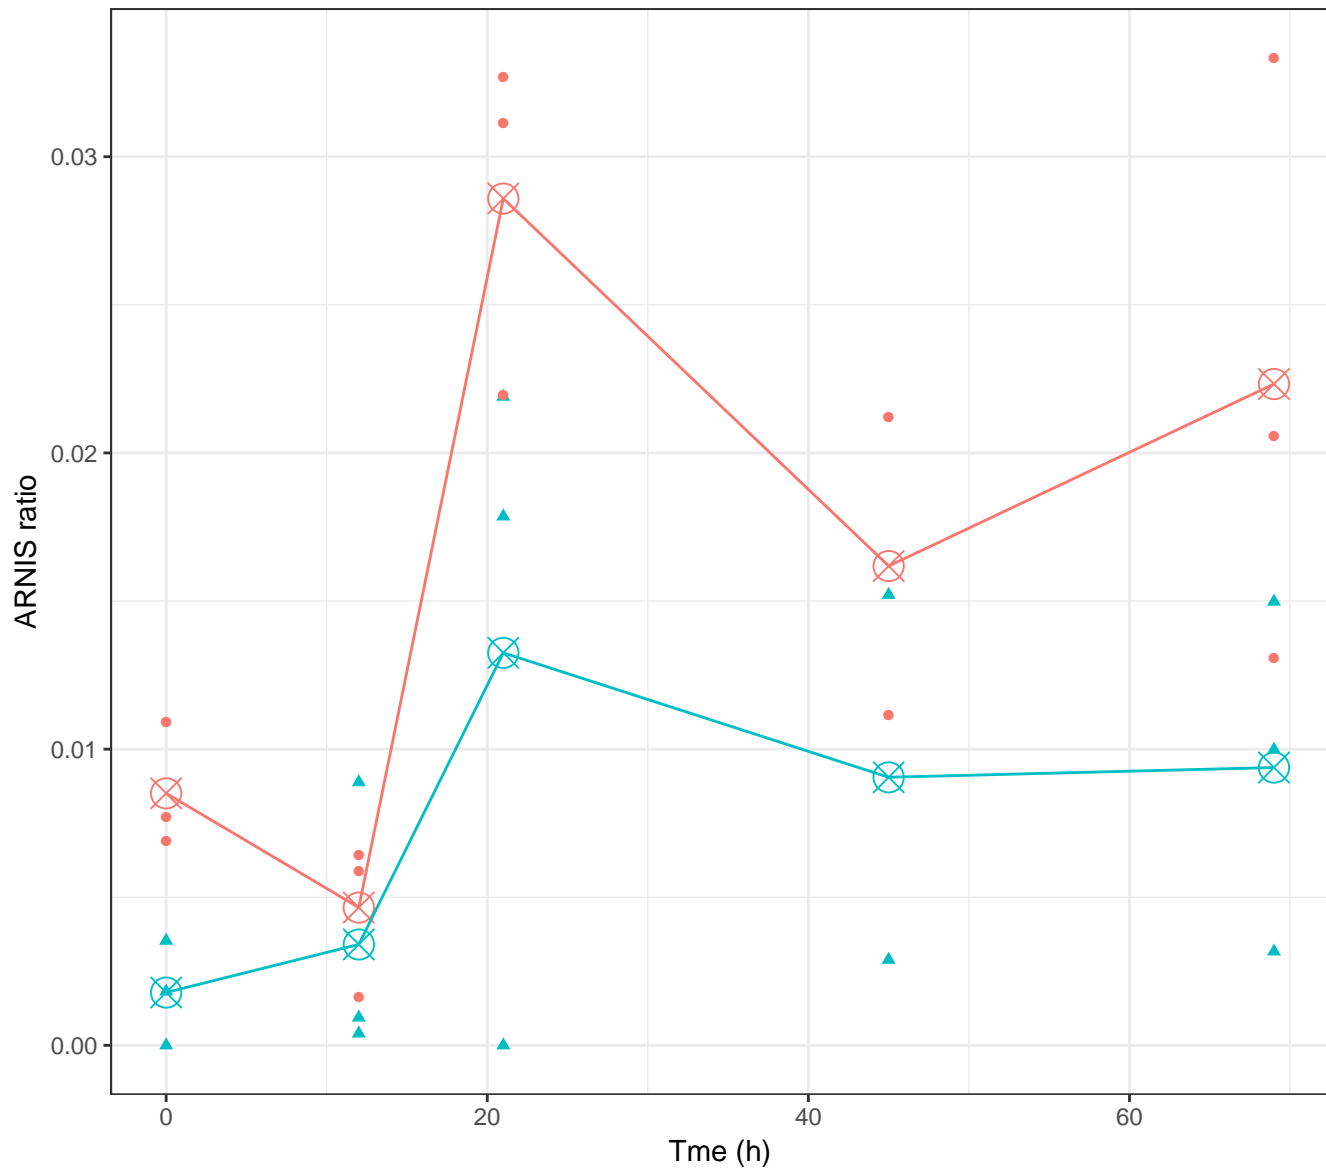

# OTU.22\_Actinobacteria\_Candidatus\_Planktoluna

Treatment Control Filtered-1micron

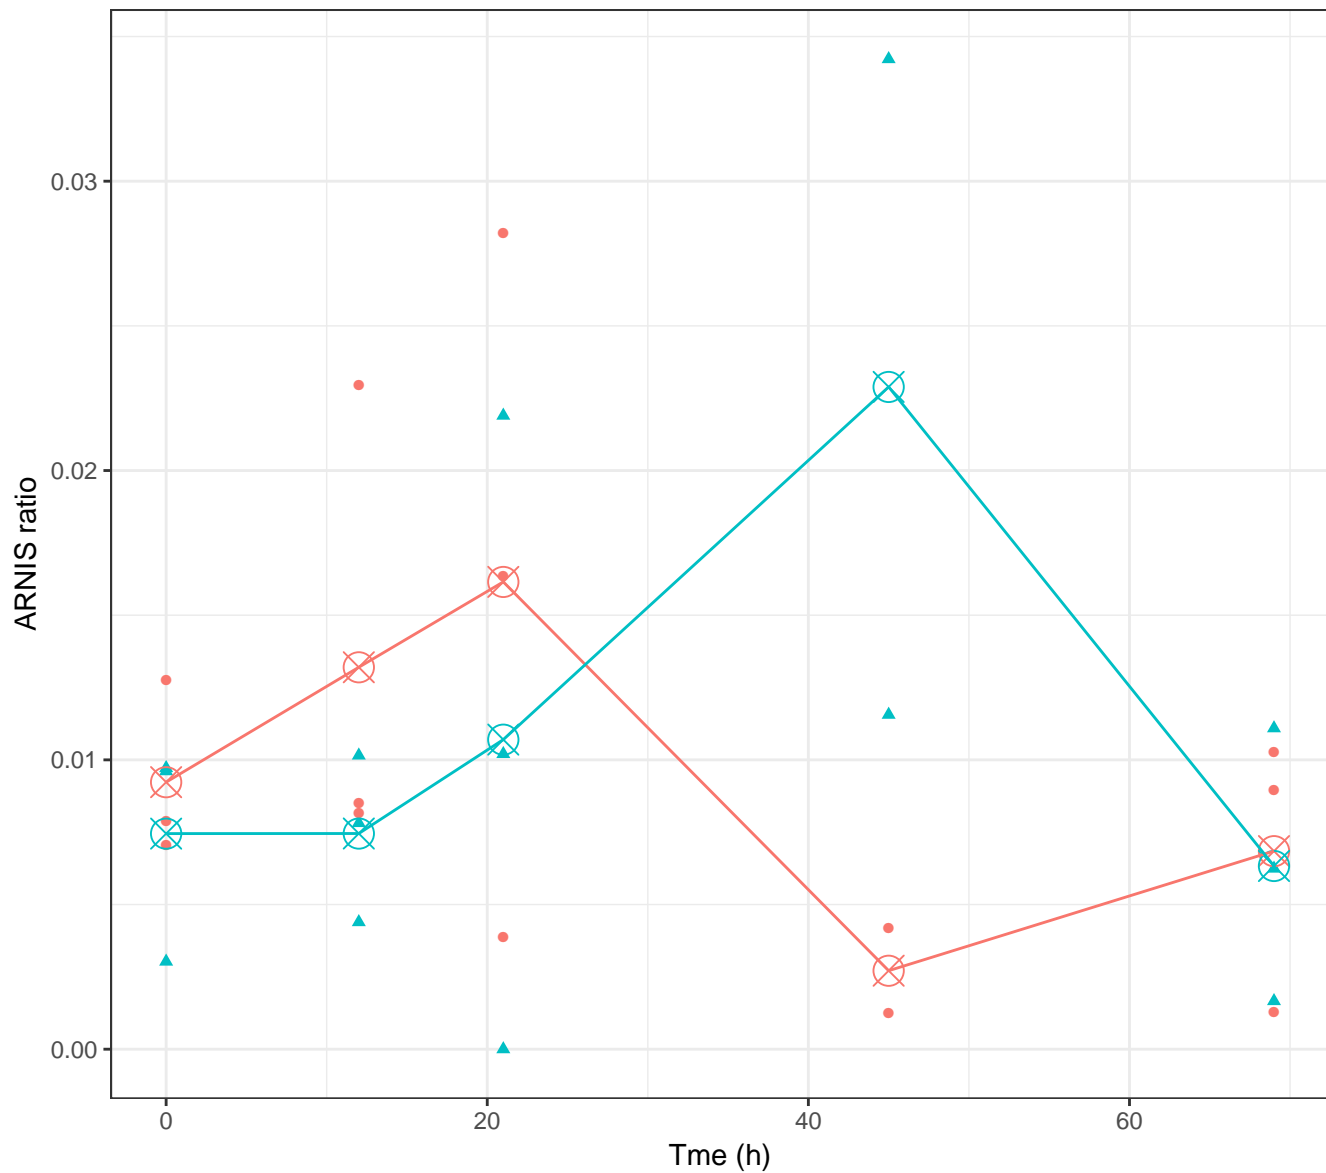

# OTU.418\_Firmicutes\_Lactococcus

Treatment ⊗ Control ⊗ Filtered-1micron

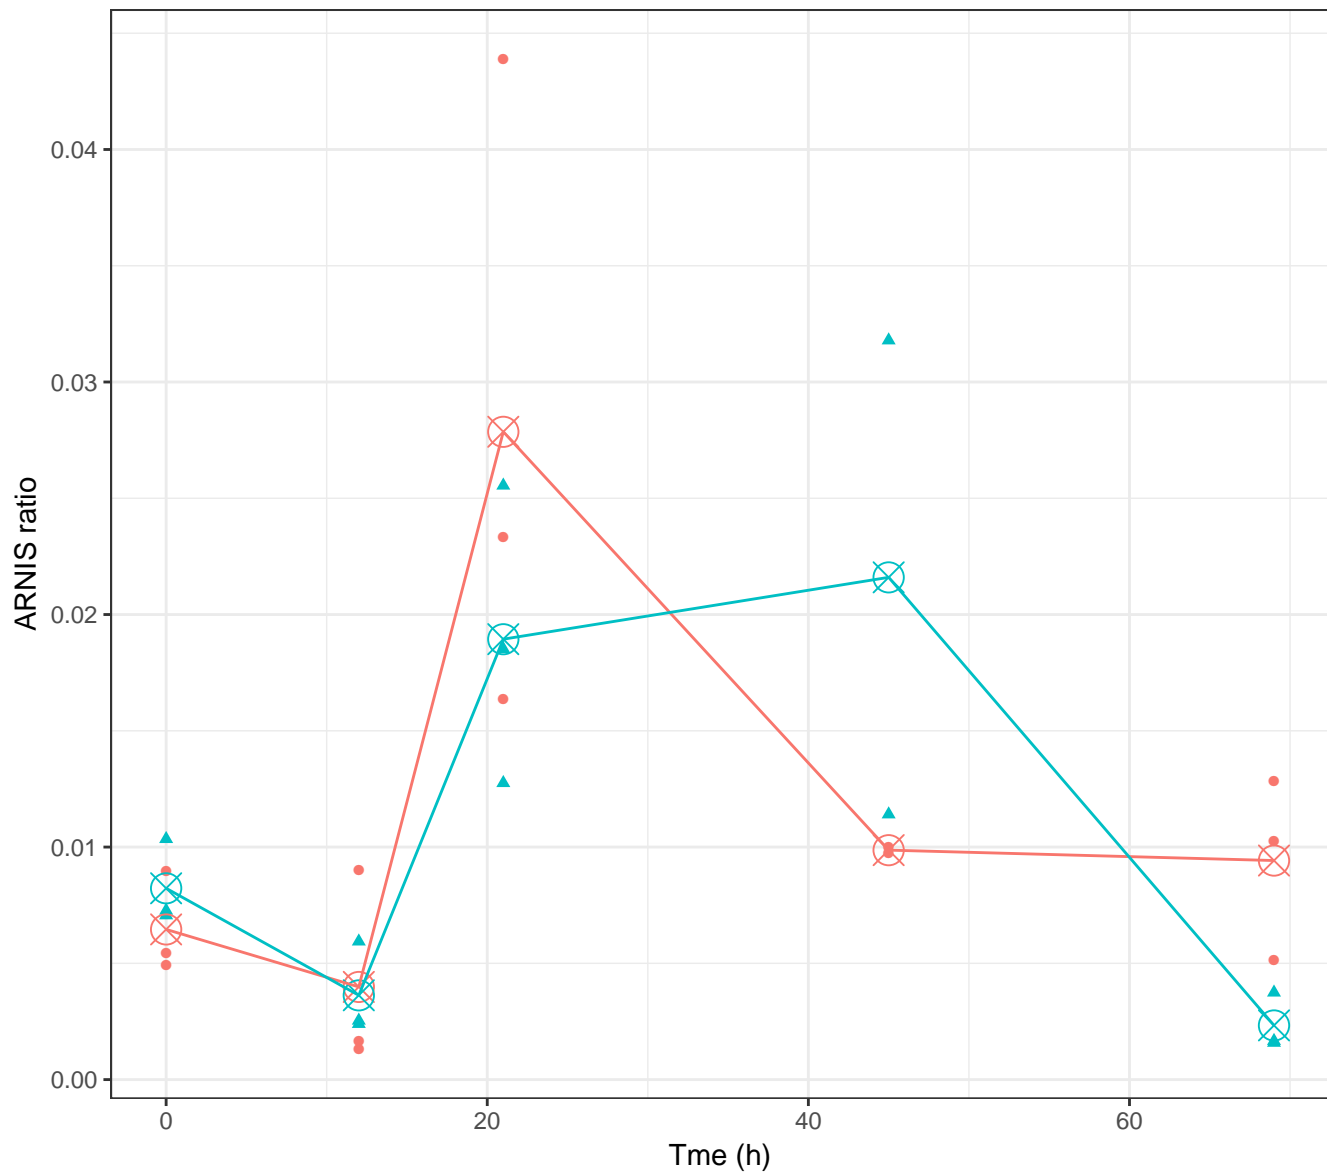

# OTU.779\_Alphaproteobacteria\_Meganema

Treatment Control Filtered-1micron

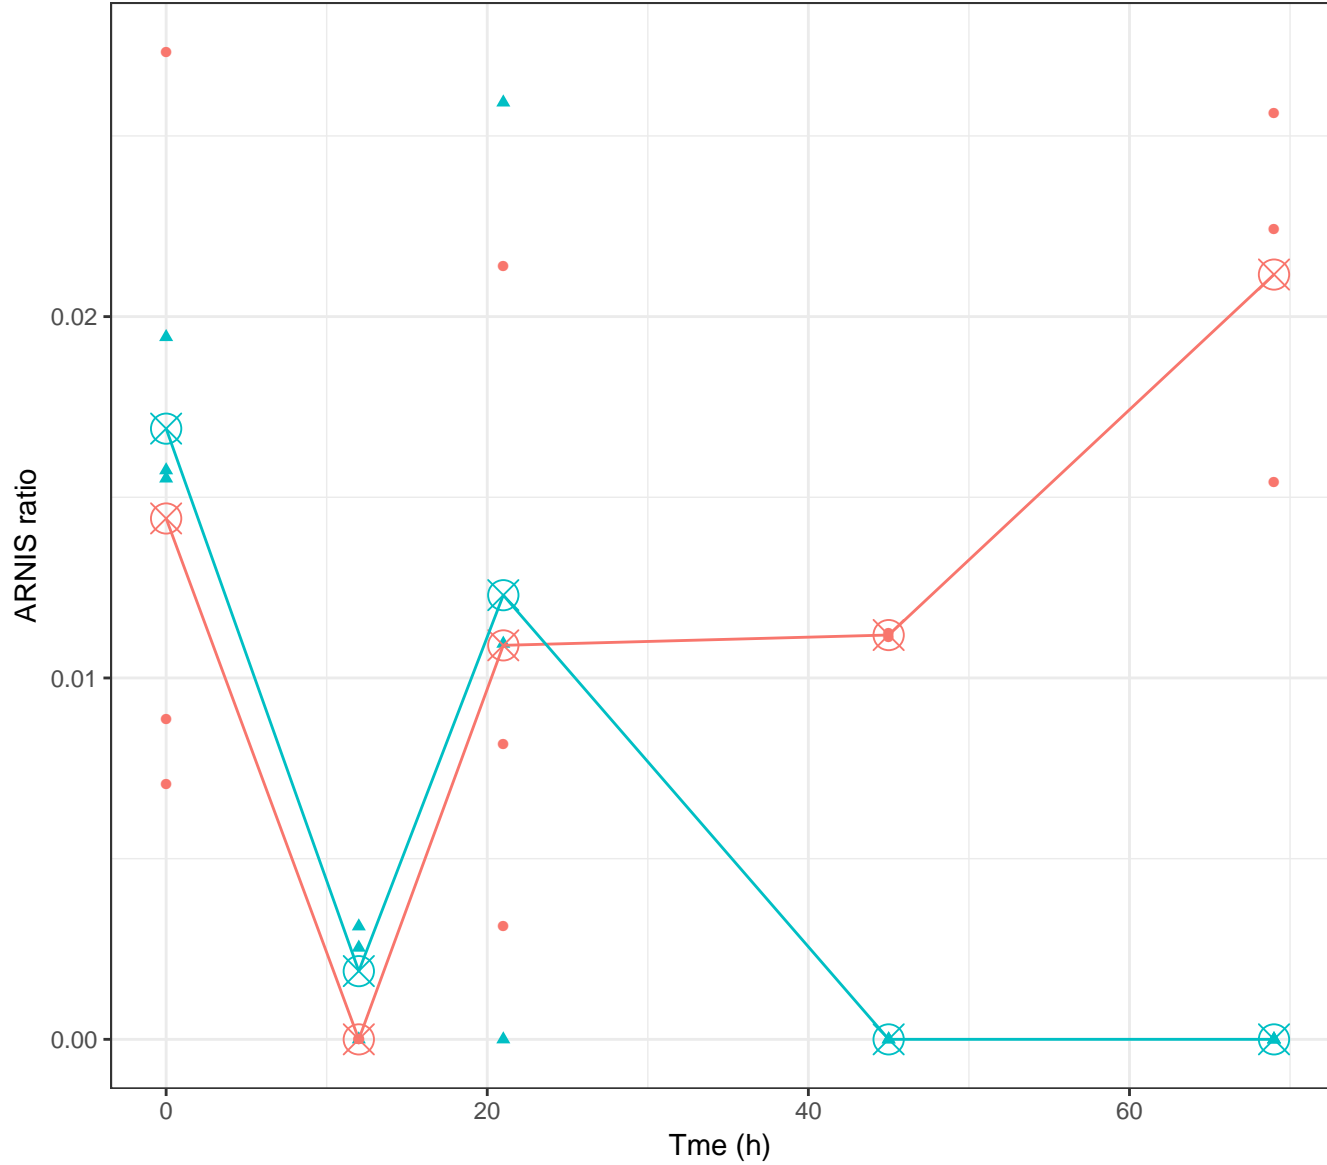

# OTU.433\_Alphaproteobacteria\_Acetobacteraceae

Treatment Control Filtered-1micron

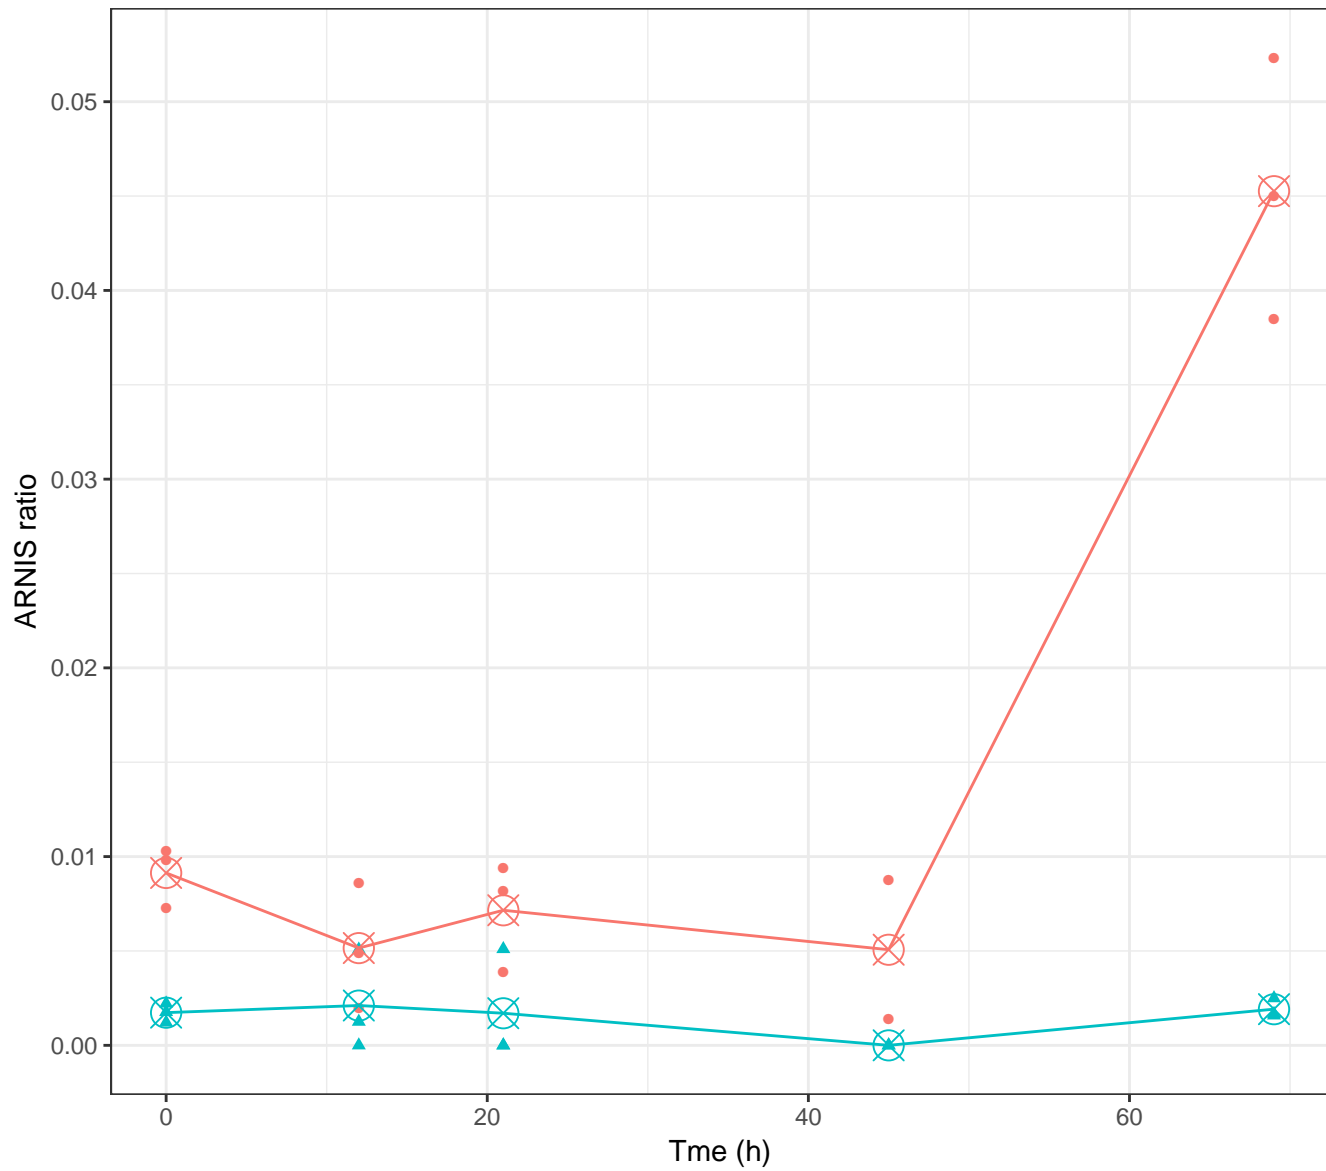



# OTU.413\_Gammaproteobacteria\_Legionella

Treatment Control Filtered-1micron

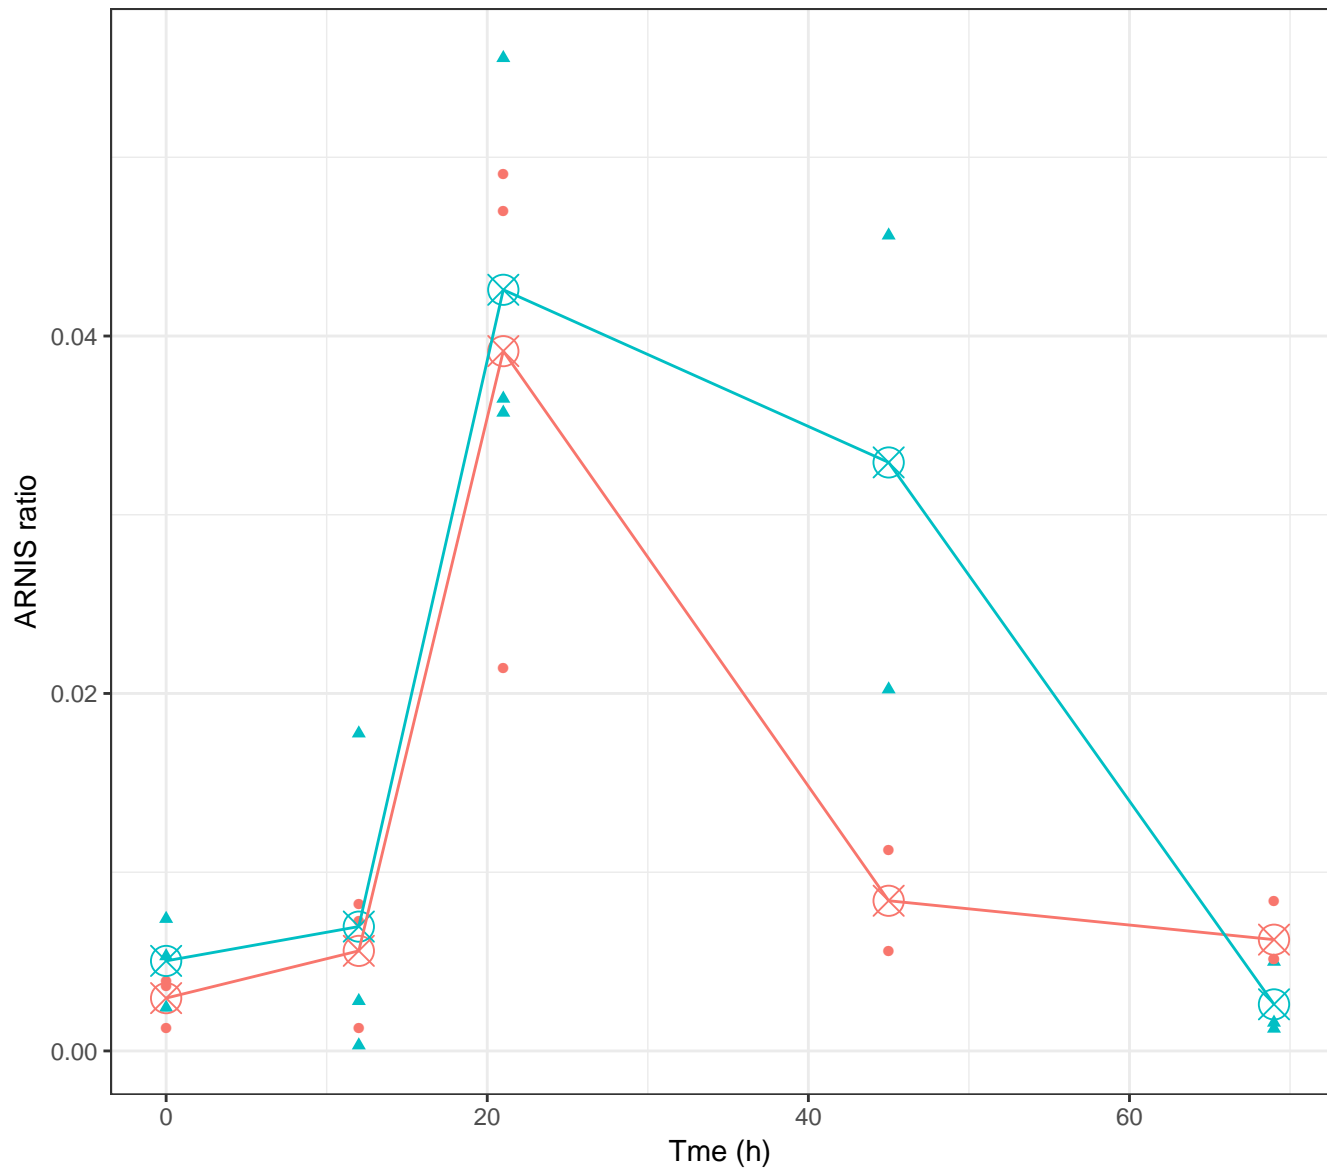

# OTU.1185\_Actinobacteria\_Microbacteriaceae

Treatment Control Filtered-1micron

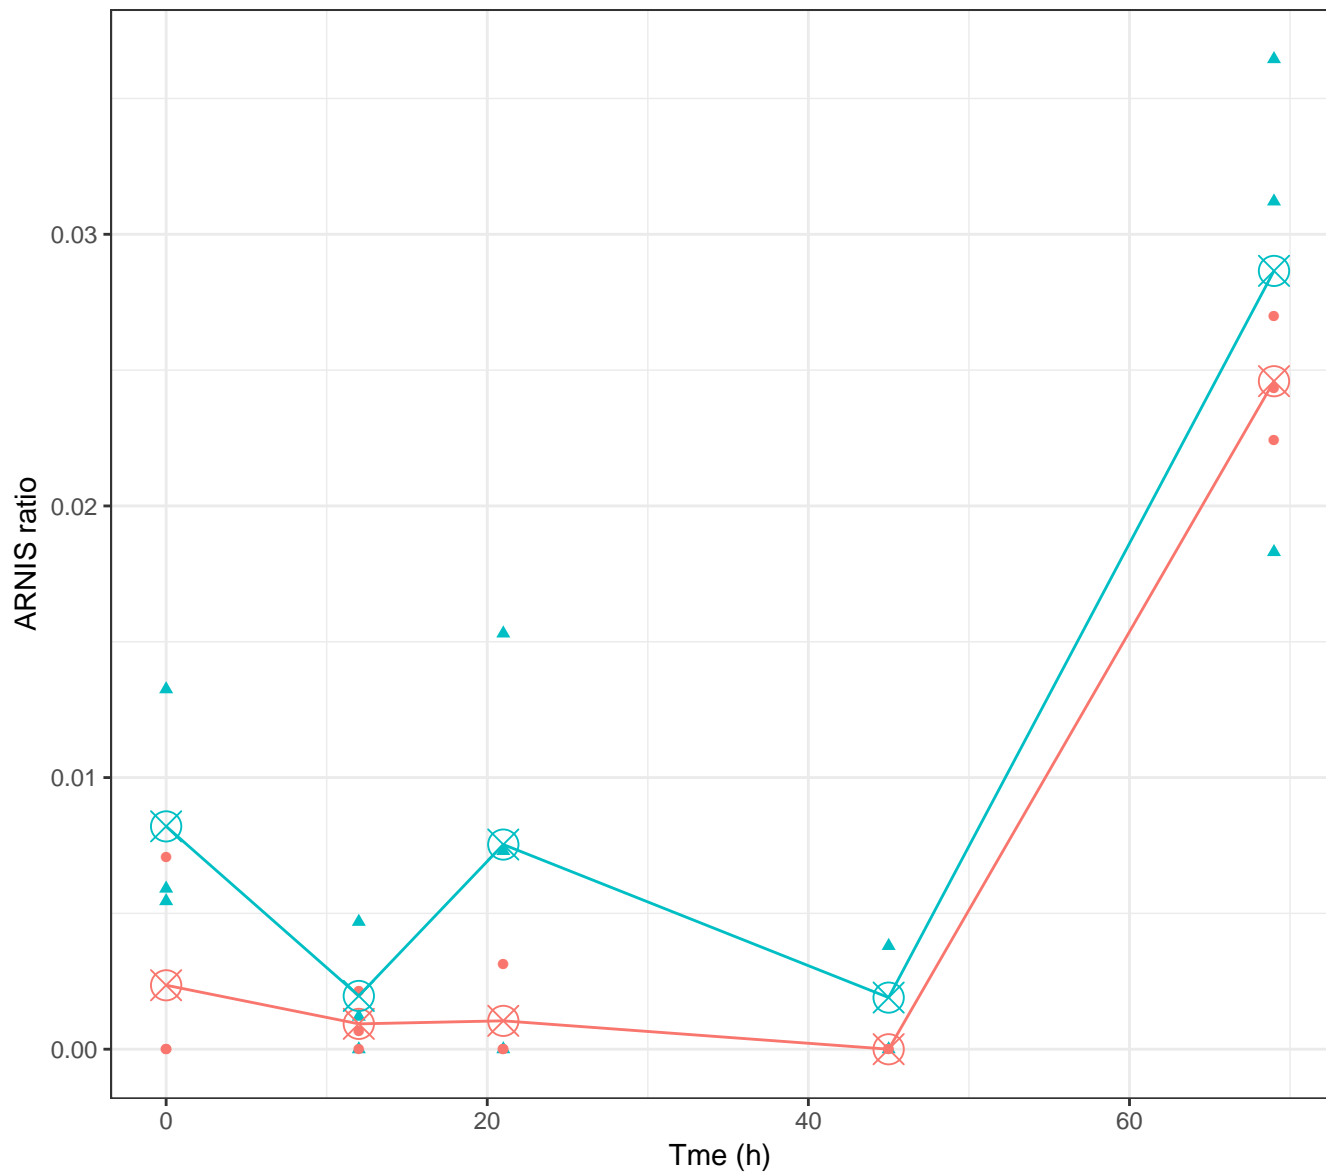

# OTU.437\_Firmicutes\_Paenibacillus

Treatment ⊗ Control ⊗ Filtered-1micron

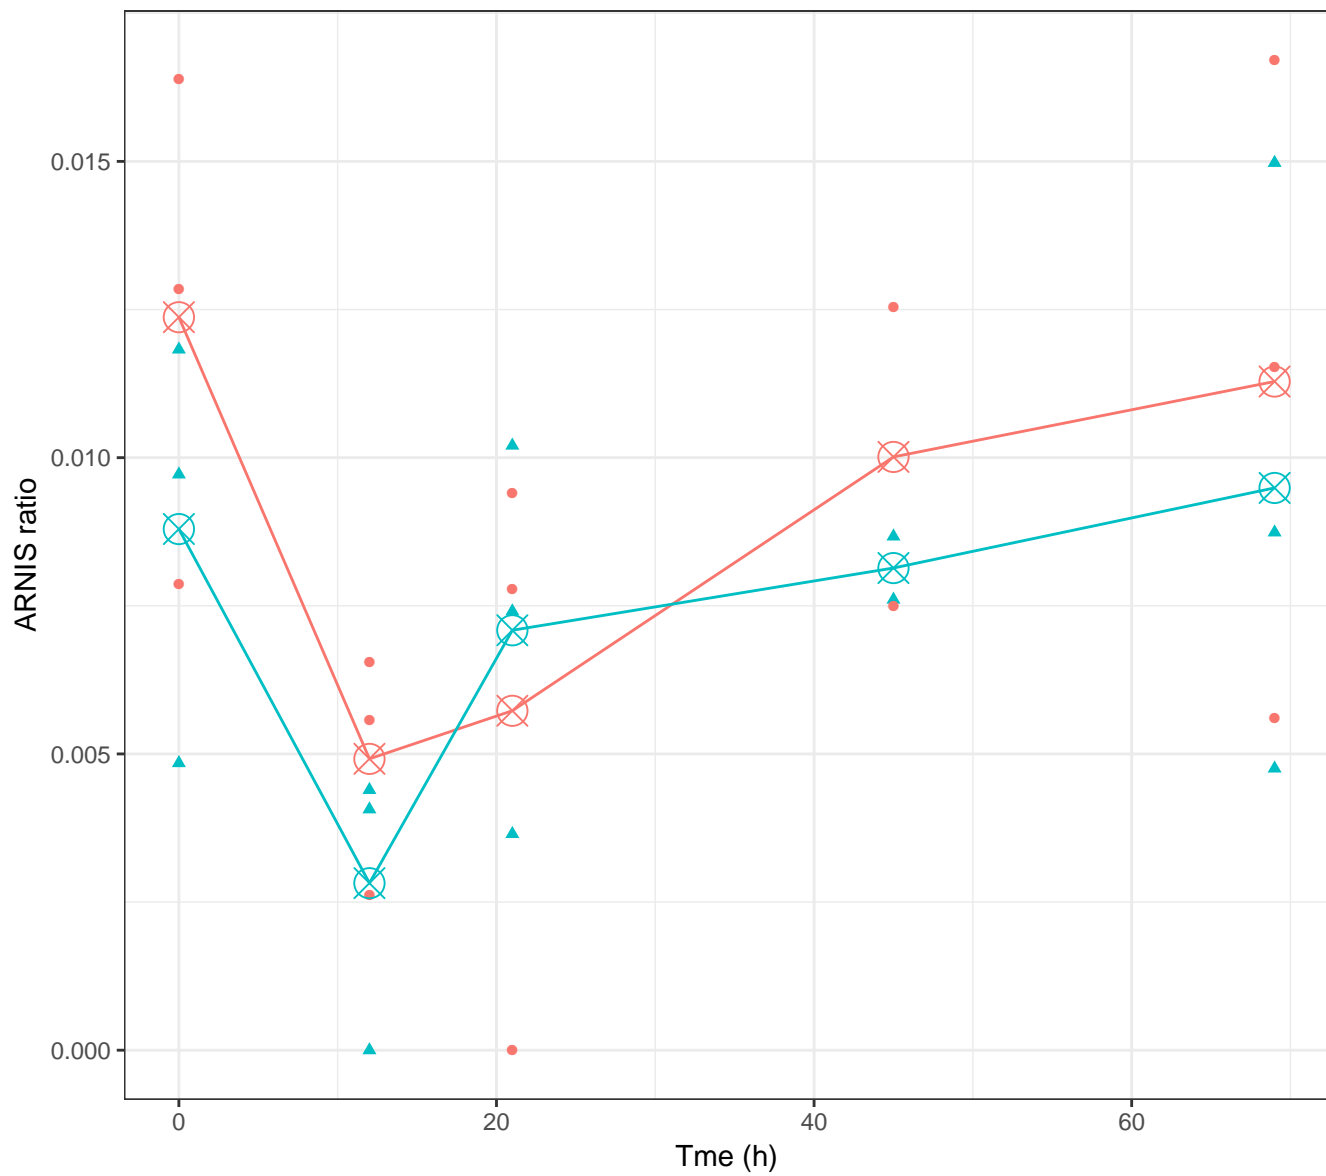

# OTU.449\_Proteobacteria\_TA18

Treatment Control Filtered-1micron

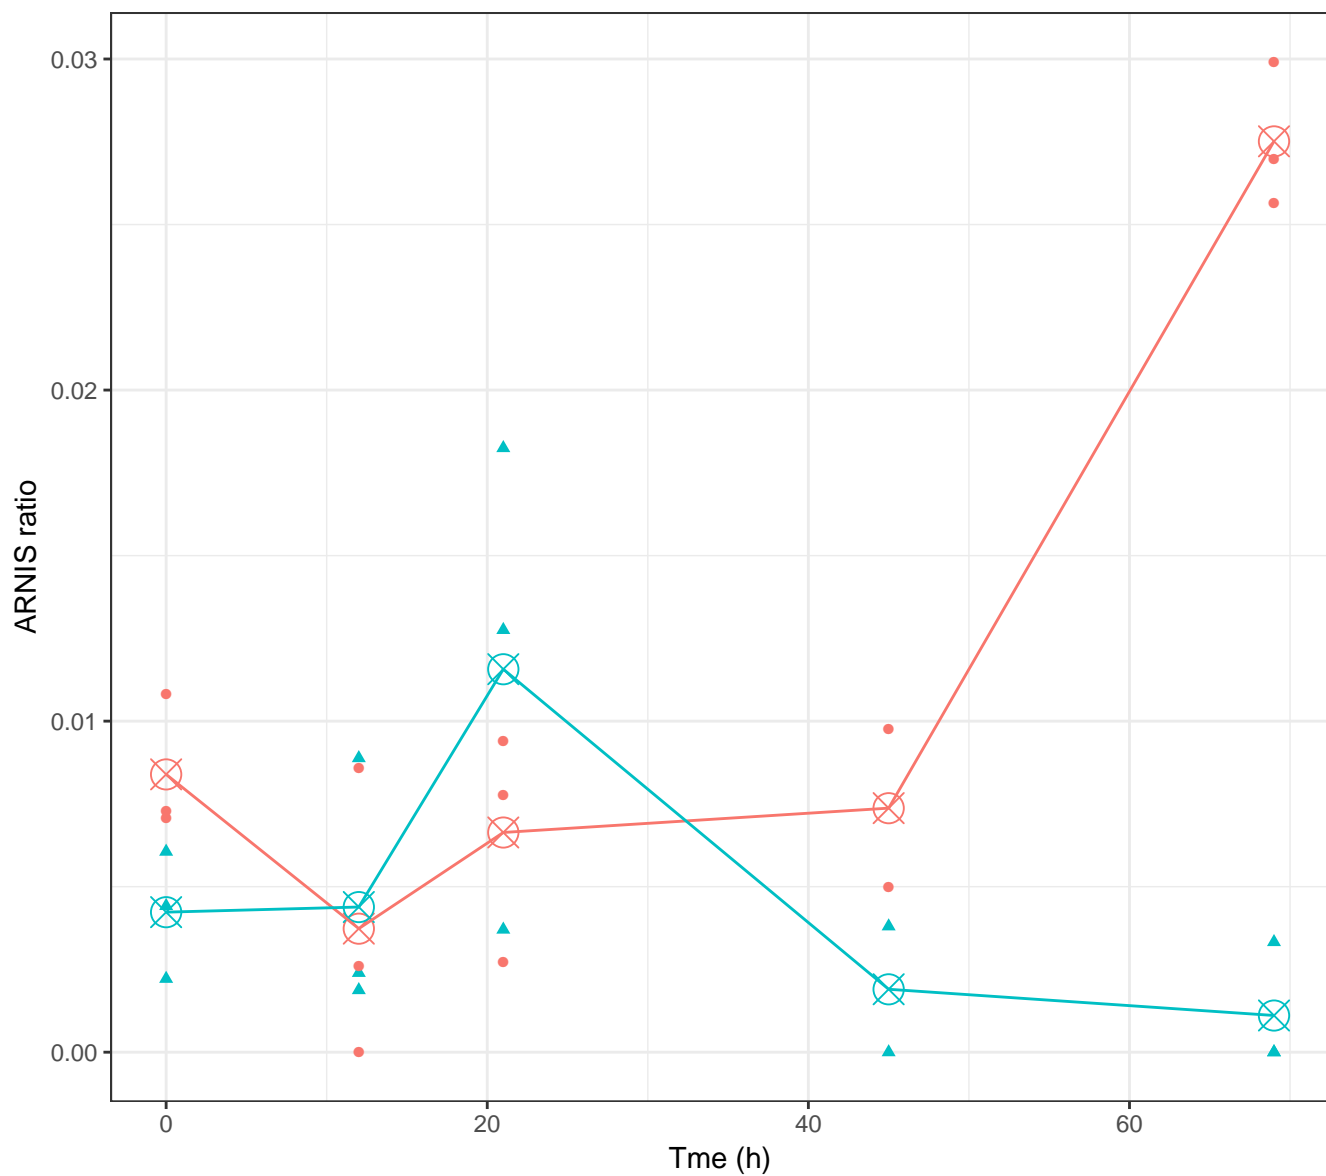

## OTU.1300\_Betaproteobacteria\_Comamonadaceae

Treatment Control Filtered-1micron

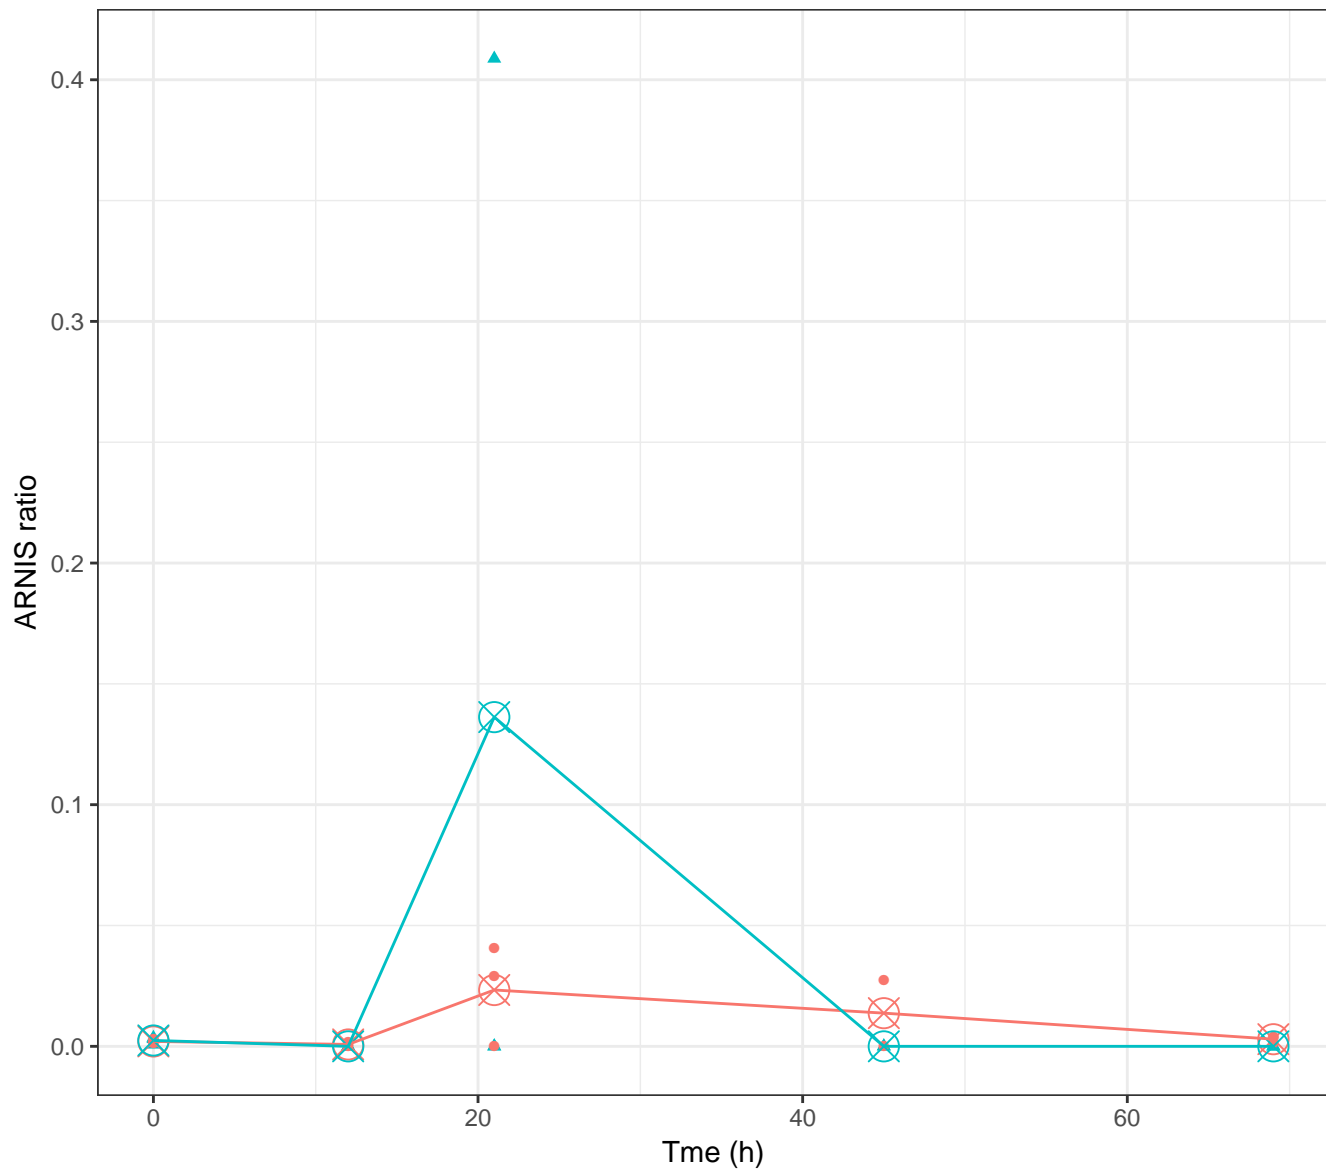

# OTU.501\_Deltaproteobacteria\_Sorangium

Treatment Control Filtered-1micron

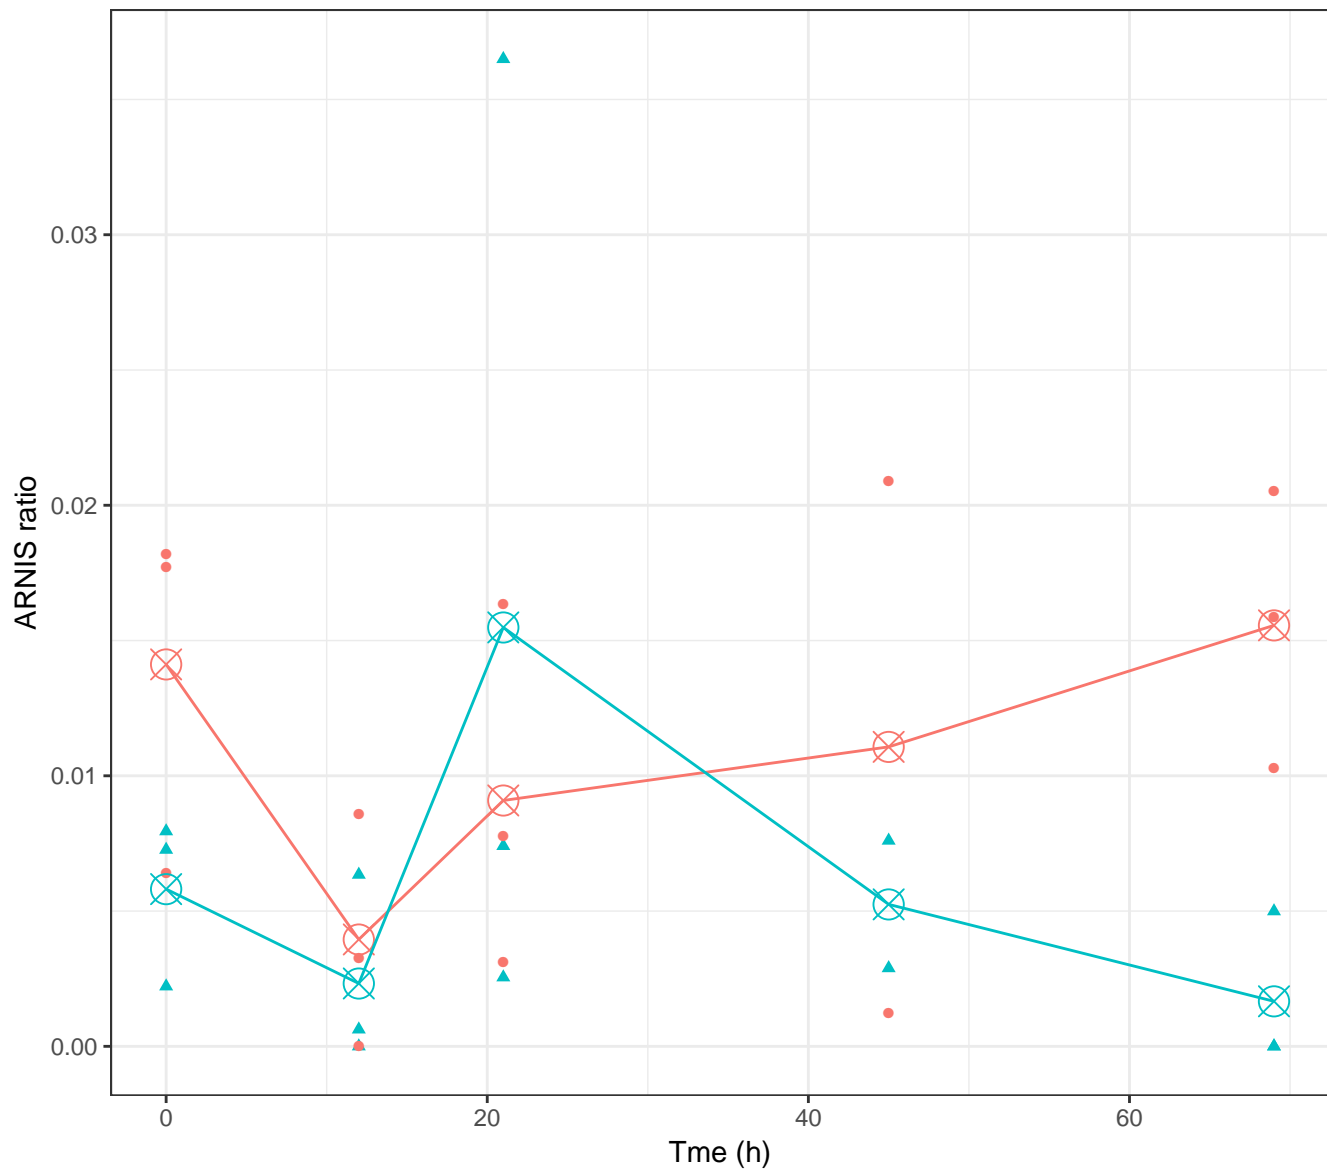

# OTU.327\_Chlamydiae\_Candidatus\_Rhabdochlamydia

Treatment Control Filtered-1micron

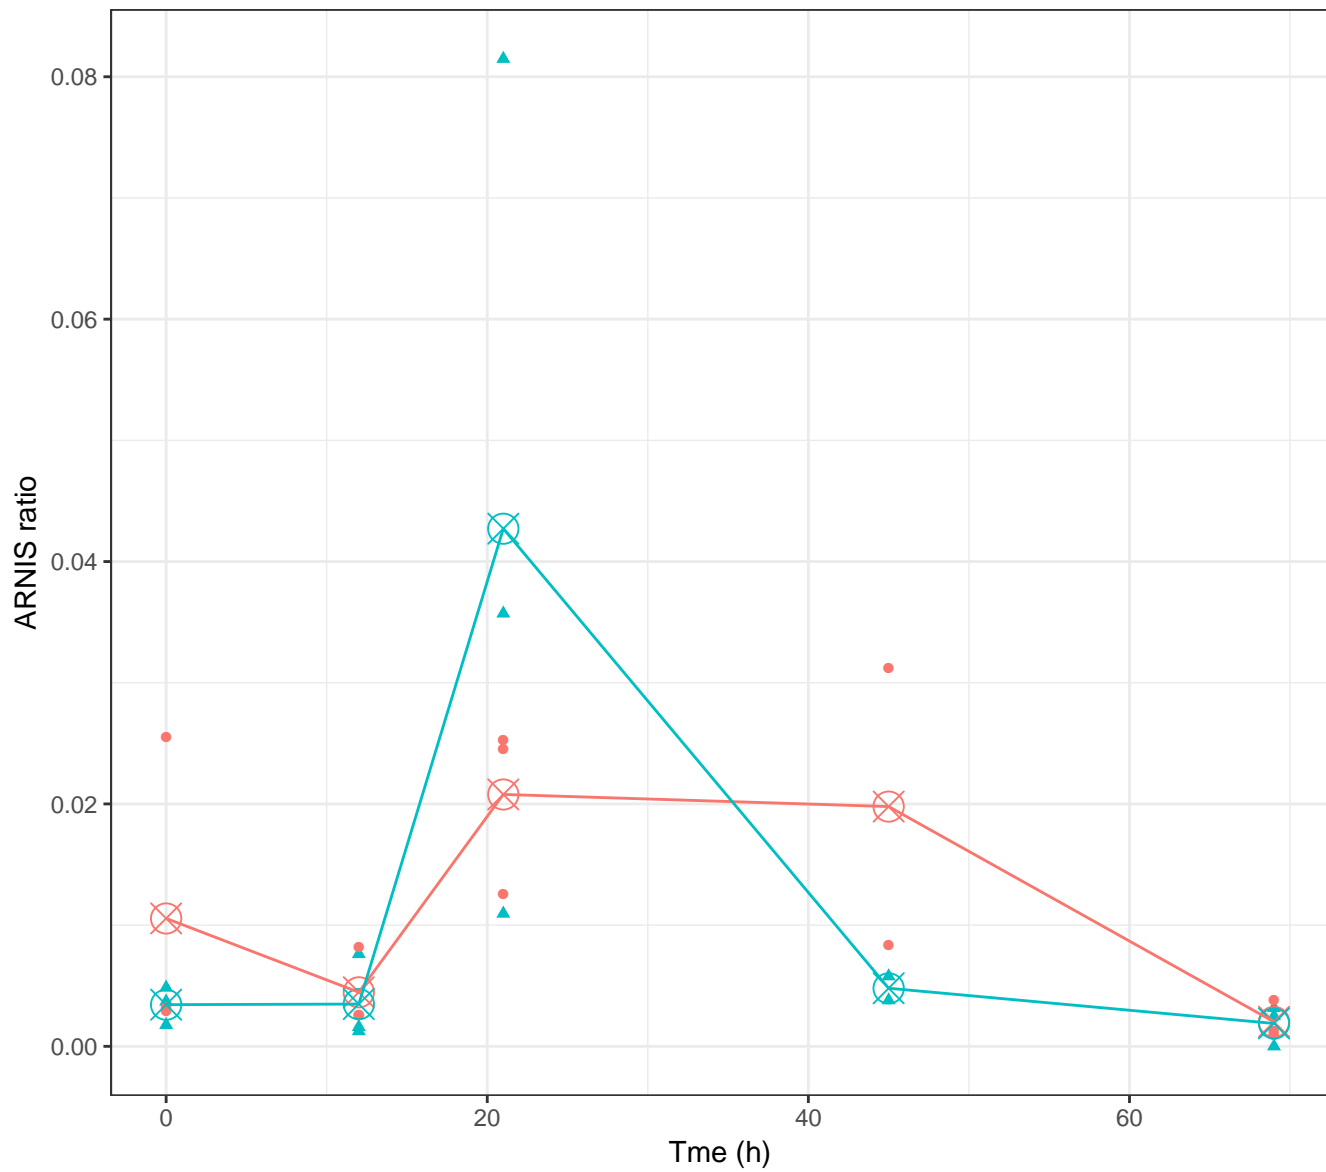

# OTU.497\_Bacteroidetes\_Fluviicola

Treatment Control Filtered-1micron

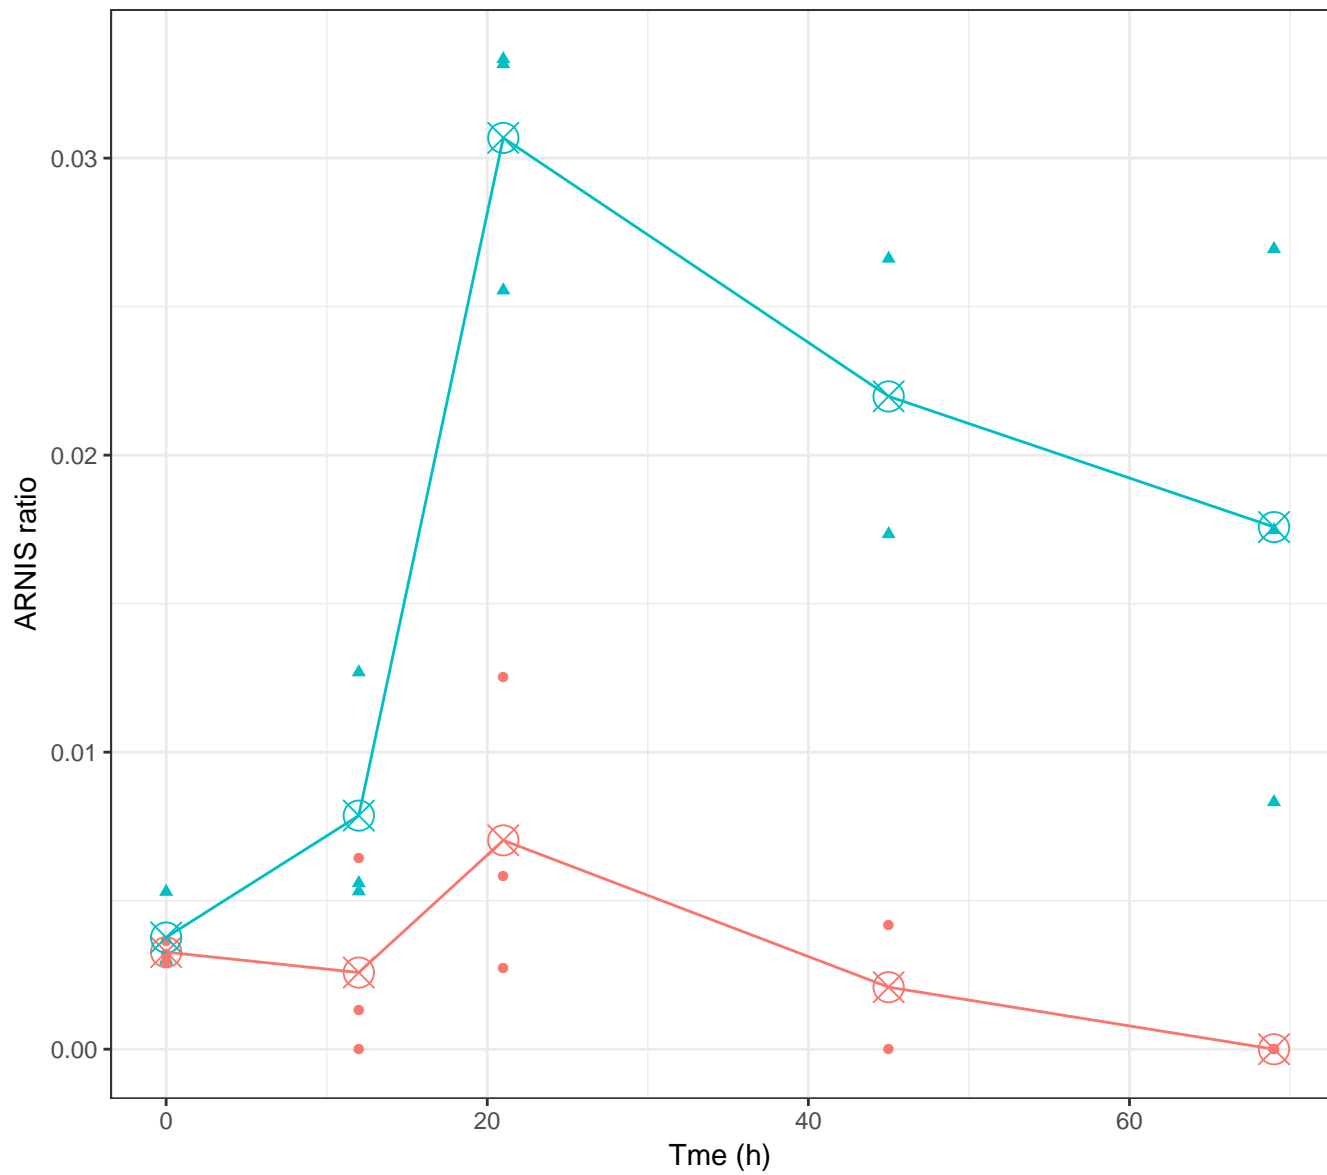



# OTU.696\_Gammaproteobacteria\_Pseudomonas

Treatment  Control  Filtered-1micron

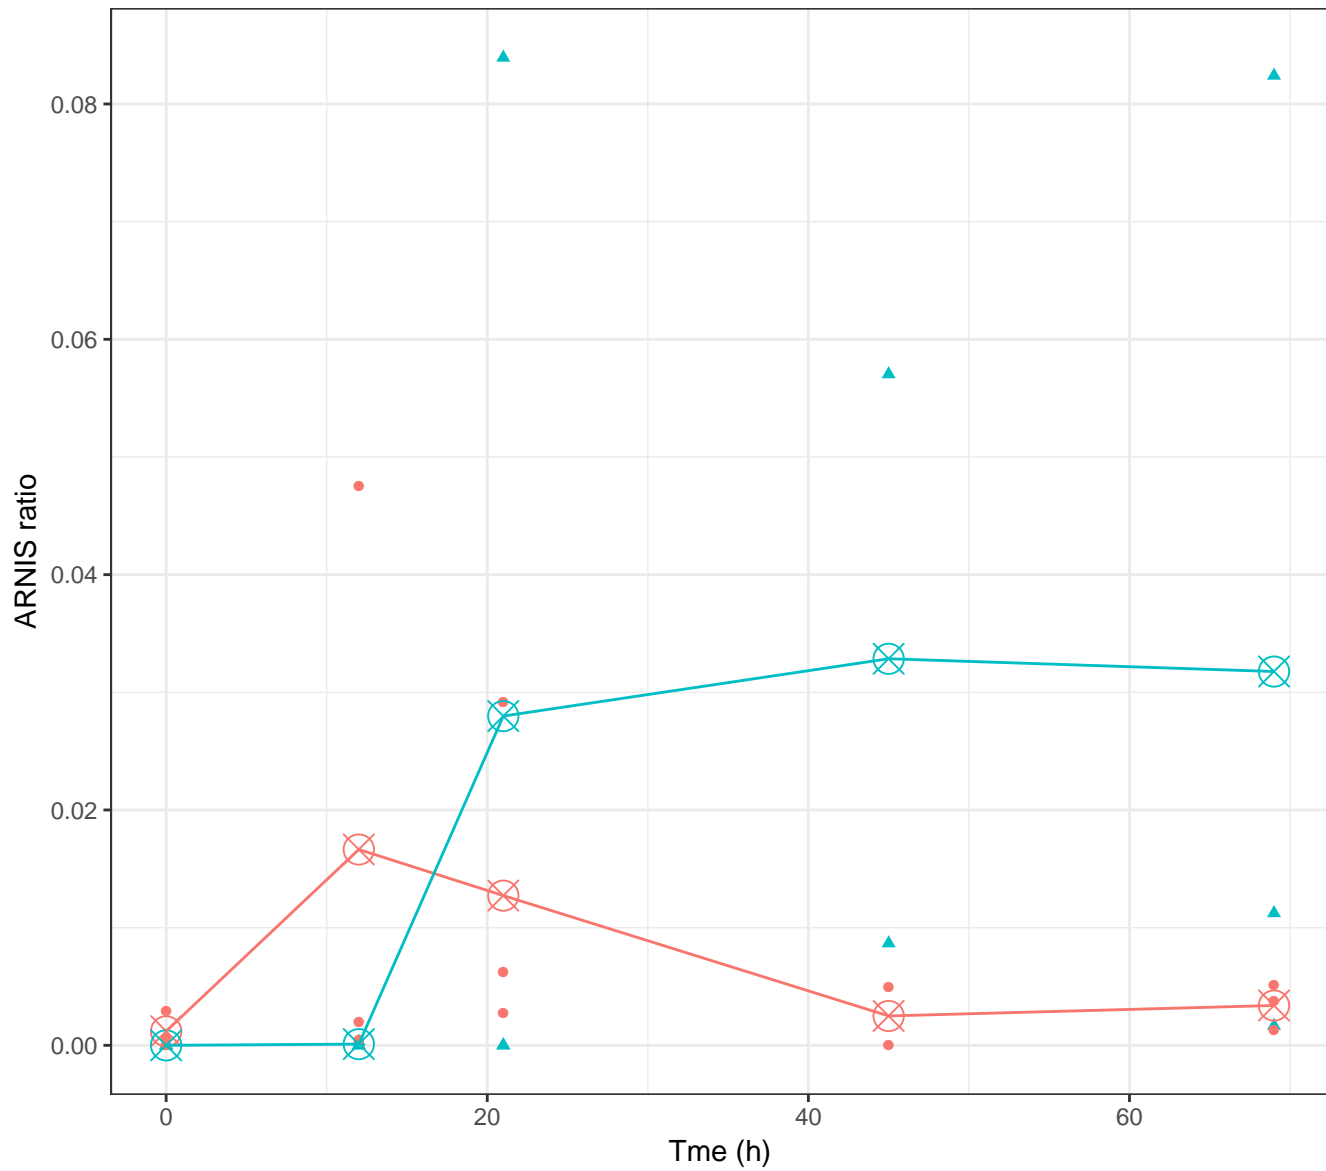

# OTU.563\_Bacteroidetes\_PHOS.HE51

Treatment Control Filtered-1micron

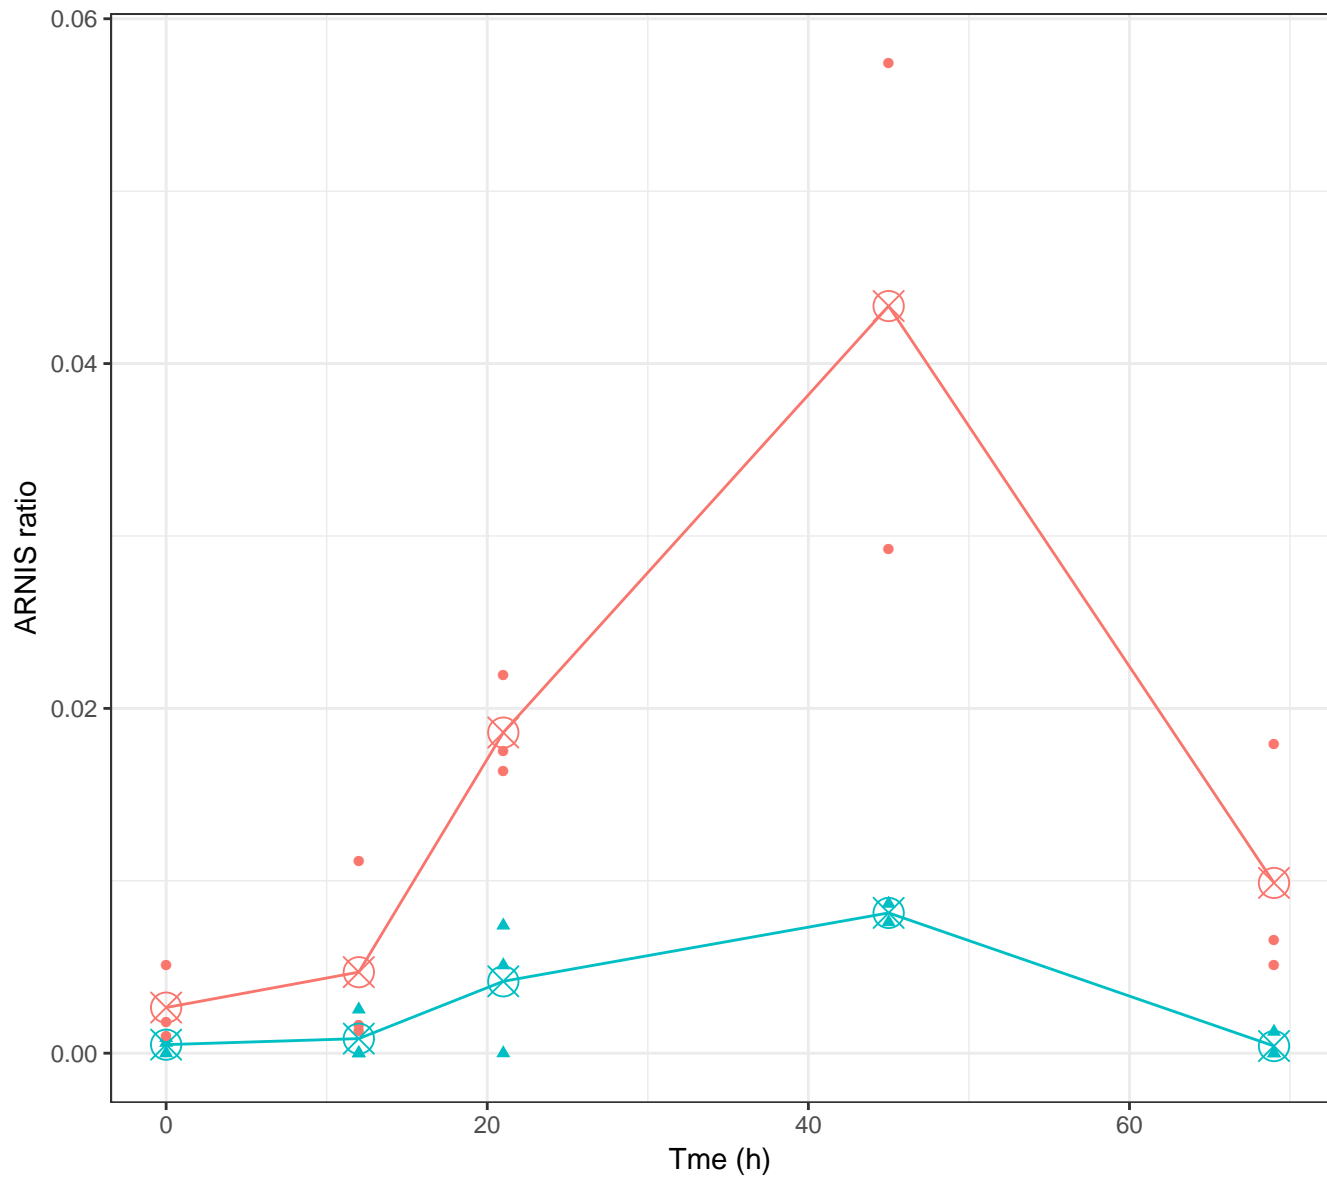

# OTU.510\_Bacteroidetes\_Chitinophagaceae

Treatment ⊗ Control ⊗ Filtered-1micron

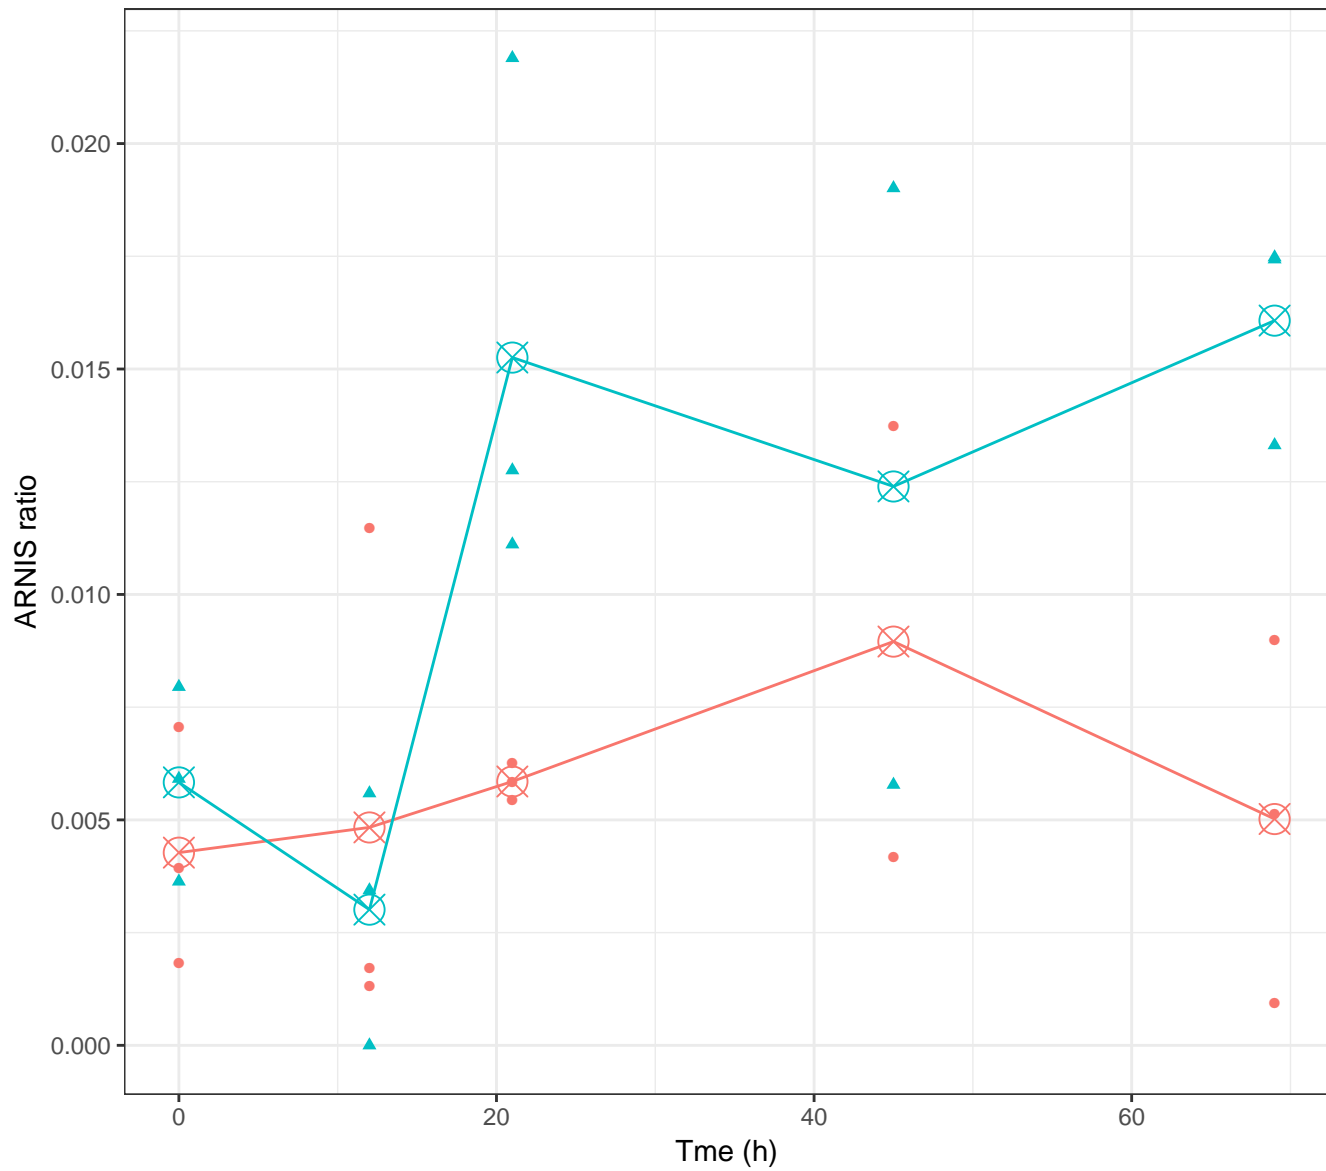

# OTU.49\_Chloroflexi\_SL56\_marine\_group

Treatment ⊗ Control ⊗ Filtered-1micron

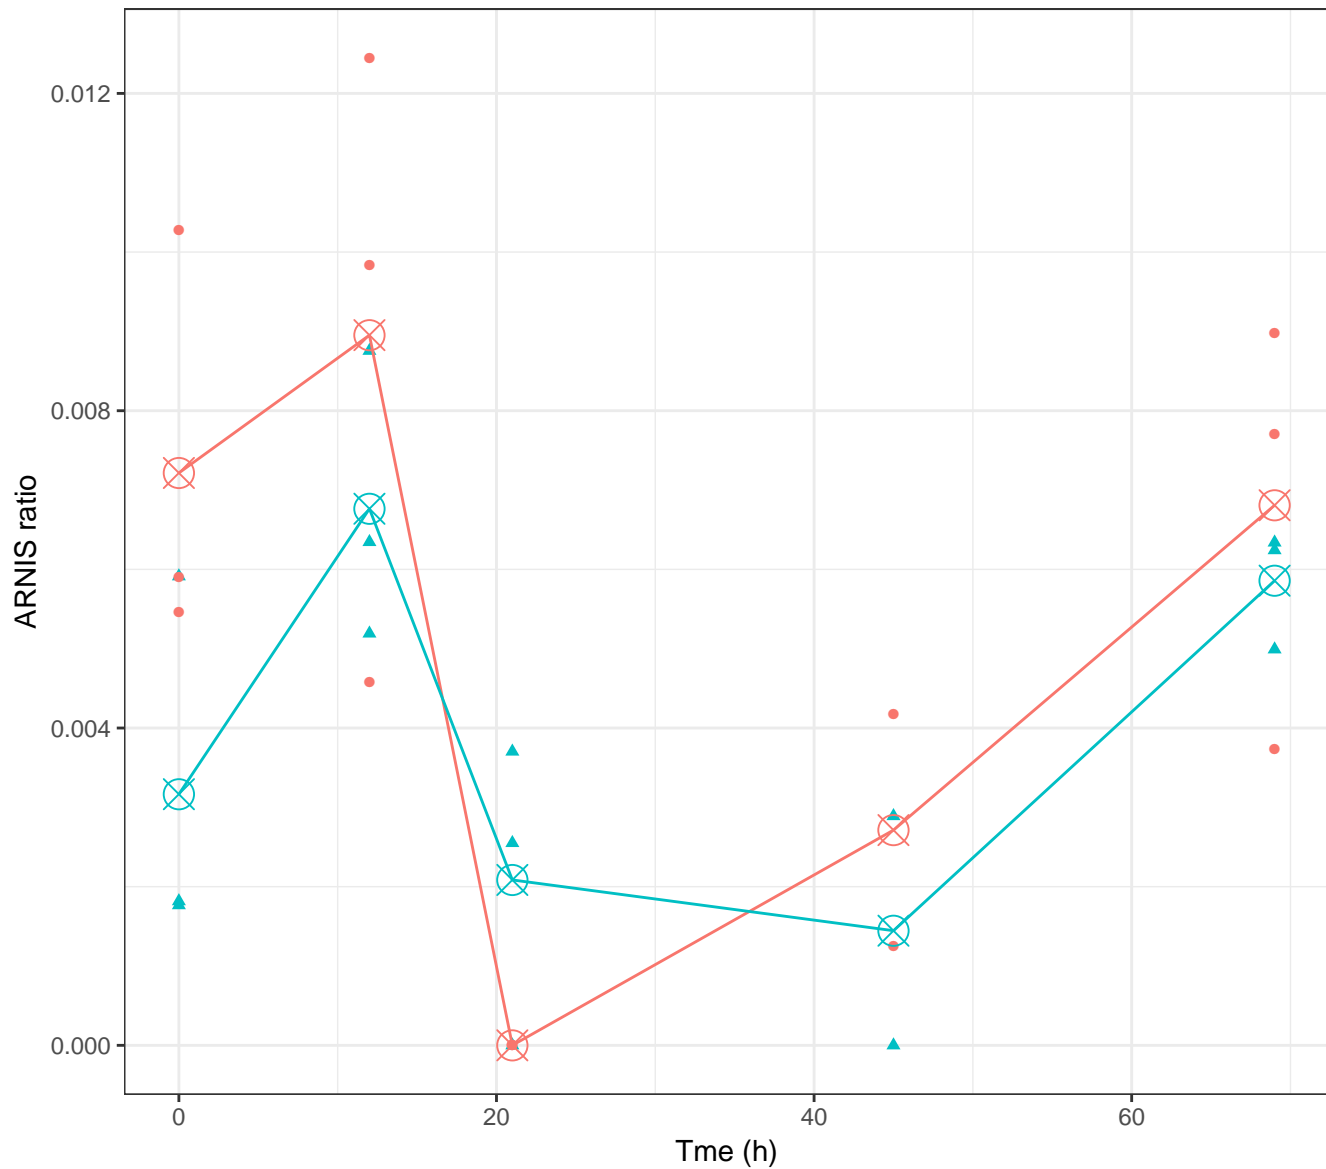

# OTU.646\_Alphaproteobacteria\_Sandarakinorhabdus

Treatment Control Filtered-1micron

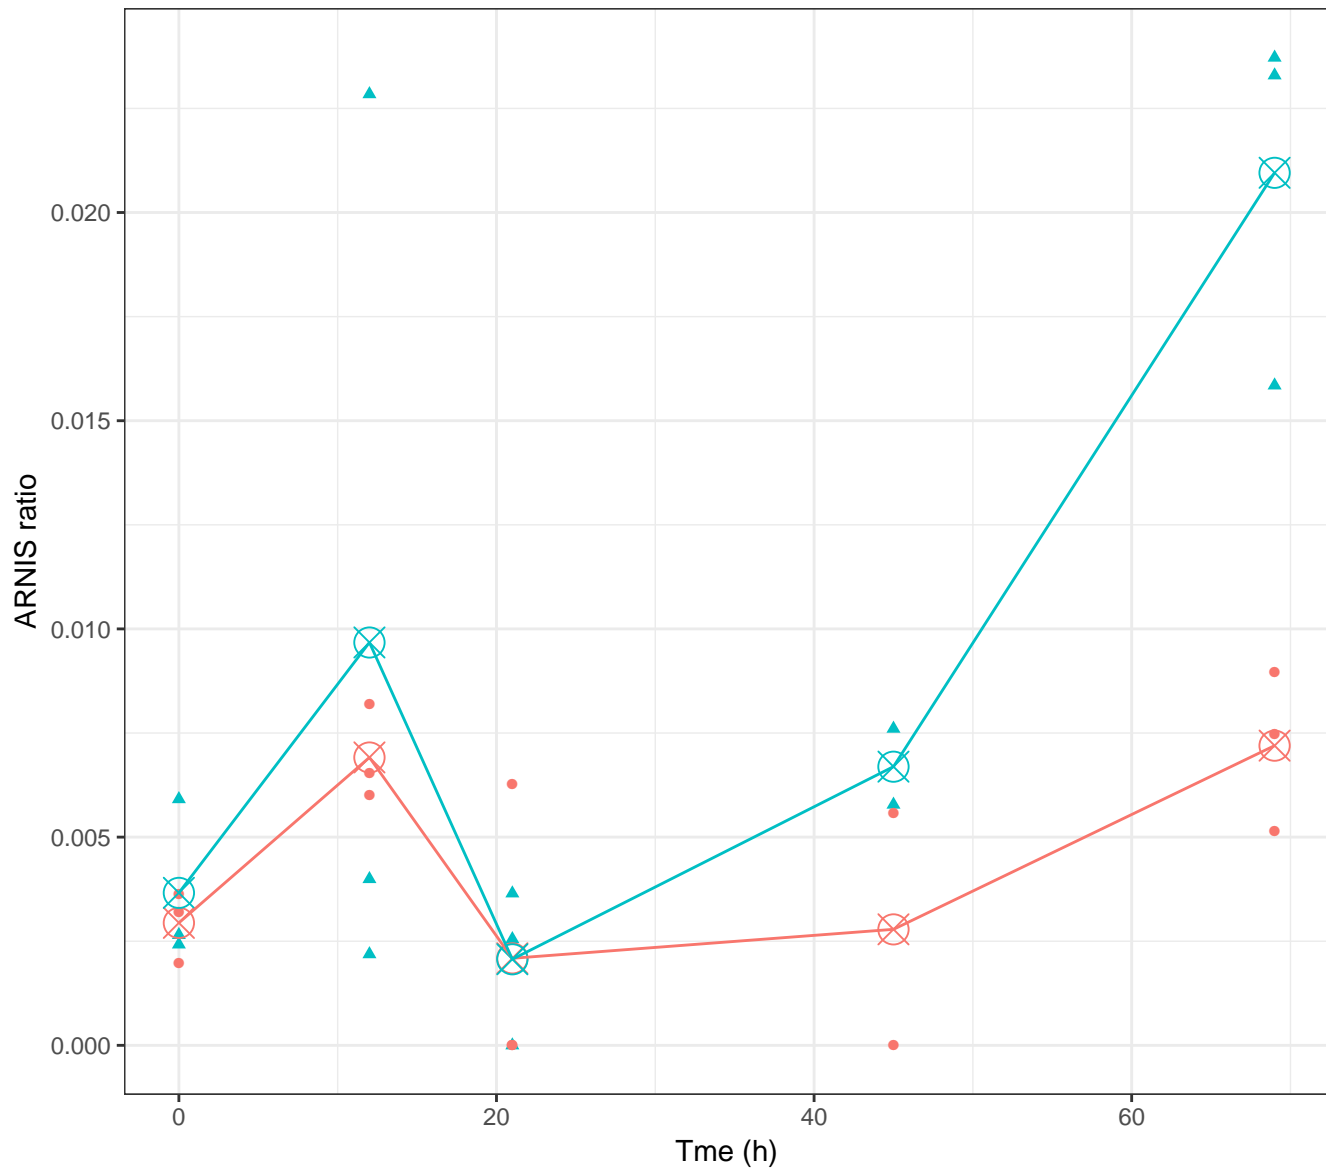

# OTU.673\_Planctomycetes\_Pirellula

Treatment Control Filtered-1micron

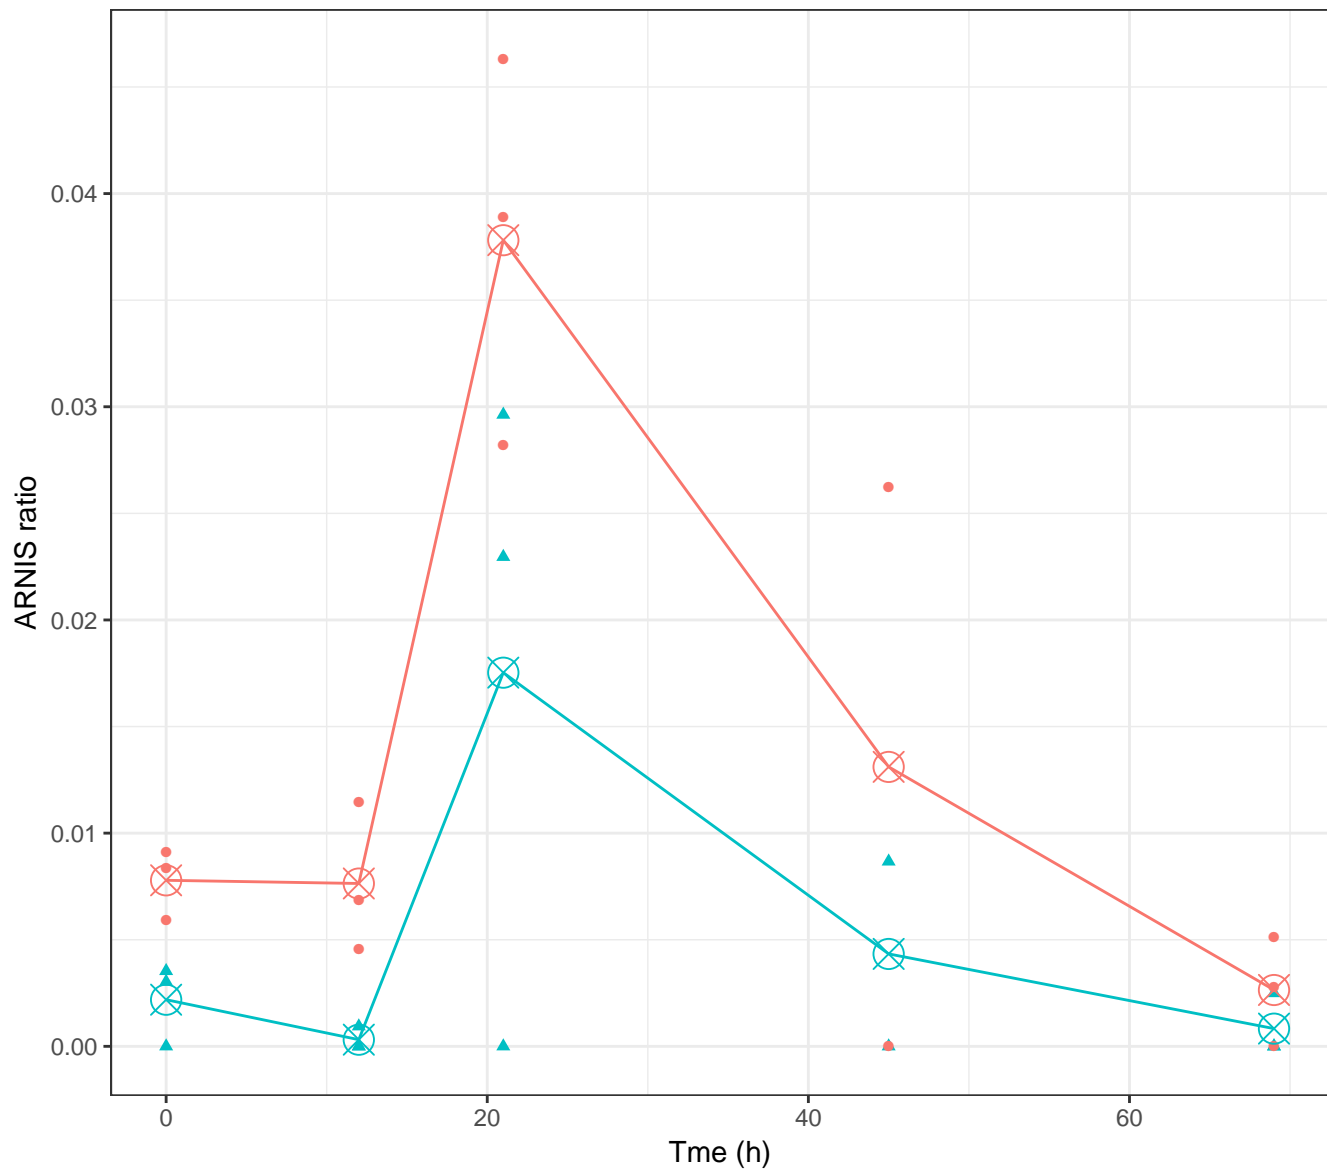

# OTU.529\_Planctomycetes\_Planctomyces

Treatment Control Filtered-1micron

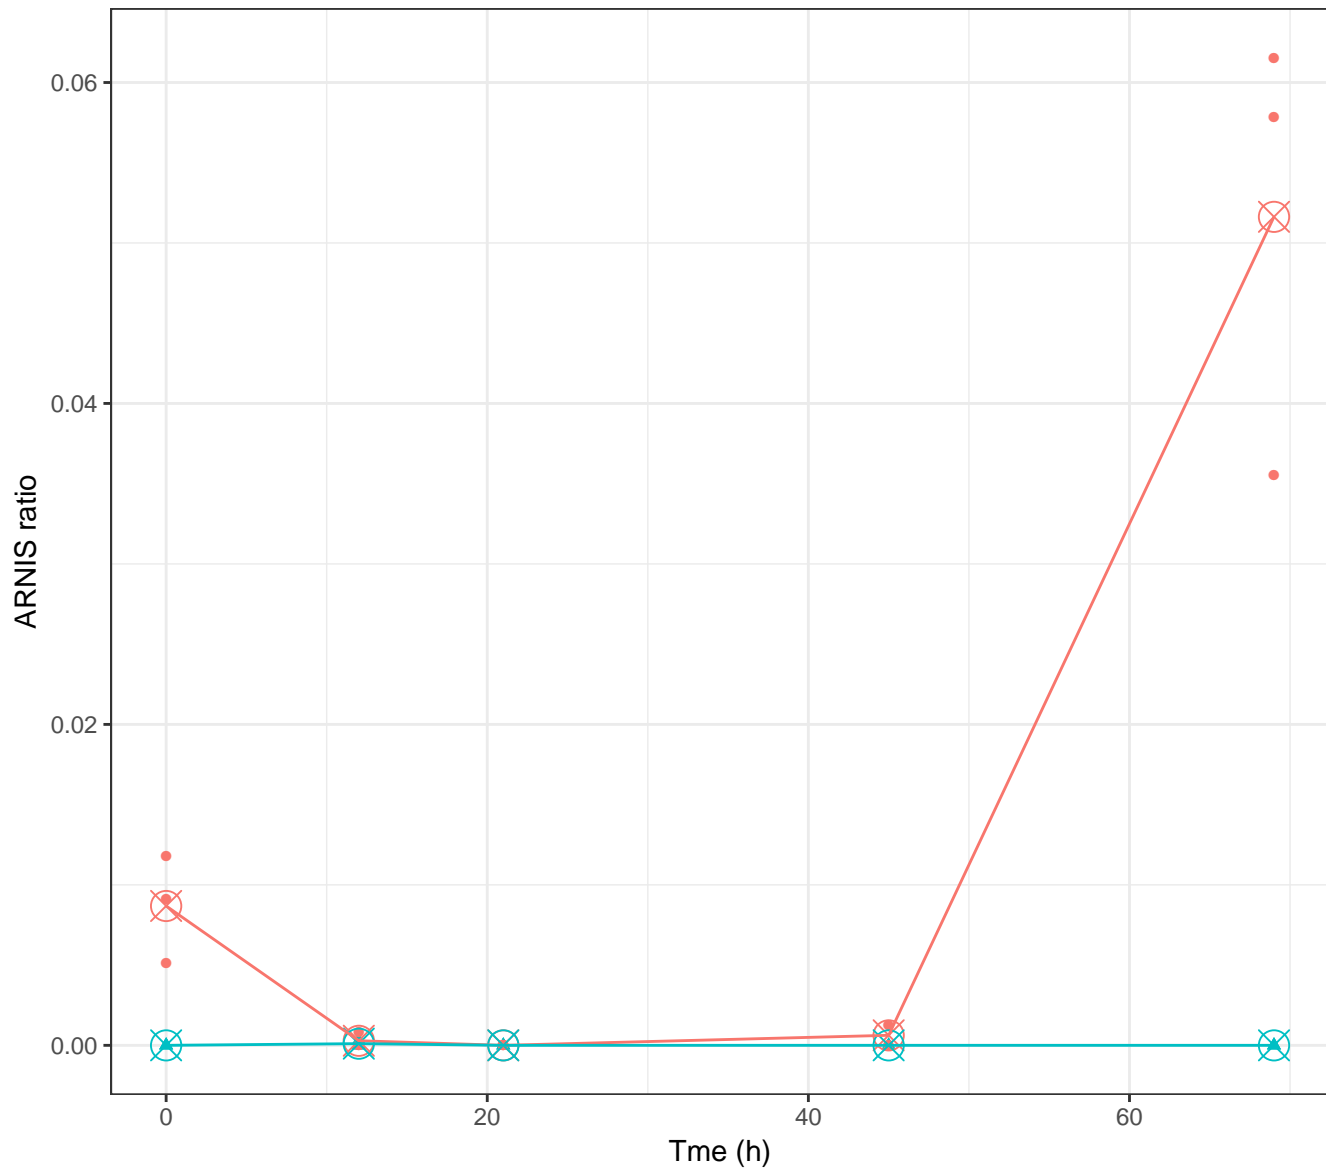

# OTU.249\_Bacteroidetes\_Chitinophagaceae

Treatment Control Filtered-1micron

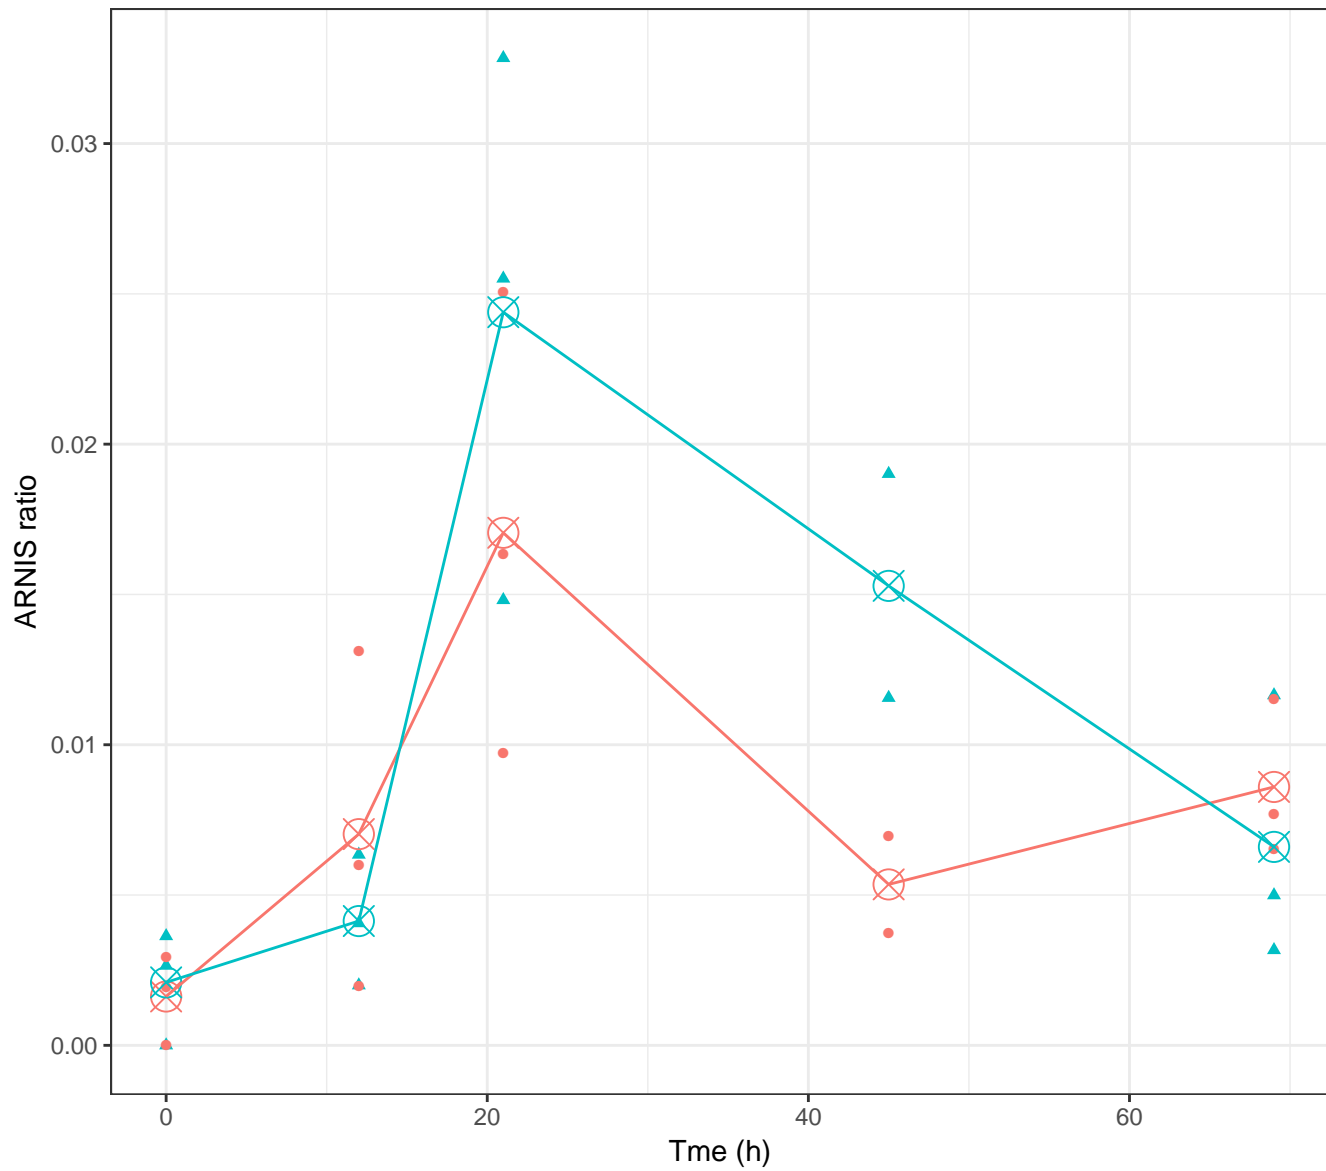



# OTU.532\_Deltaproteobacteria\_mle1.27

Treatment Control Filtered-1micron

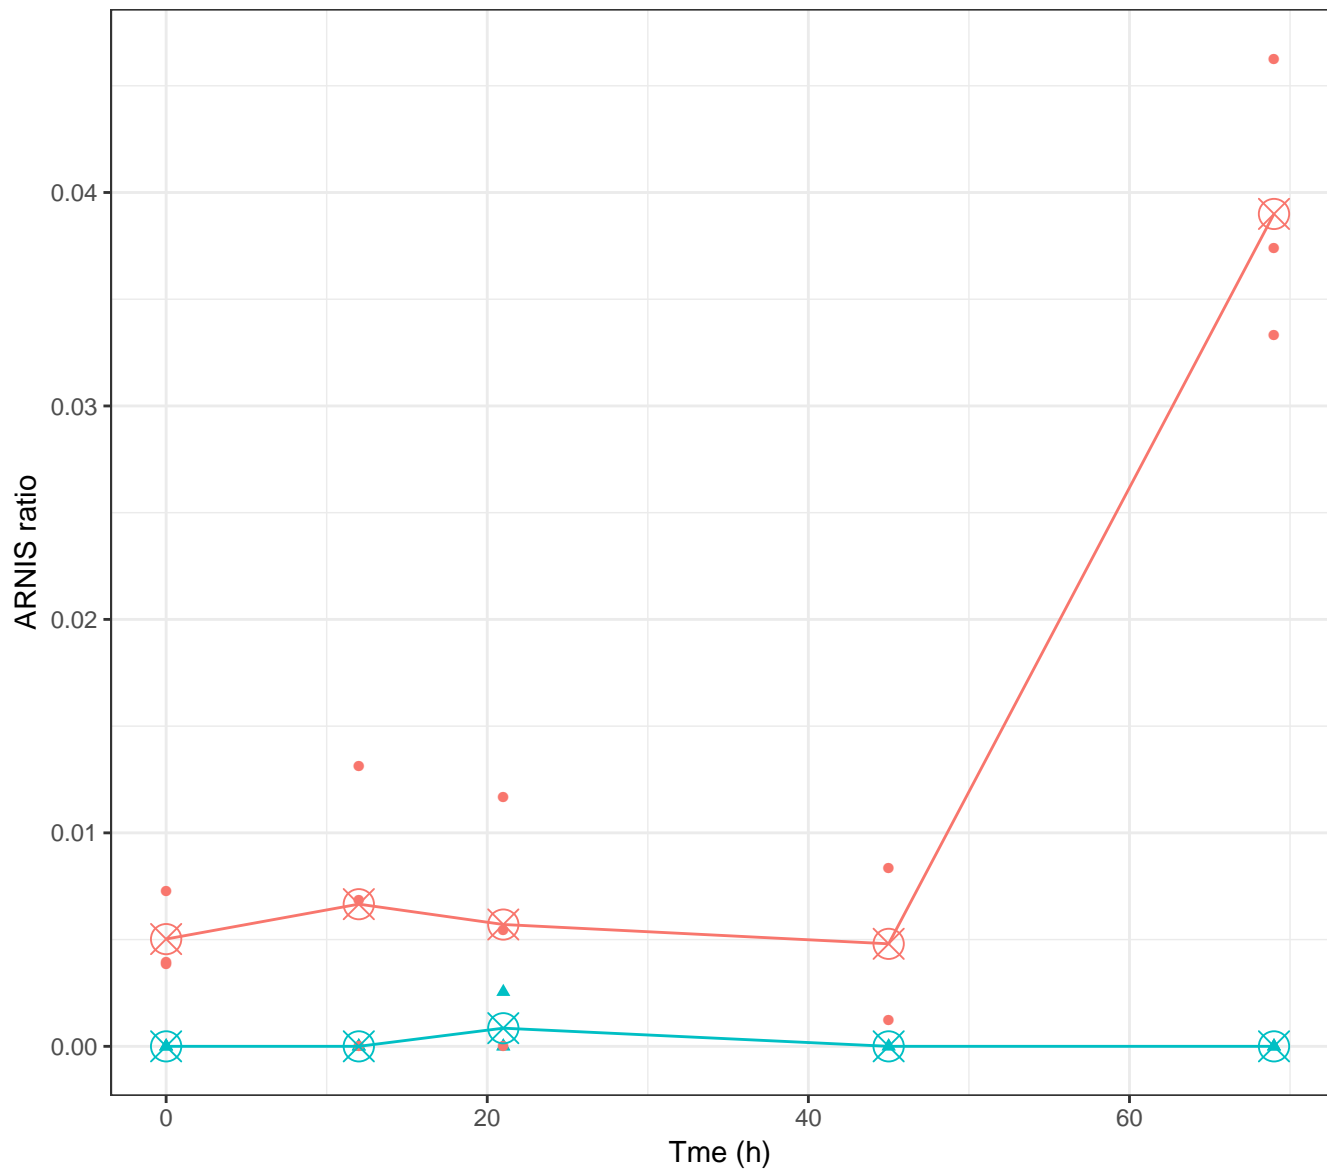

# OTU.312\_Chloroflexi\_Roseiflexus

Treatment ⊗ Control ⊗ Filtered-1micron

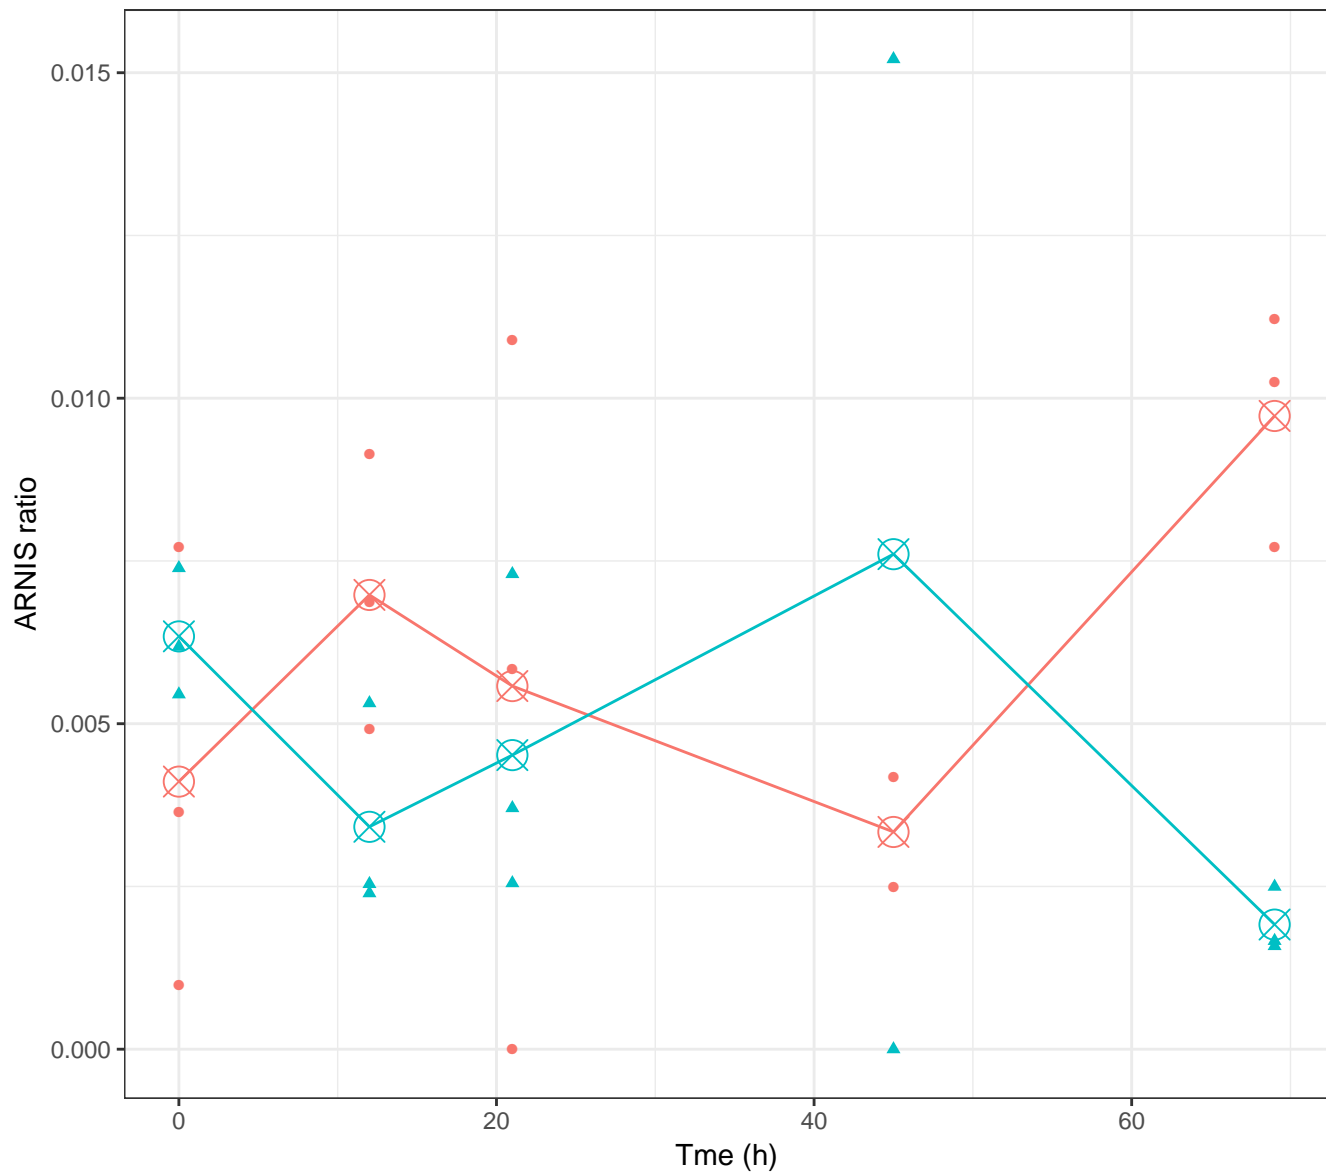

# OTU.166\_Actinobacteria\_Microbacteriaceae

Treatment ⊗ Control ⊗ Filtered-1micron

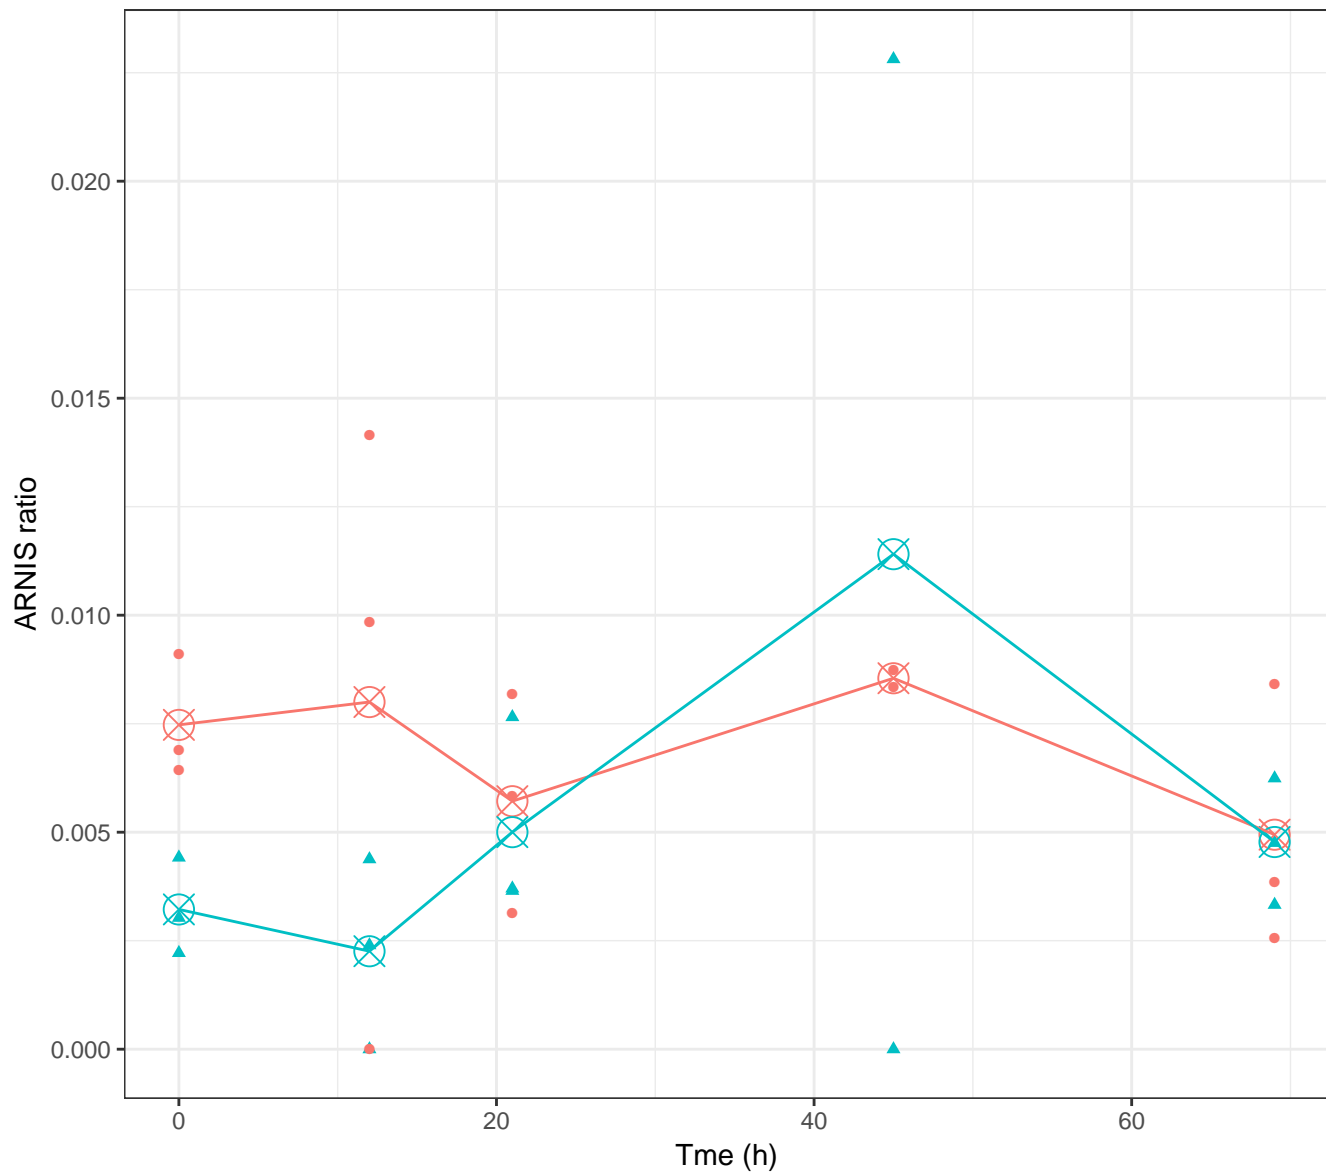

# OTU.530\_Planctomyces\_Planctomyces

Treatment Control Filtered-1micron

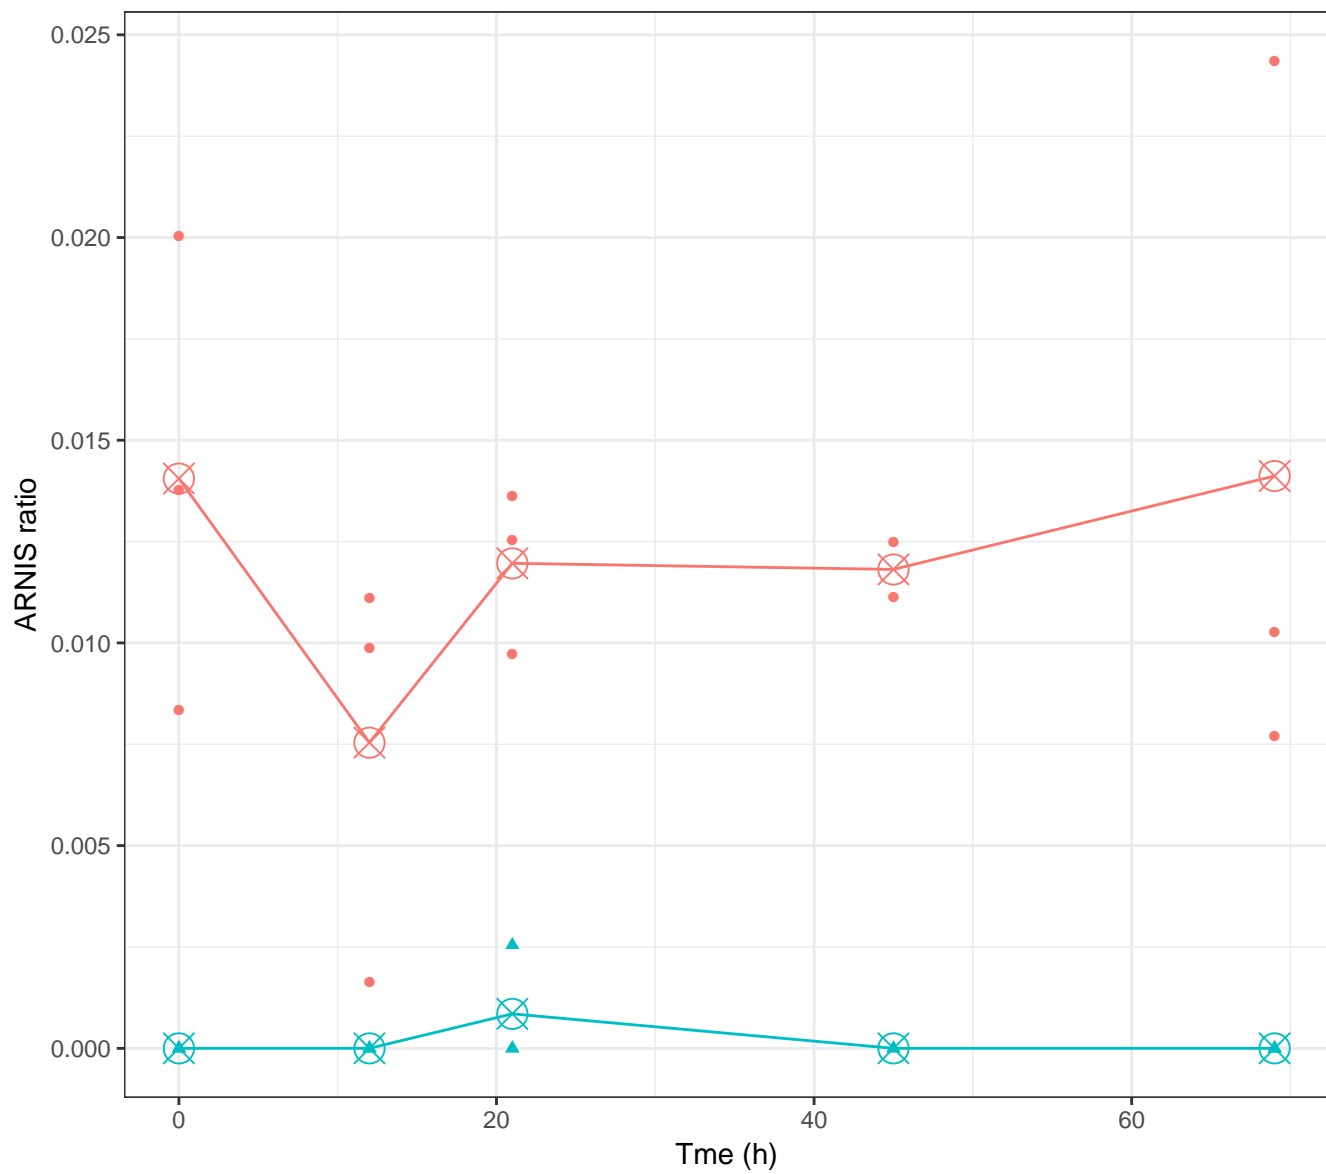

# OTU.538\_Bacteroidetes\_Elizabethkingia

Treatment Control Filtered-1micron

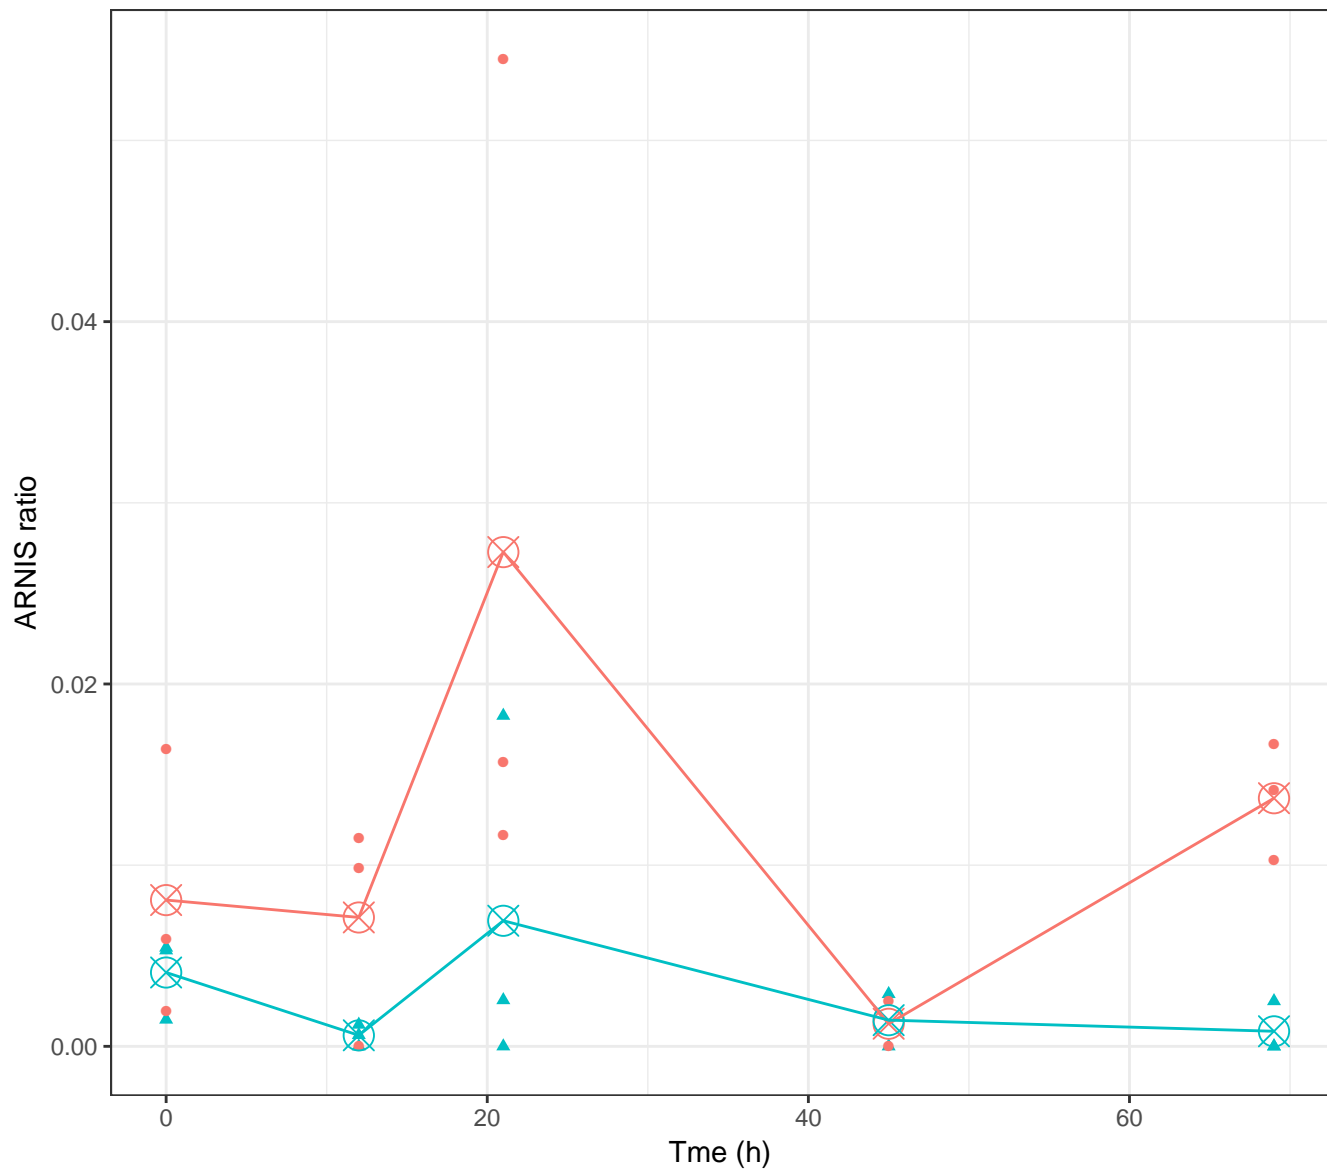

## OTU.36\_Bacteroidetes\_Fluviicola

Treatment Control Filtered-1micron

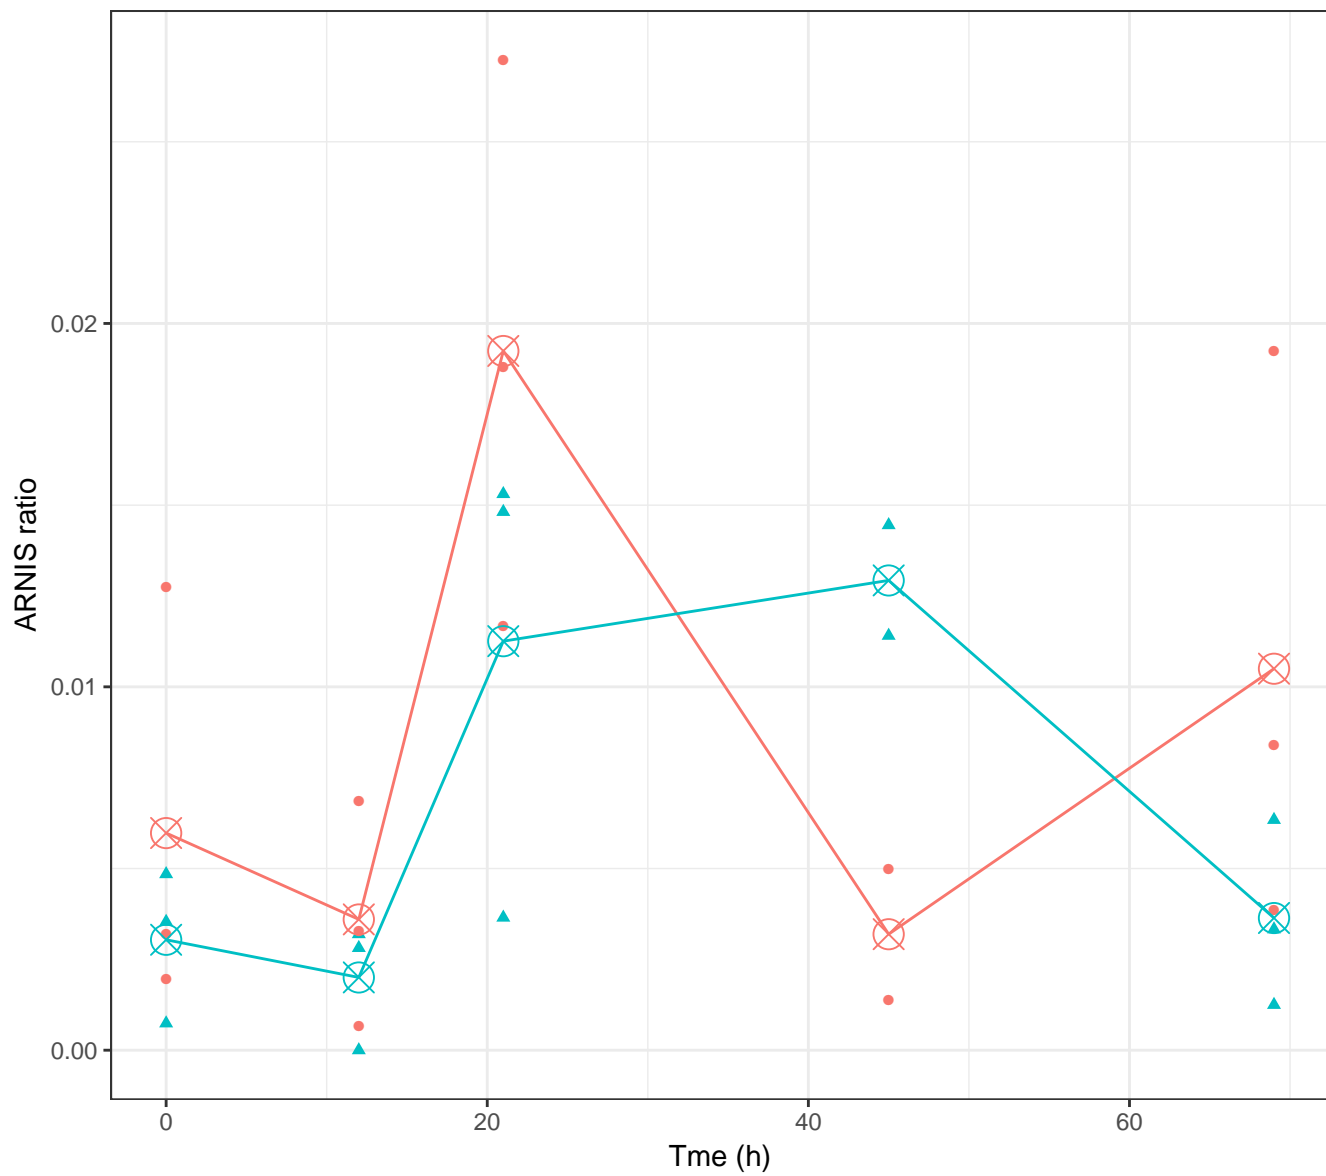

# OTU.500\_Alphaproteobacteria\_Hyphomonadaceae

Treatment Control Filtered-1micron

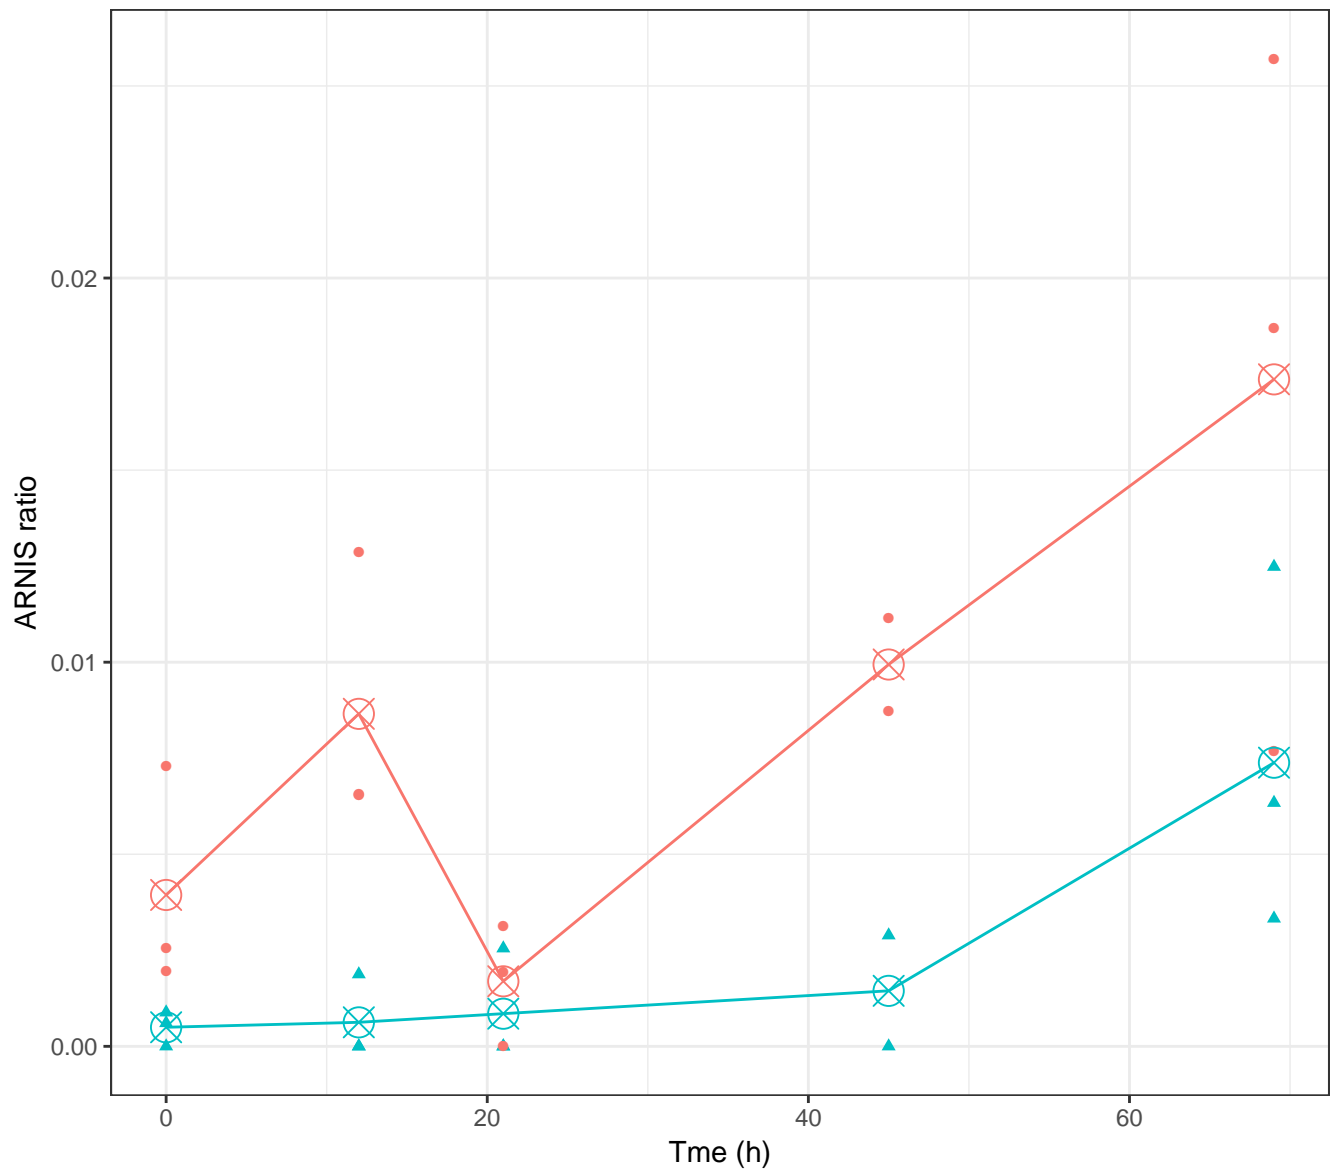

## OTU.499\_Firmicutes\_Weissella\_1

Treatment Control Filtered-1micron

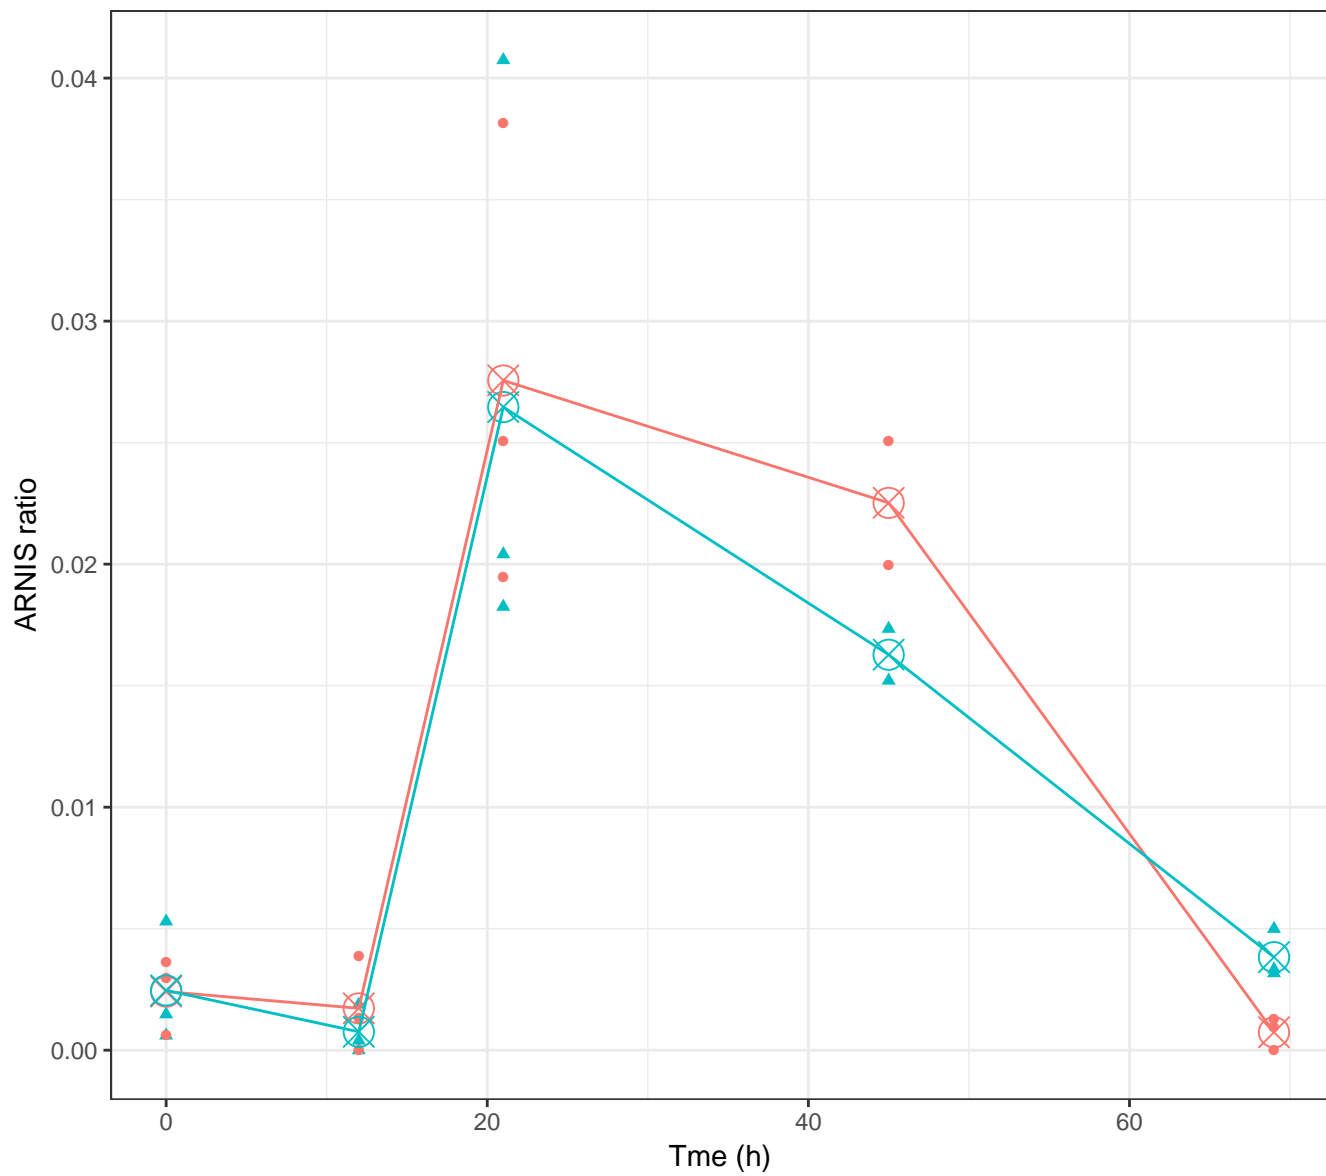



# OTU.10014\_Betaproteobacteria\_Comamonadaceae

Treatment Control Filtered-1micron

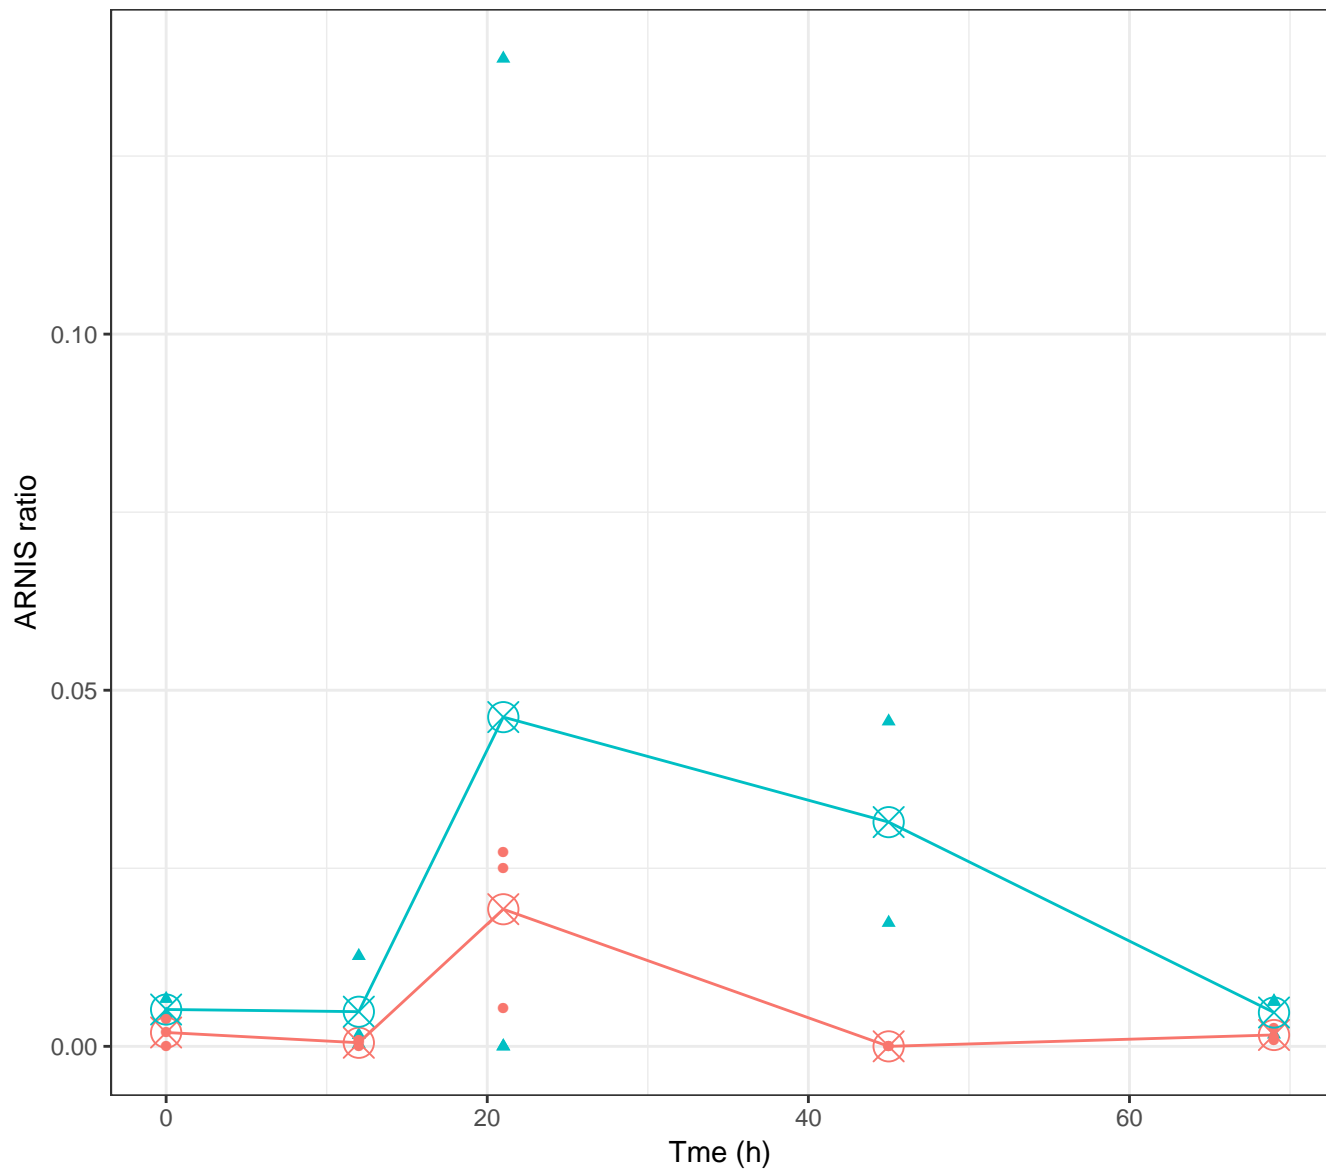

# OTU.4\_Bacteroidetes\_Flavobacterium

Treatment Control Filtered-1micron

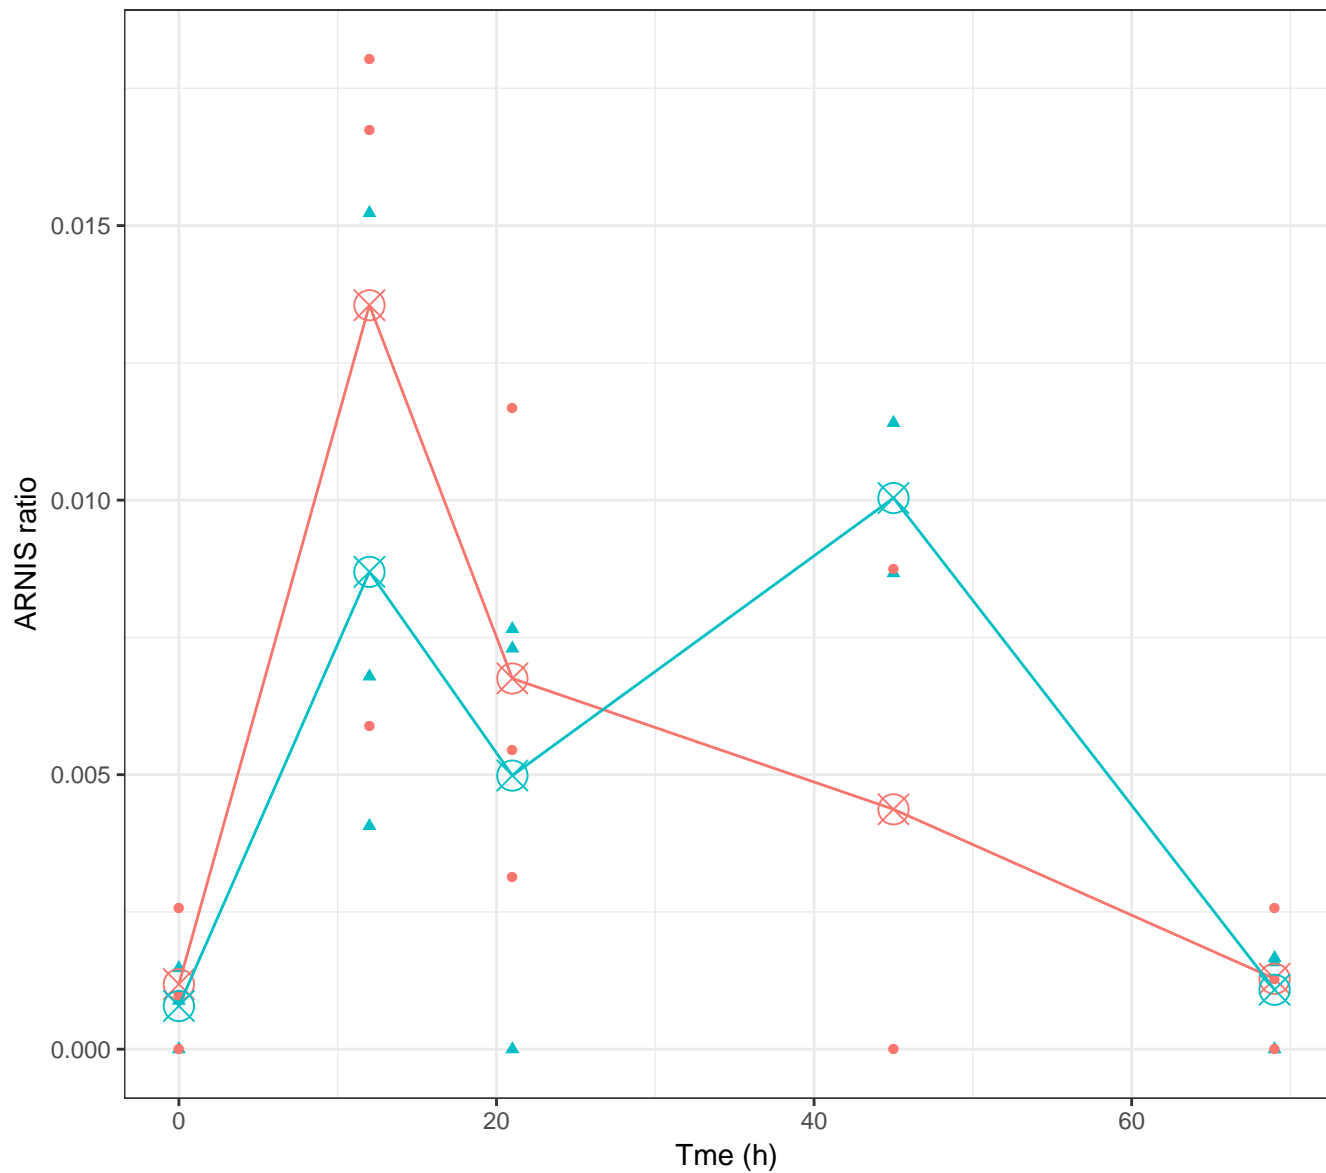

# OTU.4673\_Gammaproteobacteria\_Acinetobacter

Treatment Control Filtered-1micron

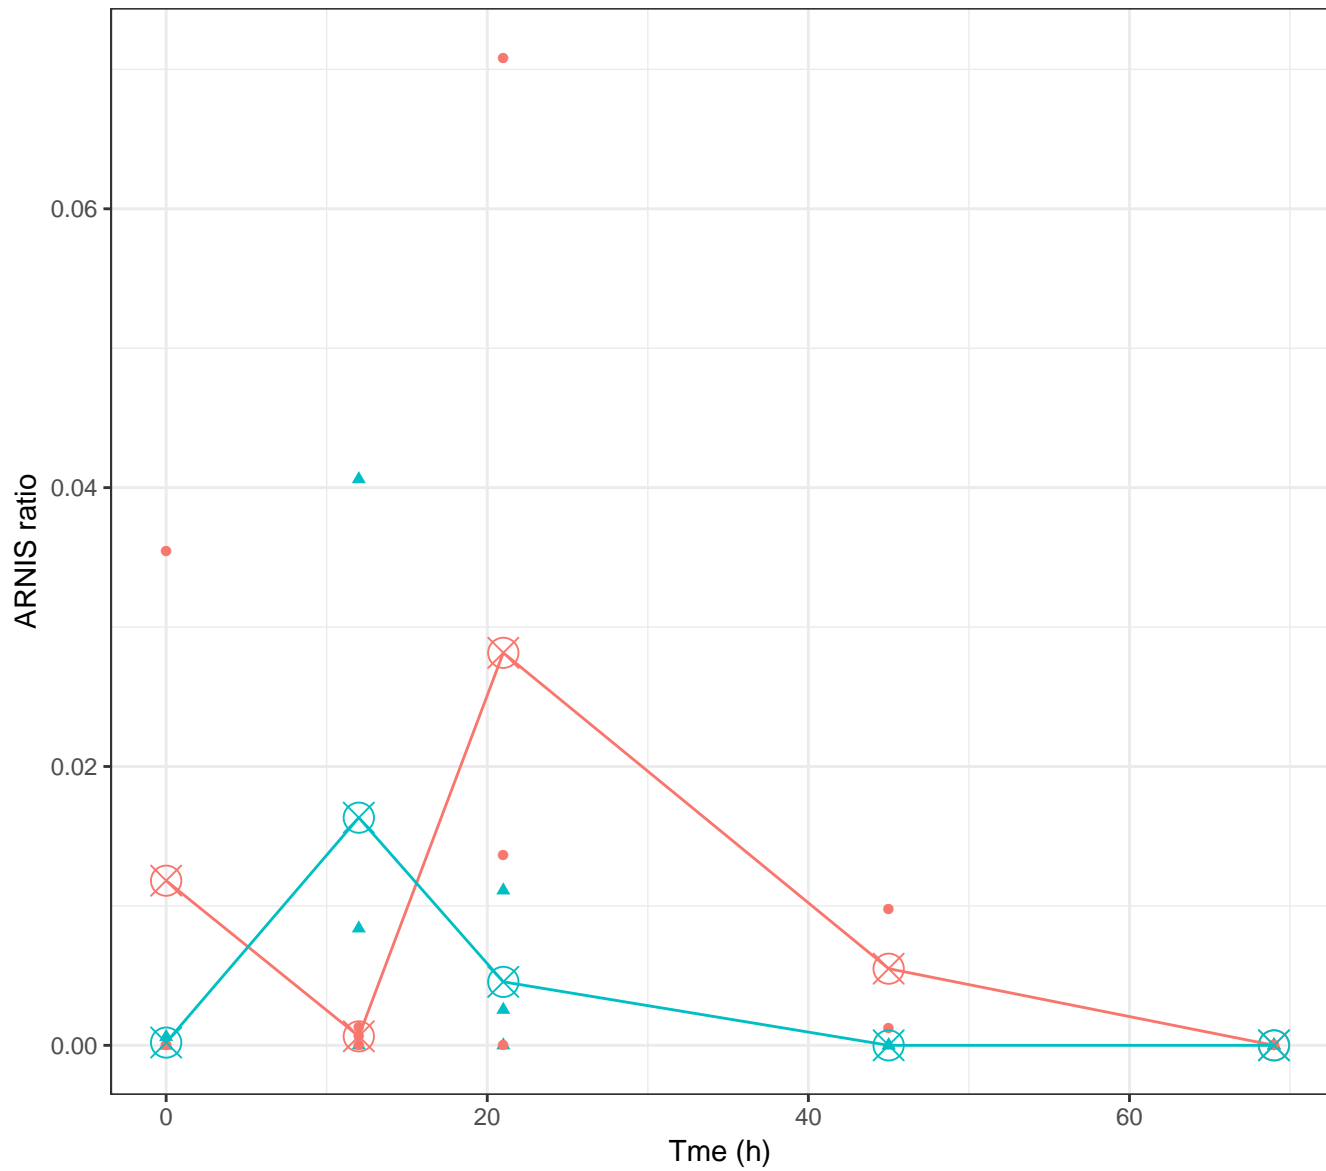

# OTU.644\_Gammaproteobacteria\_Rheinheimera

Treatment Control Filtered-1micron

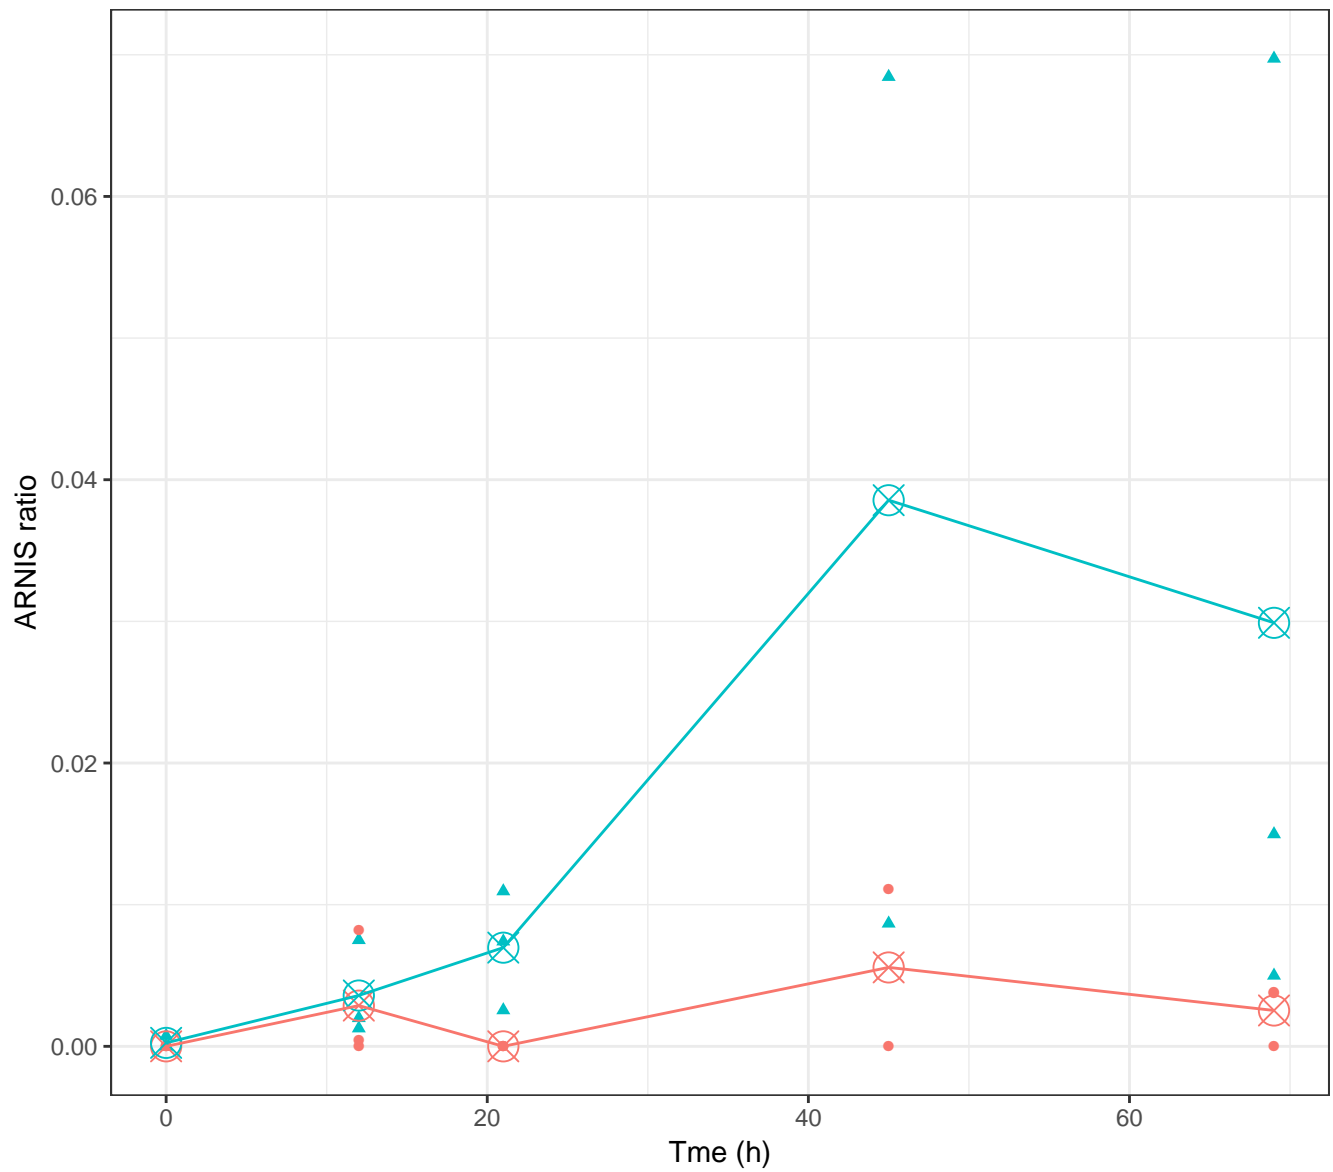

# OTU.241\_Betaproteobacteria\_Methylophilaceae\_PRD01a011B

Treatment Control Filtered-1micron

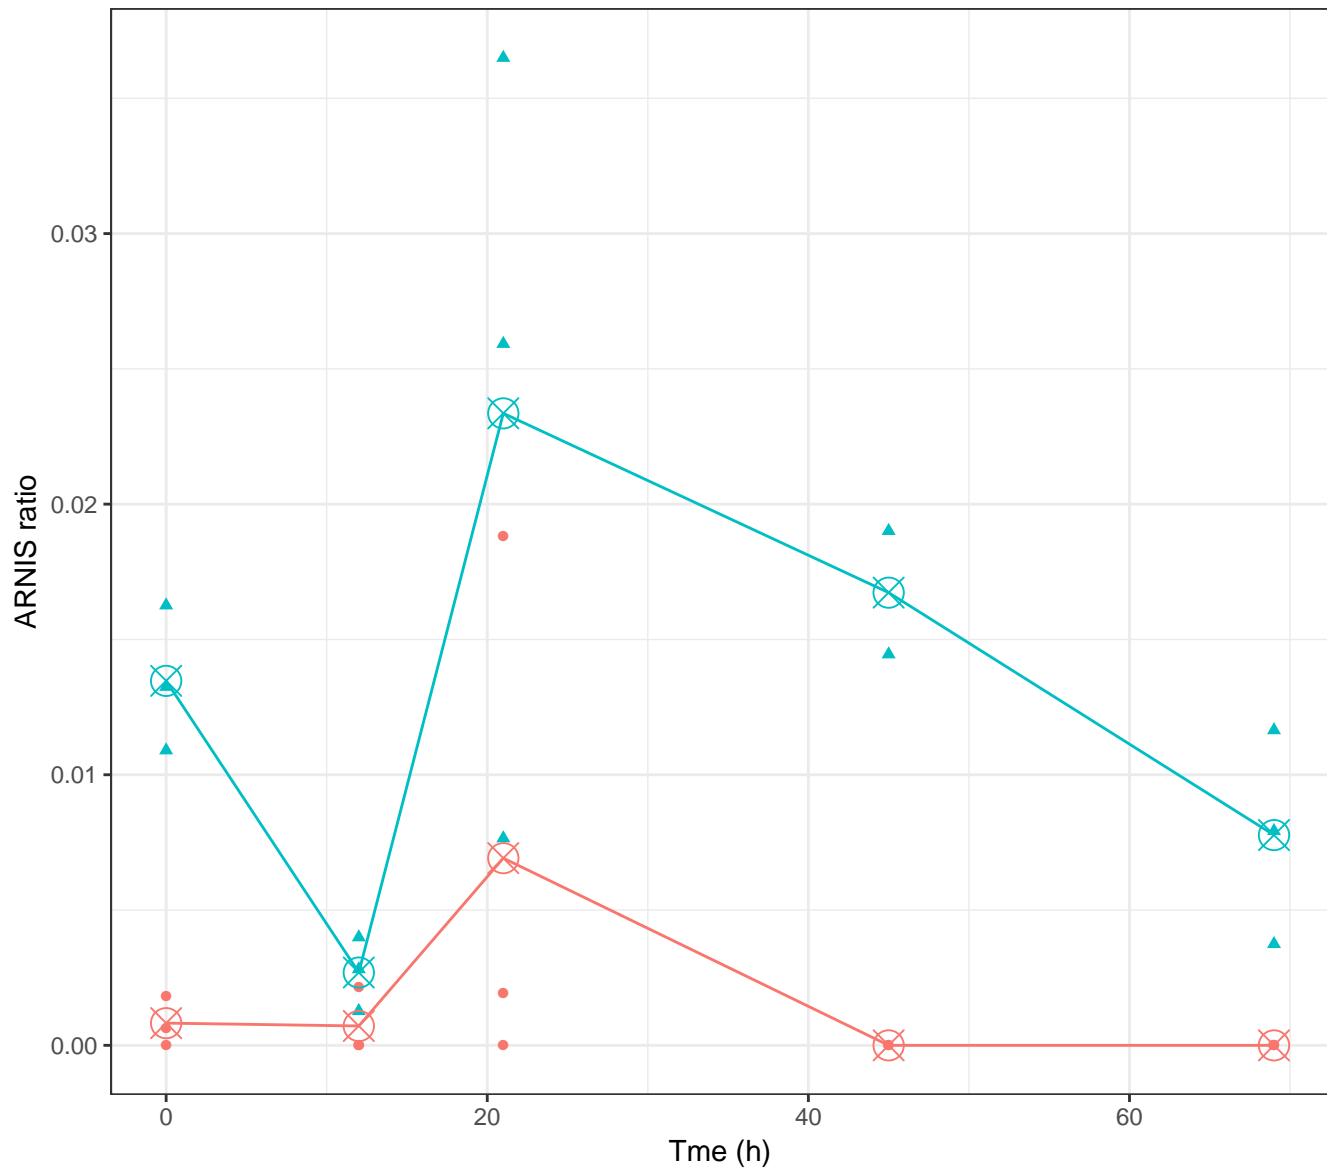

# OTU.620\_Gammaproteobacteria\_BD1.7\_clade

Treatment ⊗ Control ⊗ Filtered-1micron

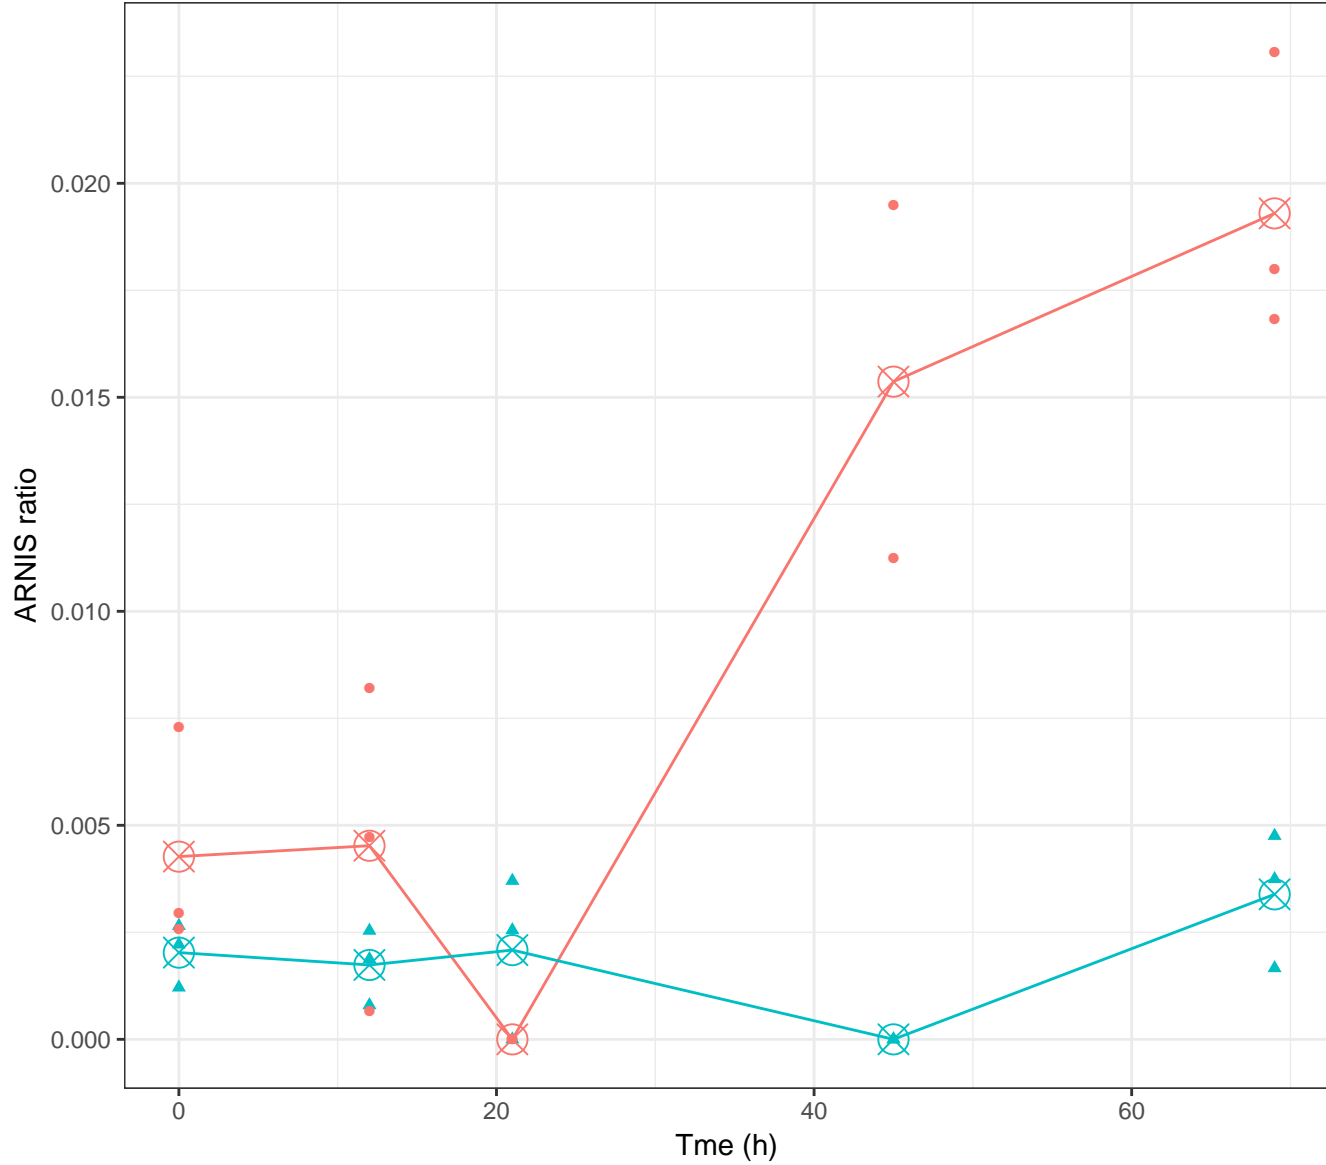

# OTU.570\_Bacteroidetes\_Chitinophagaceae

Treatment Control Filtered-1micron

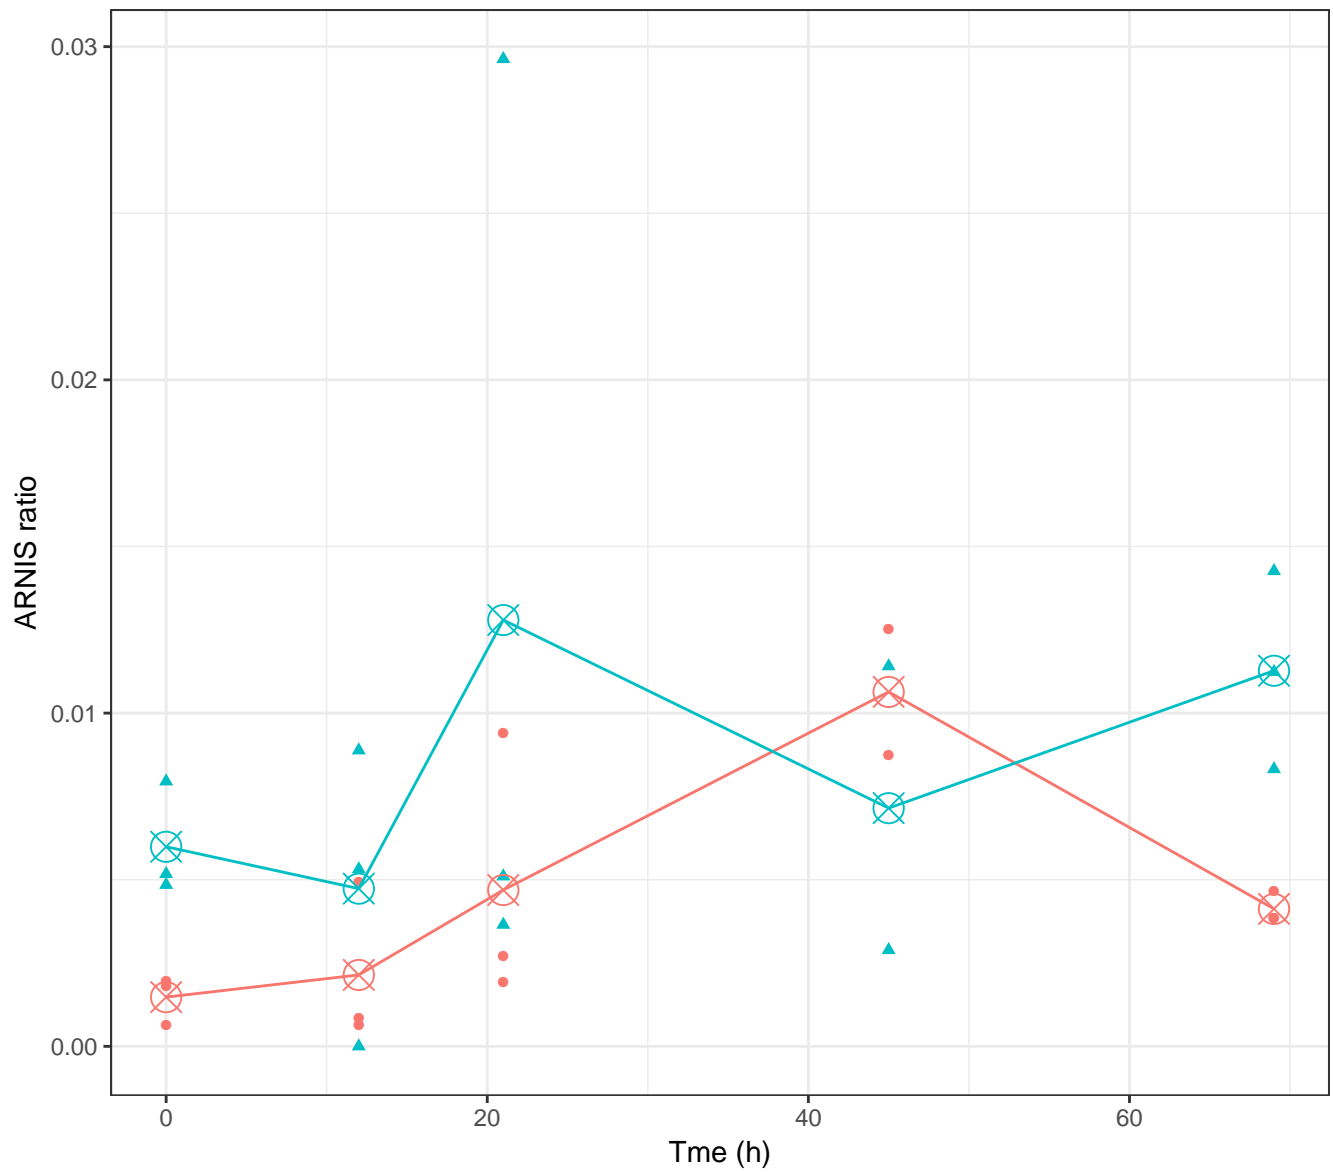

# OTU.4565\_Bacteroidetes\_Flavobacterium

Treatment Control Filtered-1micron

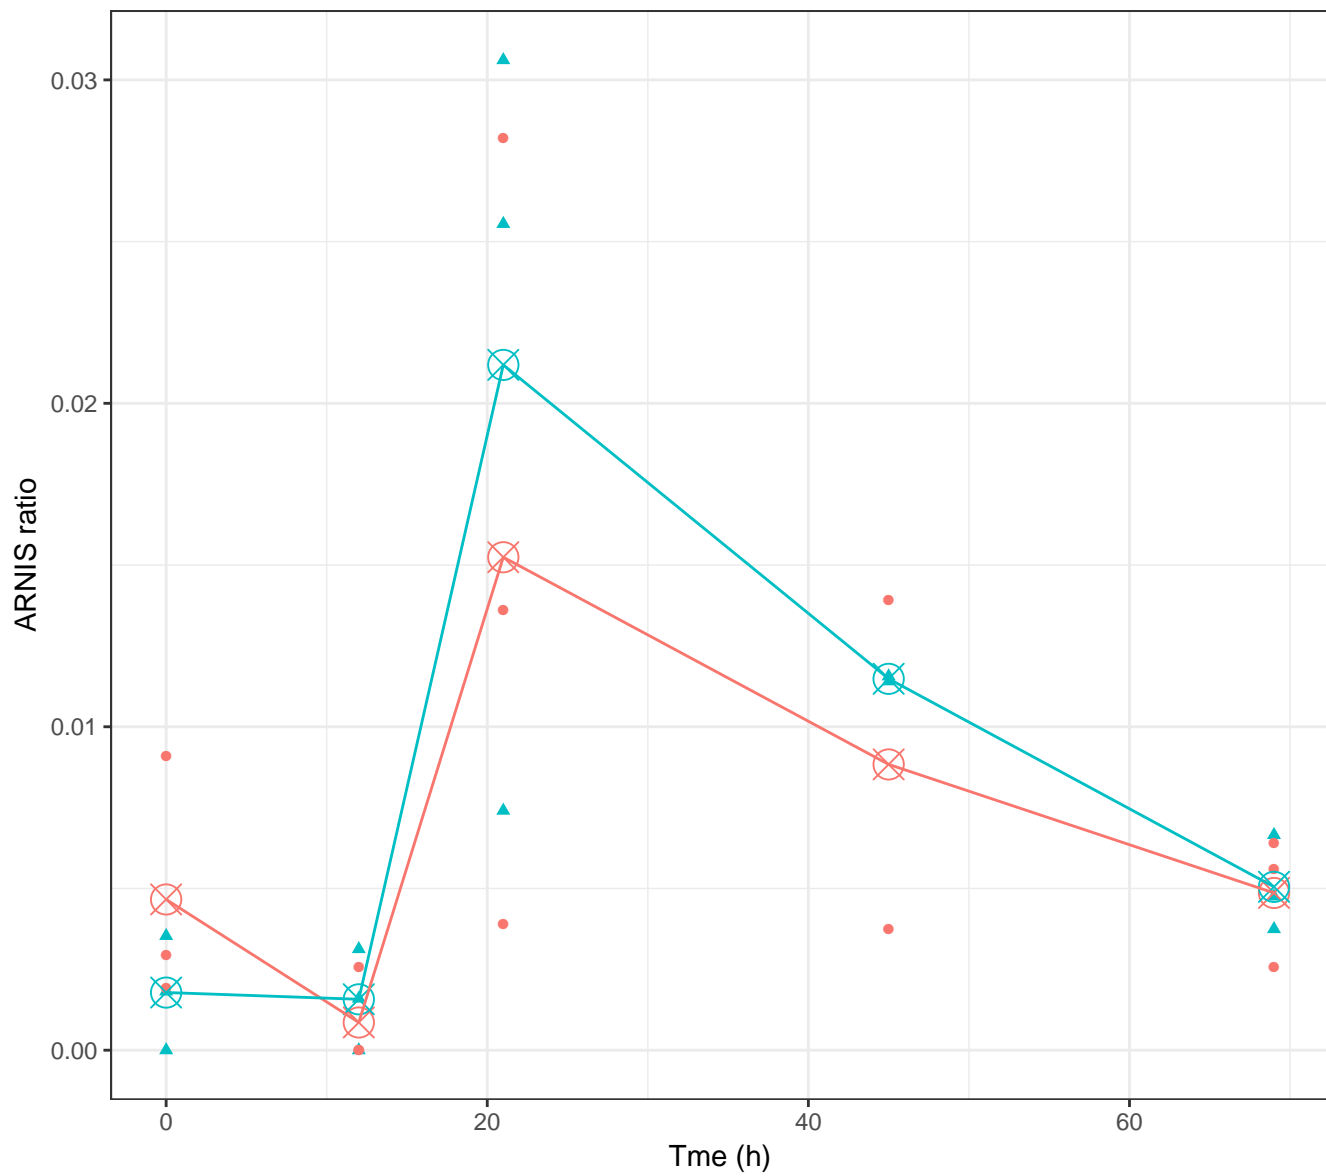



# OTU.628\_Alphaproteobacteria\_Phenylobacterium

Treatment Control Filtered-1micron

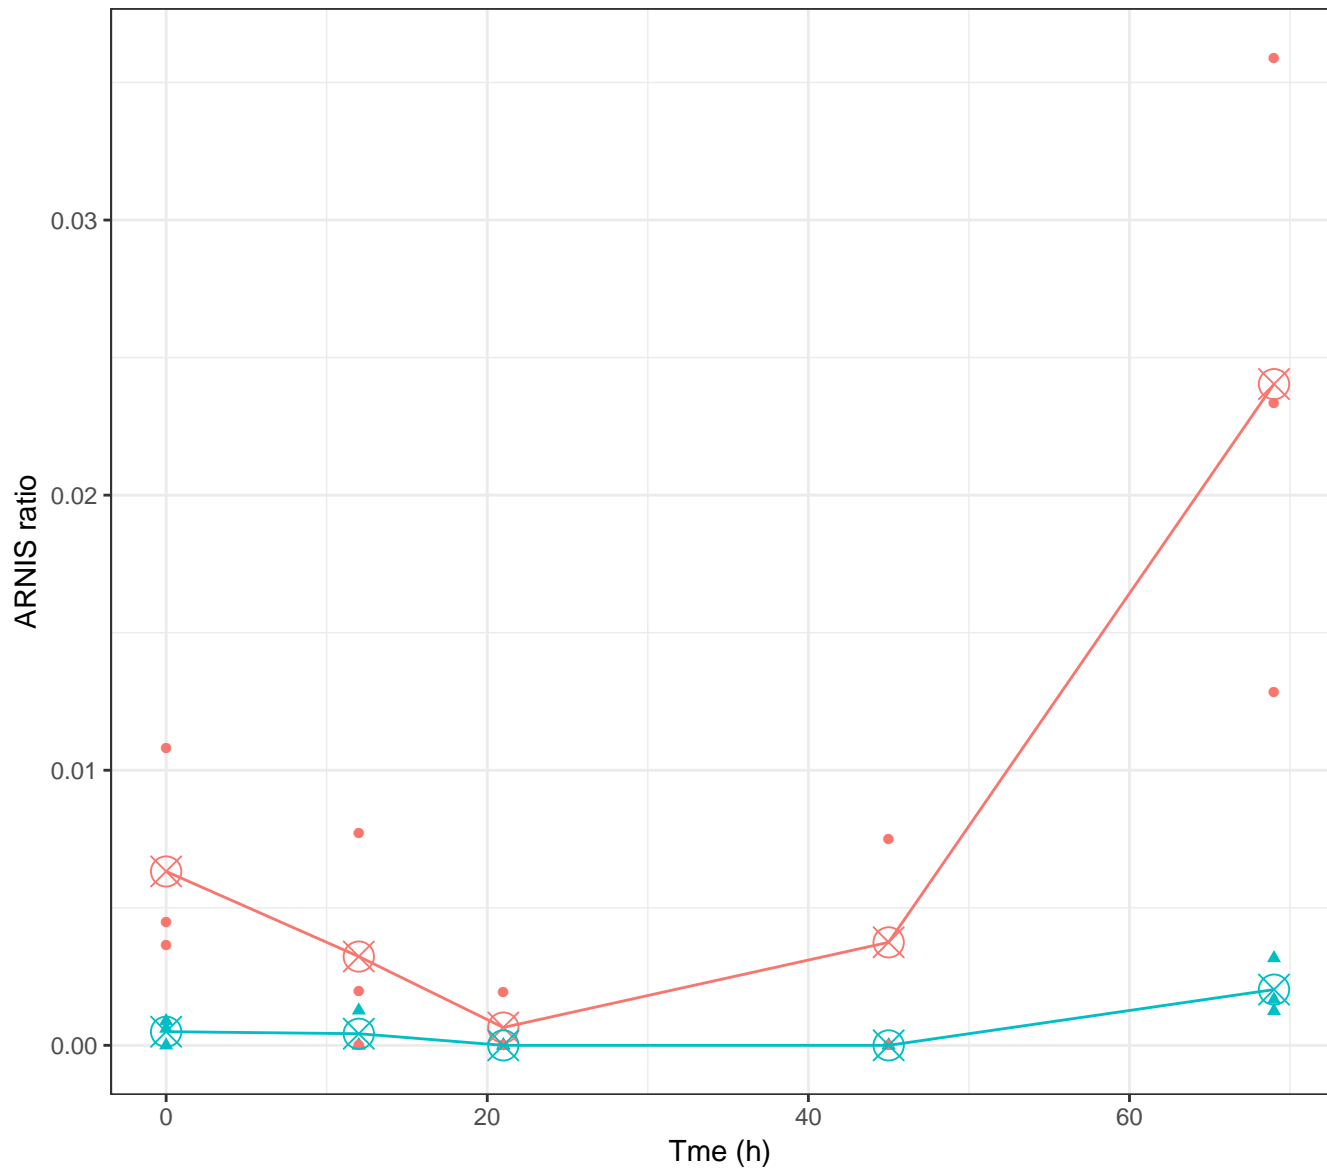

## OTU.671\_Gemmatimonadetes\_Gemmatimonadaceae

Treatment  Control  Filtered-1micron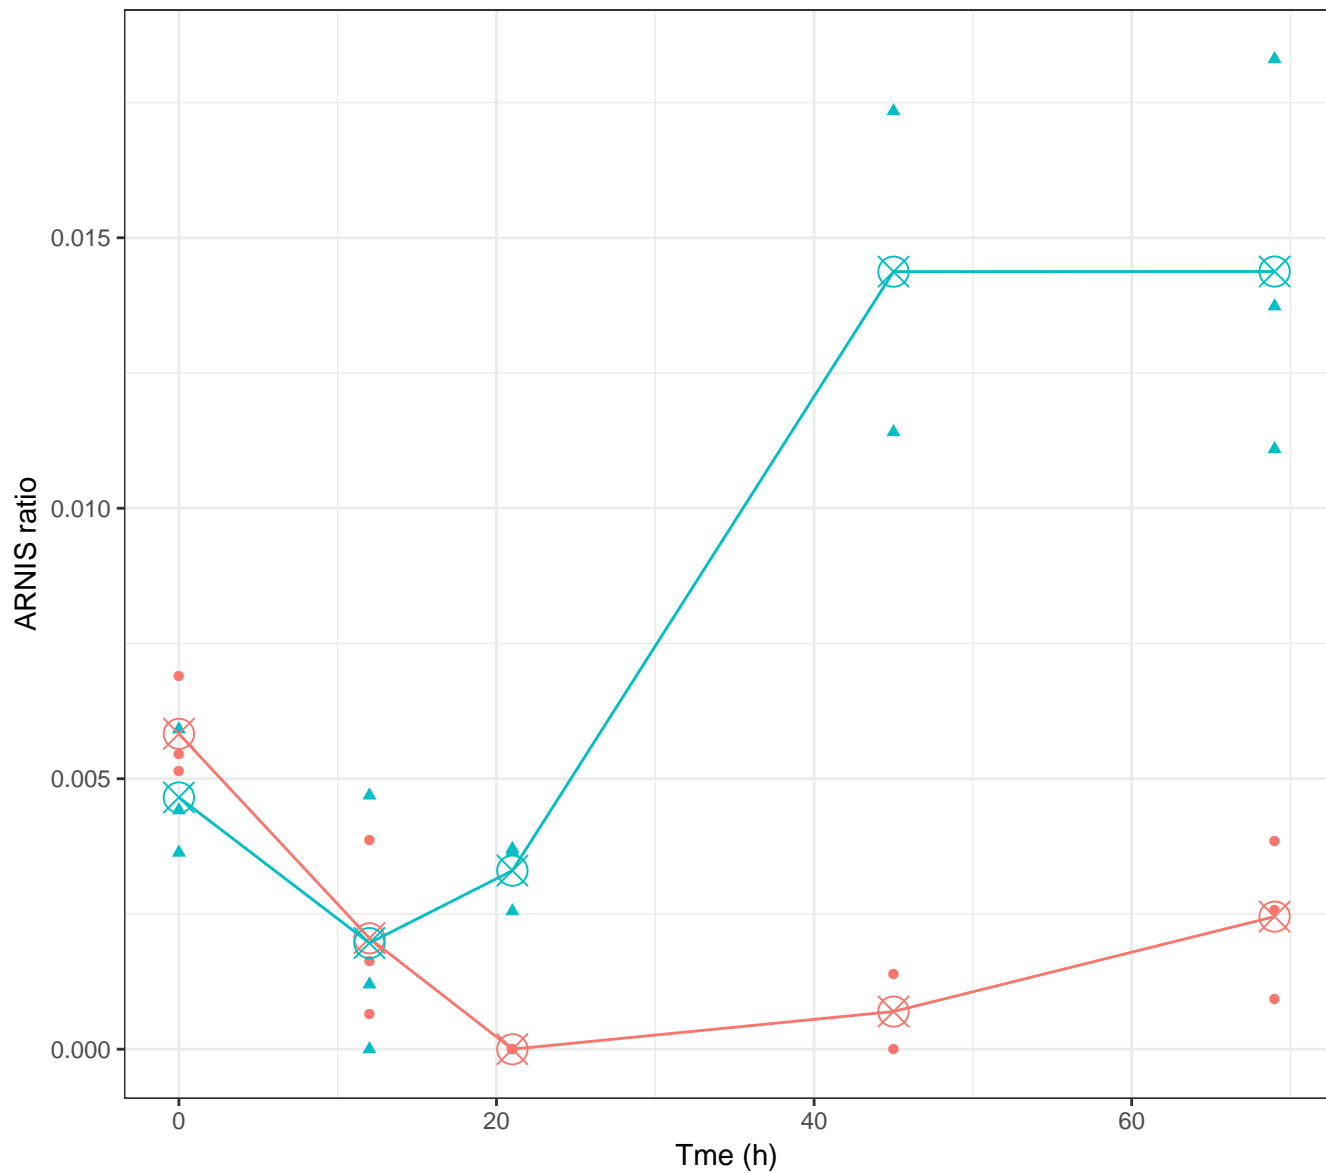

# OTU.632\_Alphaproteobacteria\_SM2D12

Treatment ⊗ Control ⊗ Filtered-1micron

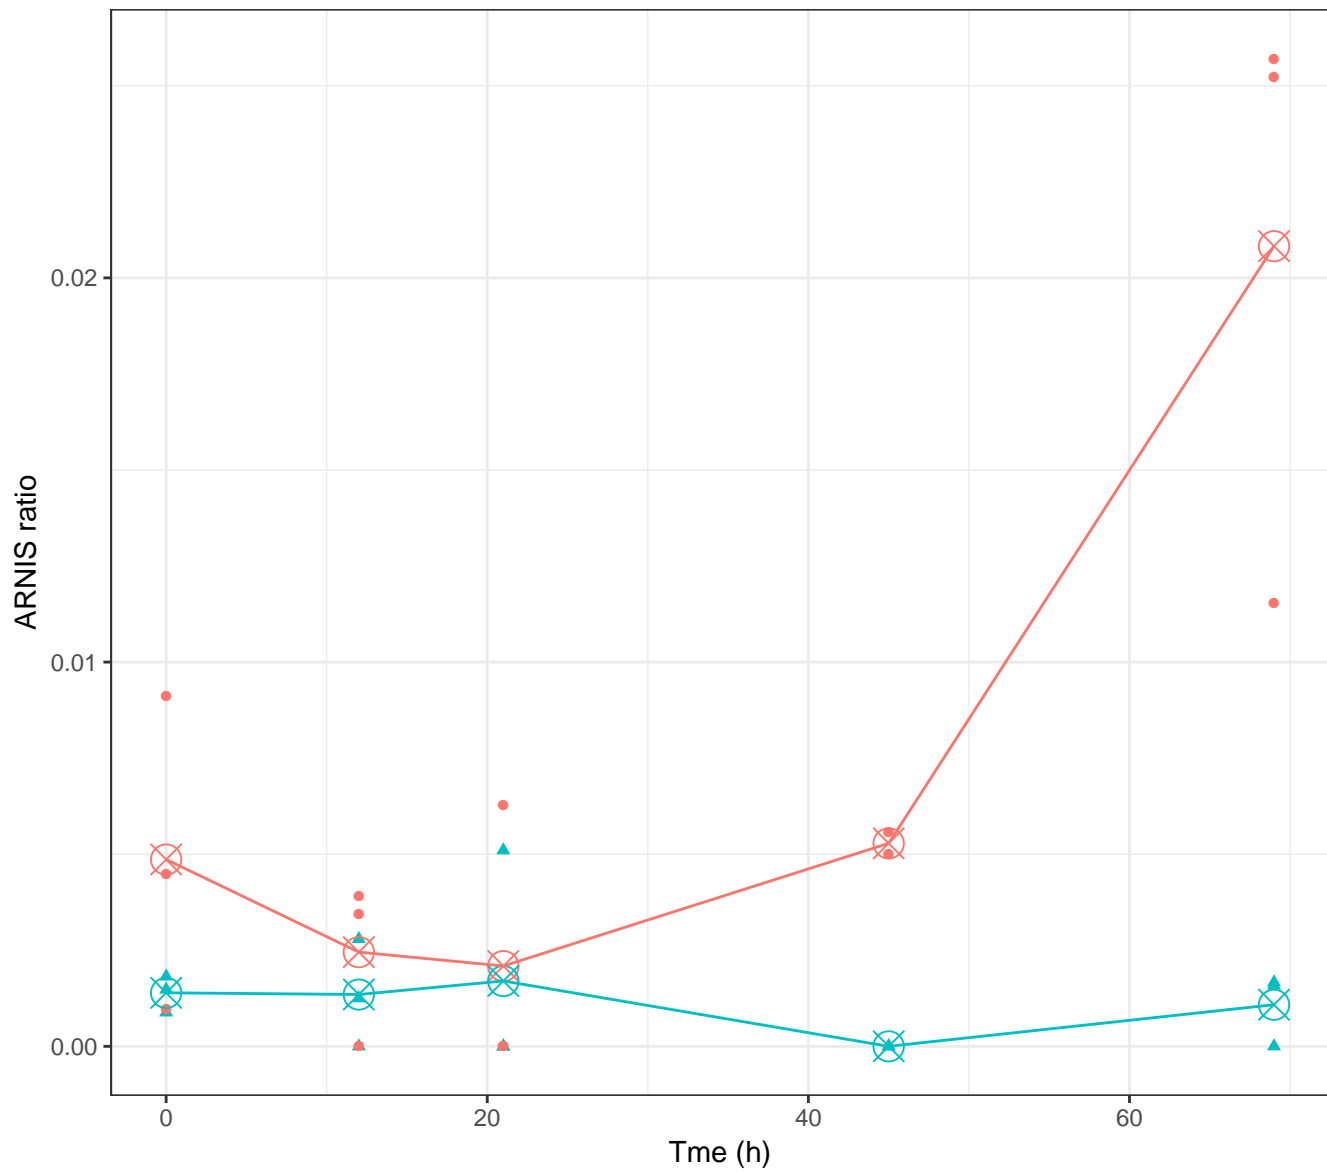

# OTU.768\_Bacteroidetes\_Chitinophagaceae

Treatment Control Filtered-1micron

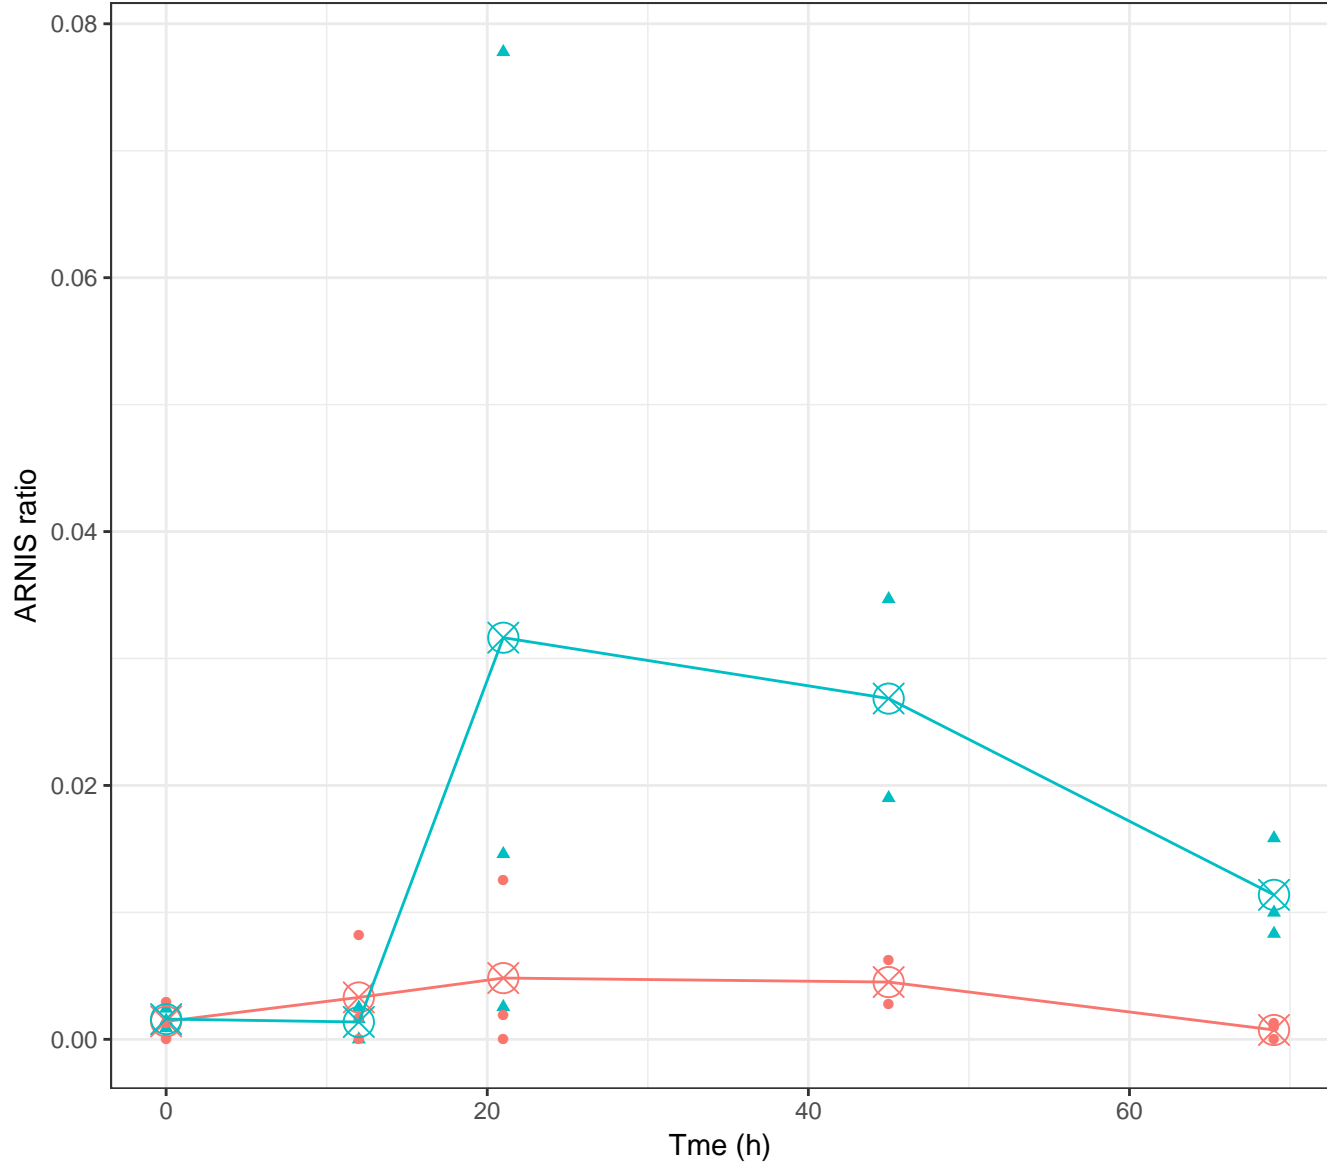

# OTU.683\_Planctomycetes\_Pirellula

Treatment Control Filtered-1micron

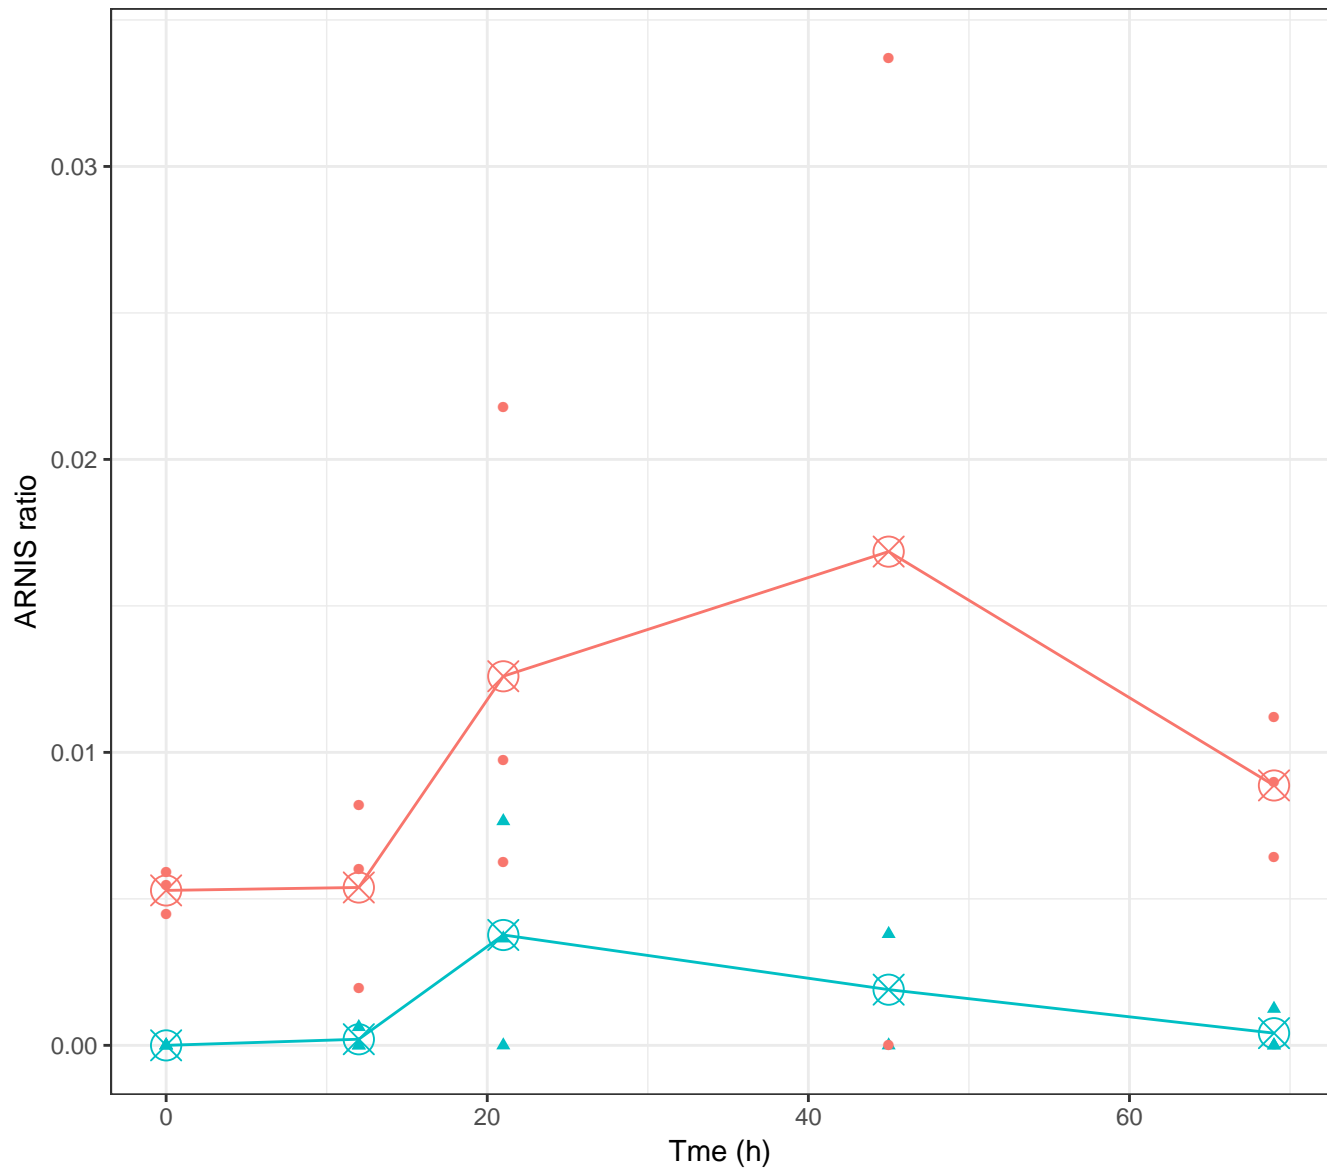

# OTU.8365\_Bacteroidetes\_NS9\_marine\_group

Treatment Control Filtered-1micron

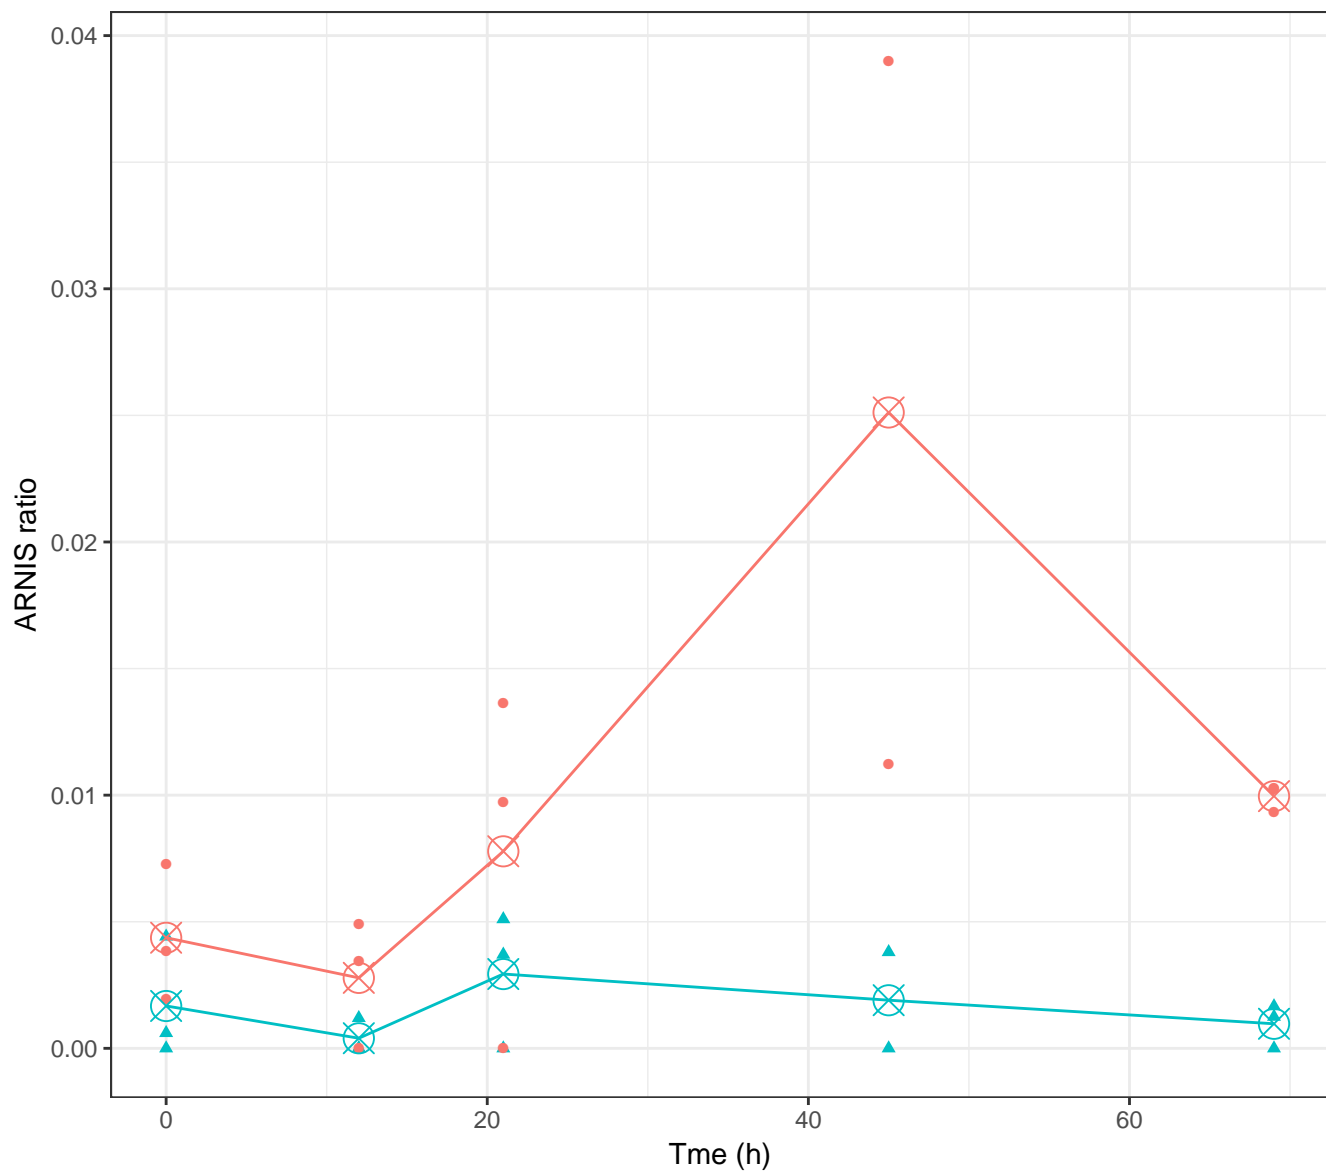

# OTU.7900\_Actinobacteria\_Candidatus\_Planktophilia

Treatment Control Filtered-1micron

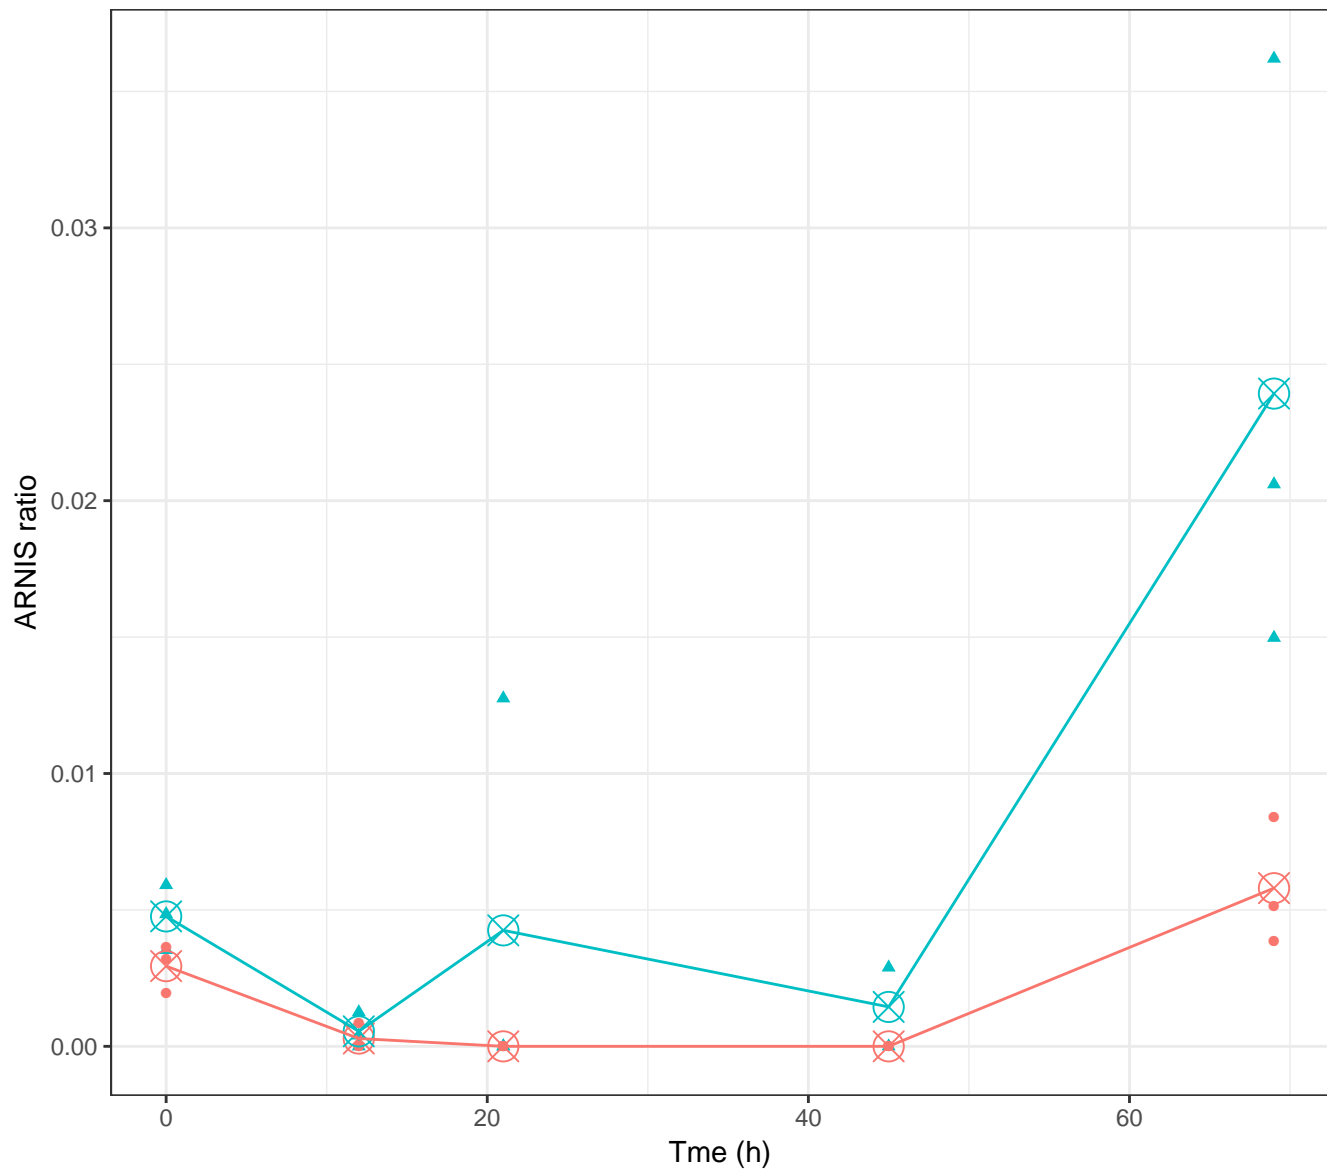

# OTU.667\_Bacteroidetes\_NS11.12marinegroup

Treatment Control Filtered-1micron

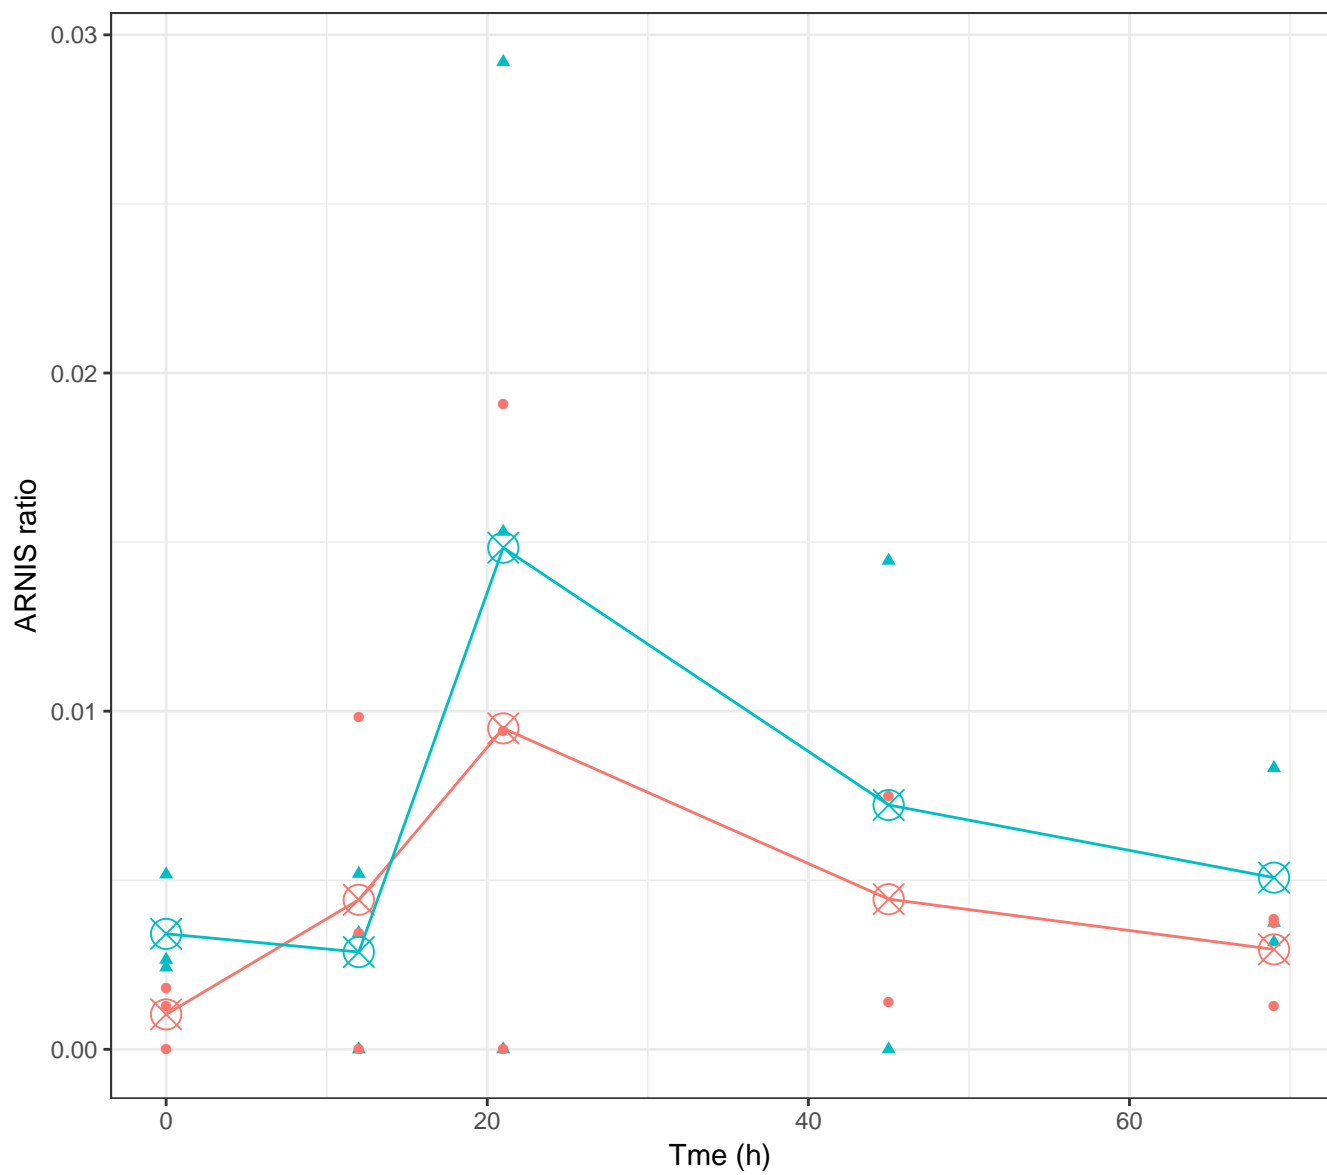



# OTU.1673\_Actinobacteria\_clade\_acl.C

Treatment Control Filtered-1micron

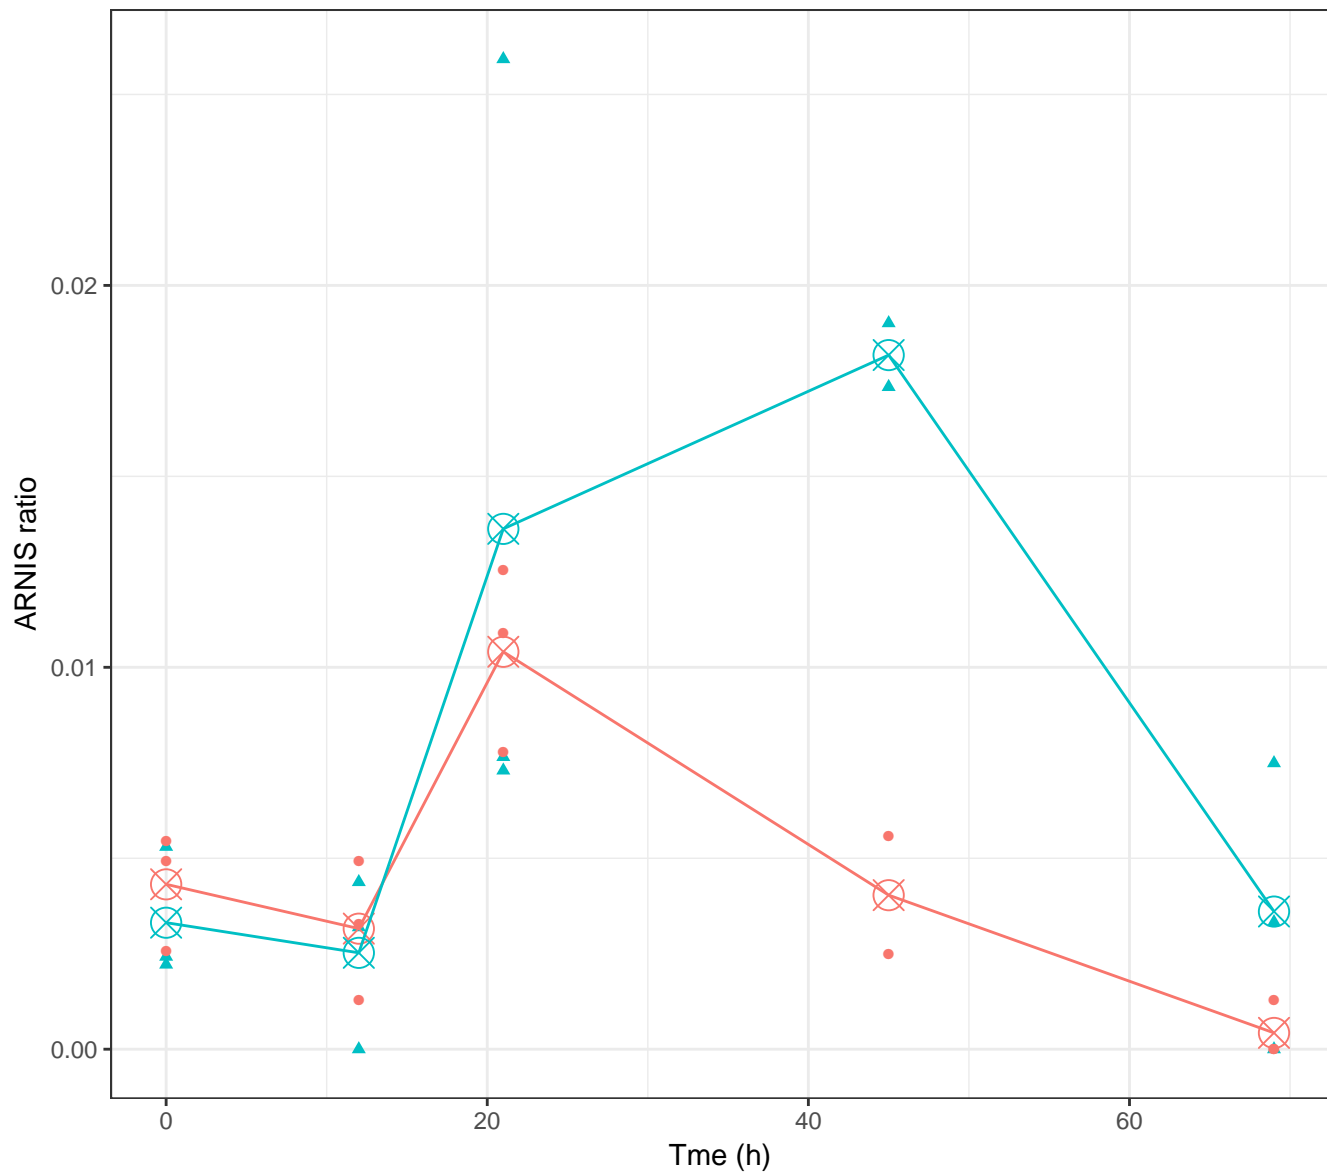

# OTU.679\_Deltaproteobacteria\_Oligoflexales

Treatment ⊗ Control ⊗ Filtered-1micron

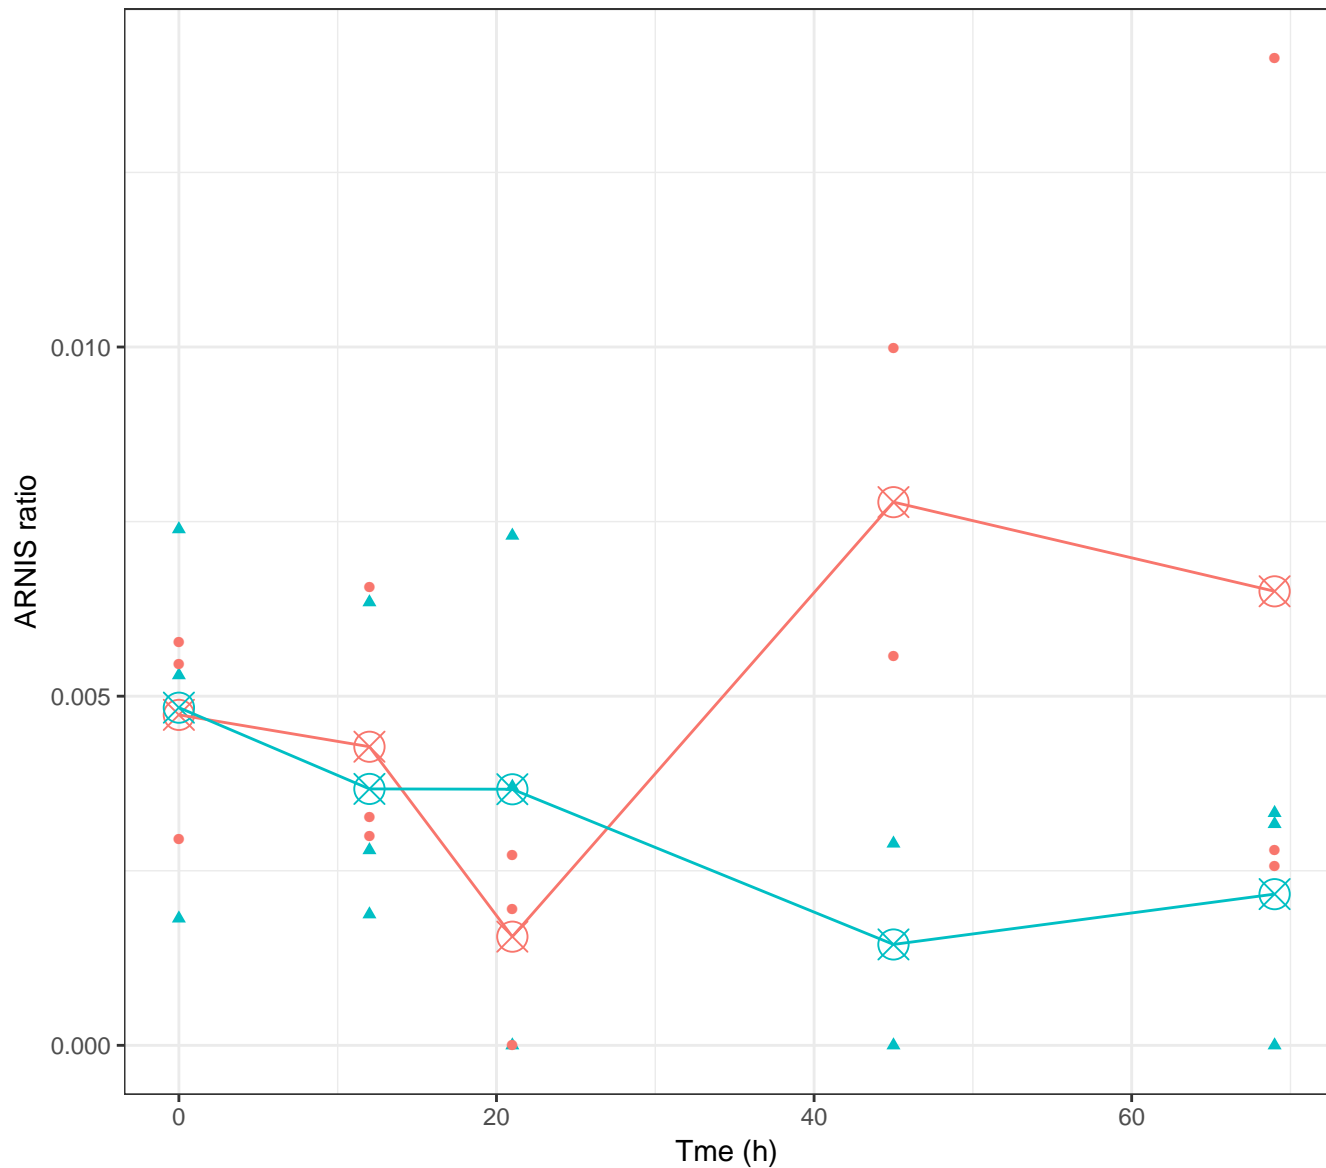

# OTU.3432\_Actinobacteria\_Candidatus\_Limnoluna

Treatment ⊗ Control ⊗ Filtered-1micron

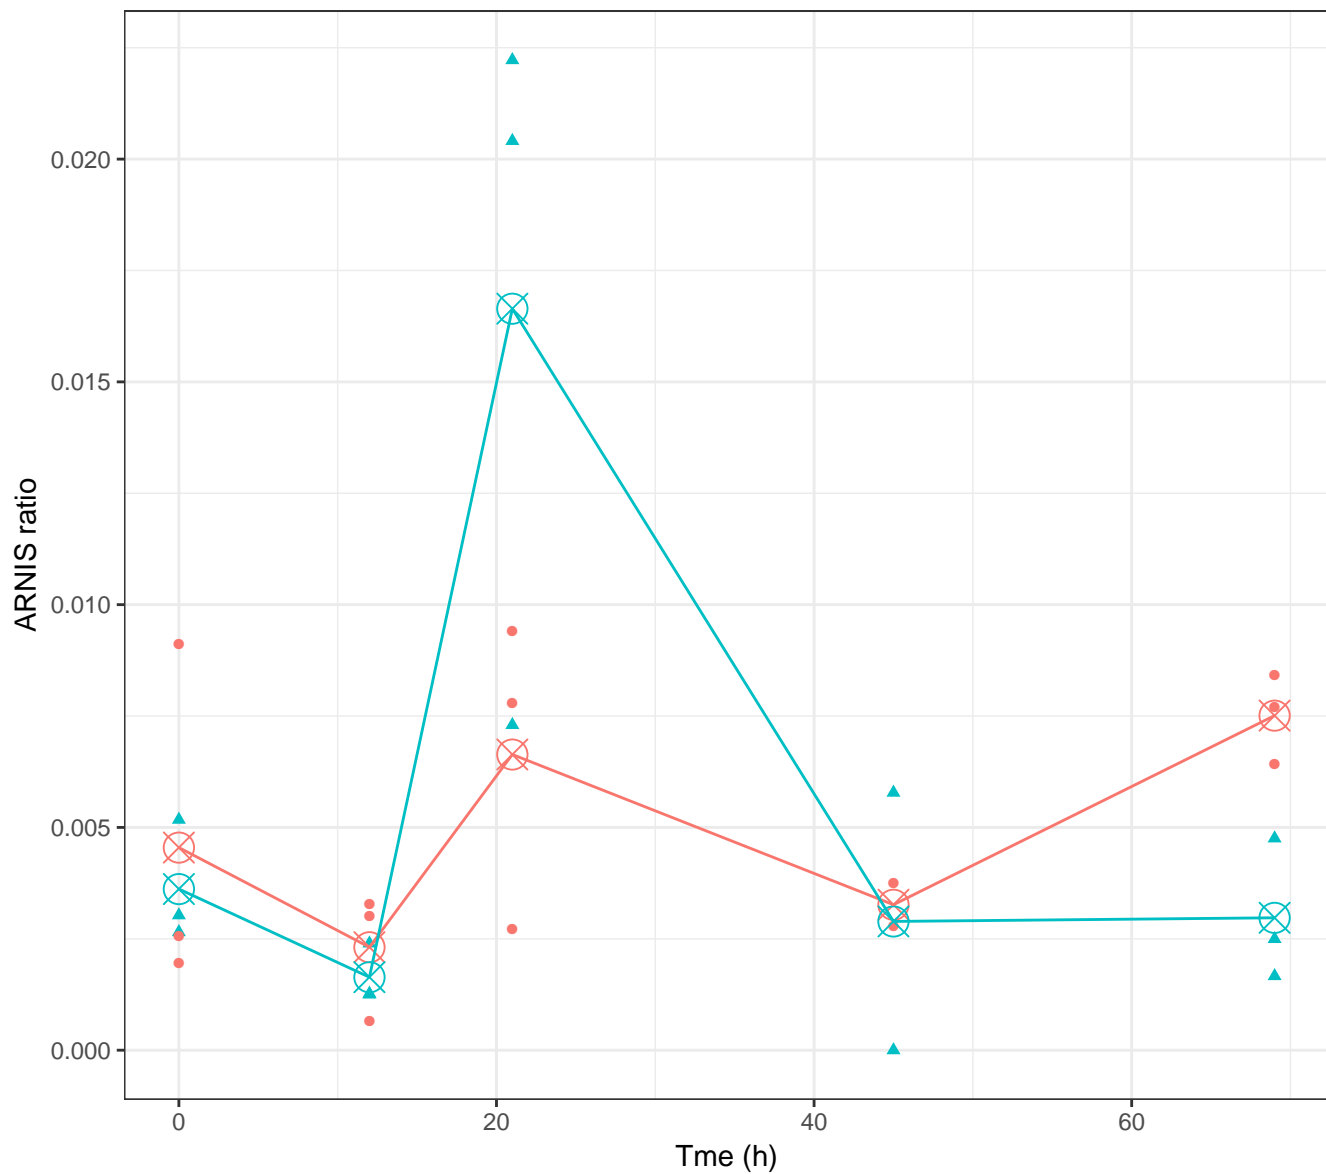

# OTU.330\_Bacteroidetes\_Sphingobacteriales

Treatment Control Filtered-1micron

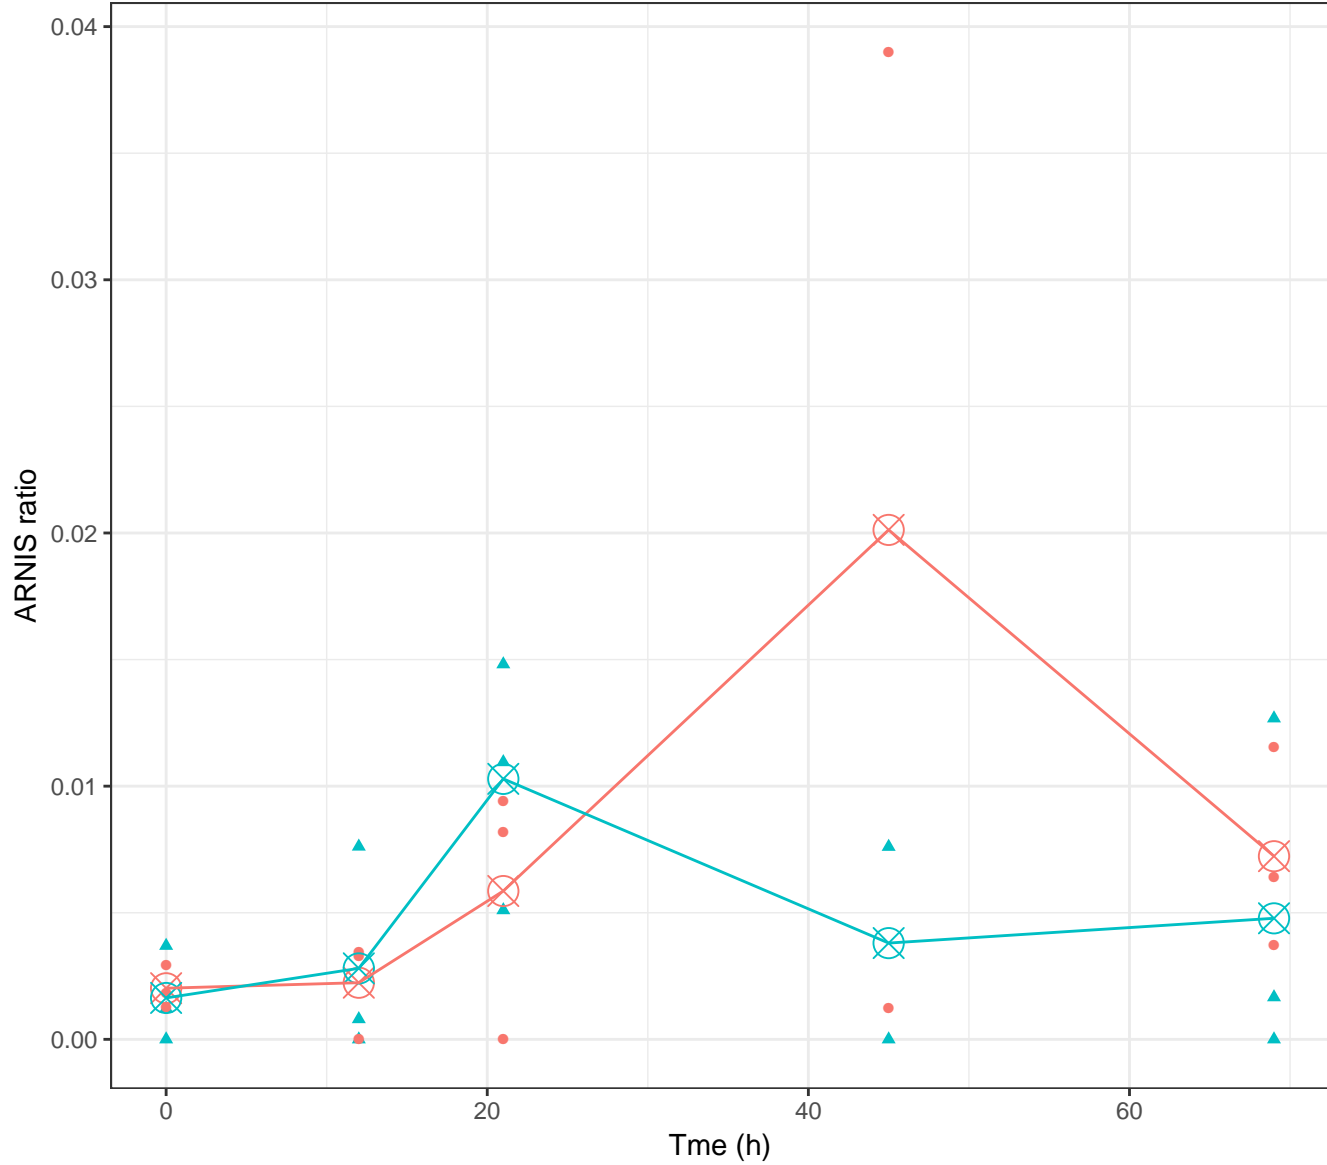

# OTU.2898\_Betaproteobacteria\_Comamonadaceae

Treatment ⊗ Control ⊗ Filtered-1micron

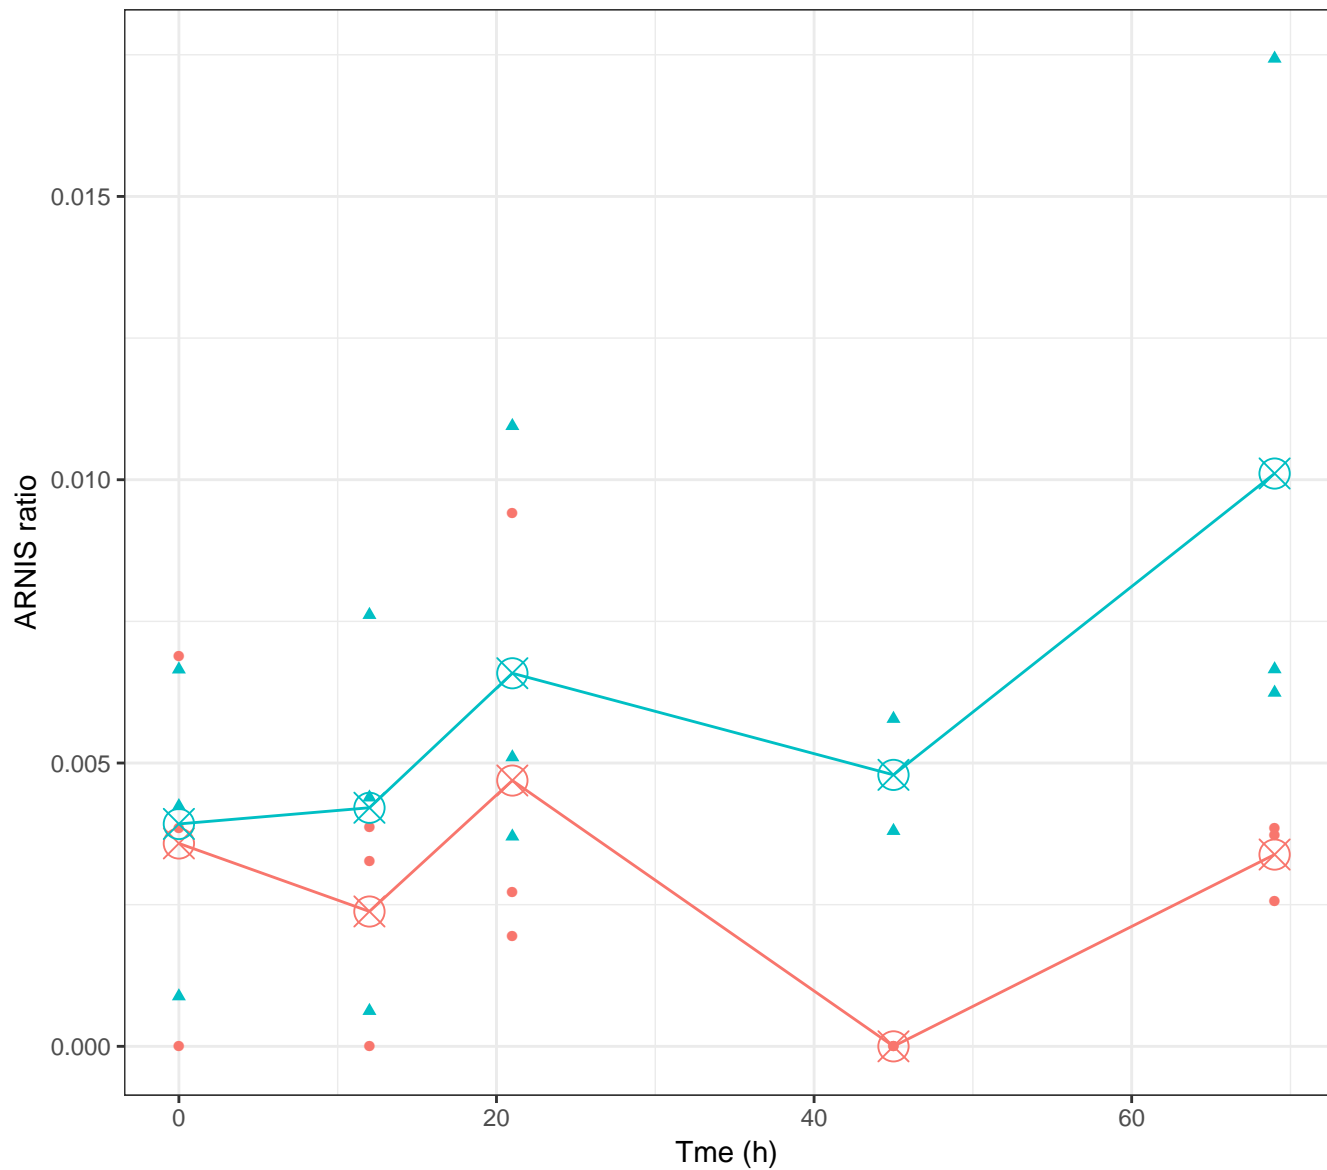

# OTU.290\_Deltaproteobacteria\_Peridibacter

Treatment Control Filtered-1micron

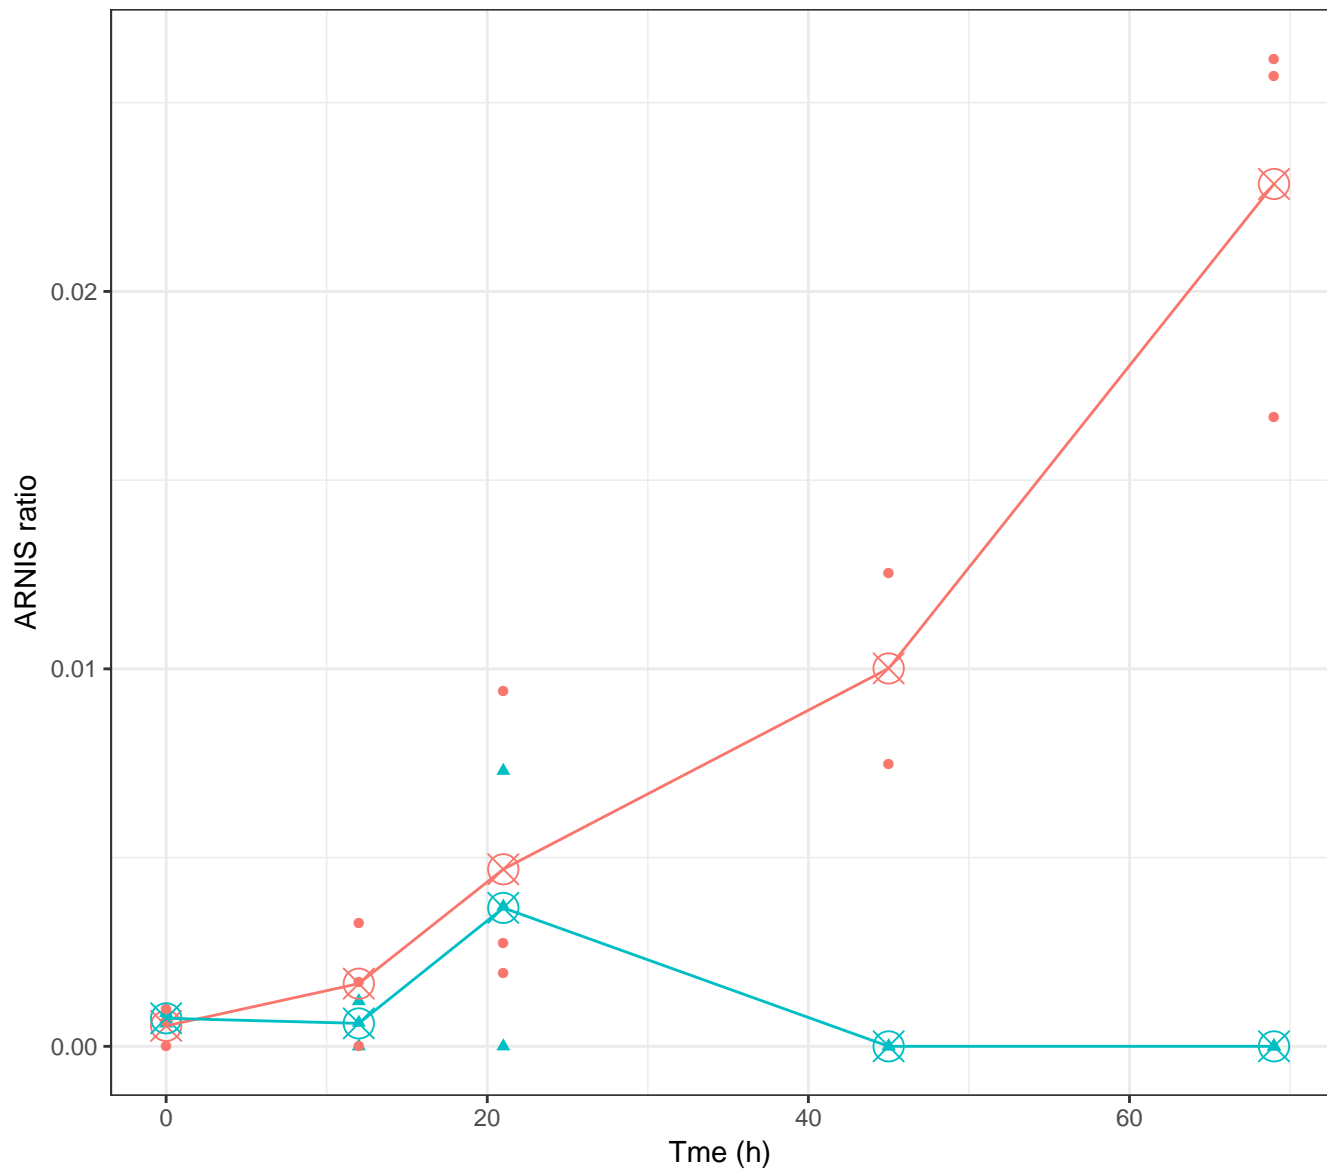

# OTU.790\_Gammaproteobacteria\_Legionella

Treatment Control Filtered-1micron

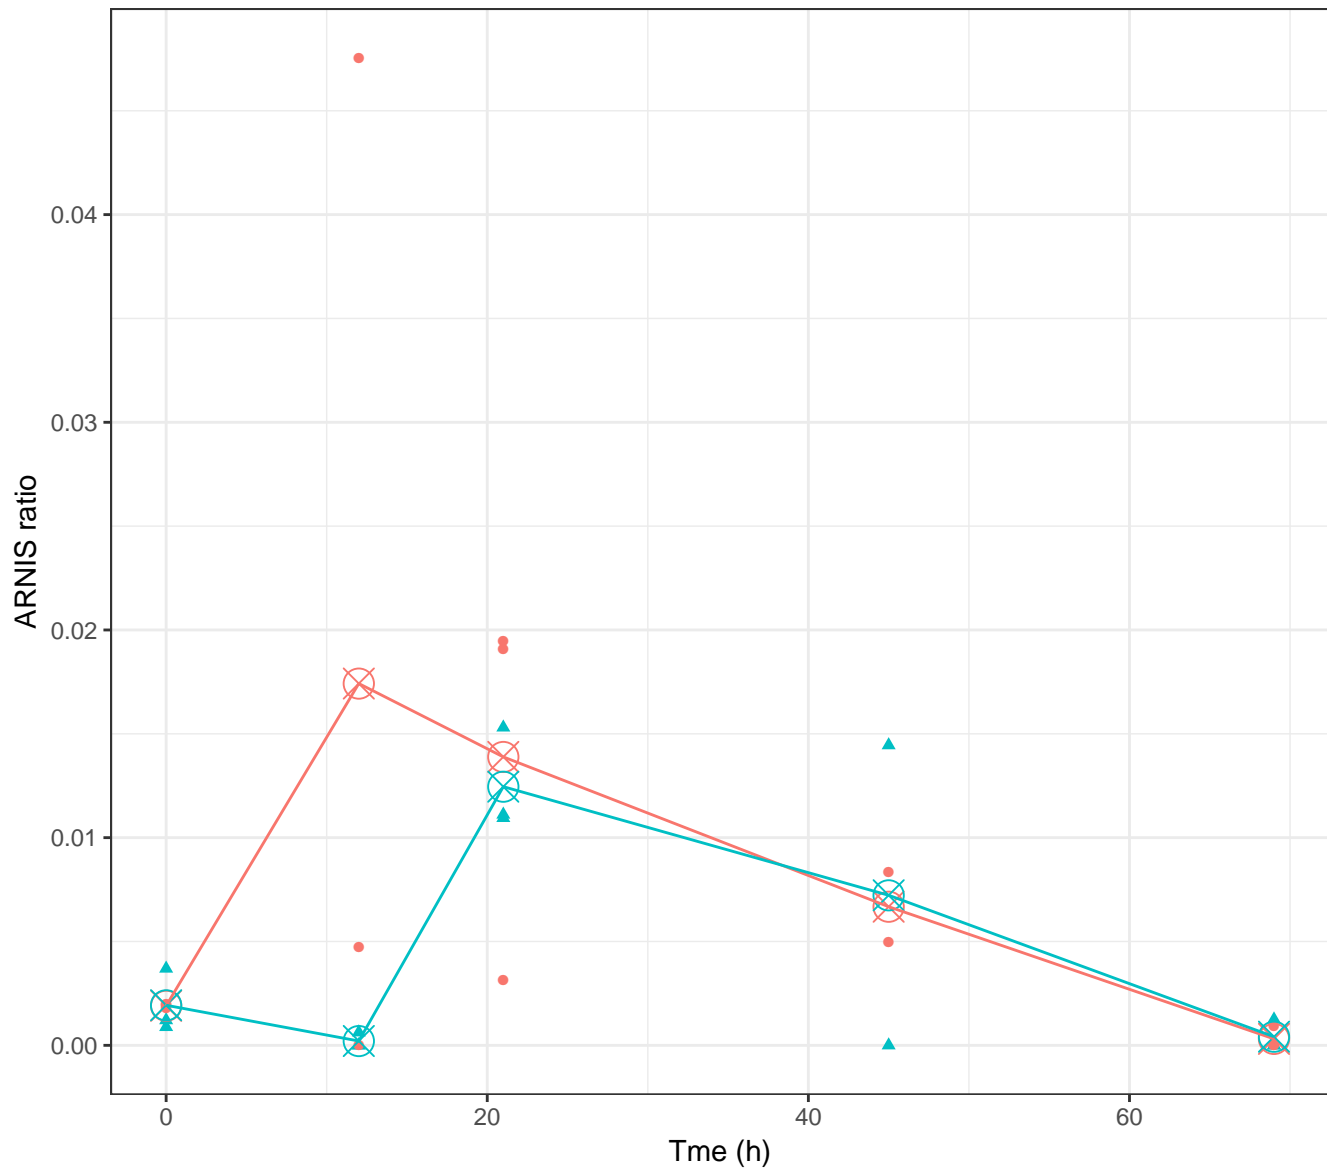

# OTU.3058\_Betaproteobacteria\_Comamonadaceae

Treatment Control Filtered-1micron

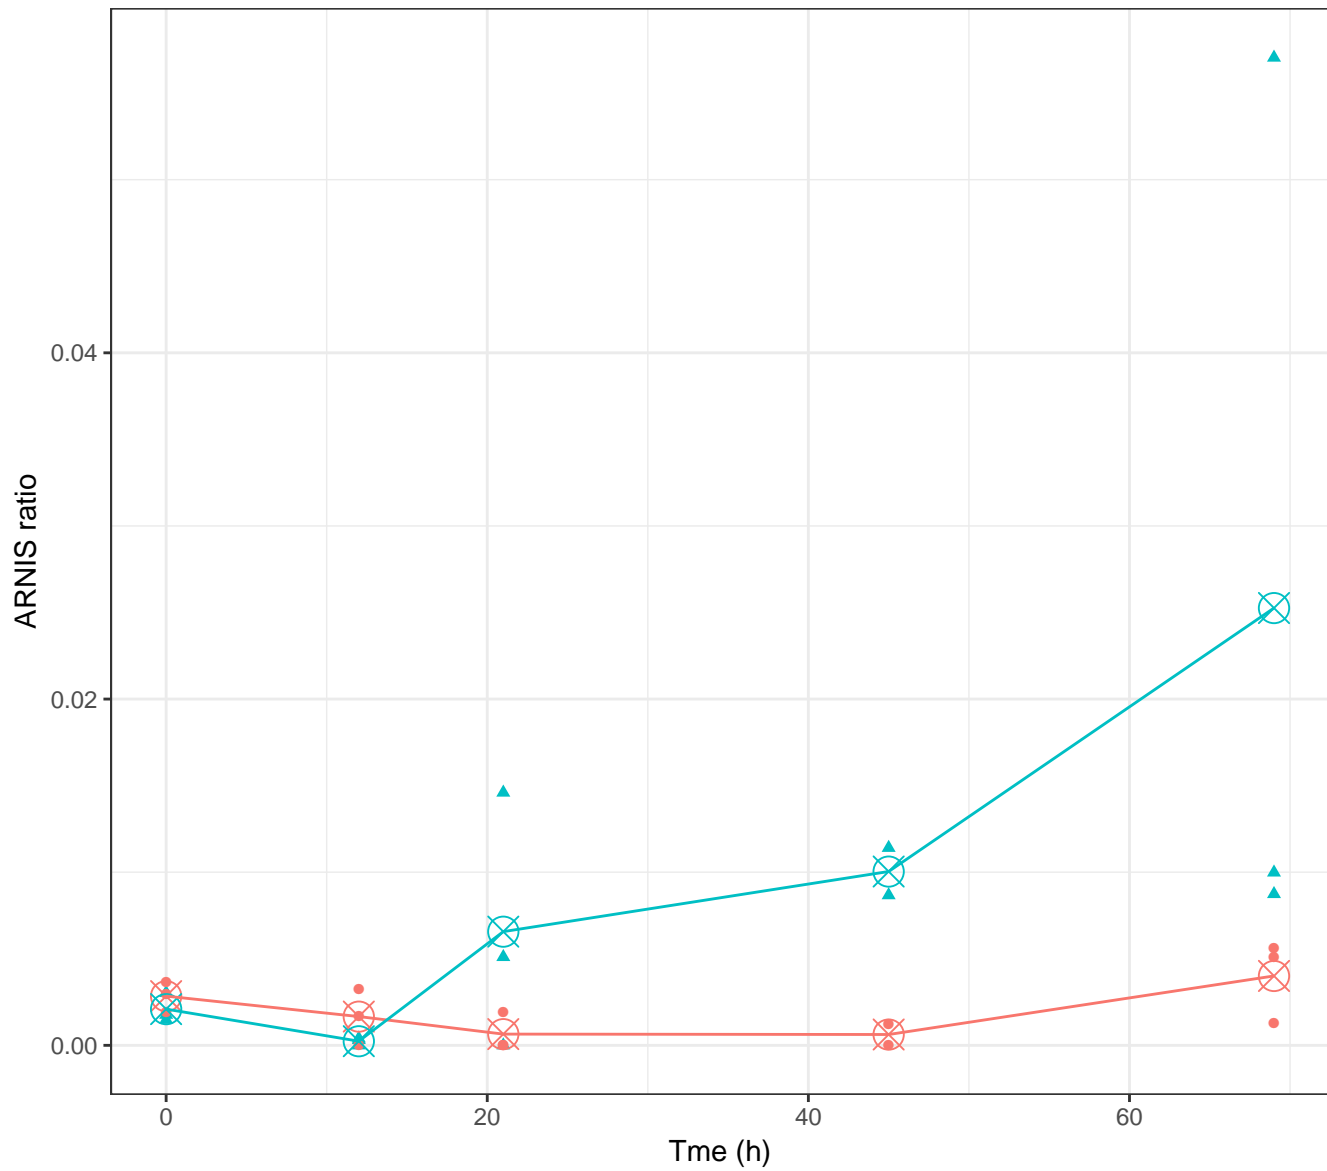



# OTU.820\_Betaproteobacteria\_Duganella

Treatment Control Filtered-1micron

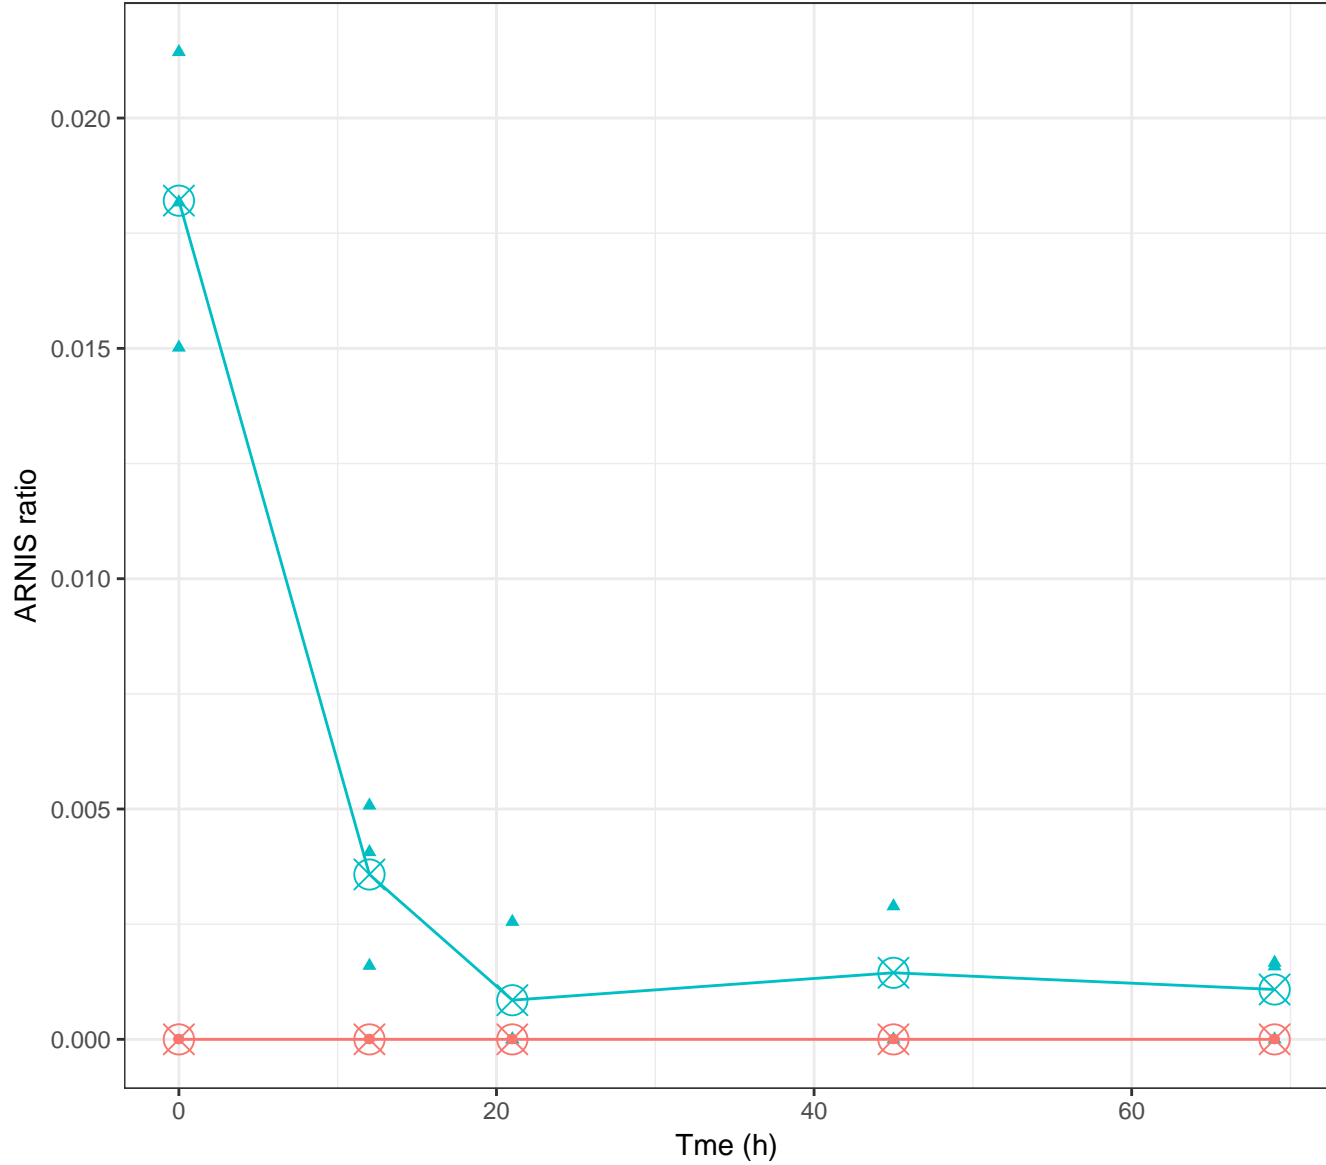

# OTU.604\_Bacteroidetes\_Chryseobacterium

Treatment Control Filtered-1micron

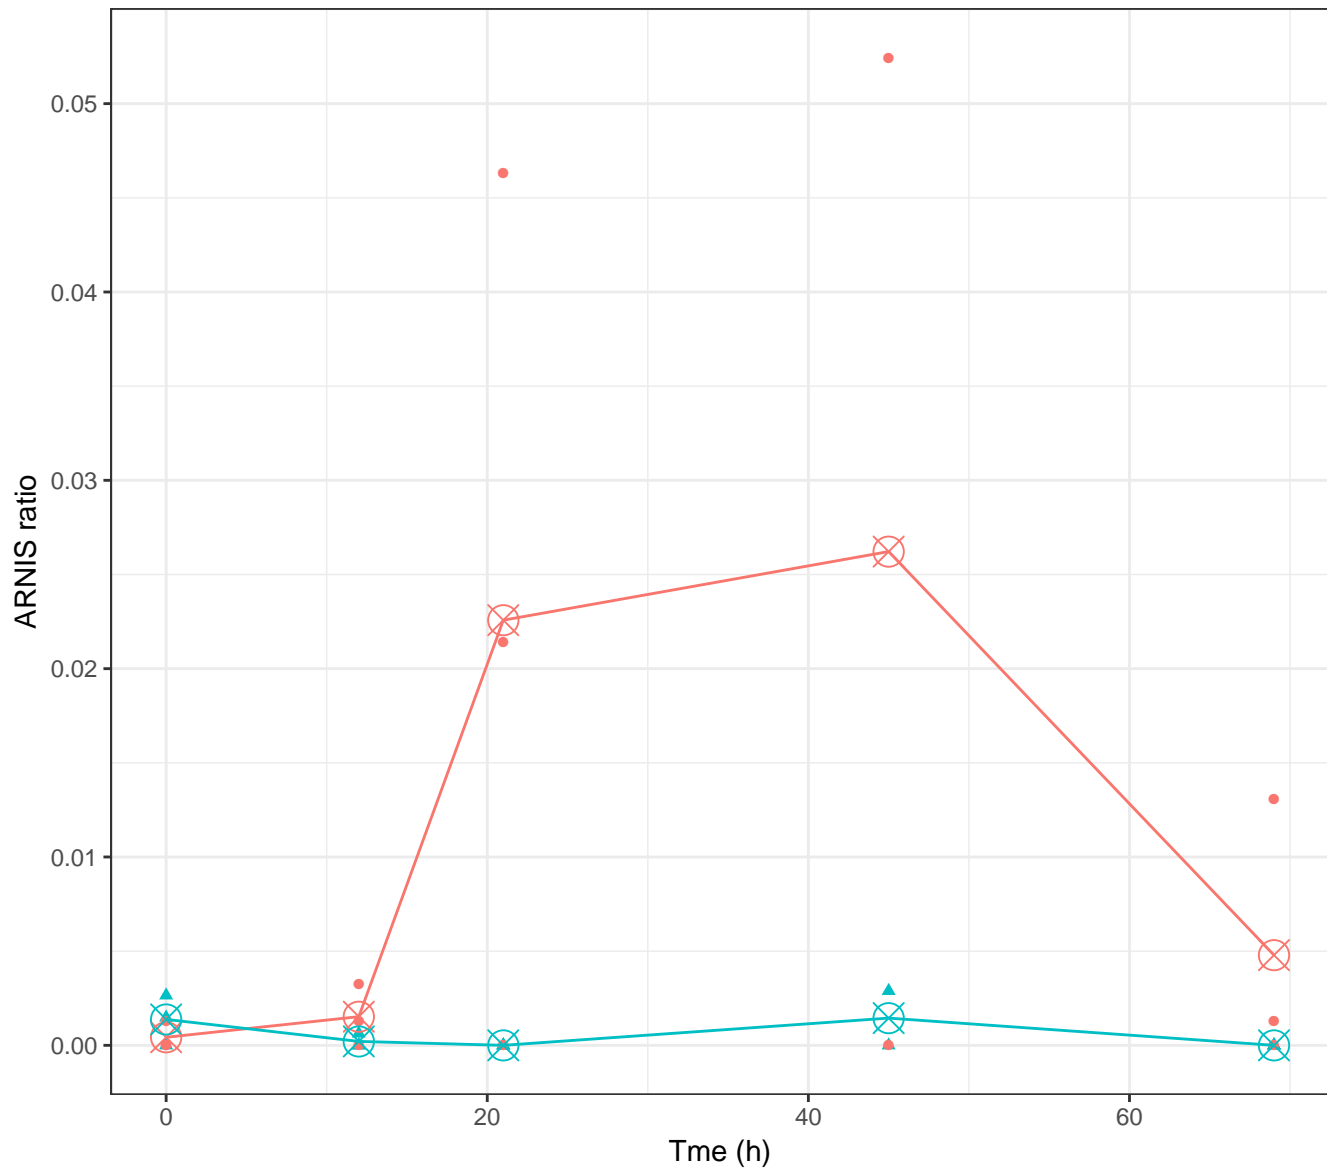

# OTU.754\_Verrucomicrobia\_Luteolibacter

Treatment Control Filtered-1micron

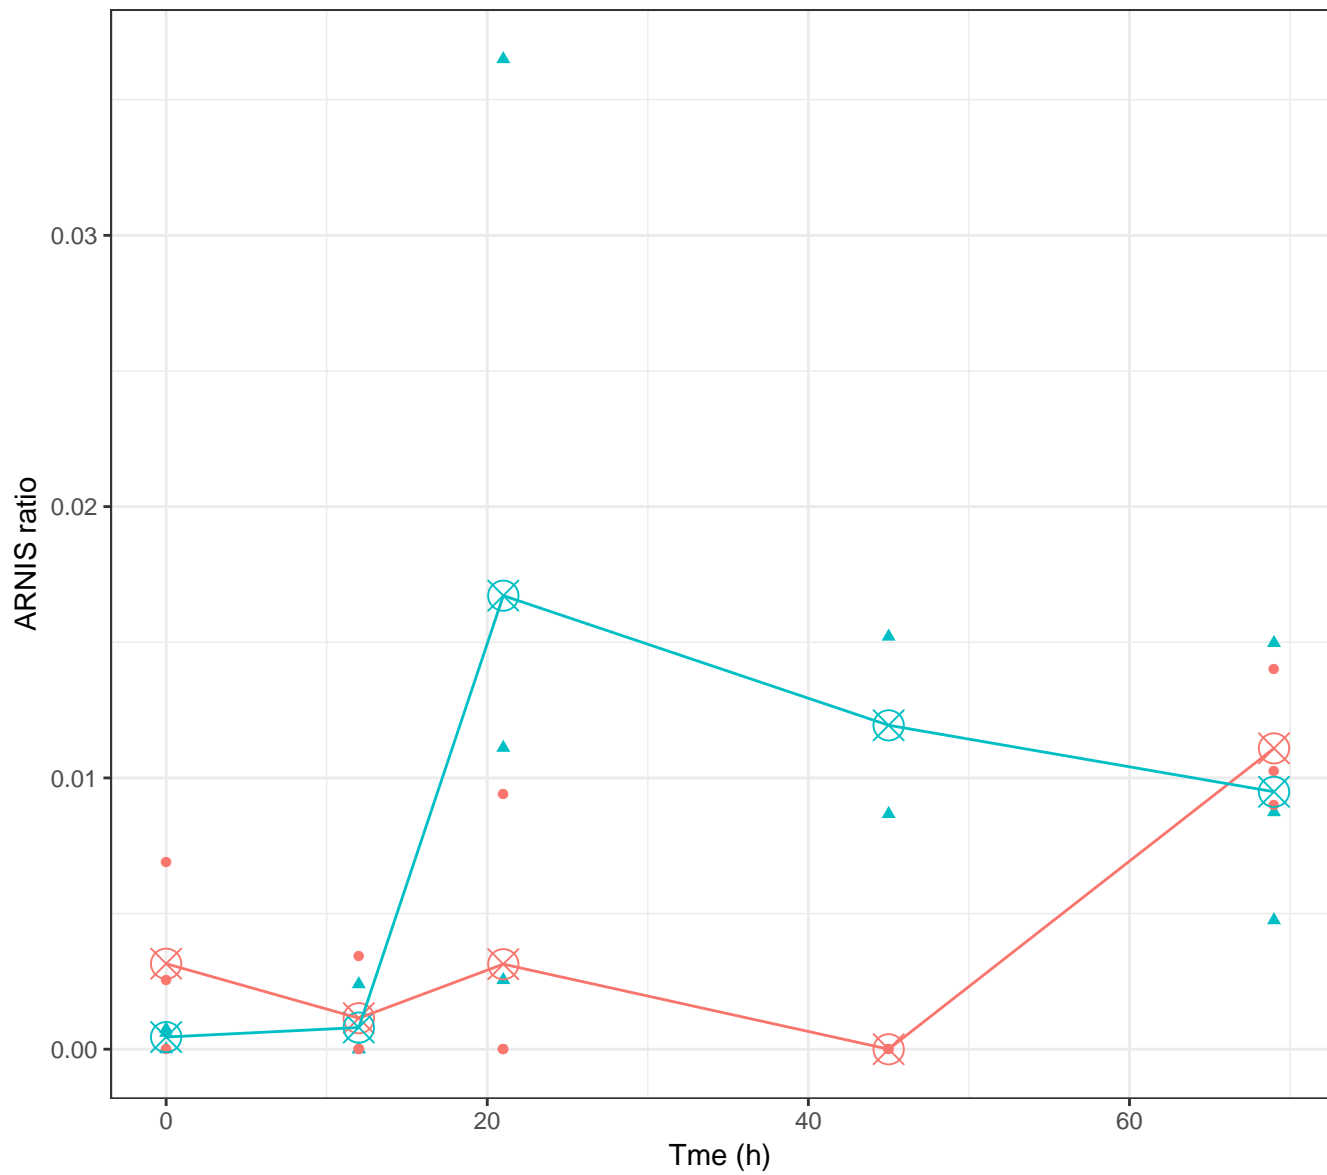

# OTU.5380\_Actinobacteria.clade\_acl.B2.4

Treatment ⊗ Control ⊗ Filtered-1micron

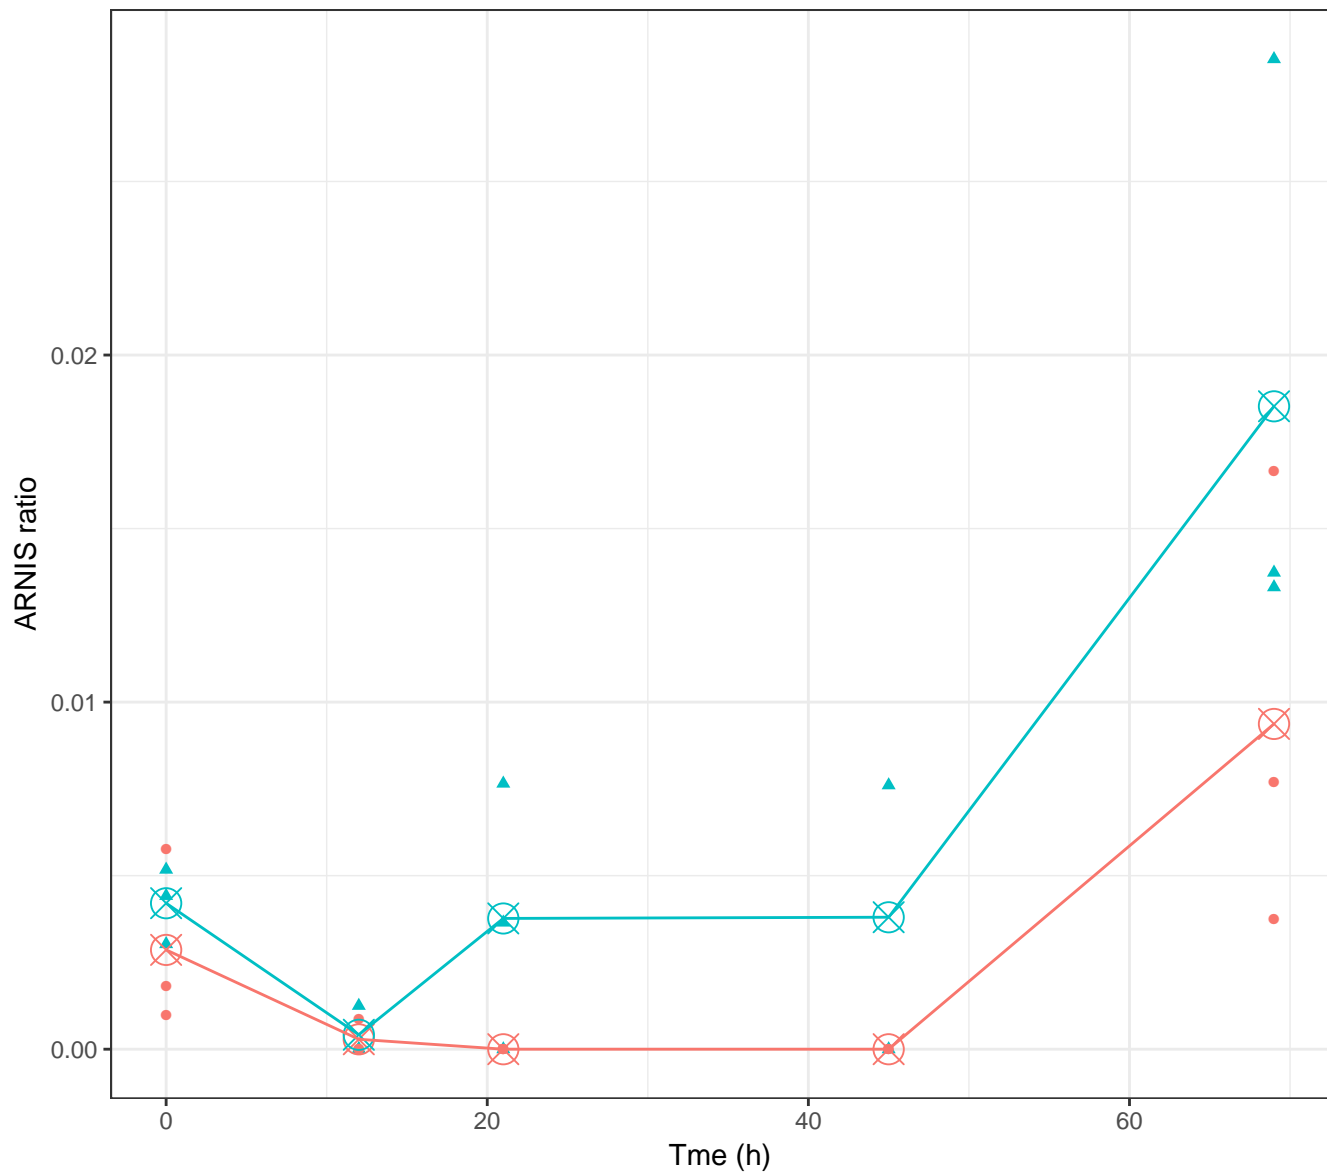

## OTU.653\_Planctomyces\_CL500.3

Treatment  Control  Filtered-1micron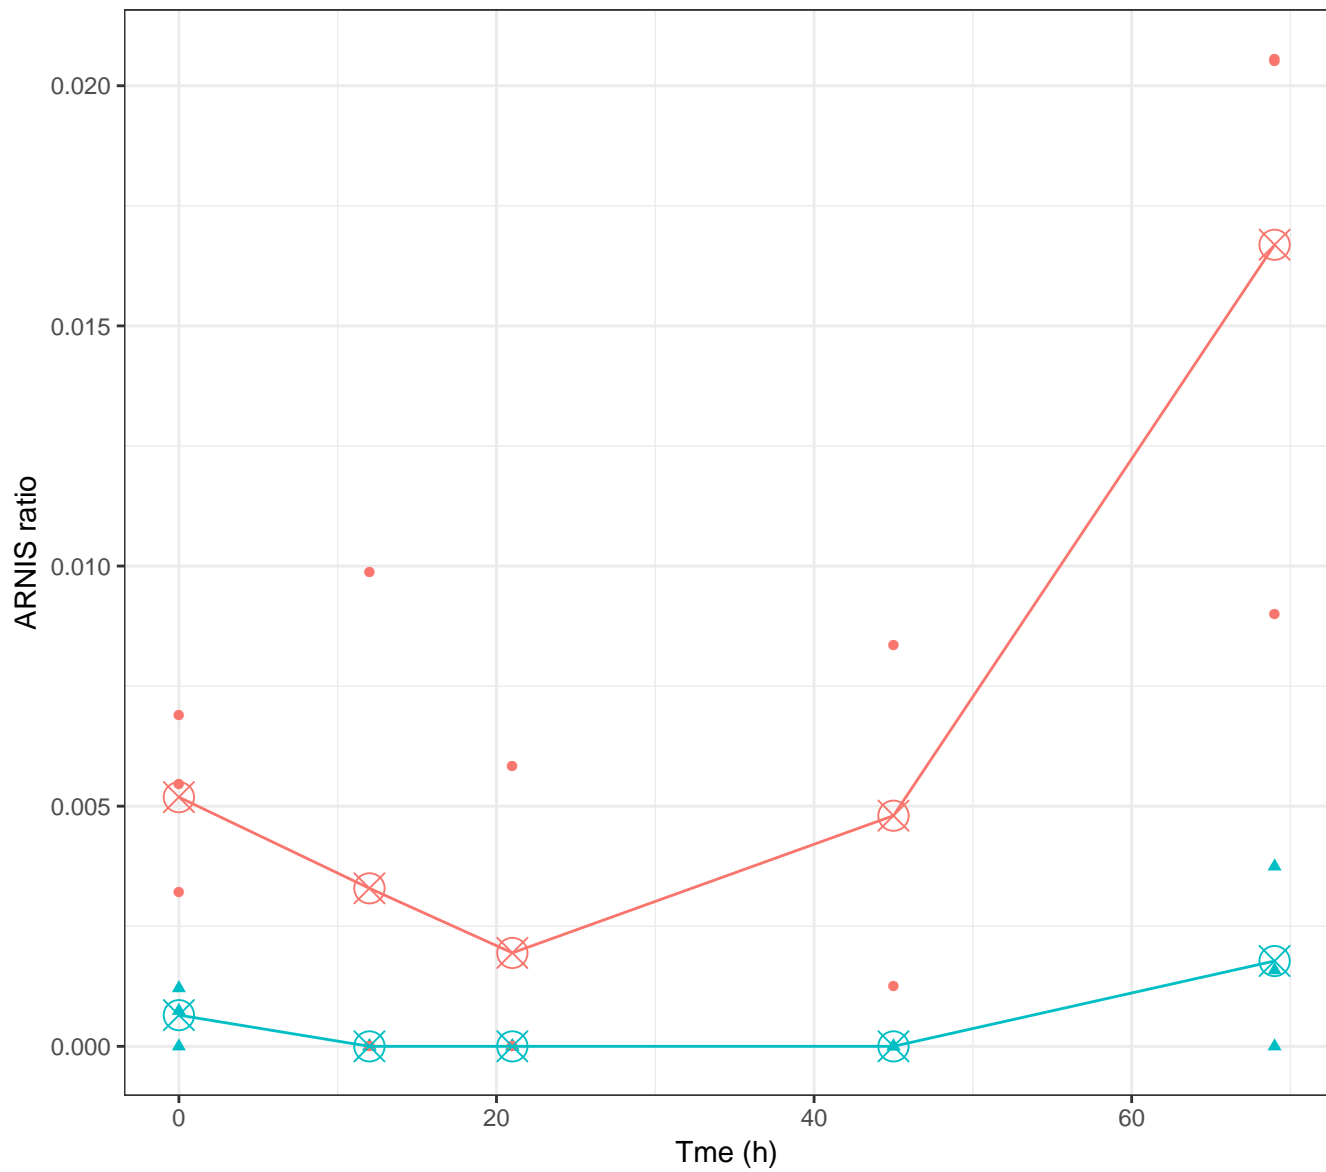

# OTU.3286\_Verrucomicrobia\_Prostheco bacter

Treatment  Control  Filtered-1micron

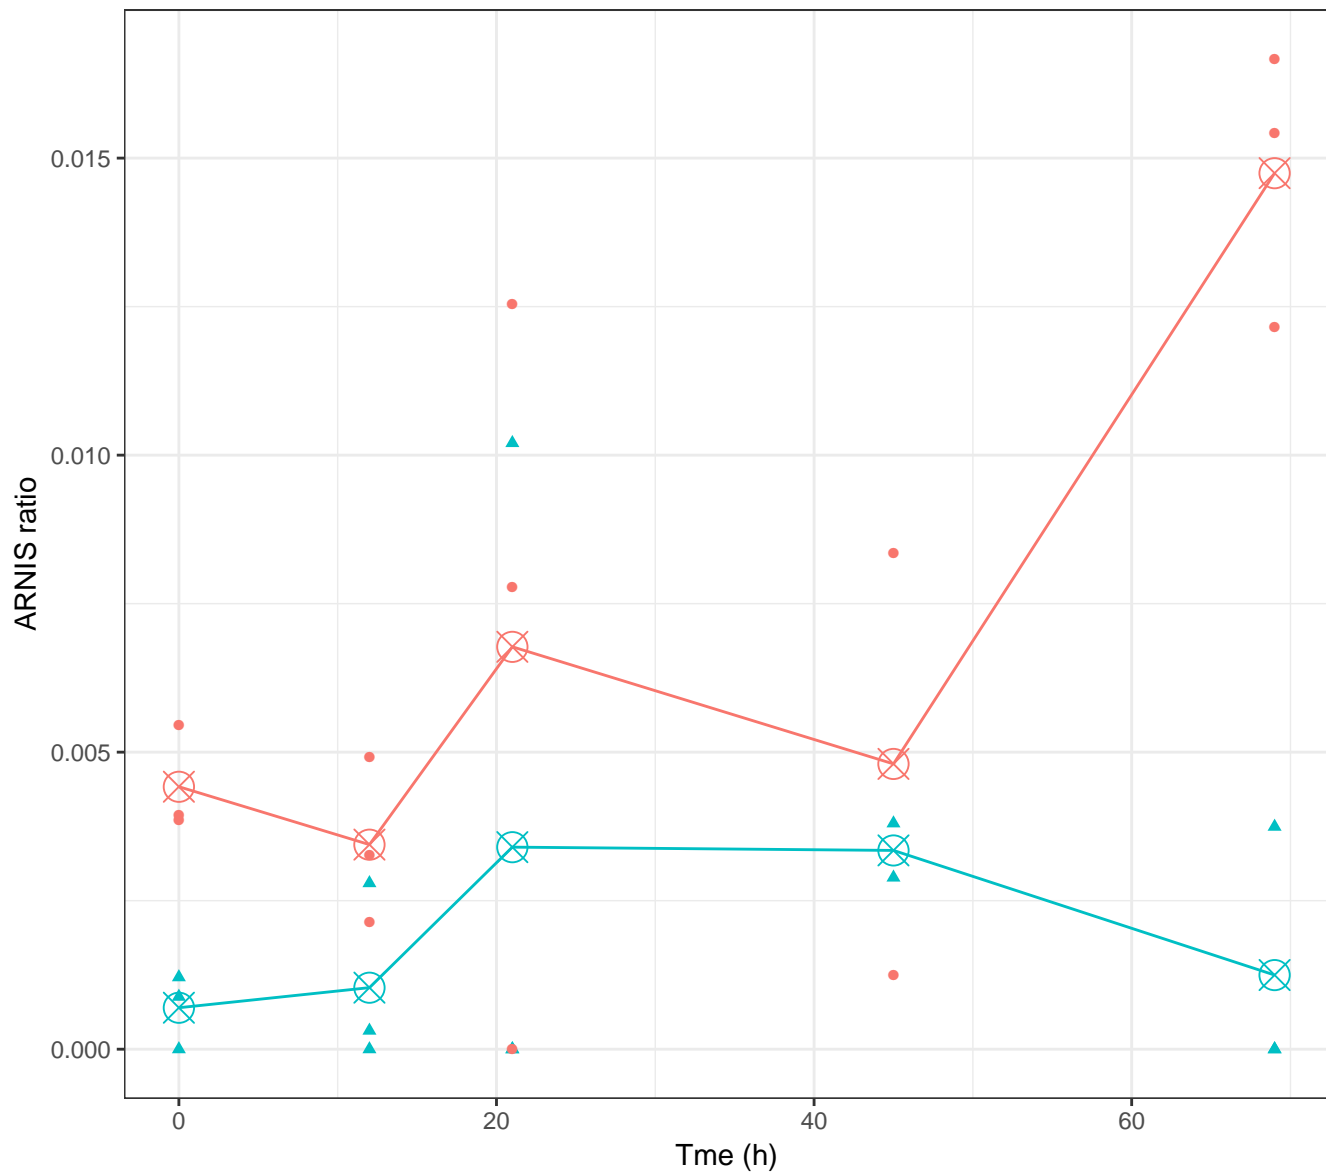

# OTU.726\_Bacteroidetes\_Sphingobacteriaceae

Treatment ⊗ Control ⊗ Filtered-1micron

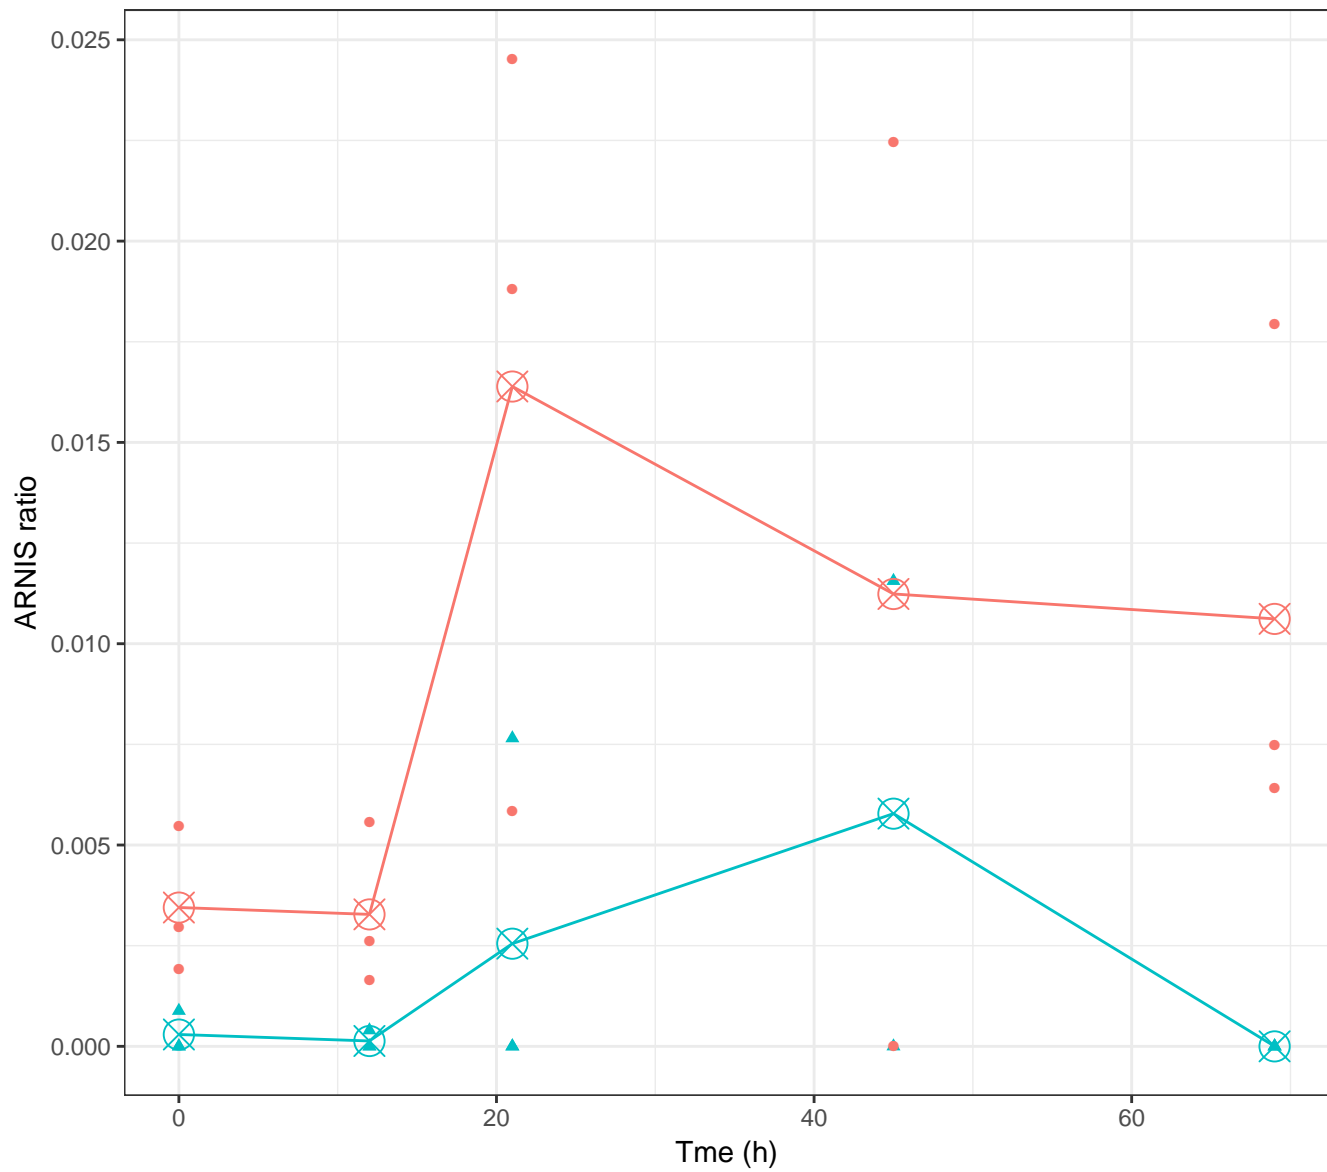

# OTU.98\_Actinobacteria\_Mycobacterium

Treatment  Control  Filtered-1micron

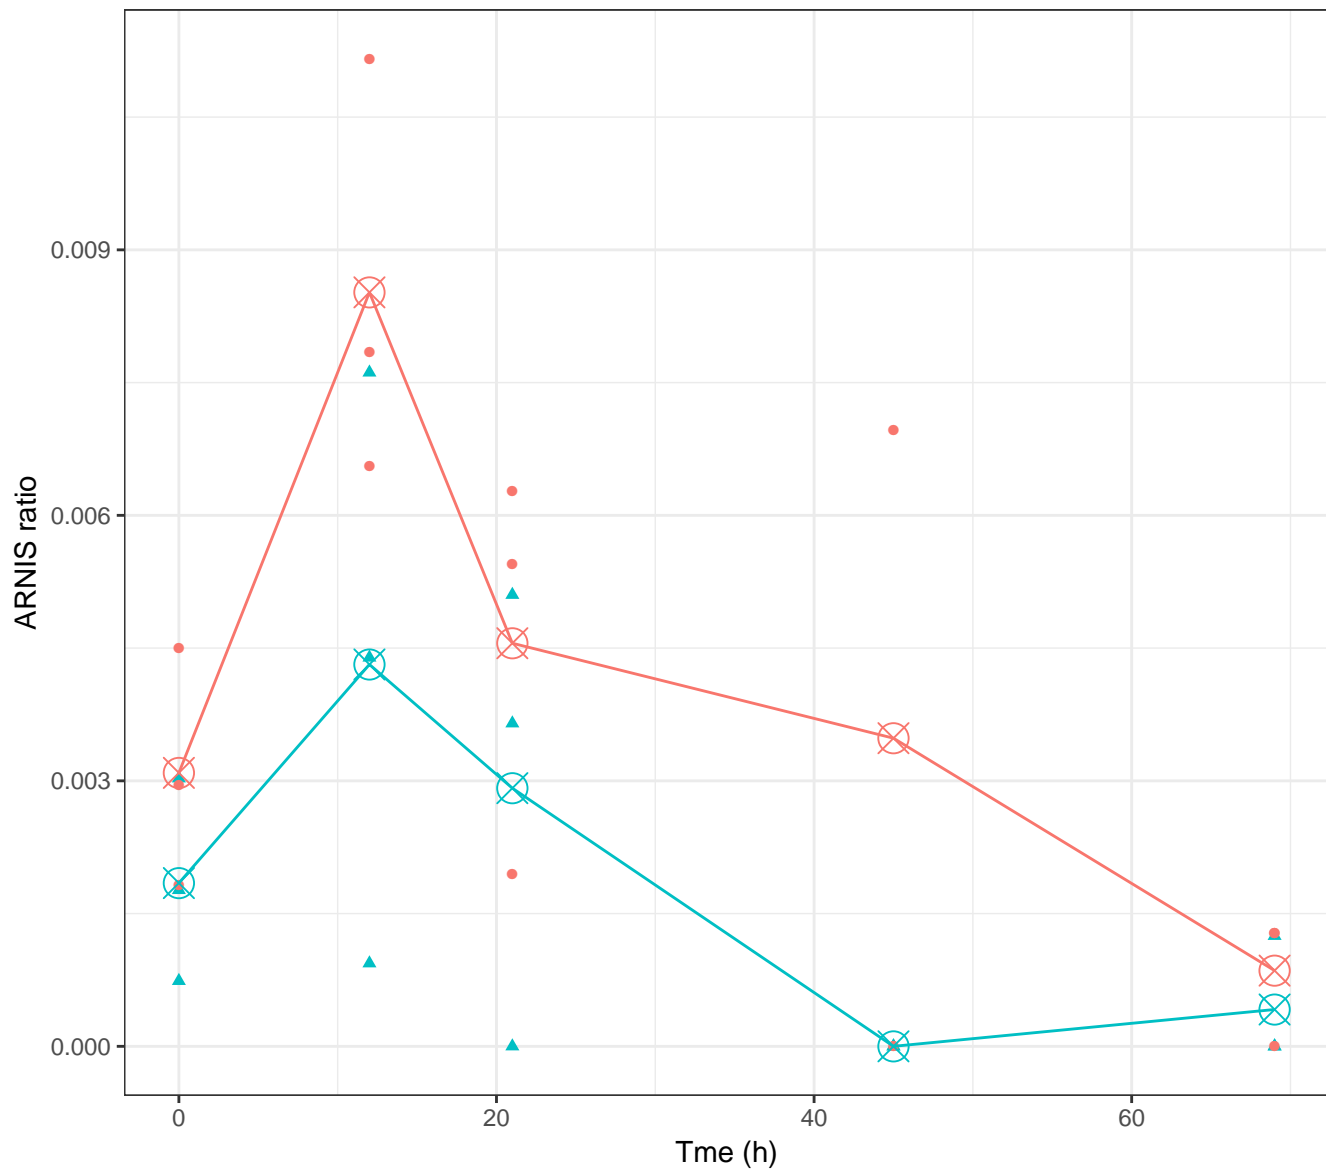



# OTU.848\_Bacteroidetes\_Cytophagaceae

Treatment ⊗ Control ⊗ Filtered-1micron

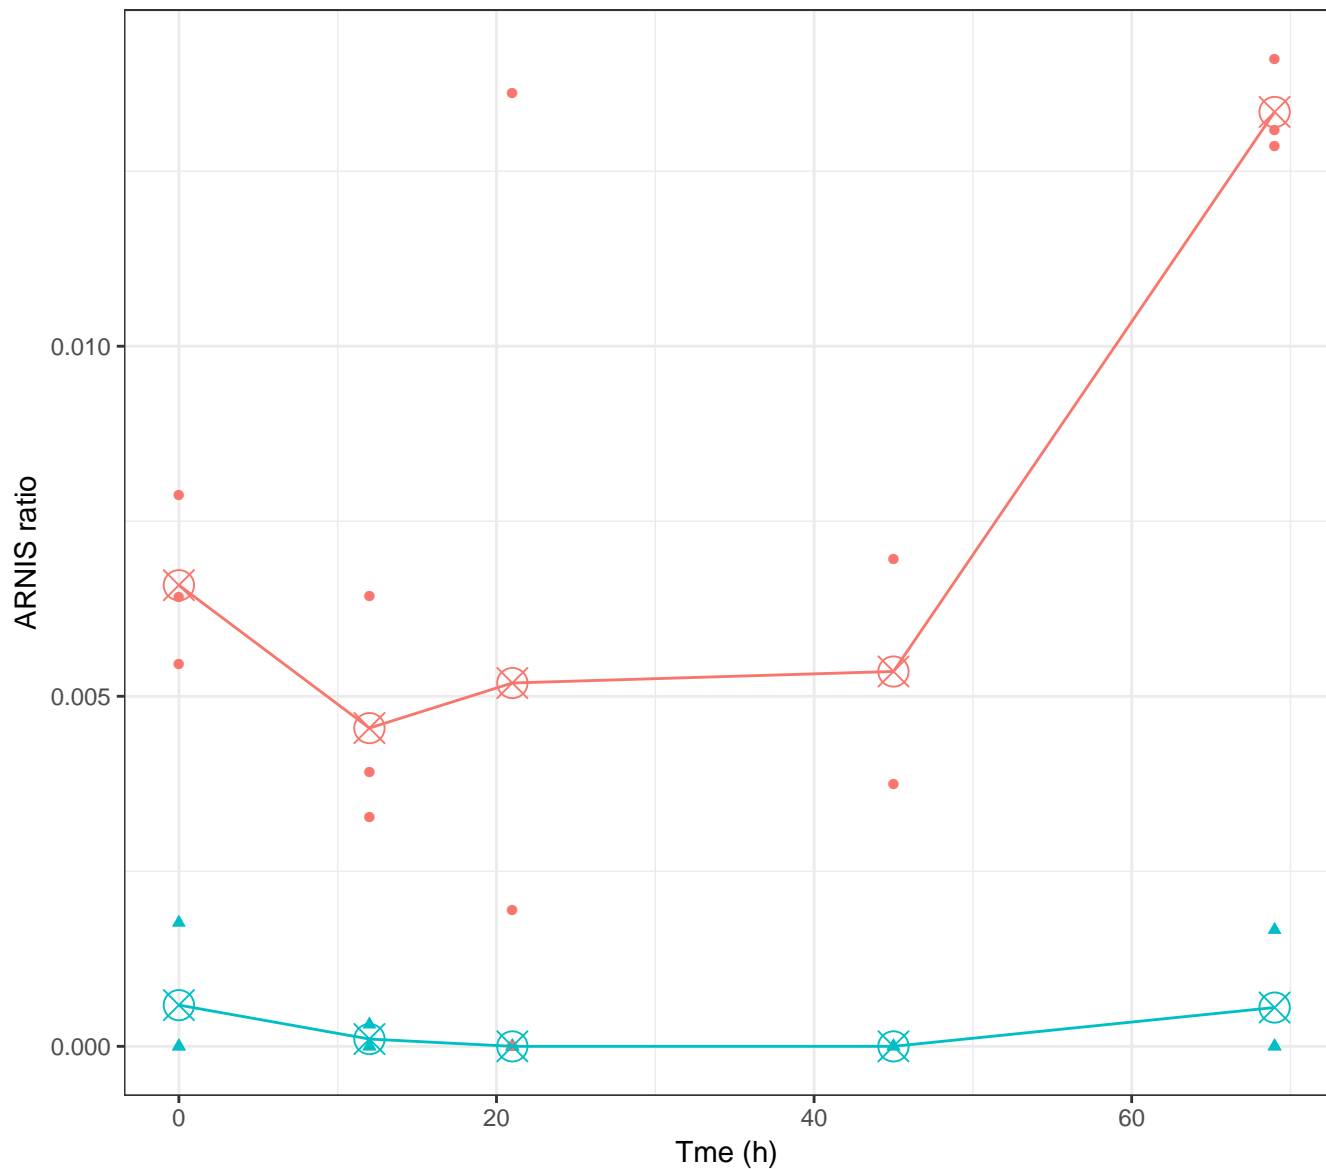

# OTU.739\_Deltaproteobacteria\_Peridibacter

Treatment ⊗ Control ⊗ Filtered-1micron

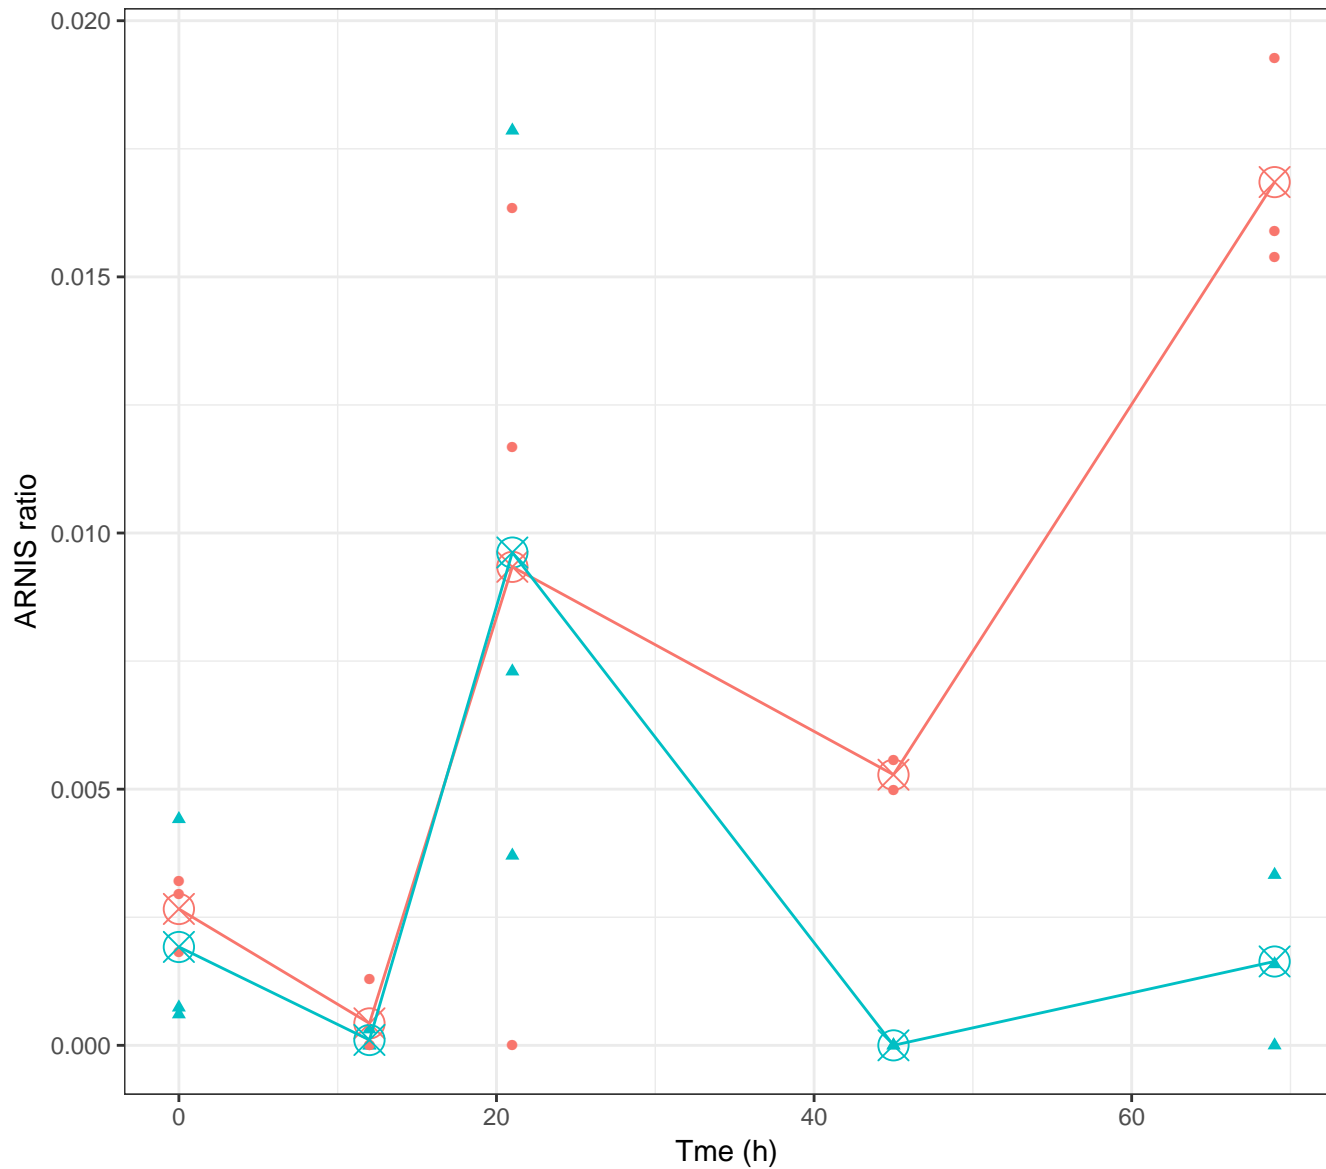

# OTU.539\_Actinobacteria.clade\_acl.B2.4

Treatment ⊗ Control ⊗ Filtered-1micron

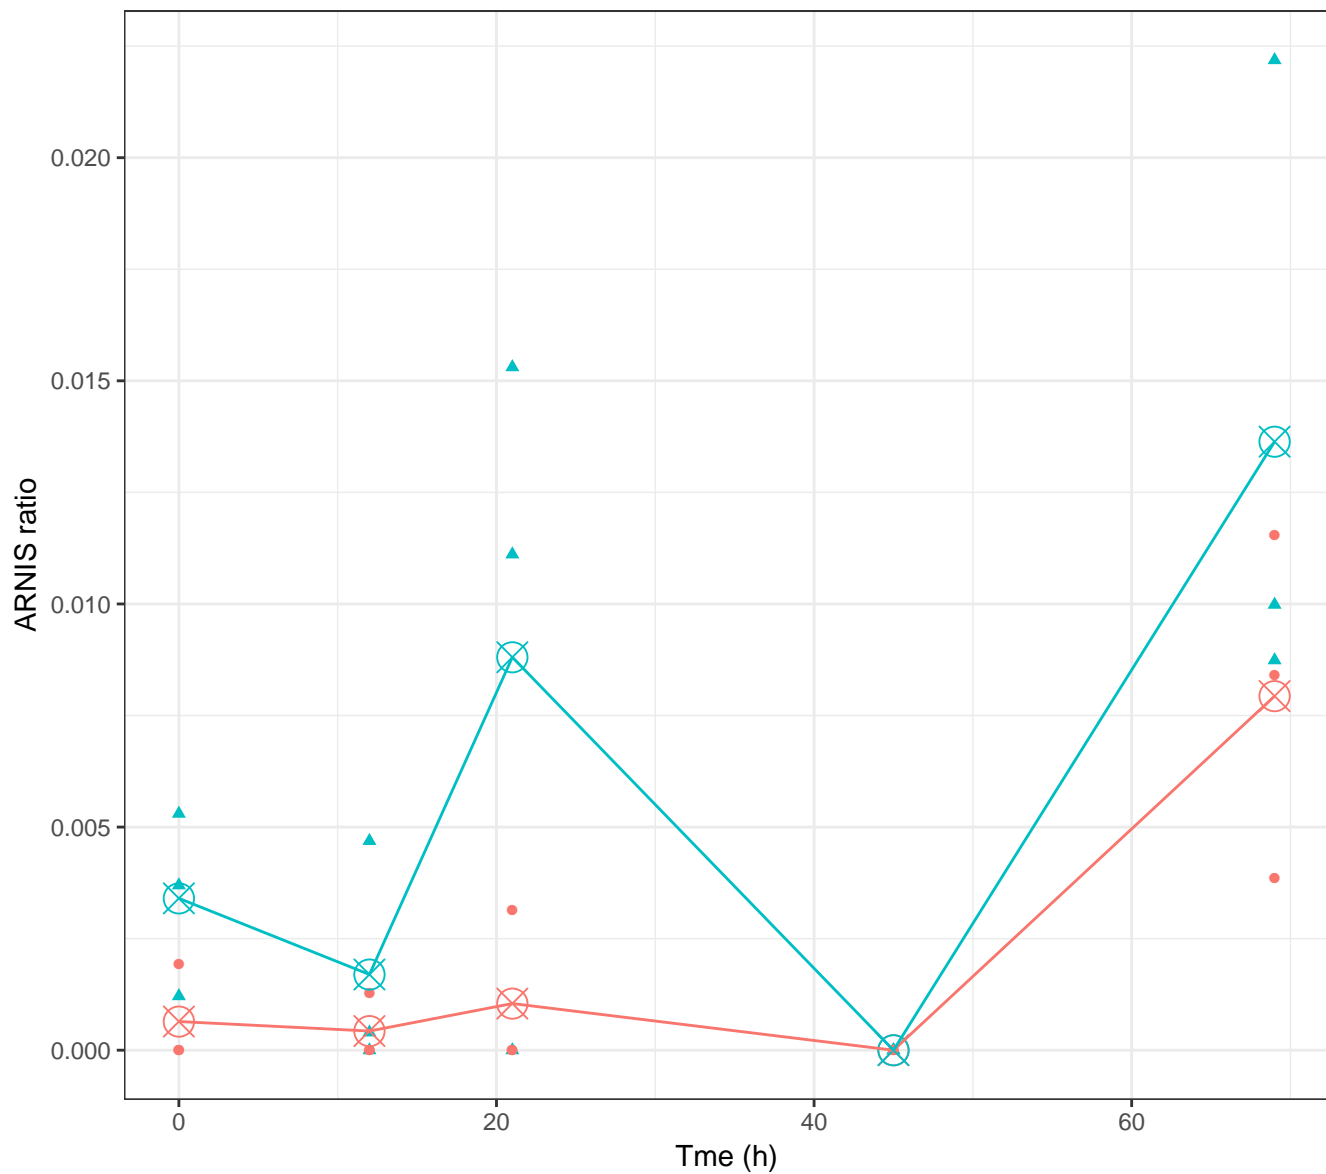

# OTU.730\_Bacteroidetes\_Chitinophagaceae

Treatment ⊗ Control ⊗ Filtered-1micron

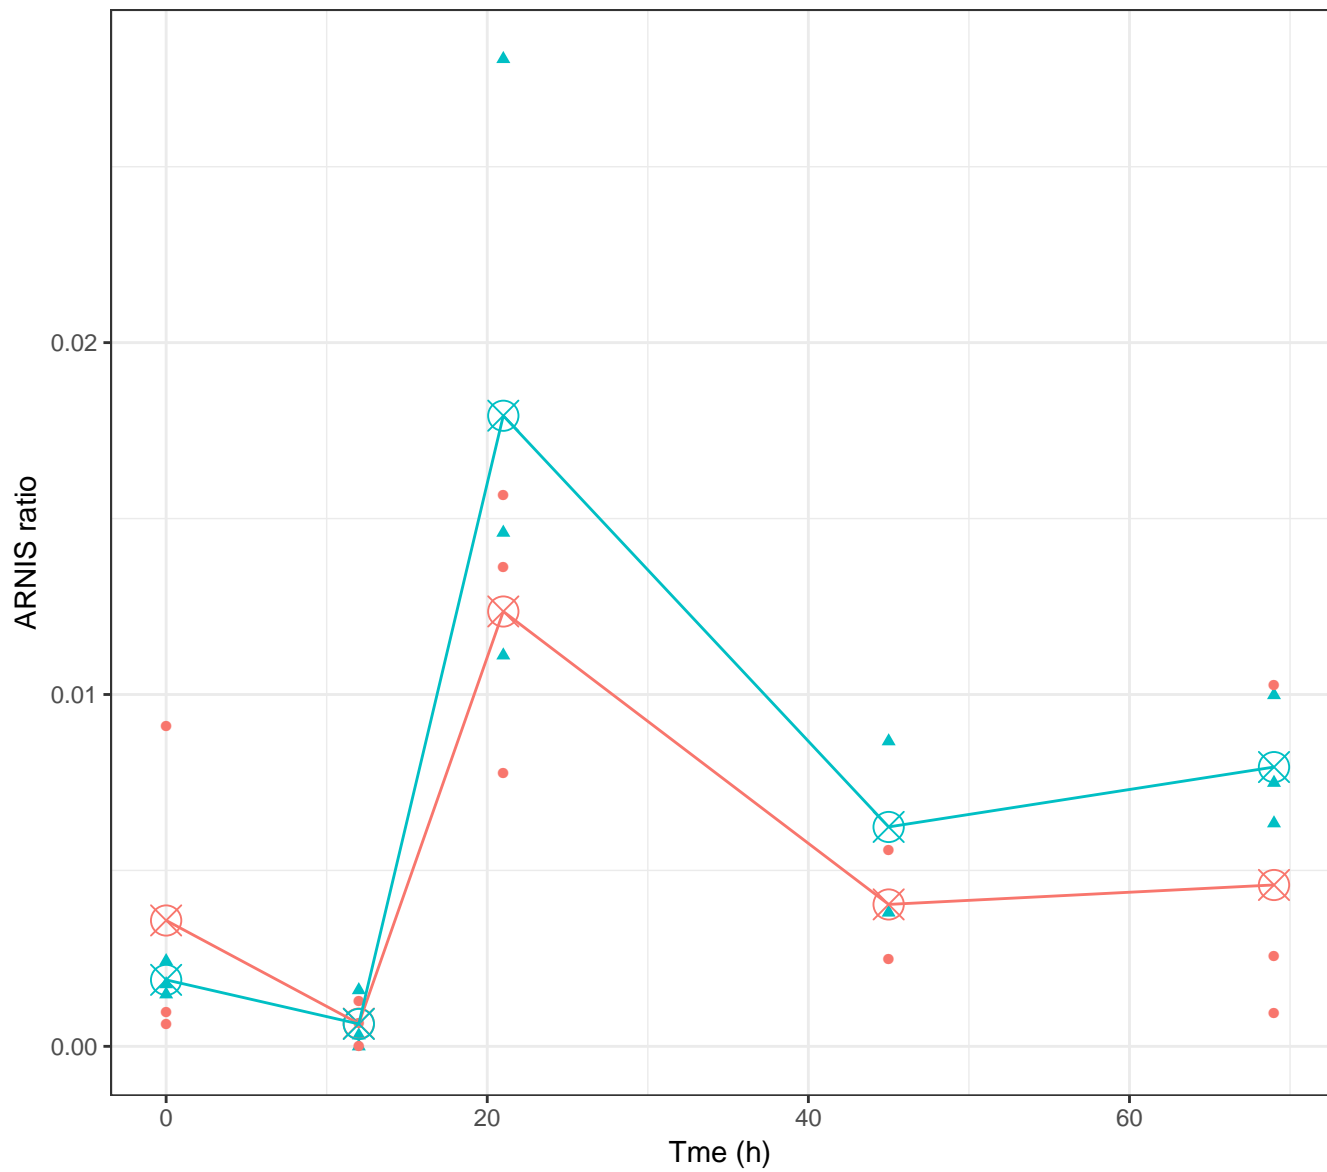

## OTU.816\_Gammaproteobacteria\_Rheinheimera

Treatment  Control  Filtered-1micron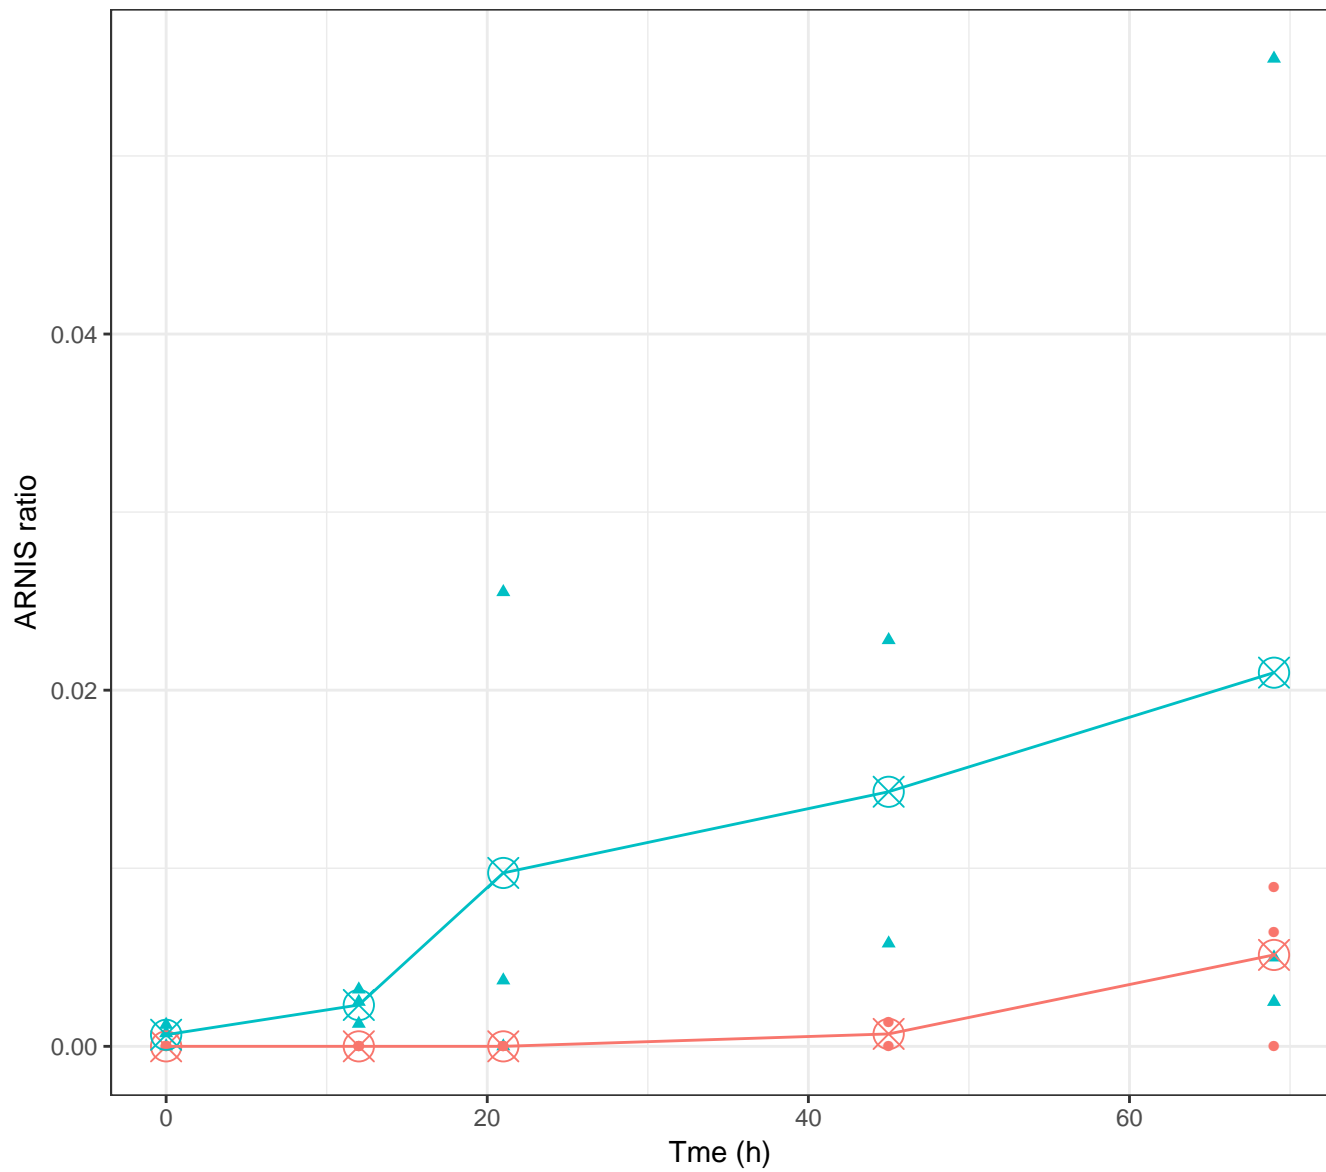

# OTU.5185\_Verrucomicrobia\_Opitutae

Treatment ⊗ Control ⊗ Filtered-1micron

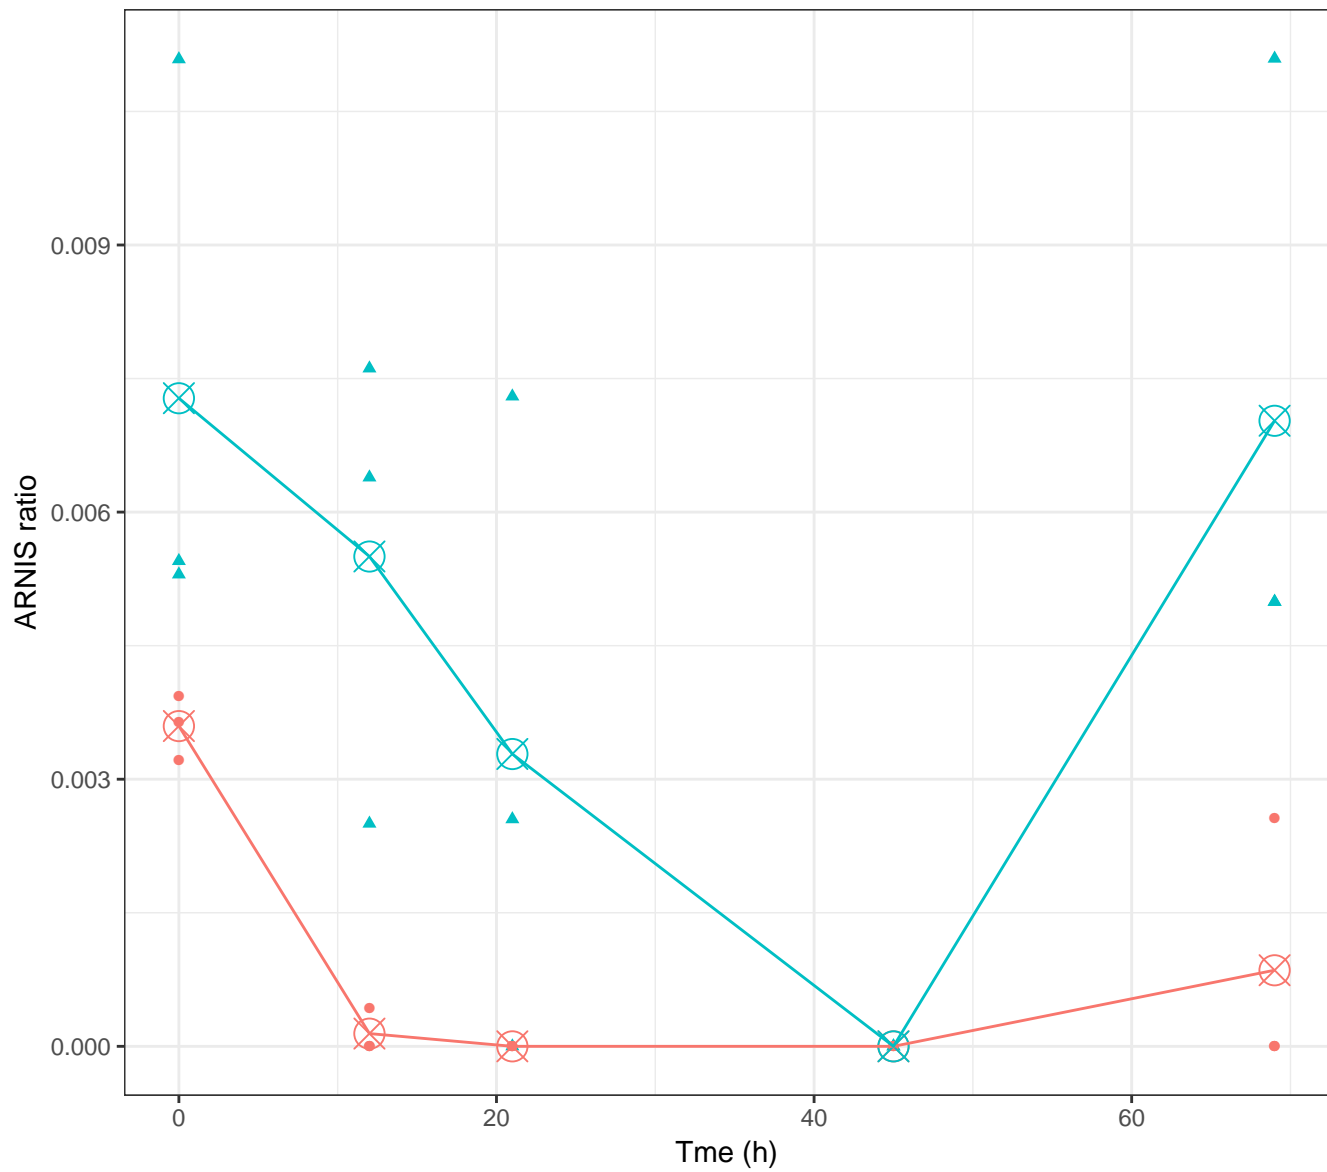

# OTU.289\_Actinobacteria\_Microbacteriaceae

Treatment  Control  Filtered-1micron

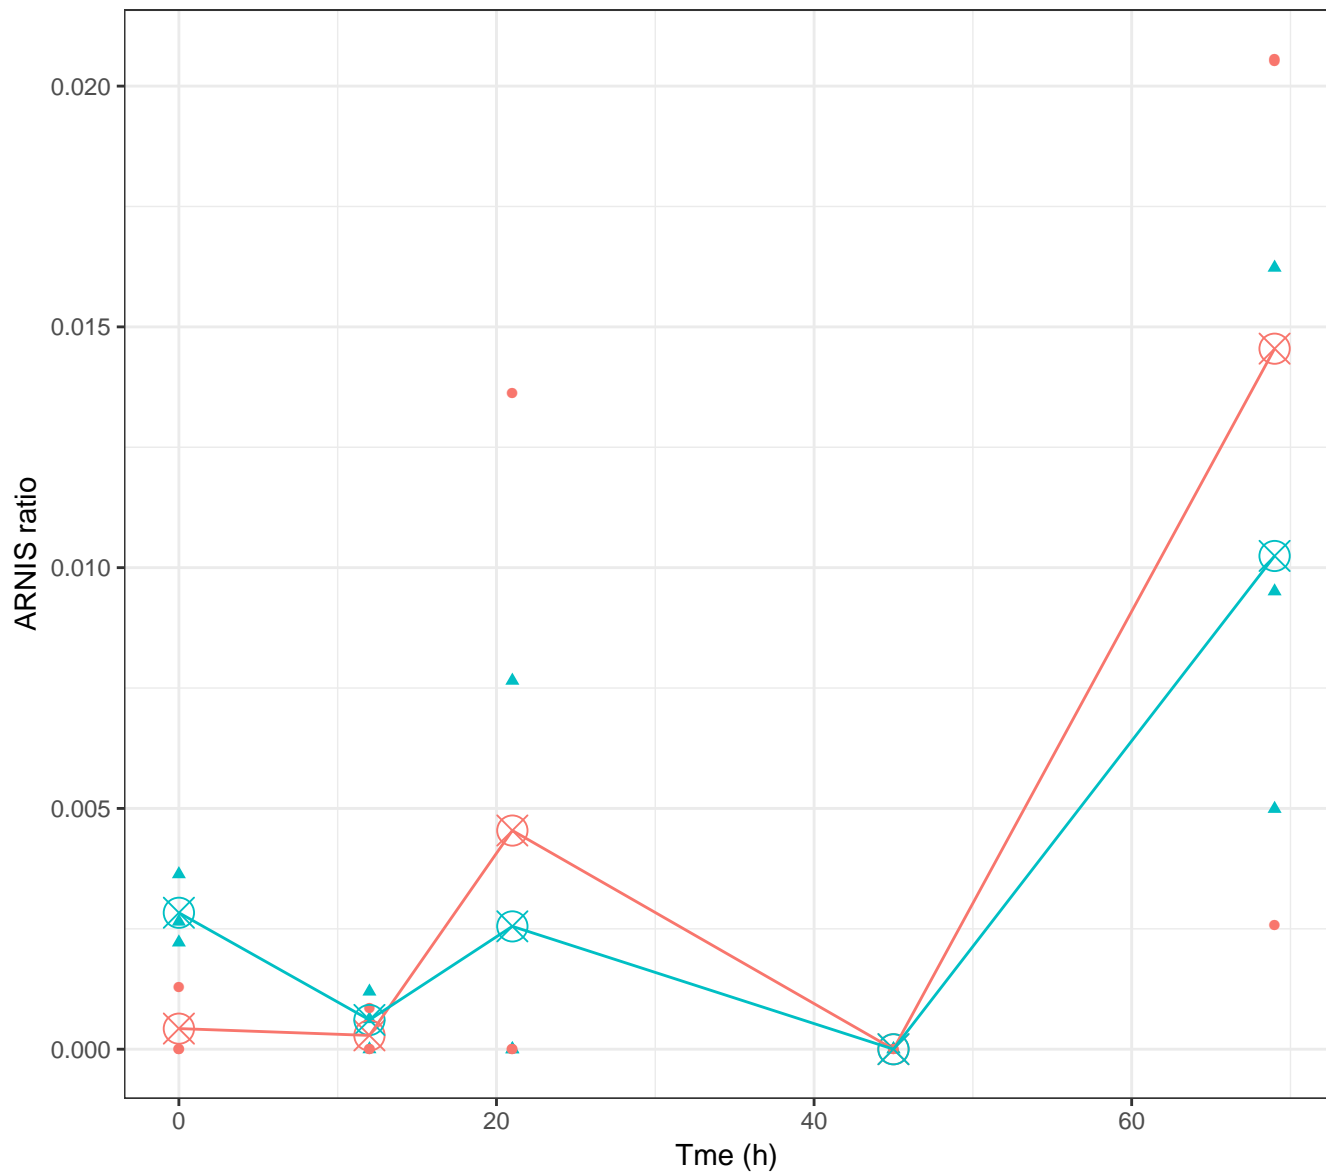

# OTU.309\_Actinobacteria\_Candidatus\_Limnoluna

Treatment ⊗ Control ⊗ Filtered-1micron

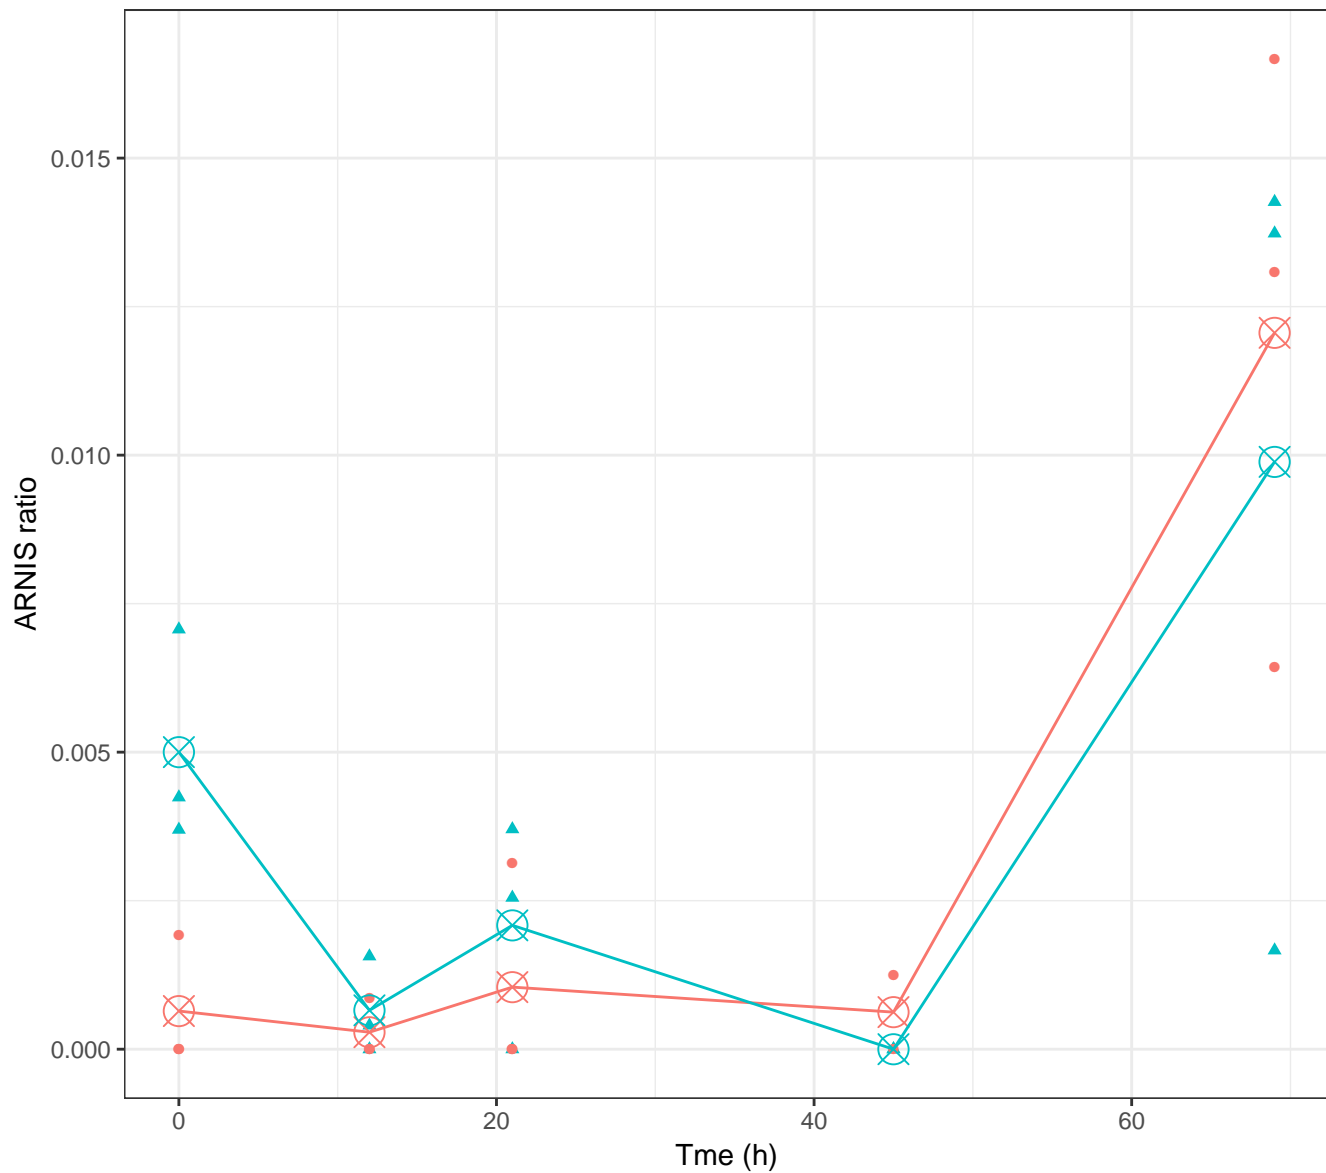



# OTU.749\_Alphaproteobacteria\_Candidatus\_Hepaticola

Treatment ⊗ Control ⊗ Filtered-1micron

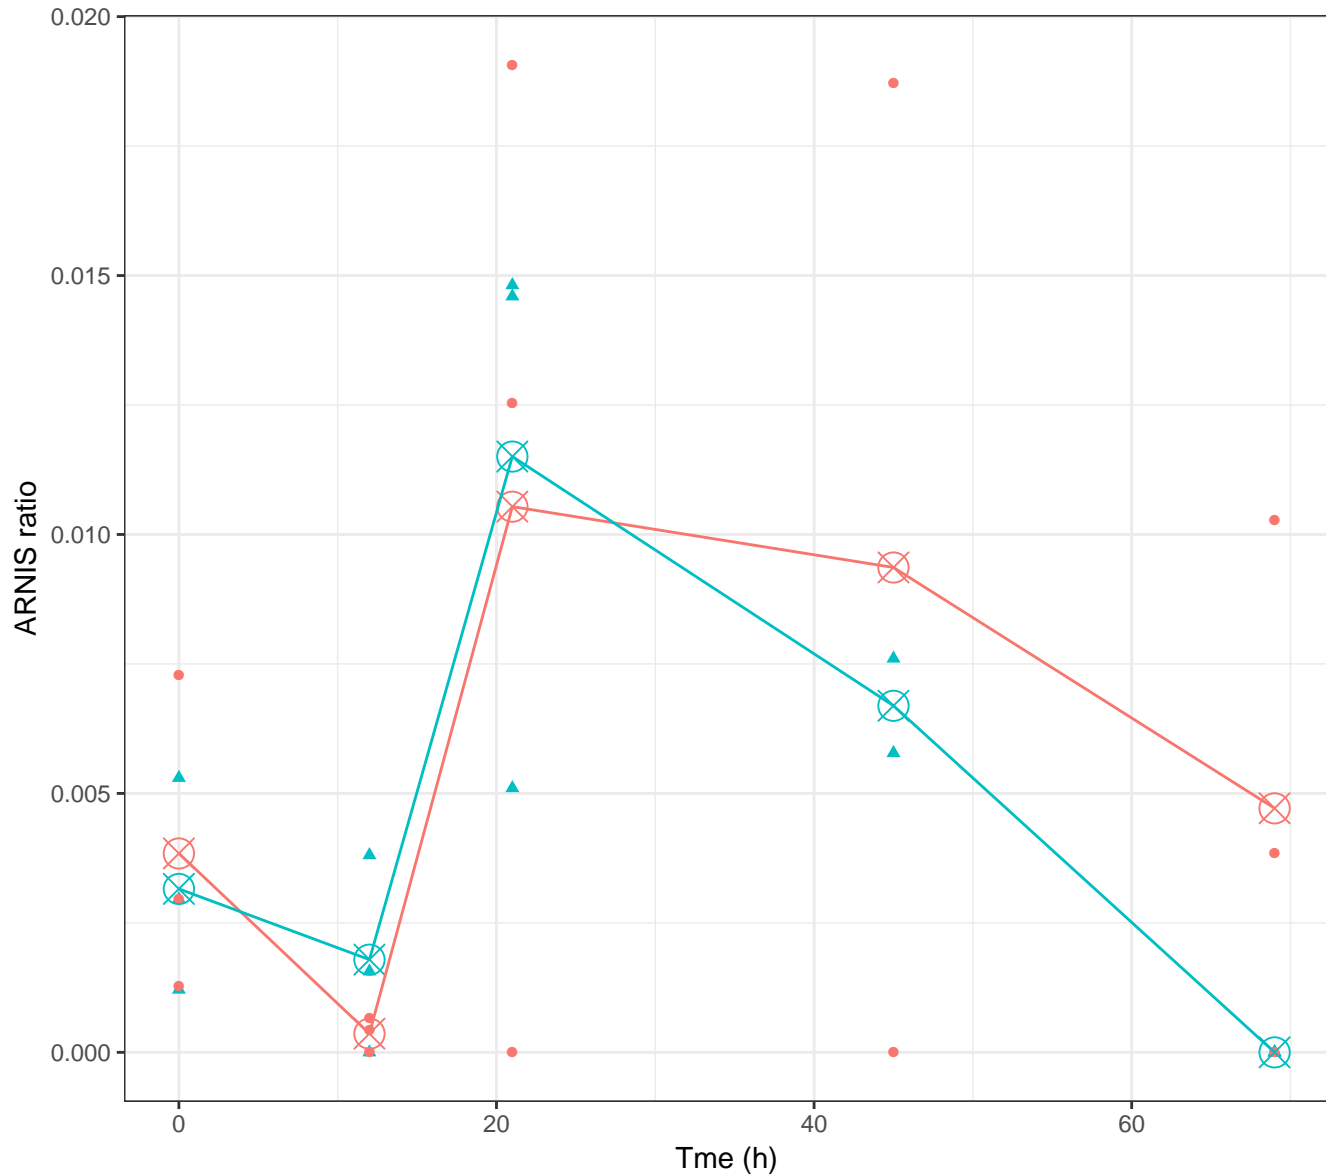

# OTU.765\_Chlorobi\_OPB56

Treatment ⊗ Control ⊗ Filtered-1micron

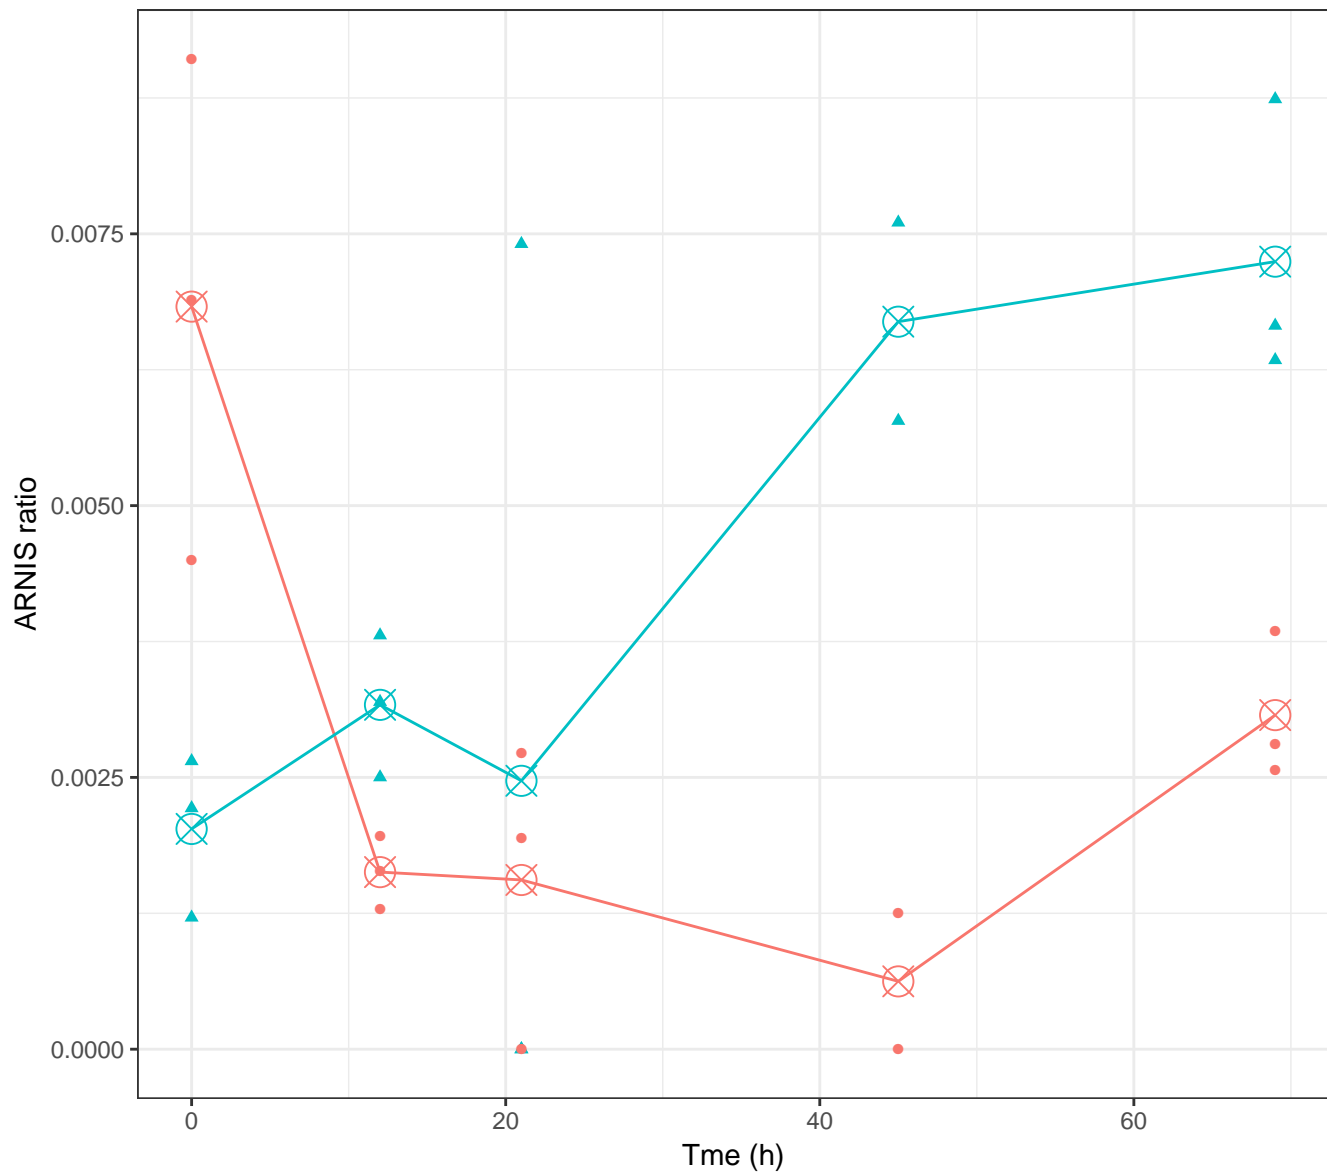

# OTU.71\_Proteobacteria\_Rhodoblastus

Treatment Control Filtered-1micron

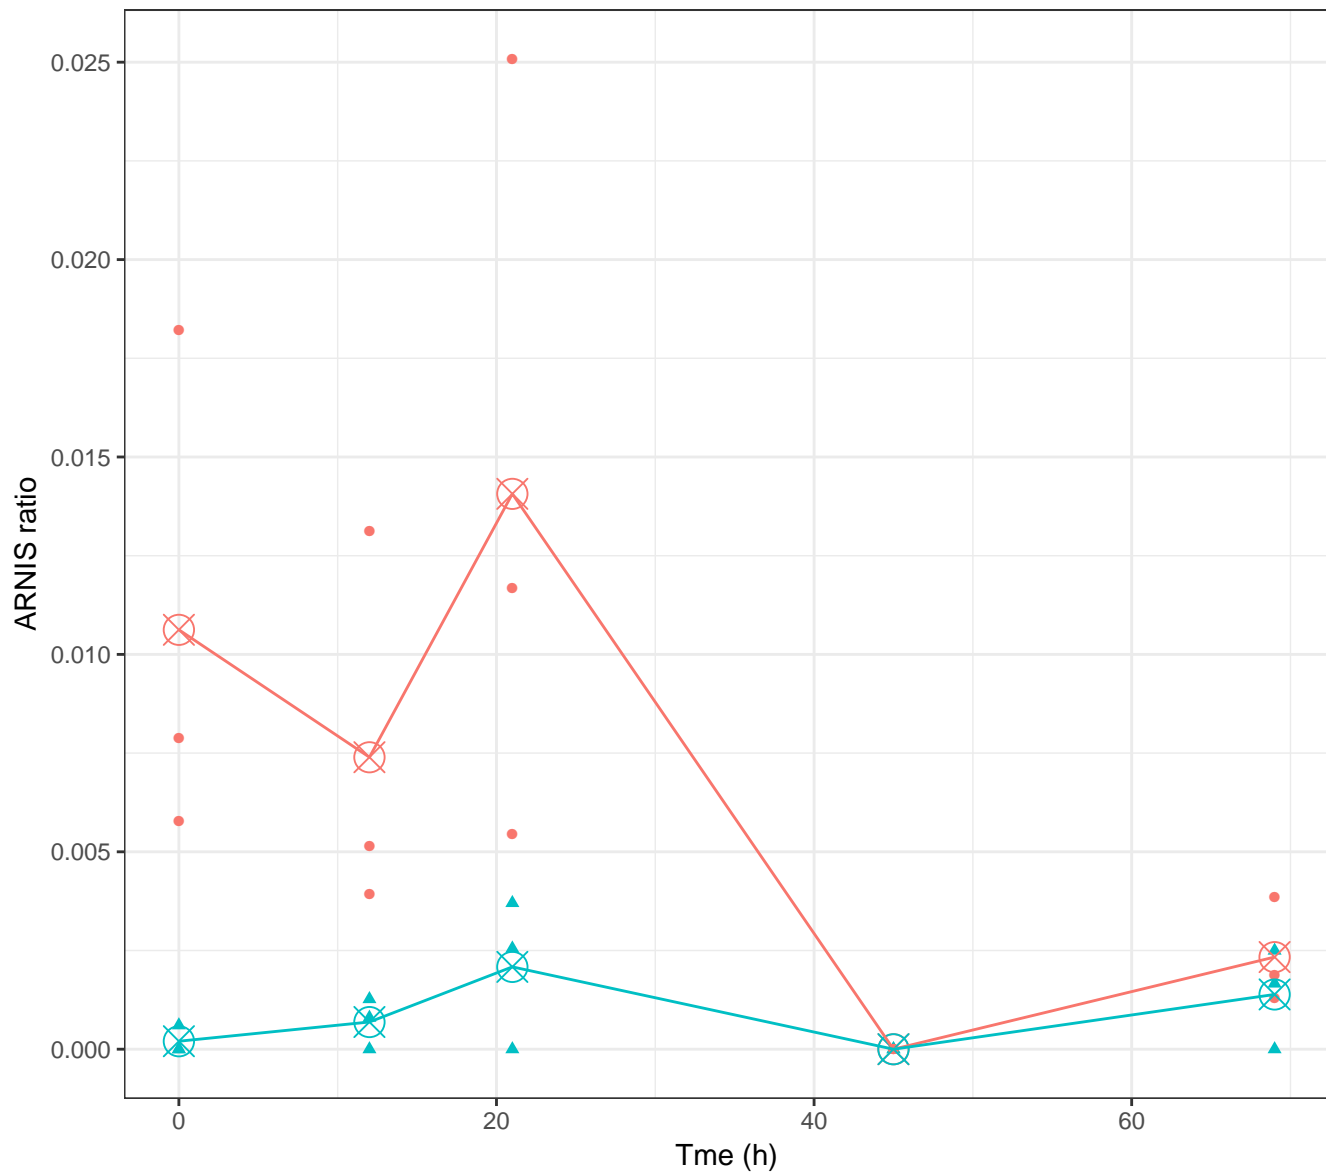

# OTU.2215\_Actinobacteria\_Microbacteriaceae

Treatment ⊗ Control ⊗ Filtered-1micron

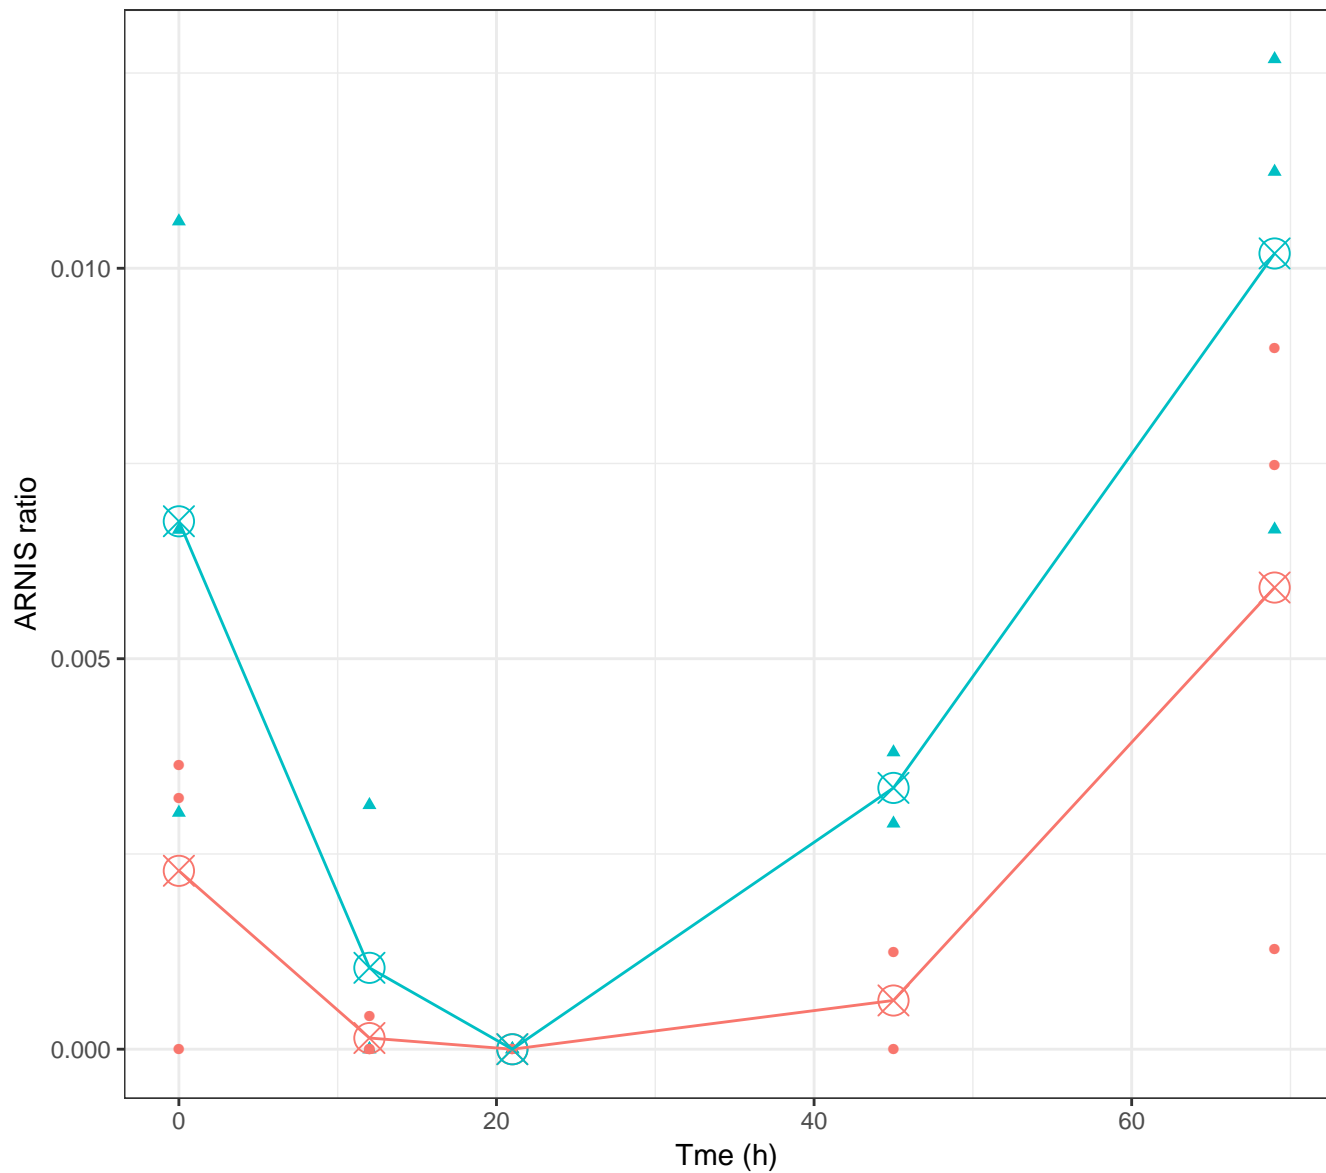

## OTU.187\_Verrucomicrobia\_Chthoniobacterales

Treatment  Control  Filtered-1micron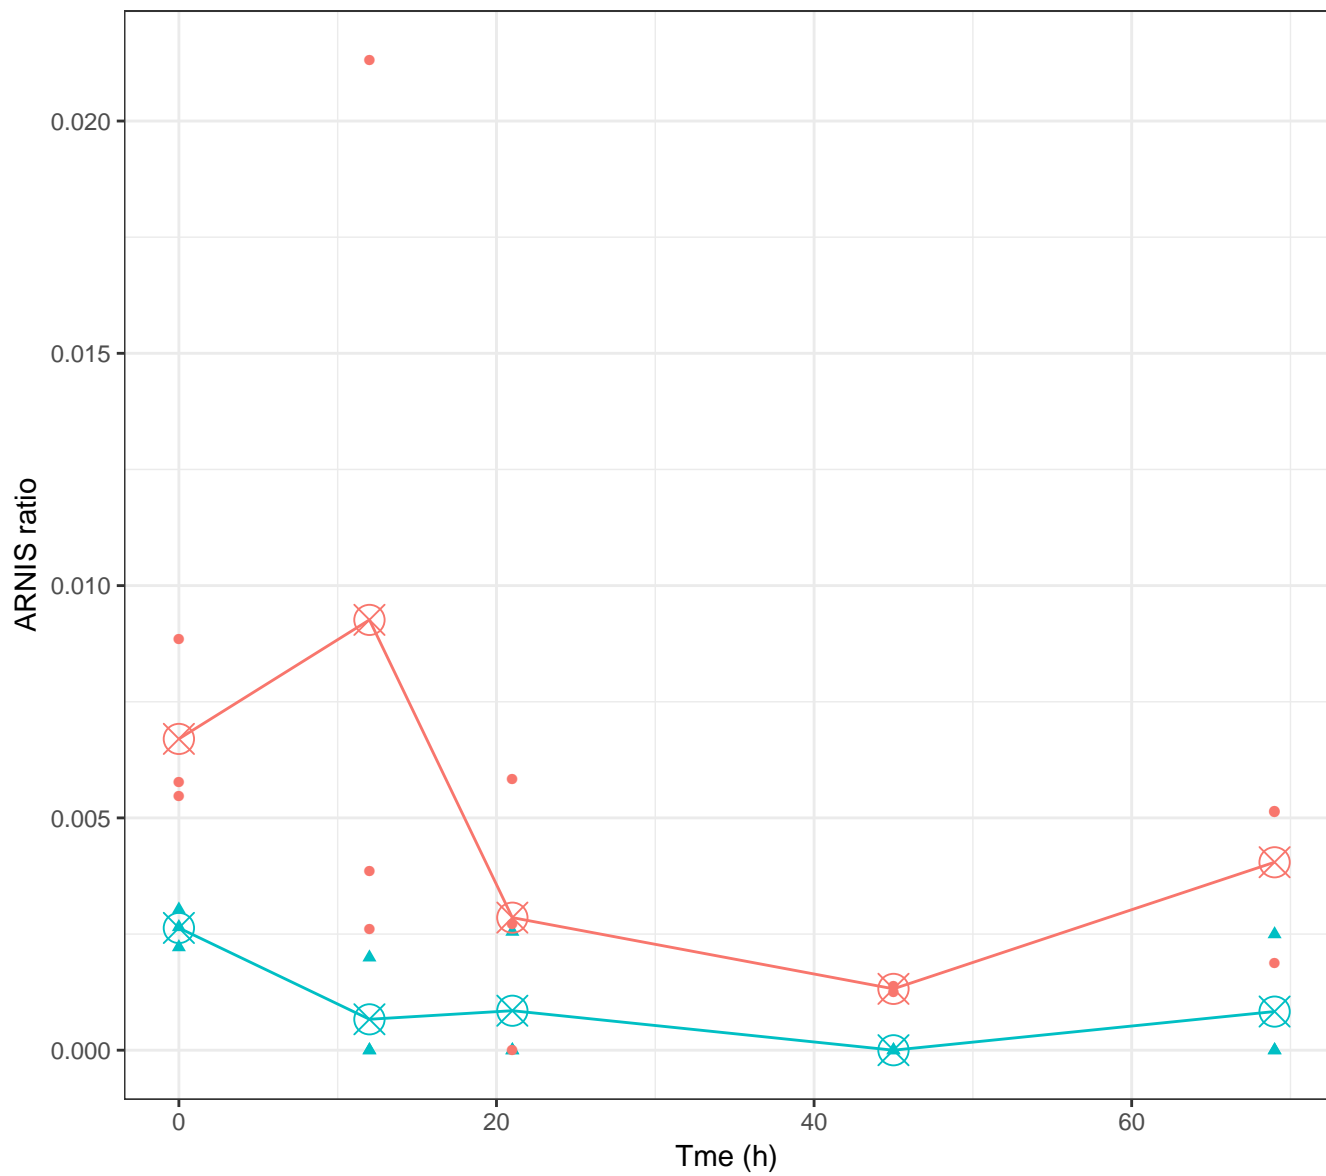

# OTU.767\_Bacteroidetes\_NS11.12\_marine\_group

Treatment ⊗ Control ⊗ Filtered-1micron

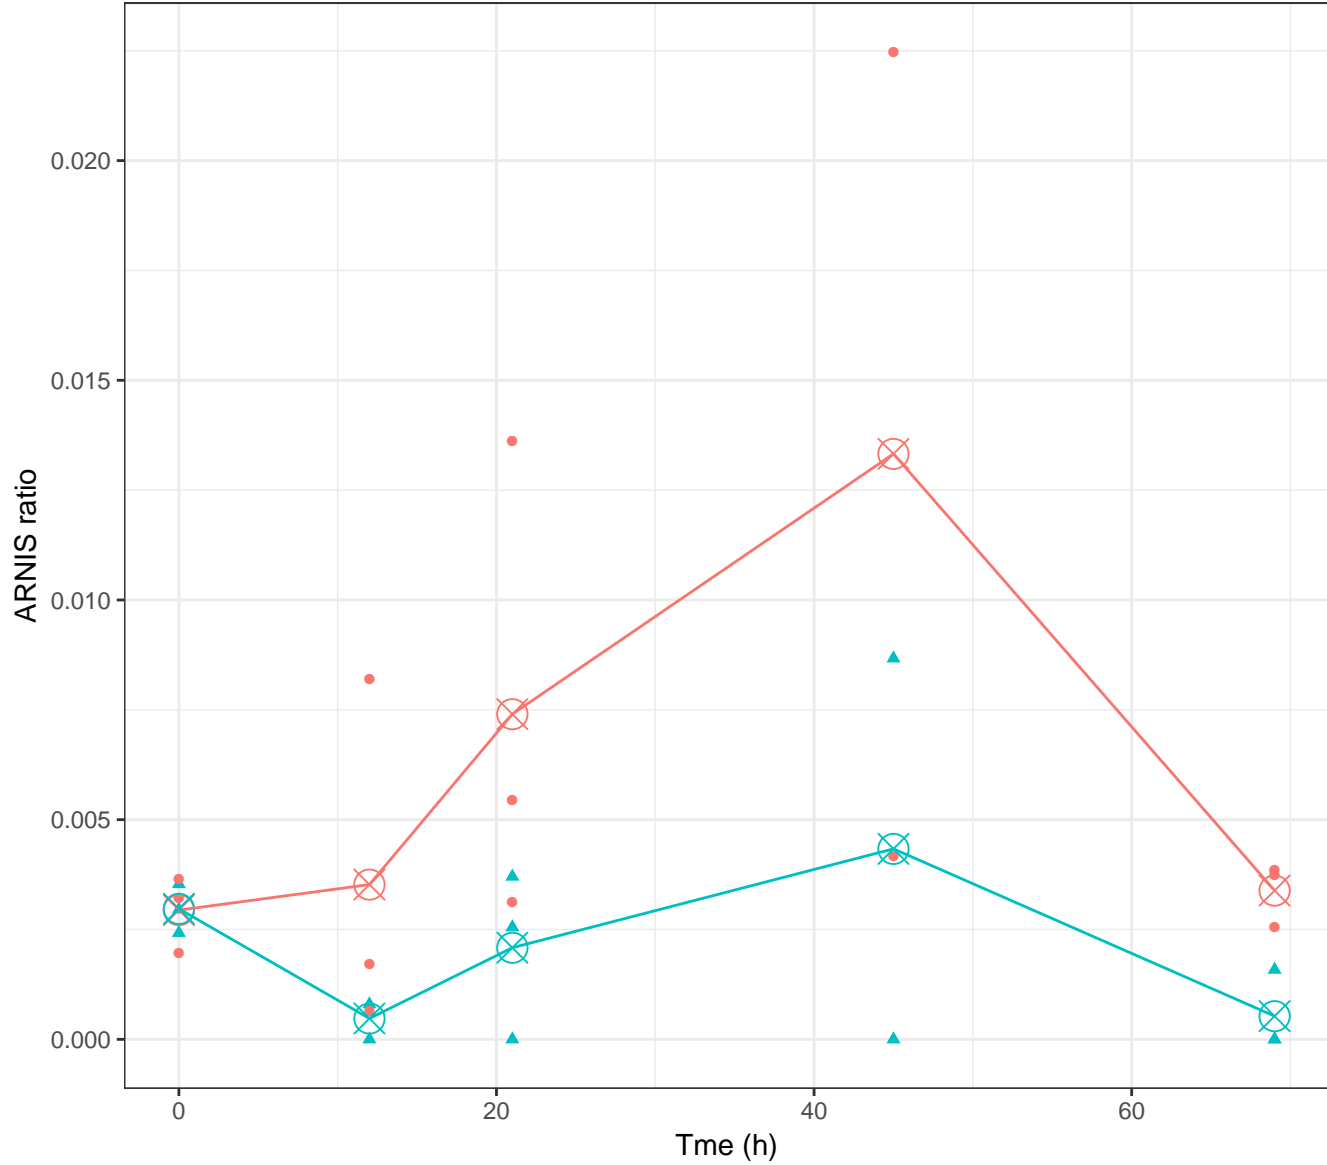

# OTU.609\_Actinobacteria\_Corynebacteriaceae

Treatment Control Filtered-1micron

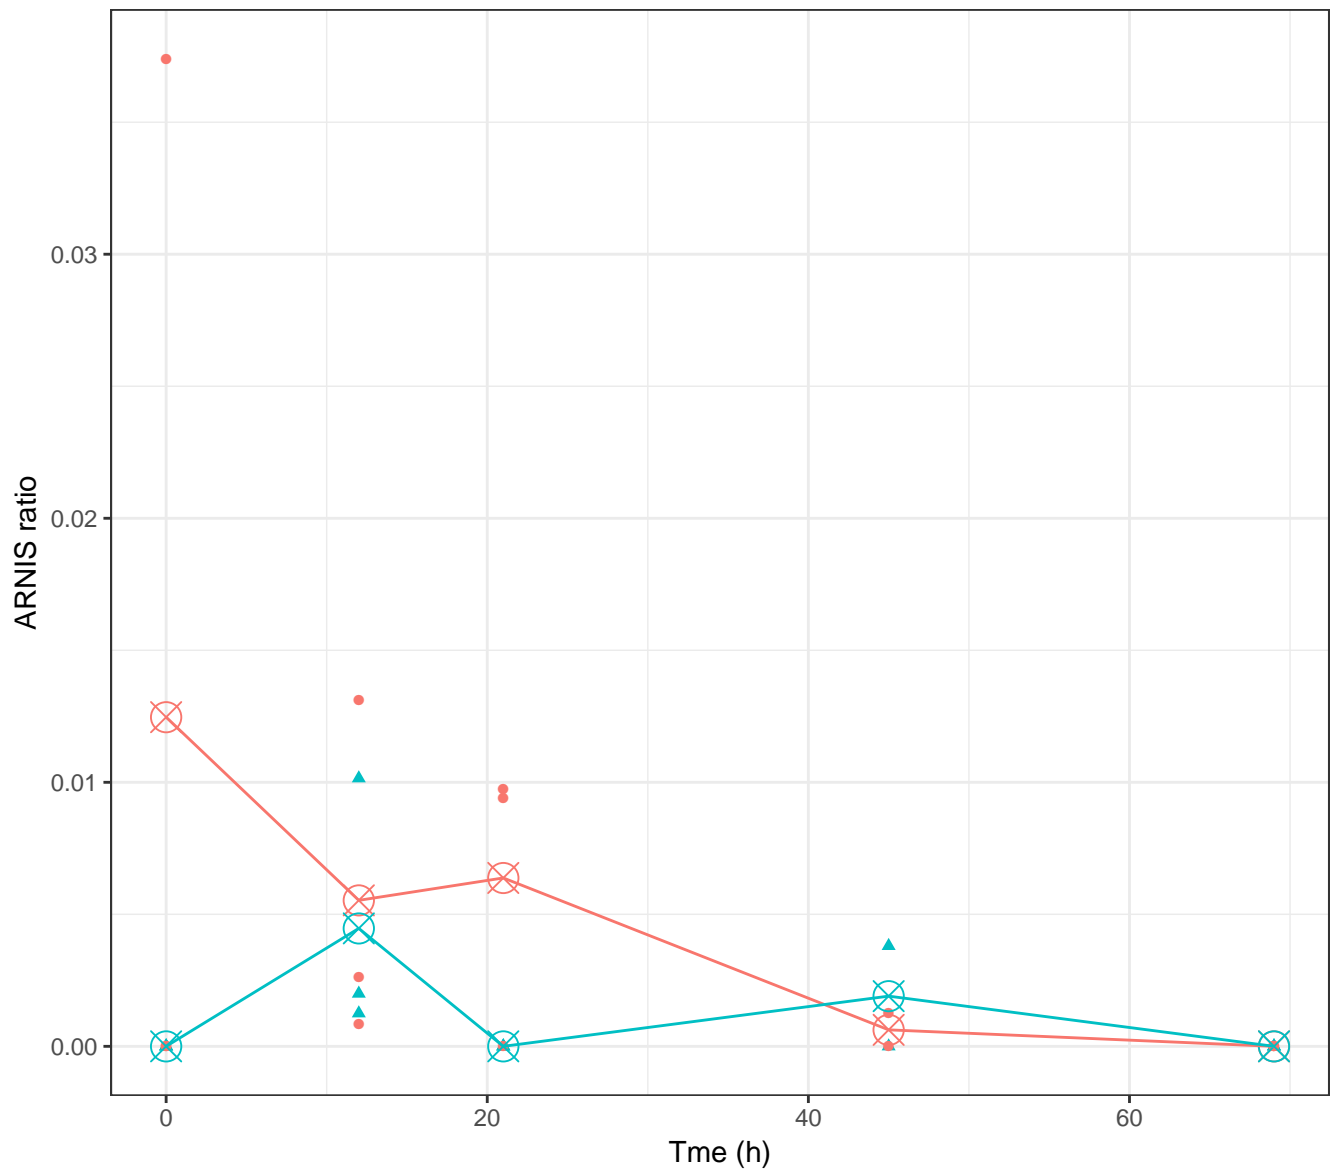

# OTU.425\_Bacteroidetes\_Chitinophagaceae

Treatment Control Filtered-1micron

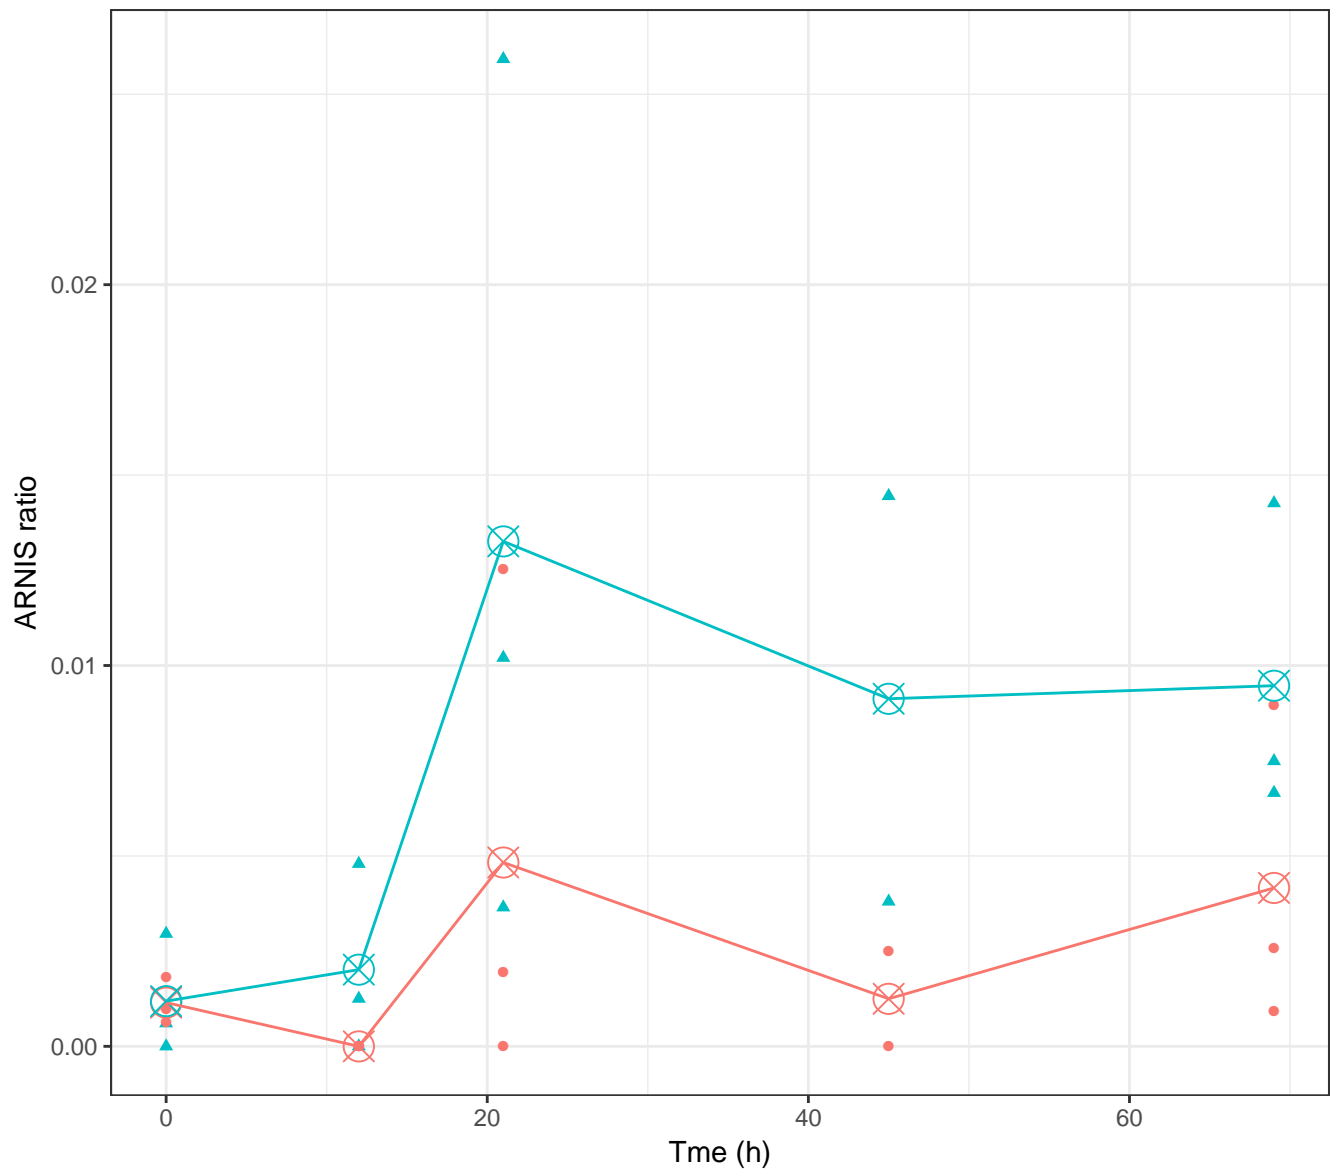



# OTU.901\_Verrucomicrobia\_OPB35\_soil\_group

Treatment ⊗ Control ⊗ Filtered-1micron

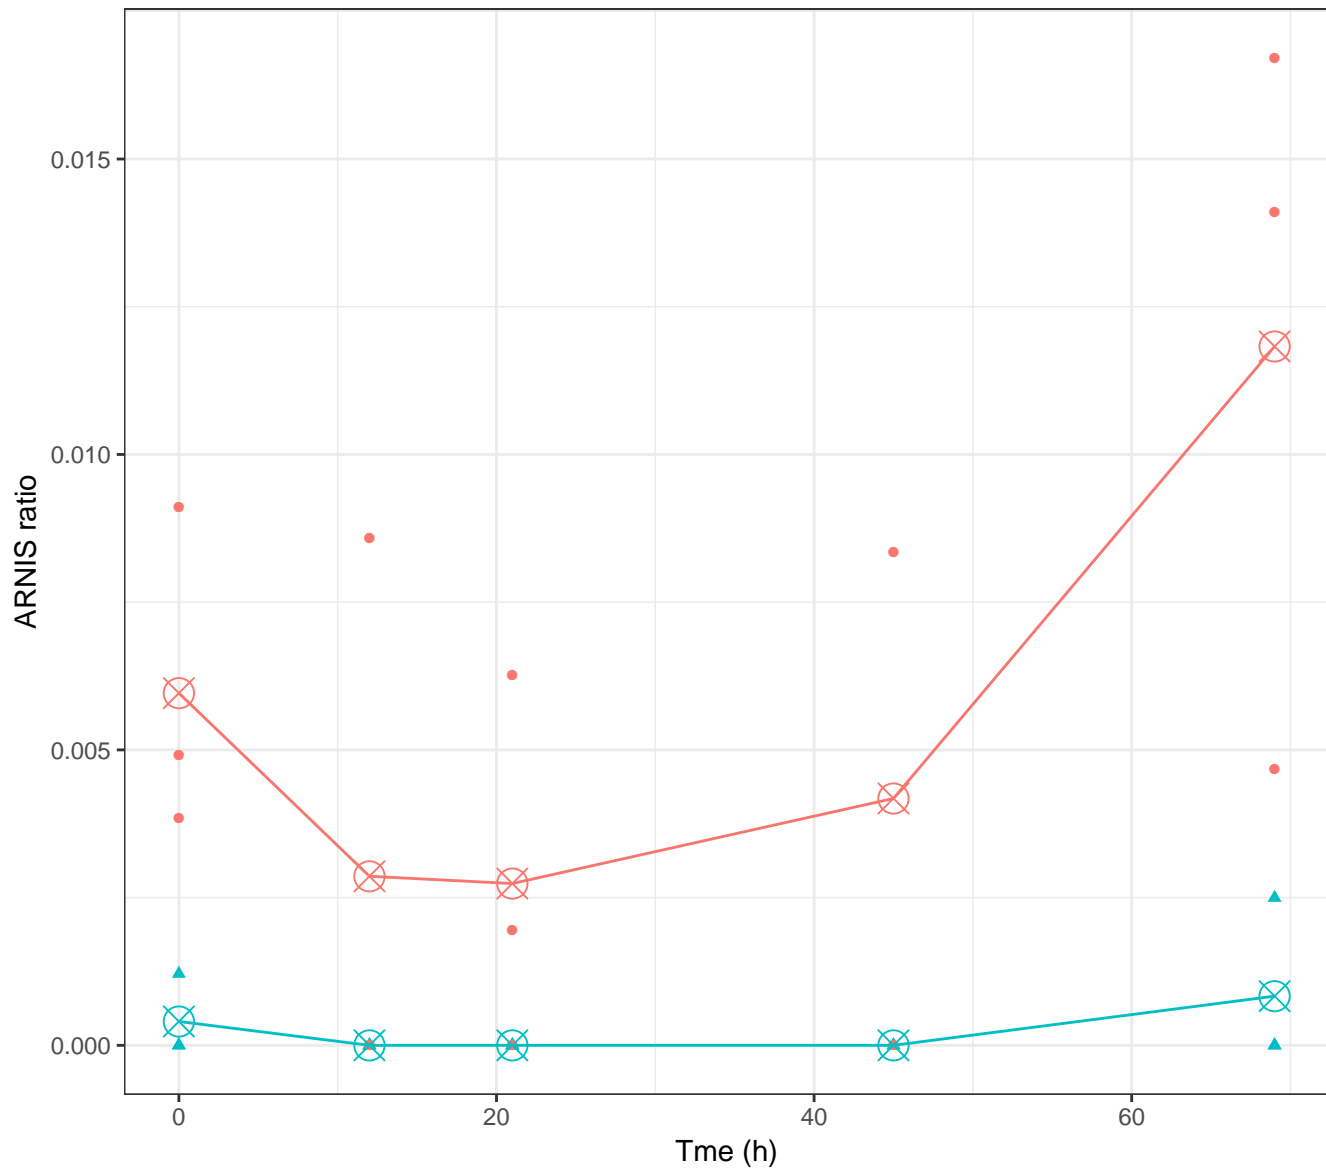

# OTU.918\_Candidate\_division\_SR1

Treatment ⊗ Control ⊗ Filtered-1micron

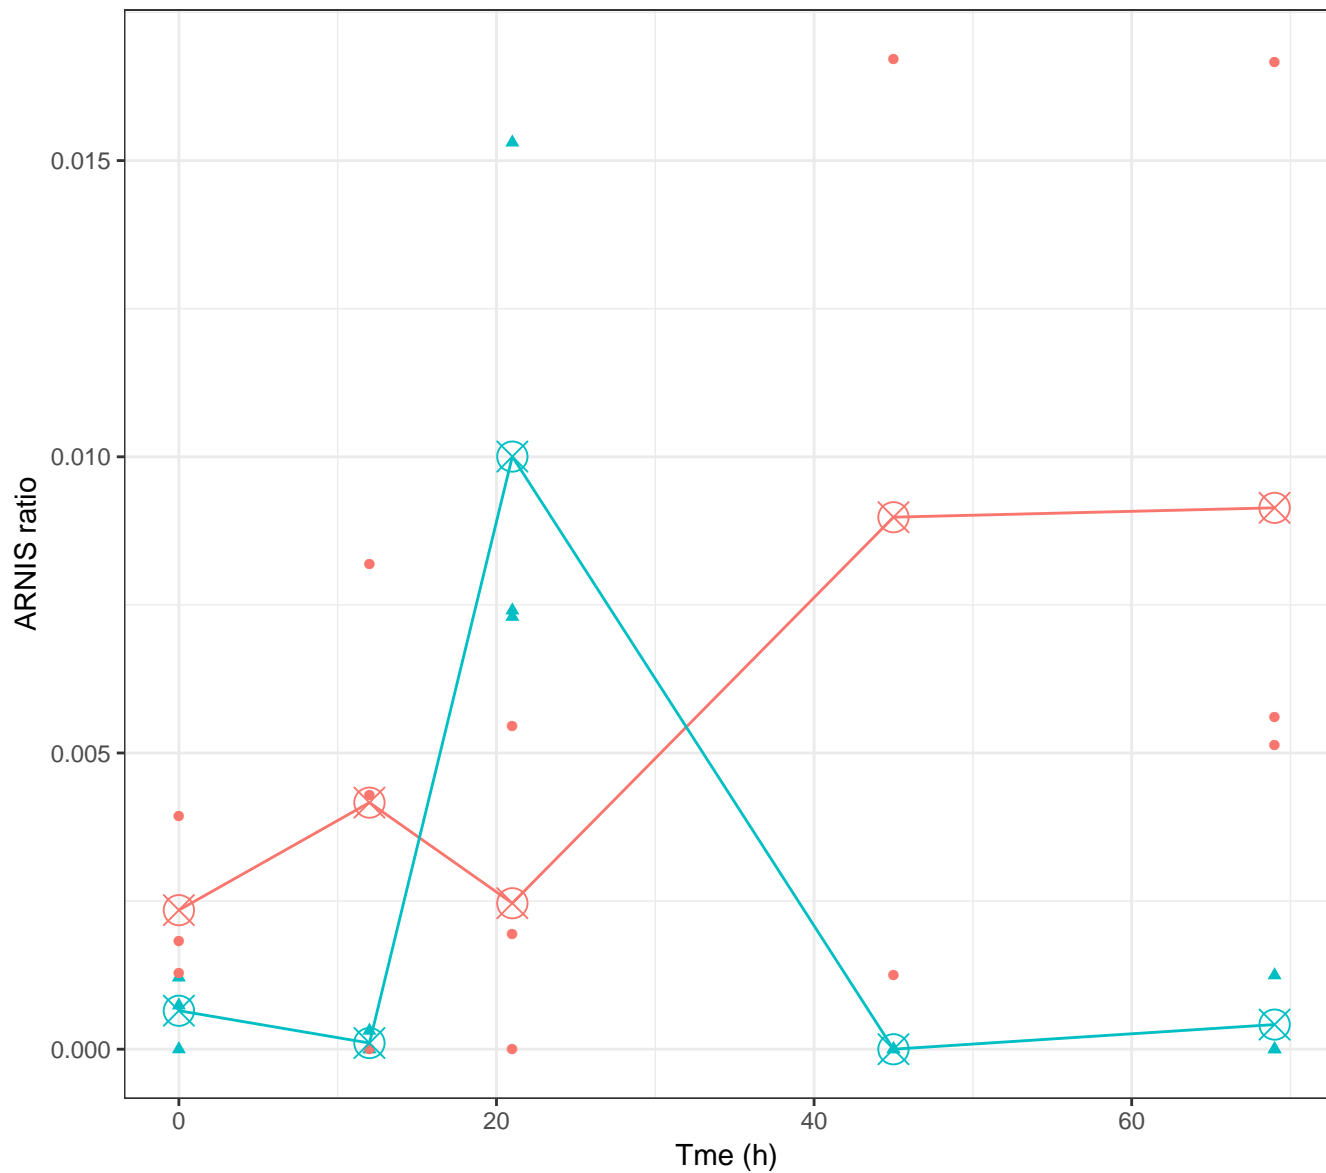

# OTU.1235\_Bacteroidetes\_Leadbetterella

Treatment Control Filtered-1micron

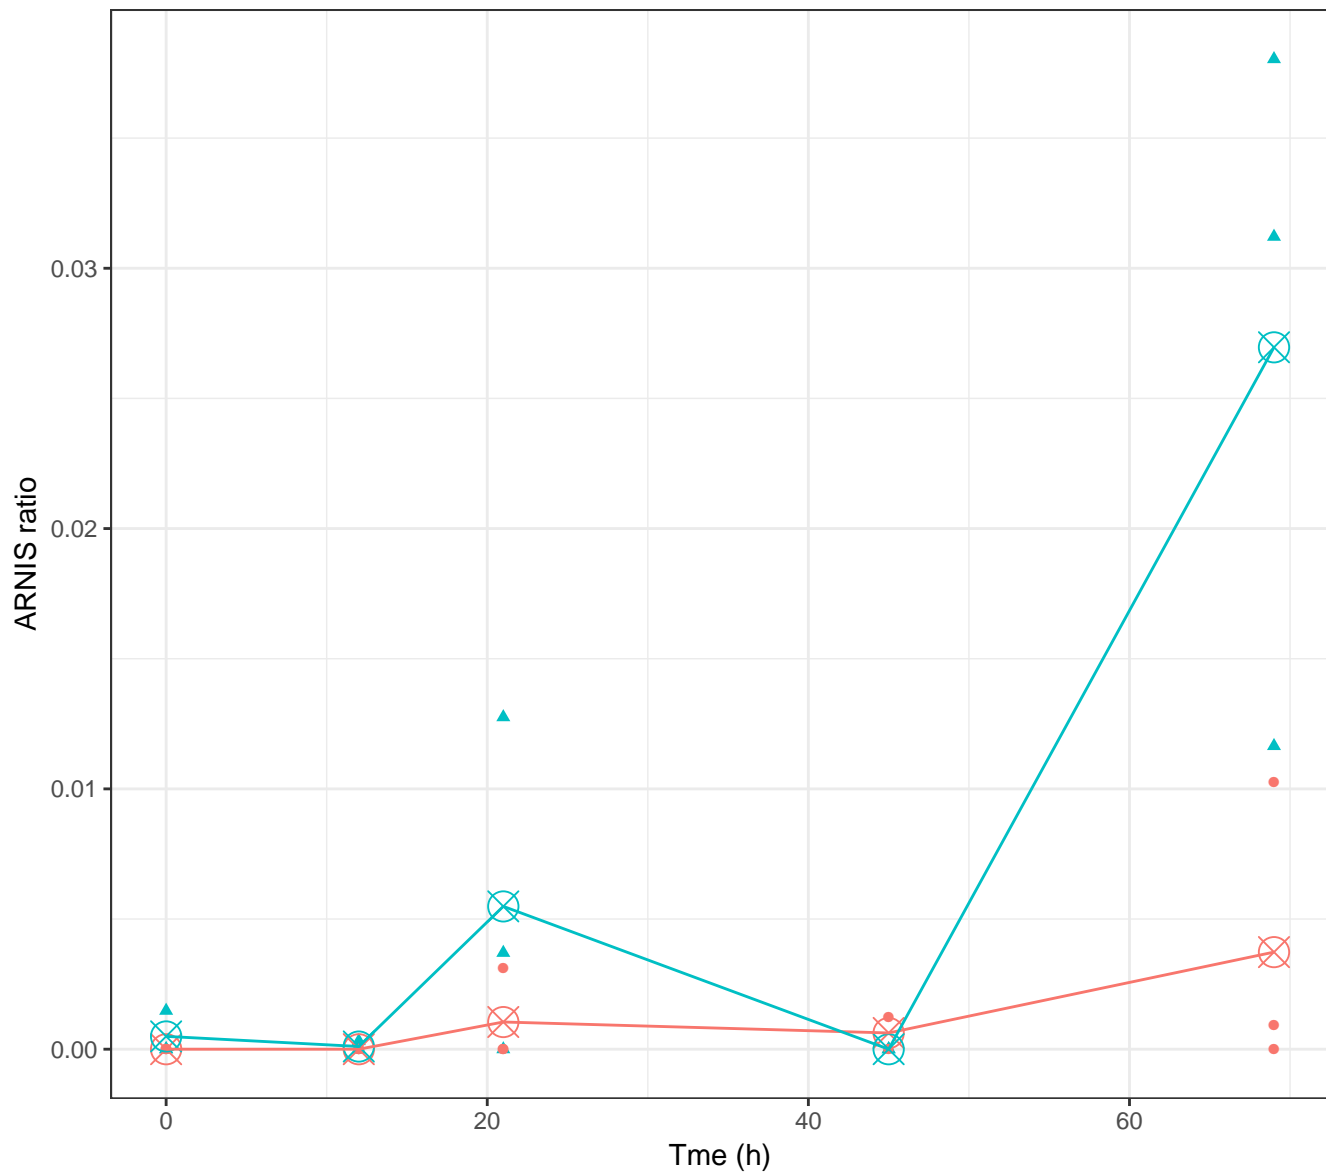

# OTU.6899\_Betaproteobacteria\_Polynucleobacter

Treatment ⊗ Control ⊗ Filtered-1micron

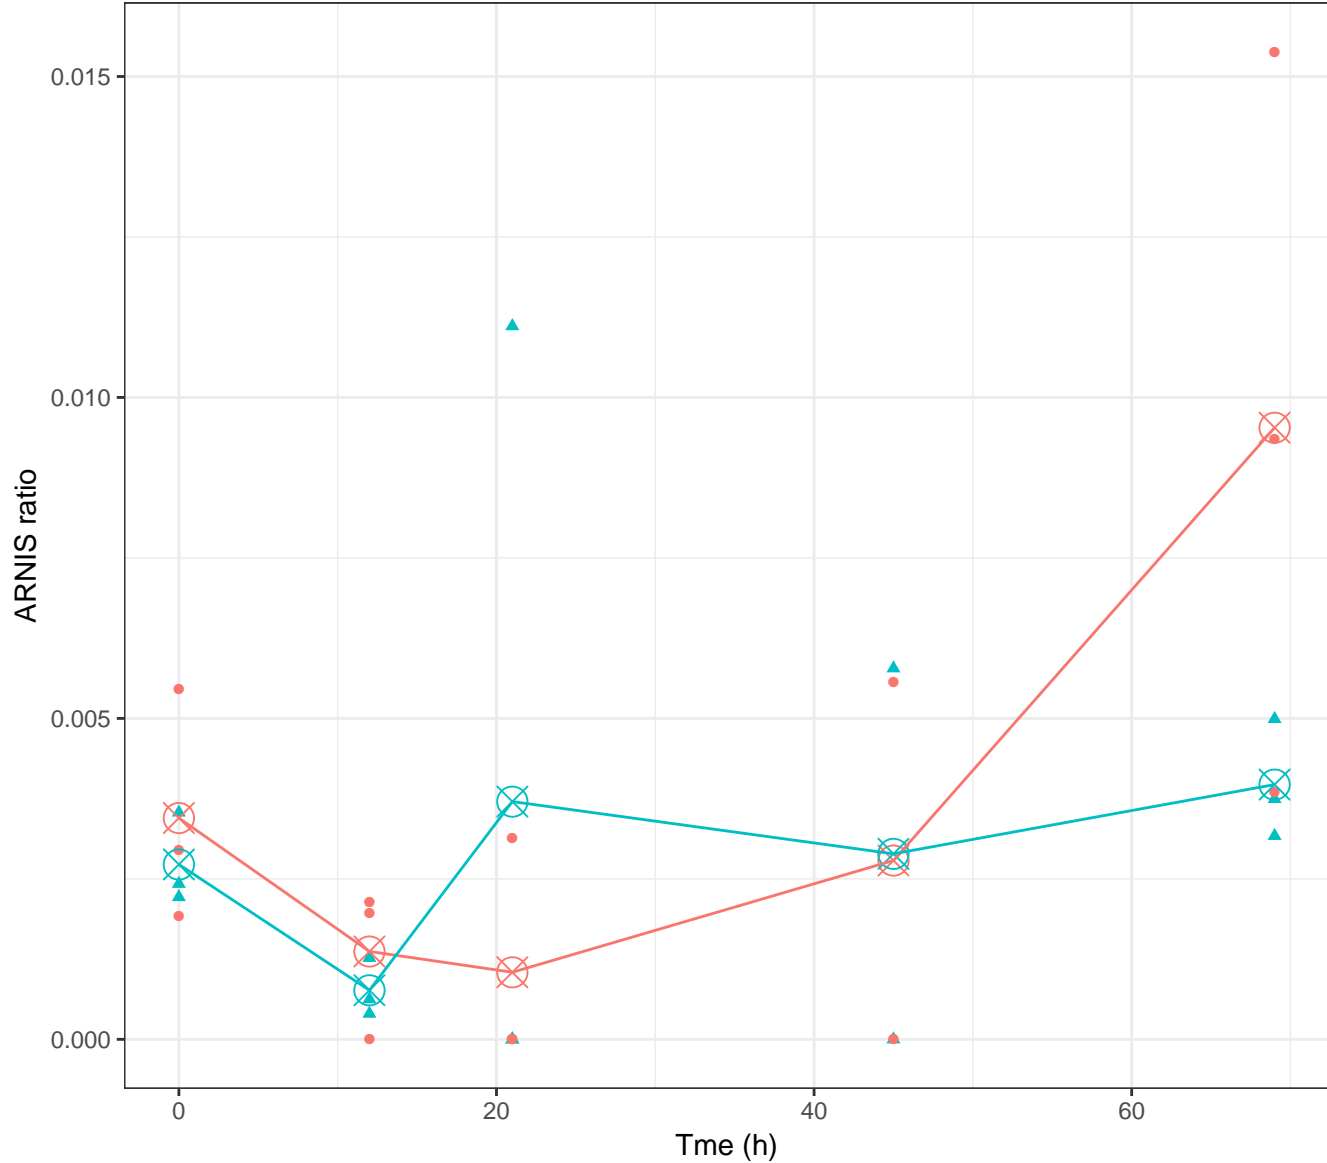

## OTU.664\_Planctomyces\_Planctomycetaceae

Treatment  Control  Filtered-1micron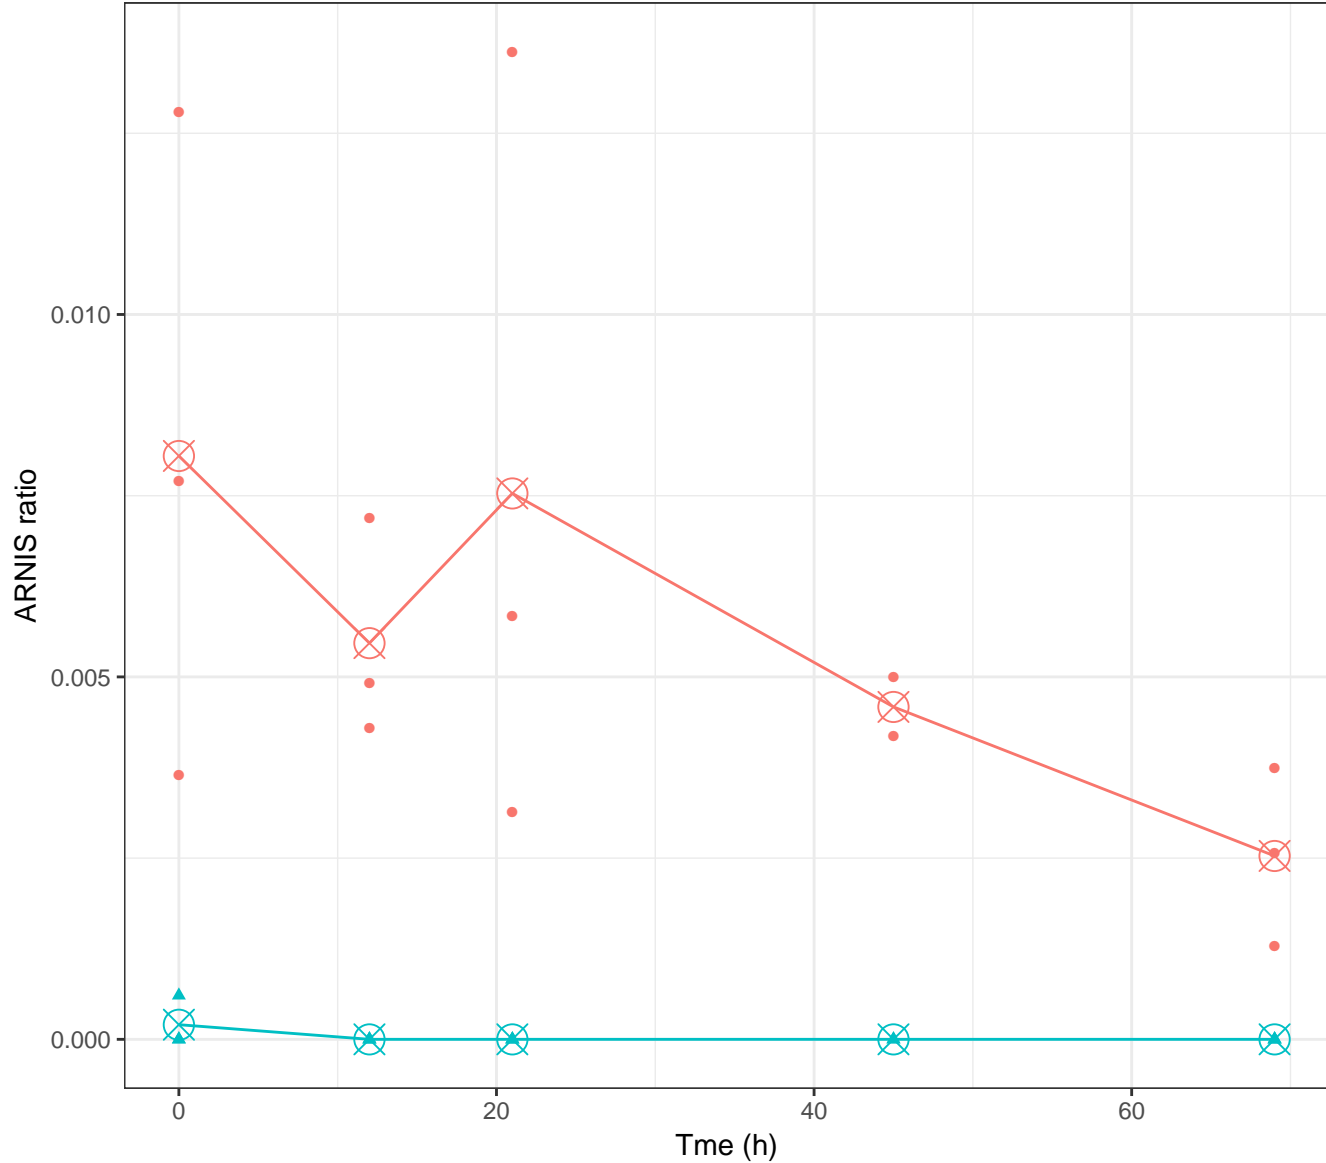

## OTU.1230\_Actinobacteria\_clade\_acSTL

Treatment  Control  Filtered-1micron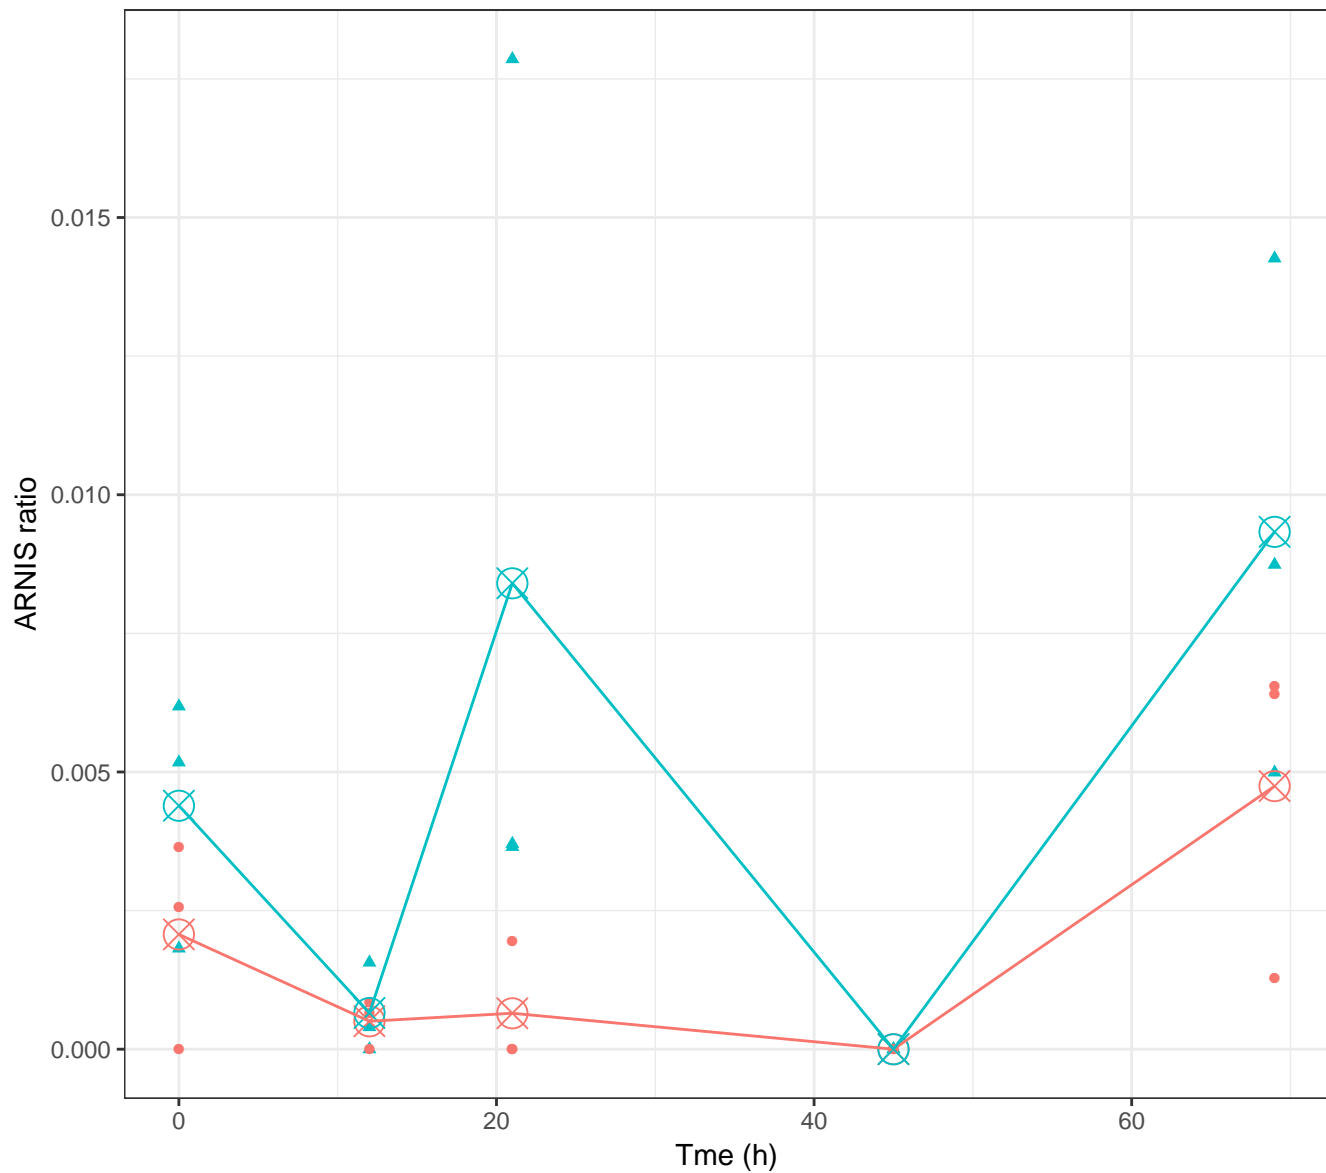

# OTU.218\_Planctomyces\_Planctomycetaceae

Treatment ⊗ Control ⊗ Filtered-1micron

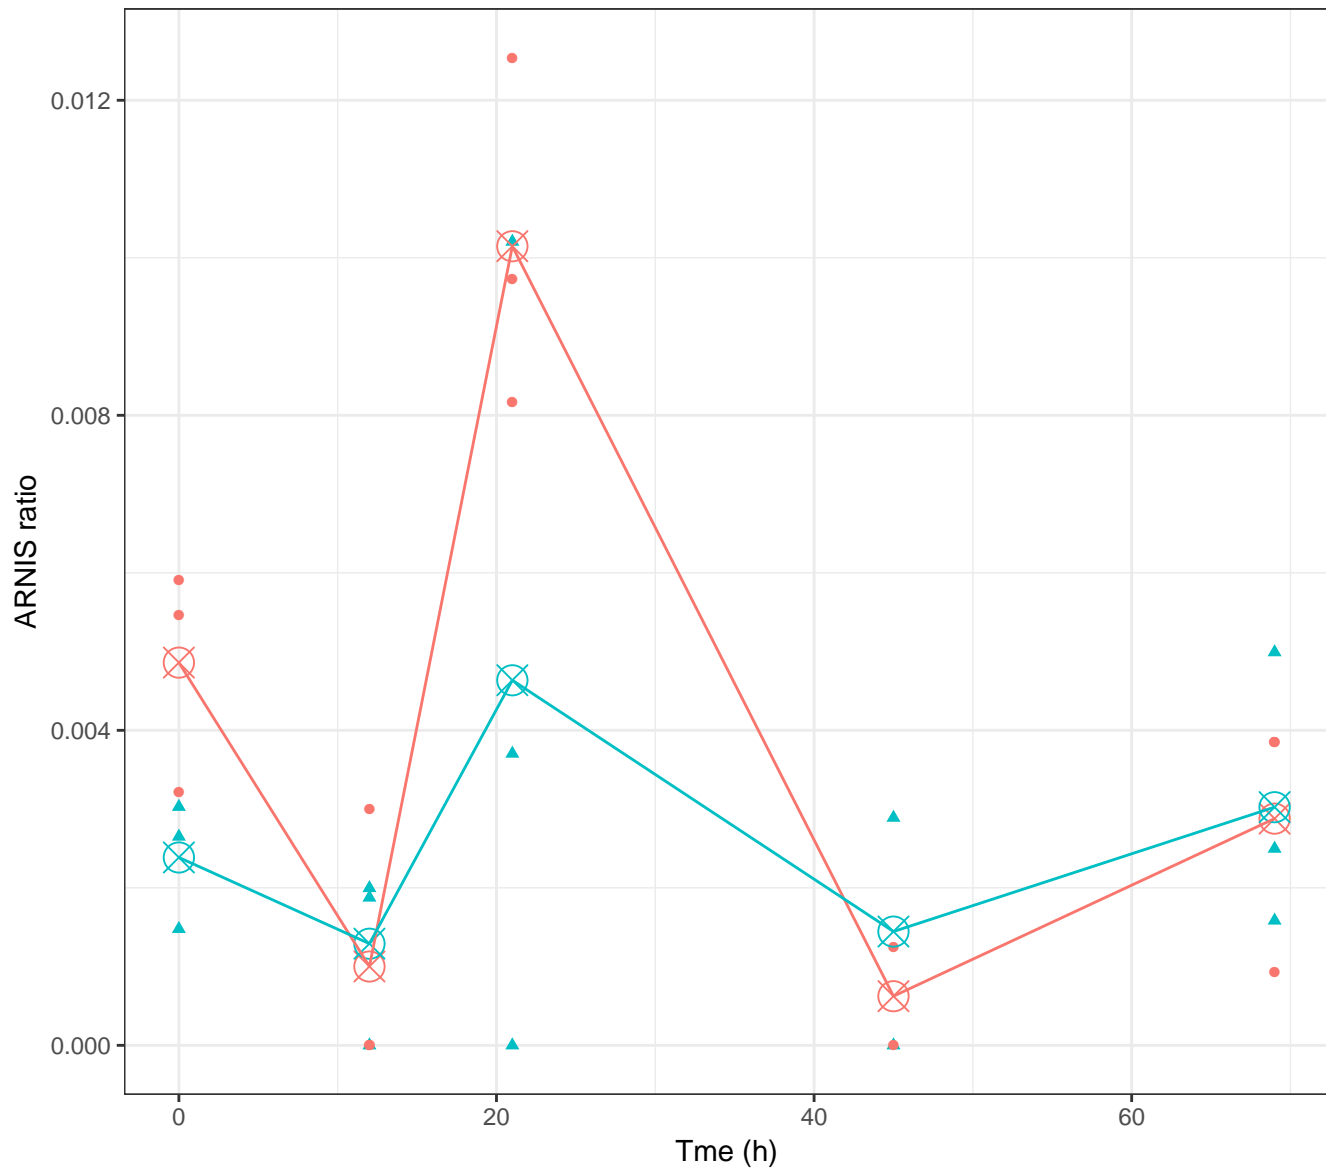

# OTU.803\_Deltaproteobacteria\_Sorangineae

Treatment ⊗ Control ⊗ Filtered-1micron

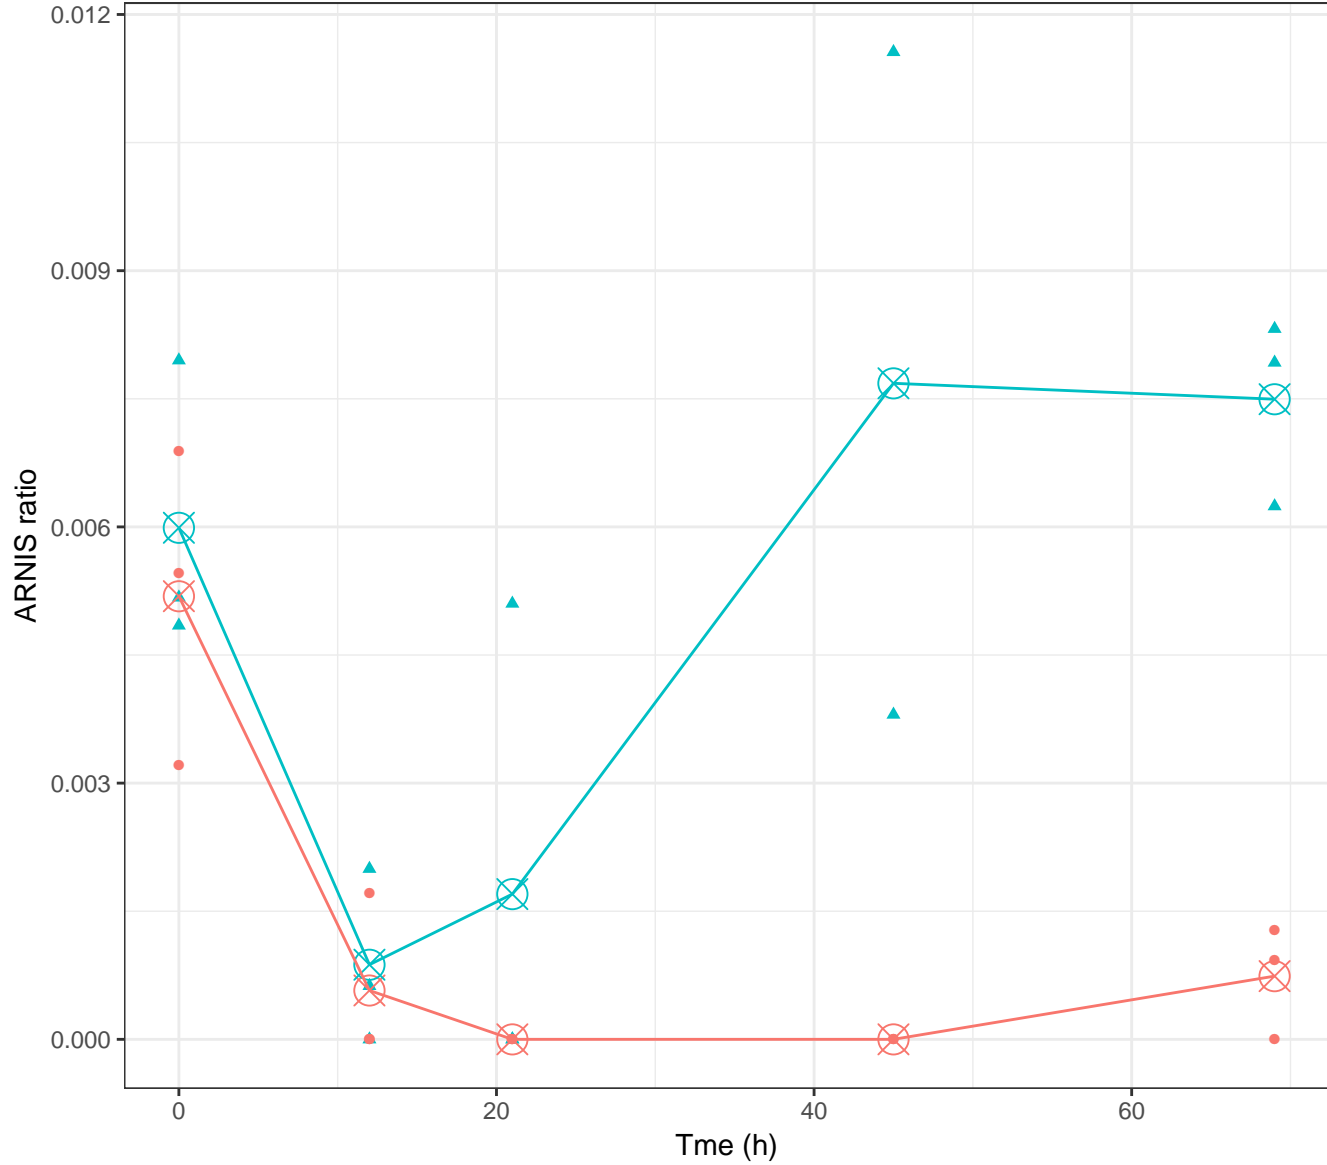



# OTU.7025\_Verrucomicrobia\_UA11

Treatment ⊗ Control ⊗ Filtered-1micron

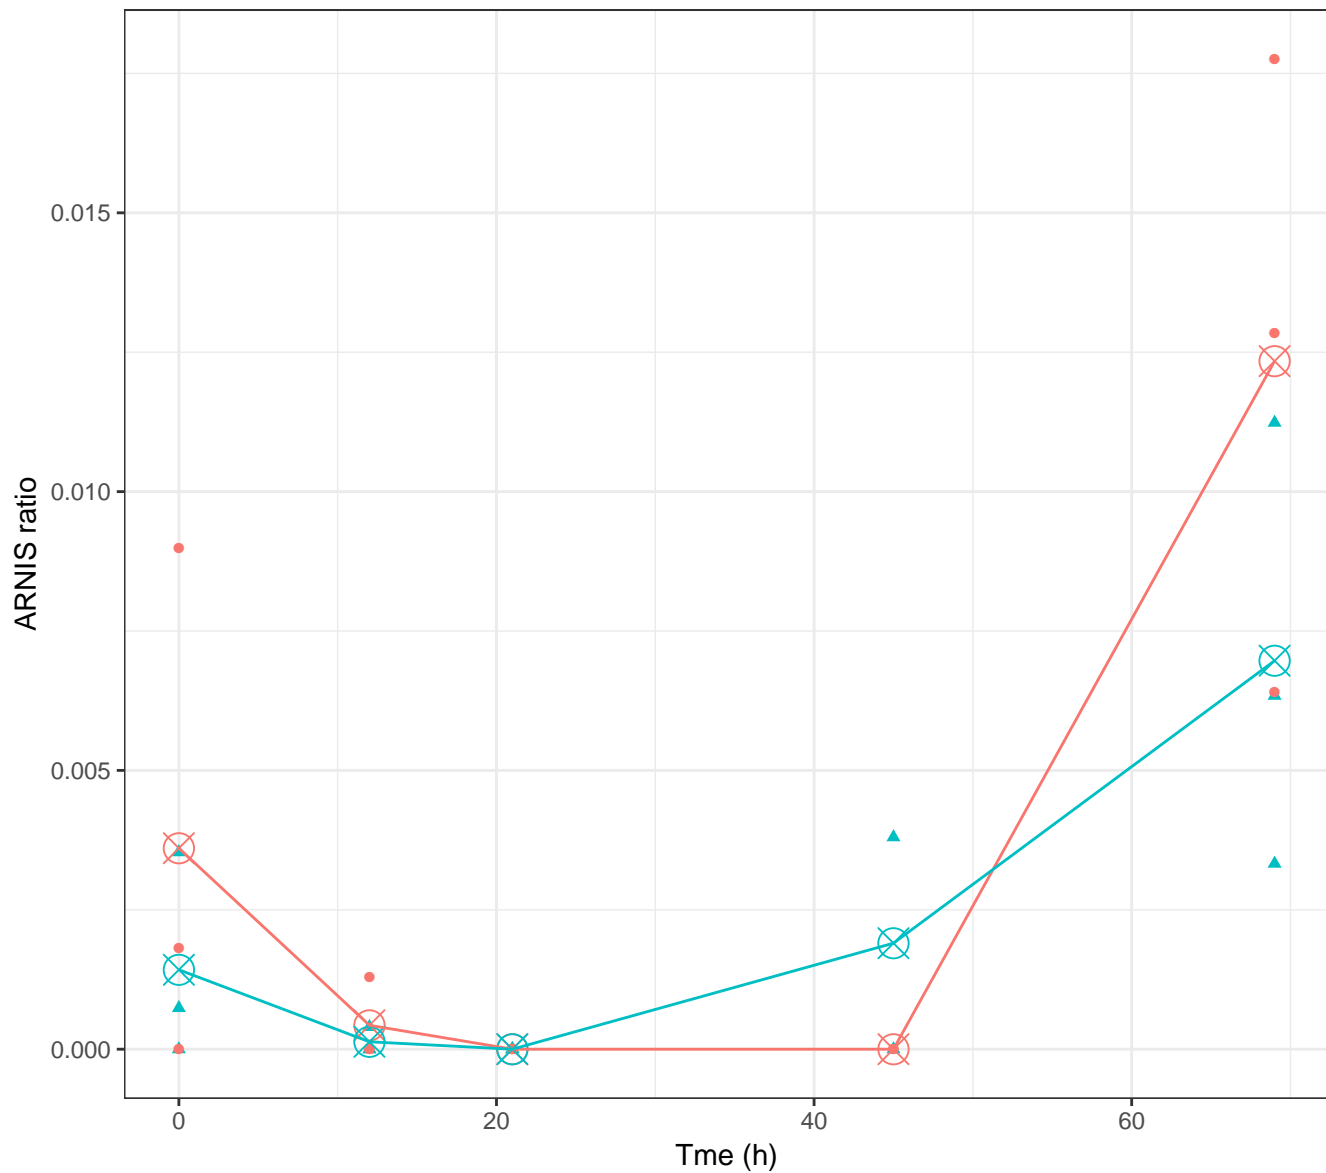

# OTU.635\_Gammaproteobacteria\_Legionella

Treatment Control Filtered-1micron

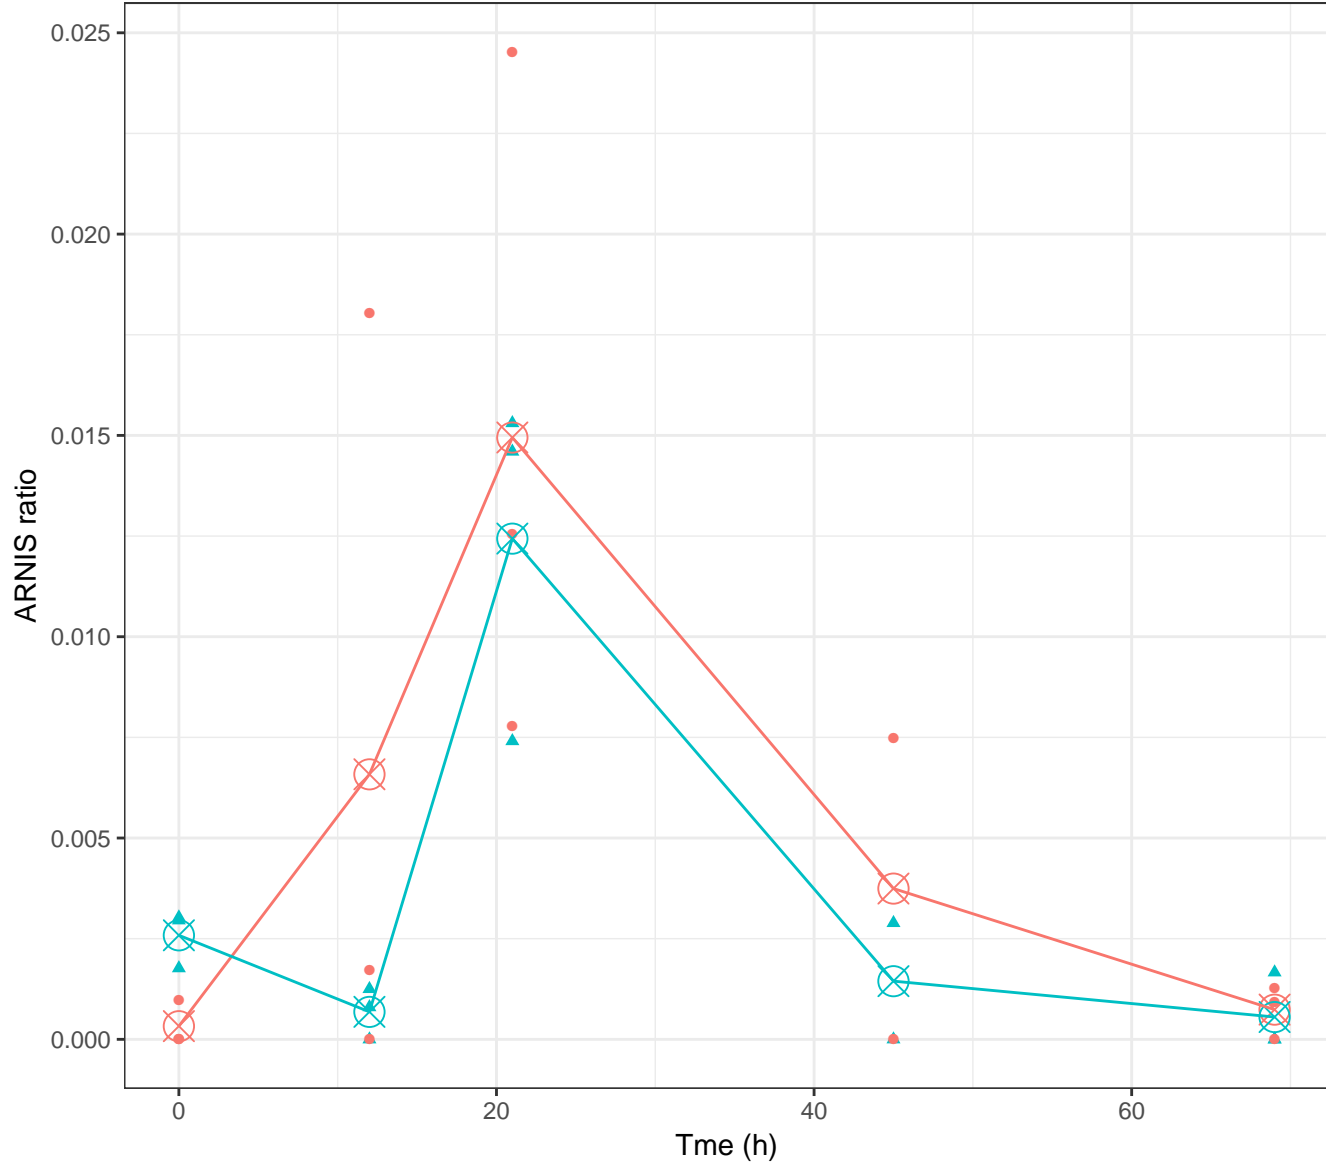

# OTU.623\_Firmicutes\_Streptococcus

Treatment ⊗ Control ⊗ Filtered-1micron

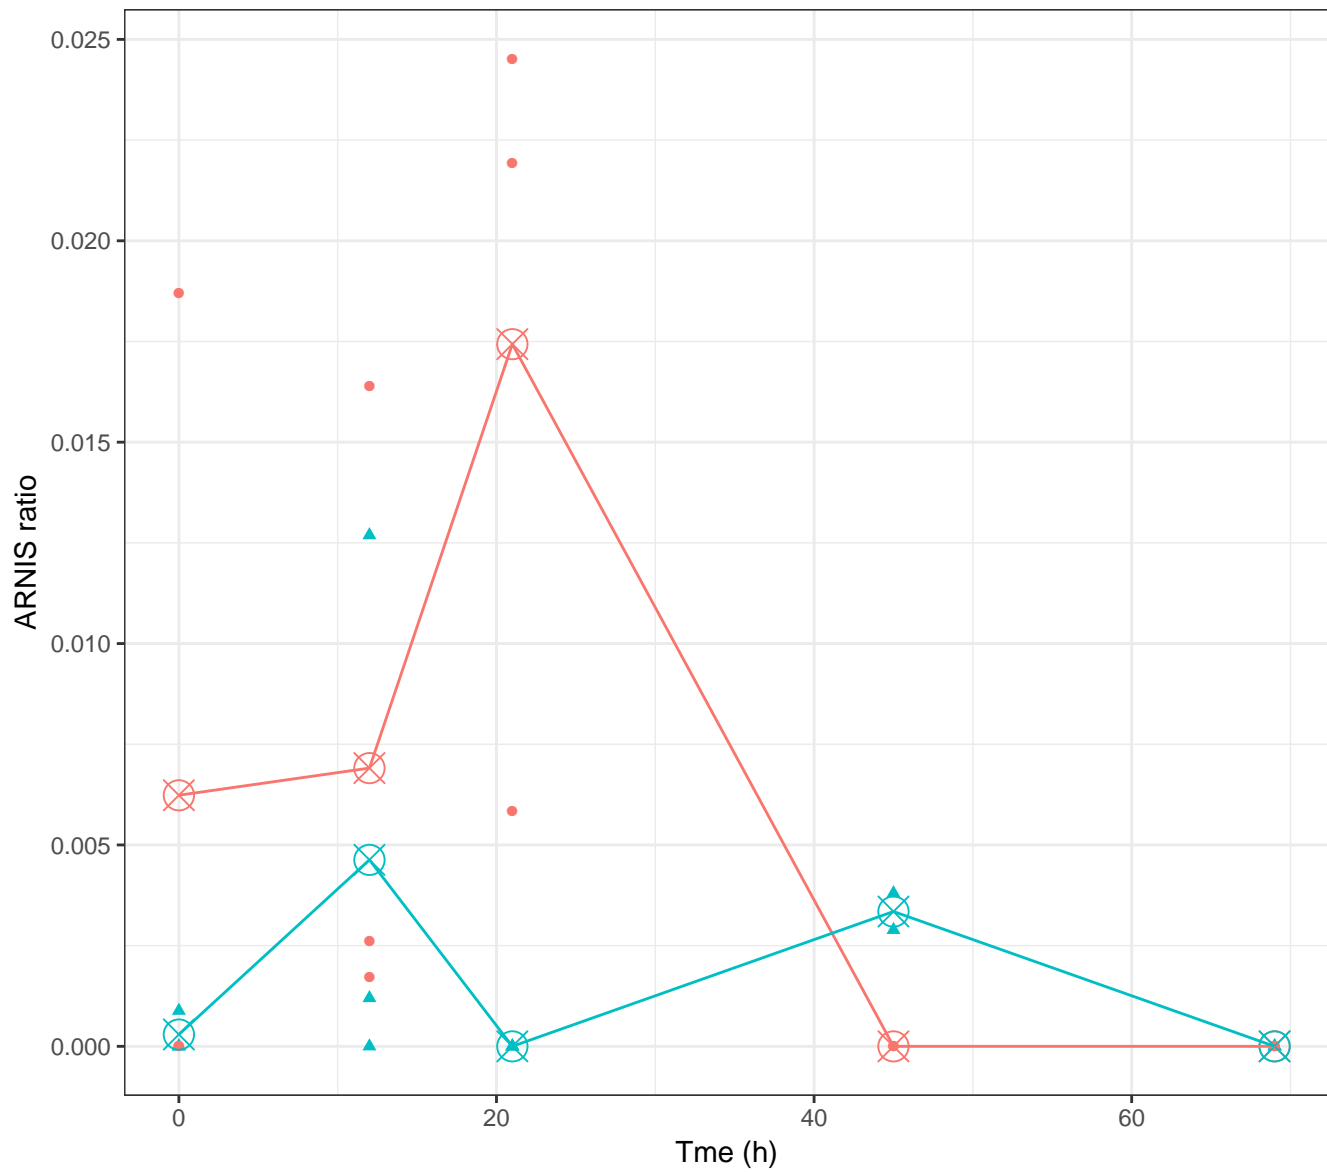

# OTU.162\_Actinobacteria\_clade\_acl.B1

Treatment ⊗ Control ⊗ Filtered-1micron

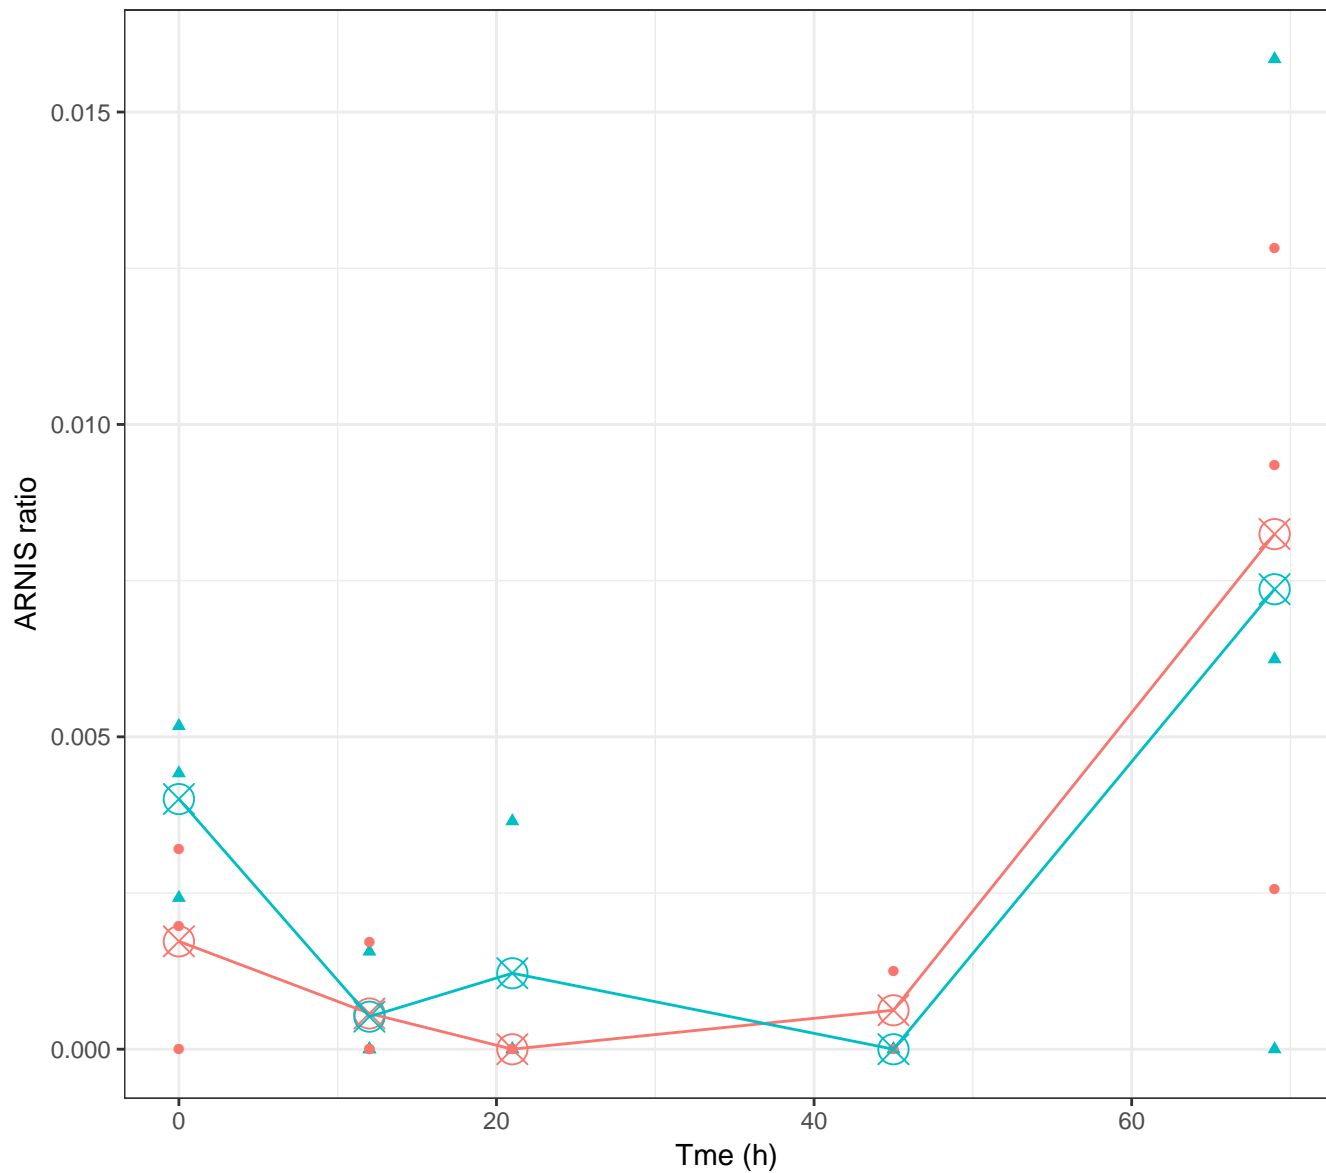

# OTU.912\_Betaproteobacteria\_Comamonadaceae

Treatment ⊗ Control ⊗ Filtered-1micron

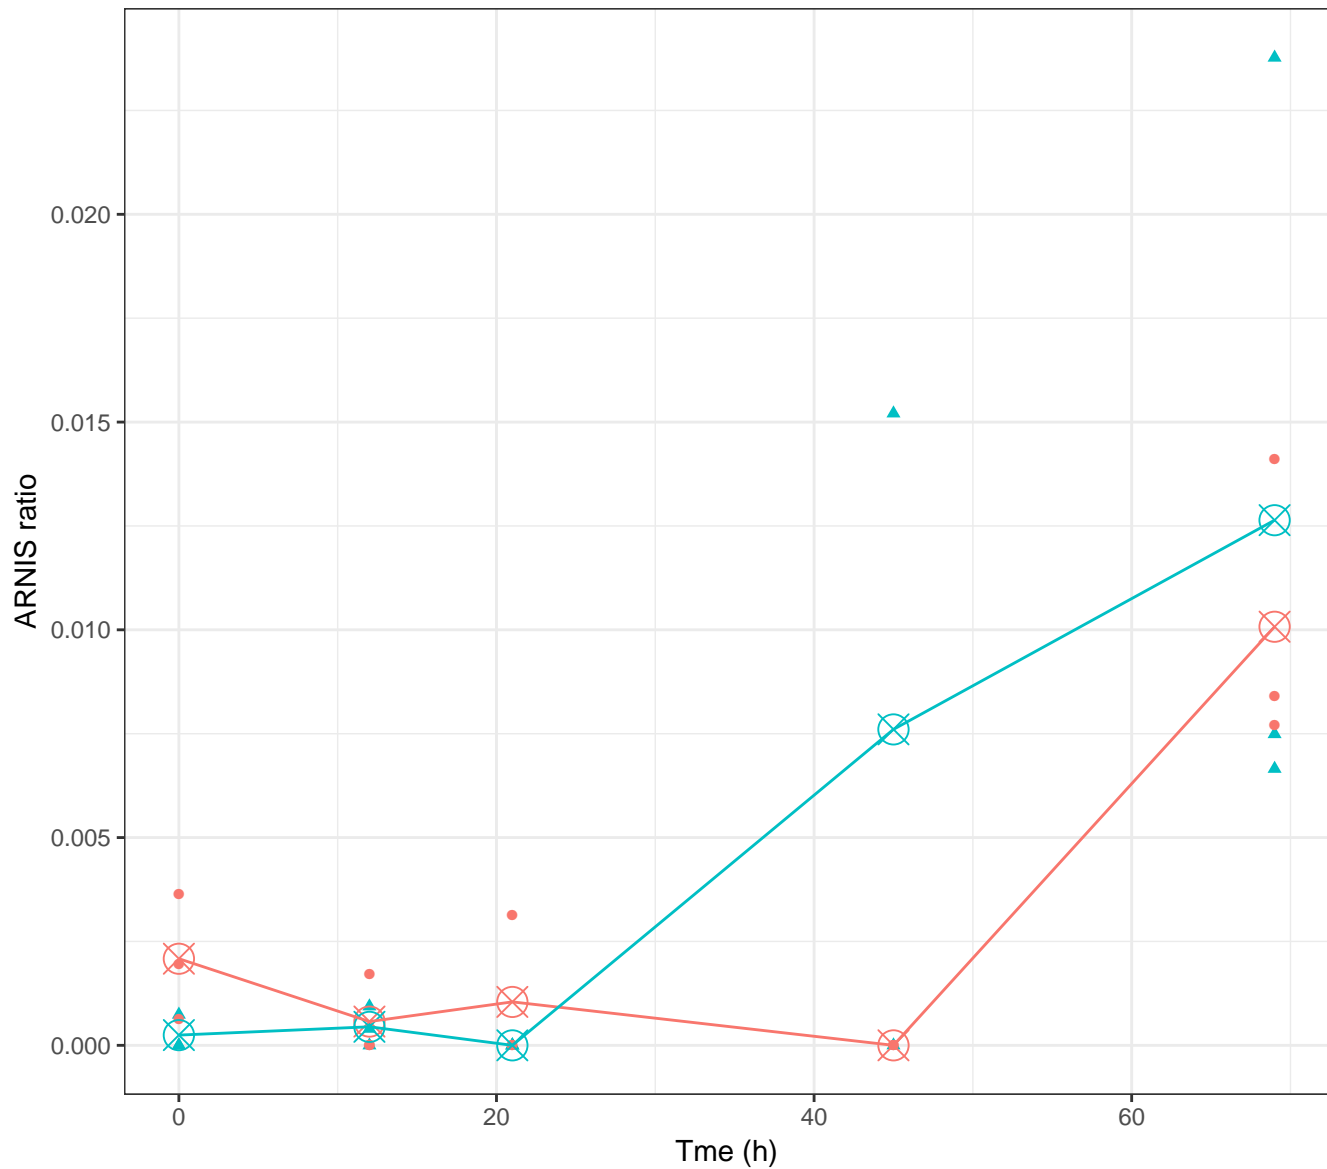

# OTU.352\_Actinobacteria\_CL500.29\_marine\_group.freshwater\_aclV.A\_clade

Treatment ⊗ Control ⊗ Filtered-1micron

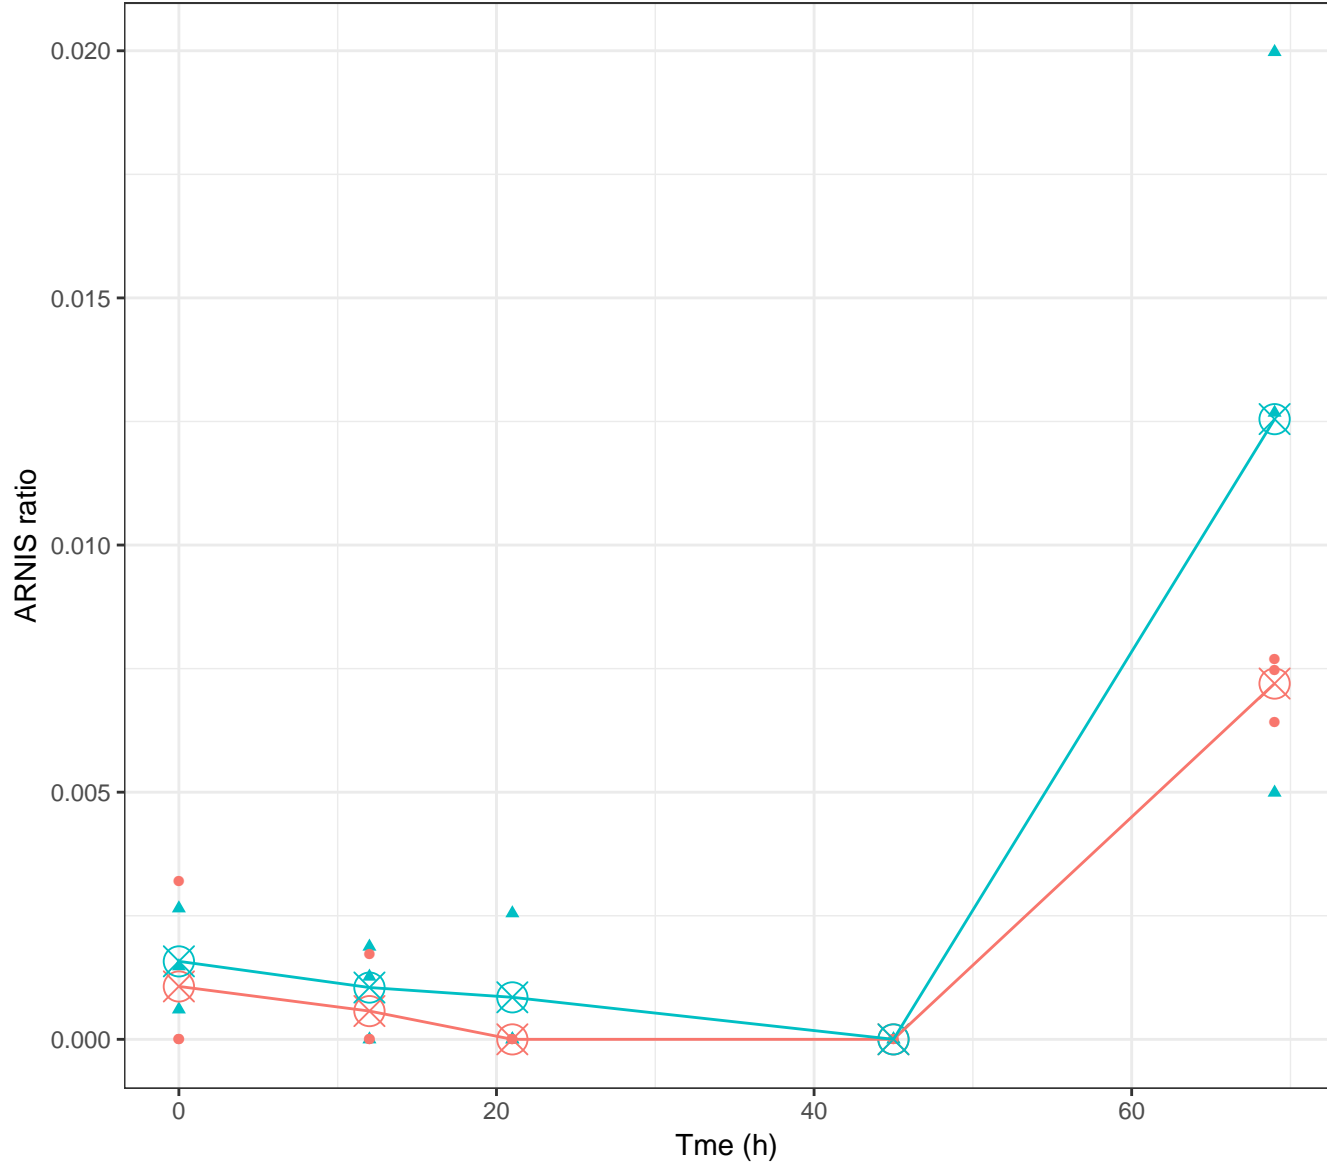

# OTU.1269\_Betaproteobacteria\_Comamonadaceae

Treatment Control Filtered-1micron

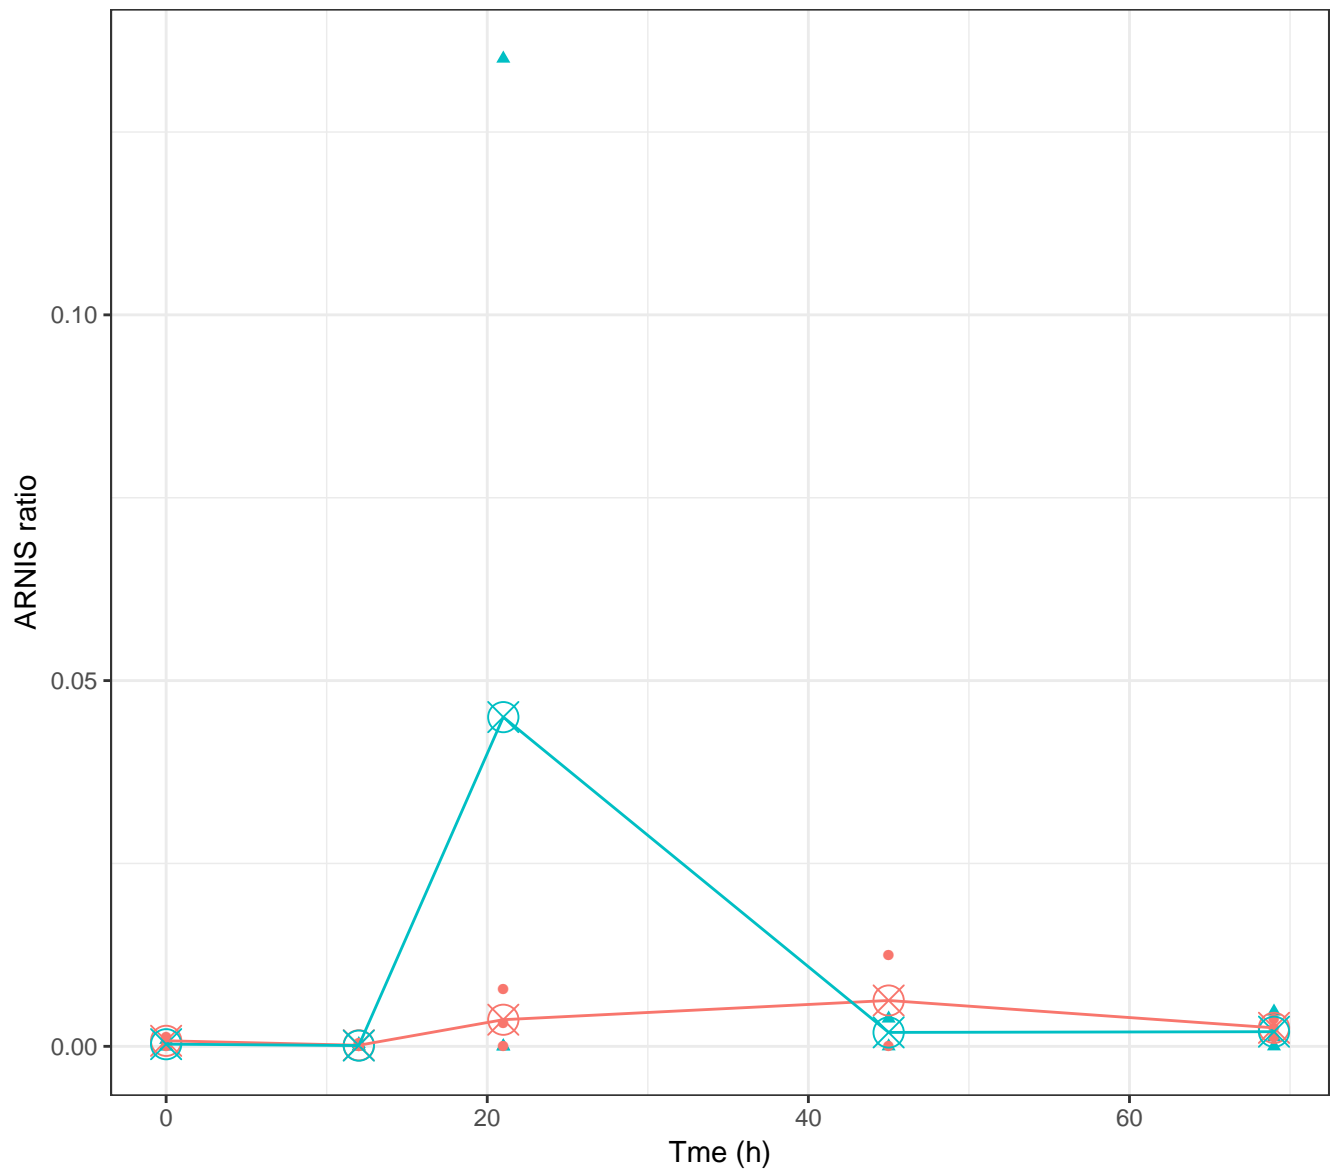

# OTU.943\_Bacteroidetes\_Cytophagaceae

Treatment Control Filtered-1micron

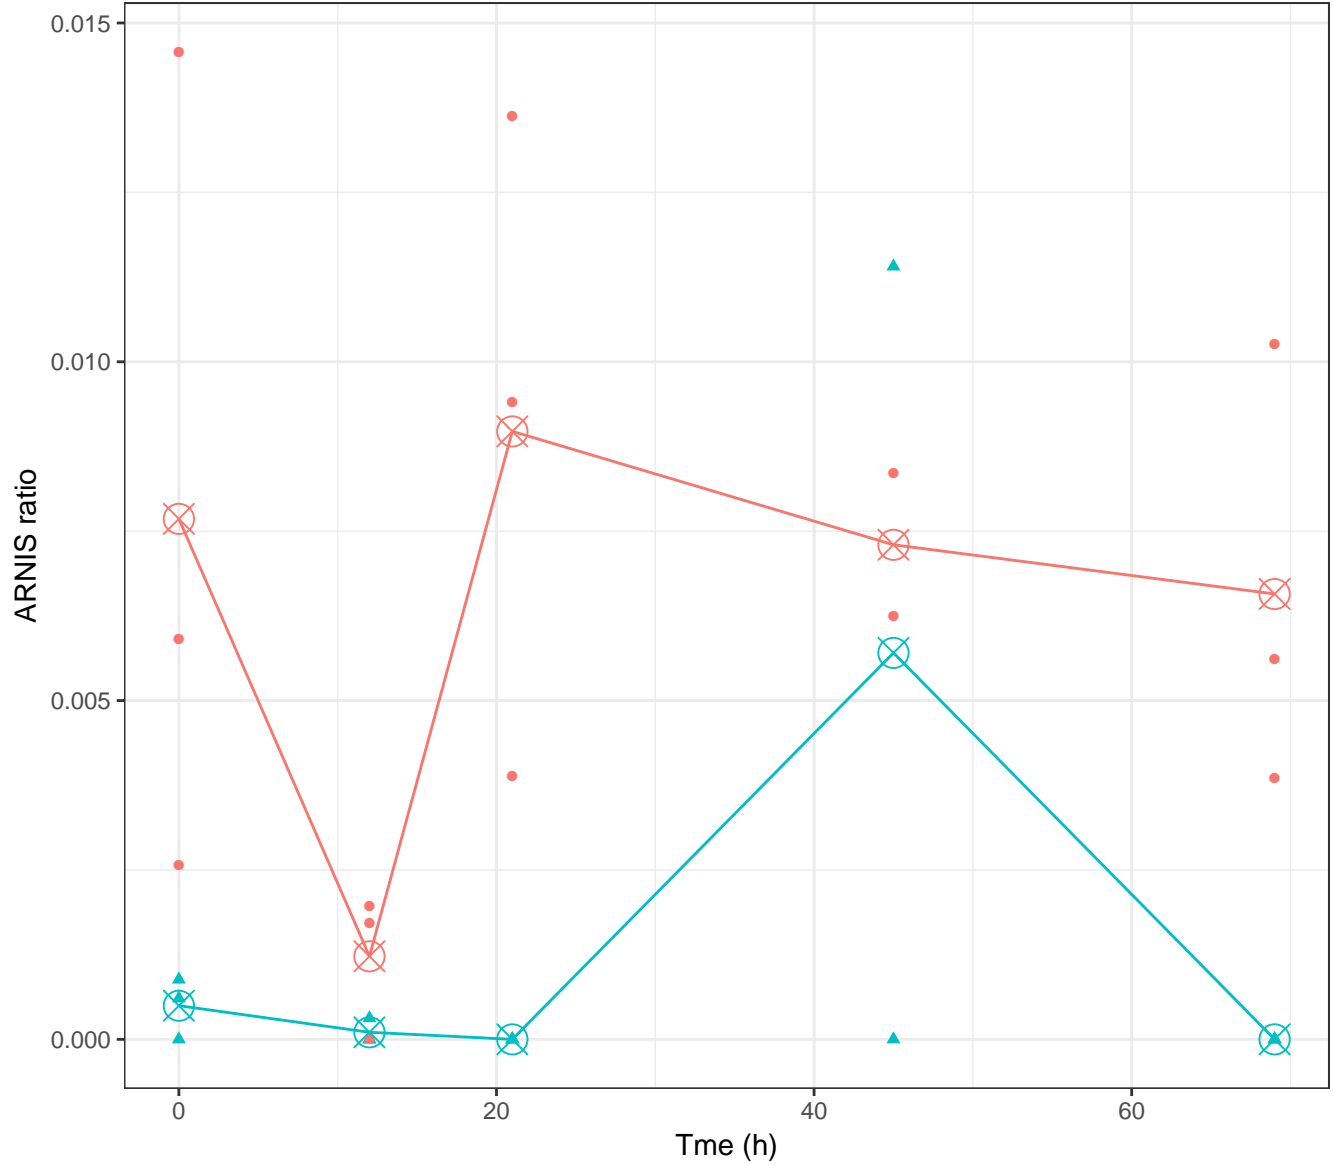



# OTU.1090\_Proteobacteria\_TA18

Treatment ⊗ Control ⊗ Filtered-1micron

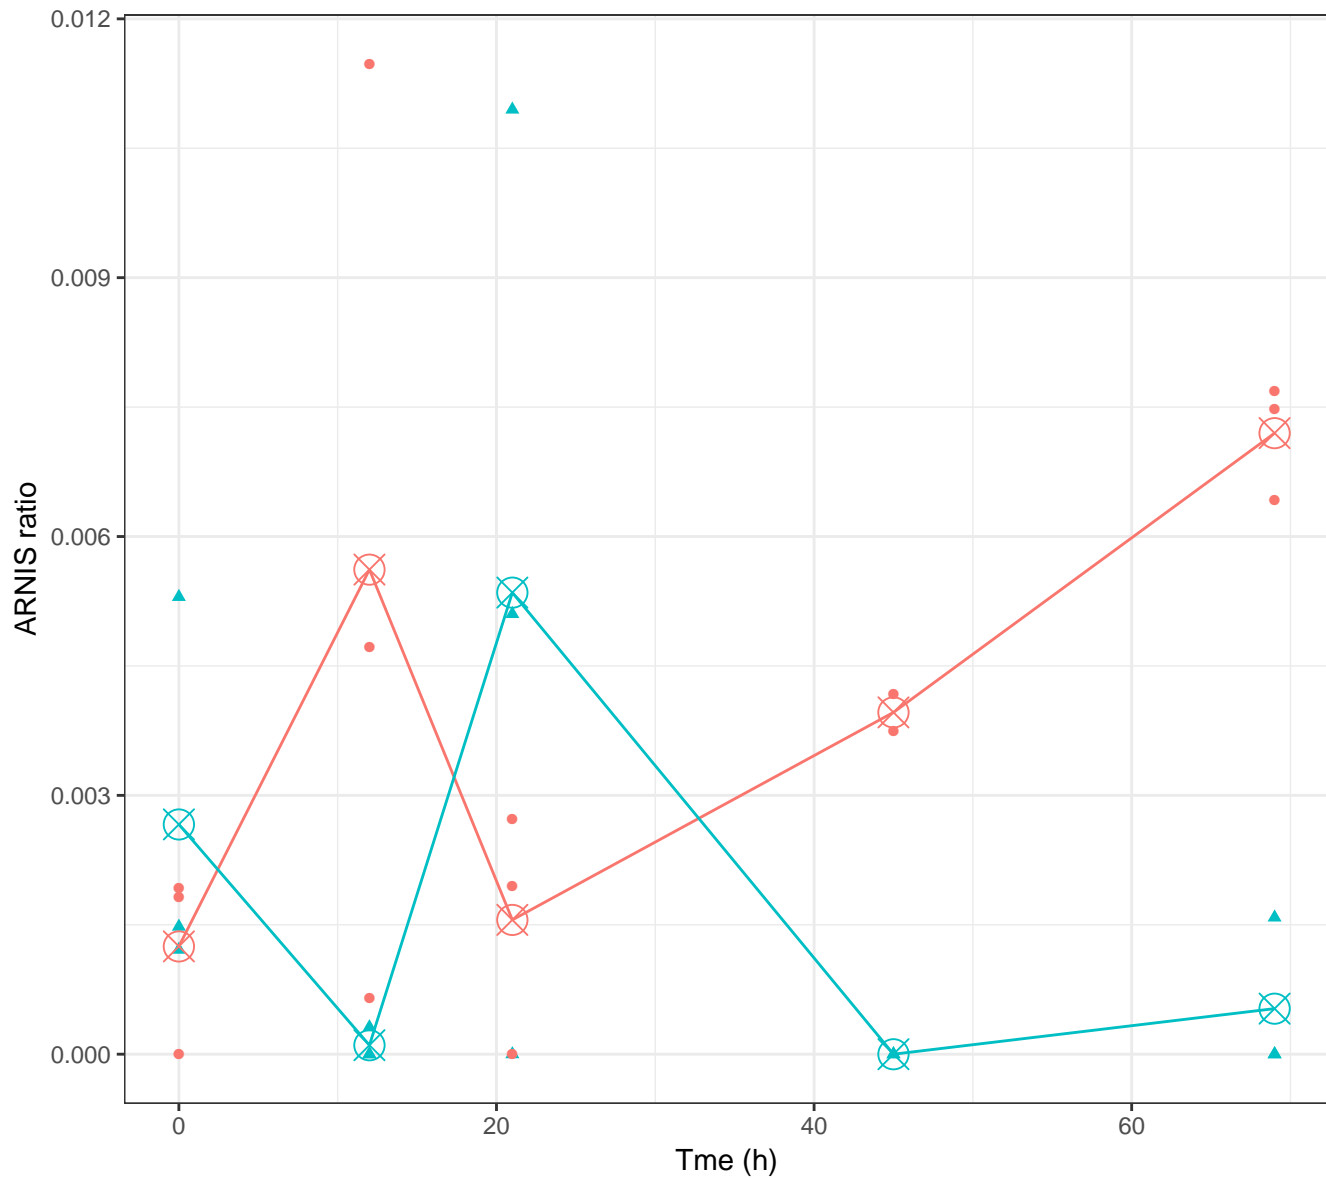

## OTU.5439\_Betaproteobacteria\_Comamonadaceae

Treatment  Control  Filtered-1micron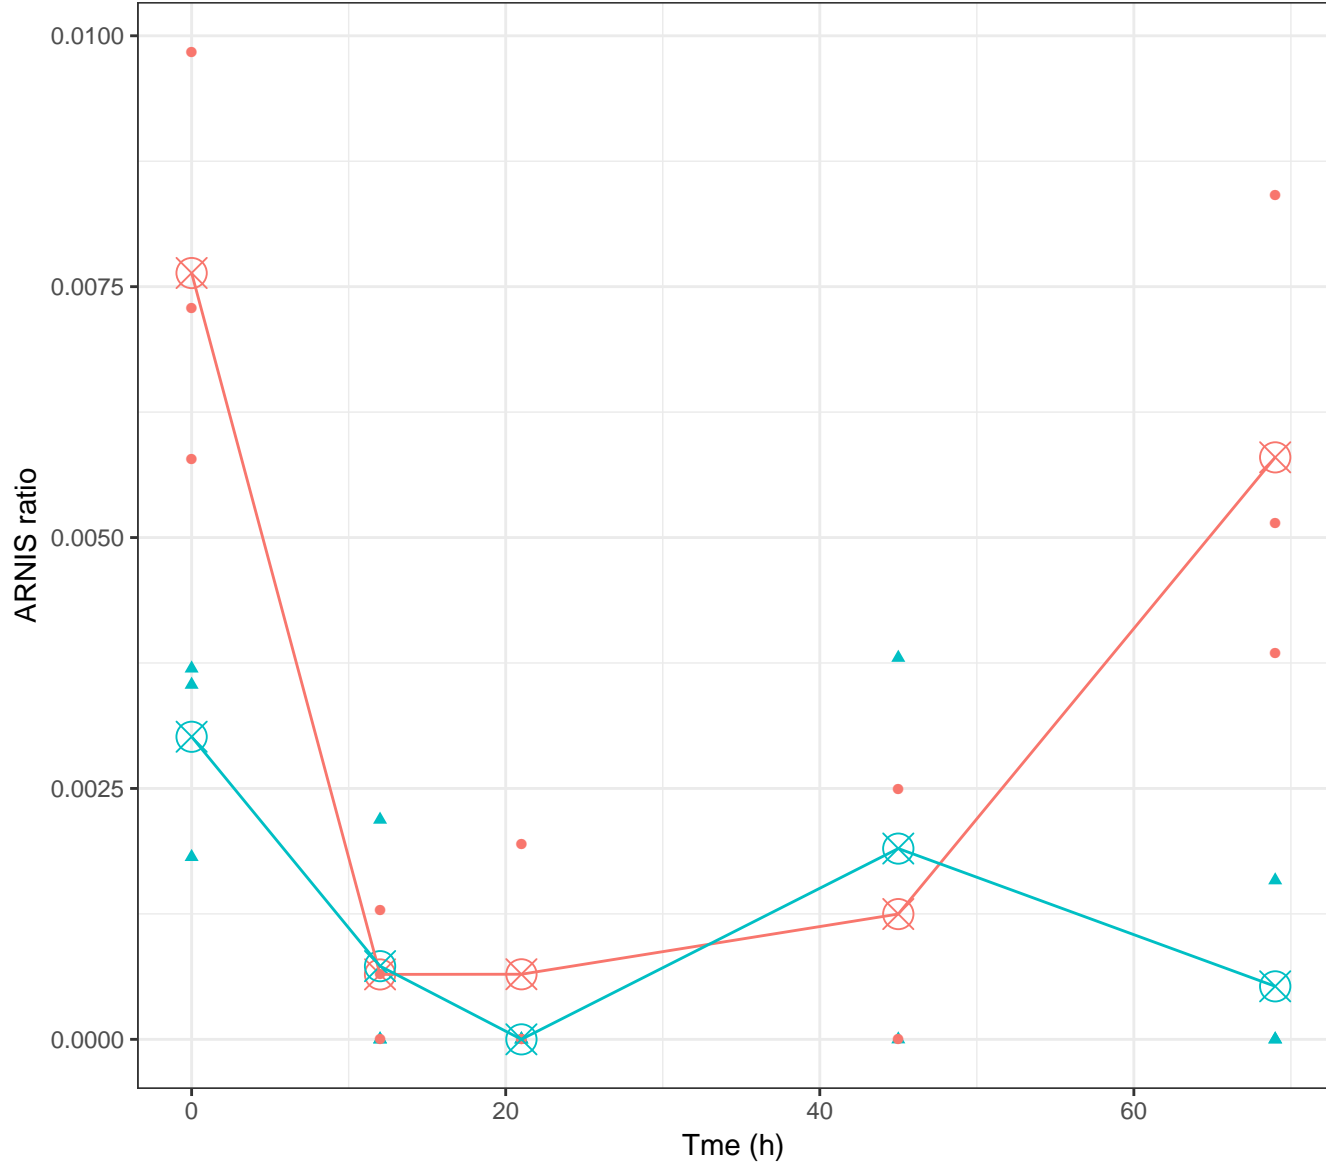

# OTU.136\_Actinobacteria\_Sporichthyaceae

Treatment  Control  Filtered-1micron

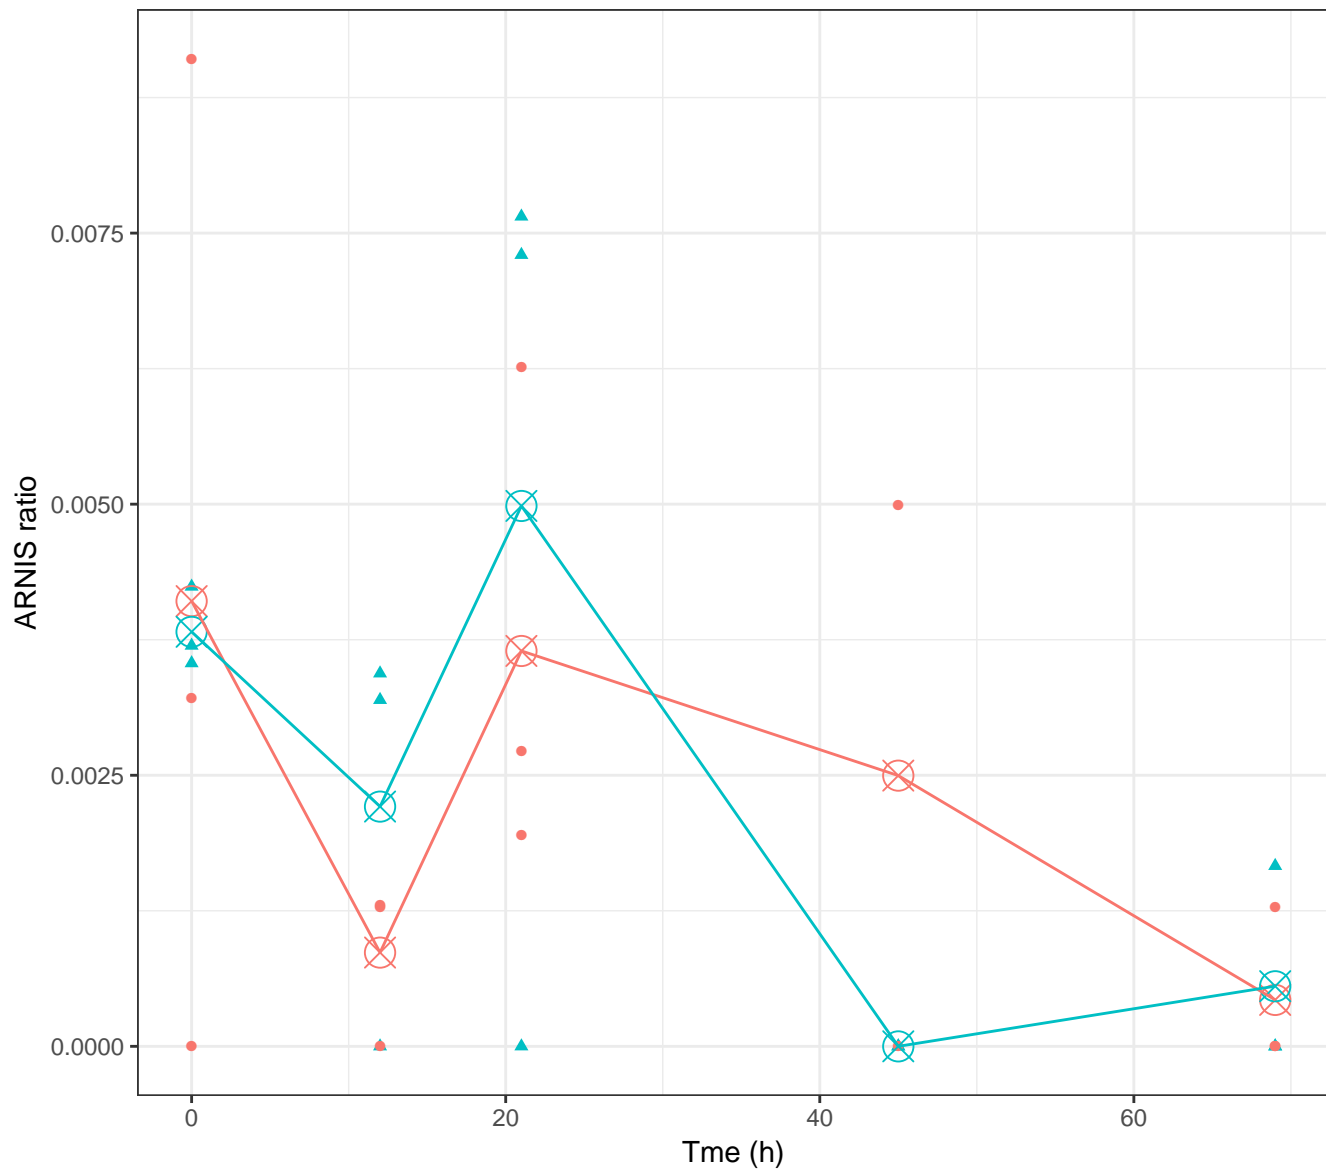

## OTU.115\_Betaproteobacteria\_TRA3.20

Treatment  Control  Filtered-1micron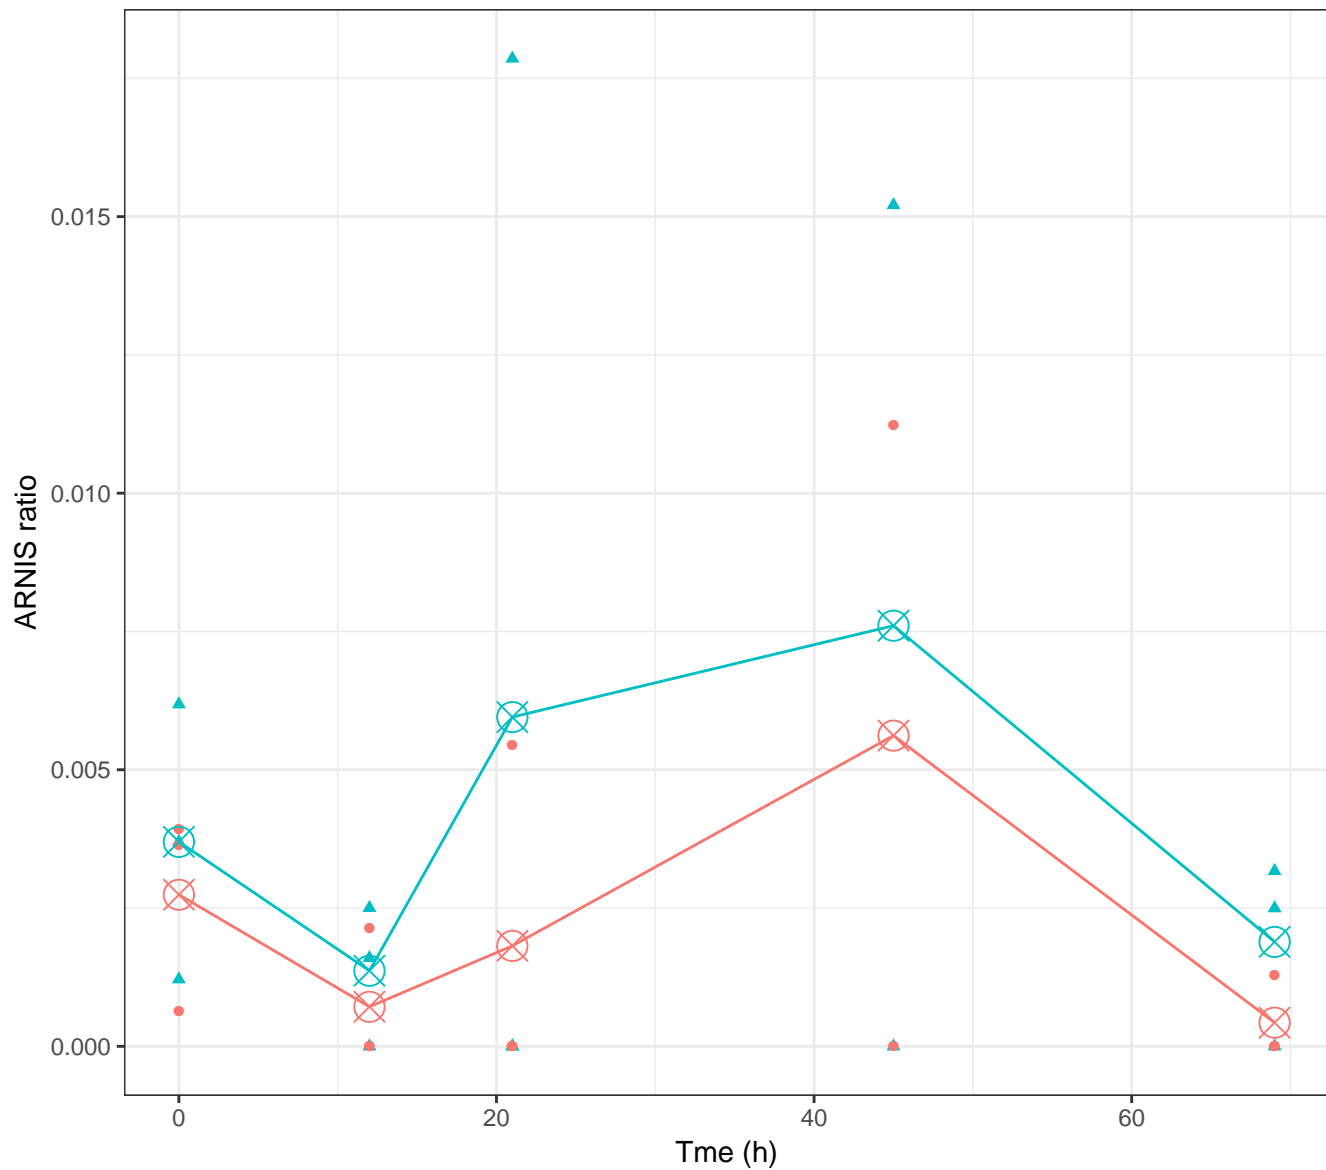

# OTU.8113\_Planctomycetes\_Planctomycetaceae

Treatment ⊗ Control ⊗ Filtered-1micron

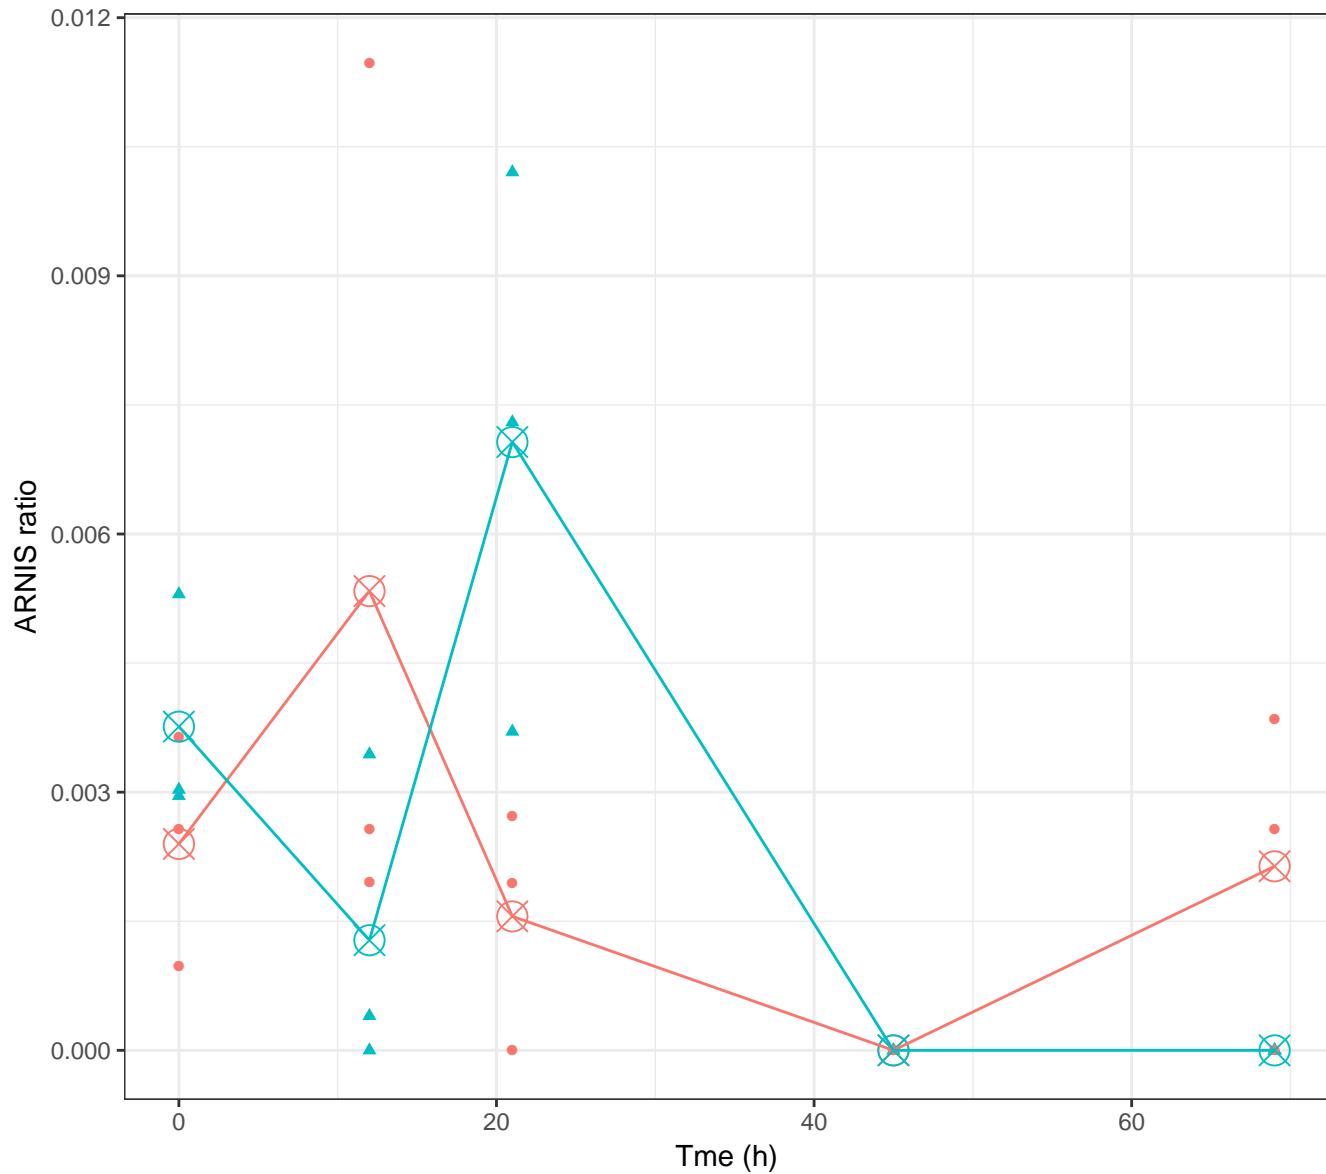

# OTU.1913\_Candidate\_division\_OD1

Treatment ⊗ Control ⊗ Filtered-1micron

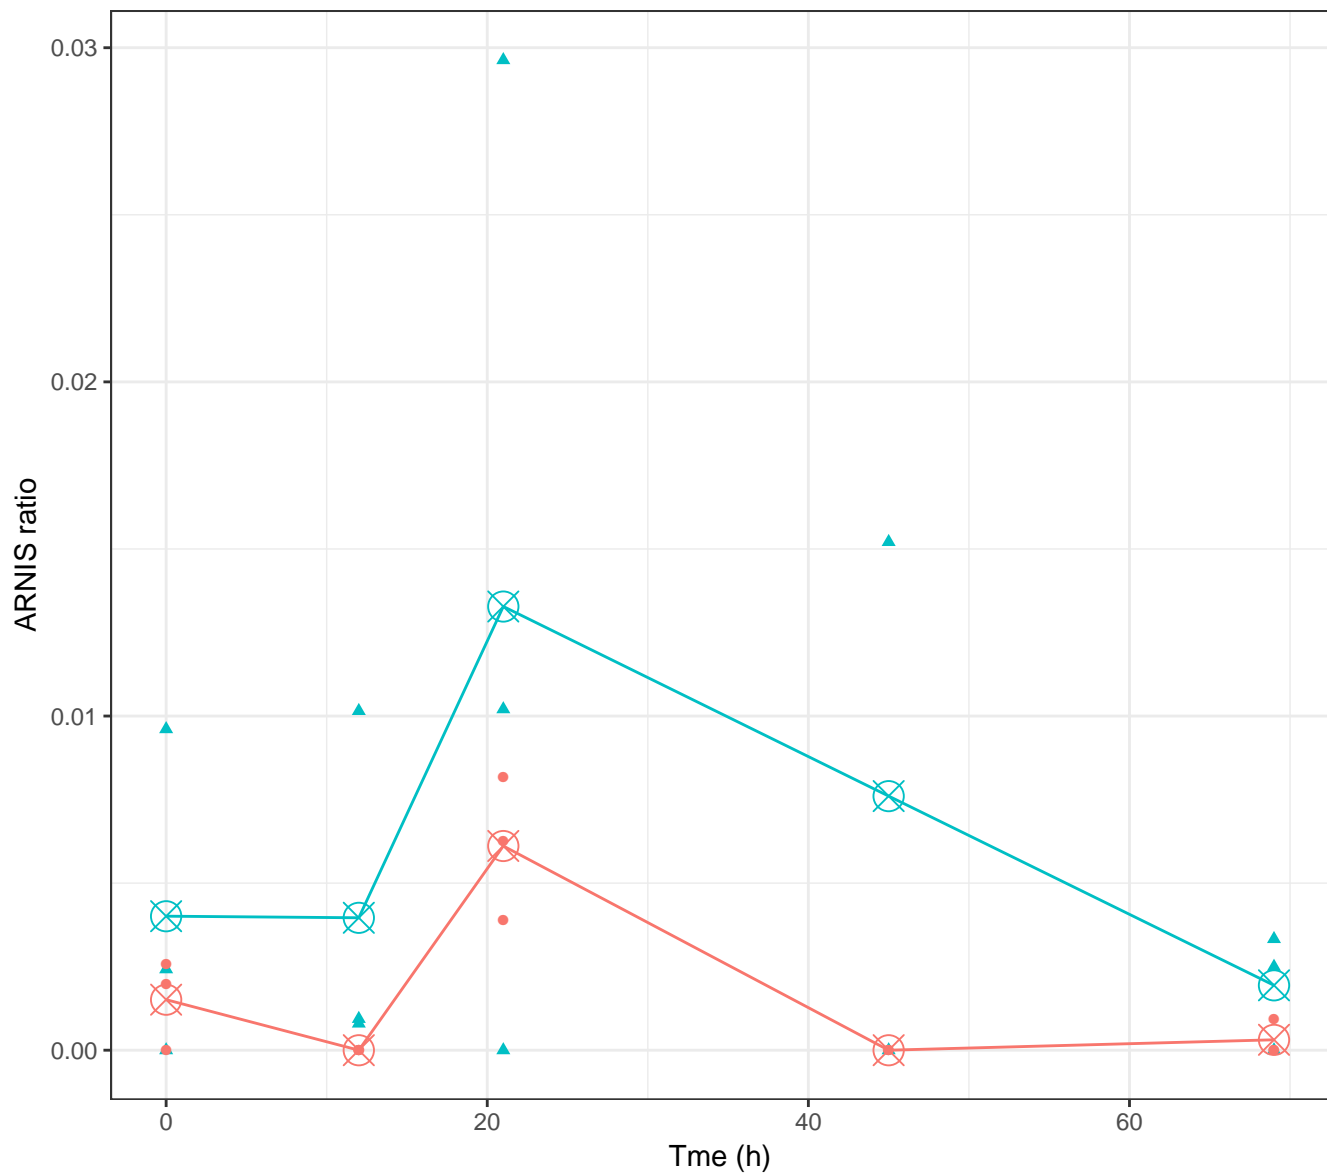

# OTU.882\_Bacteroidetes\_Hydrotalea

Treatment ⊗ Control ⊗ Filtered-1micron

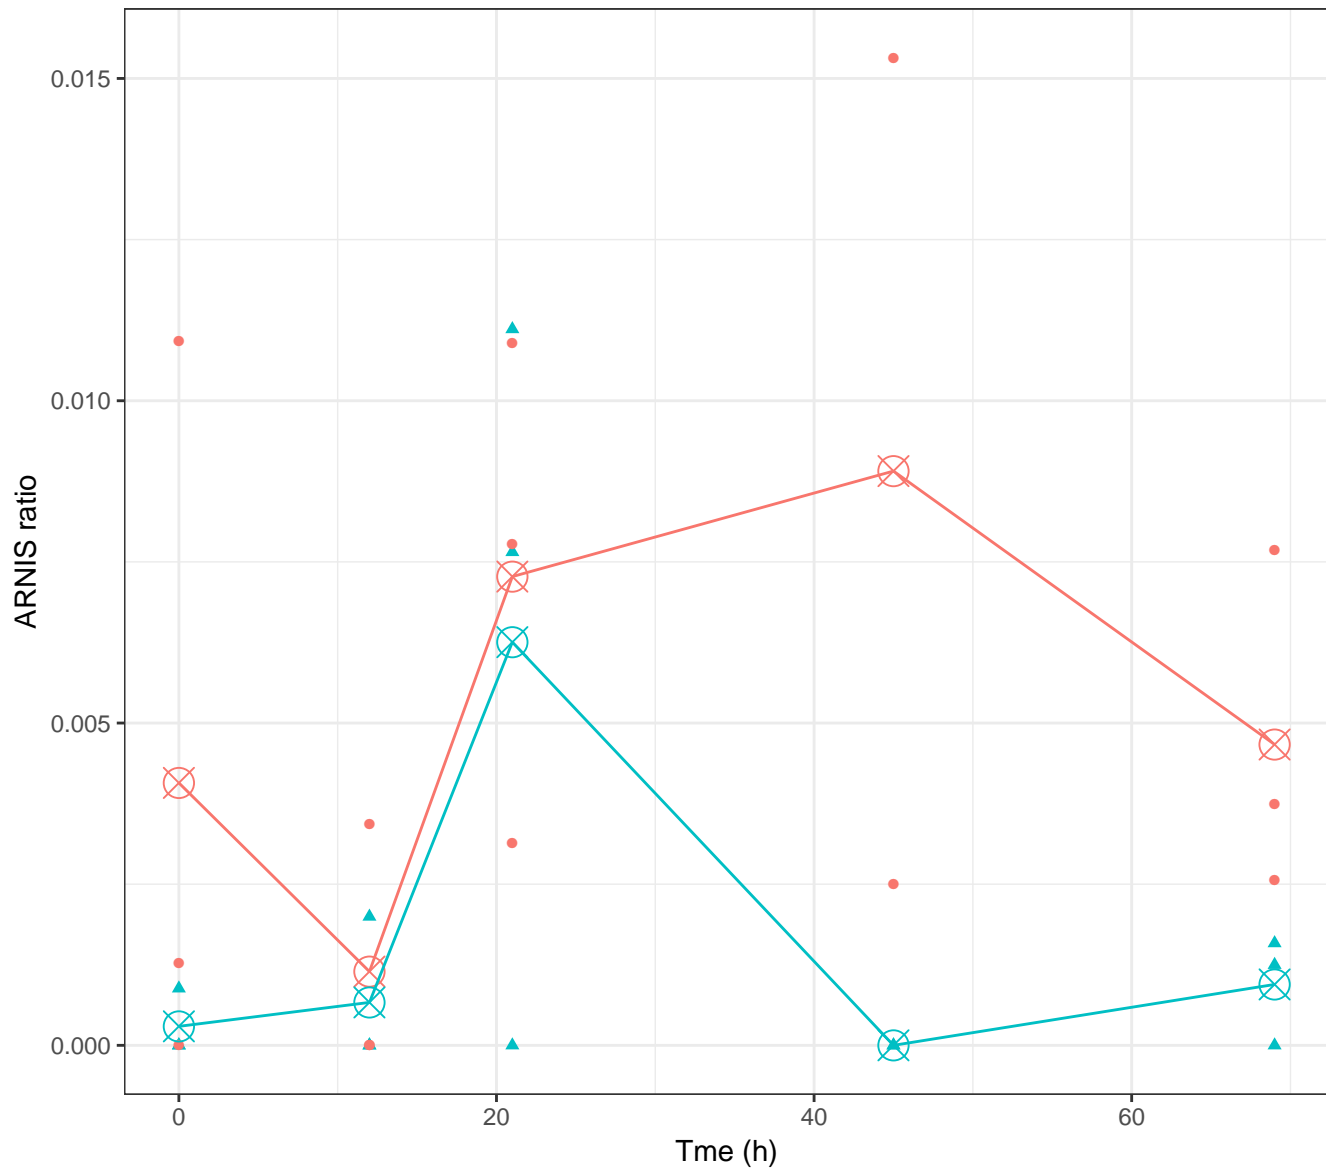

# OTU.1172\_Betaproteobacteria\_TRA3.20

Treatment ⊗ Control ⊗ Filtered-1micron

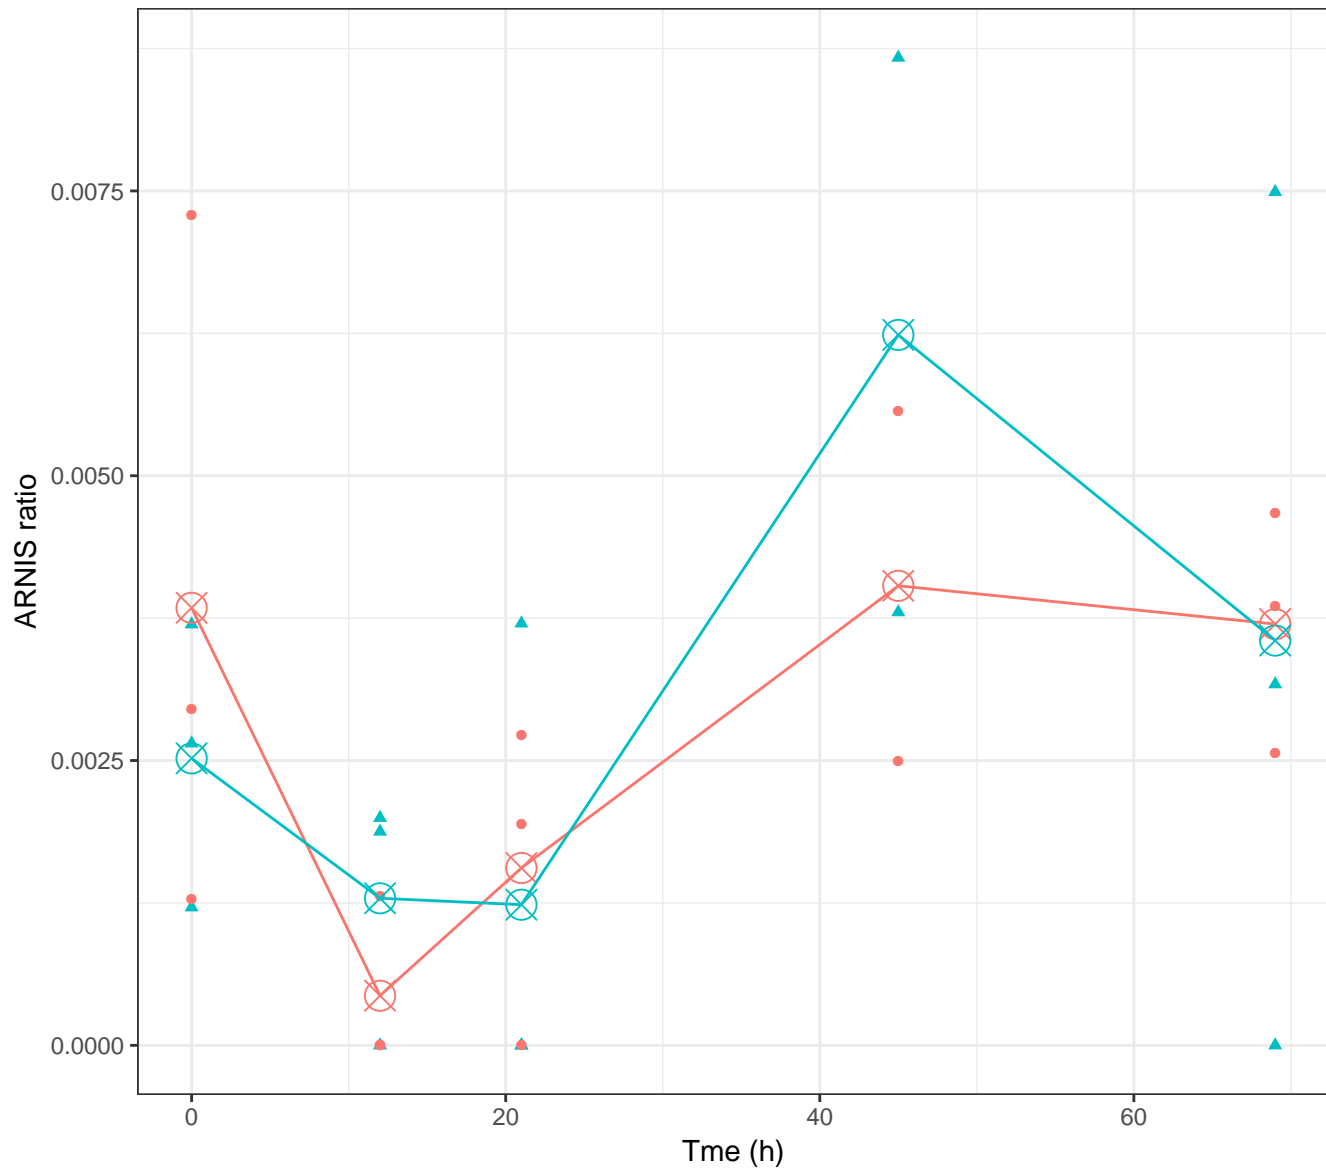



# OTU.919\_Chlamydiae\_Candidatus\_Rhabdochlamydia

Treatment Control Filtered-1micron

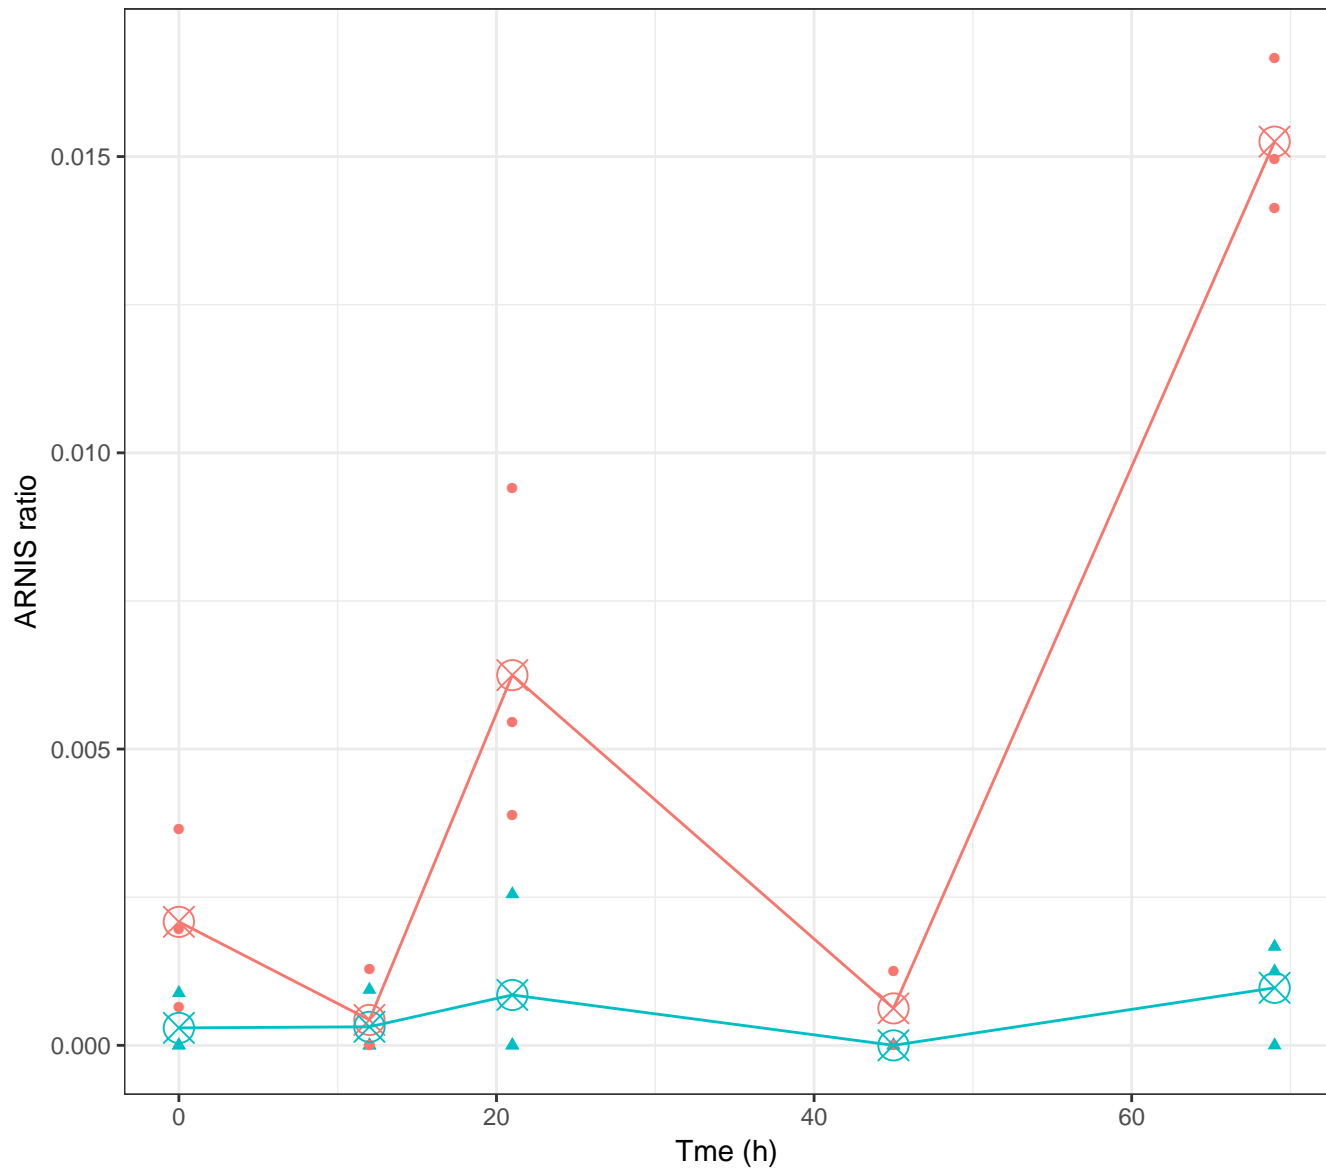

# OTU.1053\_Actinobacteria\_Acidimicrobinae

Treatment ⊗ Control ⊗ Filtered-1micron

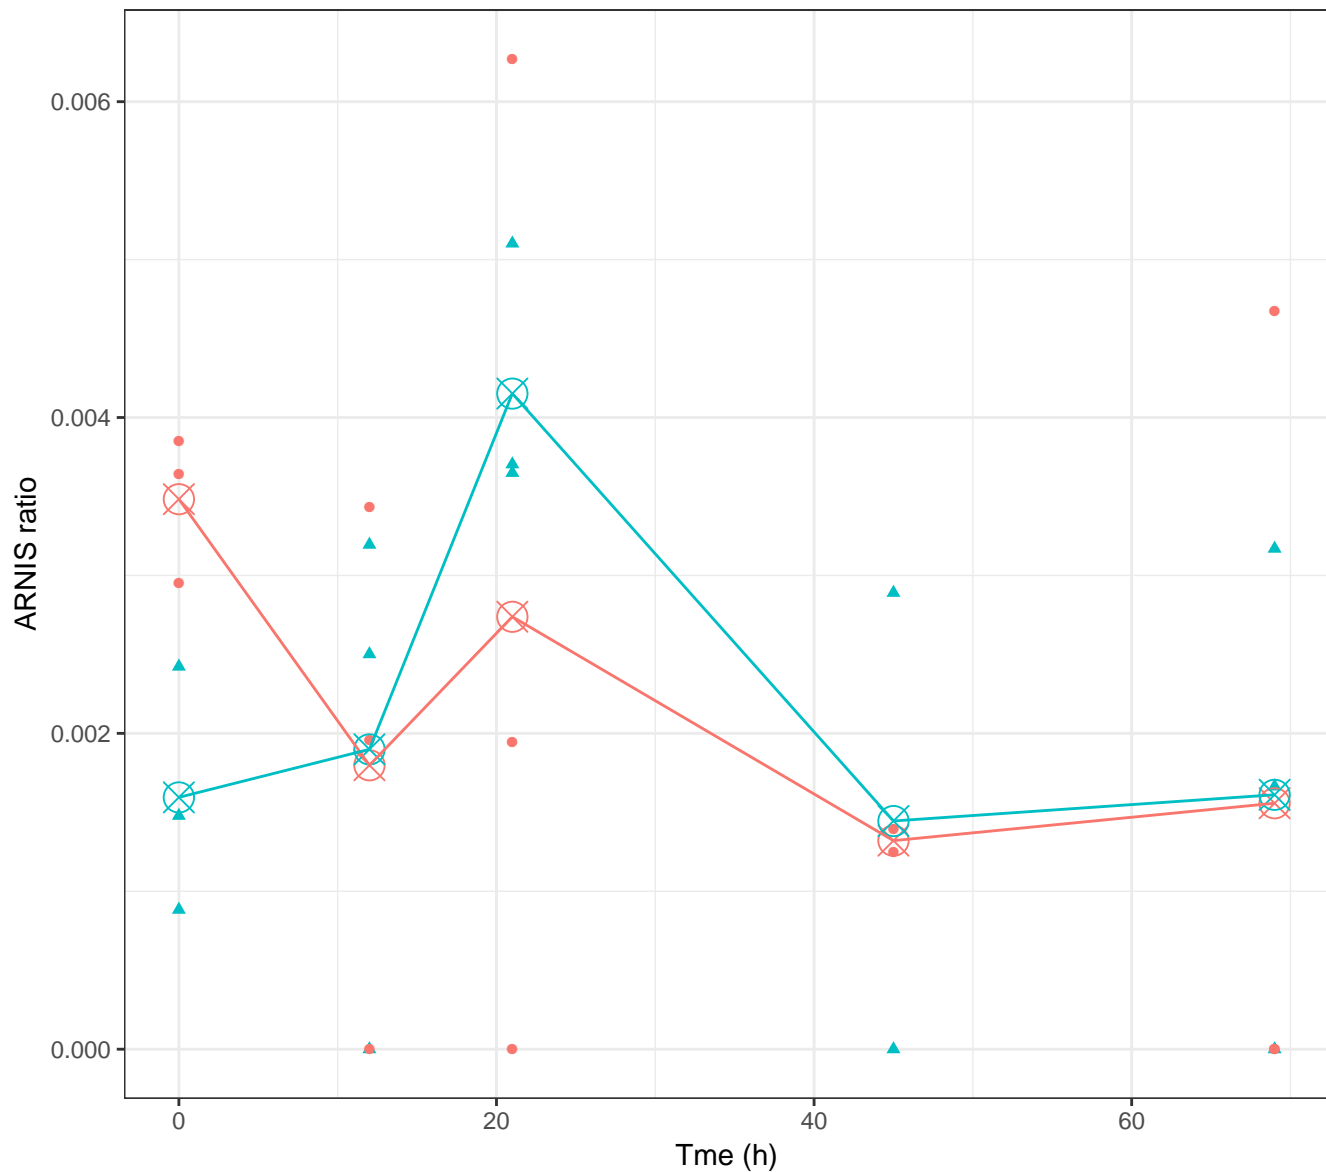

# OTU.900\_Deltaproteobacteria\_Sandaracinaceae

Treatment  Control  Filtered-1micron

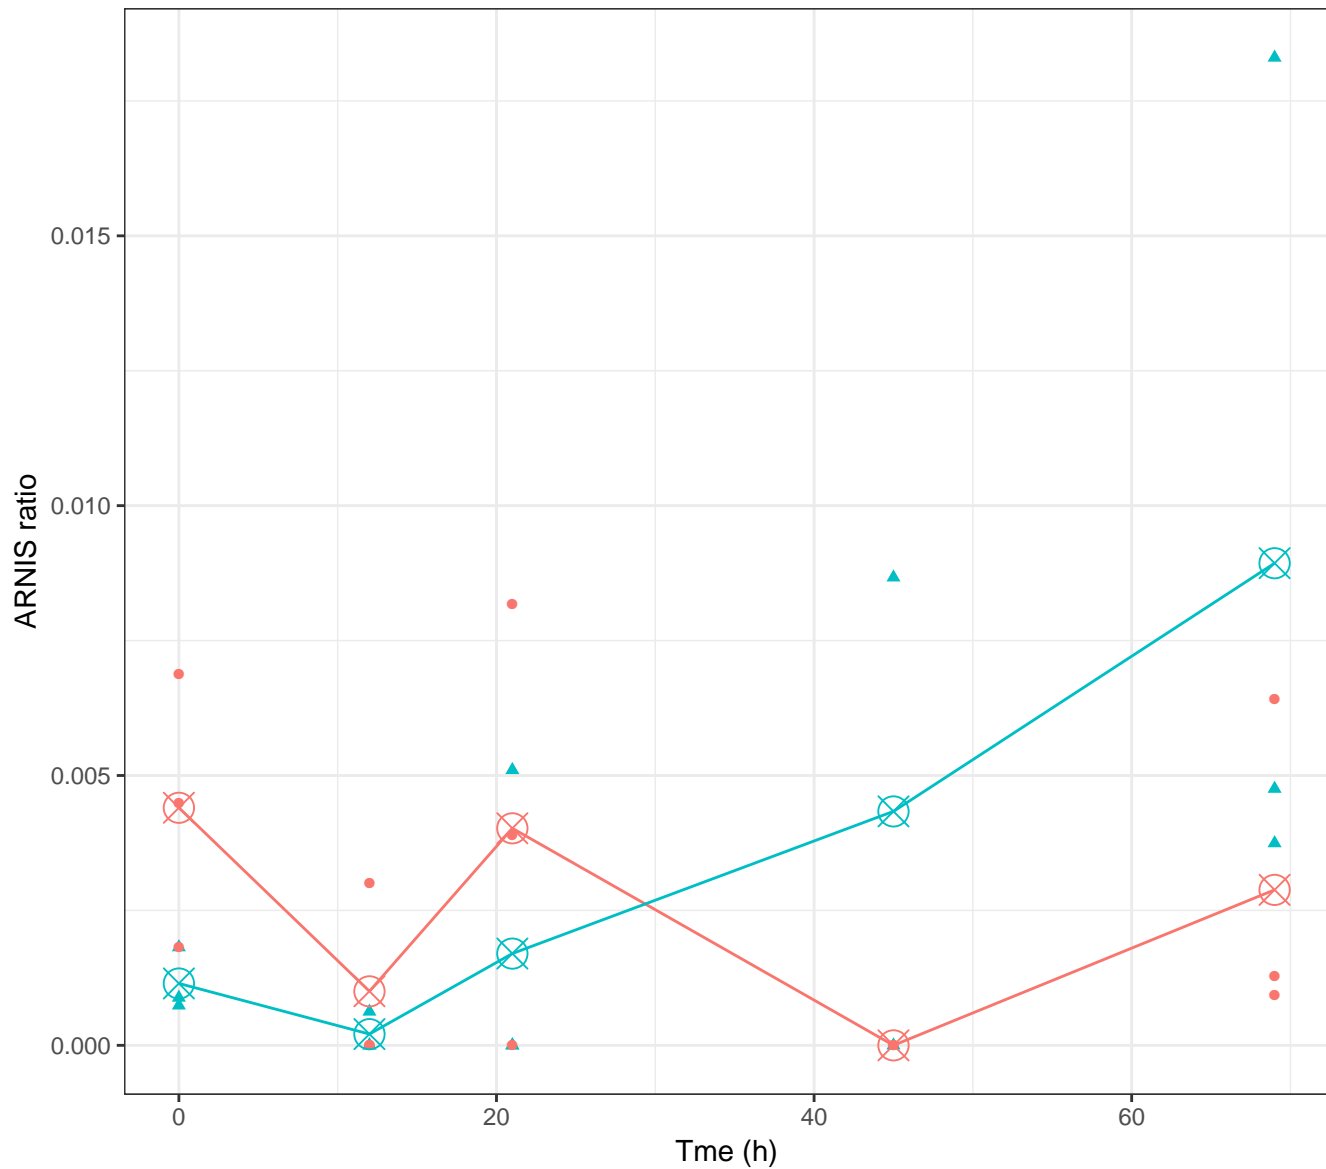

# OTU.3060\_Verrucomicrobia\_FukuN18\_freshwater\_group

Treatment Control Filtered-1micron

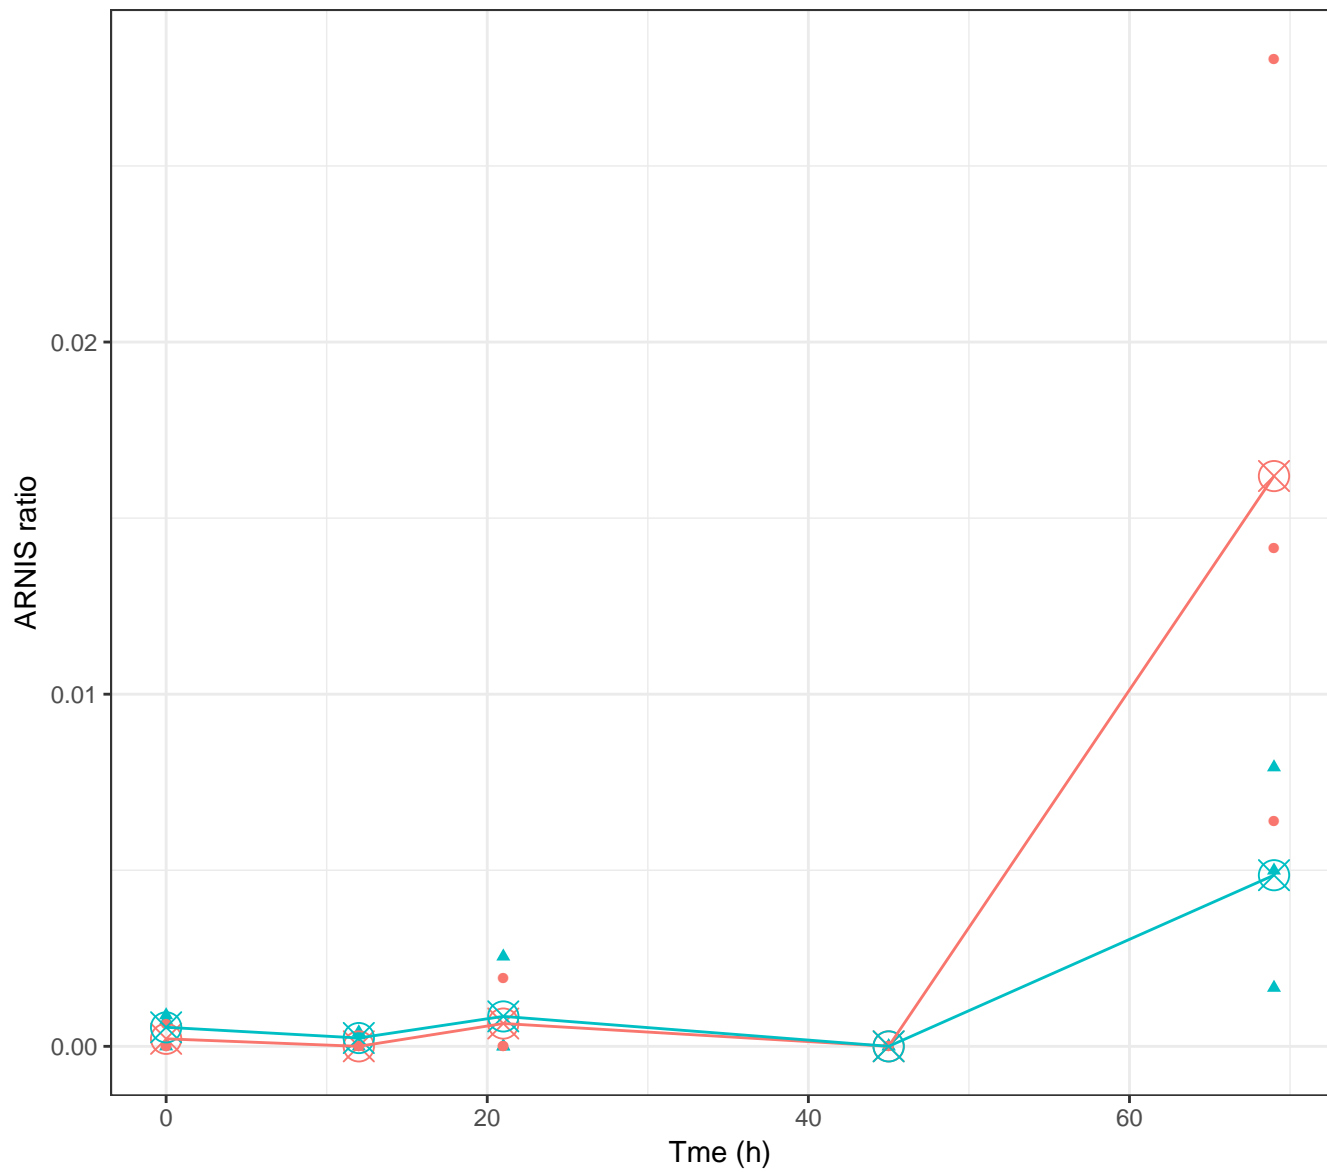

# OTU.5172\_Alphaproteobacteria\_Rhodobacter

Treatment Control Filtered-1micron

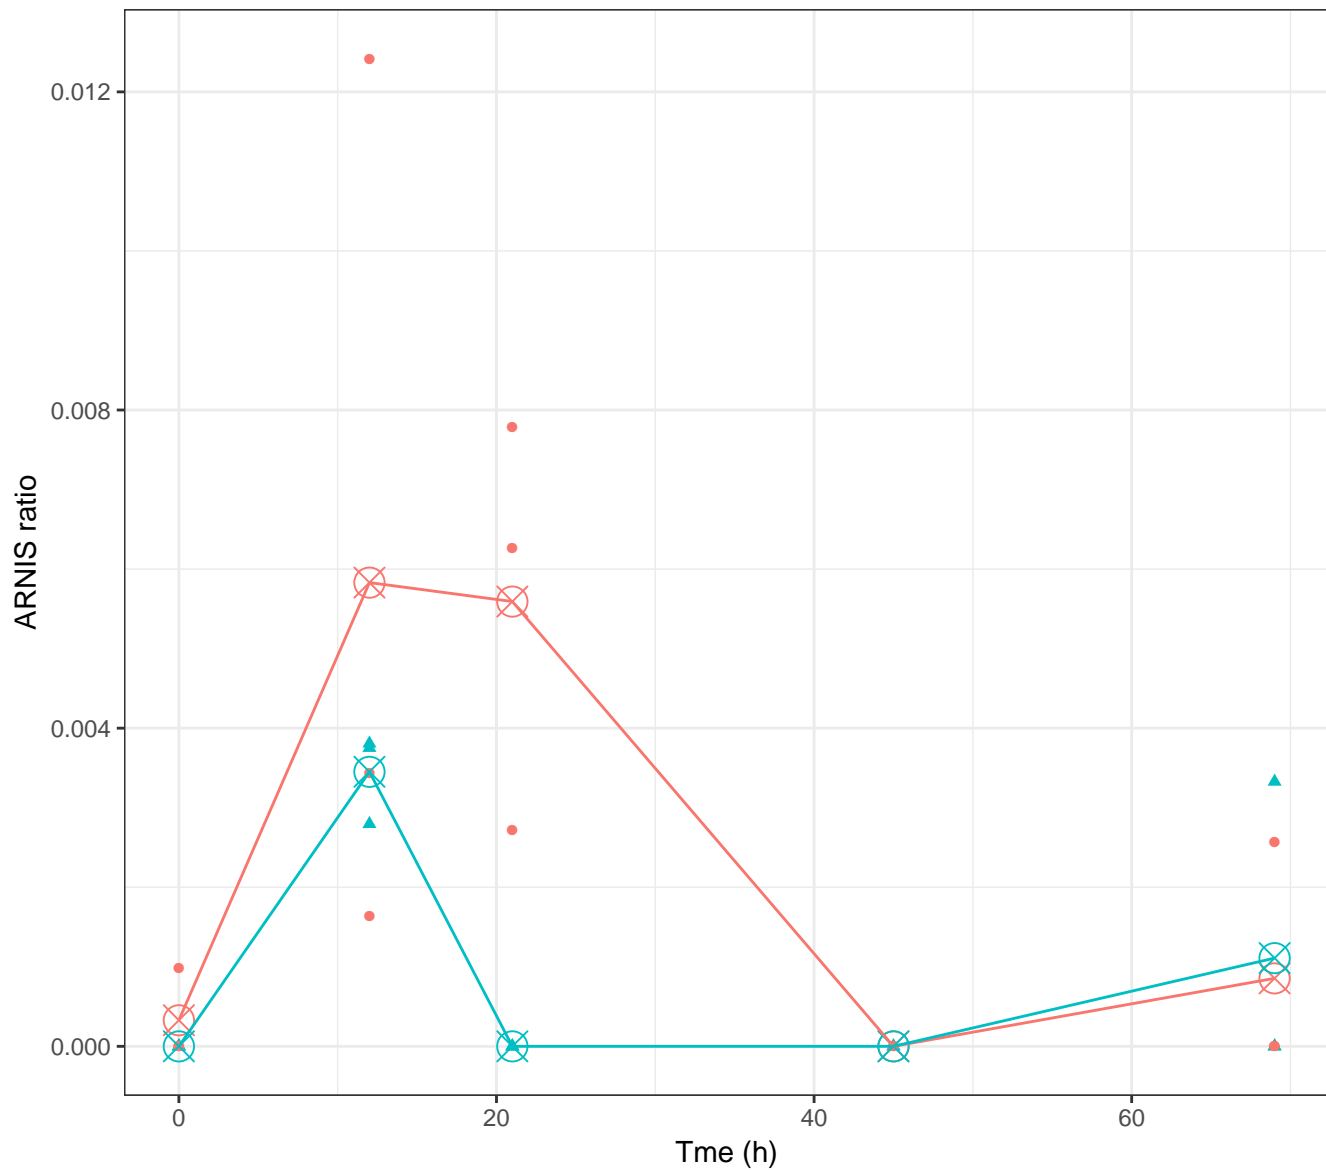

# OTU.199\_Betaproteobacteria\_Aquabacterium

Treatment Control Filtered-1micron

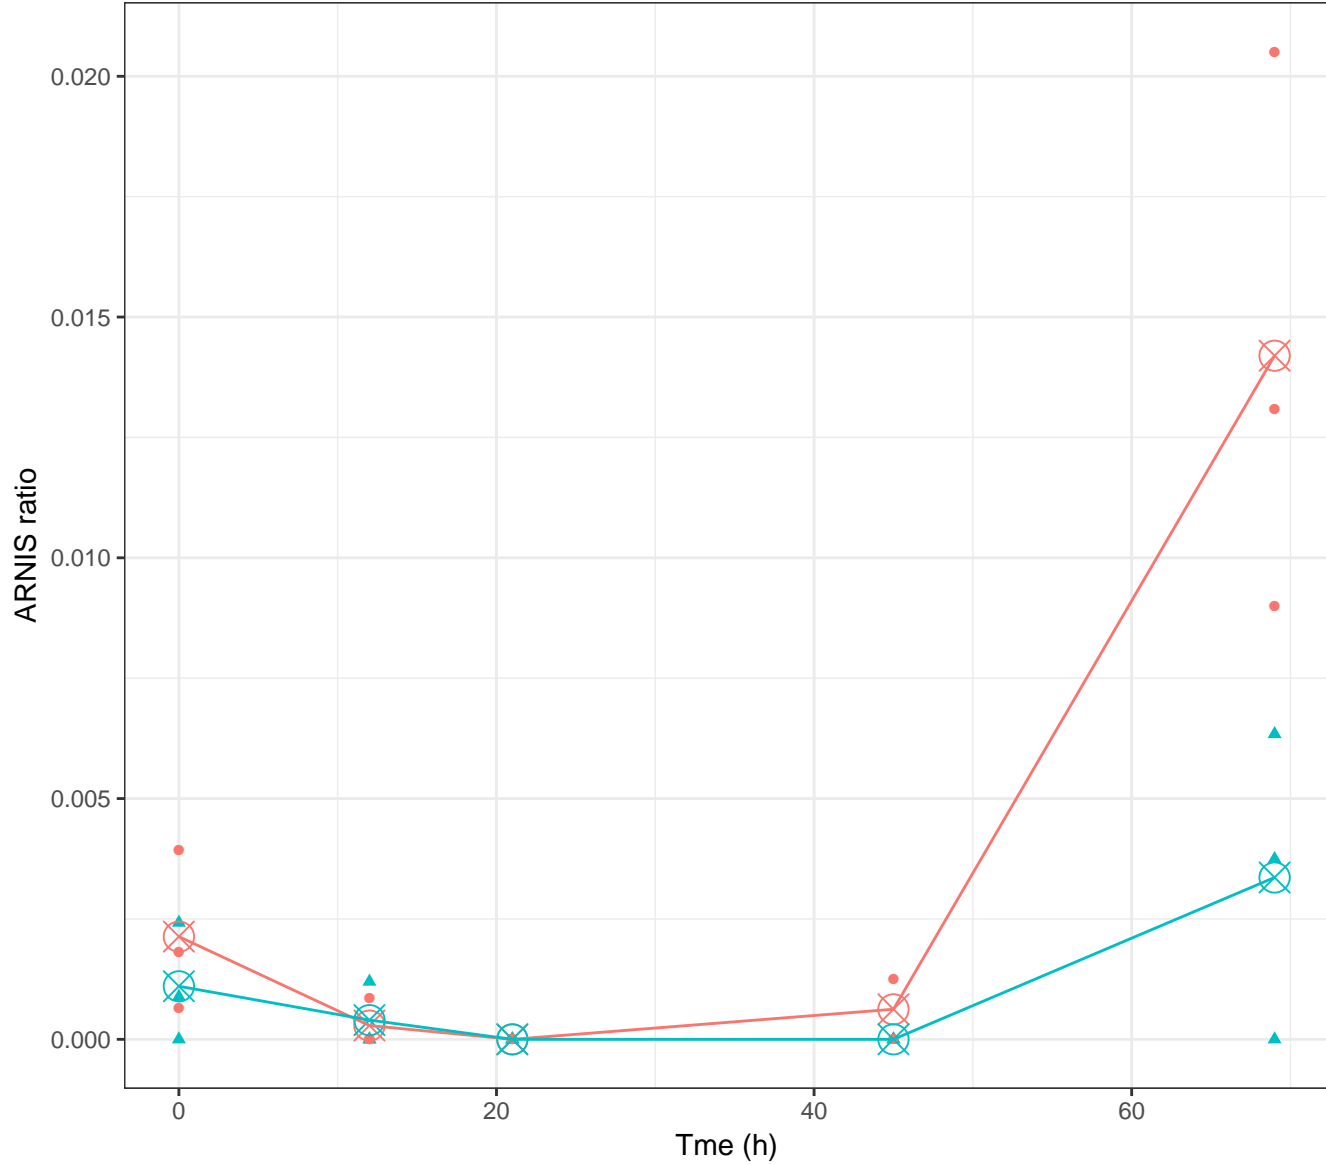

# OTU.3756\_Actinobacteria\_clade\_acl.A7

Treatment ⊗ Control ⊗ Filtered-1micron

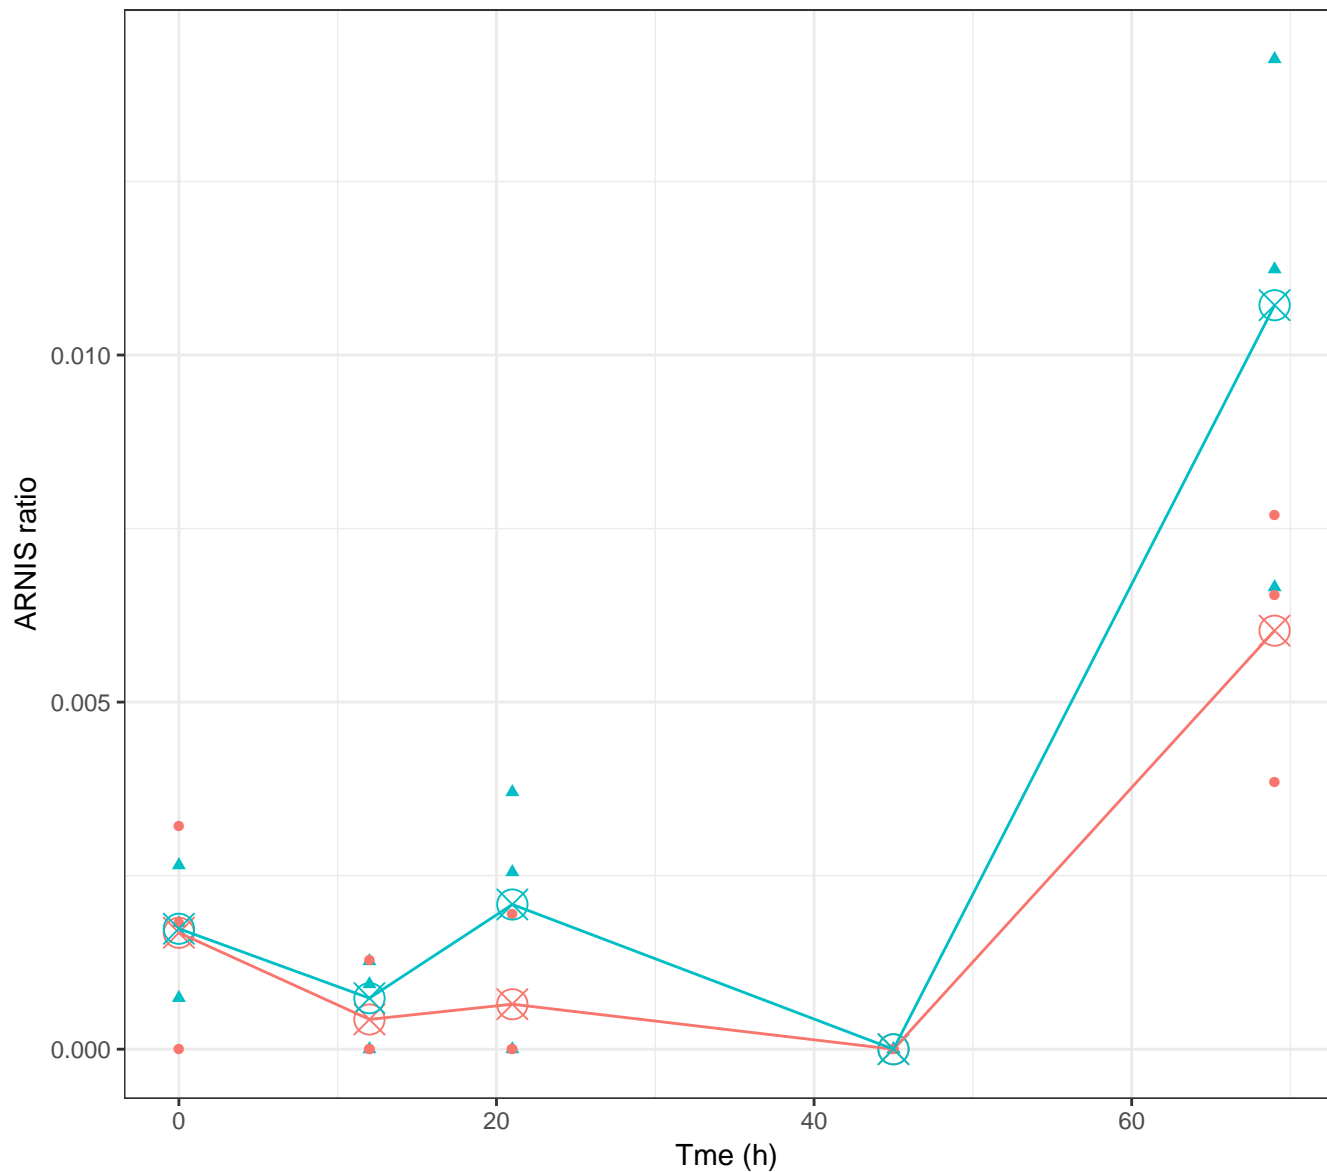

# OTU.1498\_Alphaproteobacteria\_Methylosinus

Treatment Control Filtered-1micron

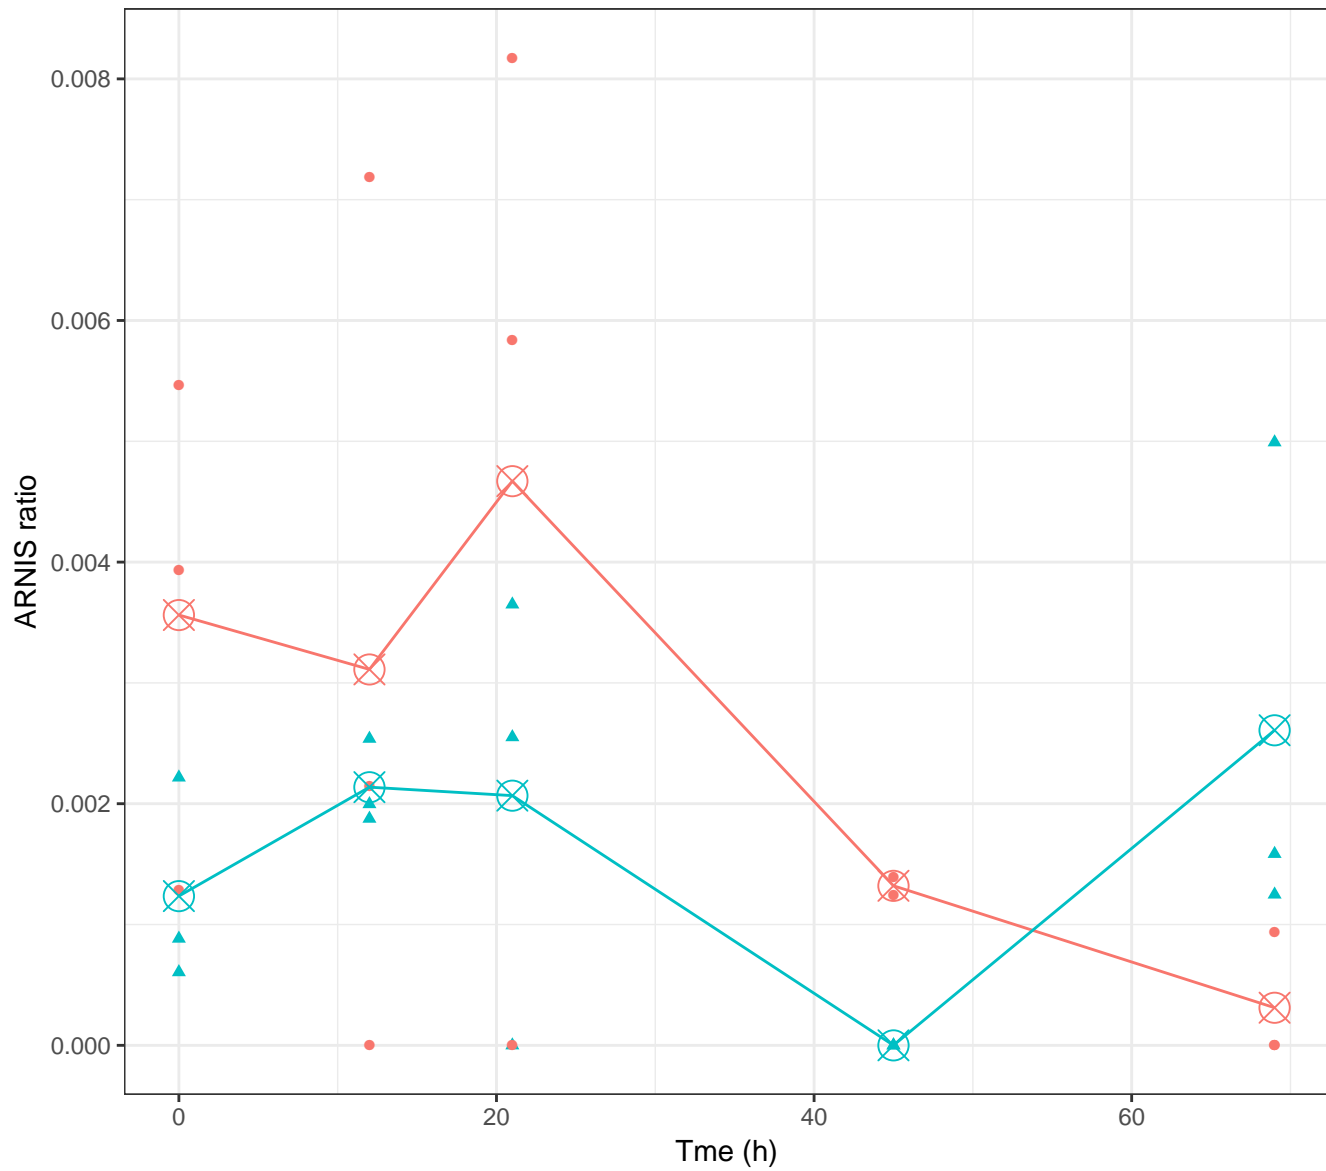



# OTU.268\_Actinobacteria\_clade\_acl.A6

Treatment ⊗ Control ⊗ Filtered-1micron

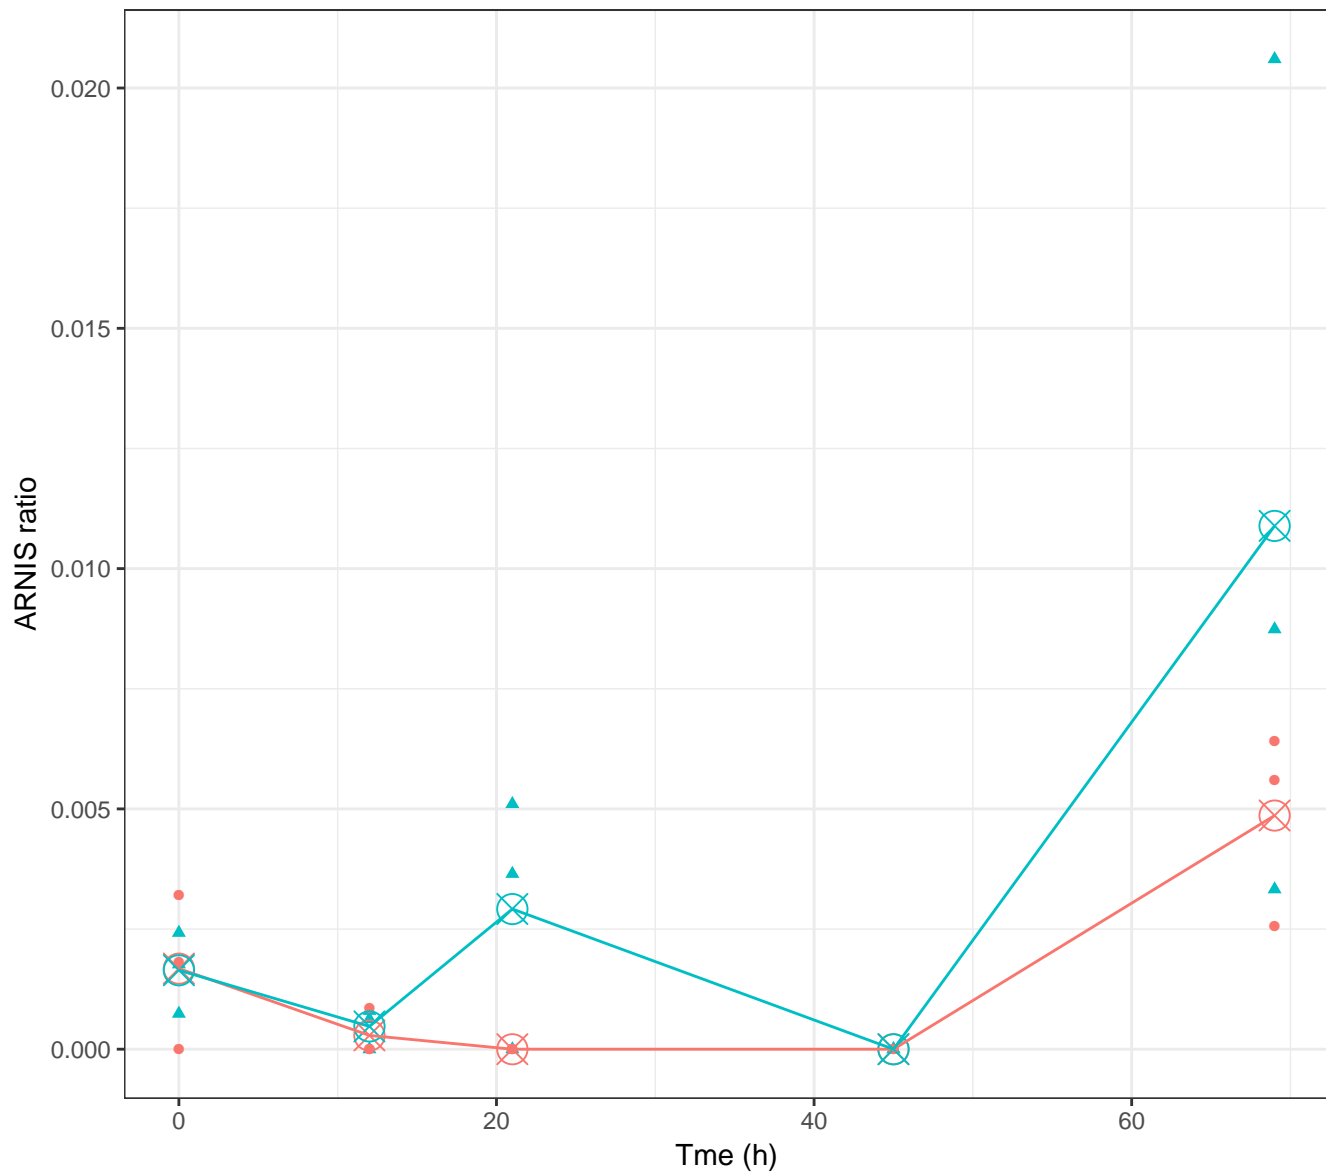

# OTU.535\_Actinobacteria\_Mycobacterium

Treatment ⊗ Control ⊗ Filtered-1micron

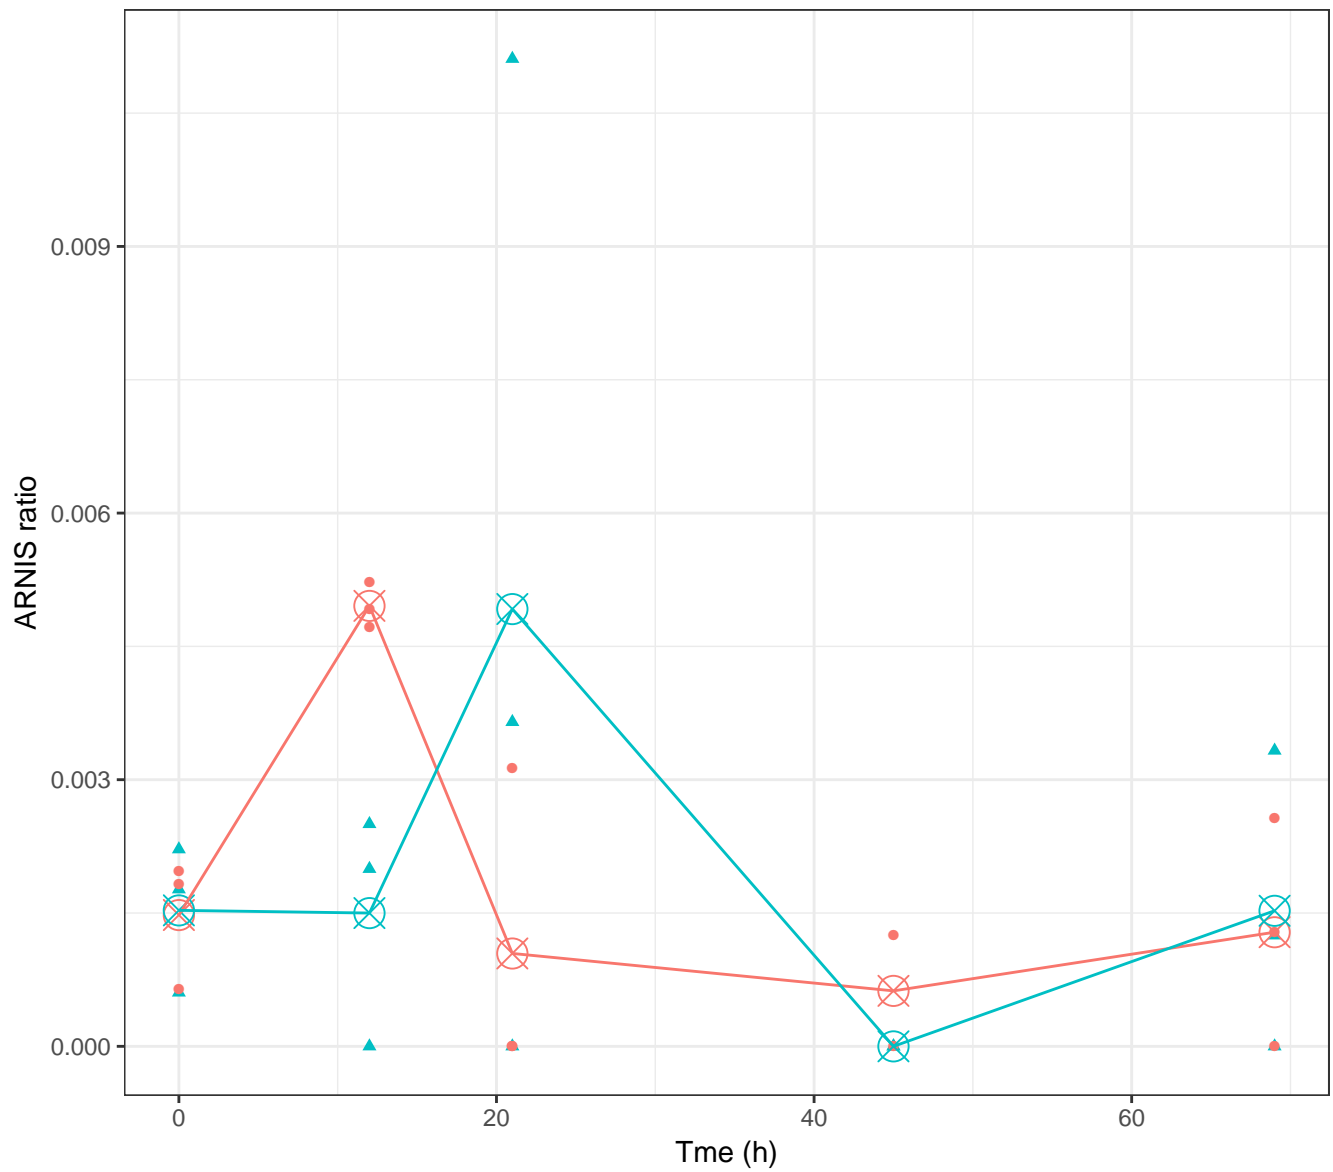

# OTU.1577\_Bacteroidetes\_Chitinophagaceae

Treatment ⊗ Control ⊗ Filtered-1micron

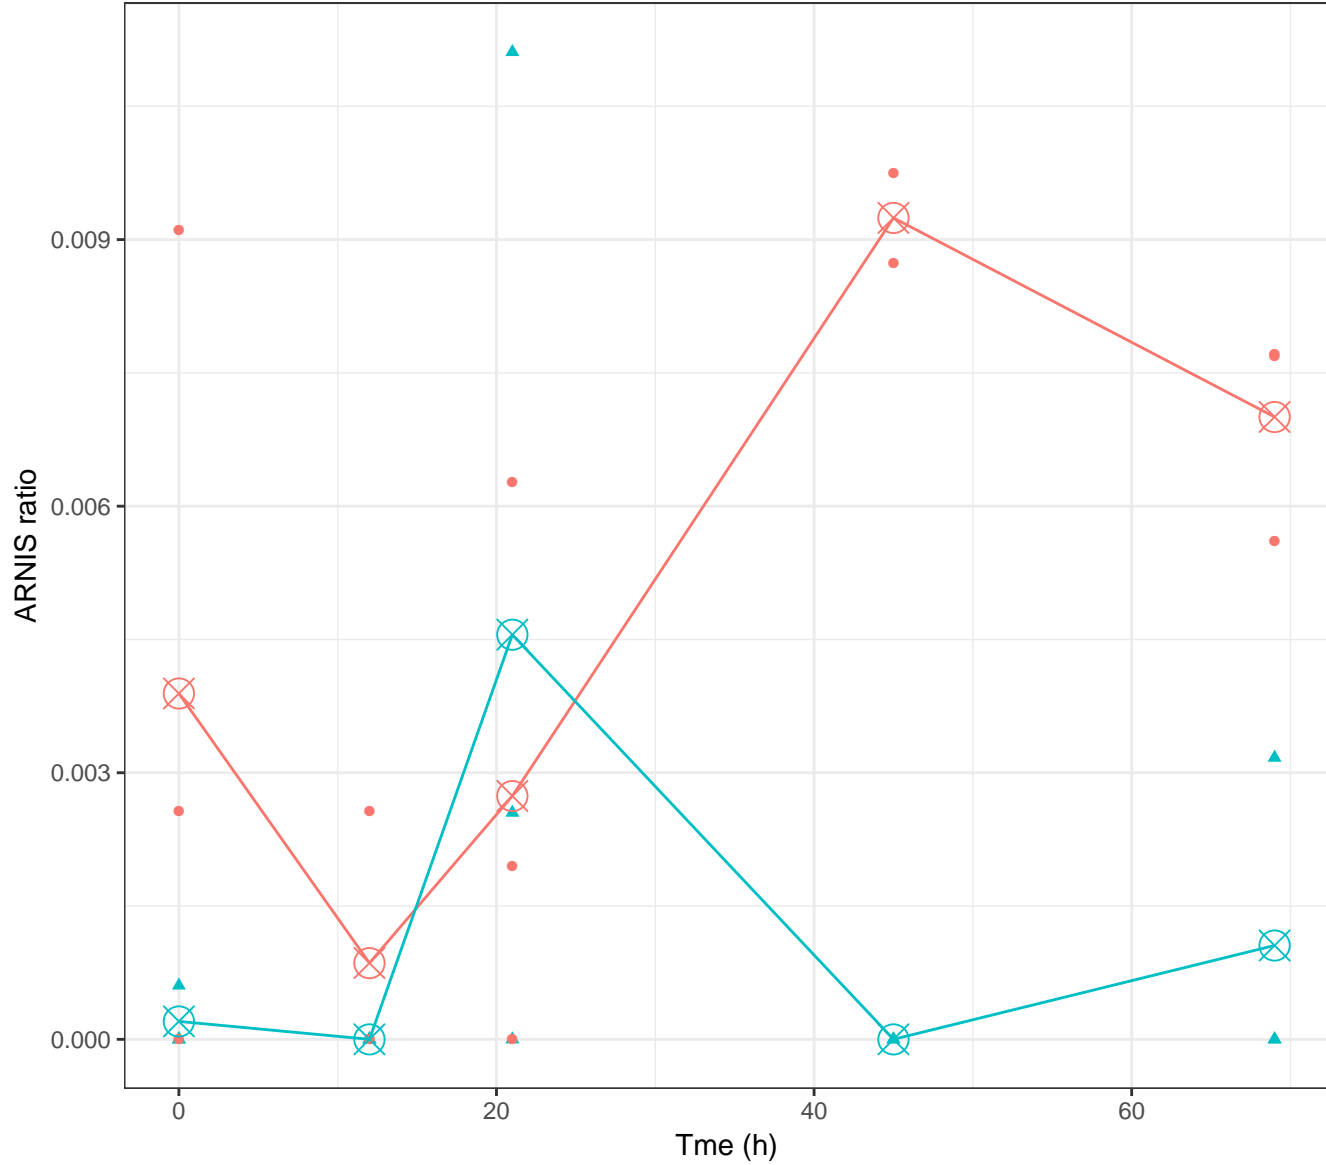

# OTU.1168\_Chloroflexi

Treatment ⊗ Control ⊗ Filtered-1micron

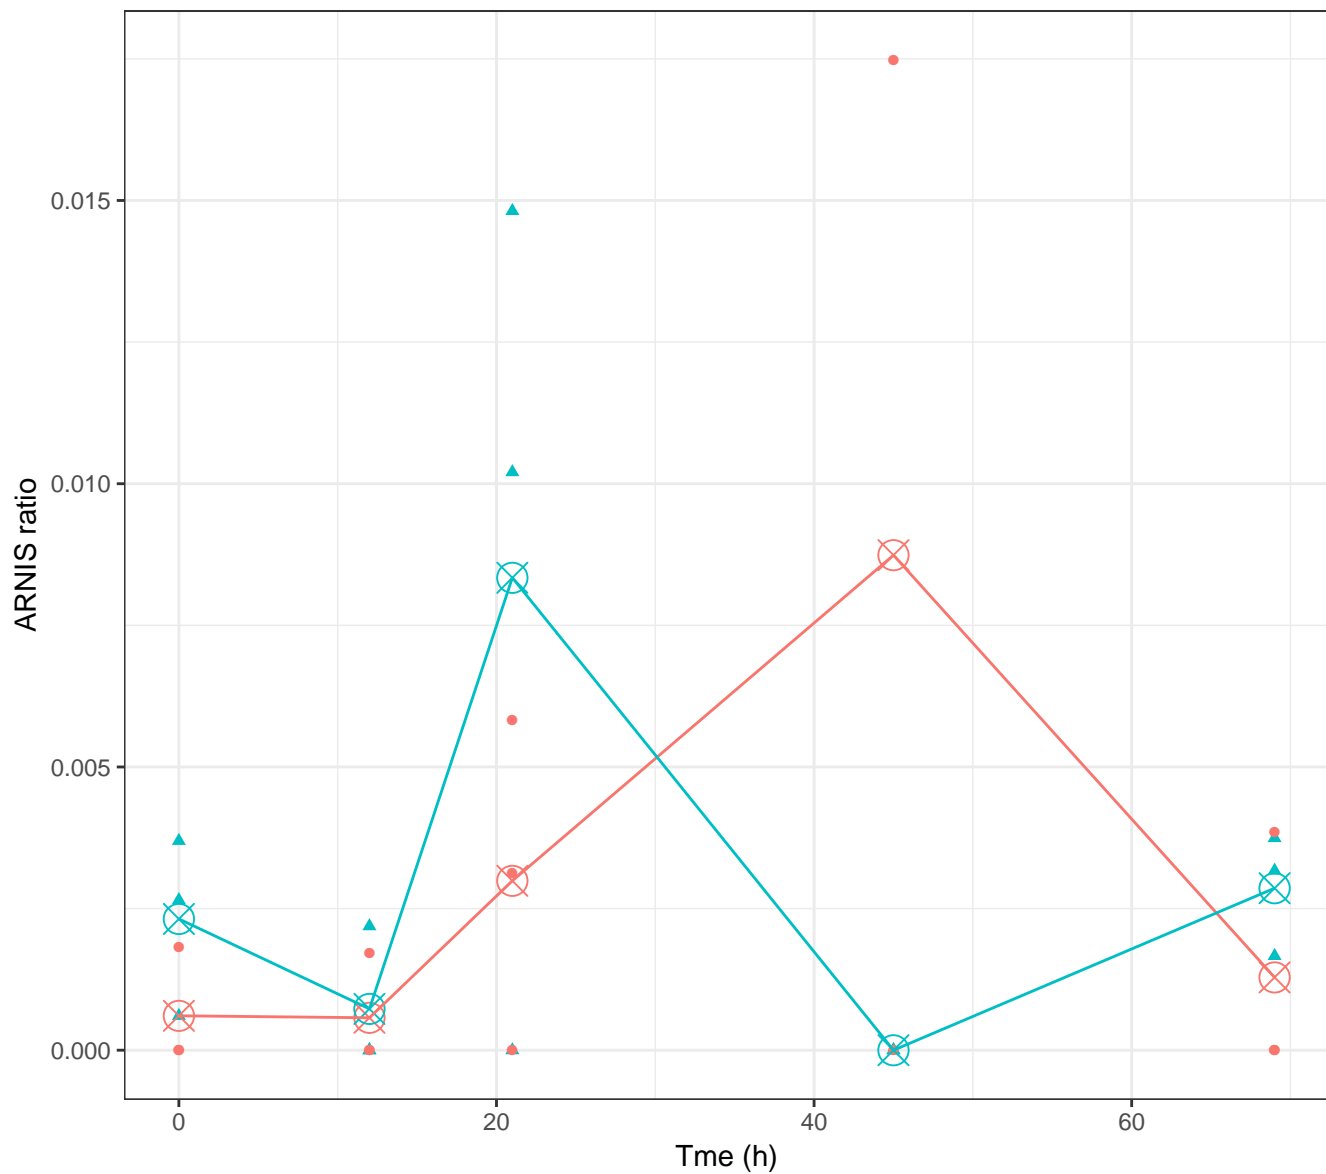

## OTU.189\_Bacteroidetes\_Emticicia

Treatment  Control  Filtered-1micron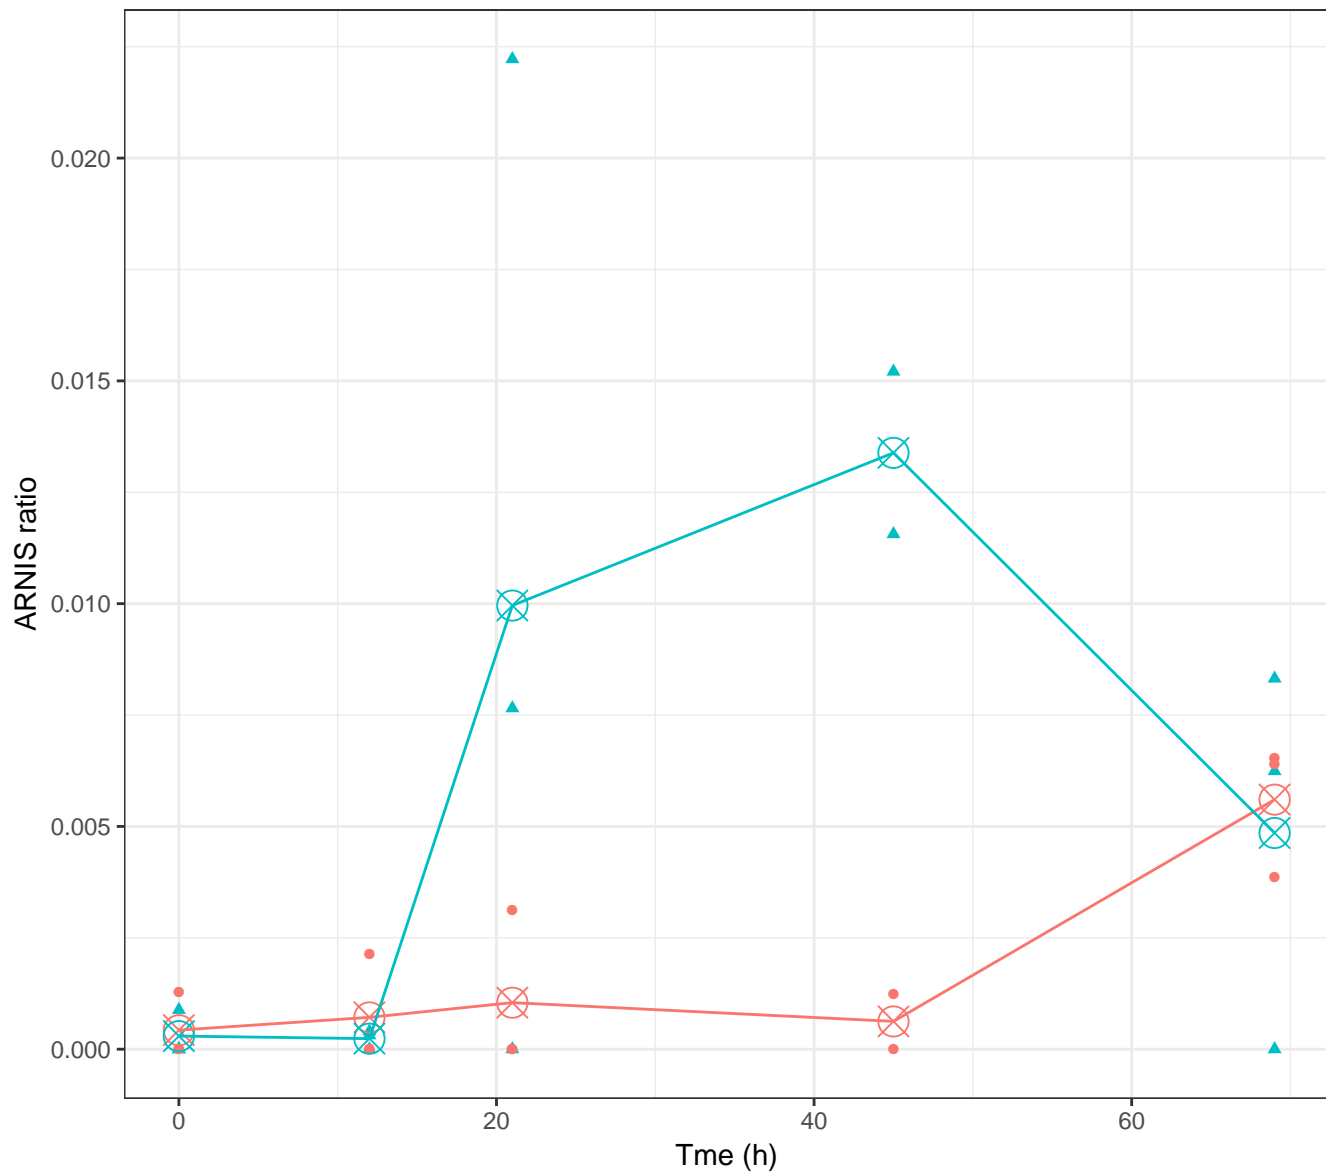

# OTU.79\_Actinobacteria\_CL500.29\_marine\_group\_freshwater\_clade\_acIV.B

Treatment ⊗ Control ⊗ Filtered-1micron

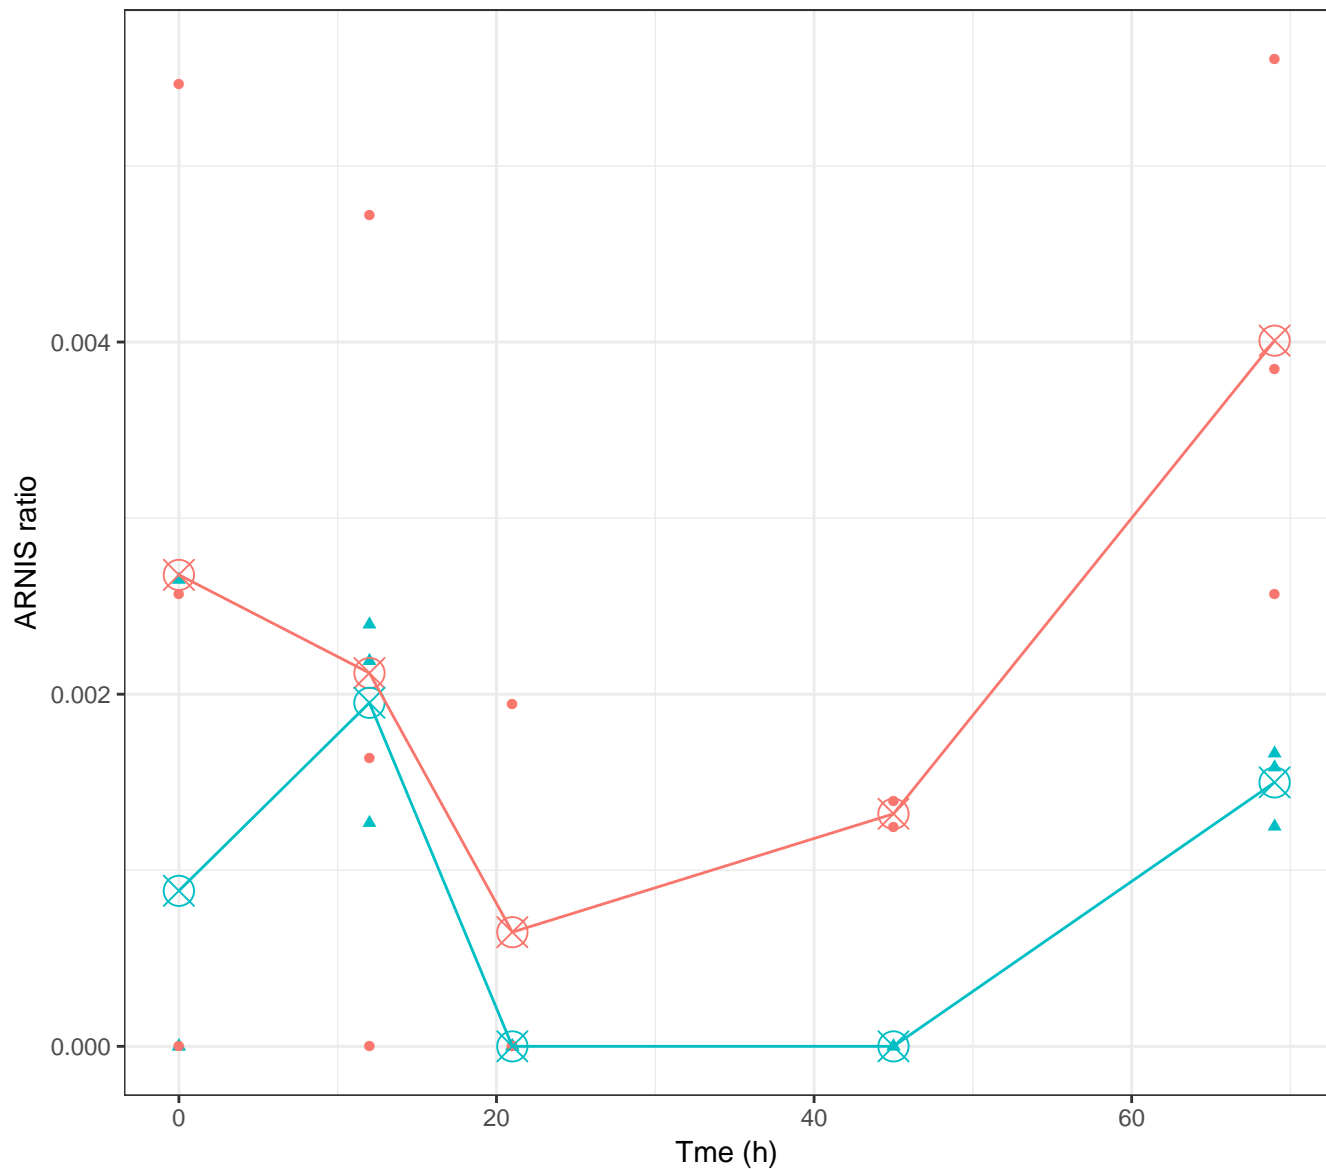

# OTU.1059\_Armatimonadetes

Treatment ⊗ Control ⊗ Filtered-1micron

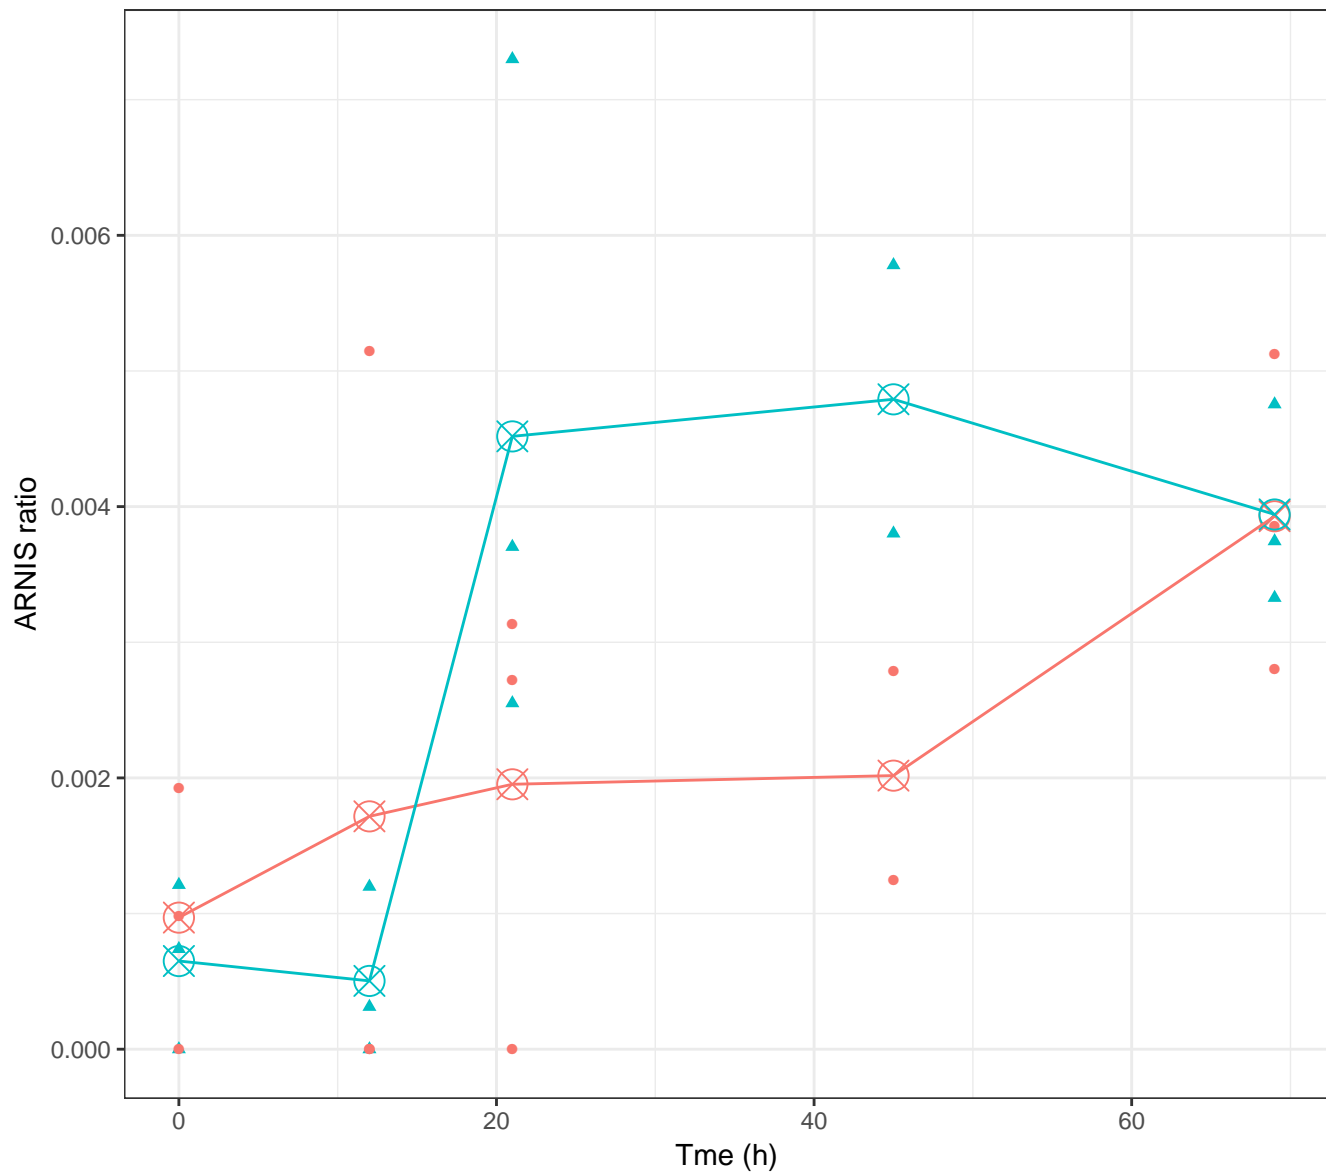

# OTU.288\_Alphaproteobacteria\_Meganema

Treatment ⊗ Control ⊗ Filtered-1micron

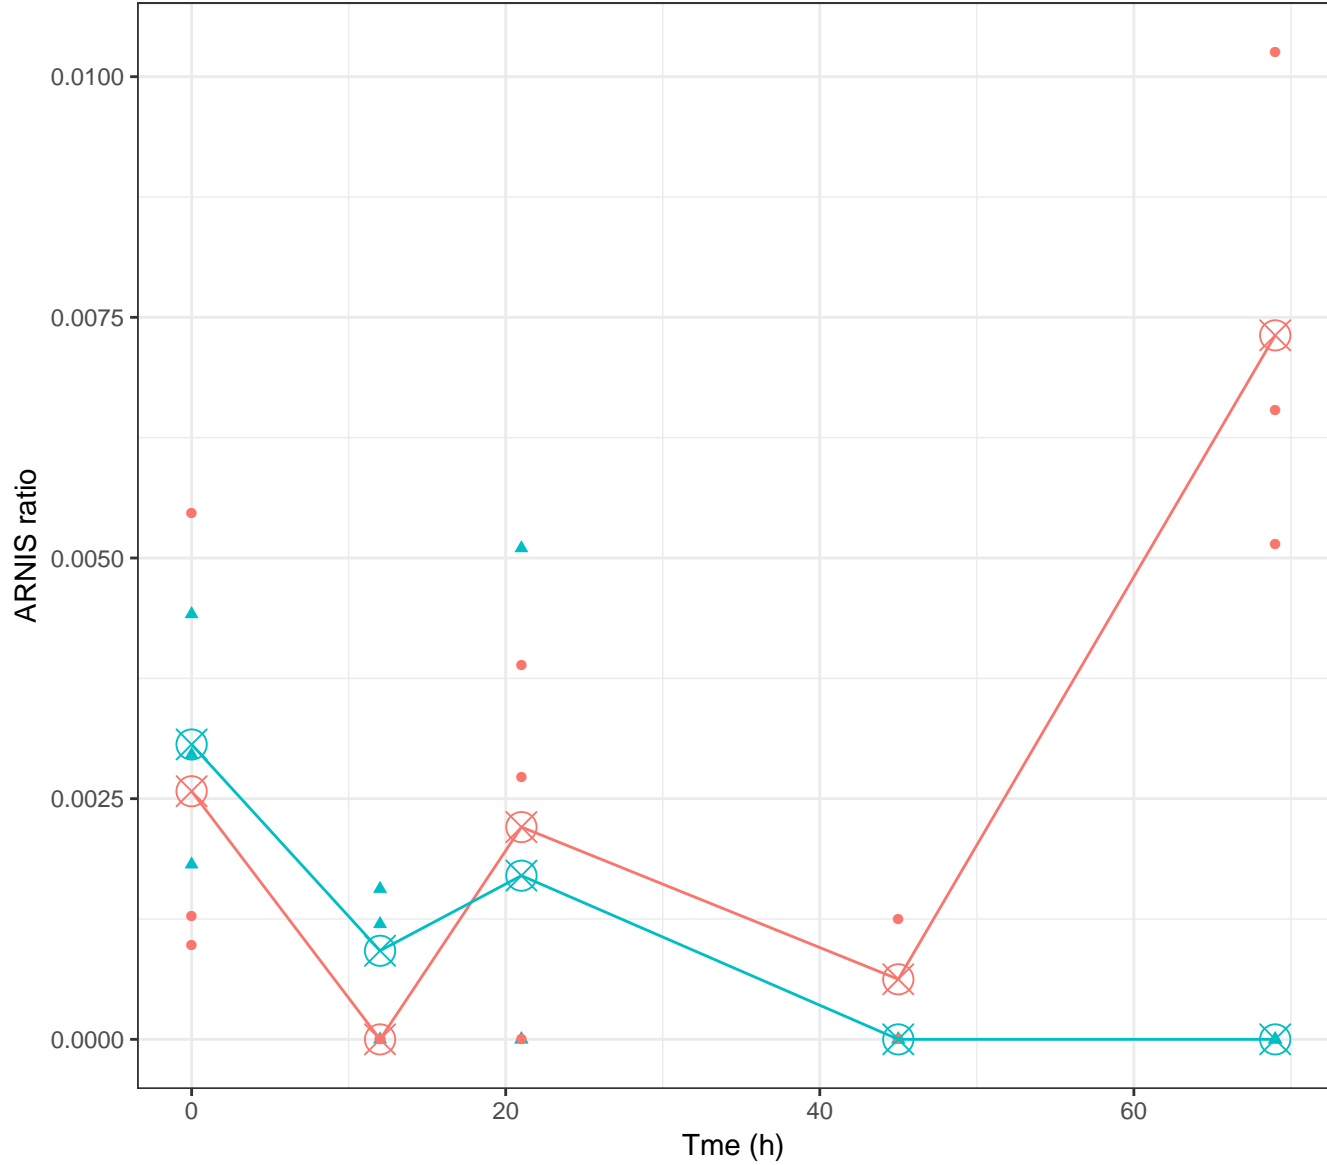



## OTU.144\_Bacteroidetes\_Sphingobacteriia\_LiUU.11.161

Treatment Control Filtered-1micron

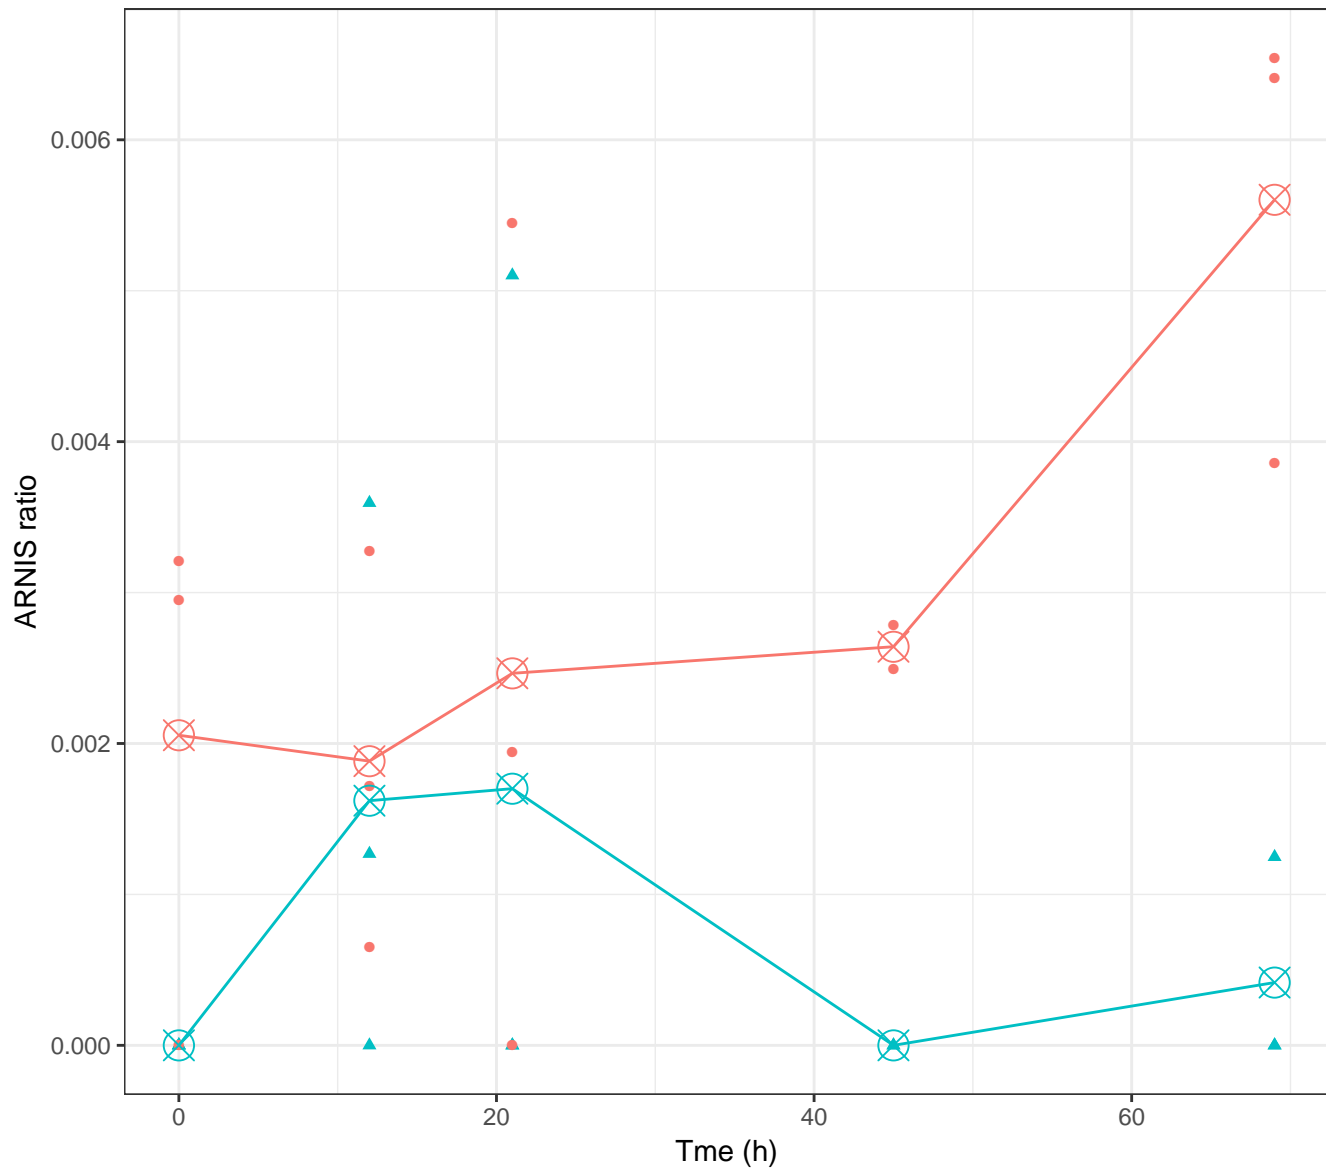

# OTU.3698\_Actinobacteria\_clade\_acl.A1

Treatment Control Filtered-1micron

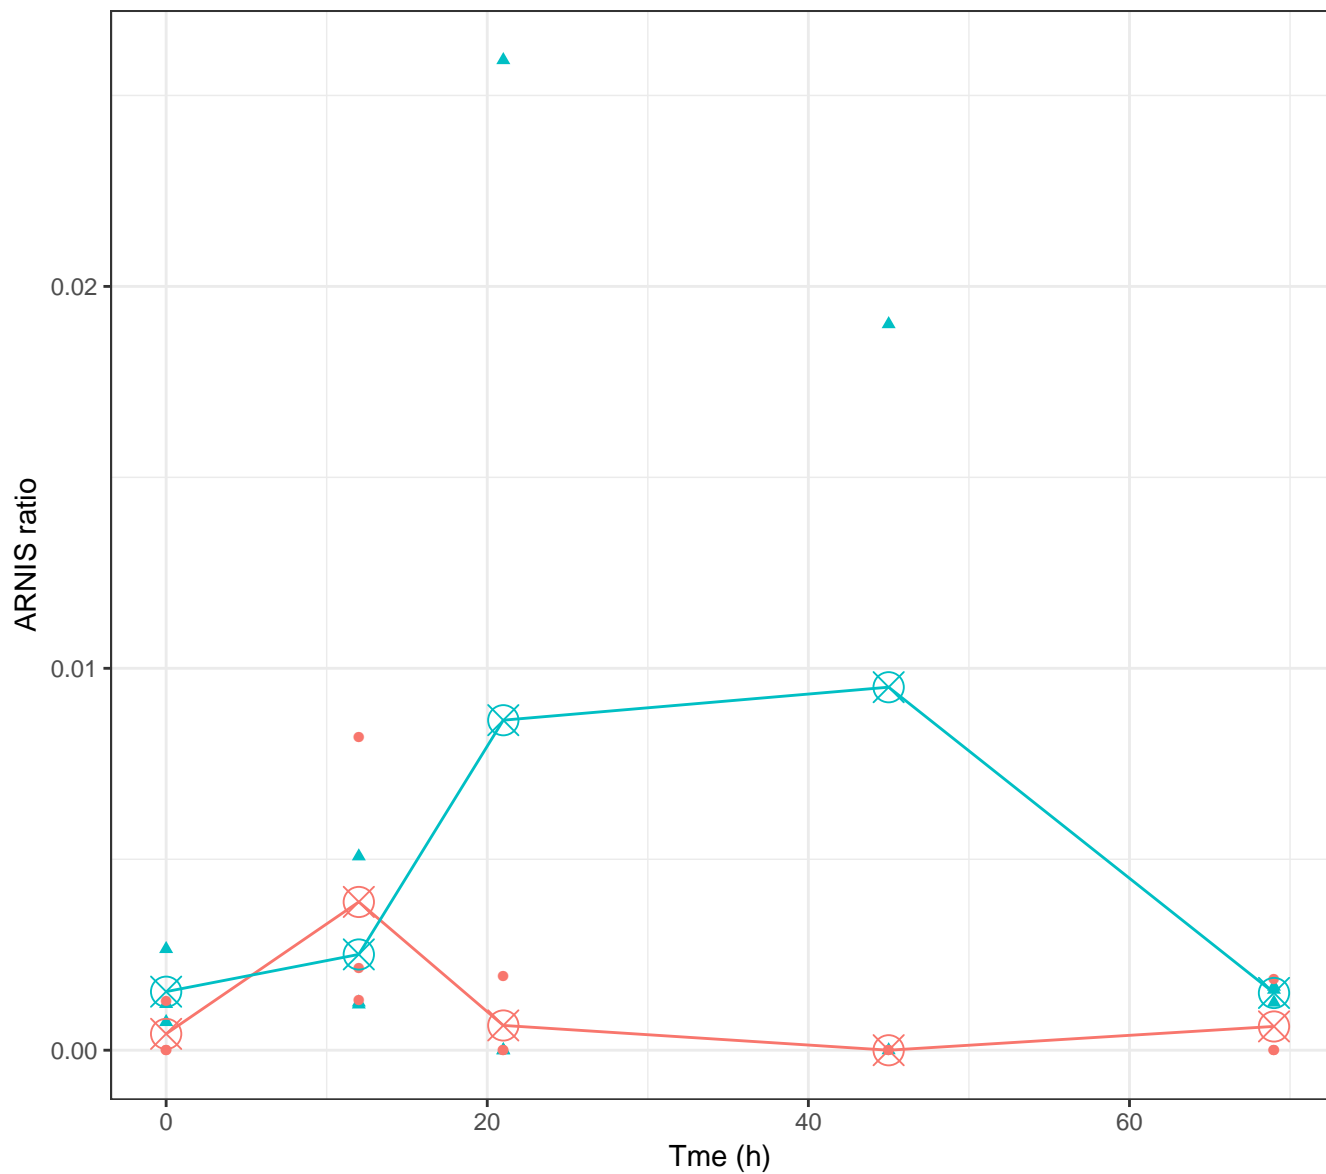

## OTU.305\_Actinobacteria\_clade\_acl.B2.4

Treatment Control Filtered-1micron

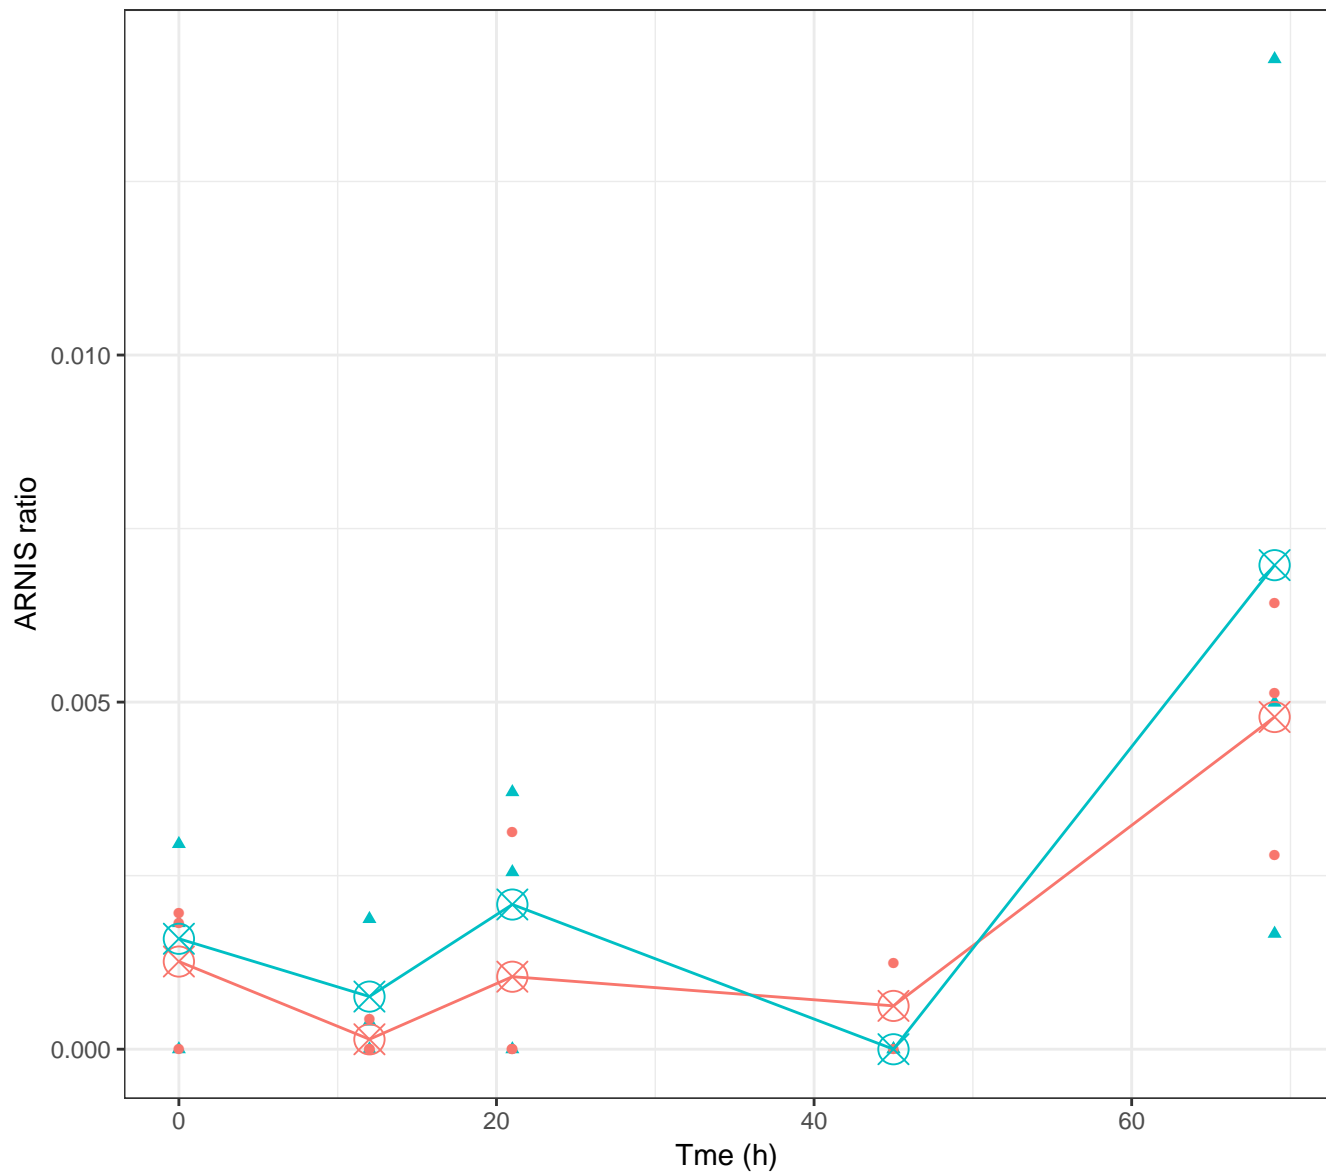

# OTU.978\_Alphaproteobacteria\_Novosphingobium

Treatment ⊗ Control ⊗ Filtered-1micron

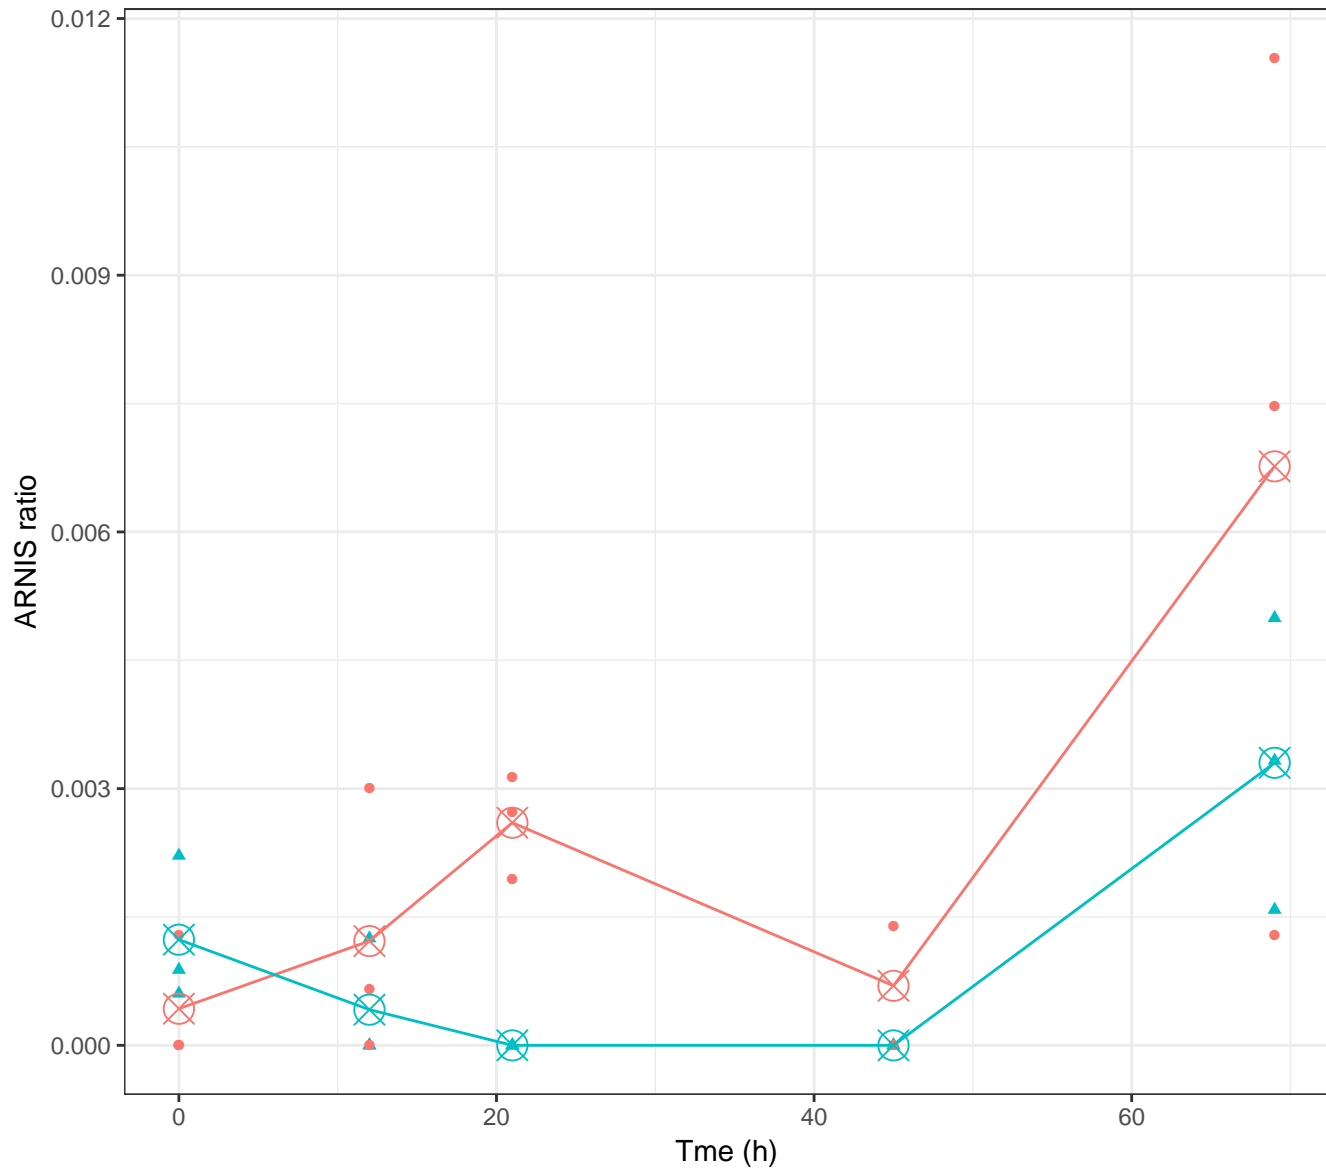

# OTU.2951\_Betaproteobacteria\_Variovorax

Treatment Control Filtered-1micron

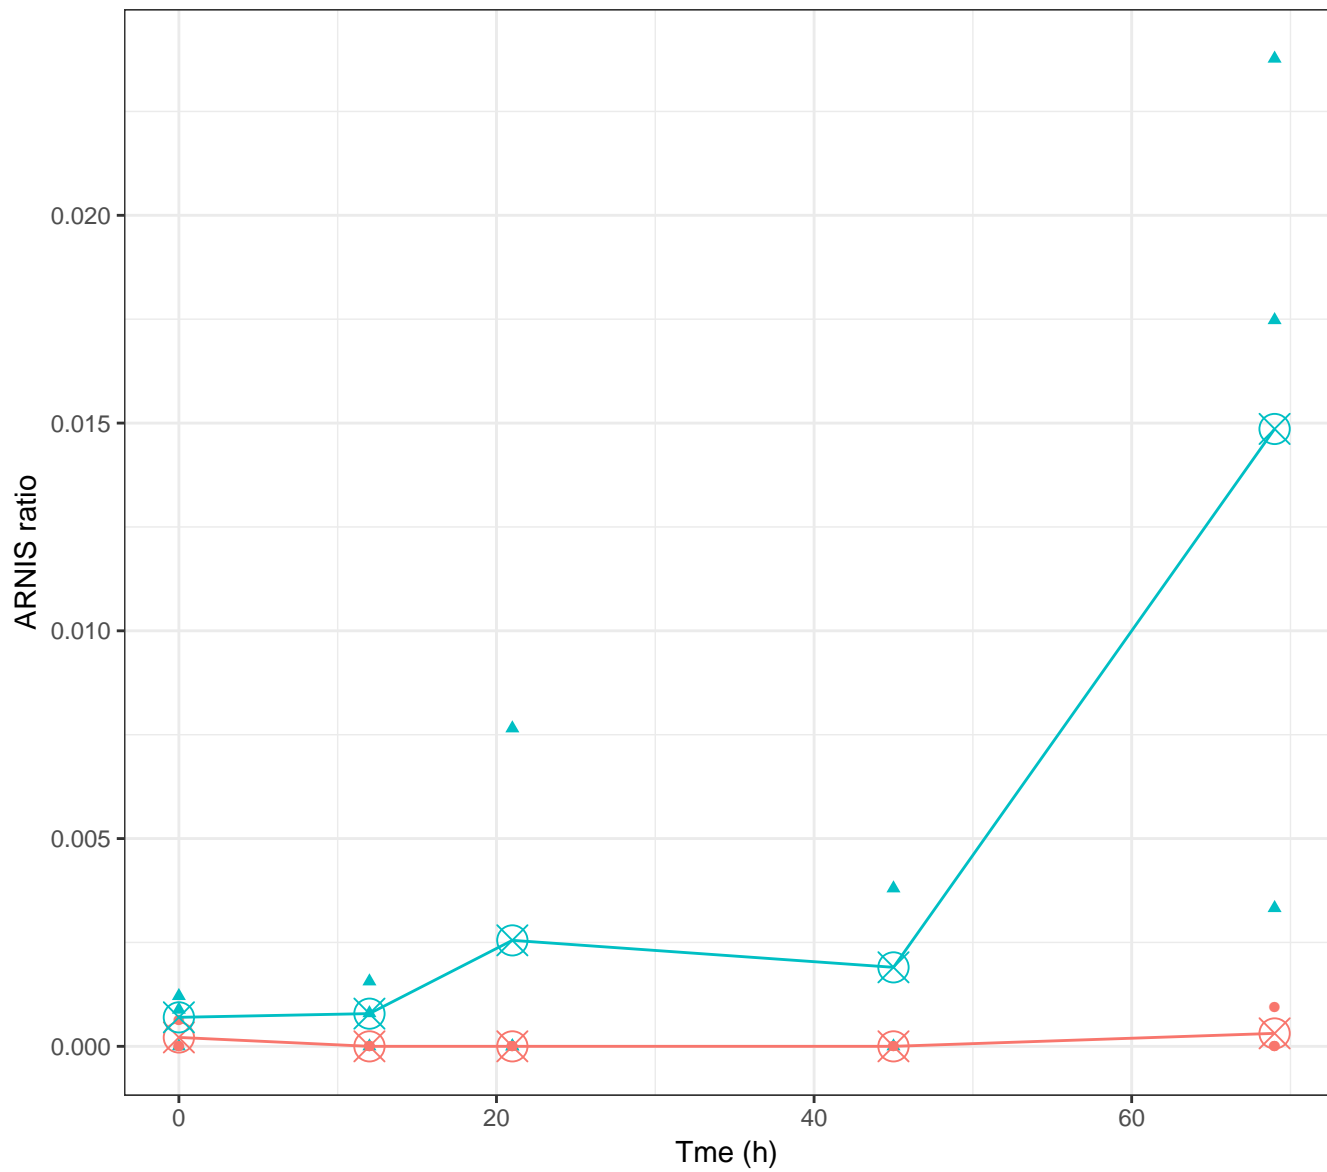

# OTU.2639\_Betaproteobacteria\_Polynucleobacter

Treatment ⊗ Control ⊗ Filtered-1micron

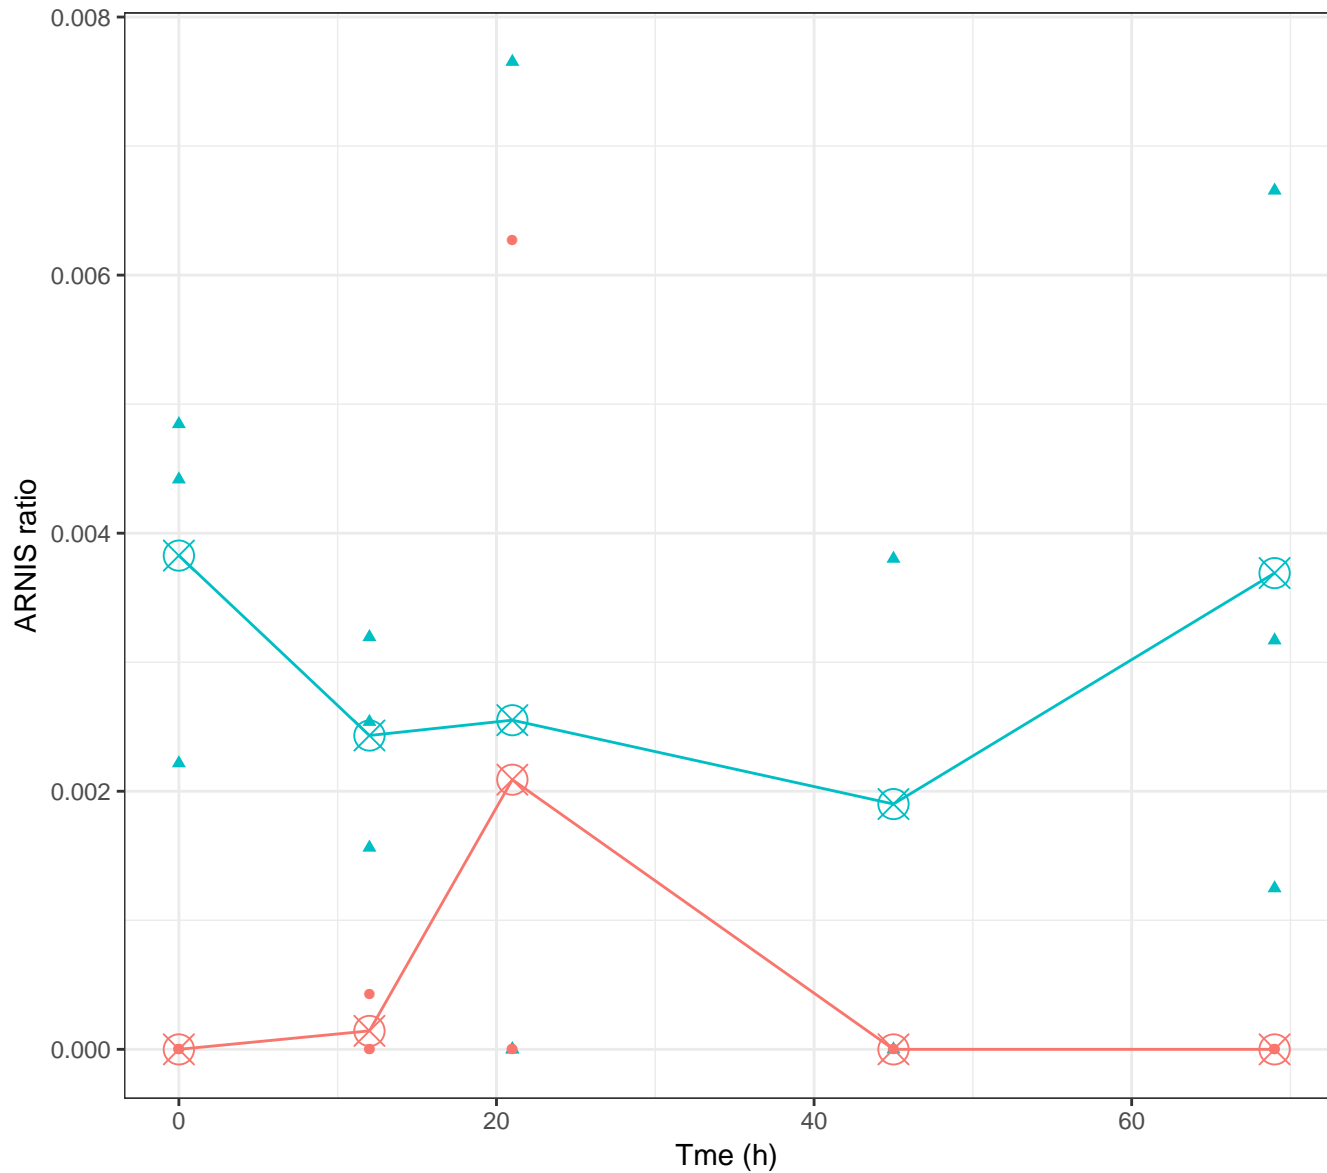

## OTU.591\_Betaproteobacteria\_Methylopumilus\_planktonicus\_LD28

Treatment  Control  Filtered-1micron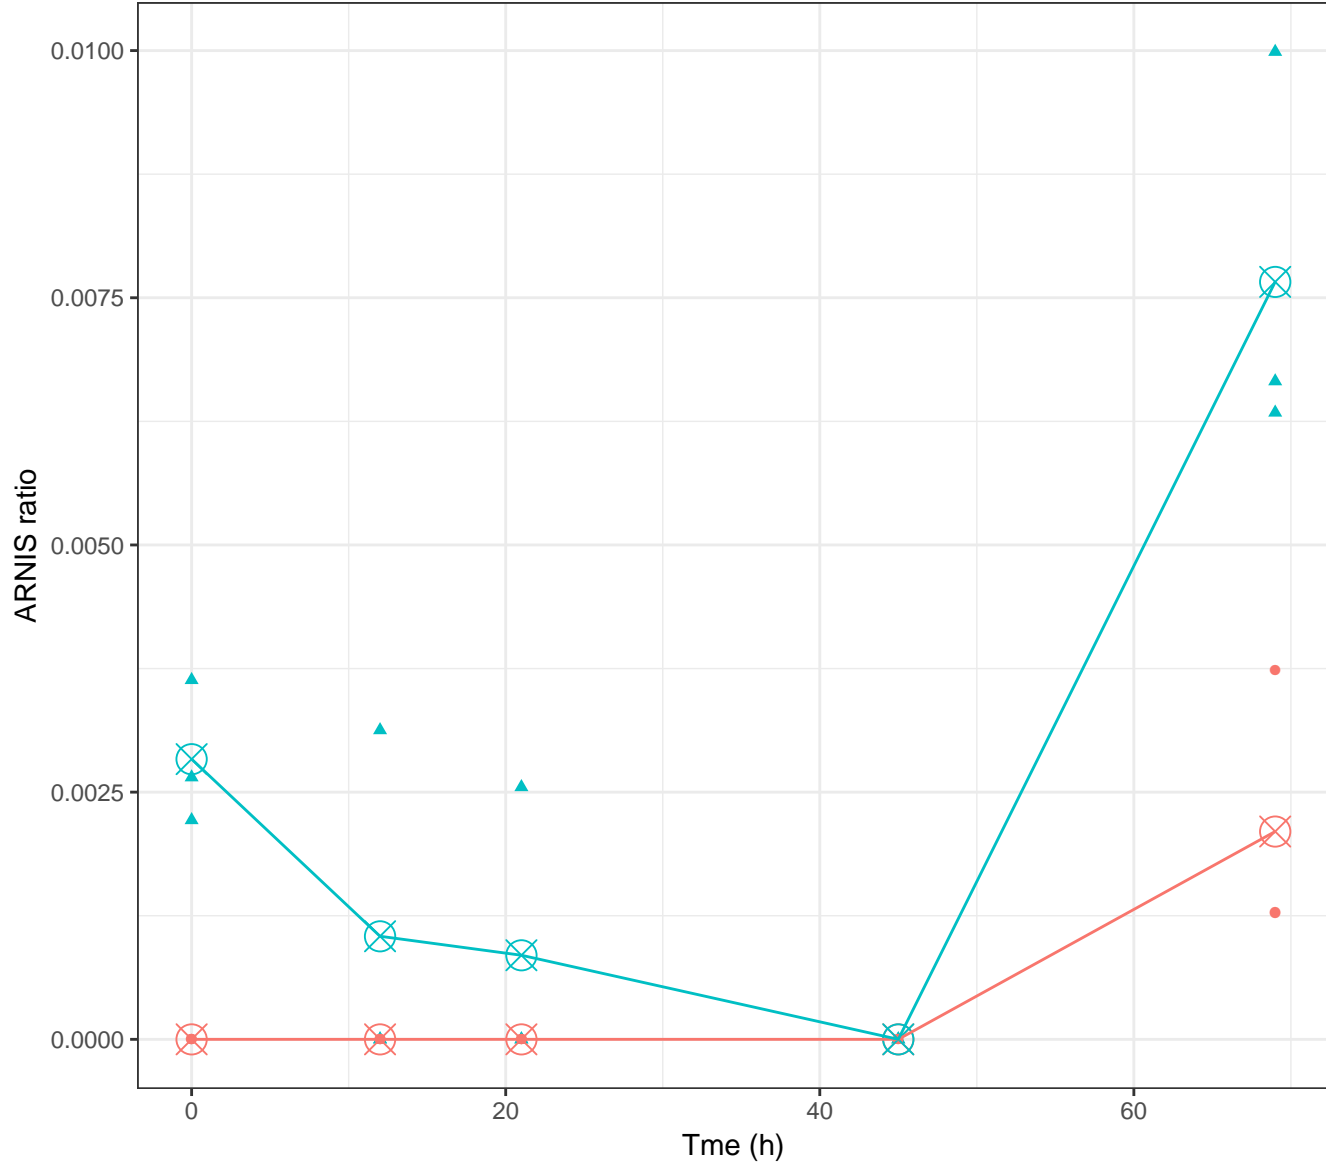

## OTU.755\_Actinobacteria\_clade\_acVII

Treatment  Control  Filtered-1micron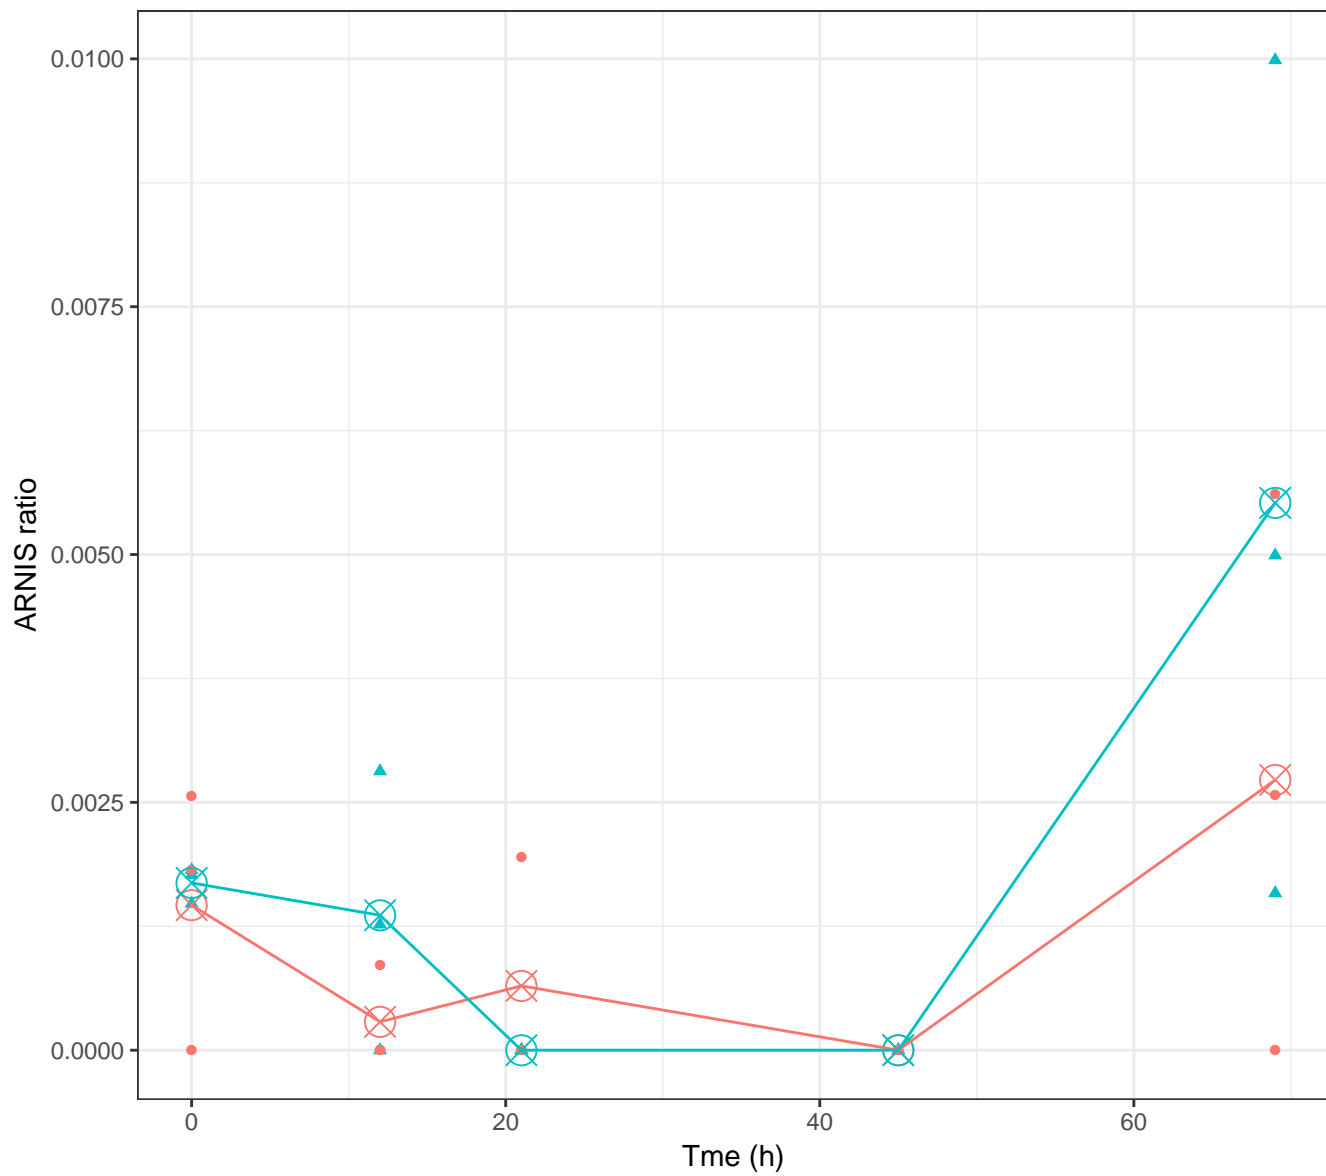



# OTU.279\_Actinobacteria\_Gaiellales

Treatment ⊗ Control ⊗ Filtered-1micron

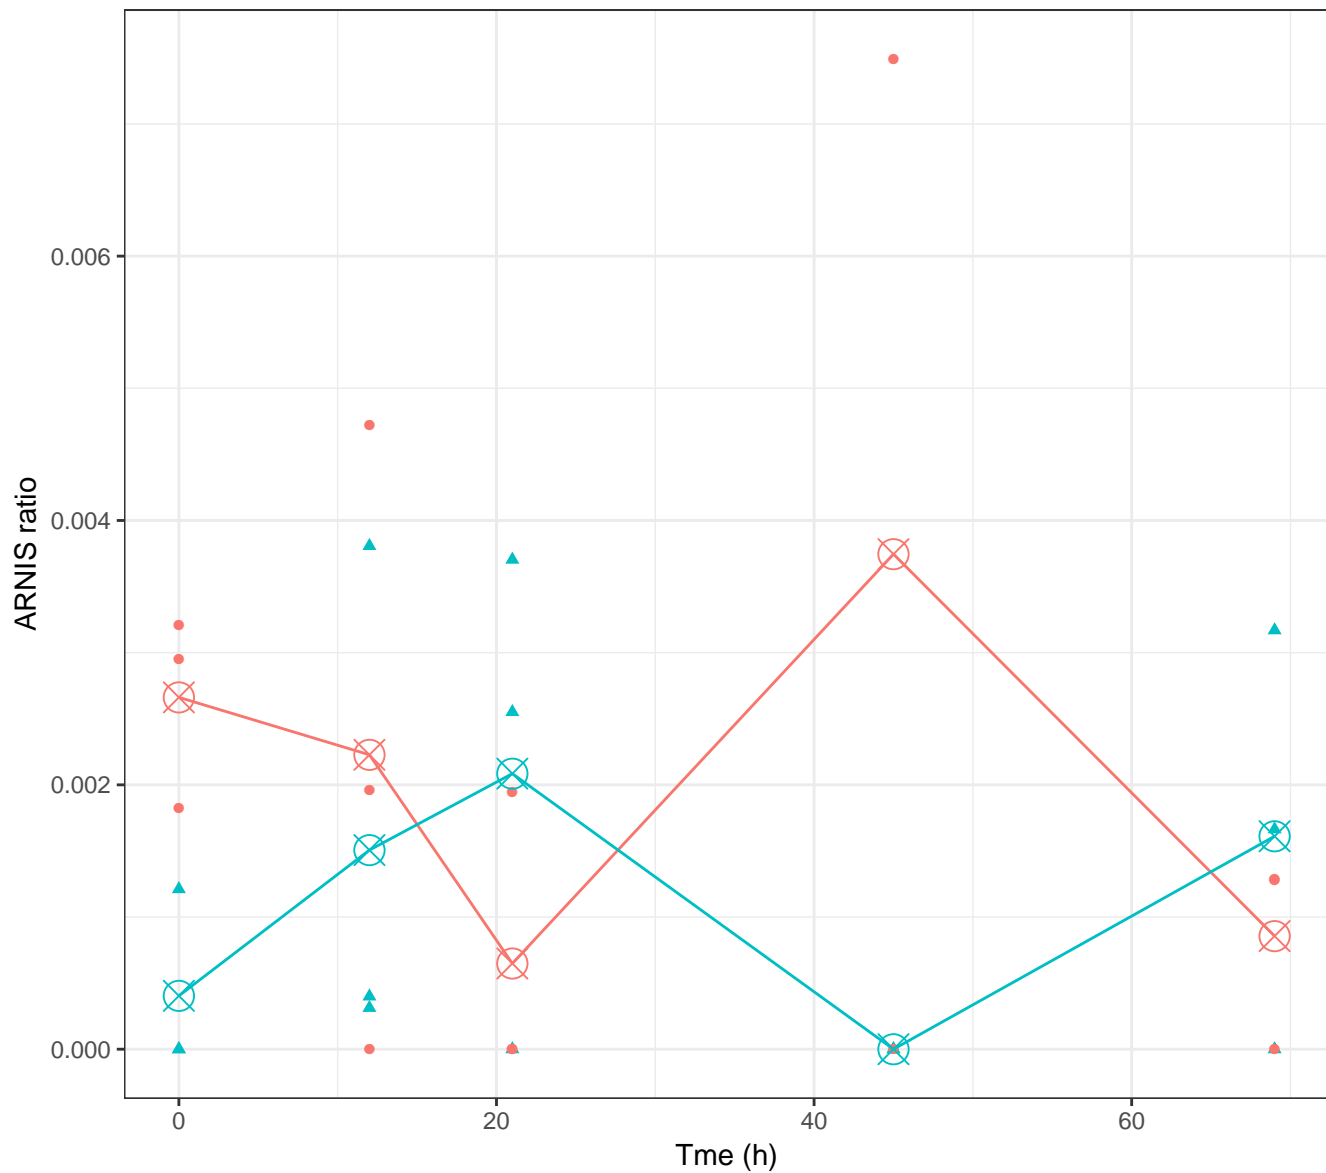

# OTU.4445\_Actinobacteria\_Microcella

Treatment ⊗ Control ⊗ Filtered-1micron

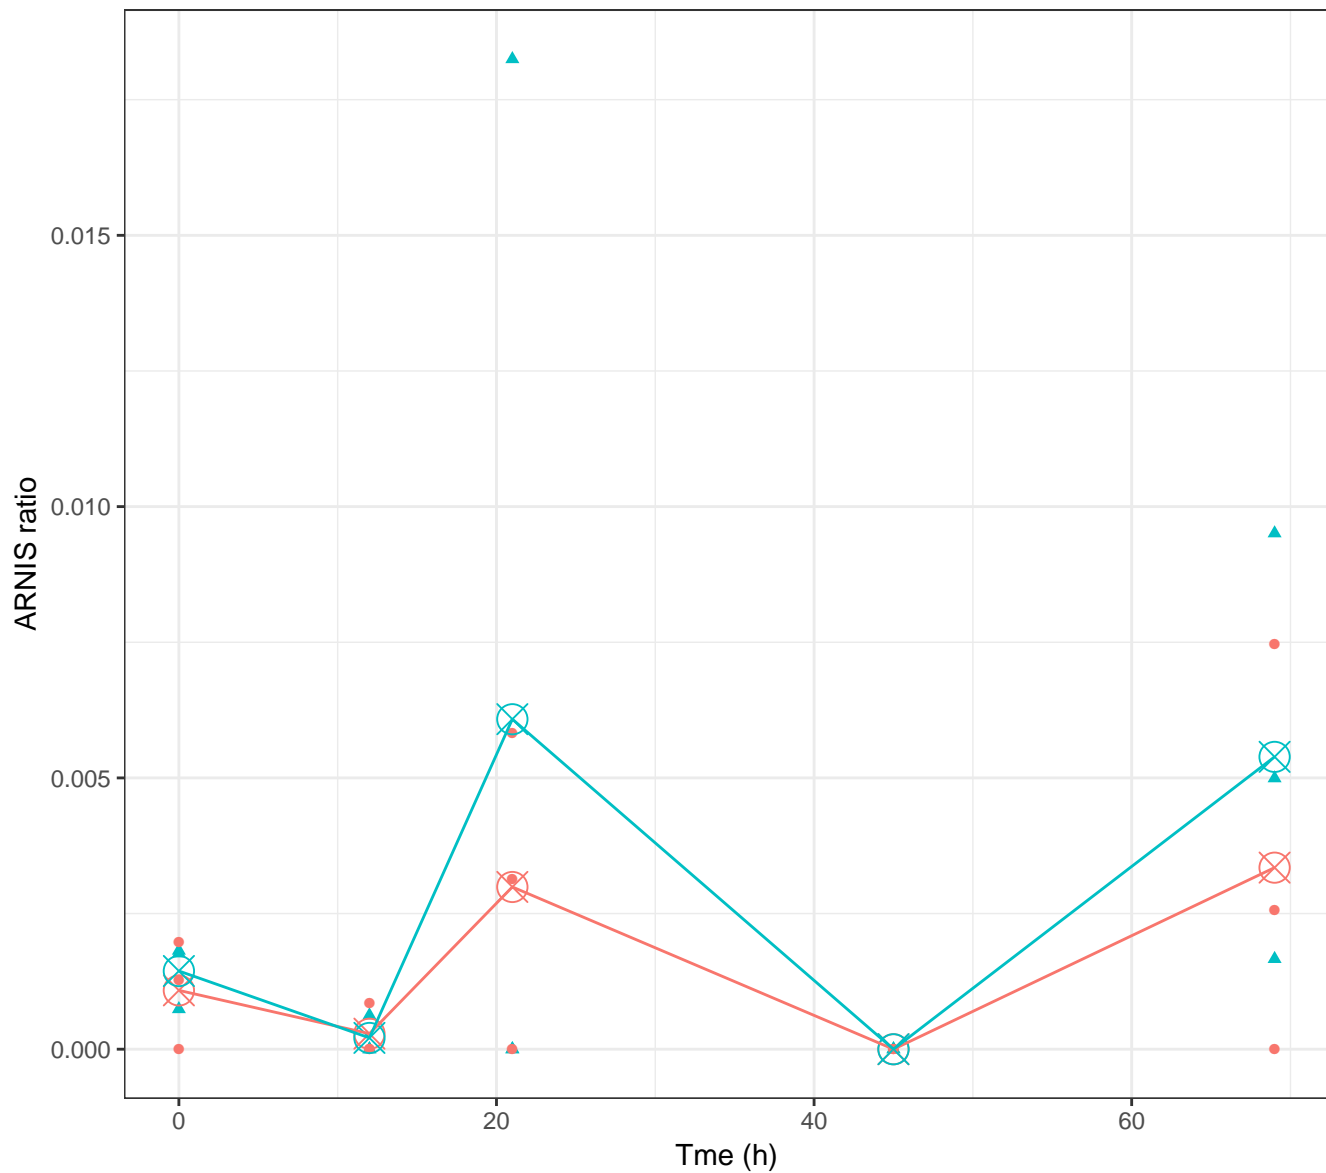

# OTU.1897\_Alphaproteobacteria\_Rhodobacter

Treatment Control Filtered-1micron

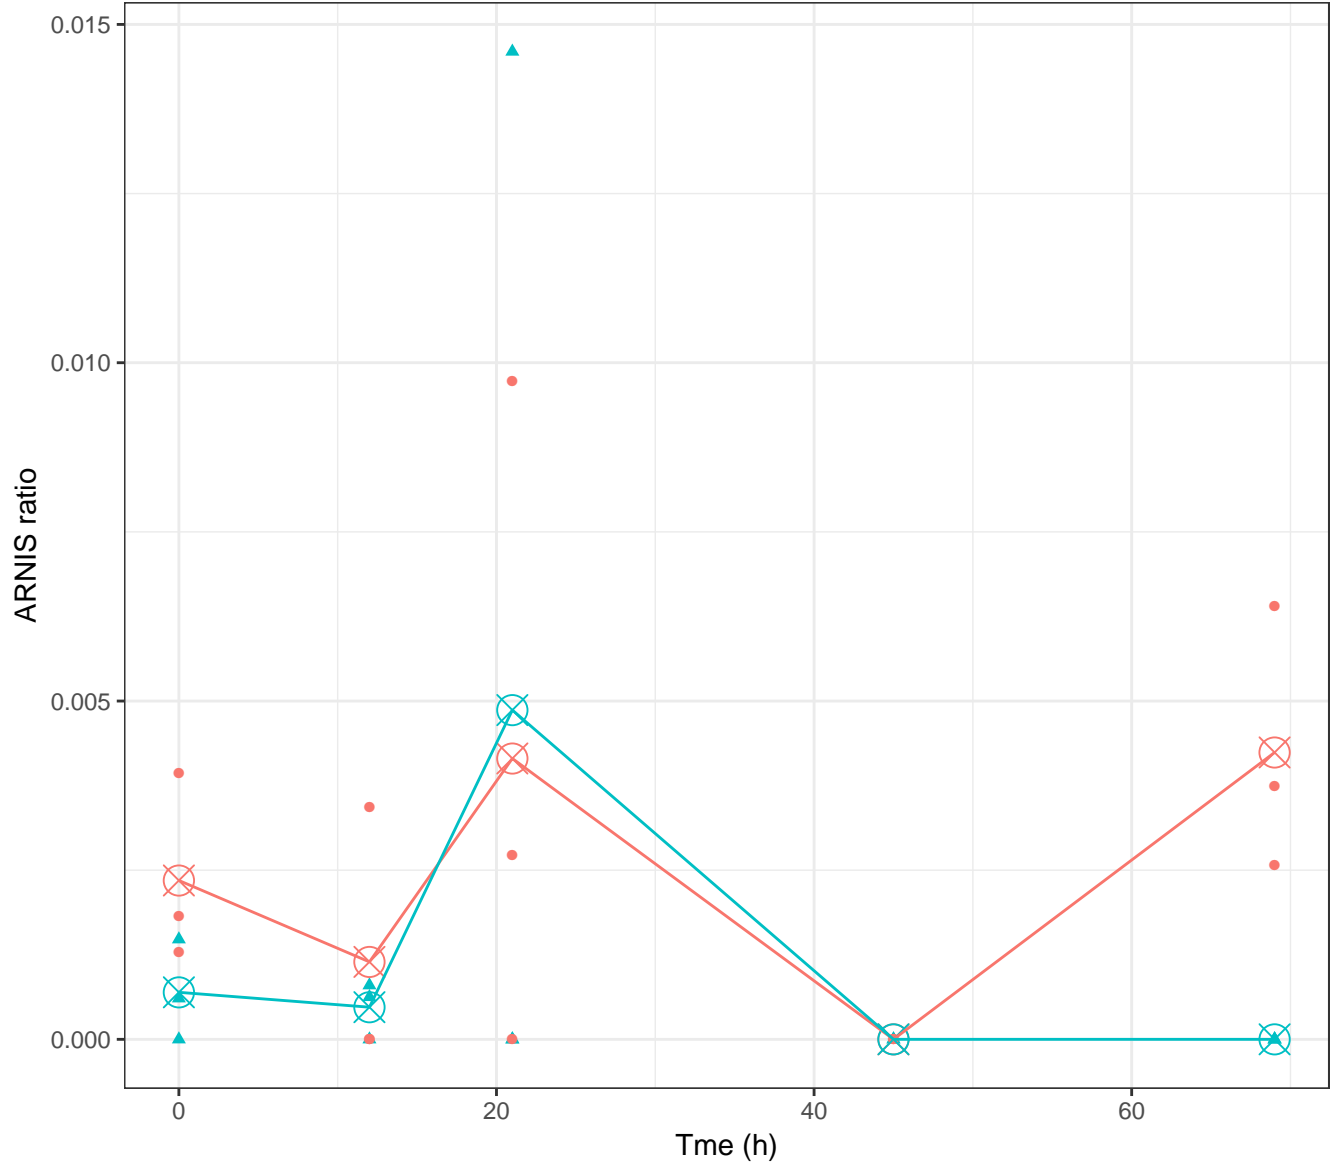

# OTU.80\_Actinobacteria\_Acidimicrobiales

Treatment Control Filtered-1micron

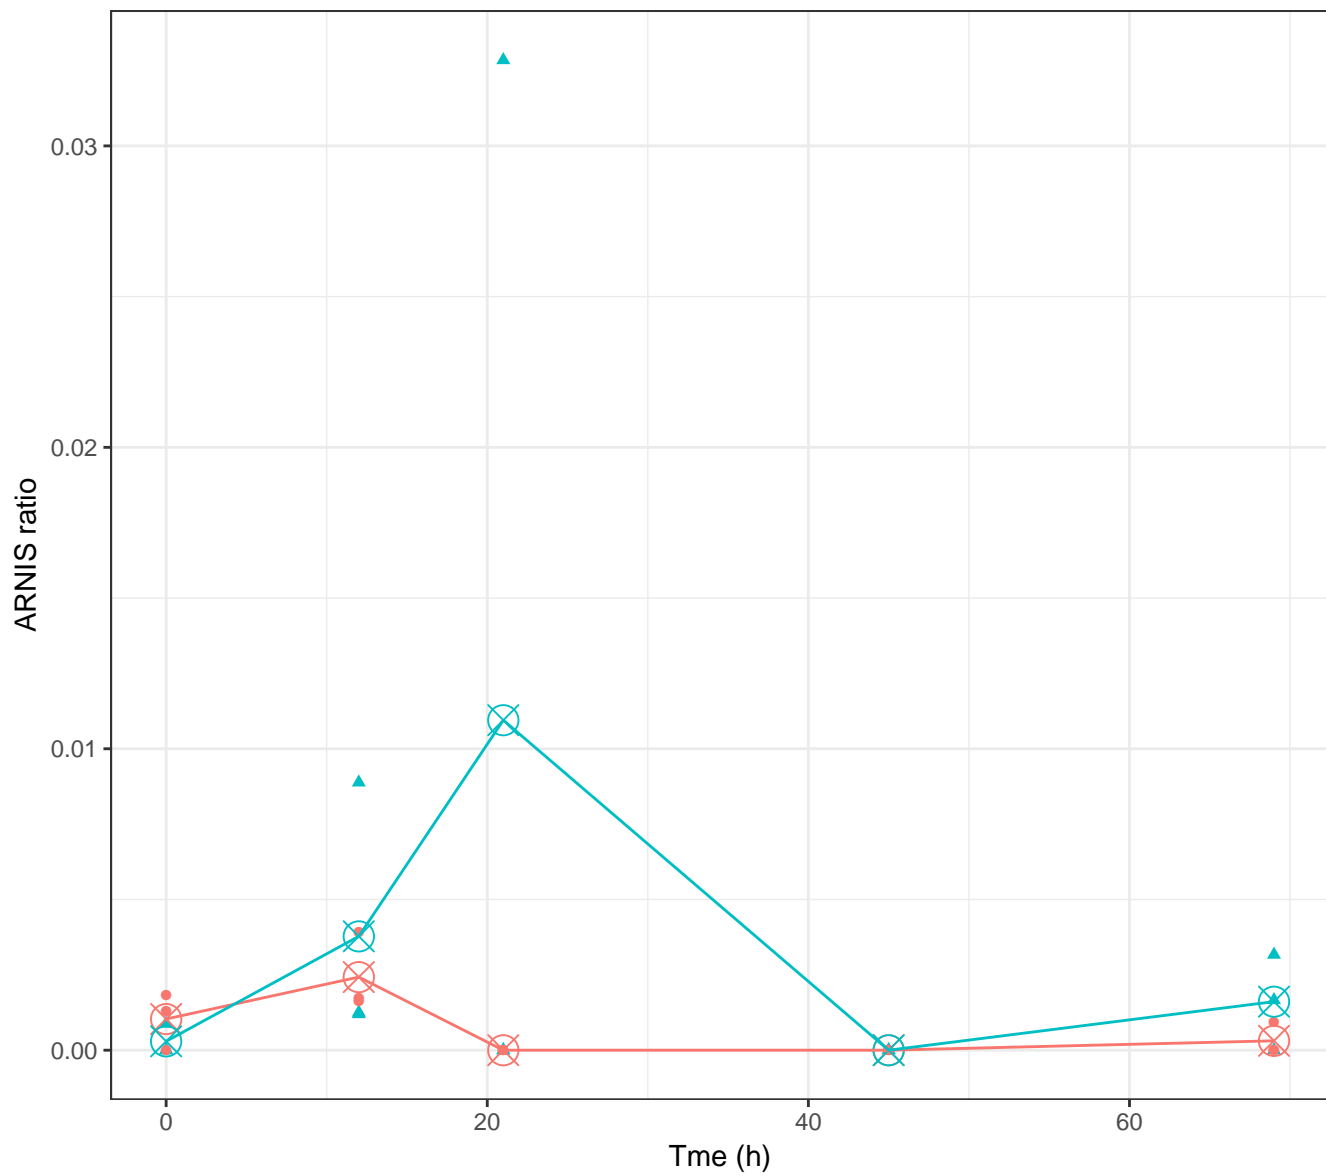

# OTU.1289\_Bacteroidetes\_Saprospiraceae

Treatment ⊗ Control ⊗ Filtered-1micron

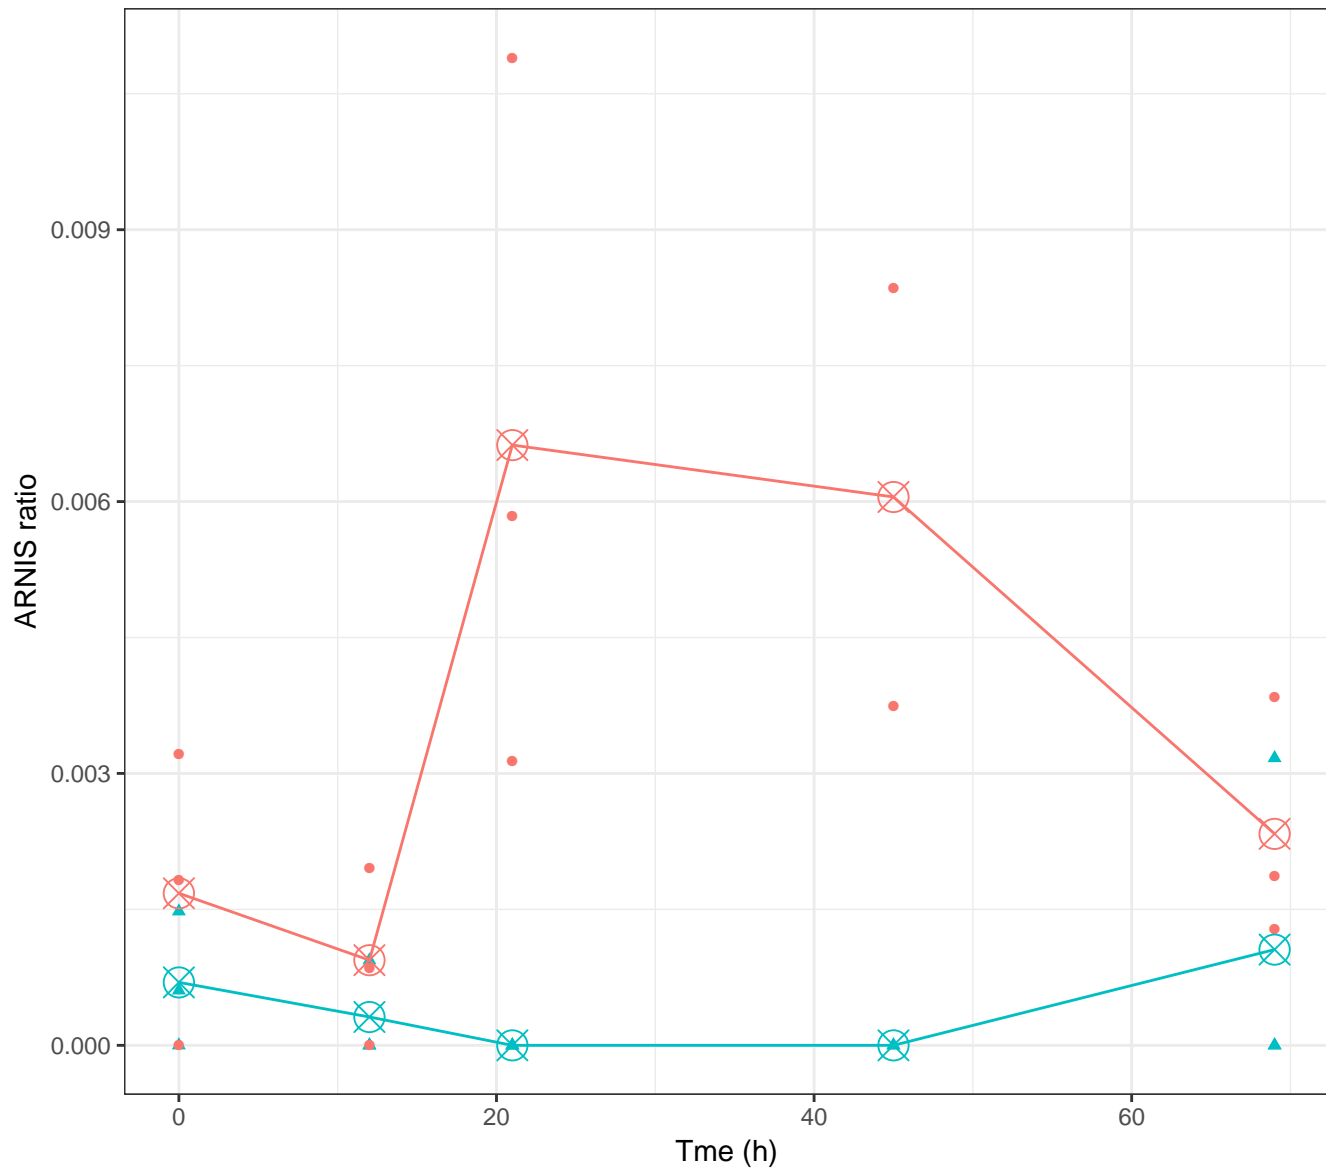

# OTU.650\_Bacteroidetes\_Flavobacterium

Treatment ⊗ Control ⊗ Filtered-1micron

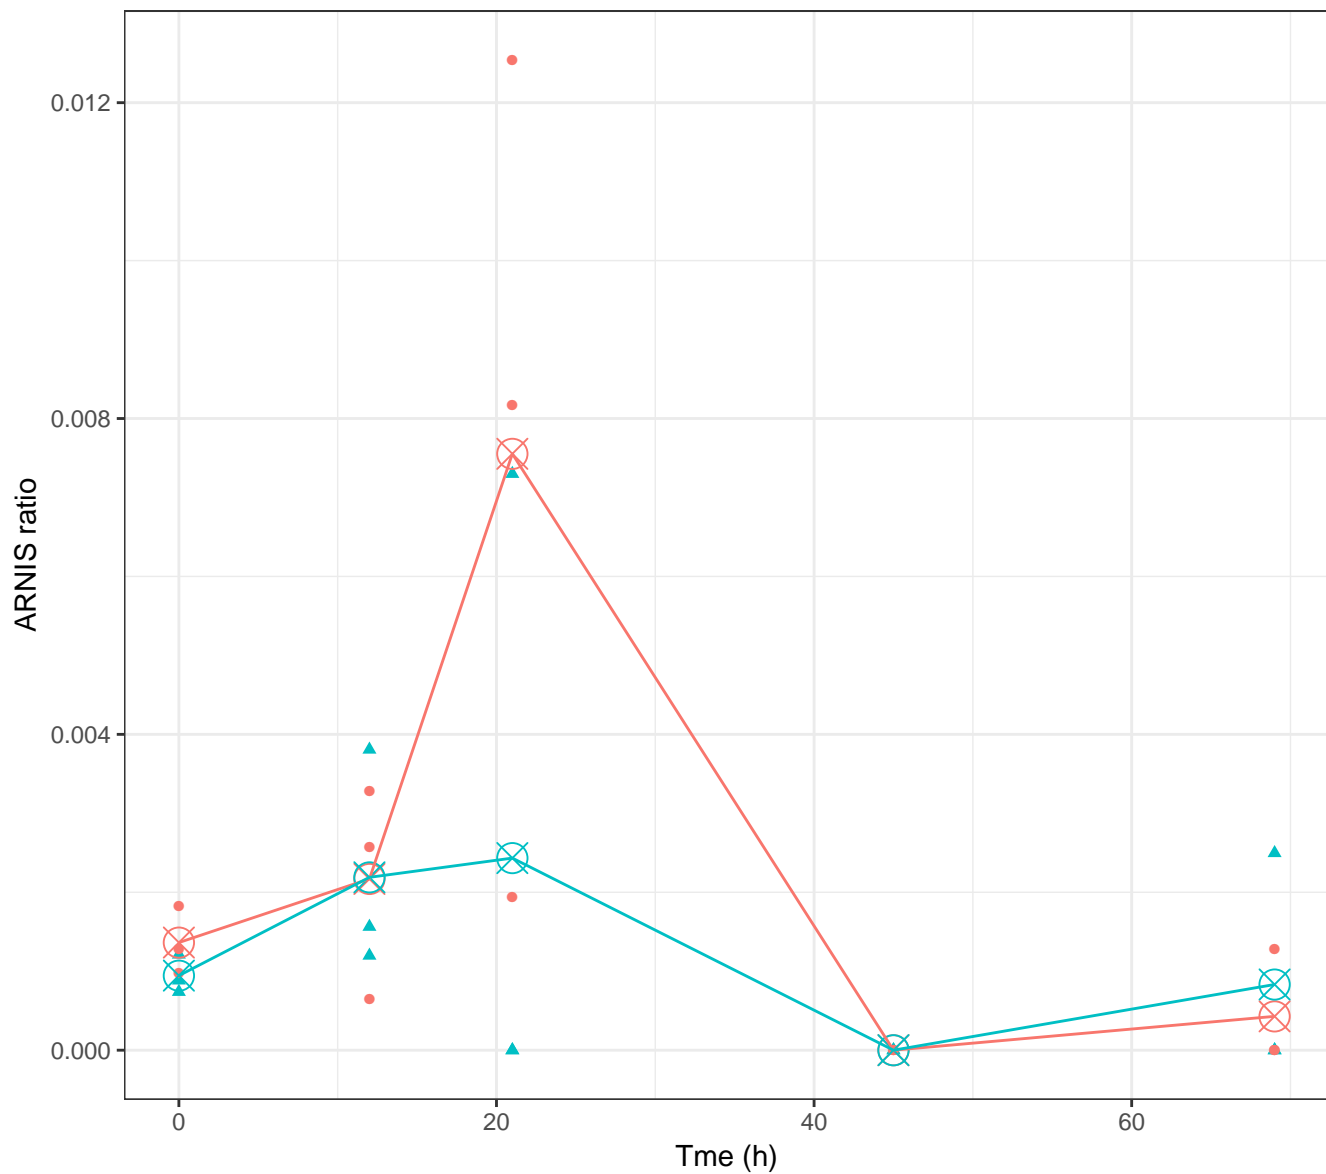

# OTU.29\_Bacteroidetes\_Filimonas

Treatment ⊗ Control ⊗ Filtered-1micron

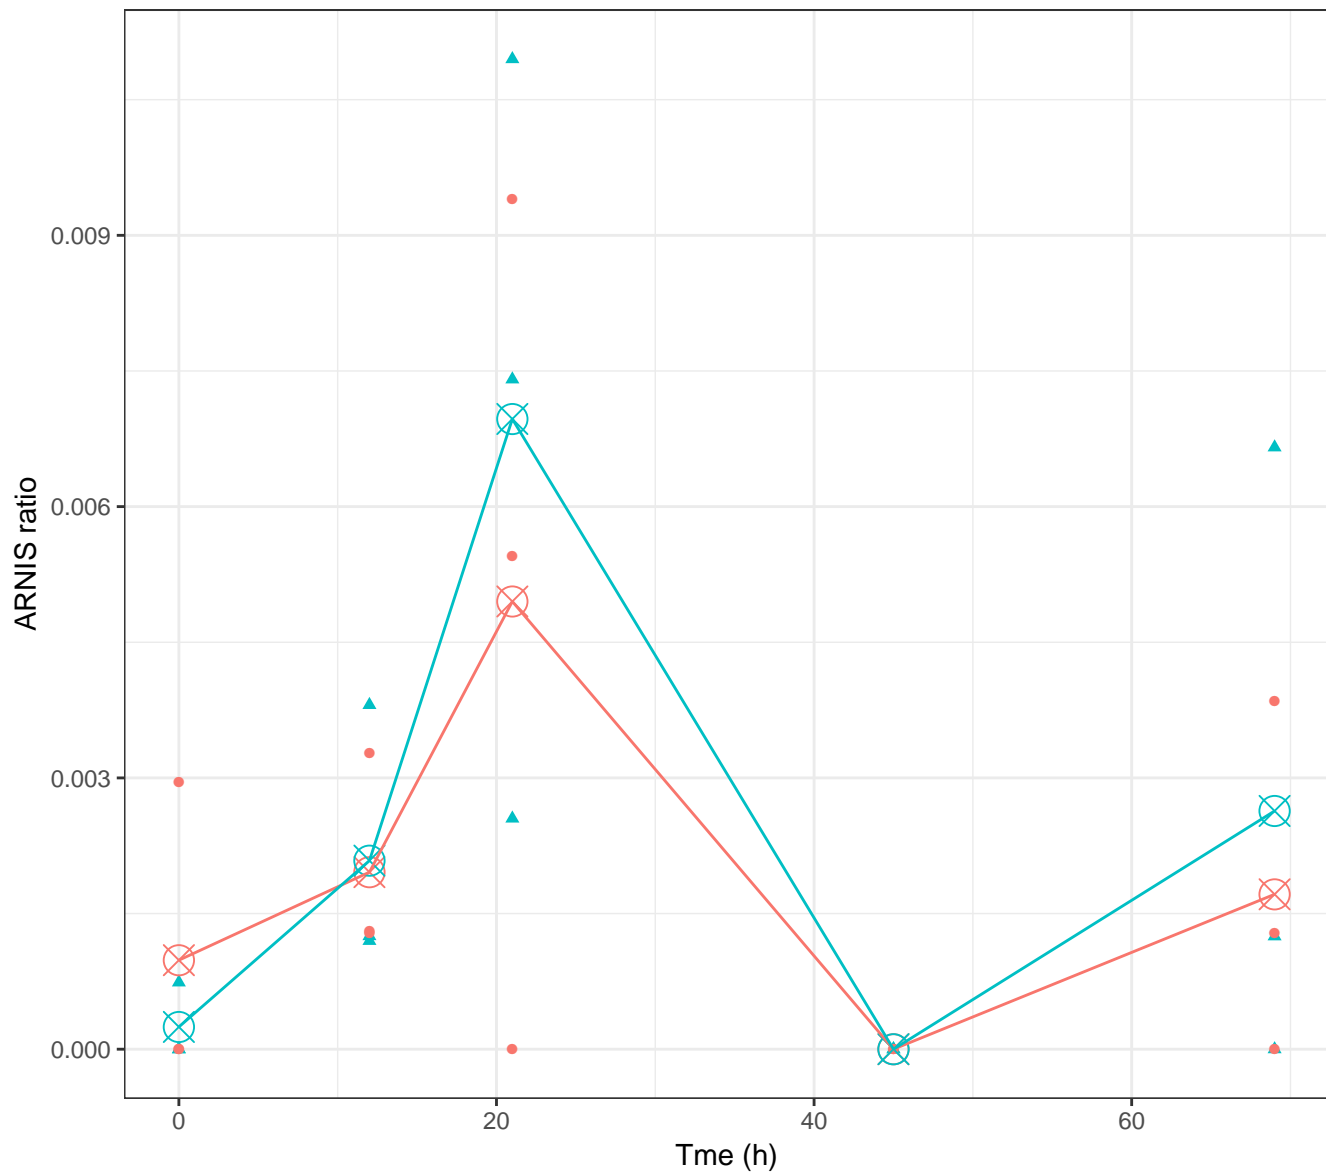

# OTU.405\_Actinobacteria\_Actinomycetales

Treatment Control Filtered-1micron

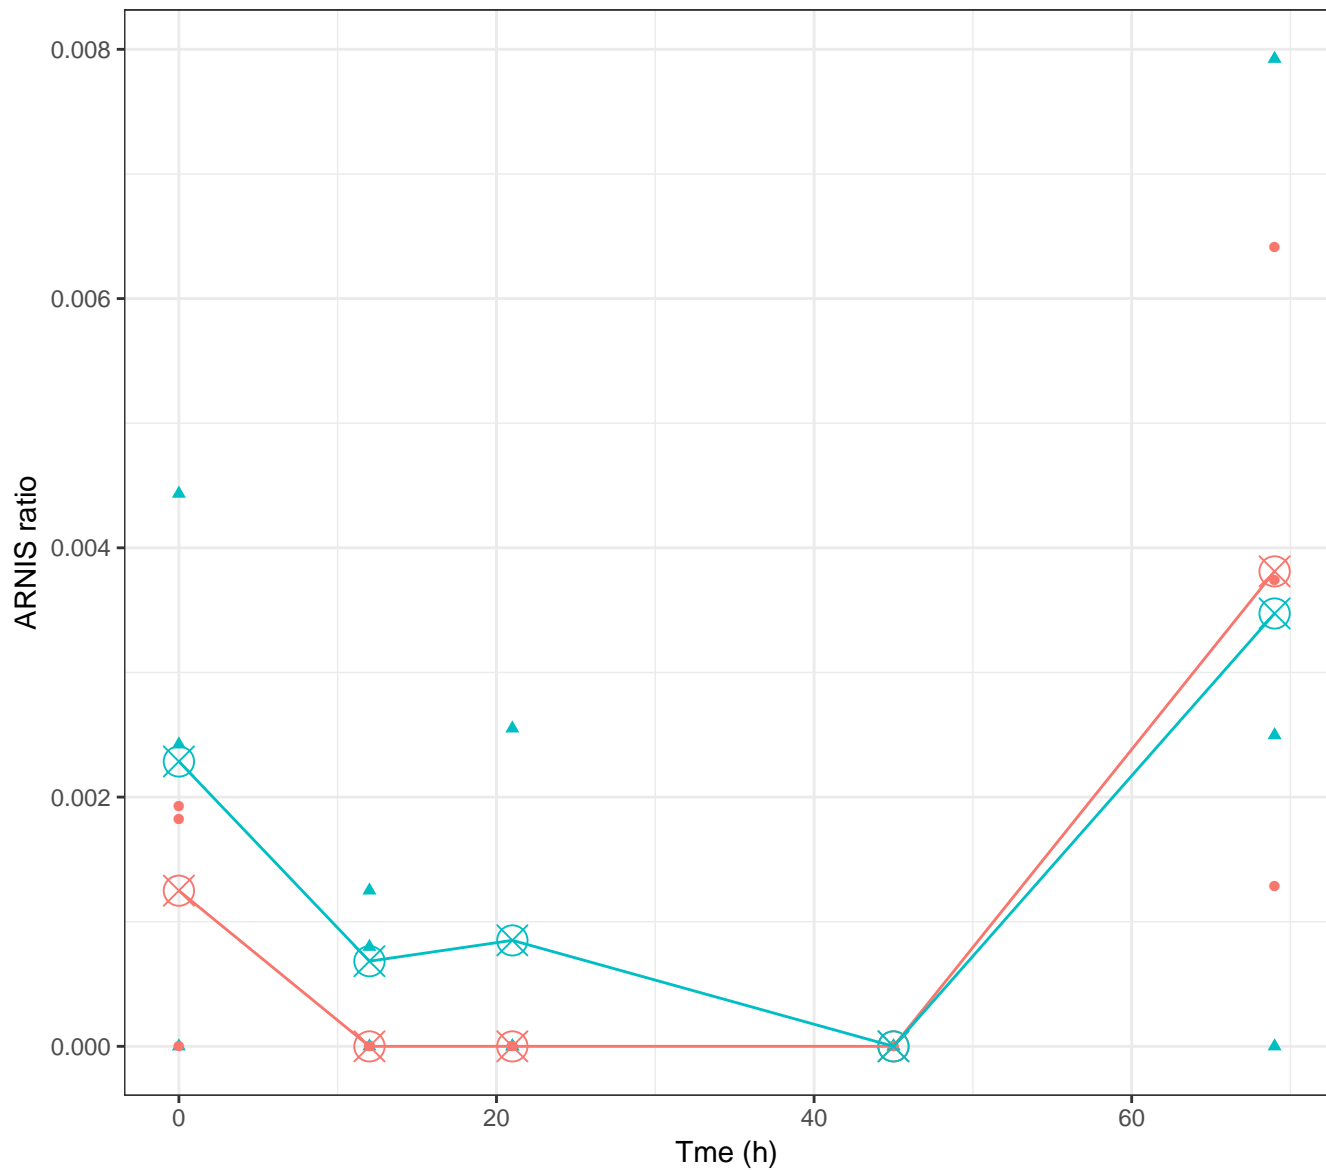



# OTU.1169\_Actinobacteria\_Candidatus\_Limnoluna

Treatment ⊗ Control ⊗ Filtered-1micron

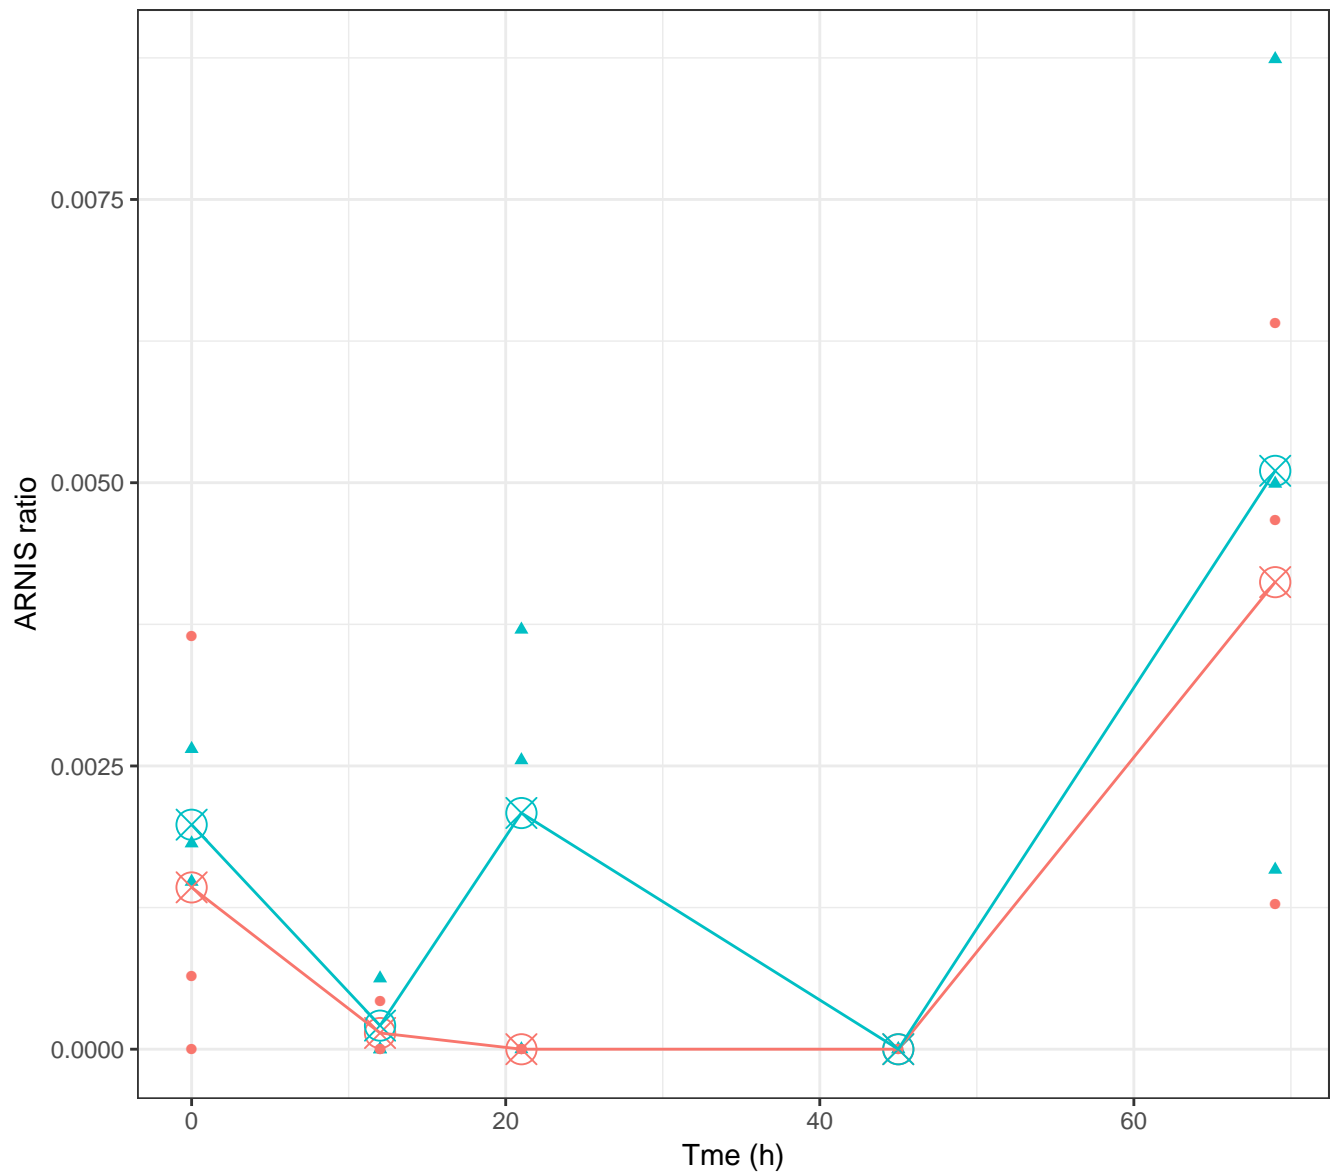

# OTU.1184\_Betaproteobacteria\_Massilia

Treatment Control Filtered-1micron

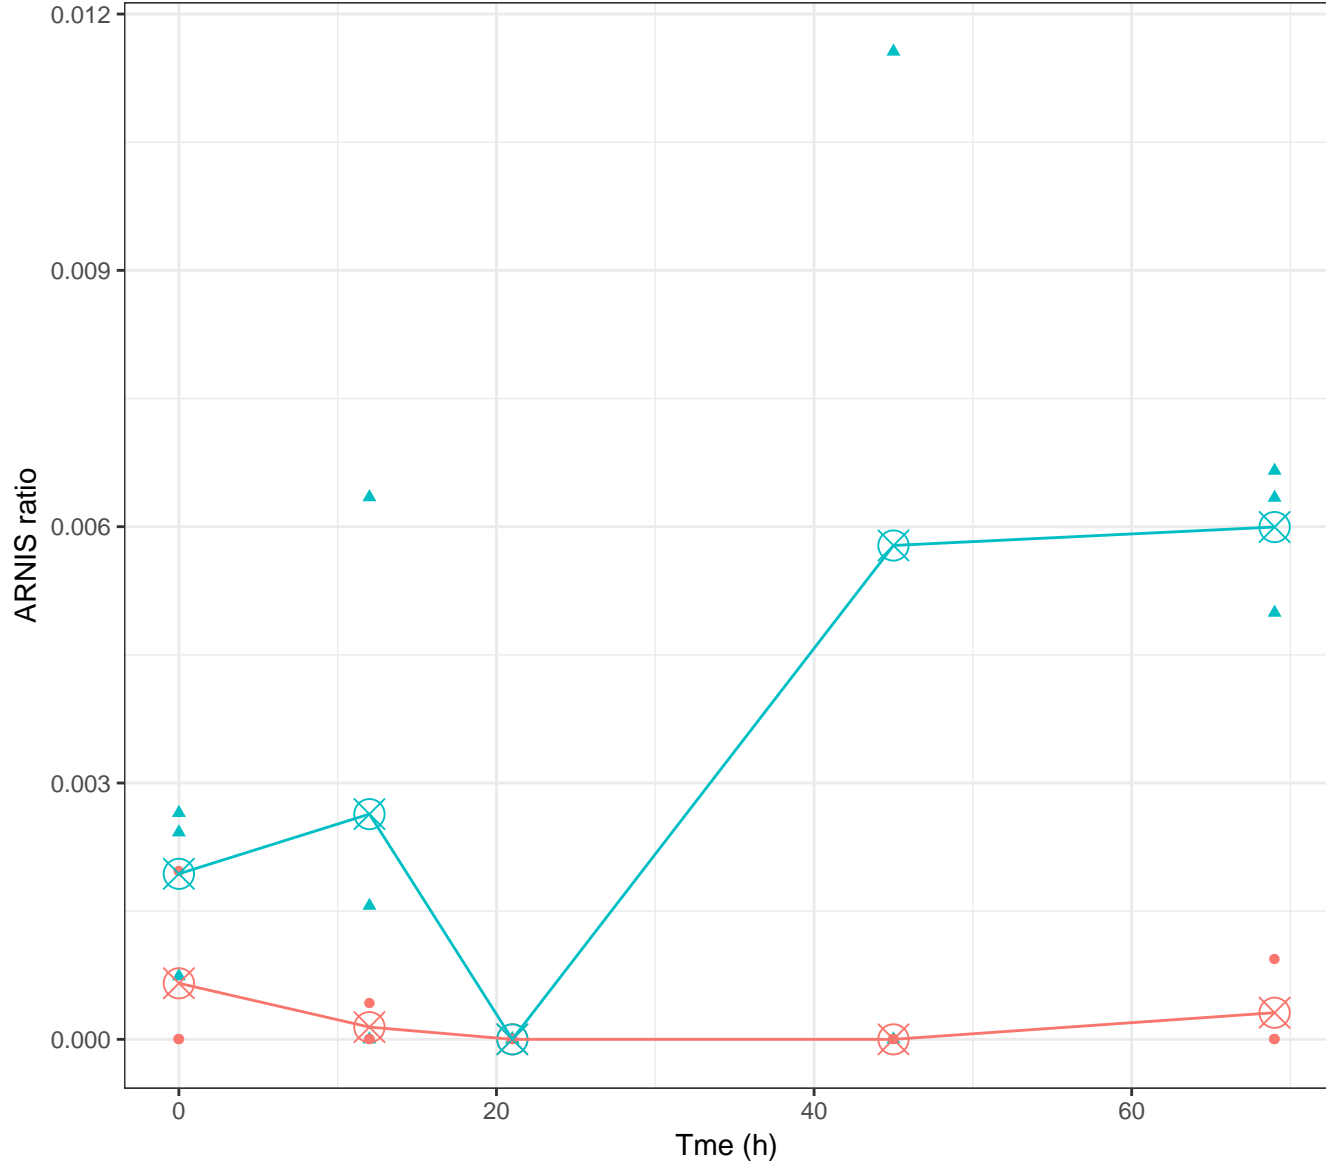

# OTU.2931\_Verrucomicrobia\_Opitutae

Treatment ⊗ Control ⊗ Filtered-1micron

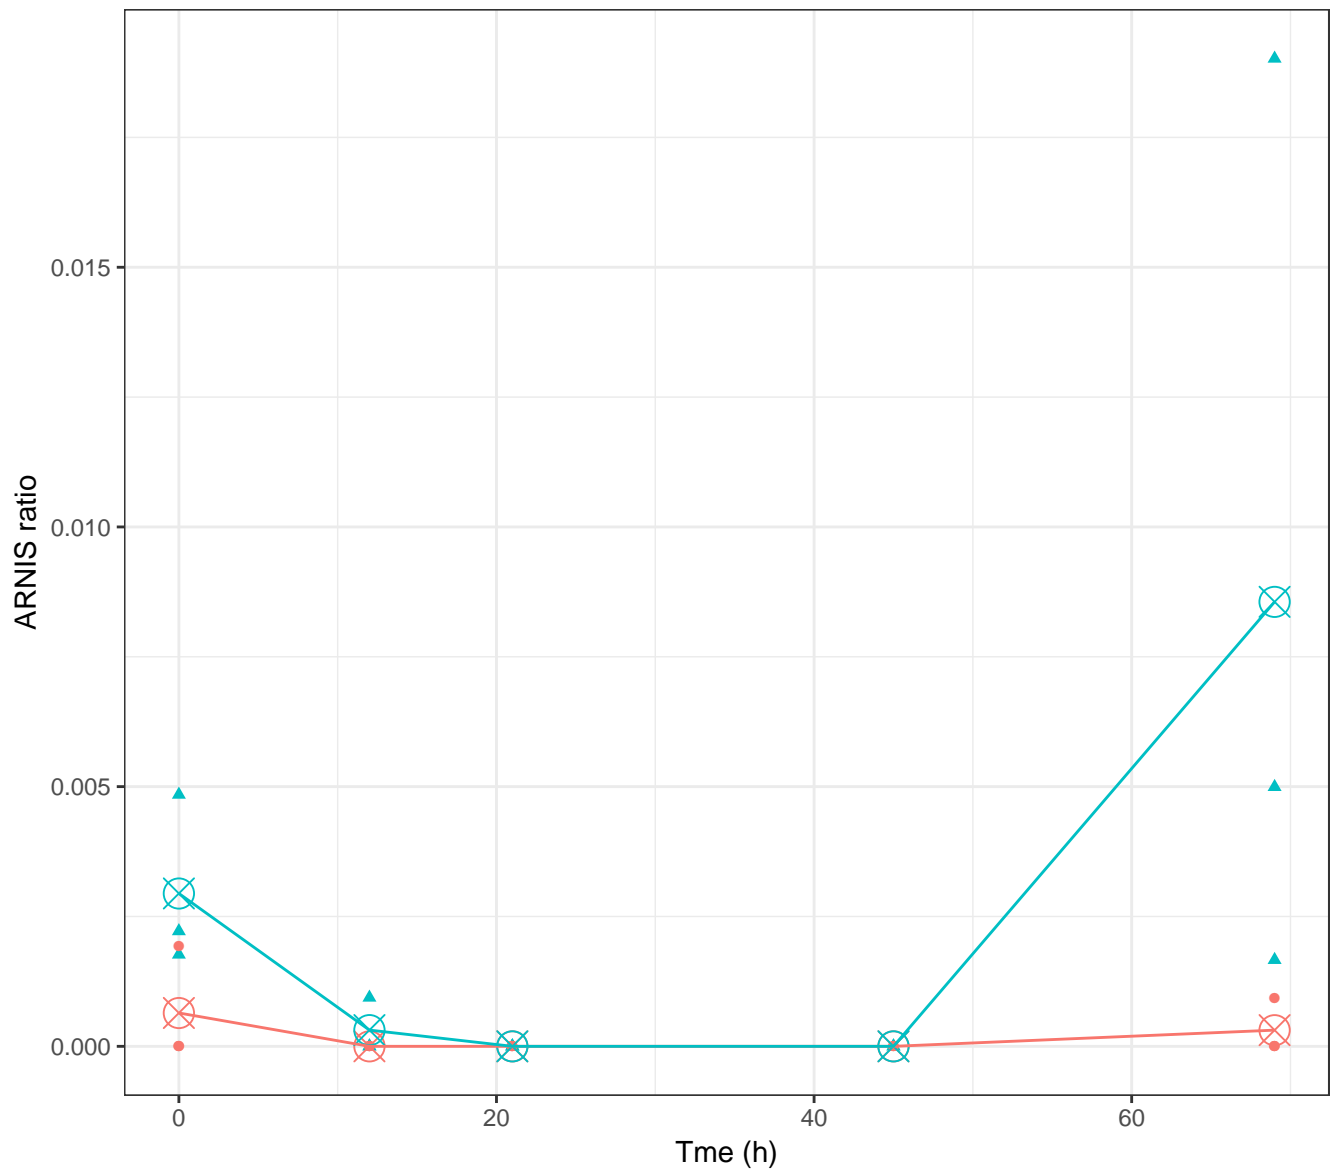

# OTU.200\_Actinobacteria\_clade\_acl.A1

Treatment ⊗ Control ⊗ Filtered-1micron

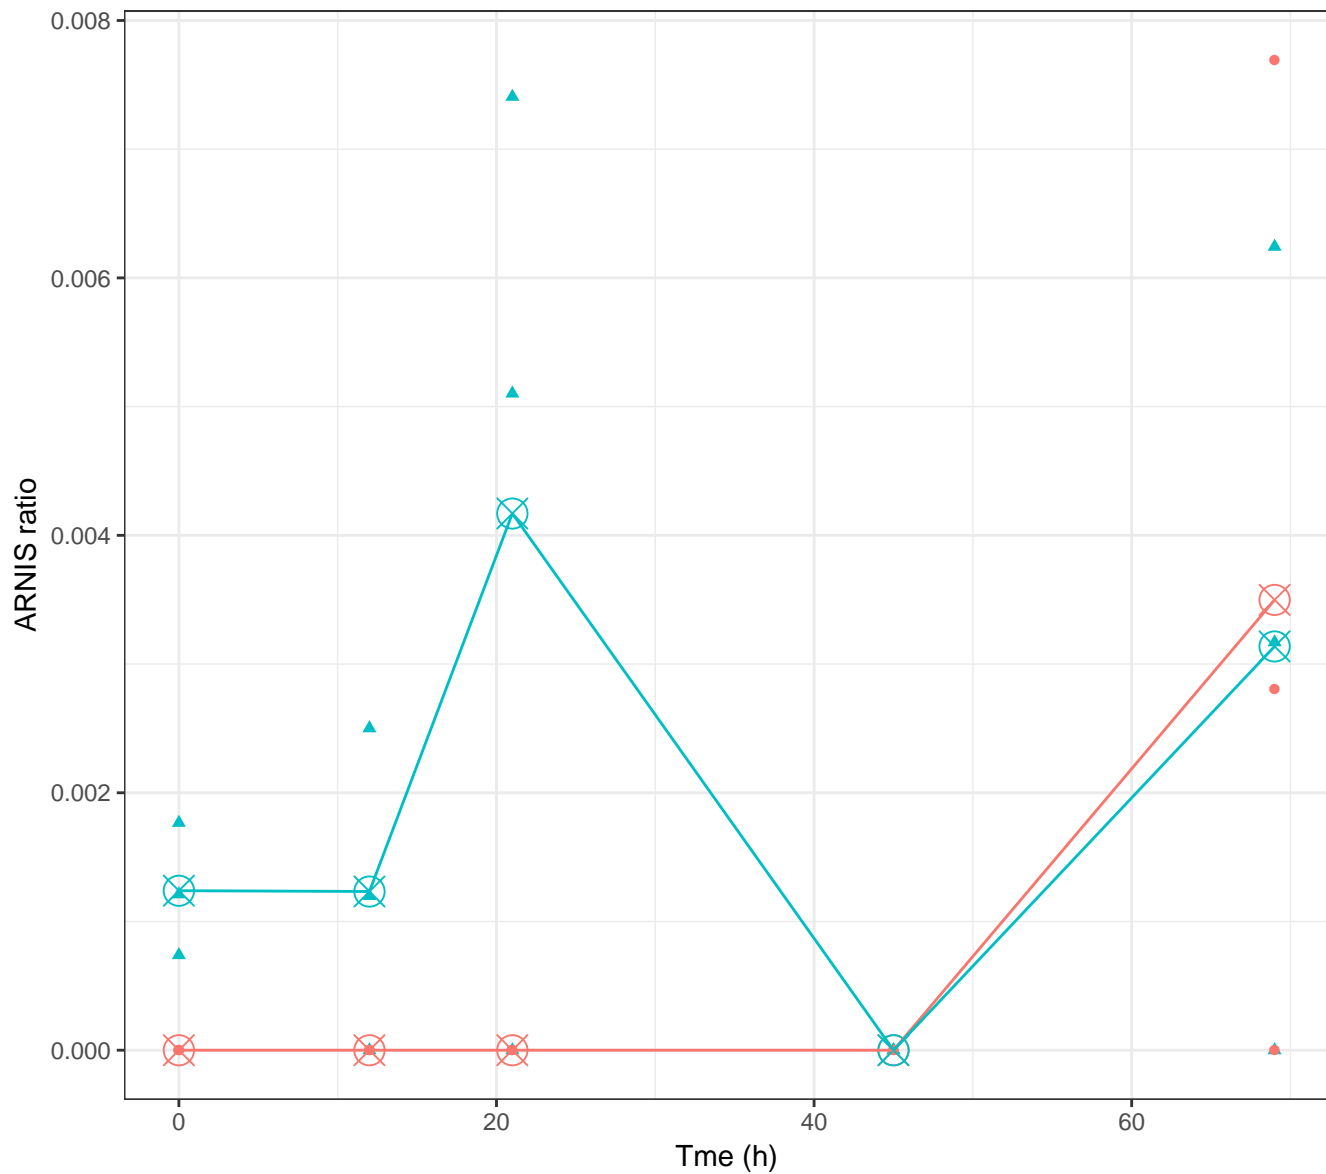

# OTU.1375\_Actinobacteria\_clade\_acVII

Treatment Control Filtered-1micron

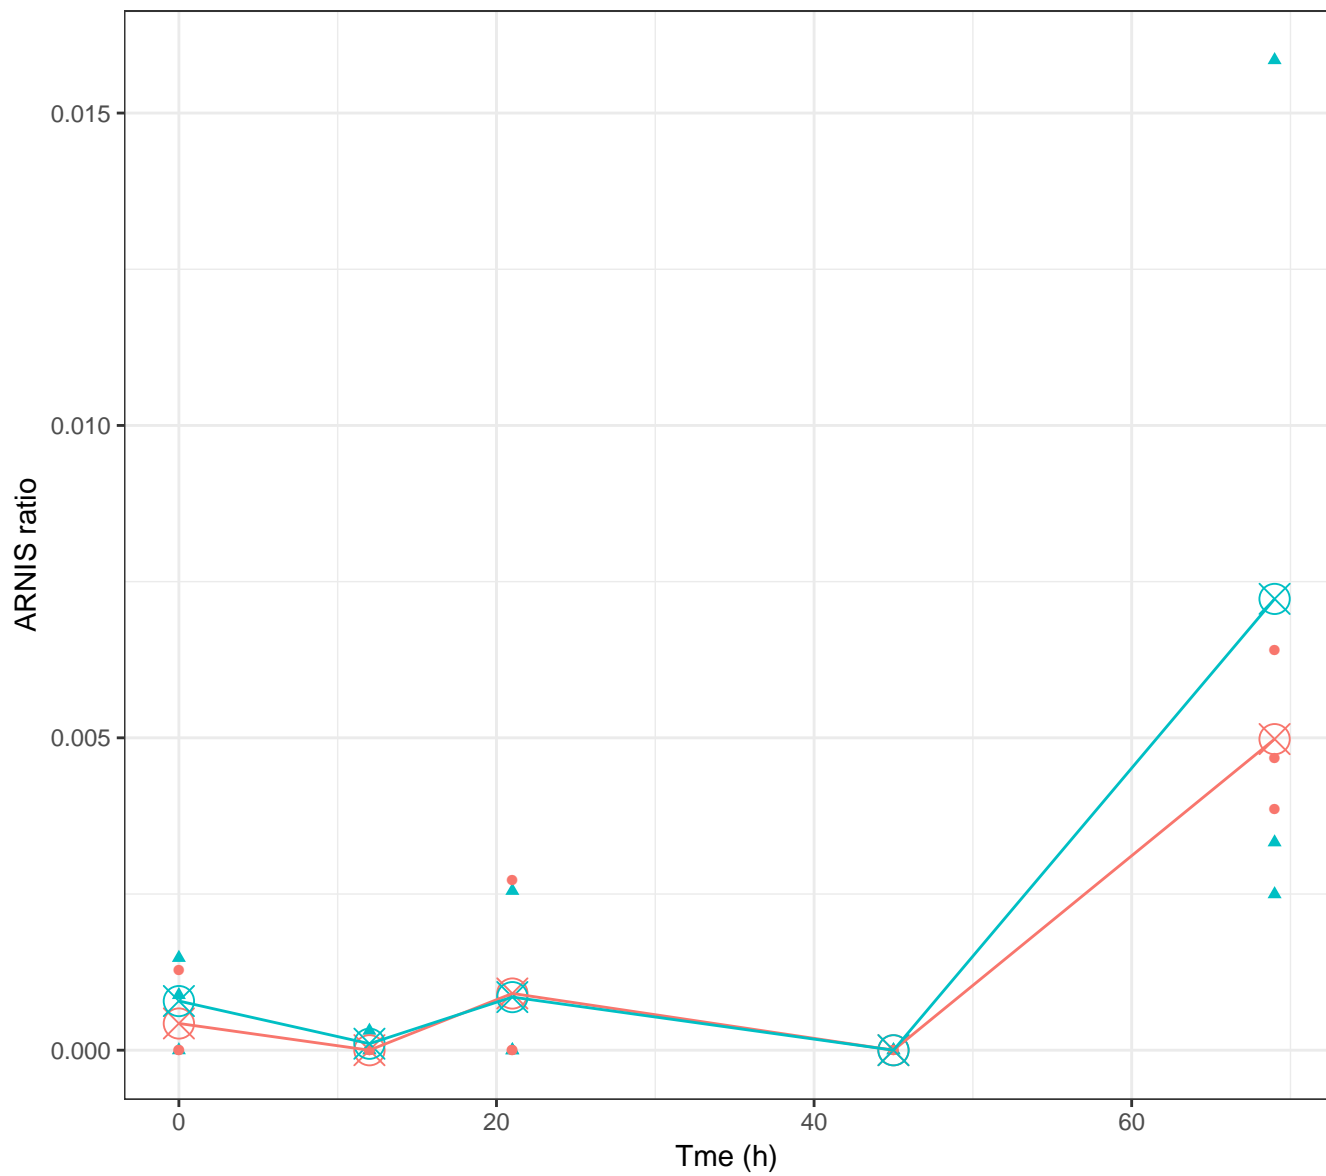

# OTU.100\_Bacteroidetes\_Sphingobacteriales\_NS11.12\_marine\_group

Treatment ⊗ Control ⊗ Filtered-1micron

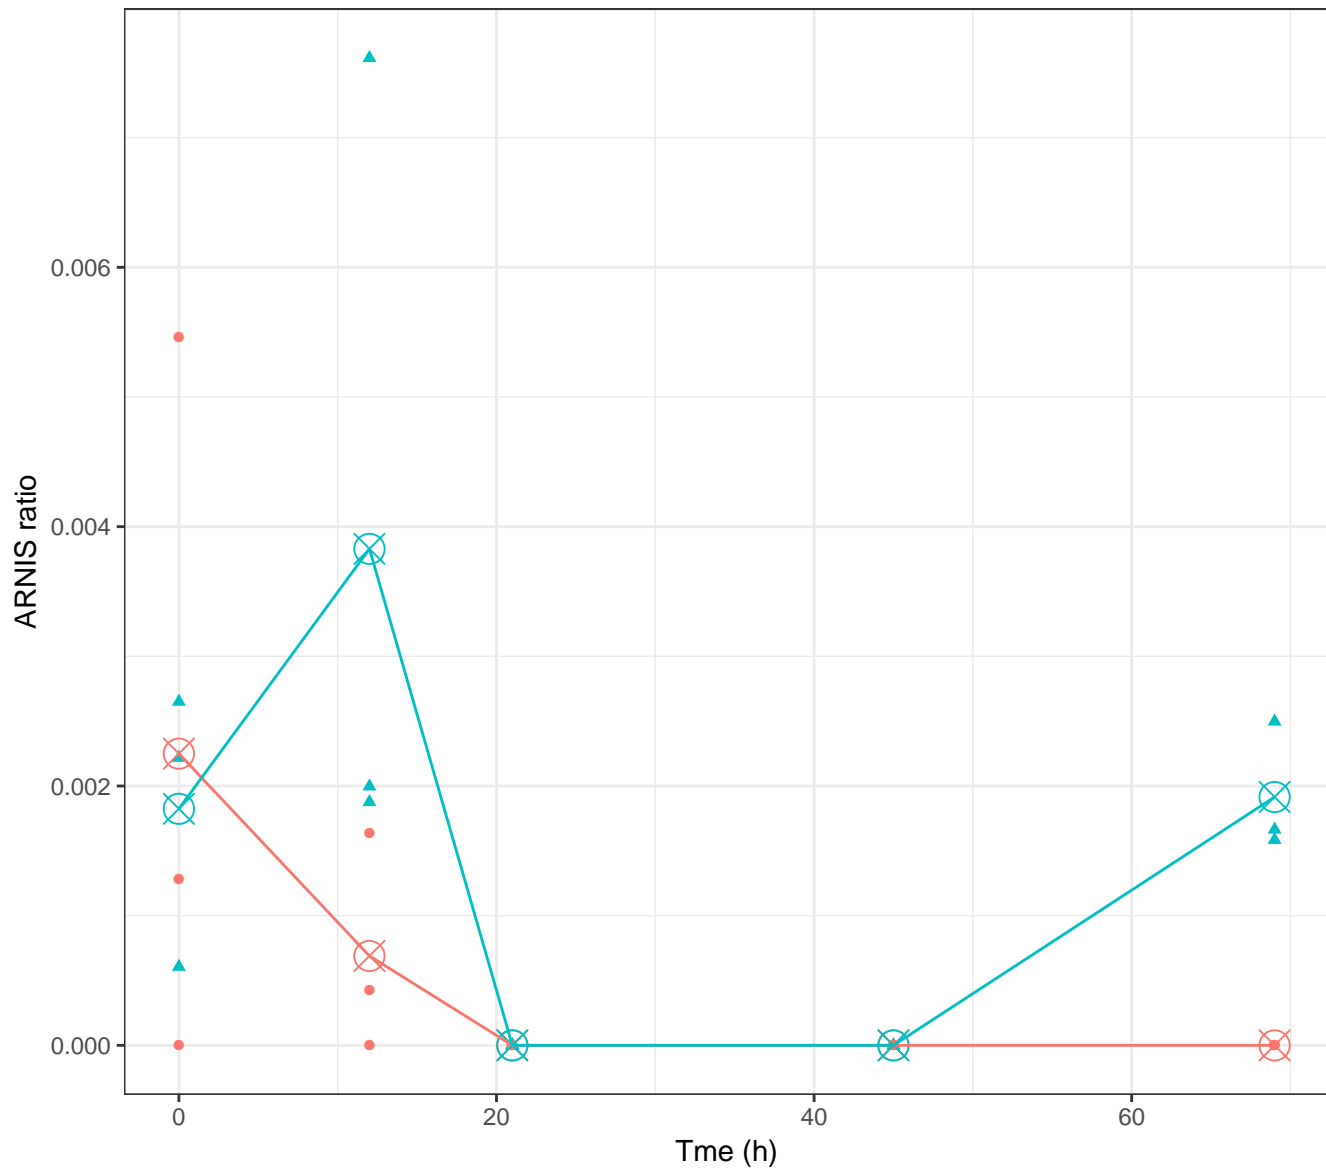

# OTU.740\_Betaproteobacteria\_Variovorax

Treatment ⊗ Control ⊗ Filtered-1micron

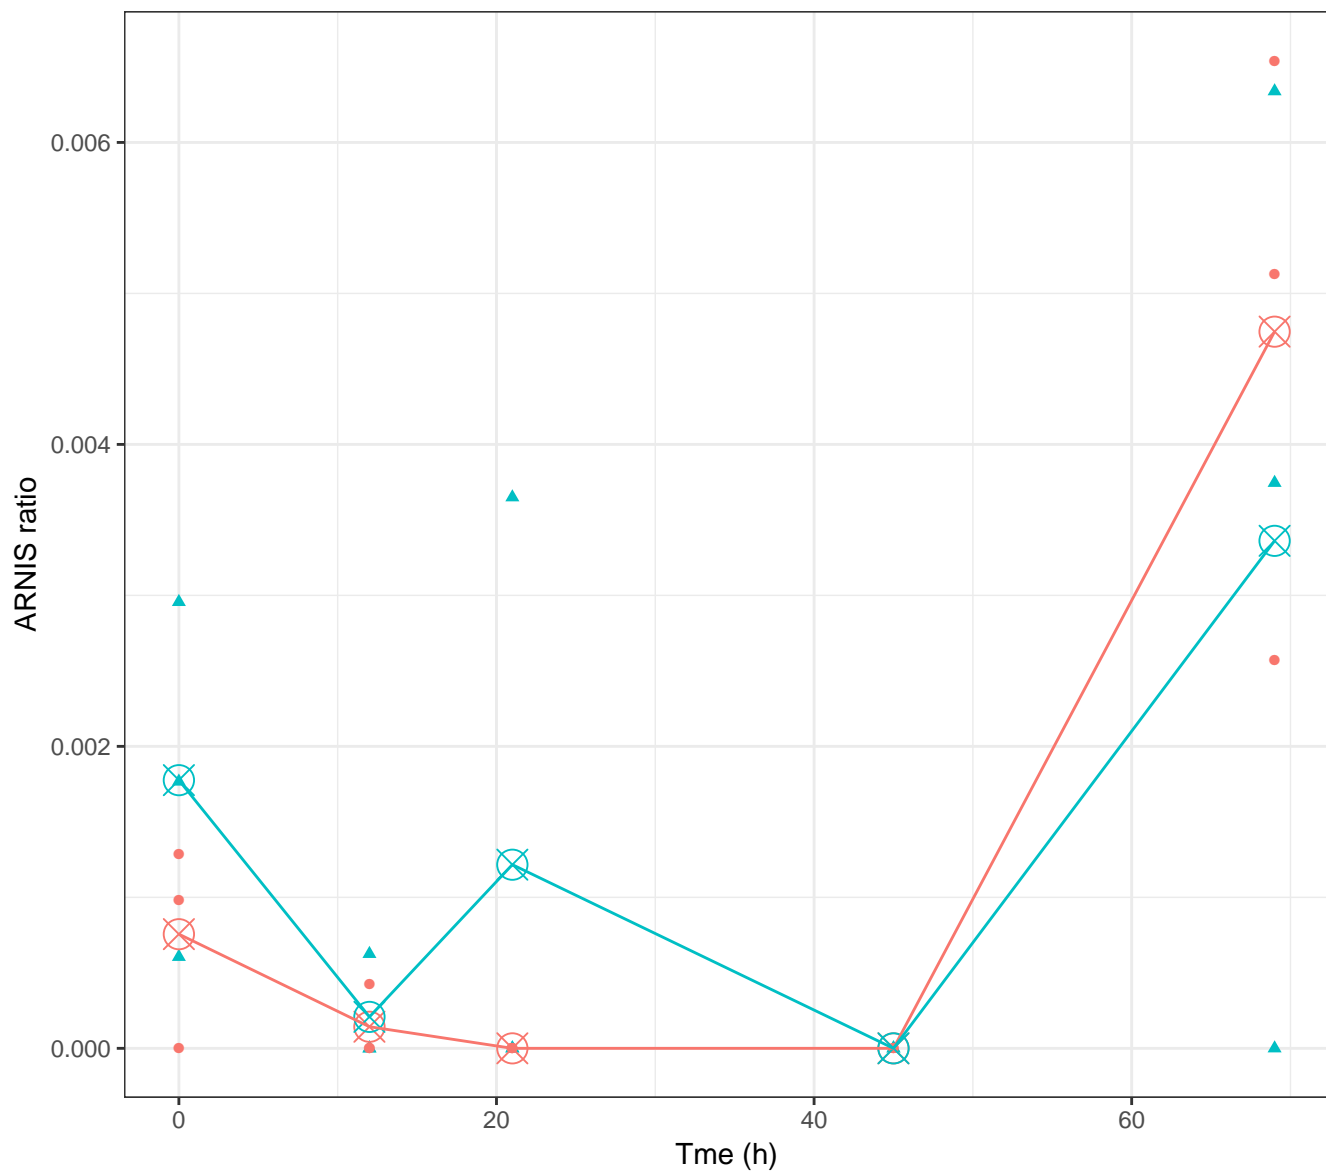

# OTU.431\_Actinobacteria\_CandidatusMicrothrix

Treatment Control Filtered-1micron

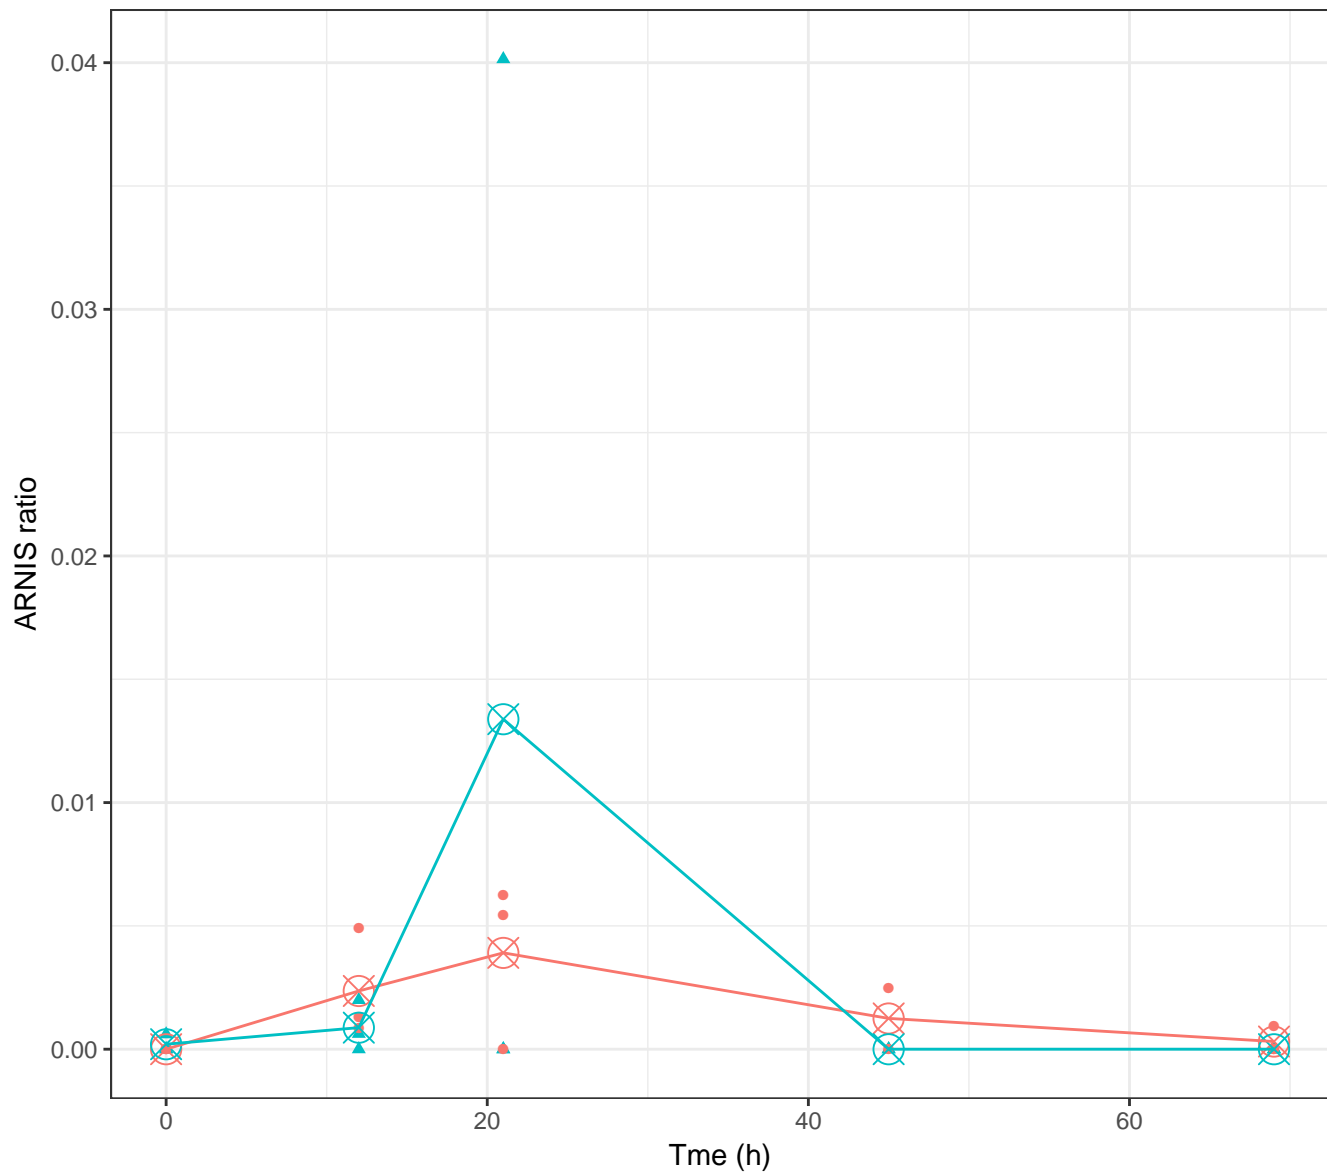



## OTU.455\_Actinobacteria\_clade\_acl.A1

Treatment Control Filtered-1micron

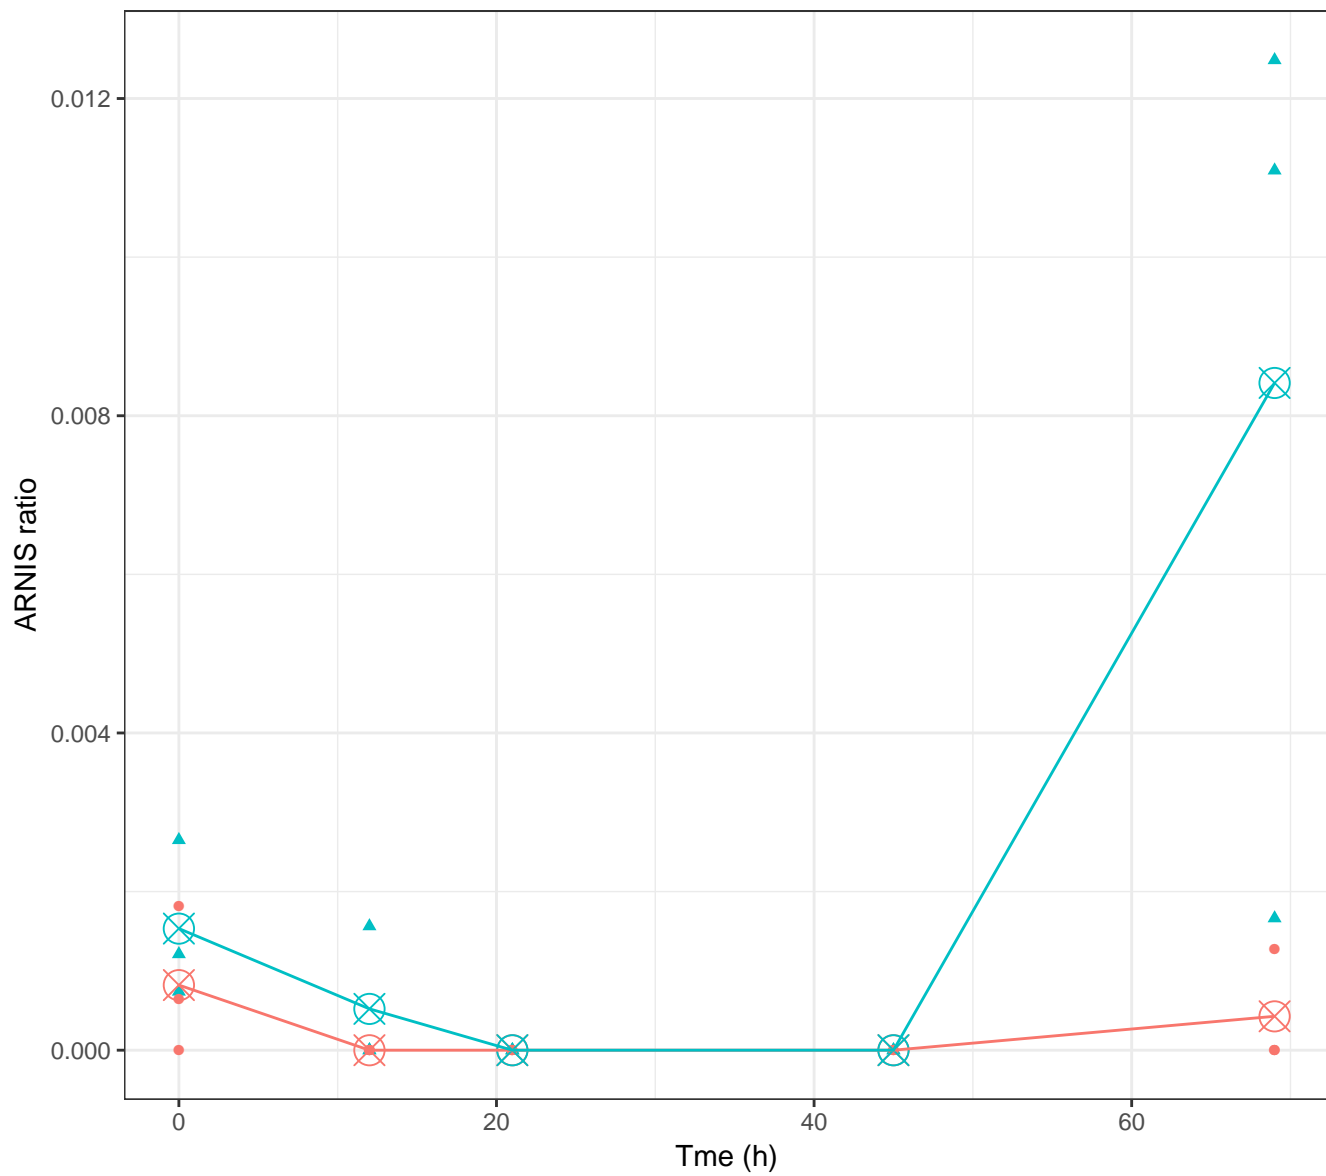

# OTU.63\_Verrucomicrobia\_Luteolibacter

Treatment Control Filtered-1micron

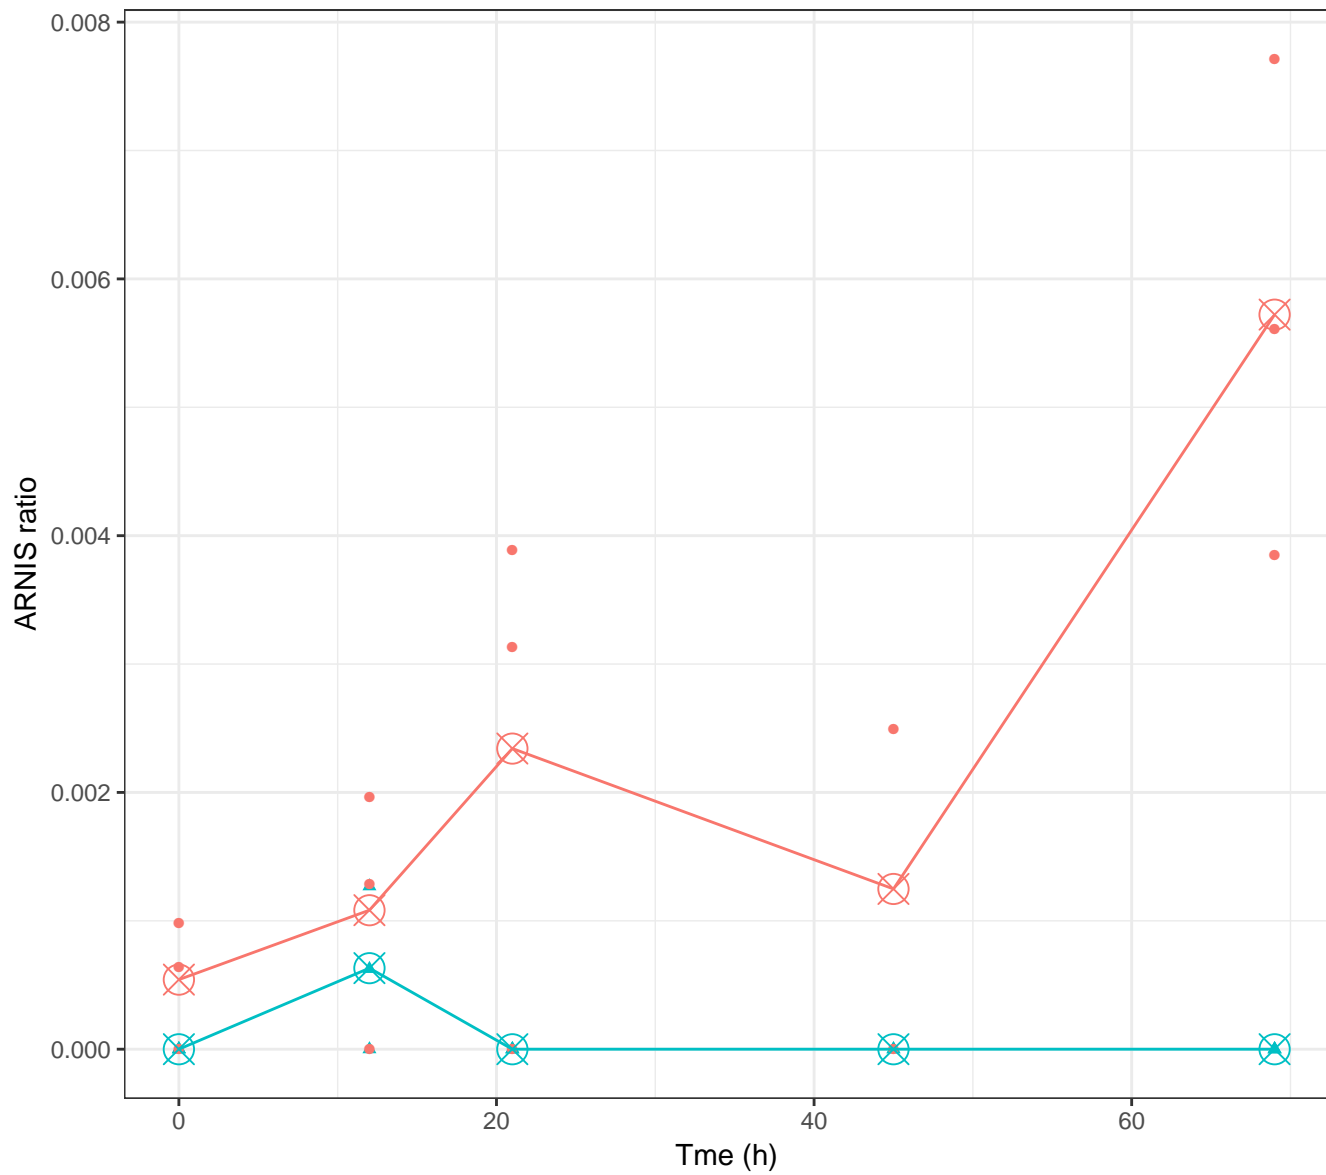

# OTU.263\_Alphaproteobacteria\_Rickettsiaceae

Treatment ⊗ Control ⊗ Filtered-1micron

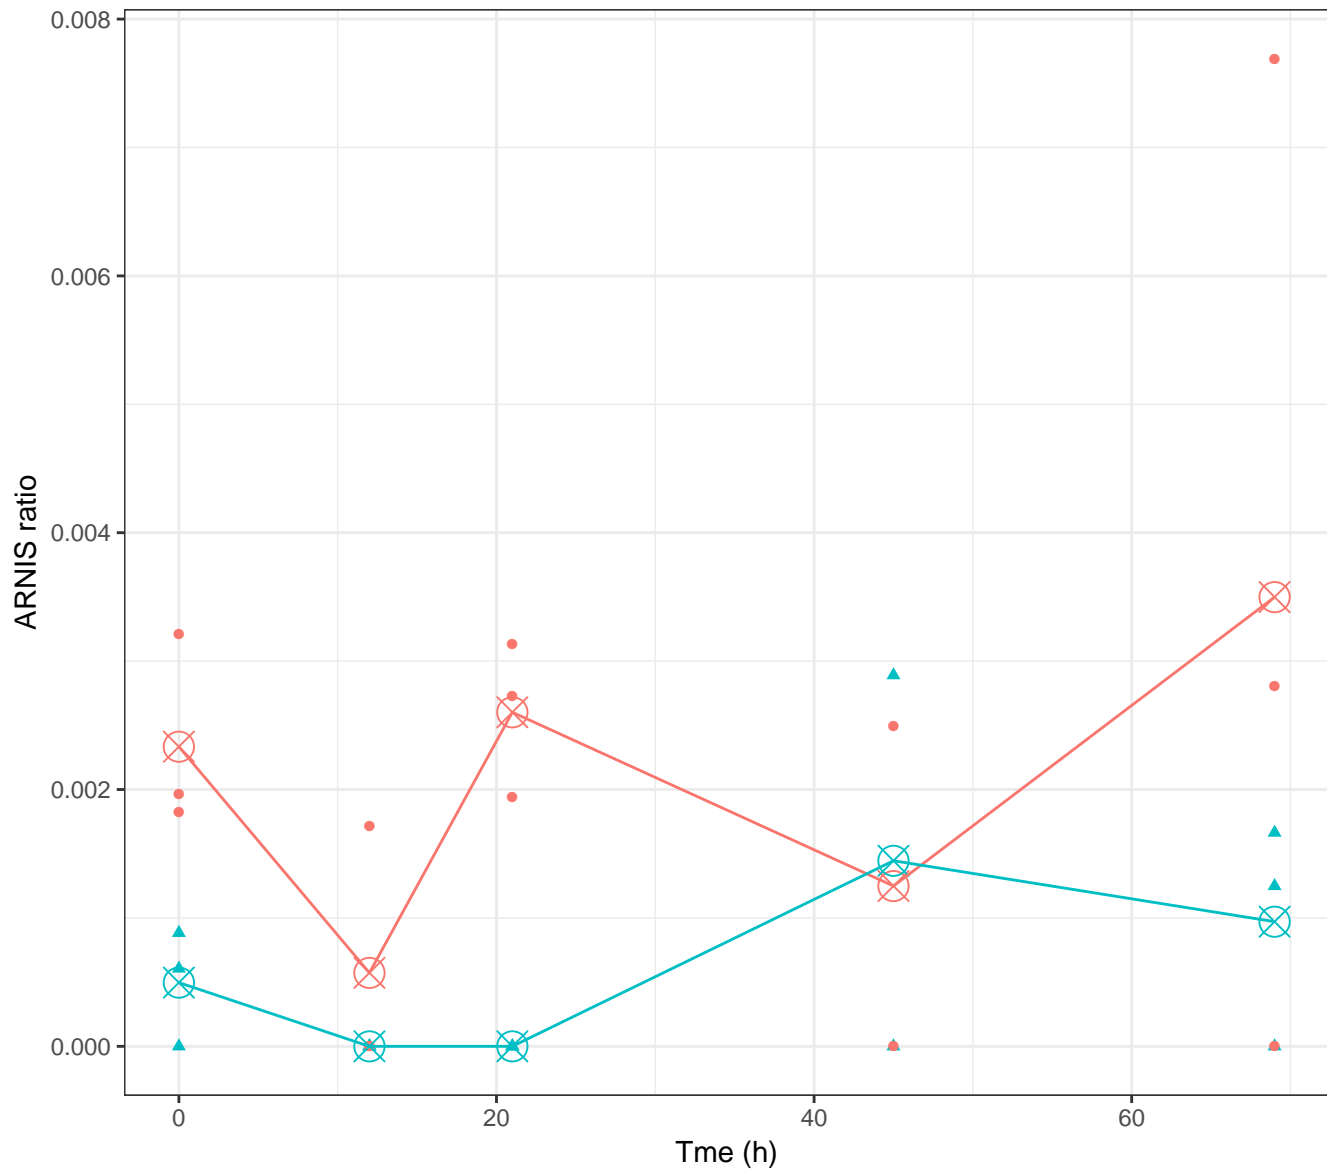

# OTU.1228\_Betaproteobacteria\_Burkholderiales

Treatment ⊗ Control ⊗ Filtered-1micron

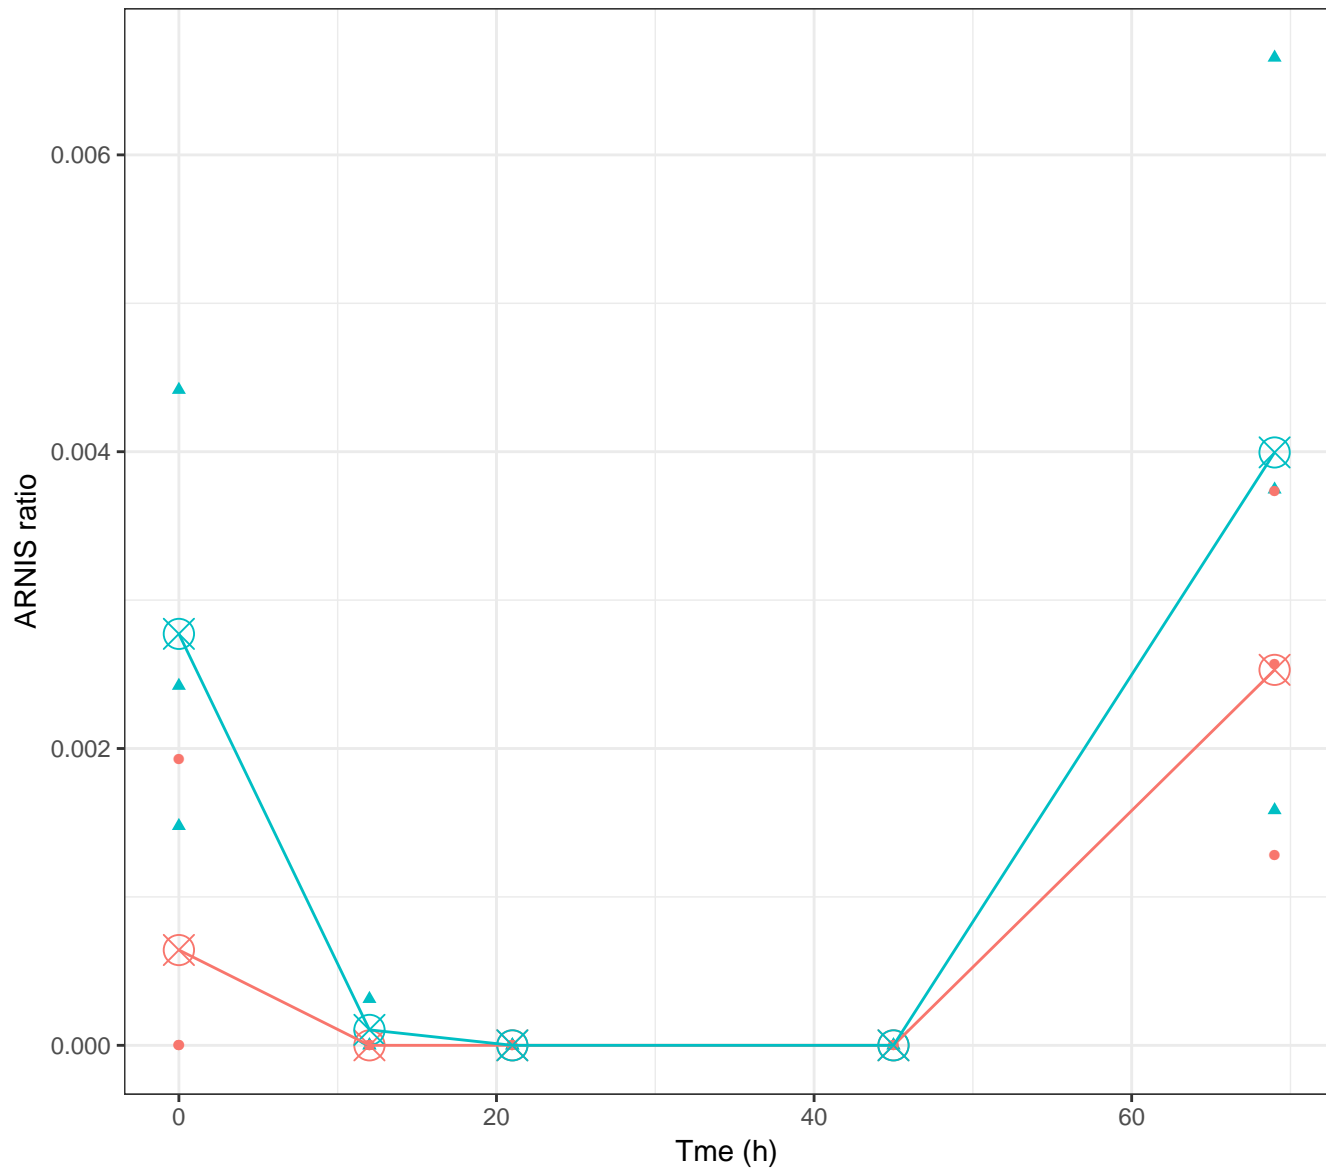

# OTU.560\_Actinobacteria\_acl.B1

Treatment ⊗ Control ⊗ Filtered-1micron

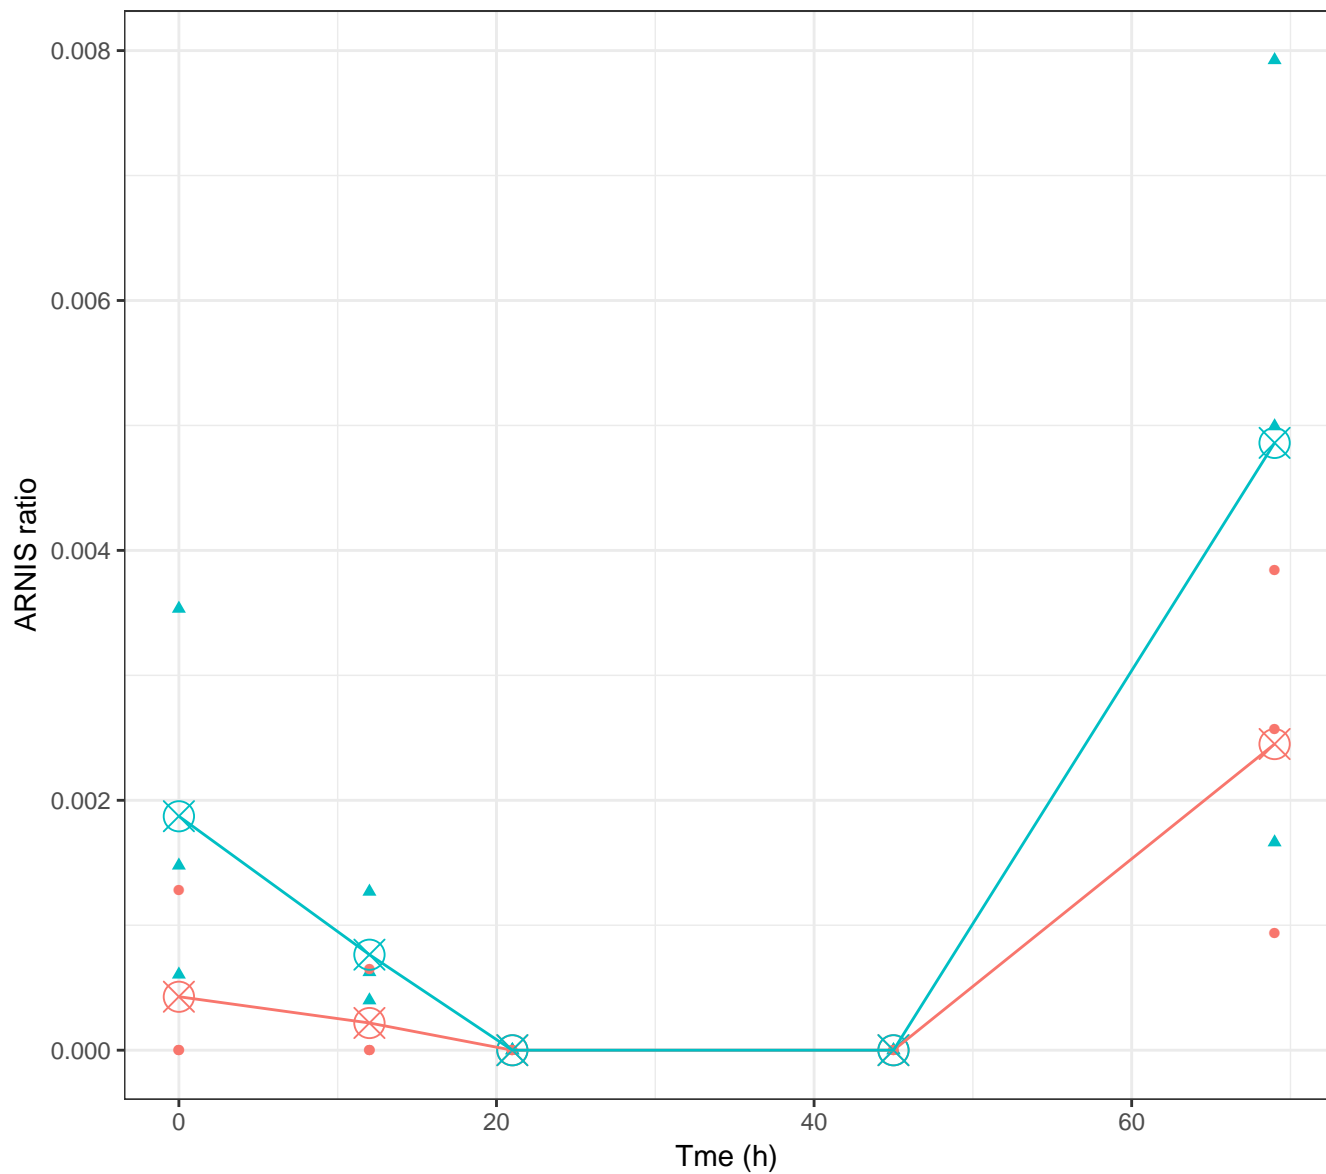

# OTU.865\_Actinobacteria\_Microbacteriaceae

Treatment ⊗ Control ⊗ Filtered-1micron

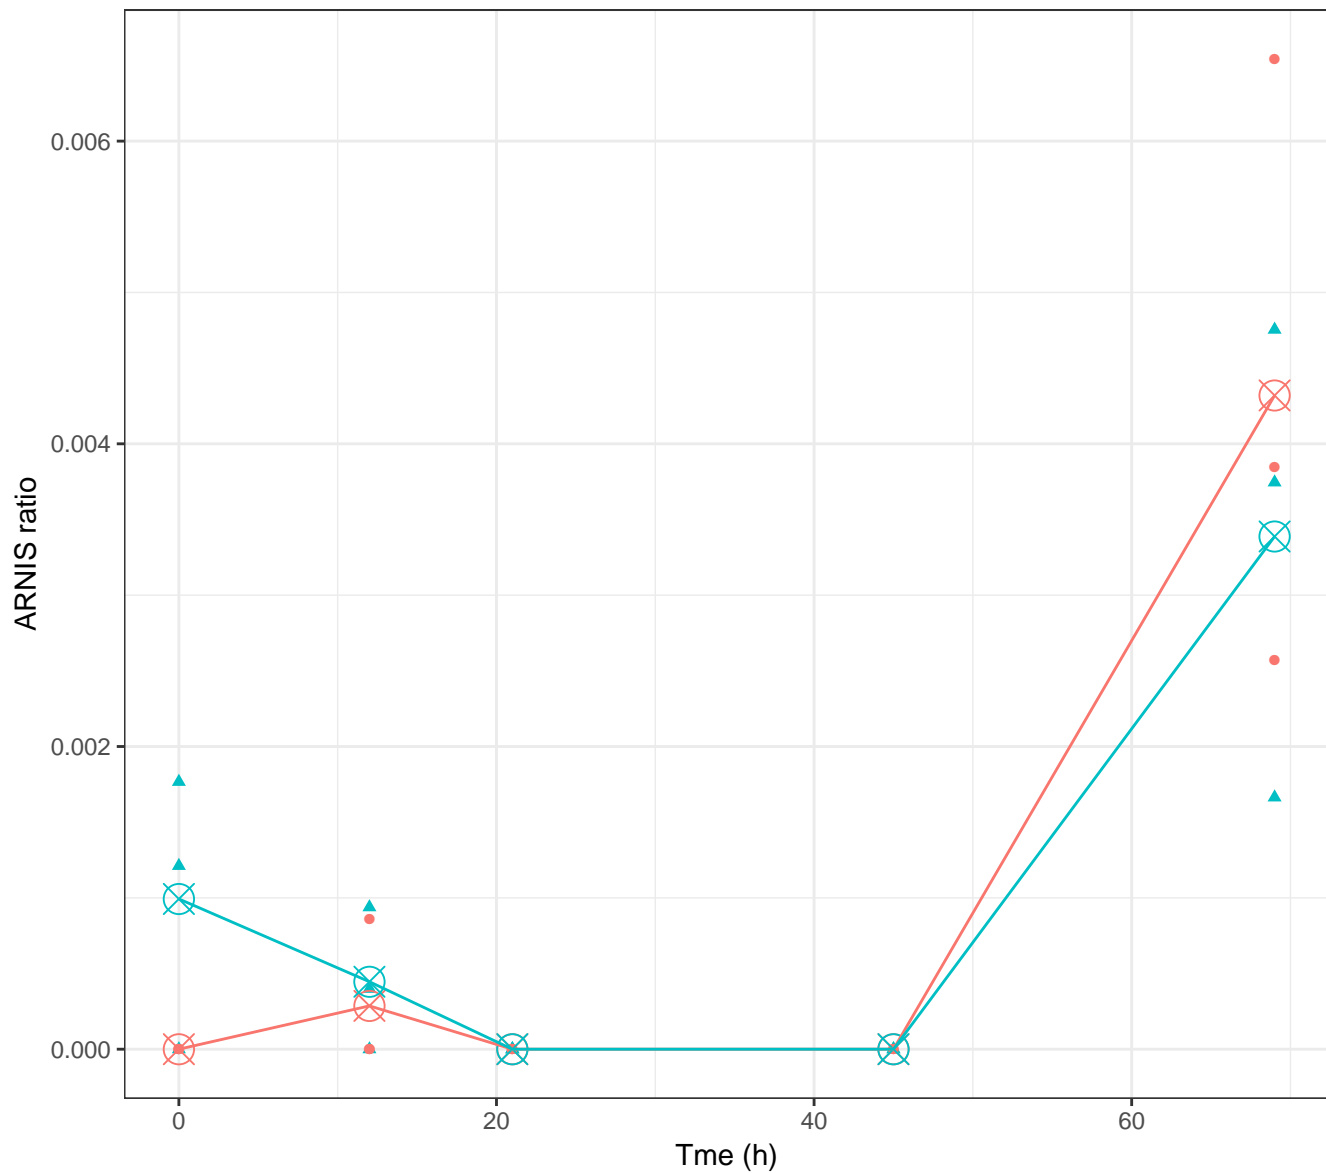

# OTU.105\_Actinobacteria\_CL500.29\_marine\_group\_freshwater\_clade\_aclV.A

Treatment ⊗ Control ⊗ Filtered-1micron

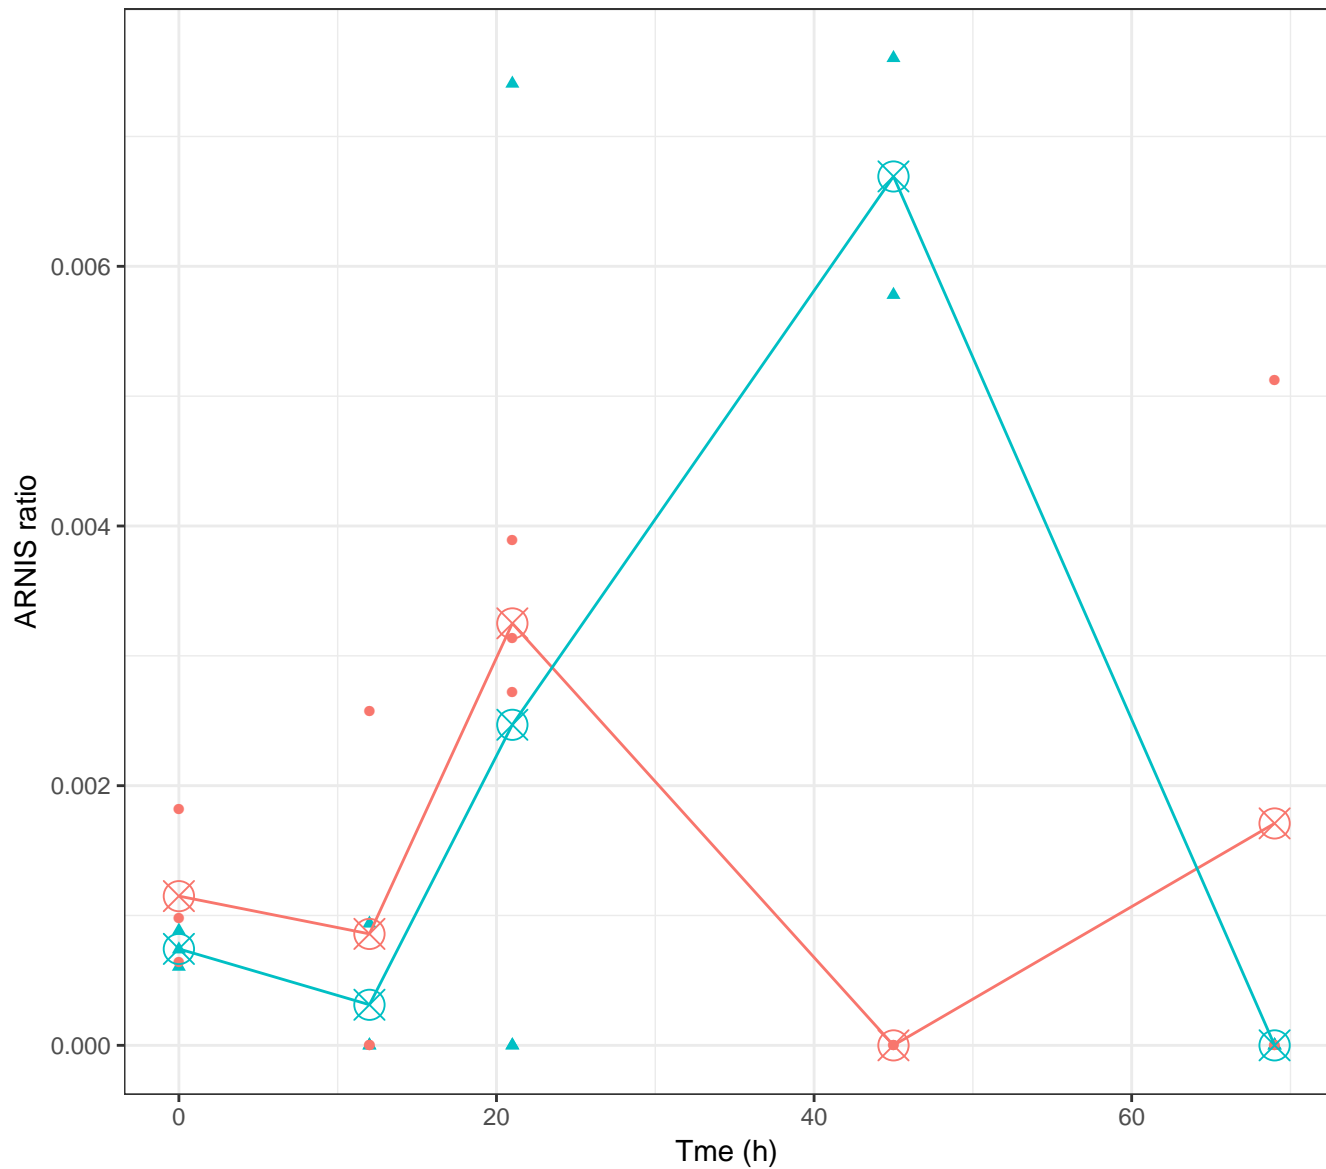

# OTU.8063\_Bacteroidetes\_Flavobacterium

Treatment Control Filtered-1micron

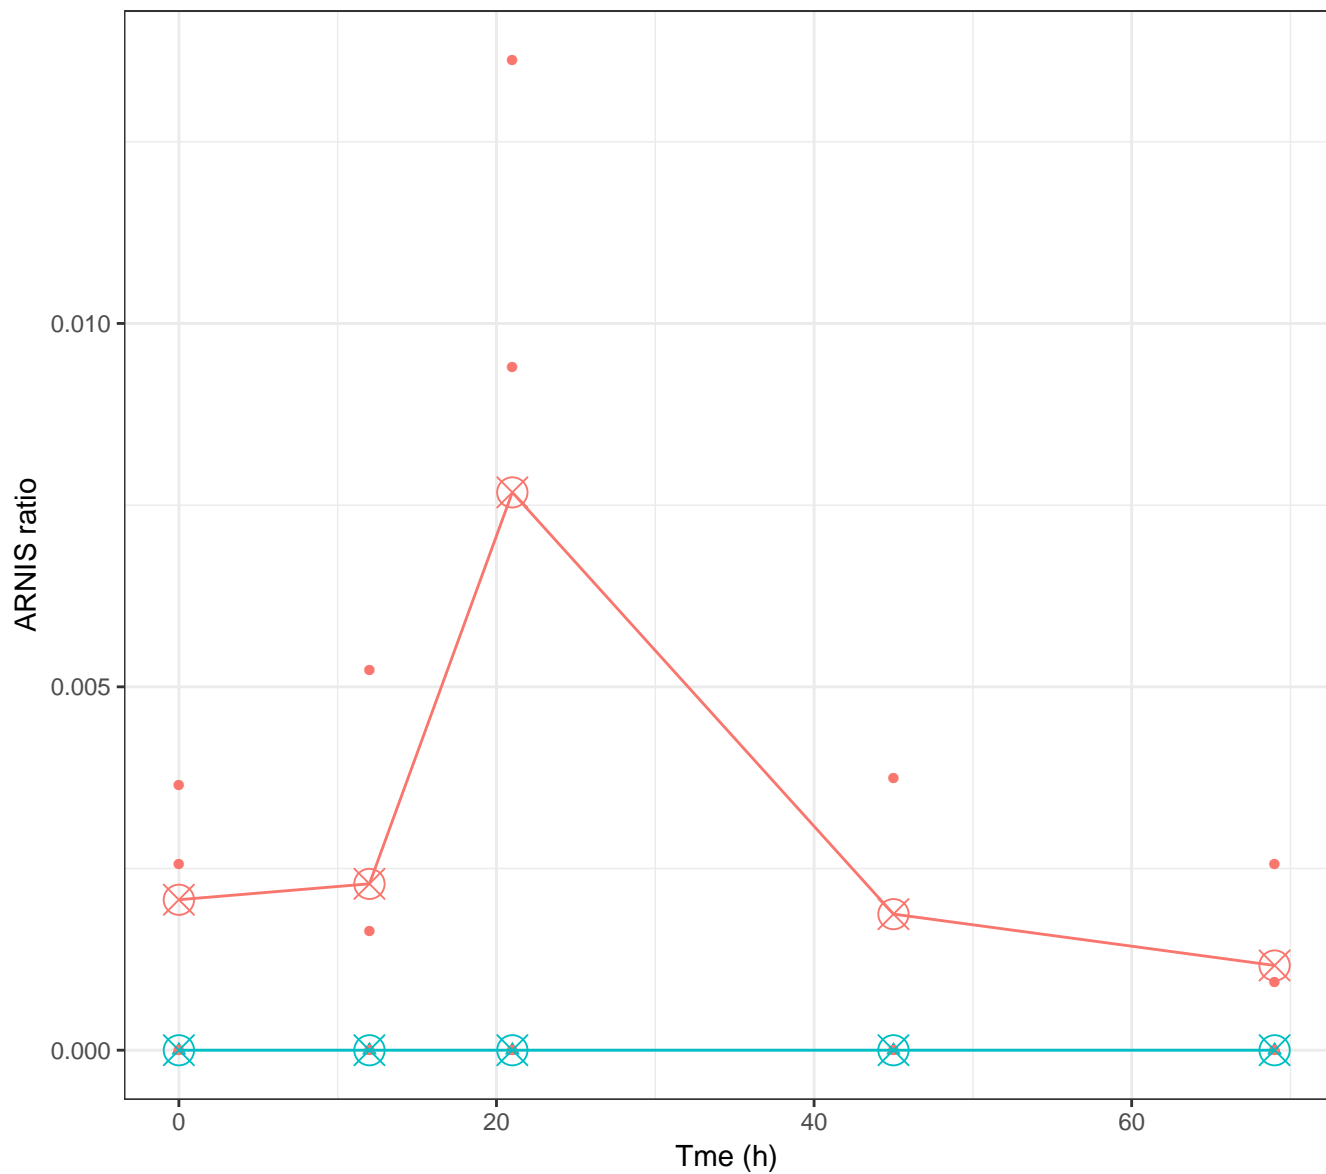



## OTU.1219\_Verrucomicrobia\_vadinHA64

Treatment  Control  Filtered-1micron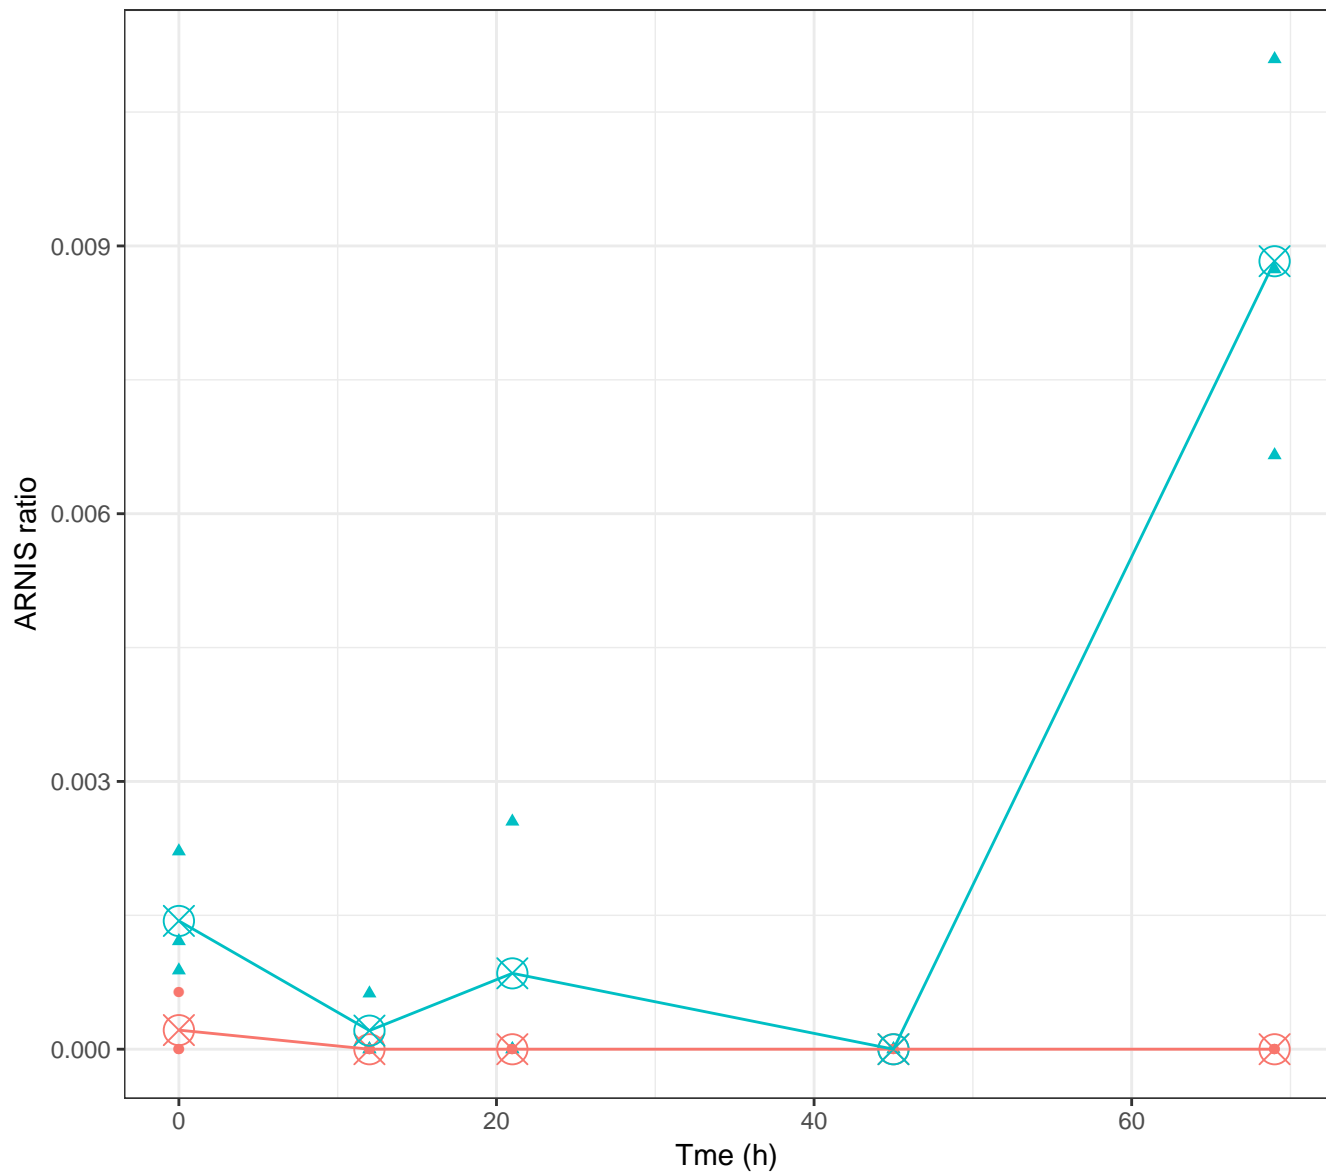

## OTU.1109\_Actinobacteria.clade\_acl.A

Treatment  Control  Filtered-1micron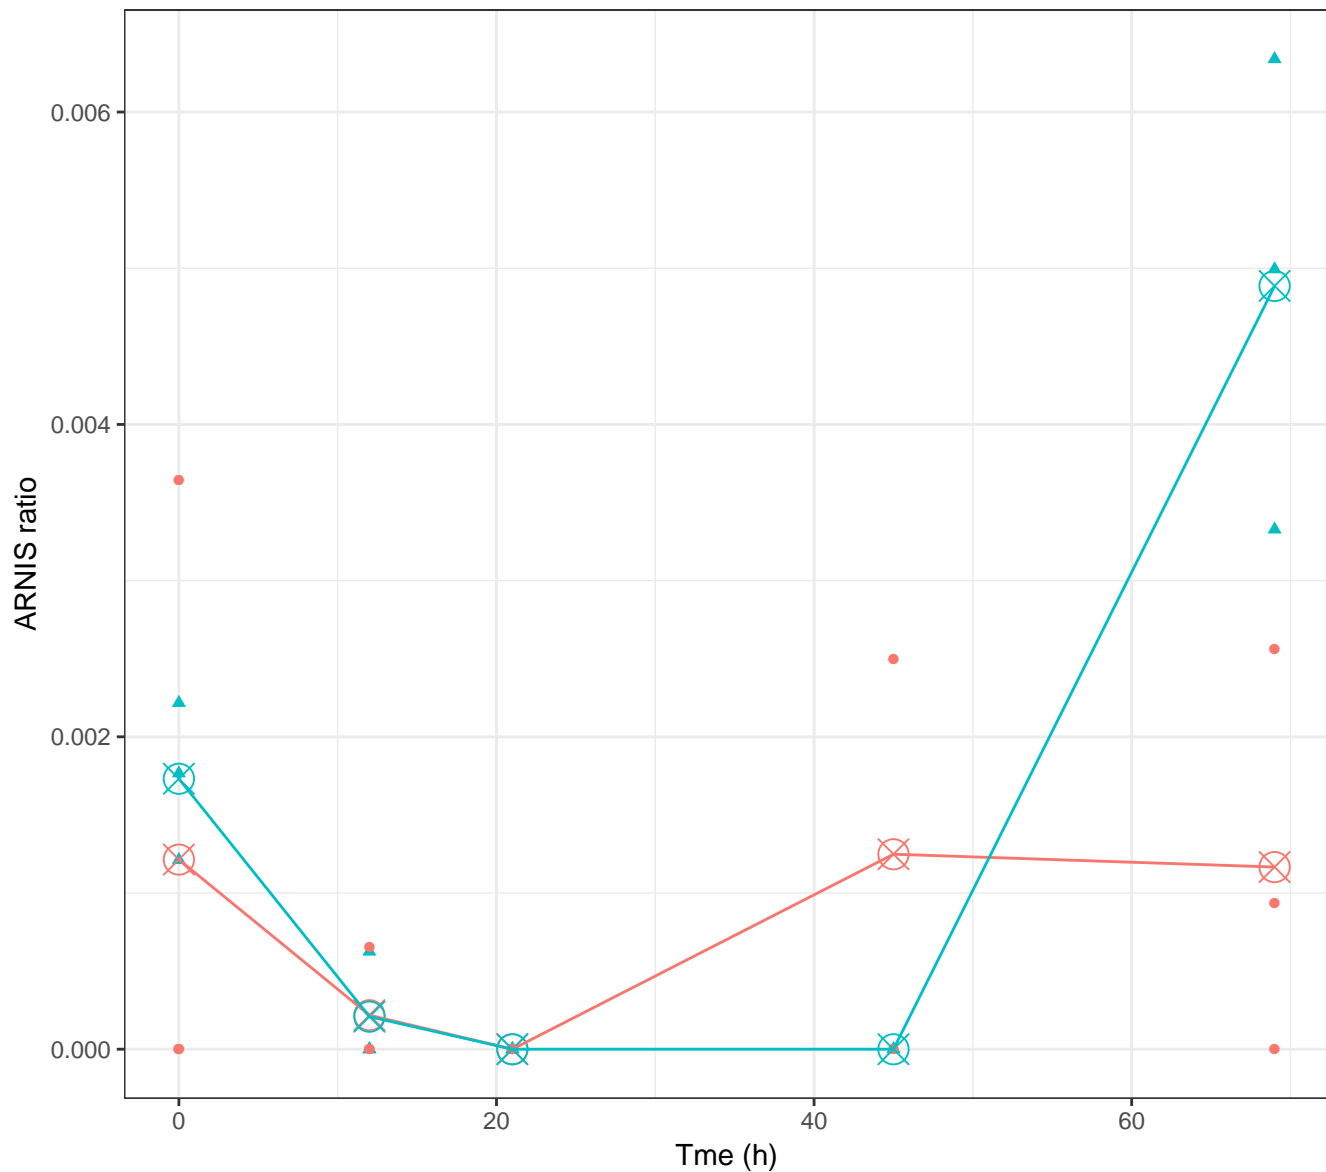

# OTU.469\_Bacteroidetes\_Sphingobacteriales\_AKYH767

Treatment ⊗ Control ⊗ Filtered-1micron

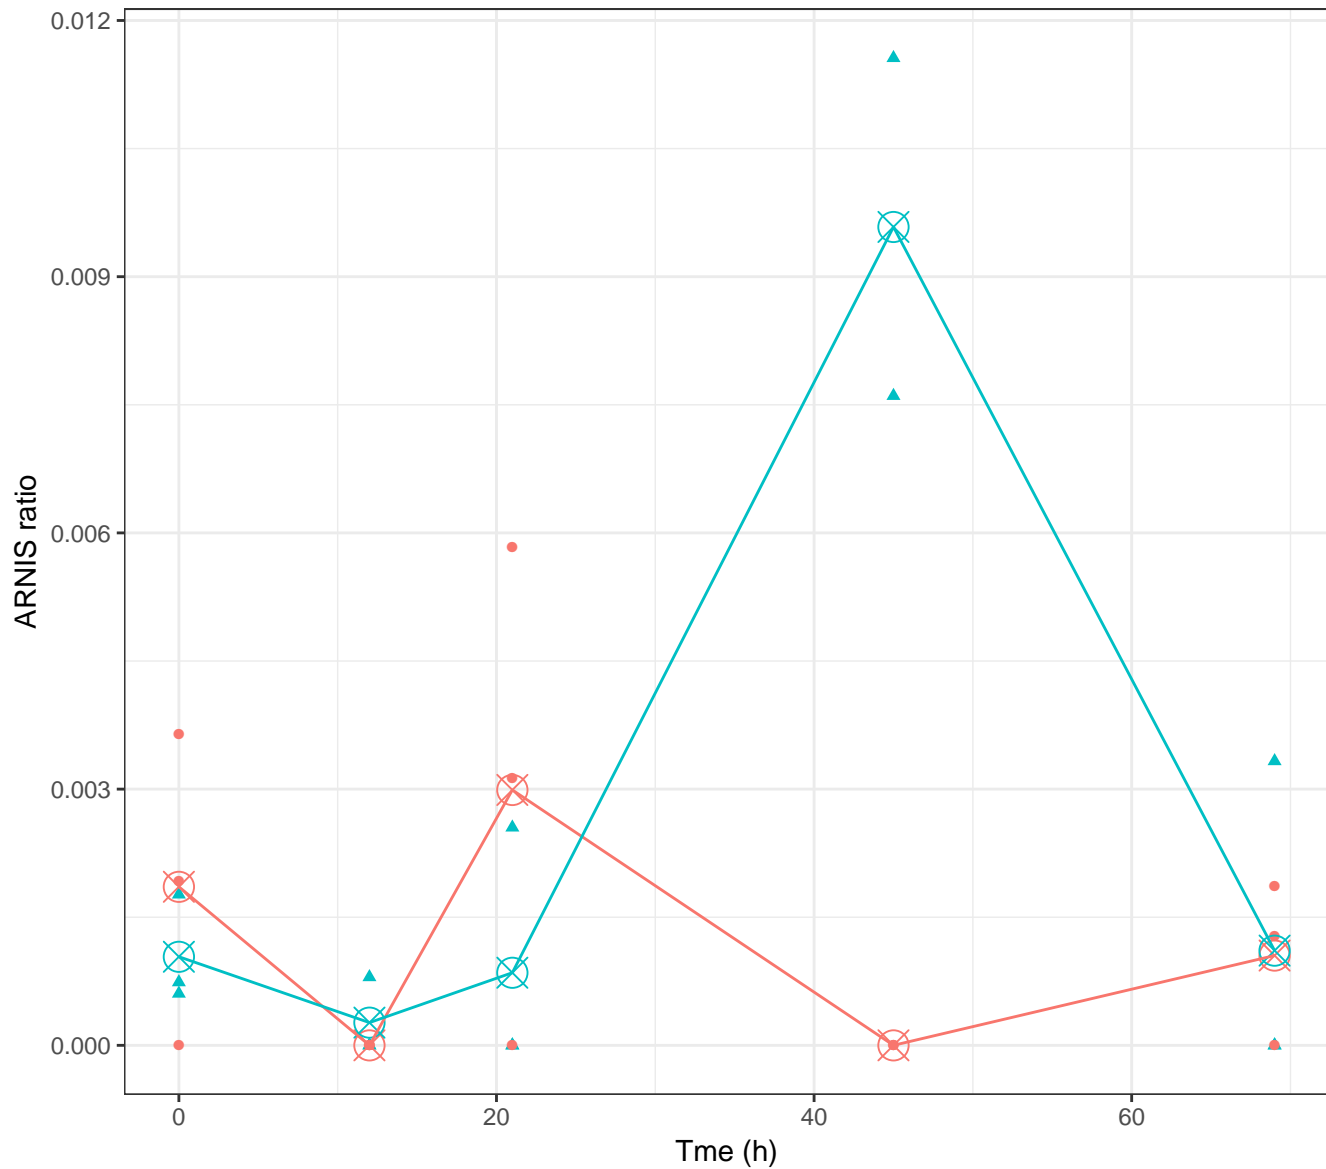

# OTU.109\_Actinobacteria\_Gaiellales

Treatment ⊗ Control ⊗ Filtered-1micron

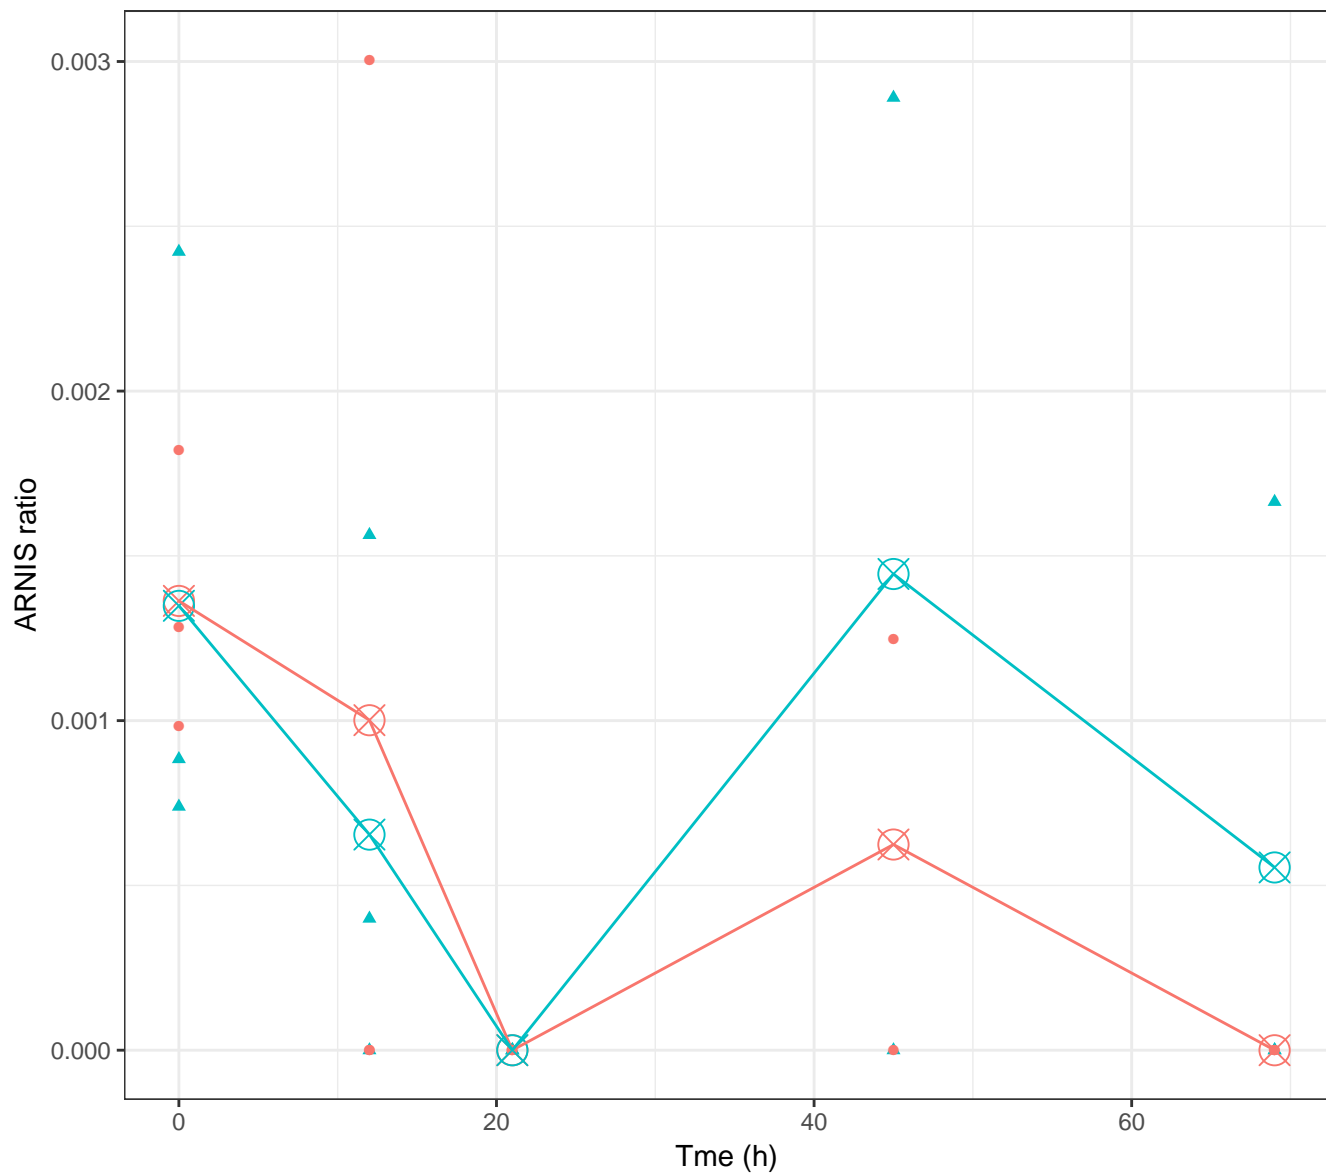

# OTU.404\_Alphaproteobacteria\_Meganema

Treatment  Control  Filtered-1micron

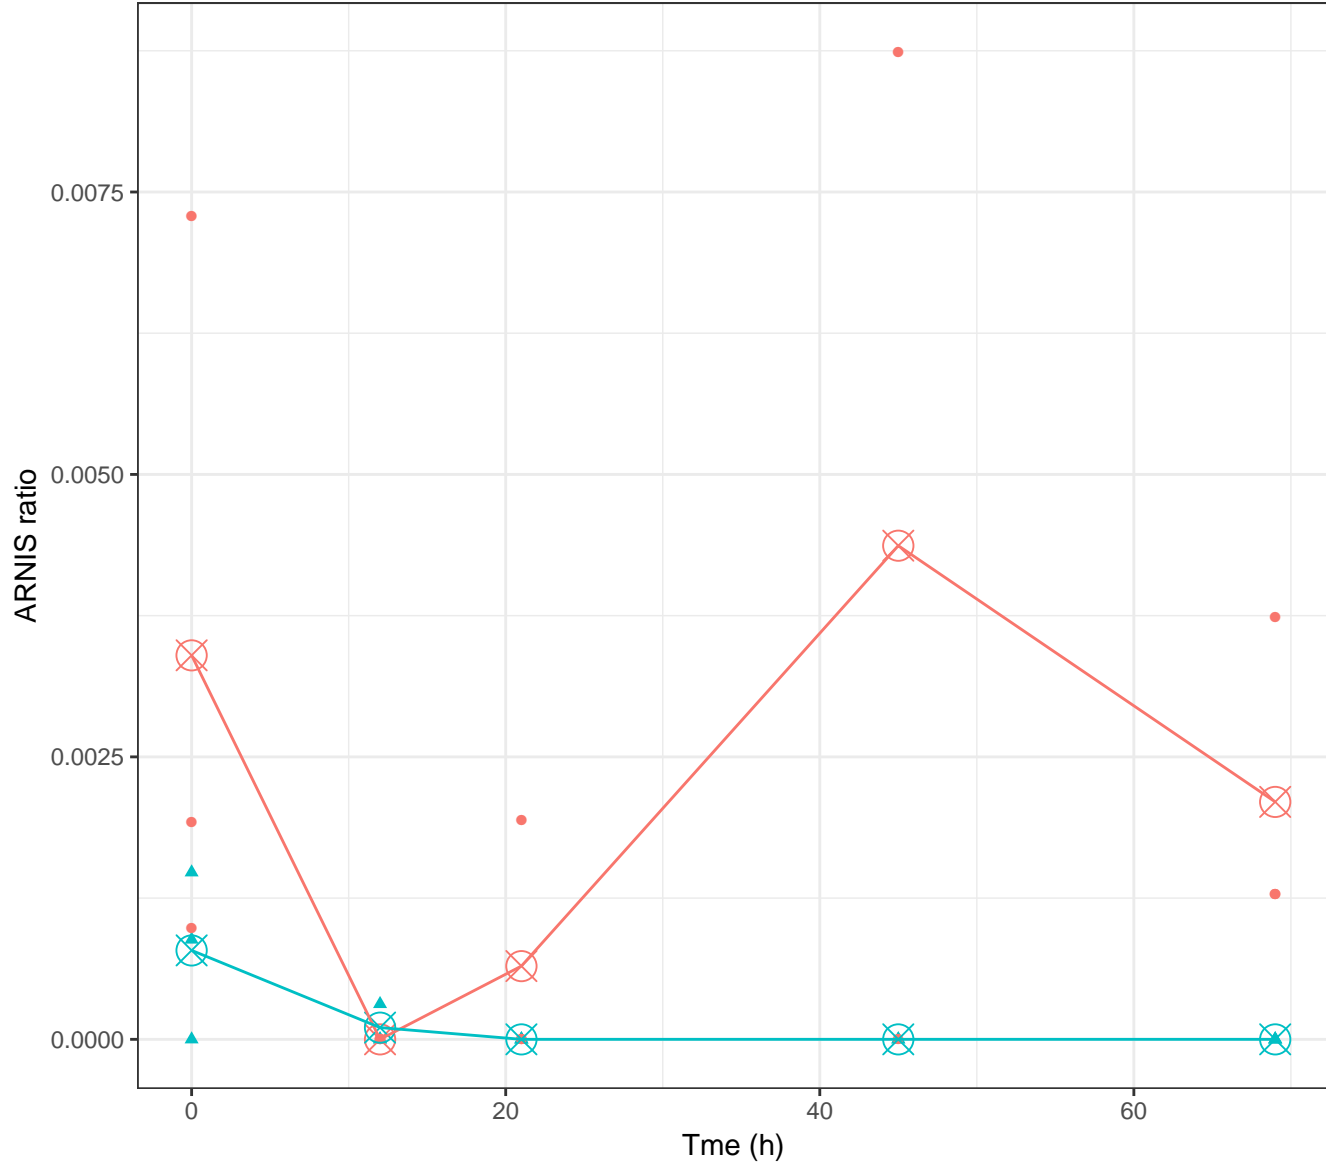

## OTU.377\_Actinobacteria\_clade\_acSTL

Treatment  Control  Filtered-1micron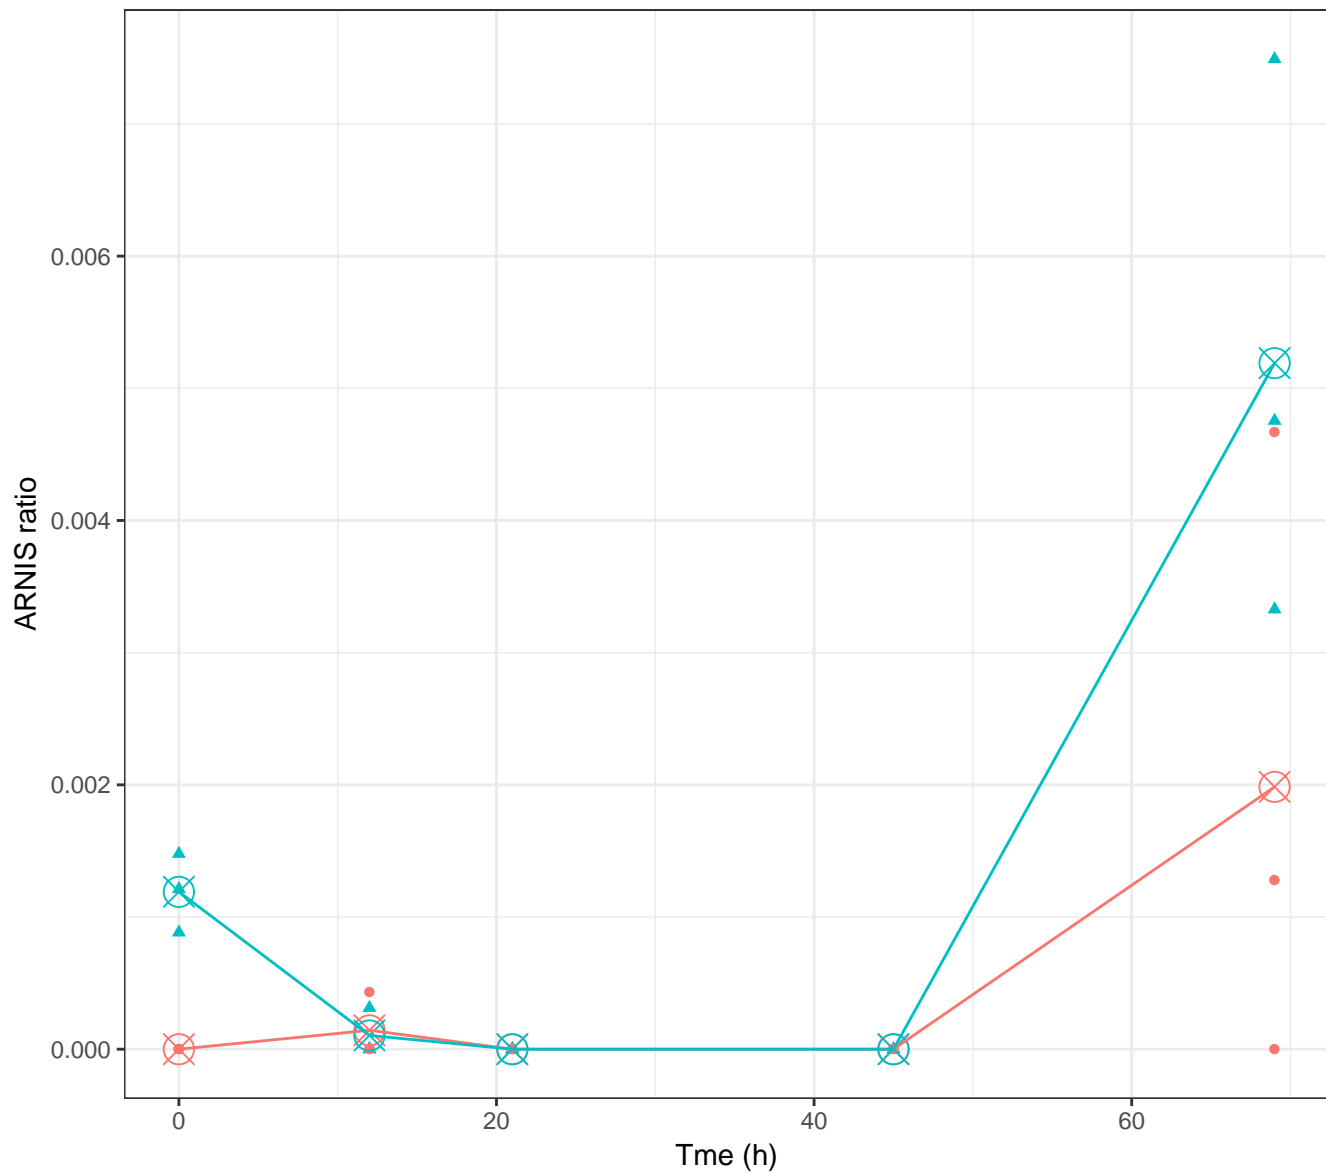

# OTU.1606\_Verrucomicrobia\_Chthoniobacterales

Treatment ⊗ Control ⊗ Filtered-1micron

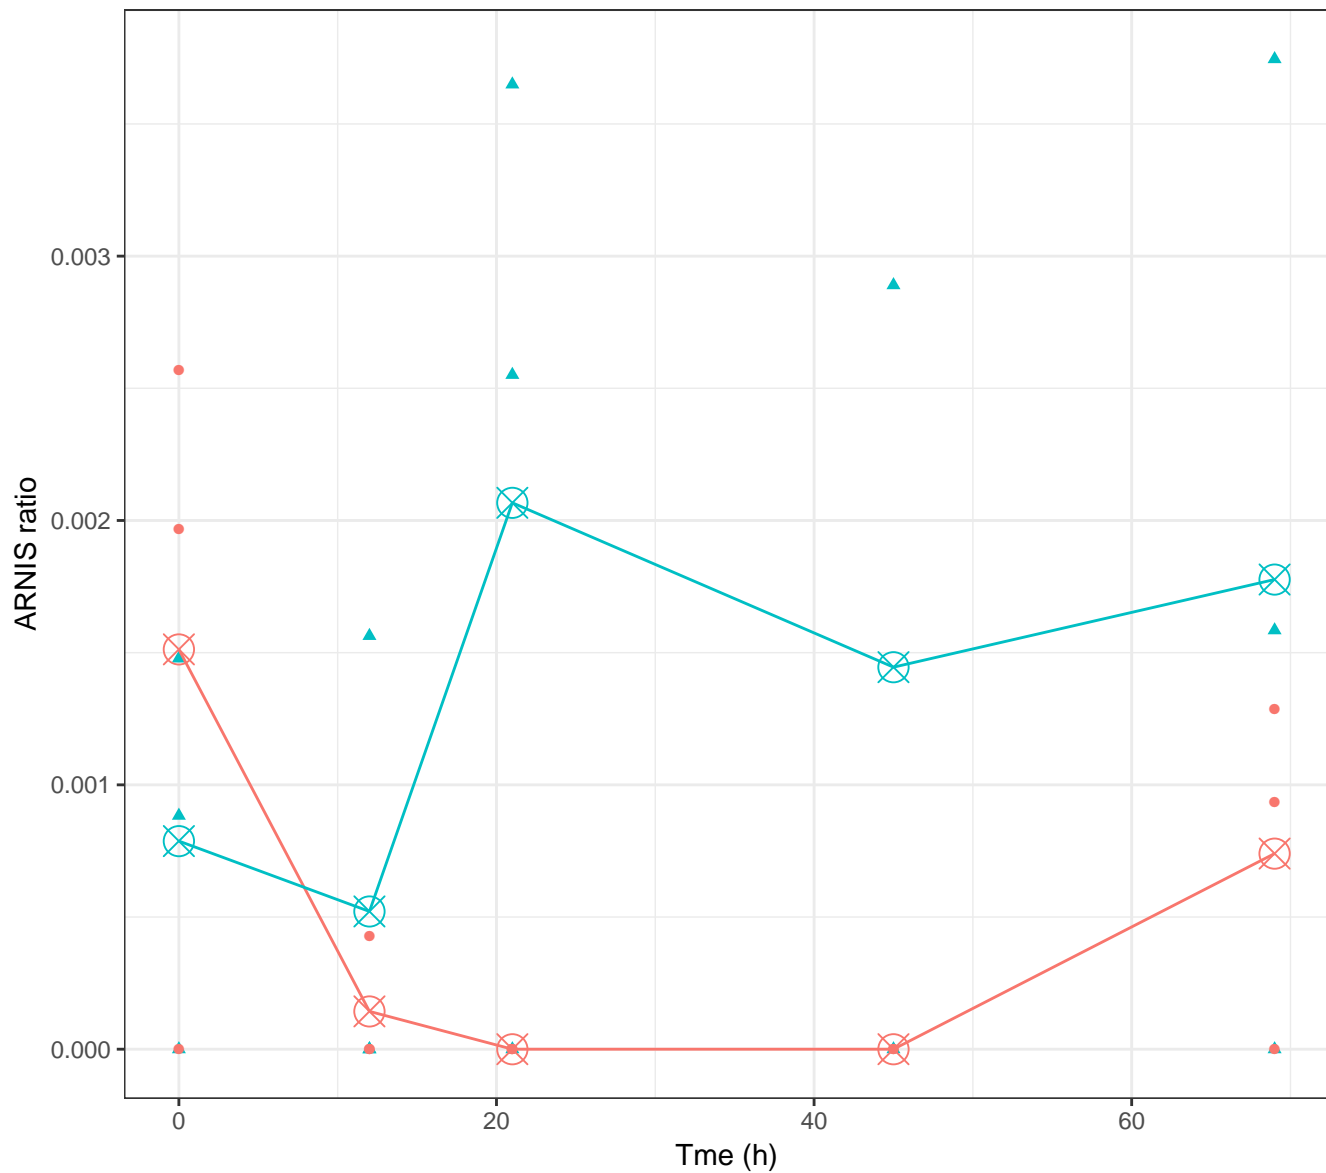

# OTU.253\_Bacteroidetes\_Flavobacterium

Treatment ⊗ Control ⊗ Filtered-1micron

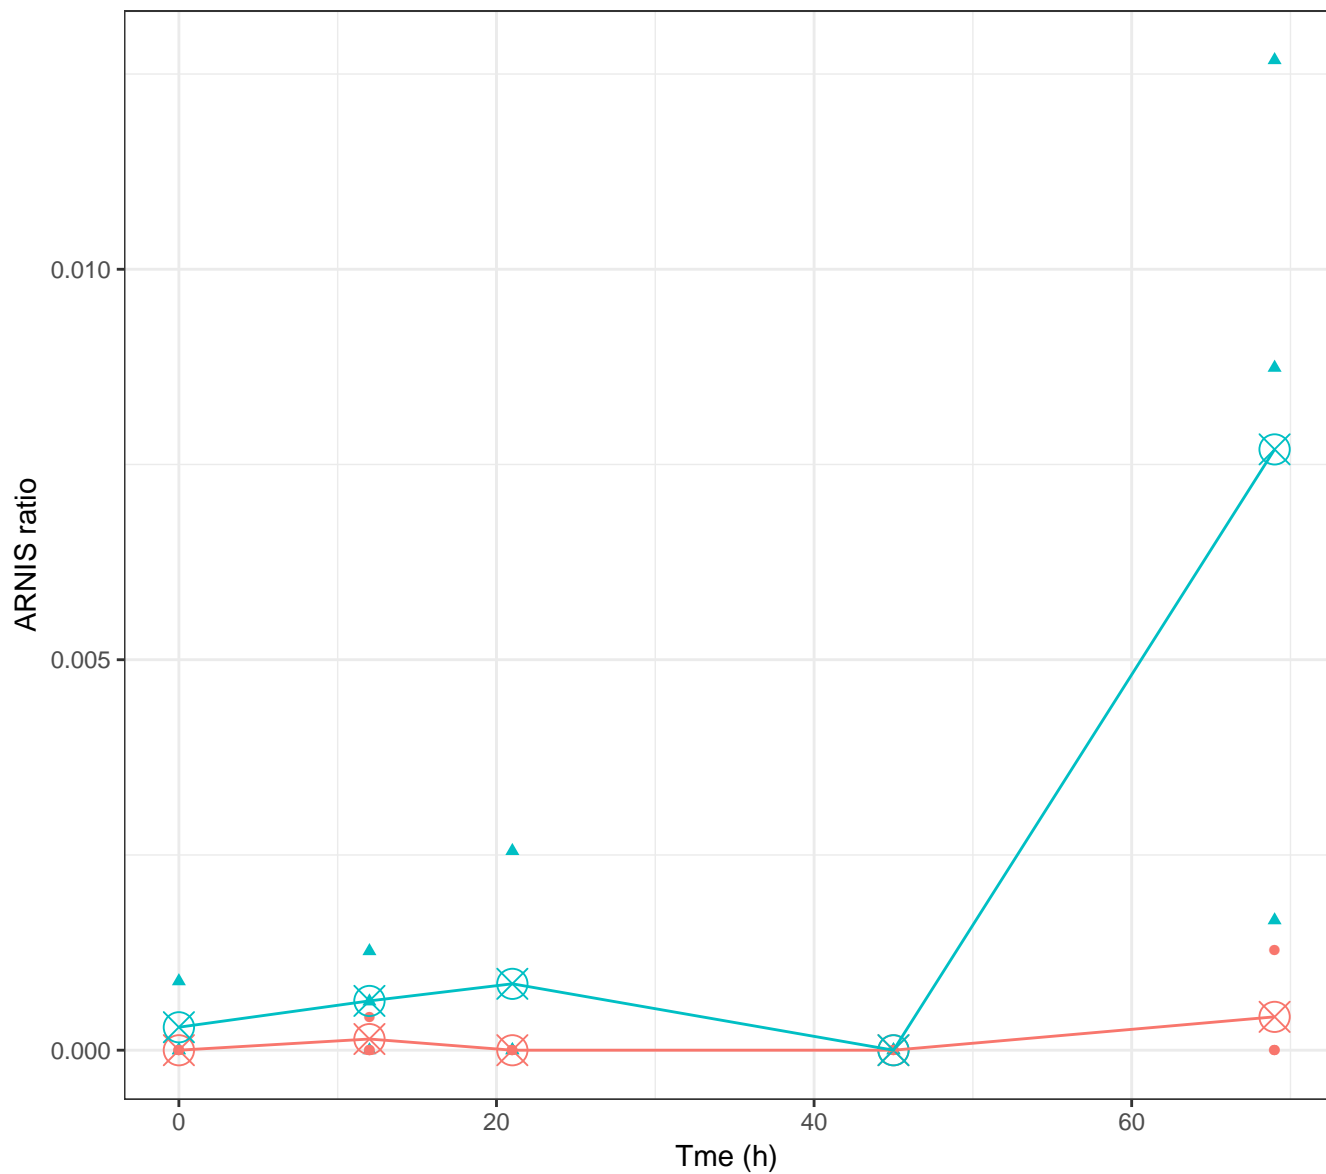

Supplement: 41396_2018_213_MOESM2_ESM.pdf [file 41396_2018_213_MOESM2_ESM.pdf]
