# Supplementary material for: Determining lineage-specific bacterial growth curves with a novel approach based on amplicon reads normalization using internal standard (ARNIS)
Source: PubMed Central journal article supplement (PMC6194029; doi:10.1038/s41396-018-0213-y), 2018-07-06
Supplement: 41396_2018_213_MOESM3_ESM.pdf [file 41396_2018_213_MOESM3_ESM.pdf]

**Supplementary Table 1.** Expected (Exp.) and actual (Act., from microscopic counts) abundance of species in mock communities ( $10^5$  cells mL<sup>-1</sup>). Total bacterial abundance from DAPI counts.

| Species                   | Phylum              | M1   |      | M2   |      | M3   |      | M4   |      | M5   |      |
|---------------------------|---------------------|------|------|------|------|------|------|------|------|------|------|
|                           |                     | Exp. | Act. | Exp. | Act. | Exp. | Act. | Exp. | Act. | Exp. | Act. |
| <i>Rhodoluna</i>          | Actinobacteria      | 1.5  | 0.4  | 2.4  | 2.0  | 3.1  | 1.5  | 6.5  | 4.8  | 4.7  | 4.9  |
| <i>lacicola</i>           | Microbacteriaceae   |      |      |      |      |      |      |      |      |      |      |
| <i>Sphingomonas</i>       | Proteobacteria      | 3.4  | 2.6  | 3.3  | 2.7  | 1.4  | 1.0  | 17.6 | 16.9 | 18.2 | 14.8 |
| sp. AAP5                  | Alphaproteobacteria |      |      |      |      |      |      |      |      |      |      |
| <i>Flavobacterium</i>     | Bacteroidetes       | 0.08 | 0.8  | 0.08 | 3.7  | 0.7  | 1.6  | 8.8  | 11.1 | 22.7 | 20.5 |
| sp.                       | Flavobacteriia      |      |      |      |      |      |      |      |      |      |      |
| <i>Gemmatimonas</i>       | Gemmaminonadetes    | 0.05 | 0.1  | 1.1  | 2.5  | 4.7  | 2.5  | 17.2 | 18.0 | 7.8  | 8.7  |
| <i>phototrophica</i>      |                     |      |      |      |      |      |      |      |      |      |      |
| Total bacterial abundance |                     | 5.1  | 3.9  | 6.9  | 11.1 | 9.8  | 6.7  | 50.0 | 50.8 | 53.4 | 48.9 |
