# Supplementary material for: Determining lineage-specific bacterial growth curves with a novel approach based on amplicon reads normalization using internal standard (ARNIS)
Source: PubMed Central journal article supplement (PMC6194029; doi:10.1038/s41396-018-0213-y), 2018-07-06
Supplement: 41396_2018_213_MOESM4_ESM.pdf [file 41396_2018_213_MOESM4_ESM.pdf]

**Supplementary Table 2.** The list and sequences of CARD-FISH probes, competitors and helpers (H) used to verify the ARNIS approach. FA% – concentration of formamid in the hybridization buffer (at 37°C).

| Probe   | Target Group                     | Probe Sequence (5'-3') | Competitor/Helper Sequence (5'-3')                  | FA% | Reference              |
|---------|----------------------------------|------------------------|-----------------------------------------------------|-----|------------------------|
| HGC69a  | Actinobacteria                   | TATAGTTACCACCGCCGT     | none                                                | 30  | Roller et al 1994      |
| Ac1-852 | acI lineage of<br>Actinobacteria | AATGCGTTAGCTGCGTCGCA   | H1: AAACCGTGGAAGGTYCSCACA<br>H2: TCCCCAGGCGGGGCRCTT | 55  | Warnecke et al<br>2005 |
| ALF968  | Alphaproteobacteria              | GGTAAGGTTCTGCGCGTT     | none                                                | 55  | Neef 1997              |
| CF968   | Bacteroidetes                    | GGTAAGGTTCCCTCGCGTA    | none                                                | 55  | Acinas et al<br>2014   |
| BET42a  | Betaproteobacteria               | GCCTTCCCACCTTCGTTT     | Competitor: GCCTTCCCACATCGTTT                       | 55  | Manz et al 1992        |
| CF319a  | Cytophaga-<br>Flavobacteria      | TGGTCCGTGTCTCAGTAC     | none                                                | 55  | Manz et al 1996        |
| R-BT065 | <i>Limnohabitans</i> spp.        | GTTGCCCCCTCTACCGTT     | none                                                | 55  | Šimek et al<br>2001    |

## References

- Acinas SG, Ferrera I, Sarmiento H, Diez-Vives C, Forn I, Ruiz-Gonzalez C et al (2015). Validation of a new catalysed reporter deposition-fluorescence in situ hybridization probe for the accurate quantification of marine Bacteroidetes populations. *Environ Microbiol* 17: 3557-3569.
- Manz W, Amann R, Ludwig W, Wagner M, Schleifer KH (1992). Phylogenetic Oligodeoxynucleotide Probes for the Major Subclasses of Proteobacteria - Problems and Solutions. *Syst Appl Microbiol* 15: 593-600.
- Manz W, Amann R, Ludwig W, Vancanneyt M, Schleifer KH (1996). Application of a suite of 16S rRNA-specific oligonucleotide probes designed to investigate bacteria of the phylum cytophaga-flavobacter-bacteroides in the natural environment. *Microbiology* 142: 1097-1106.
- Neef A (1997). Anwendung der in situ Einzelzell-Identifizierung von Bakterien zur Populationsanalyse in komplexen mikrobiellen Biozönosen, Technische Universität München.
- Roller C, Wagner M, Amann R, Ludwig W, Schleifer KH (1994). In situ probing of Gram-positive bacteria with high DNA G+C content using 23S rRNA-targeted oligonucleotides. *Microbiology* 140: 2849-2858.
- Šimek K, Pernthaler J, Weinbauer MG, Horňák K, Dolan JR, Nedoma J et al (2001). Changes in bacterial community composition and dynamics and viral mortality rates associated with enhanced flagellate grazing in a mesoeutrophic reservoir. *Appl Environ Microbiol* 67: 2723-2733.
- Warnecke F, Sommaruga R, Sekar R, Hofer JS, Pernthaler J (2005). Abundances, identity, and growth state of actinobacteria in mountain lakes of different UV transparency. *Appl Environ Microbiol* 71: 5551-5559.
